# Supplementary material for: Immunoinformatic identification of B cell and T cell epitopes in the SARS-CoV-2 proteome
Source: PubMed Central journal article supplement (PMC7447814; doi:10.1038/s41598-020-70864-8), 2020-08-25
Supplement: 41598_2020_70864_MOESM1_ESM.pdf [file 41598_2020_70864_MOESM1_ESM.pdf]

**Immunoinformatic identification of B cell and T cell epitopes in the SARS-CoV-2 proteome**

Stephen N. Crooke, Inna G. Ovsyannikova, Richard B. Kennedy, Gregory A. Poland\*

Mayo Clinic Vaccine Research Group, Mayo Clinic, Rochester, MN USA

Correspondence:

Gregory A. Poland, M.D., Director – Vaccine Research Group, Mayo Clinic, Guggenheim Building  
611C, 200 First Street SW, Rochester, MN 55905 USA

Phone: (507) 284-4968; E-mail: [poland.gregory@mayo.edu](mailto:poland.gregory@mayo.edu)

CLUSTAL O(1.2.4) multiple sequence alignment

```

gb:MT020781|Organism:Severe -----TACCTTCCCA 10
gb:MT007544|Organism:Severe -----ATTAAGGTTTATACCTTCCCA 22
gb:MN994467|Organism:Severe -----ATTAAGGTTTATACCTTCCCA 22
gb:MT044257|Organism:Severe -----ATTAAGGTTTATACCTTCCCA 22
gb:MT106054|Organism:Severe -----ATTAAGGTTTATACCTTCCCA 22
gb:MT049951|Organism:Severe -----ATTAAGGTTTATACCTTCCCA 22
gb:MN975262|Organism:Severe -----ATTAAGGTTTATACCTTCCCA 22
gb:MT106052|Organism:Severe -----ATTAAGGTTTATACCTTCCCA 22
gb:LC522975|Organism:Severe -----AAAGGTTTATACCTTCCCA 19
gb:LC522973|Organism:Severe -----AAAGGTTTATACCTTCCCA 19
gb:LC522974|Organism:Severe -----AAAGGTTTATACCTTCCCA 19
gb:MN985325|Organism:Severe -----ATTAAGGTTTATACCTTCCCA 22
gb:MT020881|Organism:Severe -----ATTAAGGTTTATACCTTCCCA 22
gb:MT020880|Organism:Severe -----ATTAAGGTTTATACCTTCCCA 22
gb:MT066175|Organism:Severe -----ATTAAGGTTTATACCTTCCCA 22
gb:MN997409|Organism:Severe -----ATTAAGGTTTATACCTTCCCA 22
gb:MN938384|Organism:Severe ----- 0
gb:MT044258|Organism:Severe -----ATTAAGGTTTATACCTTCCCA 22
gb:MT039890|Organism:Severe -----ATTAAGGTTTATACCTTCCCA 22
gb:MN988713|Organism:Severe -----ATTAAGGTTTATACCTTCCCA 22
gb:LC521925|Organism:Severe -----AAAGGTTTATACCTTCCCA 19
gb:MT093571|Organism:Severe -----ATTAAGGTTTATACCTTCCCA 22
gb:MT039887|Organism:Severe -----ATTAAGGTTTATACCTTCCCA 22
gb:MT019530|Organism:Severe -----ATTAAGGTTTATACCTTCCCA 22
gb:MT039888|Organism:Severe -----ATTAAGGTTTATACCTTCCCA 22
gb:LC522972|Organism:Severe -----AAAGGTTTATACCTTCCCA 19
gb:MT027063|Organism:Severe -----ATTAAGGTTTATACCTTCCCA 22
gb:MT027062|Organism:Severe -----ATTAAGGTTTATACCTTCCCA 22
gb:MT019529|Organism:Severe -----ATTAAGGTTTATACCTTCCCA 22
gb:MN996529|Organism:Severe -----TACCTTCCCA 10
gb:MN996531|Organism:Severe -----ACCTTCCCA 9
gb:MT066176|Organism:Severe -----ATTAAGGTTTATACCTTCCCA 22
gb:MT027064|Organism:Severe -----ATTAAGGTTTATACCTTCCCA 22
gb:MN994468|Organism:Severe -----ATTAAGGTTTATACCTTCCCA 22
gb:MT072688|Organism:Severe -----CTTCCCA 7
gb:MN996527|Organism:Severe ----- 0
gb:MT093631|Organism:Severe AGAGTGCTTATGAAAATTTAATCAGCACGAAGTCTACTTGCACCATTATACCTTCCCA 60
gb:MT106053|Organism:Severe -----ATTAAGGTTTATACCTTCCCA 22
gb:MT019533|Organism:Severe -----ATTAAGGTTTATACCTTCCCA 22
gb:MT019531|Organism:Severe -----ATTAAGGTTTATACCTTCCCA 22
gb:MN996528|Organism:Severe -----ATTAAGGTTTATACCTTCCCA 22
gb:MN996530|Organism:Severe -----CCTTCCCA 8
gb:MN908947|Organism:Severe -----ATTAAGGTTTATACCTTCCCA 22
gb:MT019532|Organism:Severe -----ATTAAGGTTTATACCTTCCCA 22

```

```

gb:MT020781|Organism:Severe GGTAACAAACCAACCAACTTTCGATCTCTTGTAGATCTGTTCTCTAAACGAACTTTAAAA 70
gb:MT007544|Organism:Severe GGTAACAAACCAACCAACTTTCGATCTCTTGTAGATCTGTTCTCTAAACGAACTTTAAAA 82
gb:MN994467|Organism:Severe GGTAACAAACCAACCAACTTTCGATCTCTTGTAGATCTGTTCTCTAAACGAACTTTAAAA 82
gb:MT044257|Organism:Severe GGTAACAAACCAACCAACTTTCGATCTCTTGTAGATCTGTTCTCTAAACGAACTTTAAAA 82
gb:MT106054|Organism:Severe GGTAACAAACCAACCAACTTTCGATCTCTTGTAGATCTGTTCTCTAAACGAACTTTAAAA 82
gb:MT049951|Organism:Severe GGTAACAAACCAACCAACTTTCGATCTCTTGTAGATCTGTTCTCTAAACGAACTTTAAAA 82
gb:MN975262|Organism:Severe GGTAACAAACCAACCAACTTTCGATCTCTTGTAGATCTGTTCTCTAAACGAACTTTAAAA 82
gb:MT106052|Organism:Severe GGTAACAAACCAACCAACTTTCGATCTCTTGTAGATCTGTTCTCTAAACGAACTTTAAAA 82
gb:LC522975|Organism:Severe GGTAACAAACCAACCAACTTTCGATCTCTTGTAGATCTGTTCTCTAAACGAACTTTAAAA 79
gb:LC522973|Organism:Severe GGTAACAAACCAACCAACTTTCGATCTCTTGTAGATCTGTTCTCTAAACGAACTTTAAAA 79
gb:LC522974|Organism:Severe GGTAACAAACCAACCAACTTTCGATCTCTTGTAGATCTGTTCTCTAAACGAACTTTAAAA 79
gb:MN985325|Organism:Severe GGTAACAAACCAACCAACTTTCGATCTCTTGTAGATCTGTTCTCTAAACGAACTTTAAAA 82
gb:MT020881|Organism:Severe GGTAACAAACCAACCAACTTTCGATCTCTTGTAGATCTGTTCTCTAAACGAACTTTAAAA 82
gb:MT020880|Organism:Severe GGTAACAAACCAACCAACTTTCGATCTCTTGTAGATCTGTTCTCTAAACGAACTTTAAAA 82
gb:MT066175|Organism:Severe GGTAACAAACCAACCAACTTTCGATCTCTTGTAGATCTGTTCTCTAAACGAACTTTAAAA 82

```



|             |                 |                                                               |     |
|-------------|-----------------|---------------------------------------------------------------|-----|
| gb:MT072688 | Organism:Severe | TCTGTGTGGCTGTCACTCGGCTGCATGCTTAGTGCACCTCACGCAGTATAATTAATAACTA | 127 |
| gb:MN996527 | Organism:Severe | TCTGTGTGGCTGTCACTCGGCTGCATGCTTAGTGCACCTCACGCAGTATAATTAATAACTA | 109 |
| gb:MT093631 | Organism:Severe | TCTGTGTGGCTGTCACTCGGCTGCATGCTTAGTGCACCTCACGCAGTATAATTAATAACTA | 180 |
| gb:MT106053 | Organism:Severe | TCTGTGTGGCTGTCACTCGGCTGCATGCTTAGTGCACCTCACGCAGTATAATTAATAACTA | 142 |
| gb:MT019533 | Organism:Severe | TCTGTGTGGCTGTCACTCGGCTGCATGCTTAGTGCACCTCACGCAGTATAATTAATAACTA | 142 |
| gb:MT019531 | Organism:Severe | TCTGTGTGGCTGTCACTCGGCTGCATGCTTAGTGCACCTCACGCAGTATAATTAATAACTA | 142 |
| gb:MN996528 | Organism:Severe | TCTGTGTGGCTGTCACTCGGCTGCATGCTTAGTGCACCTCACGCAGTATAATTAATAACTA | 142 |
| gb:MN996530 | Organism:Severe | TCTGTGTGGCTGTCACTCGGCTGCATGCTTAGTGCACCTCACGCAGTATAATTAATAACTA | 128 |
| gb:MN908947 | Organism:Severe | TCTGTGTGGCTGTCACTCGGCTGCATGCTTAGTGCACCTCACGCAGTATAATTAATAACTA | 142 |
| gb:MT019532 | Organism:Severe | TCTGTGTGGCTGTCACTCGGCTGCATGCTTAGTGCACCTCACGCAGTATAATTAATAACTA | 142 |

\*\*\*\*\*

|             |                 |                                                              |     |
|-------------|-----------------|--------------------------------------------------------------|-----|
| gb:MT020781 | Organism:Severe | ATTACTGTCGTTGACAGGACACGAGTAACTCGTCTATCTTCTGCAGGCTGCTTACGGTTT | 190 |
| gb:MT007544 | Organism:Severe | ATTACTGTCGTTGACAGGACACGAGTAACTCGTCTATCTTCTGCAGGCTGCTTACGGTTT | 202 |
| gb:MN994467 | Organism:Severe | ATTACTGTCGTTGACAGGACACGAGTAACTCGTCTATCTTCTGCAGGCTGCTTACGGTTT | 202 |
| gb:MT044257 | Organism:Severe | ATTACTGTCGTTGACAGGACACGAGTAACTCGTCTATCTTCTGCAGGCTGCTTACGGTTT | 202 |
| gb:MT106054 | Organism:Severe | ATTACTGTCGTTGACAGGACACGAGTAACTCGTCTATCTTCTGCAGGCTGCTTACGGTTT | 202 |
| gb:MT049951 | Organism:Severe | ATTACTGTCGTTGACAGGACACGAGTAACTCGTCTATCTTCTGCAGGCTGCTTACGGTTT | 202 |
| gb:MN975262 | Organism:Severe | ATTACTGTCGTTGACAGGACACGAGTAACTCGTCTATCTTCTGCAGGCTGCTTACGGTTT | 202 |
| gb:MT106052 | Organism:Severe | ATTACTGTCGTTGACAGGACACGAGTAACTCGTCTATCTTCTGCAGGCTGCTTACGGTTT | 202 |
| gb:LC522975 | Organism:Severe | ATTACTGTCGTTGACAGGACACGAGTAACTCGTCTATCTTCTGCAGGCTGCTTACGGTTT | 199 |
| gb:LC522973 | Organism:Severe | ATTACTGTCGTTGACAGGACACGAGTAACTCGTCTATCTTCTGCAGGCTGCTTACGGTTT | 199 |
| gb:LC522974 | Organism:Severe | ATTACTGTCGTTGACAGGACACGAGTAACTCGTCTATCTTCTGCAGGCTGCTTACGGTTT | 199 |
| gb:MN985325 | Organism:Severe | ATTACTGTCGTTGACAGGACACGAGTAACTCGTCTATCTTCTGCAGGCTGCTTACGGTTT | 202 |
| gb:MT020881 | Organism:Severe | ATTACTGTCGTTGACAGGACACGAGTAACTCGTCTATCTTCTGCAGGCTGCTTACGGTTT | 202 |
| gb:MT020880 | Organism:Severe | ATTACTGTCGTTGACAGGACACGAGTAACTCGTCTATCTTCTGCAGGCTGCTTACGGTTT | 202 |
| gb:MT066175 | Organism:Severe | ATTACTGTCGTTGACAGGACACGAGTAACTCGTCTATCTTCTGCAGGCTGCTTACGGTTT | 202 |
| gb:MN997409 | Organism:Severe | ATTACTGTCGTTGACAGGACACGAGTAACTCGTCTATCTTCTGCAGGCTGCTTACGGTTT | 202 |
| gb:MN938384 | Organism:Severe | ATTACTGTCGTTGACAGGACACGAGTAACTCGTCTATCTTCTGCAGGCTGCTTACGGTTT | 170 |
| gb:MT044258 | Organism:Severe | ATTACTGTCGTTGACAGGACACGAGTAACTCGTCTATCTTCTGCAGGCTGCTTACGGTTT | 202 |
| gb:MT039890 | Organism:Severe | ATTACTGTCGTTGACAGGACACGAGTAACTCGTCTATCTTCTGCAGGCTGCTTACGGTTT | 202 |
| gb:MN988713 | Organism:Severe | ATTACTGTCGTTGACAGGACACGAGTAACTCGTCTATCTTCTGCAGGCTGCTTACGGTTT | 202 |
| gb:LC521925 | Organism:Severe | ATTACTGTCGTTGACAGGACACGAGTAACTCGTCTATCTTCTGCAGGCTGCTTACGGTTT | 199 |
| gb:MT093571 | Organism:Severe | ATTACTGTCGTTGACAGGACACGAGTAACTCGTCTATCTTCTGCAGGCTGCTTACGGTTT | 202 |
| gb:MT039887 | Organism:Severe | ATTACTGTCGTTGACAGGACACGAGTAACTCGTCTATCTTCTGCAGGCTGCTTACGGTTT | 202 |
| gb:MT019530 | Organism:Severe | ATTACTGTCGTTGACAGGACACGAGTAACTCGTCTATCTTCTGCAGGCTGCTTACGGTTT | 202 |
| gb:MT039888 | Organism:Severe | ATTACTGTCGTTGACAGGACACGAGTAACTCGTCTATCTTCTGCAGGCTGCTTACGGTTT | 202 |
| gb:LC522972 | Organism:Severe | ATTACTGTCGTTGACAGGACACGAGTAACTCGTCTATCTTCTGCAGGCTGCTTACGGTTT | 199 |
| gb:MT027063 | Organism:Severe | ATTACTGTCGTTGACAGGACACGAGTAACTCGTCTATCTTCTGCAGGCTGCTTACGGTTT | 202 |
| gb:MT027062 | Organism:Severe | ATTACTGTCGTTGACAGGACACGAGTAACTCGTCTATCTTCTGCAGGCTGCTTACGGTTT | 202 |
| gb:MT019529 | Organism:Severe | ATTACTGTCGTTGACAGGACACGAGTAACTCGTCTATCTTCTGCAGGCTGCTTACGGTTT | 202 |
| gb:MN996529 | Organism:Severe | ATTACTGTCGTTGACAGGACACGAGTAACTCGTCTATCTTCTGCAGGCTGCTTACGGTTT | 190 |
| gb:MN996531 | Organism:Severe | ATTACTGTCGTTGACAGGACACGAGTAACTCGTCTATCTTCTGCAGGCTGCTTACGGTTT | 189 |
| gb:MT066176 | Organism:Severe | ATTACTGTCGTTGACAGGACACGAGTAACTCGTCTATCTTCTGCAGGCTGCTTACGGTTT | 202 |
| gb:MT027064 | Organism:Severe | ATTACTGTCGTTGACAGGACACGAGTAACTCGTCTATCTTCTGCAGGCTGCTTACGGTTT | 202 |
| gb:MN994468 | Organism:Severe | ATTACTGTCGTTGACAGGACACGAGTAACTCGTCTATCTTCTGCAGGCTGCTTACGGTTT | 202 |
| gb:MT072688 | Organism:Severe | ATTACTGTCGTTGACAGGACACGAGTAACTCGTCTATCTTCTGCAGGCTGCTTACGGTTT | 187 |
| gb:MN996527 | Organism:Severe | ATTACTGTCGTTGACAGGACACGAGTAACTCGTCTATCTTCTGCAGGCTGCTTACGGTTT | 169 |
| gb:MT093631 | Organism:Severe | ATTACTGTCGTTGACAGGACACGAGTAACTCGTCTATCTTCTGCAGGCTGCTTACGGTTT | 240 |
| gb:MT106053 | Organism:Severe | ATTACTGTCGTTGACAGGACACGAGTAACTCGTCTATCTTCTGCAGGCTGCTTACGGTTT | 202 |
| gb:MT019533 | Organism:Severe | ATTACTGTCGTTGACAGGACACGAGTAACTCGTCTATCTTCTGCAGGCTGCTTACGGTTT | 202 |
| gb:MT019531 | Organism:Severe | ATTACTGTCGTTGACAGGACACGAGTAACTCGTCTATCTTCTGCAGGCTGCTTACGGTTT | 202 |
| gb:MN996528 | Organism:Severe | ATTACTGTCGTTGACAGGACACGAGTAACTCGTCTATCTTCTGCAGGCTGCTTACGGTTT | 202 |
| gb:MN996530 | Organism:Severe | ATTACTGTCGTTGACAGGACACGAGTAACTCGTCTATCTTCTGCAGGCTGCTTACGGTTT | 188 |
| gb:MN908947 | Organism:Severe | ATTACTGTCGTTGACAGGACACGAGTAACTCGTCTATCTTCTGCAGGCTGCTTACGGTTT | 202 |
| gb:MT019532 | Organism:Severe | ATTACTGTCGTTGACAGGACACGAGTAACTCGTCTATCTTCTGCAGGCTGCTTACGGTTT | 202 |

\*\*\*\*\*

|             |                 |                                                              |     |
|-------------|-----------------|--------------------------------------------------------------|-----|
| gb:MT020781 | Organism:Severe | CGTCCGTGTTGCAGCCGATCATCAGCACATCTAGGTTTCGTCCGGGTGTGACCGAAAGGT | 250 |
| gb:MT007544 | Organism:Severe | CGTCCGTGTTGCAGCCGATCATCAGCACATCTAGGTTTCGTCCGGGTGTGACCGAAAGGT | 262 |
| gb:MN994467 | Organism:Severe | CGTCCGTGTTGCAGCCGATCATCAGCACATCTAGGTTTCGTCCGGGTGTGACCGAAAGGT | 262 |
| gb:MT044257 | Organism:Severe | CGTCCGTGTTGCAGCCGATCATCAGCACATCTAGGTTTCGTCCGGGTGTGACCGAAAGGT | 262 |
| gb:MT106054 | Organism:Severe | CGTCCGTGTTGCAGCCGATCATCAGCACATCTAGGTTTCGTCCGGGTGTGACCGAAAGGT | 262 |
| gb:MT049951 | Organism:Severe | CGTCCGTGTTGCAGCCGATCATCAGCACATCTAGGTTTCGTCCGGGTGTGACCGAAAGGT | 262 |
| gb:MN975262 | Organism:Severe | CGTCCGTGTTGCAGCCGATCATCAGCACATCTAGGTTTCGTCCGGGTGTGACCGAAAGGT | 262 |

|             |                 |                                                               |     |
|-------------|-----------------|---------------------------------------------------------------|-----|
| gb:MT106052 | Organism:Severe | CGTCCGTGTTGCAGCCGATCATCAGCACATCTAGGTTTCGTCCGGGTGTGACC GAAAGGT | 262 |
| gb:LC522975 | Organism:Severe | CGTCCGTGTTGCAGCCGATCATCAGCACATCTAGGTTTCGTCCGGGTGTGACC GAAAGGT | 259 |
| gb:LC522973 | Organism:Severe | CGTCCGTGTTGCAGCCGATCATCAGCACATCTAGGTTTCGTCCGGGTGTGACC GAAAGGT | 259 |
| gb:LC522974 | Organism:Severe | CGTCCGTGTTGCAGCCGATCATCAGCACATCTAGGTTTCGTCCGGGTGTGACC GAAAGGT | 259 |
| gb:MN985325 | Organism:Severe | CGTCCGTGTTGCAGCCGATCATCAGCACATCTAGGTTTCGTCCGGGTGTGACC GAAAGGT | 262 |
| gb:MT020881 | Organism:Severe | CGTCCGTGTTGCAGCCGATCATCAGCACATCTAGGTTTCGTCCGGGTGTGACC GAAAGGT | 262 |
| gb:MT020880 | Organism:Severe | CGTCCGTGTTGCAGCCGATCATCAGCACATCTAGGTTTCGTCCGGGTGTGACC GAAAGGT | 262 |
| gb:MT066175 | Organism:Severe | CGTCCGTGTTGCAGCCGATCATCAGCACATCTAGGTTTCGTCCGGGTGTGACC GAAAGGT | 262 |
| gb:MN997409 | Organism:Severe | CGTCCGTGTTGCAGCCGATCATCAGCACATCTAGGTTTCGTCCGGGTGTGACC GAAAGGT | 262 |
| gb:MN938384 | Organism:Severe | CGTCCGTGTTGCAGCCGATCATCAGCACATCTAGGTTTCGTCCGGGTGTGACC GAAAGGT | 230 |
| gb:MT044258 | Organism:Severe | CGTCCGTGTTGCAGCCGATCATCAGCACATCTAGGTTTCGTCCGGGTGTGACC GAAAGGT | 262 |
| gb:MT039890 | Organism:Severe | CGTCCGTGTTGCAGCCGATCATCAGCACATCTAGGTTTCGTCCGGGTGTGACC GAAAGGT | 262 |
| gb:MN988713 | Organism:Severe | CGTCCGTGTTGCAGCCGATCATCAGCACATCTAGGTTTCGTCCGGGTGTGACC GAAAGGT | 262 |
| gb:LC521925 | Organism:Severe | CGTCCGTGTTGCAGCCGATCATCAGCACATCTAGGTTTCGTCCGGGTGTGACC GAAAGGT | 259 |
| gb:MT093571 | Organism:Severe | CGTCCGTGTTGCAGCCGATCATCAGCACATCTAGGTTTCGTCCGGGTGTGACC GAAAGGT | 262 |
| gb:MT039887 | Organism:Severe | CGTCCGTGTTGCAGCCGATCATCAGCACATCTAGGTTTCGTCCGGGTGTGACC GAAAGGT | 262 |
| gb:MT019530 | Organism:Severe | CGTCCGTGTTGCAGCCGATCATCAGCACATCTAGGTTTCGTCCGGGTGTGACC GAAAGGT | 262 |
| gb:MT039888 | Organism:Severe | CGTCCGTGTTGCAGCCGATCATCAGCACATCTAGGTTTCGTCCGGGTGTGACC GAAAGGT | 262 |
| gb:LC522972 | Organism:Severe | CGTCCGTGTTGCAGCCGATCATCAGCACATCTAGGTTTCGTCCGGGTGTGACC GAAAGGT | 259 |
| gb:MT027063 | Organism:Severe | CGTCCGTGTTGCAGCCGATCATCAGCACATCTAGGTTTCGTCCGGGTGTGACC GAAAGGT | 262 |
| gb:MT027062 | Organism:Severe | CGTCCGTGTTGCAGCCGATCATCAGCACATCTAGGTTTCGTCCGGGTGTGACC GAAAGGT | 262 |
| gb:MT019529 | Organism:Severe | CGTCCGTGTTGCAGCCGATCATCAGCACATCTAGGTTTCGTCCGGGTGTGACC GAAAGGT | 262 |
| gb:MN996529 | Organism:Severe | CGTCCGTGTTGCAGCCGATCATCAGCACATCTAGGTTTCGTCCGGGTGTGACC GAAAGGT | 250 |
| gb:MN996531 | Organism:Severe | CGTCCGTGTTGCAGCCGATCATCAGCACATCTAGGTTTCGTCCGGGTGTGACC GAAAGGT | 249 |
| gb:MT066176 | Organism:Severe | CGTCCGTGTTGCAGCCGATCATCAGCACATCTAGGTTTCGTCCGGGTGTGACC GAAAGGT | 262 |
| gb:MT027064 | Organism:Severe | CGTCCGTGTTGCAGCCGATCATCAGCACATCTAGGTTTCGTCCGGGTGTGACC GAAAGGT | 262 |
| gb:MN994468 | Organism:Severe | CGTCCGTGTTGCAGCCGATCATCAGCACATCTAGGTTTCGTCCGGGTGTGACC GAAAGGT | 262 |
| gb:MT072688 | Organism:Severe | CGTCCGTGTTGCAGCCGATCATCAGCACATCTAGGTTTCGTCCGGGTGTGACC GAAAGGT | 247 |
| gb:MN996527 | Organism:Severe | CGTCCGTGTTGCAGCCGATCATCAGCACATCTAGGTTTCGTCCGGGTGTGACC GAAAGGT | 229 |
| gb:MT093631 | Organism:Severe | CGTCCGTGTTGCAGCCGATCATCAGCACATCTAGGTTTCGTCCGGGTGTGACC GAAAGGT | 300 |
| gb:MT106053 | Organism:Severe | CGTCCGTGTTGCAGCCGATCATCAGCACATCTAGGTTTCGTCCGGGTGTGACC GAAAGGT | 262 |
| gb:MT019533 | Organism:Severe | CGTCCGTGTTGCAGCCGATCATCAGCACATCTAGGTTTCGTCCGGGTGTGACC GAAAGGT | 262 |
| gb:MT019531 | Organism:Severe | CGTCCGTGTTGCAGCCGATCATCAGCACATCTAGGTTTCGTCCGGGTGTGACC GAAAGGT | 262 |
| gb:MN996528 | Organism:Severe | CGTCCGTGTTGCAGCCGATCATCAGCACATCTAGGTTTCGTCCGGGTGTGACC GAAAGGT | 262 |
| gb:MN996530 | Organism:Severe | CGTCCGTGTTGCAGCCGATCATCAGCACATCTAGGTTTCGTCCGGGTGTGACC GAAAGGT | 248 |
| gb:MN908947 | Organism:Severe | CGTCCGTGTTGCAGCCGATCATCAGCACATCTAGGTTTCGTCCGGGTGTGACC GAAAGGT | 262 |
| gb:MT019532 | Organism:Severe | CGTCCGTGTTGCAGCCGATCATCAGCACATCTAGGTTTCGTCCGGGTGTGACC GAAAGGT | 262 |

\*\*\*\*\*

|             |                 |                                                                |     |
|-------------|-----------------|----------------------------------------------------------------|-----|
| gb:MT020781 | Organism:Severe | AAGATGGAGAGCCTTGTCCCTGGTTTCAACGAGAAAAACACACGTCCA ACTCAGTTTGCTT | 310 |
| gb:MT007544 | Organism:Severe | AAGATGGAGAGCCTTGTCCCTGGTTTCAACGAGAAAAACACACGTCCA ACTCAGTTTGCTT | 322 |
| gb:MN994467 | Organism:Severe | AAGATGGAGAGCCTTGTCCCTGGTTTCAACGAGAAAAACACACGTCCA ACTCAGTTTGCTT | 322 |
| gb:MT044257 | Organism:Severe | AAGATGGAGAGCCTTGTCCCTGGTTTCAACGAGAAAAACACACGTCCA ACTCAGTTTGCTT | 322 |
| gb:MT106054 | Organism:Severe | AAGATGGAGAGCCTTGTCCCTGGTTTCAACGAGAAAAACACACGTCCA ACTCAGTTTGCTT | 322 |
| gb:MT049951 | Organism:Severe | AAGATGGAGAGCCTTGTCCCTGGTTTCAACGAGAAAAACACACGTCCA ACTCAGTTTGCTT | 322 |
| gb:MN975262 | Organism:Severe | AAGATGGAGAGCCTTGTCCCTGGTTTCAACGAGAAAAACACACGTCCA ACTCAGTTTGCTT | 322 |
| gb:MT106052 | Organism:Severe | AAGATGGAGAGCCTTGTCCCTGGTTTCAACGAGAAAAACACACGTCCA ACTCAGTTTGCTT | 322 |
| gb:LC522975 | Organism:Severe | AAGATGGAGAGCCTTGTCCCTGGTTTCAACGAGAAAAACACACGTCCA ACTCAGTTTGCTT | 319 |
| gb:LC522973 | Organism:Severe | AAGATGGAGAGCCTTGTCCCTGGTTTCAACGAGAAAAACACACGTCCA ACTCAGTTTGCTT | 319 |
| gb:LC522974 | Organism:Severe | AAGATGGAGAGCCTTGTCCCTGGTTTCAACGAGAAAAACACACGTCCA ACTCAGTTTGCTT | 319 |
| gb:MN985325 | Organism:Severe | AAGATGGAGAGCCTTGTCCCTGGTTTCAACGAGAAAAACACACGTCCA ACTCAGTTTGCTT | 322 |
| gb:MT020881 | Organism:Severe | AAGATGGAGAGCCTTGTCCCTGGTTTCAACGAGAAAAACACACGTCCA ACTCAGTTTGCTT | 322 |
| gb:MT020880 | Organism:Severe | AAGATGGAGAGCCTTGTCCCTGGTTTCAACGAGAAAAACACACGTCCA ACTCAGTTTGCTT | 322 |
| gb:MT066175 | Organism:Severe | AAGATGGAGAGCCTTGTCCCTGGTTTCAACGAGAAAAACACACGTCCA ACTCAGTTTGCTT | 322 |
| gb:MN997409 | Organism:Severe | AAGATGGAGAGCCTTGTCCCTGGTTTCAACGAGAAAAACACACGTCCA ACTCAGTTTGCTT | 322 |
| gb:MN938384 | Organism:Severe | AAGATGGAGAGCCTTGTCCCTGGTTTCAACGAGAAAAACACACGTCCA ACTCAGTTTGCTT | 290 |
| gb:MT044258 | Organism:Severe | AAGATGGAGAGCCTTGTCCCTGGTTTCAACGAGAAAAACACACGTCCA ACTCAGTTTGCTT | 322 |
| gb:MT039890 | Organism:Severe | AAGATGGAGAGCCTTGTCCCTGGTTTCAACGAGAAAAACACACGTCCA ACTCAGTTTGCTT | 322 |
| gb:MN988713 | Organism:Severe | AAGATGGAGAGCCTTGTCCCTGGTTTCAACGAGAAAAACACACGTCCA ACTCAGTTTGCTT | 322 |
| gb:LC521925 | Organism:Severe | AAGATGGAGAGCCTTGTCCCTGGTTTCAACGAGAAAAACACACGTCCA ACTCAGTTTGCTT | 319 |
| gb:MT093571 | Organism:Severe | AAGATGGAGAGCCTTGTCCCTGGTTTCAACGAGAAAAACACACGTCCA ACTCAGTTTGCTT | 322 |
| gb:MT039887 | Organism:Severe | AAGATGGAGAGCCTTGTCCCTGGTTTCAACGAGAAAAACACACGTCCA ACTCAGTTTGCTT | 322 |
| gb:MT019530 | Organism:Severe | AAGATGGAGAGCCTTGTCCCTGGTTTCAACGAGAAAAACACACGTCCA ACTCAGTTTGCTT | 322 |
| gb:MT039888 | Organism:Severe | AAGATGGAGAGCCTTGTCCCTGGTTTCAACGAGAAAAACACACGTCCA ACTCAGTTTGCTT | 322 |
| gb:LC522972 | Organism:Severe | AAGATGGAGAGCCTTGTCCCTGGTTTCAACGAGAAAAACACACGTCCA ACTCAGTTTGCTT | 319 |

```

gb:MT027063|Organism:Severe      AAGATGGAGAGCCTTGTCCCTGGTTTCAACGAGAAAAACACACGTCCAACCTCAGTTTGCTT 322
gb:MT027062|Organism:Severe      AAGATGGAGAGCCTTGTCCCTGGTTTCAACGAGAAAAACACACGTCCAACCTCAGTTTGCTT 322
gb:MT019529|Organism:Severe      AAGATGGAGAGCCTTGTCCCTGGTTTCAACGAGAAAAACACACGTCCAACCTCAGTTTGCTT 322
gb:MN996529|Organism:Severe      AAGATGGAGAGCCTTGTCCCTGGTTTCAACGAGAAAAACACACGTCCAACCTCAGTTTGCTT 310
gb:MN996531|Organism:Severe      AAGATGGAGAGCCTTGTCCCTGGTTTCAACGAGAAAAACACACGTCCAACCTCAGTTTGCTT 309
gb:MT066176|Organism:Severe      AAGATGGAGAGCCTTGTCCCTGGTTTCAACGAGAAAAACACACGTCCAACCTCAGTTTGCTT 322
gb:MT027064|Organism:Severe      AAGATGGAGAGCCTTGTCCCTGGTTTCAACGAGAAAAACACACGTCCAACCTCAGTTTGCTT 322
gb:MN994468|Organism:Severe      AAGATGGAGAGCCTTGTCCCTGGTTTCAACGAGAAAAACACACGTCCAACCTCAGTTTGCTT 322
gb:MT072688|Organism:Severe      AAGATGGAGAGCCTTGTCCCTGGTTTCAACGAGAAAAACACACGTCCAACCTCAGTTTGCTT 307
gb:MN996527|Organism:Severe      AAGATGGAGAGCCTTGTCCCTGGTTTCAACGAGAAAAACACACGTCCAACCTCAGTTTGCTT 289
gb:MT093631|Organism:Severe      AAGATGGAGAGCCTTGTCCCTGGTTTCAACGAGAAAAACACACGTCCAACCTCAGTTTGCTT 360
gb:MT106053|Organism:Severe      AAGATGGAGAGCCTTGTCCCTGGTTTCAACGAGAAAAACACACGTCCAACCTCAGTTTGCTT 322
gb:MT019533|Organism:Severe      AAGATGGAGAGCCTTGTCCCTGGTTTCAACGAGAAAAACACACGTCCAACCTCAGTTTGCTT 322
gb:MT019531|Organism:Severe      AAGATGGAGAGCCTTGTCCCTGGTTTCAACGAGAAAAACACACGTCCAACCTCAGTTTGCTT 322
gb:MN996528|Organism:Severe      AAGATGGAGAGCCTTGTCCCTGGTTTCAACGAGAAAAACACACGTCCAACCTCAGTTTGCTT 322
gb:MN996530|Organism:Severe      AAGATGGAGAGCCTTGTCCCTGGTTTCAACGAGAAAAACACACGTCCAACCTCAGTTTGCTT 308
gb:MN908947|Organism:Severe      AAGATGGAGAGCCTTGTCCCTGGTTTCAACGAGAAAAACACACGTCCAACCTCAGTTTGCTT 322
gb:MT019532|Organism:Severe      AAGATGGAGAGCCTTGTCCCTGGTTTCAACGAGAAAAACACACGTCCAACCTCAGTTTGCTT 322
*****

```

```

gb:MT020781|Organism:Severe      GTTTTACAGGTTTCGCGACGTGCTCGTACGTGGCTTTGGAGACTCCGTGGAGGAGGTCTTA 370
gb:MT007544|Organism:Severe      GTTTTACAGGTTTCGCGACGTGCTCGTACGTGGCTTTGGAGACTCCGTGGAGGAGGTCTTA 382
gb:MN994467|Organism:Severe      GTTTTACAGGTTTCGCGACGTGCTCGTACGTGGCTTTGGAGACTCCGTGGAGGAGGTCTTA 382
gb:MT044257|Organism:Severe      GTTTTACAGGTTTCGCGACGTGCTCGTACGTGGCTTTGGAGACTCCGTGGAGGAGGTCTTA 382
gb:MT106054|Organism:Severe      GTTTTACAGGTTTCGCGACGTGCTCGTACGTGGCTTTGGAGACTCCGTGGAGGAGGTCTTA 382
gb:MT049951|Organism:Severe      GTTTTACAGGTTTCGCGACGTGCTCGTACGTGGCTTTGGAGACTCCGTGGAGGAGGTCTTA 382
gb:MN975262|Organism:Severe      GTTTTACAGGTTTCGCGACGTGCTCGTACGTGGCTTTGGAGACTCCGTGGAGGAGGTCTTA 382
gb:MT106052|Organism:Severe      GTTTTACAGGTTTCGCGACGTGCTCGTACGTGGCTTTGGAGACTCCGTGGAGGAGGTCTTA 382
gb:LC522975|Organism:Severe      GTTTTACAGGTTTCGCGACGTGCTCGTACGTGGCTTTGGAGACTCCGTGGAGGAGGTCTTA 379
gb:LC522973|Organism:Severe      GTTTTACAGGTTTCGCGACGTGCTCGTACGTGGCTTTGGAGACTCCGTGGAGGAGGTCTTA 379
gb:LC522974|Organism:Severe      GTTTTACAGGTTTCGCGACGTGCTCGTACGTGGCTTTGGAGACTCCGTGGAGGAGGTCTTA 379
gb:MN985325|Organism:Severe      GTTTTACAGGTTTCGCGACGTGCTCGTACGTGGCTTTGGAGACTCCGTGGAGGAGGTCTTA 382
gb:MT020881|Organism:Severe      GTTTTACAGGTTTCGCGACGTGCTCGTACGTGGCTTTGGAGACTCCGTGGAGGAGGTCTTA 382
gb:MT020880|Organism:Severe      GTTTTACAGGTTTCGCGACGTGCTCGTACGTGGCTTTGGAGACTCCGTGGAGGAGGTCTTA 382
gb:MT066175|Organism:Severe      GTTTTACAGGTTTCGCGACGTGCTCGTACGTGGCTTTGGAGACTCCGTGGAGGAGGTCTTA 382
gb:MN997409|Organism:Severe      GTTTTACAGGTTTCGCGACGTGCTCGTACGTGGCTTTGGAGACTCCGTGGAGGAGGTCTTA 382
gb:MN938384|Organism:Severe      GTTTTACAGGTTTCGCGACGTGCTCGTACGTGGCTTTGGAGACTCCGTGGAGGAGGTCTTA 350
gb:MT044258|Organism:Severe      GTTTTACAGGTTTCGCGACGTGCTCGTACGTGGCTTTGGAGACTCCGTGGAGGAGGTCTTA 382
gb:MT039890|Organism:Severe      GTTTTACAGGTTTCGCGACGTGCTCGTACGTGGCTTTGGAGACTCCGTGGAGGAGGTCTTA 382
gb:MN988713|Organism:Severe      GTTTTACAGGTTTCGCGACGTGCTCGTACGTGGCTTTGGAGACTCCGTGGAGGAGGTCTTA 382
gb:LC521925|Organism:Severe      GTTTTACAGGTTTCGCGACGTGCTCGTACGTGGCTTT----- 355
gb:MT093571|Organism:Severe      GTTTTACAGGTTTCGCGACGTGCTCGTACGTGGCTTTGGAGACTCCGTGGAGGAGGTCTTA 382
gb:MT039887|Organism:Severe      GTTTTACAGGTTTCGCGACGTGCTCGTACGTGGCTTTGGAGACTCCGTGGAGGAGGTCTTA 382
gb:MT019530|Organism:Severe      GTTTTACAGGTTTCGCGACGTGCTCGTACGTGGCTTTGGAGACTCCGTGGAGGAGGTCTTA 382
gb:MT039888|Organism:Severe      GTTTTACAGGTTTCGCGACGTGCTCGTACGTGGCTTTGGAGACTCCGTGGAGGAGGTCTTA 382
gb:LC522972|Organism:Severe      GTTTTACAGGTTTCGCGACGTGCTCGTACGTGGCTTTGGAGACTCCGTGGAGGAGGTCTTA 379
gb:MT027063|Organism:Severe      GTTTTACAGGTTTCGCGACGTGCTCGTACGTGGCTTTGGAGACTCCGTGGAGGAGGTCTTA 382
gb:MT027062|Organism:Severe      GTTTTACAGGTTTCGCGACGTGCTCGTACGTGGCTTTGGAGACTCCGTGGAGGAGGTCTTA 382
gb:MT019529|Organism:Severe      GTTTTACAGGTTTCGCGACGTGCTCGTACGTGGCTTTGGAGACTCCGTGGAGGAGGTCTTA 382
gb:MN996529|Organism:Severe      GTTTTACAGGTTTCGCGACGTGCTCGTACGTGGCTTTGGAGACTCCGTGGAGGAGGTCTTA 370
gb:MN996531|Organism:Severe      GTTTTACAGGTTTCGCGACGTGCTCGTACGTGGCTTTGGAGACTCCGTGGAGGAGGTCTTA 369
gb:MT066176|Organism:Severe      GTTTTACAGGTTTCGCGACGTGCTCGTACGTGGCTTTGGAGACTCCGTGGAGGAGGTCTTA 382
gb:MT027064|Organism:Severe      GTTTTACAGGTTTCGCGACGTGCTCGTACGTGGCTTTGGAGACTCCGTGGAGGAGGTCTTA 382
gb:MN994468|Organism:Severe      GTTTTACAGGTTTCGCGACGTGCTCGTACGTGGCTTTGGAGACTCCGTGGAGGAGGTCTTA 382
gb:MT072688|Organism:Severe      GTTTTACAGGTTTCGCGACGTGCTCGTACGTGGCTTTGGAGACTCCGTGGAGGAGGTCTTA 367
gb:MN996527|Organism:Severe      GTTTTACAGGTTTCGCGACGTGCTCGTACGTGGCTTTGGAGACTCCGTGGAGGAGGTCTTA 349
gb:MT093631|Organism:Severe      GTTTTACAGGTTTCGCGACGTGCTCGTACGTGGCTTTGGAGACTCCGTGGAGGAGGTCTTA 420
gb:MT106053|Organism:Severe      GTTTTACAGGTTTCGCGACGTGCTCGTACGTGGCTTTGGAGACTCCGTGGAGGAGGTCTTA 382
gb:MT019533|Organism:Severe      GTTTTACAGGTTTCGCGACGTGCTCGTACGTGGCTTTGGAGACTCCGTGGAGGAGGTCTTA 382
gb:MT019531|Organism:Severe      GTTTTACAGGTTTCGCGACGTGCTCGTACGTGGCTTTGGAGACTCCGTGGAGGAGGTCTTA 382
gb:MN996528|Organism:Severe      GTTTTACAGGTTTCGCGACGTGCTCGTACGTGGCTTTGGAGACTCCGTGGAGGAGGTCTTA 382
gb:MN996530|Organism:Severe      GTTTTACAGGTTTCGCGACGTGCTCGTACGTGGCTTTGGAGACTCCGTGGAGGAGGTCTTA 368
gb:MN908947|Organism:Severe      GTTTTACAGGTTTCGCGACGTGCTCGTACGTGGCTTTGGAGACTCCGTGGAGGAGGTCTTA 382
gb:MT019532|Organism:Severe      GTTTTACAGGTTTCGCGACGTGCTCGTACGTGGCTTTGGAGACTCCGTGGAGGAGGTCTTA 382
*****

```

|             |                 |                                                              |     |
|-------------|-----------------|--------------------------------------------------------------|-----|
| gb:MT020781 | Organism:Severe | TCAGAGGCACGTCAACATCTTAAAGATGGCACTTGTGGCTTAGTAGAAGTTGAAAAAGGC | 430 |
| gb:MT007544 | Organism:Severe | TCAGAGGCACGTCAACATCTTAAAGATGGCACTTGTGGCTTAGTAGAAGTTGAAAAAGGC | 442 |
| gb:MN994467 | Organism:Severe | TCAGAGGCACGTCAACATCTTAAAGATGGCACTTGTGGCTTAGTAGAAGTTGAAAAAGGC | 442 |
| gb:MT044257 | Organism:Severe | TCAGAGGCACGTCAACATCTTAAAGATGGCACTTGTGGCTTAGTAGAAGTTGAAAAAGGC | 442 |
| gb:MT106054 | Organism:Severe | TCAGAGGCACGTCAACATCTTAAAGATGGCACTTGTGGCTTAGTAGAAGTTGAAAAAGGC | 442 |
| gb:MT049951 | Organism:Severe | TCAGAGGCACGTCAACATCTTAAAGATGGCACTTGTGGCTTAGTAGAAGTTGAAAAAGGC | 442 |
| gb:MN975262 | Organism:Severe | TCAGAGGCACGTCAACATCTTAAAGATGGCACTTGTGGCTTAGTAGAAGTTGAAAAAGGC | 442 |
| gb:MT106052 | Organism:Severe | TCAGAGGCACGTCAACATCTTAAAGATGGCACTTGTGGCTTAGTAGAAGTTGAAAAAGGC | 442 |
| gb:LC522975 | Organism:Severe | TCAGAGGCACGTCAACATCTTAAAGATGGCACTTGTGGCTTAGTAGAAGTTGAAAAAGGC | 439 |
| gb:LC522973 | Organism:Severe | TCAGAGGCACGTCAACATCTTAAAGATGGCACTTGTGGCTTAGTAGAAGTTGAAAAAGGC | 439 |
| gb:LC522974 | Organism:Severe | TCAGAGGCACGTCAACATCTTAAAGATGGCACTTGTGGCTTAGTAGAAGTTGAAAAAGGC | 439 |
| gb:MN985325 | Organism:Severe | TCAGAGGCACGTCAACATCTTAAAGATGGCACTTGTGGCTTAGTAGAAGTTGAAAAAGGC | 442 |
| gb:MT020881 | Organism:Severe | TCAGAGGCACGTCAACATCTTAAAGATGGCACTTGTGGCTTAGTAGAAGTTGAAAAAGGC | 442 |
| gb:MT020880 | Organism:Severe | TCAGAGGCACGTCAACATCTTAAAGATGGCACTTGTGGCTTAGTAGAAGTTGAAAAAGGC | 442 |
| gb:MT066175 | Organism:Severe | TCAGAGGCACGTCAACATCTTAAAGATGGCACTTGTGGCTTAGTAGAAGTTGAAAAAGGC | 442 |
| gb:MN997409 | Organism:Severe | TCAGAGGCACGTCAACATCTTAAAGATGGCACTTGTGGCTTAGTAGAAGTTGAAAAAGGC | 442 |
| gb:MN938384 | Organism:Severe | TCAGAGGCACGTCAACATCTTAAAGATGGCACTTGTGGCTTAGTAGAAGTTGAAAAAGGC | 410 |
| gb:MT044258 | Organism:Severe | TCAGAGGCACGTCAACATCTTAAAGATGGCACTTGTGGCTTAGTAGAAGTTGAAAAAGGC | 442 |
| gb:MT039890 | Organism:Severe | TCAGAGGCACGTCAACATCTTAAAGATGGCACTTGTGGCTTAGTAGAAGTTGAAAAAGGC | 442 |
| gb:MN988713 | Organism:Severe | TCAGAGGCACGTCAACATCTTAAAGATGGCACTTGTGGCTTAGTAGAAGTTGAAAAAGGC | 442 |
| gb:LC521925 | Organism:Severe | TCAGAGGCACGTCAACATCTTAAAGATGGCACTTGTGGCTTAGTAGAAGTTGAAAAAGGC | 415 |
| gb:MT093571 | Organism:Severe | TCAGAGGCACGTCAACATCTTAAAGATGGCACTTGTGGCTTAGTAGAAGTTGAAAAAGGC | 442 |
| gb:MT039887 | Organism:Severe | TCAGAGGCACGTCAACATCTTAAAGATGGCACTTGTGGCTTAGTAGAAGTTGAAAAAGGC | 442 |
| gb:MT019530 | Organism:Severe | TCAGAGGCACGTCAACATCTTAAAGATGGCACTTGTGGCTTAGTAGAAGTTGAAAAAGGC | 442 |
| gb:MT039888 | Organism:Severe | TCAGAGGCACGTCAACATCTTAAAGATGGCACTTGTGGCTTAGTAGAAGTTGAAAAAGGC | 442 |
| gb:LC522972 | Organism:Severe | TCAGAGGCACGTCAACATCTTAAAGATGGCACTTGTGGCTTAGTAGAAGTTGAAAAAGGC | 439 |
| gb:MT027063 | Organism:Severe | TCAGAGGCACGTCAACATCTTAAAGATGGCACTTGTGGCTTAGTAGAAGTTGAAAAAGGC | 442 |
| gb:MT027062 | Organism:Severe | TCAGAGGCACGTCAACATCTTAAAGATGGCACTTGTGGCTTAGTAGAAGTTGAAAAAGGC | 442 |
| gb:MT019529 | Organism:Severe | TCAGAGGCACGTCAACATCTTAAAGATGGCACTTGTGGCTTAGTAGAAGTTGAAAAAGGC | 442 |
| gb:MN996529 | Organism:Severe | TCAGAGGCACGTCAACATCTTAAAGATGGCACTTGTGGCTTAGTAGAAGTTGAAAAAGGC | 430 |
| gb:MN996531 | Organism:Severe | TCAGAGGCACGTCAACATCTTAAAGATGGCACTTGTGGCTTAGTAGAAGTTGAAAAAGGC | 429 |
| gb:MT066176 | Organism:Severe | TCAGAGGCACGTCAACATCTTAAAGATGGCACTTGTGGCTTAGTAGAAGTTGAAAAAGGC | 442 |
| gb:MT027064 | Organism:Severe | TCAGAGGCACGTCAACATCTTAAAGATGGCACTTGTGGCTTAGTAGAAGTTGAAAAAGGC | 442 |
| gb:MN994468 | Organism:Severe | TCAGAGGCACGTCAACATCTTAAAGATGGCACTTGTGGCTTAGTAGAAGTTGAAAAAGGC | 442 |
| gb:MT072688 | Organism:Severe | TCAGAGGCACGTCAACATCTTAAAGATGGCACTTGTGGCTTAGTAGAAGTTGAAAAAGGC | 427 |
| gb:MN996527 | Organism:Severe | TCAGAGGCACGTCAACATCTTAAAGATGGCACTTGTGGCTTAGTAGAAGTTGAAAAAGGC | 409 |
| gb:MT093631 | Organism:Severe | TCAGAGGCACGTCAACATCTTAAAGATGGCACTTGTGGCTTAGTAGAAGTTGAAAAAGGC | 480 |
| gb:MT106053 | Organism:Severe | TCAGAGGCACGTCAACATCTTAAAGATGGCACTTGTGGCTTAGTAGAAGTTGAAAAAGGC | 442 |
| gb:MT019533 | Organism:Severe | TCAGAGGCACGTCAACATCTTAAAGATGGCACTTGTGGCTTAGTAGAAGTTGAAAAAGGC | 442 |
| gb:MT019531 | Organism:Severe | TCAGAGGCACGTCAACATCTTAAAGATGGCACTTGTGGCTTAGTAGAAGTTGAAAAAGGC | 442 |
| gb:MN996528 | Organism:Severe | TCAGAGGCACGTCAACATCTTAAAGATGGCACTTGTGGCTTAGTAGAAGTTGAAAAAGGC | 442 |
| gb:MN996530 | Organism:Severe | TCAGAGGCACGTCAACATCTTAAAGATGGCACTTGTGGCTTAGTAGAAGTTGAAAAAGGC | 428 |
| gb:MN908947 | Organism:Severe | TCAGAGGCACGTCAACATCTTAAAGATGGCACTTGTGGCTTAGTAGAAGTTGAAAAAGGC | 442 |
| gb:MT019532 | Organism:Severe | TCAGAGGCACGTCAACATCTTAAAGATGGCACTTGTGGCTTAGTAGAAGTTGAAAAAGGC | 442 |

\*\*\*\*\*

|             |                 |                                                               |     |
|-------------|-----------------|---------------------------------------------------------------|-----|
| gb:MT020781 | Organism:Severe | GTTTTGCCTCAACTTGAACAGCCCTATGTGTTTCATCAAACGTTCCGATGCTCGAACTGCA | 490 |
| gb:MT007544 | Organism:Severe | GTTTTGCCTCAACTTGAACAGCCCTATGTGTTTCATCAAACGTTCCGATGCTCGAACTGCA | 502 |
| gb:MN994467 | Organism:Severe | GTTTTGCCTCAACTTGAACAGCCCTATGTGTTTCATCAAACGTTCCGATGCTCGAACTGCA | 502 |
| gb:MT044257 | Organism:Severe | GTTTTGCCTCAACTTGAACAGCCCTATGTGTTTCATCAAACGTTCCGATGCTCGAACTGCA | 502 |
| gb:MT106054 | Organism:Severe | GTTTTGCCTCAACTTGAACAGCCCTATGTGTTTCATCAAACGTTCCGATGCTCGAACTGCA | 502 |
| gb:MT049951 | Organism:Severe | GTTTTGCCTCAACTTGAACAGCCCTATGTGTTTCATCAAACGTTCCGATGCTCGAACTGCA | 502 |
| gb:MN975262 | Organism:Severe | GTTTTGCCTCAACTTGAACAGCCCTATGTGTTTCATCAAACGTTCCGATGCTCGAACTGCA | 502 |
| gb:MT106052 | Organism:Severe | GTTTTGCCTCAACTTGAACAGCCCTATGTGTTTCATCAAACGTTCCGATGCTCGAACTGCA | 502 |
| gb:LC522975 | Organism:Severe | GTTTTGCCTCAACTTGAACAGCCCTATGTGTTTCATCAAACGTTCCGATGCTCGAACTGCA | 499 |
| gb:LC522973 | Organism:Severe | GTTTTGCCTCAACTTGAACAGCCCTATGTGTTTCATCAAACGTTCCGATGCTCGAACTGCA | 499 |
| gb:LC522974 | Organism:Severe | GTTTTGCCTCAACTTGAACAGCCCTATGTGTTTCATCAAACGTTCCGATGCTCGAACTGCA | 499 |
| gb:MN985325 | Organism:Severe | GTTTTGCCTCAACTTGAACAGCCCTATGTGTTTCATCAAACGTTCCGATGCTCGAACTGCA | 502 |
| gb:MT020881 | Organism:Severe | GTTTTGCCTCAACTTGAACAGCCCTATGTGTTTCATCAAACGTTCCGATGCTCGAACTGCA | 502 |
| gb:MT020880 | Organism:Severe | GTTTTGCCTCAACTTGAACAGCCCTATGTGTTTCATCAAACGTTCCGATGCTCGAACTGCA | 502 |
| gb:MT066175 | Organism:Severe | GTTTTGCCTCAACTTGAACAGCCCTATGTGTTTCATCAAACGTTCCGATGCTCGAACTGCA | 502 |
| gb:MN997409 | Organism:Severe | GTTTTGCCTCAACTTGAACAGCCCTATGTGTTTCATCAAACGTTCCGATGCTCGAACTGCA | 502 |
| gb:MN938384 | Organism:Severe | GTTTTGCCTCAACTTGAACAGCCCTATGTGTTTCATCAAACGTTCCGATGCTCGAACTGCA | 470 |
| gb:MT044258 | Organism:Severe | GTTTTGCCTCAACTTGAACAGCCCTATGTGTTTCATCAAACGTTCCGATGCTCGAACTGCA | 502 |

|             |                 |                                                               |     |
|-------------|-----------------|---------------------------------------------------------------|-----|
| gb:MT039890 | Organism:Severe | GTTTTGCCTCAACTGAAACAGCCCTATGTGTTTCATCAAACGTTCCGATGCTCGAACTGCA | 502 |
| gb:MN988713 | Organism:Severe | GTTTTGCCTCAACTGAAACAGCCCTATGTGTTTCATCAAACGTTCCGAWGCTCGAACTGCA | 502 |
| gb:LC521925 | Organism:Severe | GTTTTGCCTCAACTGAAACAGCCCTATGTGTTTCATCAAACGTTCCGATGCTCGAACTGCA | 475 |
| gb:MT093571 | Organism:Severe | GTTTTGCCTCAACTGAAACAGCCCTATGTGTTTCATCAAACGTTCCGATGCTCGAACTGCA | 502 |
| gb:MT039887 | Organism:Severe | GTTTTGCCTCAACTGAAACAGCCCTATGTGTTTCATCAAACGTTCCGATGCTCGAACTGCA | 502 |
| gb:MT019530 | Organism:Severe | GTTTTGCCTCAACTGAAACAGCCCTATGTGTTTCATCAAACGTTCCGATGCTCGAACTGCA | 502 |
| gb:MT039888 | Organism:Severe | GTTTTGCCTCAACTGAAACAGCCCTATGTGTTTCATCAAACGTTCCGATGCTCGAACTGCA | 502 |
| gb:LC522972 | Organism:Severe | GTTTTGCCTCAACTGAAACAGCCCTATGTGTTTCATCAAACGTTCCGATGCTCGAACTGCA | 499 |
| gb:MT027063 | Organism:Severe | GTTTTGCCTCAACTGAAACAGCCCTATGTGTTTCATCAAACGTTCCGATGCTCGAACTGCA | 502 |
| gb:MT027062 | Organism:Severe | GTTTTGCCTCAACTGAAACAGCCCTATGTGTTTCATCAAACGTTCCGATGCTCGAACTGCA | 502 |
| gb:MT019529 | Organism:Severe | GTTTTGCCTCAACTGAAACAGCCCTATGTGTTTCATCAAACGTTCCGATGCTCGAACTGCA | 502 |
| gb:MN996529 | Organism:Severe | GTTTTGCCTCAACTGAAACAGCCCTATGTGTTTCATCAAACGTTCCGATGCTCGAACTGCA | 490 |
| gb:MN996531 | Organism:Severe | GTTTTGCCTCAACTGAAACAGCCCTATGTGTTTCATCAAACGTTCCGATGCTCGAACTGCA | 489 |
| gb:MT066176 | Organism:Severe | GTTTTGCCTCAACTGAAACAGCCCTATGTGTTTCATCAAACGTTCCGATGCTCGAACTGCA | 502 |
| gb:MT027064 | Organism:Severe | GTTTTGCCTCAACTGAAACAGCCCTATGTGTTTCATCAAACGTTCCGATGCTCGAACTGCA | 502 |
| gb:MN994468 | Organism:Severe | GTTTTGCCTCAACTGAAACAGCCCTATGTGTTTCATCAAACGTTCCGATGCTCGAACTGCA | 502 |
| gb:MT072688 | Organism:Severe | GTTTTGCCTCAACTGAAACAGCCCTATGTGTTTCATCAAACGTTCCGATGCTCGAACTGCA | 487 |
| gb:MN996527 | Organism:Severe | GTTTTGCCTCAACTGAAACAGCCCTATGTGTTTCATCAAACGTTCCGATGCTCGAACTGCA | 469 |
| gb:MT093631 | Organism:Severe | GTTTTGCCTCAACTGAAACAGCCCTATGTGTTTCATCAAACGTTCCGATGCTCGAACTGCA | 540 |
| gb:MT106053 | Organism:Severe | GTTTTGCCTCAACTGAAACAGCCCTATGTGTTTCATCAAACGTTCCGATGCTCGAACTGCA | 502 |
| gb:MT019533 | Organism:Severe | GTTTTGCCTCAACTGAAACAGCCCTATGTGTTTCATCAAACGTTCCGATGCTCGAACTGCA | 502 |
| gb:MT019531 | Organism:Severe | GTTTTGCCTCAACTGAAACAGCCCTATGTGTTTCATCAAACGTTCCGATGCTCGAACTGCA | 502 |
| gb:MN996528 | Organism:Severe | GTTTTGCCTCAACTGAAACAGCCCTATGTGTTTCATCAAACGTTCCGATGCTCGAACTGCA | 502 |
| gb:MN996530 | Organism:Severe | GTTTTGCCTCAACTGAAACAGCCCTATGTGTTTCATCAAACGTTCCGATGCTCGAACTGCA | 488 |
| gb:MN908947 | Organism:Severe | GTTTTGCCTCAACTGAAACAGCCCTATGTGTTTCATCAAACGTTCCGATGCTCGAACTGCA | 502 |
| gb:MT019532 | Organism:Severe | GTTTTGCCTCAACTGAAACAGCCCTATGTGTTTCATCAAACGTTCCGATGCTCGAACTGCA | 502 |

\*\*\*\*\*

|             |                 |                                                              |     |
|-------------|-----------------|--------------------------------------------------------------|-----|
| gb:MT020781 | Organism:Severe | CCTCATGGTCATGTTATGGTTGAGCTGGTAGCAGAACTCGAAGGCATTAGTACGGTTCGT | 550 |
| gb:MT007544 | Organism:Severe | CCTCATGGTCATGTTATGGTTGAGCTGGTAGCAGAACTCGAAGGCATTAGTACGGTTCGT | 562 |
| gb:MN994467 | Organism:Severe | CCTCATGGTCATGTTATGGTTGAGCTGGTAGCAGAACTCGAAGGCATTAGTACGGTTCGT | 562 |
| gb:MT044257 | Organism:Severe | CCTCATGGTCATGTTATGGTTGAGCTGGTAGCAGAACTCGAAGGCATTAGTACGGTTCGT | 562 |
| gb:MT106054 | Organism:Severe | CCTCATGGTCATGTTATGGTTGAGCTGGTAGCAGAACTCGAAGGCATTAGTACGGTTCGT | 562 |
| gb:MT049951 | Organism:Severe | CCTCATGGTCATGTTATGGTTGAGCTGGTAGCAGAACTCGAAGGCATTAGTACGGTTCGT | 562 |
| gb:MN975262 | Organism:Severe | CCTCATGGTCATGTTATGGTTGAGCTGGTAGCAGAACTCGAAGGCATTAGTACGGTTCGT | 562 |
| gb:MT106052 | Organism:Severe | CCTCATGGTCATGTTATGGTTGAGCTGGTAGCAGAACTCGAAGGCATTAGTACGGTTCGT | 562 |
| gb:LC522975 | Organism:Severe | CCTCATGGTCATGTTATGGTTGAGCTGGTAGCAGAACTCGAAGGCATTAGTACGGTTCGT | 559 |
| gb:LC522973 | Organism:Severe | CCTCATGGTCATGTTATGGTTGAGCTGGTAGCAGAACTCGAAGGCATTAGTACGGTTCGT | 559 |
| gb:LC522974 | Organism:Severe | CCTCATGGTCATGTTATGGTTGAGCTGGTAGCAGAACTCGAAGGCATTAGTACGGTTCGT | 559 |
| gb:MN985325 | Organism:Severe | CCTCATGGTCATGTTATGGTTGAGCTGGTAGCAGAACTCGAAGGCATTAGTACGGTTCGT | 562 |
| gb:MT020881 | Organism:Severe | CCTCATGGTCATGTTATGGTTGAGCTGGTAGCAGAACTCGAAGGCATTAGTACGGTTCGT | 562 |
| gb:MT020880 | Organism:Severe | CCTCATGGTCATGTTATGGTTGAGCTGGTAGCAGAACTCGAAGGCATTAGTACGGTTCGT | 562 |
| gb:MT066175 | Organism:Severe | CCTCATGGTCATGTTATGGTTGAGCTGGTAGCAGAACTCGAAGGCATTAGTACGGTTCGT | 562 |
| gb:MN997409 | Organism:Severe | CCTCATGGTCATGTTATGGTTGAGCTGGTAGCAGAACTCGAAGGCATTAGTACGGTTCGT | 562 |
| gb:MN938384 | Organism:Severe | CCTCATGGTCATGTTATGGTTGAGCTGGTAGCAGAACTCGAAGGCATTAGTACGGTTCGT | 530 |
| gb:MT044258 | Organism:Severe | CCTCA-----TGAGCTGGTAGCAGAACTCGAAGGCATTAGTACGGTTCGT           | 547 |
| gb:MT039890 | Organism:Severe | CCTCATGGTCATGTTATGGTTGAGCTGGTAGCAGAACTCGAAGGCATTAGTACGGTTCGT | 562 |
| gb:MN988713 | Organism:Severe | CCTCATGGTCATGTTATGGTTGAGCTGGTAGCAGAACTCGAAGGCATTAGTACGGTTCGT | 562 |
| gb:LC521925 | Organism:Severe | CCTCATGGTCATGTTATGGTTGAGCTGGTAGCAGAACTCGAAGGCATTAGTACGGTTCGT | 535 |
| gb:MT093571 | Organism:Severe | CCTCATGGTCATGTTATGGTTGAGCTGGTAGCAGAACTCGAAGGCATTAGTACGGTTCGT | 562 |
| gb:MT039887 | Organism:Severe | CCTCATGGTCATGTTATGGTTGAGCTGGTAGCAGAACTCGAAGGCATTAGTACGGTTCGT | 562 |
| gb:MT019530 | Organism:Severe | CCTCATGGTCATGTTATGGTTGAGCTGGTAGCAGAACTCGAAGGCATTAGTACGGTTCGT | 562 |
| gb:MT039888 | Organism:Severe | CCTCATGGTCATGTTATGGTTGAGCTGGTAGCAGAACTCGAAGGCATTAGTACGGTTCGT | 562 |
| gb:LC522972 | Organism:Severe | CCTCATGGTCATGTTATGGTTGAGCTGGTAGCAGAACTCGAAGGCATTAGTACGGTTCGT | 559 |
| gb:MT027063 | Organism:Severe | CCTCATGGTCATGTTATGGTTGAGCTGGTAGCAGAACTCGAAGGCATTAGTACGGTTCGT | 562 |
| gb:MT027062 | Organism:Severe | CCTCATGGTCATGTTATGGTTGAGCTGGTAGCAGAACTCGAAGGCATTAGTACGGTTCGT | 562 |
| gb:MT019529 | Organism:Severe | CCTCATGGTCATGTTATGGTTGAGCTGGTAGCAGAACTCGAAGGCATTAGTACGGTTCGT | 562 |
| gb:MN996529 | Organism:Severe | CCTCATGGTCATGTTATGGTTGAGCTGGTAGCAGAACTCGAAGGCATTAGTACGGTTCGT | 550 |
| gb:MN996531 | Organism:Severe | CCTCATGGTCATGTTATGGTTGAGCTGGTAGCAGAACTCGAAGGCATTAGTACGGTTCGT | 549 |
| gb:MT066176 | Organism:Severe | CCTCATGGTCATGTTATGGTTGAGCTGGTAGCAGAACTCGAAGGCATTAGTACGGTTCGT | 562 |
| gb:MT027064 | Organism:Severe | CCTCATGGTCATGTTATGGTTGAGCTGGTAGCAGAACTCGAAGGCATTAGTACGGTTCGT | 562 |
| gb:MN994468 | Organism:Severe | CCTCATGGTCATGTTATGGTTGAGCTGGTAGCAGAACTCGAAGGCATTAGTACGGTTCGT | 562 |
| gb:MT072688 | Organism:Severe | CCTCATGGTCATGTTATGGTTGAGCTGGTAGCAGAACTCGAAGGCATTAGTACGGTTCGT | 547 |
| gb:MN996527 | Organism:Severe | CCTCATGGTCATGTTATGGTTGAGCTGGTAGCAGAACTCGAAGGCATTAGTACGGTTCGT | 529 |
| gb:MT093631 | Organism:Severe | CCTCATGGTCATGTTATGGTTGAGCTGGTAGCAGAACTCGAAGGCATTAGTACGGTTCGT | 600 |



|             |                 |                                                             |     |
|-------------|-----------------|-------------------------------------------------------------|-----|
| gb:MT106053 | Organism:Severe | CCTCATGGTCATGTTATGGTTGAGCTGGTAGCAGAACTCGAAGGCATTAGTACGGTCGT | 562 |
| gb:MT019533 | Organism:Severe | CCTCATGGTCATGTTATGGTTGAGCTGGTAGCAGAACTCGAAGGCATTAGTACGGTCGT | 562 |
| gb:MT019531 | Organism:Severe | CCTCATGGTCATGTTATGGTTGAGCTGGTAGCAGAACTCGAAGGCATTAGTACGGTCGT | 562 |
| gb:MN996528 | Organism:Severe | CCTCATGGTCATGTTATGGTTGAGCTGGTAGCAGAACTCGAAGGCATTAGTACGGTCGT | 562 |
| gb:MN996530 | Organism:Severe | CCTCATGGTCATGTTATGGTTGAGCTGGTAGCAGAACTCGAAGGCATTAGTACGGTCGT | 548 |
| gb:MN908947 | Organism:Severe | CCTCATGGTCATGTTATGGTTGAGCTGGTAGCAGAACTCGAAGGCATTAGTACGGTCGT | 562 |
| gb:MT019532 | Organism:Severe | CCTCATGGTCATGTTATGGTTGAGCTGGTAGCAGAACTCGAAGGCATTAGTACGGTCGT | 562 |

\*\*\*\*\*

|             |                 |                                                             |     |
|-------------|-----------------|-------------------------------------------------------------|-----|
| gb:MT020781 | Organism:Severe | AGTGGTGAGACACTTGGTGTCTTGTCCCTCATGTGGGCGAAATACCAGTGGCTTACCGC | 610 |
| gb:MT007544 | Organism:Severe | AGTGGTGAGACACTTGGTGTCTTGTCCCTCATGTGGGCGAAATACCAGTGGCTTACCGC | 622 |
| gb:MN994467 | Organism:Severe | AGTGGTGAGACACTTGGTGTCTTGTCCCTCATGTGGGCGAAATACCAGTGGCTTACCGC | 622 |
| gb:MT044257 | Organism:Severe | AGTGGTGAGACACTTGGTGTCTTGTCCCTCATGTGGGCGAAATACCAGTGGCTTACCGC | 622 |
| gb:MT106054 | Organism:Severe | AGTGGTGAGACACTTGGTGTCTTGTCCCTCATGTGGGCGAAATACCAGTGGCTTACCGC | 622 |
| gb:MT049951 | Organism:Severe | AGTGGTGAGACACTTGGTGTCTTGTCCCTCATGTGGGCGAAATACCAGTGGCTTACCGC | 622 |
| gb:MN975262 | Organism:Severe | AGTGGTGAGACACTTGGTGTCTTGTCCCTCATGTGGGCGAAATACCAGTGGCTTACCGC | 622 |
| gb:MT106052 | Organism:Severe | AGTGGTGAGACACTTGGTGTCTTGTCCCTCATGTGGGCGAAATACCAGTGGCTTACCGC | 622 |
| gb:LC522975 | Organism:Severe | AGTGGTGAGACACTTGGTGTCTTGTCCCTCATGTGGGCGAAATACCAGTGGCTTACCGC | 619 |
| gb:LC522973 | Organism:Severe | AGTGGTGAGACACTTGGTGTCTTGTCCCTCATGTGGGCGAAATACCAGTGGCTTACCGC | 619 |
| gb:LC522974 | Organism:Severe | AGTGGTGAGACACTTGGTGTCTTGTCCCTCATGTGGGCGAAATACCAGTGGCTTACCGC | 619 |
| gb:MN985325 | Organism:Severe | AGTGGTGAGACACTTGGTGTCTTGTCCCTCATGTGGGCGAAATACCAGTGGCTTACCGC | 622 |
| gb:MT020881 | Organism:Severe | AGTGGTGAGACACTTGGTGTCTTGTCCCTCATGTGGGCGAAATACCAGTGGCTTACCGC | 622 |
| gb:MT020880 | Organism:Severe | AGTGGTGAGACACTTGGTGTCTTGTCCCTCATGTGGGCGAAATACCAGTGGCTTACCGC | 622 |
| gb:MT066175 | Organism:Severe | AGTGGTGAGACACTTGGTGTCTTGTCCCTCATGTGGGCGAAATACCAGTGGCTTACCGC | 622 |
| gb:MN997409 | Organism:Severe | AGTGGTGAGACACTTGGTGTCTTGTCCCTCATGTGGGCGAAATACCAGTGGCTTACCGC | 622 |
| gb:MN938384 | Organism:Severe | AGTGGTGAGACACTTGGTGTCTTGTCCCTCATGTGGGCGAAATACCAGTGGCTTACCGC | 590 |
| gb:MT044258 | Organism:Severe | AGTGGTGAGACACTTGGTGTCTTGTCCCTCATGTGGGCGAAATACCAGTGGCTTACCGC | 607 |
| gb:MT039890 | Organism:Severe | AGTGGTGAGACACTTGGTGTCTTGTCCCTCATGTGGGCGAAATACCAGTGGCTTACCGC | 622 |
| gb:MN988713 | Organism:Severe | AGTGGTGAGACACTTGGTGTCTTGTCCCTCATGTGGGCGAAATACCAGTGGCTTACCGC | 622 |
| gb:LC521925 | Organism:Severe | AGTGGTGAGACACTTGGTGTCTTGTCCCTCATGTGGGCGAAATACCAGTGGCTTACCGC | 595 |
| gb:MT093571 | Organism:Severe | AGTGGTGAGACACTTGGTGTCTTGTCCCTCATGTGGGCGAAATACCAGTGGCTTACCGC | 622 |
| gb:MT039887 | Organism:Severe | AGTGGTGAGACACTTGGTGTCTTGTCCCTCATGTGGGCGAAATACCAGTGGCTTACCGC | 622 |
| gb:MT019530 | Organism:Severe | AGTGGTGAGACACTTGGTGTCTTGTCCCTCATGTGGGCGAAATACCAGTGGCTTACCGC | 622 |
| gb:MT039888 | Organism:Severe | AGTGGTGAGACACTTGGTGTCTTGTCCCTCATGTGGGCGAAATACCAGTGGCTTACCGC | 622 |
| gb:LC522972 | Organism:Severe | AGTGGTGAGACACTTGGTGTCTTGTCCCTCATGTGGGCGAAATACCAGTGGCTTACCGC | 619 |
| gb:MT027063 | Organism:Severe | AGTGGTGAGACACTTGGTGTCTTGTCCCTCATGTGGGCGAAATACCAGTGGCTTACCGC | 622 |
| gb:MT027062 | Organism:Severe | AGTGGTGAGACACTTGGTGTCTTGTCCCTCATGTGGGCGAAATACCAGTGGCTTACCGC | 622 |
| gb:MT019529 | Organism:Severe | AGTGGTGAGACACTTGGTGTCTTGTCCCTCATGTGGGCGAAATACCAGTGGCTTACCGC | 622 |
| gb:MN996529 | Organism:Severe | AGTGGTGAGACACTTGGTGTCTTGTCCCTCATGTGGGCGAAATACCAGTGGCTTACCGC | 610 |
| gb:MN996531 | Organism:Severe | AGTGGTGAGACACTTGGTGTCTTGTCCCTCATGTGGGCGAAATACCAGTGGCTTACCGC | 609 |
| gb:MT066176 | Organism:Severe | AGTGGTGAGACACTTGGTGTCTTGTCCCTCATGTGGGCGAAATACCAGTGGCTTACCGC | 622 |
| gb:MT027064 | Organism:Severe | AGTGGTGAGACACTTGGTGTCTTGTCCCTCATGTGGGCGAAATACCAGTGGCTTACCGC | 622 |
| gb:MN994468 | Organism:Severe | AGTGGTGAGACACTTGGTGTCTTGTCCCTCATGTGGGCGAAATACCAGTGGCTTACCGC | 622 |
| gb:MT072688 | Organism:Severe | AGTGGTGAGACACTTGGTGTCTTGTCCCTCATGTGGGCGAAATACCAGTGGCTTACCGC | 607 |
| gb:MN996527 | Organism:Severe | AGTGGTGAGACACTTGGTGTCTTGTCCCTCATGTGGGCGAAATACCAGTGGCTTACCGC | 589 |
| gb:MT093631 | Organism:Severe | AGTGGTGAGACACTTGGTGTCTTGTCCCTCATGTGGGCGAAATACCAGTGGCTTACCGC | 660 |
| gb:MT106053 | Organism:Severe | AGTGGTGAGACACTTGGTGTCTTGTCCCTCATGTGGGCGAAATACCAGTGGCTTACCGC | 622 |
| gb:MT019533 | Organism:Severe | AGTGGTGAGACACTTGGTGTCTTGTCCCTCATGTGGGCGAAATACCAGTGGCTTACCGC | 622 |
| gb:MT019531 | Organism:Severe | AGTGGTGAGACACTTGGTGTCTTGTCCCTCATGTGGGCGAAATACCAGTGGCTTACCGC | 622 |
| gb:MN996528 | Organism:Severe | AGTGGTGAGACACTTGGTGTCTTGTCCCTCATGTGGGCGAAATACCAGTGGCTTACCGC | 622 |
| gb:MN996530 | Organism:Severe | AGTGGTGAGACACTTGGTGTCTTGTCCCTCATGTGGGCGAAATACCAGTGGCTTACCGC | 608 |
| gb:MN908947 | Organism:Severe | AGTGGTGAGACACTTGGTGTCTTGTCCCTCATGTGGGCGAAATACCAGTGGCTTACCGC | 622 |
| gb:MT019532 | Organism:Severe | AGTGGTGAGACACTTGGTGTCTTGTCCCTCATGTGGGCGAAATACCAGTGGCTTACCGC | 622 |

\*\*\*\*\*

|             |                 |                                                              |     |
|-------------|-----------------|--------------------------------------------------------------|-----|
| gb:MT020781 | Organism:Severe | AAGGTTCTTCTTCGTAAGAACGGTAATAAAGGAGCTGGTGGCCATAGTTACGGCGCCGAT | 670 |
| gb:MT007544 | Organism:Severe | AAGGTTCTTCTTCGTAAGAACGGTAATAAAGGAGCTGGTGGCCATAGTTACGGCGCCGAT | 682 |
| gb:MN994467 | Organism:Severe | AAGGTTCTTCTTCGTAAGAACGGTAATAAAGGAGCTGGTGGCCATAGTTACGGCGCCGAT | 682 |
| gb:MT044257 | Organism:Severe | AAGGTTCTTCTTCGTAAGAACGGTAATAAAGGAGCTGGTGGCCATAGTTACGGCGCCGAT | 682 |
| gb:MT106054 | Organism:Severe | AAGGTTCTTCTTCGTAAGAACGGTAATAAAGGAGCTGGTGGCCATAGTTACGGCGCCGAT | 682 |
| gb:MT049951 | Organism:Severe | AAGGTTCTTCTTCGTAAGAACGGTAATAAAGGAGCTGGTGGCCATAGTTACGGCGCCGAT | 682 |
| gb:MN975262 | Organism:Severe | AAGGTTCTTCTTCGTAAGAACGGTAATAAAGGAGCTGGTGGCCATAGTTACGGCGCCGAT | 682 |
| gb:MT106052 | Organism:Severe | AAGGTTCTTCTTCGTAAGAACGGTAATAAAGGAGCTGGTGGCCATAGTTACGGCGCCGAT | 682 |
| gb:LC522975 | Organism:Severe | AAGGTTCTTCTTCGTAAGAACGGTAATAAAGGAGCTGGTGGCCATAGTTACGGCGCCGAT | 679 |
| gb:LC522973 | Organism:Severe | AAGGTTCTTCTTCGTAAGAACGGTAATAAAGGAGCTGGTGGCCATAGTTACGGCGCCGAT | 679 |

|             |                 |                                                              |     |
|-------------|-----------------|--------------------------------------------------------------|-----|
| gb:LC522974 | Organism:Severe | AAGGTTCTTCTTCGTAAGAACGGTAATAAAGGAGCTGGTGGCCATAGTTACGGCGCCGAT | 679 |
| gb:MN985325 | Organism:Severe | AAGGTTCTTCTTCGTAAGAACGGTAATAAAGGAGCTGGTGGCCATAGTTACGGCGCCGAT | 682 |
| gb:MT020881 | Organism:Severe | AAGGTTCTTCTTCGTAAGAACGGTAATAAAGGAGCTGGTGGCCATAGTTACGGCGCCGAT | 682 |
| gb:MT020880 | Organism:Severe | AAGGTTCTTCTTCGTAAGAACGGTAATAAAGGAGCTGGTGGCCATAGTTACGGCGCCGAT | 682 |
| gb:MT066175 | Organism:Severe | AAGGTTCTTCTTCGTAAGAACGGTAATAAAGGAGCTGGTGGCCATAGTTACGGCGCCGAT | 682 |
| gb:MN997409 | Organism:Severe | AAGGTTCTTCTTCGTAAGAACGGTAATAAAGGAGCTGGTGGCCATAGTTACGGCGCCGAT | 682 |
| gb:MN938384 | Organism:Severe | AAGGTTCTTCTTCGTAAGAACGGTAATAAAGGAGCTGGTGGCCATAGTTACGGCGCCGAT | 650 |
| gb:MT044258 | Organism:Severe | AAGGTTCTTCTTCGTAAGAACGGTAATAAAGGAGCTGGTGGCCATAGTTACGGCGCCGAT | 667 |
| gb:MT039890 | Organism:Severe | AAGGTTCTTCTTCGTAAGAACGGTAATAAAGGAGCTGGTGGCCATAGTTACGGCGCCGAT | 682 |
| gb:MN988713 | Organism:Severe | AAGGTTCTTCTTCGTAAGAACGGTAATAAAGGAGCTGGTGGCCATAGTTACGGCGCCGAT | 682 |
| gb:LC521925 | Organism:Severe | AAGGTTCTTCTTCGTAAGAACGGTAATAAAGGAGCTGGTGGCCATAGTTACGGCGCCGAT | 655 |
| gb:MT093571 | Organism:Severe | AAGGTTCTTCTTCGTAAGAACGGTAATAAAGGAGCTGGTGGCCATAGTTACGGCGCCGAT | 682 |
| gb:MT039887 | Organism:Severe | AAGGTTCTTCTTCGTAAGAACGGTAATAAAGGAGCTGGTGGCCATAGTTACGGCGCCGAT | 682 |
| gb:MT019530 | Organism:Severe | AAGGTTCTTCTTCGTAAGAACGGTAATAAAGGAGCTGGTGGCCATAGTTACGGCGCCGAT | 682 |
| gb:MT039888 | Organism:Severe | AAGGTTCTTCTTCGTAAGAACGGTAATAAAGGAGCTGGTGGCCATAGTTACGGCGCCGAT | 682 |
| gb:LC522972 | Organism:Severe | AAGGTTCTTCTTCGTAAGAACGGTAATAAAGGAGCTGGTGGCCATAGTTACGGCGCCGAT | 679 |
| gb:MT027063 | Organism:Severe | AAGGTTCTTCTTCGTAAGAACGGTAATAAAGGAGCTGGTGGCCATAGTTACGGCGCCGAT | 682 |
| gb:MT027062 | Organism:Severe | AAGGTTCTTCTTCGTAAGAACGGTAATAAAGGAGCTGGTGGCCATAGTTACGGCGCCGAT | 682 |
| gb:MT019529 | Organism:Severe | AAGGTTCTTCTTCGTAAGAACGGTAATAAAGGAGCTGGTGGCCATAGTTACGGCGCCGAT | 682 |
| gb:MN996529 | Organism:Severe | AAGGTTCTTCTTCGTAAGAACGGTAATAAAGGAGCTGGTGGCCATAGTTACGGCGCCGAT | 670 |
| gb:MN996531 | Organism:Severe | AAGGTTCTTCTTCGTAAGAACGGTAATAAAGGAGCTGGTGGCCATAGTTACGGCGCCGAT | 669 |
| gb:MT066176 | Organism:Severe | AAGGTTCTTCTTCGTAAGAACGGTAATAAAGGAGCTGGTGGCCATAGTTACGGCGCCGAT | 682 |
| gb:MT027064 | Organism:Severe | AAGGTTCTTCTTCGTAAGAACGGTAATAAAGGAGCTGGTGGCCATAGTTACGGCGCCGAT | 682 |
| gb:MN994468 | Organism:Severe | AAGGTTCTTCTTCGTAAGAACGGTAATAAAGGAGCTGGTGGCCATAGTTACGGCGCCGAT | 682 |
| gb:MT072688 | Organism:Severe | AAGGTTCTTCTTCGTAAGAACGGTAATAAAGGAGCTGGTGGCCATAGTTACGGCGCCGAT | 667 |
| gb:MN996527 | Organism:Severe | AAGGTTCTTCTTCGTAAGAACGGTAATAAAGGAGCTGGTGGCCATAGTTACGGCGCCGAT | 649 |
| gb:MT093631 | Organism:Severe | AAGGTTCTTCTTCGTAAGAACGGTAATAAAGGAGCTGGTGGCCATAGTTACGGCGCCGAT | 720 |
| gb:MT106053 | Organism:Severe | AAGGTTCTTCTTCGTAAGAACGGTAATAAAGGAGCTGGTGGCCATAGTTACGGCGCCGAT | 682 |
| gb:MT019533 | Organism:Severe | AAGGTTCTTCTTCGTAAGAACGGTAATAAAGGAGCTGGTGGCCATAGTTACGGCGCCGAT | 682 |
| gb:MT019531 | Organism:Severe | AAGGTTCTTCTTCGTAAGAACGGTAATAAAGGAGCTGGTGGCCATAGTTACGGCGCCGAT | 682 |
| gb:MN996528 | Organism:Severe | AAGGTTCTTCTTCGTAAGAACGGTAATAAAGGAGCTGGTGGCCATAGTTACGGCGCCGAT | 682 |
| gb:MN996530 | Organism:Severe | AAGGTTCTTCTTCGTAAGAACGGTAATAAAGGAGCTGGTGGCCATAGTTACGGCGCCGAT | 668 |
| gb:MN908947 | Organism:Severe | AAGGTTCTTCTTCGTAAGAACGGTAATAAAGGAGCTGGTGGCCATAGTTACGGCGCCGAT | 682 |
| gb:MT019532 | Organism:Severe | AAGGTTCTTCTTCGTAAGAACGGTAATAAAGGAGCTGGTGGCCATAGTTACGGCGCCGAT | 682 |

\*\*\*\*\*

|             |                 |                                                              |     |
|-------------|-----------------|--------------------------------------------------------------|-----|
| gb:MT020781 | Organism:Severe | CTAAAGTCATTTGACTTAGGCGACGAGCTTGGCACTGATCCTTATGAAGATTTTCAAGAA | 730 |
| gb:MT007544 | Organism:Severe | CTAAAGTCATTTGACTTAGGCGACGAGCTTGGCACTGATCCTTATGAAGATTTTCAAGAA | 742 |
| gb:MN994467 | Organism:Severe | CTAAAGTCATTTGACTTAGGCGACGAGCTTGGCACTGATCCTTATGAAGATTTTCAAGAA | 742 |
| gb:MT044257 | Organism:Severe | CTAAAGTCATTTGACTTAGGCGACGAGCTTGGCACTGATCCTTATGAAGATTTTCAAGAA | 742 |
| gb:MT106054 | Organism:Severe | CTAAAGTCATTTGACTTAGGCGACGAGCTTGGCACTGATCCTTATGAAGATTTTCAAGAA | 742 |
| gb:MT049951 | Organism:Severe | CTAAAGTCATTTGACTTAGGCGACGAGCTTGGCACTGATCCTTATGAAGATTTTCAAGAA | 742 |
| gb:MN975262 | Organism:Severe | CTAAAGTCATTTGACTTAGGCGACGAGCTTGGCACTGATCCTTATGAAGATTTTCAAGAA | 742 |
| gb:MT106052 | Organism:Severe | CTAAAGTCATTTGACTTAGGCGACGAGCTTGGCACTGATCCTTATGAAGATTTTCAAGAA | 742 |
| gb:LC522975 | Organism:Severe | CTAAAGTCATTTGACTTAGGCGACGAGCTTGGCACTGATCCTTATGAAGATTTTCAAGAA | 739 |
| gb:LC522973 | Organism:Severe | CTAAAGTCATTTGACTTAGGCGACGAGCTTGGCACTGATCCTTATGAAGATTTTCAAGAA | 739 |
| gb:LC522974 | Organism:Severe | CTAAAGTCATTTGACTTAGGCGACGAGCTTGGCACTGATCCTTATGAAGATTTTCAAGAA | 739 |
| gb:MN985325 | Organism:Severe | CTAAAGTCATTTGACTTAGGCGACGAGCTTGGCACTGATCCTTATGAAGATTTTCAAGAA | 742 |
| gb:MT020881 | Organism:Severe | CTAAAGTCATTTGACTTAGGCGACGAGCTTGGCACTGATCCTTATGAAGATTTTCAAGAA | 742 |
| gb:MT020880 | Organism:Severe | CTAAAGTCATTTGACTTAGGCGACGAGCTTGGCACTGATCCTTATGAAGATTTTCAAGAA | 742 |
| gb:MT066175 | Organism:Severe | CTAAAGTCATTTGACTTAGGCGACGAGCTTGGCACTGATCCTTATGAAGATTTTCAAGAA | 742 |
| gb:MN997409 | Organism:Severe | CTAAAGTCATTTGACTTAGGCGACGAGCTTGGCACTGATCCTTATGAAGATTTTCAAGAA | 742 |
| gb:MN938384 | Organism:Severe | CTAAAGTCATTTGACTTAGGCGACGAGCTTGGCACTGATCCTTATGAAGATTTTCAAGAA | 710 |
| gb:MT044258 | Organism:Severe | CTA-----GACTTAGGCGACGAGCTTGGCACTGATCCTTATGAAGATTTTCAAGAA     | 718 |
| gb:MT039890 | Organism:Severe | CTAAAGTCATTTGACTTAGGCGACGAGCTTGGCACTGATCCTTATGAAGATTTTCAAGAA | 742 |
| gb:MN988713 | Organism:Severe | CTAAAGTCATTTGACTTAGGCGACGAGCTTGGCACTGATCCTTATGAAGATTTTCAAGAA | 742 |
| gb:LC521925 | Organism:Severe | CTAAAGTCATTTGACTTAGGCGACGAGCTTGGCACTGATCCTTATGAAGATTTTCAAGAA | 715 |
| gb:MT093571 | Organism:Severe | CTAAAGTCATTTGACTTAGGCGACGAGCTTGGCACTGATCCTTATGAAGATTTTCAAGAA | 742 |
| gb:MT039887 | Organism:Severe | CTAAAGTCATTTGACTTAGGCGACGAGCTTGGCACTGATCCTTATGAAGATTTTCAAGAA | 742 |
| gb:MT019530 | Organism:Severe | CTAAAGTCATTTGACTTAGGCGACGAGCTTGGCACTGATCCTTATGAAGATTTTCAAGAA | 742 |
| gb:MT039888 | Organism:Severe | CTAAAGTCATTTGACTTAGGCGACGAGCTTGGCACTGATCCTTATGAAGATTTTCAAGAA | 742 |
| gb:LC522972 | Organism:Severe | CTAAAGTCATTTGACTTAGGCGACGAGCTTGGCACTGATCCTTATGAAGATTTTCAAGAA | 739 |
| gb:MT027063 | Organism:Severe | CTAAAGTCATTTGACTTAGGCGACGAGCTTGGCACTGATCCTTATGAAGATTTTCAAGAA | 742 |
| gb:MT027062 | Organism:Severe | CTAAAGTCATTTGACTTAGGCGACGAGCTTGGCACTGATCCTTATGAAGATTTTCAAGAA | 742 |
| gb:MT019529 | Organism:Severe | CTAAAGTCATTTGACTTAGGCGACGAGCTTGGCACTGATCCTTATGAAGATTTTCAAGAA | 742 |

|             |                 |                                                              |     |
|-------------|-----------------|--------------------------------------------------------------|-----|
| gb:MN996529 | Organism:Severe | CTAAAGTCATTTGACTTAGGCGACGAGCTTGGCACTGATCCTTATGAAGATTTTCAAGAA | 730 |
| gb:MN996531 | Organism:Severe | CTAAAGTCATTTGACTTAGGCGACGAGCTTGGCACTGATCCTTATGAAGATTTTCAAGAA | 729 |
| gb:MT066176 | Organism:Severe | CTAAAGTCATTTGACTTAGGCGACGAGCTTGGCACTGATCCTTATGAAGATTTTCAAGAA | 742 |
| gb:MT027064 | Organism:Severe | CTAAAGTCATTTGACTTAGGCGACGAGCTTGGCACTGATCCTTATGAAGATTTTCAAGAA | 742 |
| gb:MN994468 | Organism:Severe | CTAAAGTCATTTGACTTAGGCGACGAGCTTGGCACTGATCCTTATGAAGATTTTCAAGAA | 742 |
| gb:MT072688 | Organism:Severe | CTAAAGTCATTTGACTTAGGCGACGAGCTTGGCACTGATCCTTATGAAGATTTTCAAGAA | 727 |
| gb:MN996527 | Organism:Severe | CTAAAGTCATTTGACTTAGGCGACGAGCTTGGCACTGATCCTTATGAAGATTTTCAAGAA | 709 |
| gb:MT093631 | Organism:Severe | CTAAAGTCATTTGACTTAGGCGACGAGCTTGGCACTGATCCTTATGAAGATTTTCAAGAA | 780 |
| gb:MT106053 | Organism:Severe | CTAAAGTCATTTGACTTAGGCGACGAGCTTGGCACTGATCCTTATGAAGATTTTCAAGAA | 742 |
| gb:MT019533 | Organism:Severe | CTAAAGTCATTTGACTTAGGCGACGAGCTTGGCACTGATCCTTATGAAGATTTTCAAGAA | 742 |
| gb:MT019531 | Organism:Severe | CTAAAGTCATTTGACTTAGGCGACGAGCTTGGCACTGATCCTTATGAAGATTTTCAAGAA | 742 |
| gb:MN996528 | Organism:Severe | CTAAAGTCATTTGACTTAGGCGACGAGCTTGGCACTGATCCTTATGAAGATTTTCAAGAA | 742 |
| gb:MN996530 | Organism:Severe | CTAAAGTCATTTGACTTAGGCGACGAGCTTGGCACTGATCCTTATGAAGATTTTCAAGAA | 728 |
| gb:MN908947 | Organism:Severe | CTAAAGTCATTTGACTTAGGCGACGAGCTTGGCACTGATCCTTATGAAGATTTTCAAGAA | 742 |
| gb:MT019532 | Organism:Severe | CTAAAGTCATTTGACTTAGGCGACGAGCTTGGCACTGATCCTTATGAAGATTTTCAAGAA | 742 |

\*\*\* \*\*\*\*\*

|             |                 |                                                              |     |
|-------------|-----------------|--------------------------------------------------------------|-----|
| gb:MT020781 | Organism:Severe | AACTGGAACACTAAACATAGCAGTGGTGTACCCGTGAACCTCATGCGTGAGCTTAACGGA | 790 |
| gb:MT007544 | Organism:Severe | AACTGGAACACTAAACATAGCAGTGGTGTACCCGTGAACCTCATGCGTGAGCTTAACGGA | 802 |
| gb:MN994467 | Organism:Severe | AACTGGAACACTAAACATAGCAGTGGTGTACCCGTGAACCTCATGCGTGAGCTTAACGGA | 802 |
| gb:MT044257 | Organism:Severe | AACTGGAACACTAAACATAGCAGTGGTGTACCCGTGAACCTCATGCGTGAGCTTAACGGA | 802 |
| gb:MT106054 | Organism:Severe | AACTGGAACACTAAACATAGCAGTGGTGTACCCGTGAACCTCATGCGTGAGCTTAACGGA | 802 |
| gb:MT049951 | Organism:Severe | AACTGGAACACTAAACATAGCAGTGGTGTACCCGTGAACCTCATGCGTGAGCTTAACGGA | 802 |
| gb:MN975262 | Organism:Severe | AACTGGAACACTAAACATAGCAGTGGTGTACCCGTGAACCTCATGCGTGAGCTTAACGGA | 802 |
| gb:MT106052 | Organism:Severe | AACTGGAACACTAAACATAGCAGTGGTGTACCCGTGAACCTCATGCGTGAGCTTAACGGA | 802 |
| gb:LC522975 | Organism:Severe | AACTGGAACACTAAACATAGCAGTGGTGTACCCGTGAACCTCATGCGTGAGCTTAACGGA | 799 |
| gb:LC522973 | Organism:Severe | AACTGGAACACTAAACATAGCAGTGGTGTACCCGTGAACCTCATGCGTGAGCTTAACGGA | 799 |
| gb:LC522974 | Organism:Severe | AACTGGAACACTAAACATAGCAGTGGTGTACCCGTGAACCTCATGCGTGAGCTTAACGGA | 799 |
| gb:MN985325 | Organism:Severe | AACTGGAACACTAAACATAGCAGTGGTGTACCCGTGAACCTCATGCGTGAGCTTAACGGA | 802 |
| gb:MT020881 | Organism:Severe | AACTGGAACACTAAACATAGCAGTGGTGTACCCGTGAACCTCATGCGTGAGCTTAACGGA | 802 |
| gb:MT020880 | Organism:Severe | AACTGGAACACTAAACATAGCAGTGGTGTACCCGTGAACCTCATGCGTGAGCTTAACGGA | 802 |
| gb:MT066175 | Organism:Severe | AACTGGAACACTAAACATAGCAGTGGTGTACCCGTGAACCTCATGCGTGAGCTTAACGGA | 802 |
| gb:MN997409 | Organism:Severe | AACTGGAACACTAAACATAGCAGTGGTGTACCCGTGAACCTCATGCGTGAGCTTAACGGA | 802 |
| gb:MN938384 | Organism:Severe | AACTGGAACACTAAACATAGCAGTGGTGTACCCGTGAACCTCATGCGTGAGCTTAACGGA | 770 |
| gb:MT044258 | Organism:Severe | AACTGGAACACTAAACATAGCAGTGGTGTACCCGTGAACCTCATGCGTGAGCTTAACGGA | 778 |
| gb:MT039890 | Organism:Severe | AACTGGAACACTAAACATAGCAGTGGTGTACCCGTGAACCTCATGCGTGAGCTTAACGGA | 802 |
| gb:MN988713 | Organism:Severe | AACTGGAACACTAAACATAGCAGTGGTGTACCCGTGAACCTCATGCGTGAGCTTAACGGA | 802 |
| gb:LC521925 | Organism:Severe | AACTGGAACACTAAACATAGCAGTGGTGTACCCGTGAACCTCATGCGTGAGCTTAACGGA | 775 |
| gb:MT093571 | Organism:Severe | AACTGGAACACTAAACATAGCAGTGGTGTACCCGTGAACCTCATGCGTGAGCTTAACGGA | 802 |
| gb:MT039887 | Organism:Severe | AACTGGAACACTAAACATAGCAGTGGTGTACCCGTGAACCTCATGCGTGAGCTTAACGGA | 802 |
| gb:MT019530 | Organism:Severe | AACTGGAACACTAAACATAGCAGTGGTGTACCCGTGAACCTCATGCGTGAGCTTAACGGA | 802 |
| gb:MT039888 | Organism:Severe | AACTGGAACACTAAACATAGCAGTGGTGTACCCGTGAACCTCATGCGTGAGCTTAACGGA | 802 |
| gb:LC522972 | Organism:Severe | AACTGGAACACTAAACATAGCAGTGGTGTACCCGTGAACCTCATGCGTGAGCTTAACGGA | 799 |
| gb:MT027063 | Organism:Severe | AACTGGAACACTAAACATAGCAGTGGTGTACCCGTGAACCTCATGCGTGAGCTTAACGGA | 802 |
| gb:MT027062 | Organism:Severe | AACTGGAACACTAAACATAGCAGTGGTGTACCCGTGAACCTCATGCGTGAGCTTAACGGA | 802 |
| gb:MT019529 | Organism:Severe | AACTGGAACACTAAACATAGCAGTGGTGTACCCGTGAACCTCATGCGTGAGCTTAACGGA | 802 |
| gb:MN996529 | Organism:Severe | AACTGGAACACTAAACATAGCAGTGGTGTACCCGTGAACCTCATGCGTGAGCTTAACGGA | 790 |
| gb:MN996531 | Organism:Severe | AACTGGAACACTAAACATAGCAGTGGTGTACCCGTGAACCTCATGCGTGAGCTTAACGGA | 789 |
| gb:MT066176 | Organism:Severe | AACTGGAACACTAAACATAGCAGTGGTGTACCCGTGAACCTCATGCGTGAGCTTAACGGA | 802 |
| gb:MT027064 | Organism:Severe | AACTGGAACACTAAACATAGCAGTGGTGTACCCGTGAACCTCATGCGTGAGCTTAACGGA | 802 |
| gb:MN994468 | Organism:Severe | AACTGGAACACTAAACATAGCAGTGGTGTACCCGTGAACCTCATGCGTGAGCTTAACGGA | 802 |
| gb:MT072688 | Organism:Severe | AACTGGAACACTAAACATAGCAGTGGTGTACCCGTGAACCTCATGCGTGAGCTTAACGGA | 787 |
| gb:MN996527 | Organism:Severe | AACTGGAACACTAAACATAGCAGTGGTGTACCCGTGAACCTCATGCGTGAGCTTAACGGA | 769 |
| gb:MT093631 | Organism:Severe | AACTGGAACACTAAACATAGCAGTGGTGTACCCGTGAACCTCATGCGTGAGCTTAACGGA | 840 |
| gb:MT106053 | Organism:Severe | AACTGGAACACTAAACATAGCAGTGGTGTACCCGTGAACCTCATGCGTGAGCTTAACGGA | 802 |
| gb:MT019533 | Organism:Severe | AACTGGAACACTAAACATAGCAGTGGTGTACCCGTGAACCTCATGCGTGAGCTTAACGGA | 802 |
| gb:MT019531 | Organism:Severe | AACTGGAACACTAAACATAGCAGTGGTGTACCCGTGAACCTCATGCGTGAGCTTAACGGA | 802 |
| gb:MN996528 | Organism:Severe | AACTGGAACACTAAACATAGCAGTGGTGTACCCGTGAACCTCATGCGTGAGCTTAACGGA | 802 |
| gb:MN996530 | Organism:Severe | AACTGGAACACTAAACATAGCAGTGGTGTACCCGTGAACCTCATGCGTGAGCTTAACGGA | 788 |
| gb:MN908947 | Organism:Severe | AACTGGAACACTAAACATAGCAGTGGTGTACCCGTGAACCTCATGCGTGAGCTTAACGGA | 802 |
| gb:MT019532 | Organism:Severe | AACTGGAACACTAAACATAGCAGTGGTGTACCCGTGAACCTCATGCGTGAGCTTAACGGA | 802 |

\*\*\*\*\*

|             |                 |                                                             |     |
|-------------|-----------------|-------------------------------------------------------------|-----|
| gb:MT020781 | Organism:Severe | GGGGCATACTCGCTATGTCGATAACAACCTTCTGTGGCCCTGATGGCTACCCTCTTGAG | 850 |
| gb:MT007544 | Organism:Severe | GGGGCATACTCGCTATGTCGATAACAACCTTCTGTGGCCCTGATGGCTACCCTCTTGAG | 862 |

|             |                 |                                                             |     |
|-------------|-----------------|-------------------------------------------------------------|-----|
| gb:MN994467 | Organism:Severe | GGGGCATACTCGCTATGTCGATAACAACCTTCTGTGGCCCTGATGGCTACCCCTTTGAG | 862 |
| gb:MT044257 | Organism:Severe | GGGGCATACTCGCTATGTCGATAACAACCTTCTGTGGCCCTGATGGCTACCCCTTTGAG | 862 |
| gb:MT106054 | Organism:Severe | GGGGCATACTCGCTATGTCGATAACAACCTTCTGTGGCCCTGATGGCTACCCCTTTGAG | 862 |
| gb:MT049951 | Organism:Severe | GGGGCATACTCGCTATGTCGATAACAACCTTCTGTGGCCCTGATGGCTACCCCTTTGAG | 862 |
| gb:MN975262 | Organism:Severe | GGGGCATACTCGCTATGTCGATAACAACCTTCTGTGGCCCTGATGGCTACCCCTTTGAG | 862 |
| gb:MT106052 | Organism:Severe | GGGGCATACTCGCTATGTCGATAACAACCTTCTGTGGCCCTGATGGCTACCCCTTTGAG | 862 |
| gb:LC522975 | Organism:Severe | GGGGCATACTCGCTATGTCGATAACAACCTTCTGTGGCCCTGATGGCTACCCCTTTGAG | 859 |
| gb:LC522973 | Organism:Severe | GGGGCATACTCGCTATGTCGATAACAACCTTCTGTGGCCCTGATGGCTACCCCTTTGAG | 859 |
| gb:LC522974 | Organism:Severe | GGGGCATACTCGCTATGTCGATAACAACCTTCTGTGGCCCTGATGGCTACCCCTTTGAG | 859 |
| gb:MN985325 | Organism:Severe | GGGGCATACTCGCTATGTCGATAACAACCTTCTGTGGCCCTGATGGCTACCCCTTTGAG | 862 |
| gb:MT020881 | Organism:Severe | GGGGCATACTCGCTATGTCGATAACAACCTTCTGTGGCCCTGATGGCTACCCCTTTGAG | 862 |
| gb:MT020880 | Organism:Severe | GGGGCATACTCGCTATGTCGATAACAACCTTCTGTGGCCCTGATGGCTACCCCTTTGAG | 862 |
| gb:MT066175 | Organism:Severe | GGGGCATACTCGCTATGTCGATAACAACCTTCTGTGGCCCTGATGGCTACCCCTTTGAG | 862 |
| gb:MN997409 | Organism:Severe | GGGGCATACTCGCTATGTCGATAACAACCTTCTGTGGCCCTGATGGCTACCCCTTTGAG | 862 |
| gb:MN938384 | Organism:Severe | GGGGCATACTCGCTATGTCGATAACAACCTTCTGTGGCCCTGATGGCTACCCCTTTGAG | 830 |
| gb:MT044258 | Organism:Severe | GGGGCATACTCGCTATGTCGATAACAACCTTCTGTGGCCCTGATGGCTACCCCTTTGAG | 838 |
| gb:MT039890 | Organism:Severe | GGGGCATACTCGCTATGTCGATAACAACCTTCTGTGGCCCTGATGGCTACCCCTTTGAG | 862 |
| gb:MN988713 | Organism:Severe | GGGGCATACTCGCTATGTCGATAACAACCTTCTGTGGCCCTGATGGCTACCCCTTTGAG | 862 |
| gb:LC521925 | Organism:Severe | GGGGCATACTCGCTATGTCGATAACAACCTTCTGTGGCCCTGATGGCTACCCCTTTGAG | 835 |
| gb:MT093571 | Organism:Severe | GGGGCATACTCGCTATGTCGATAACAACCTTCTGTGGCCCTGATGGCTACCCCTTTGAG | 862 |
| gb:MT039887 | Organism:Severe | GGGGCATACTCGCTATGTCGATAACAACCTTCTGTGGCCCTGATGGCTACCCCTTTGAG | 862 |
| gb:MT019530 | Organism:Severe | GGGGCATACTCGCTATGTCGATAACAACCTTCTGTGGCCCTGATGGCTACCCCTTTGAG | 862 |
| gb:MT039888 | Organism:Severe | GGGGCATACTCGCTATGTCGATAACAACCTTCTGTGGCCCTGATGGCTACCCCTTTGAG | 862 |
| gb:LC522972 | Organism:Severe | GGGGCATACTCGCTATGTCGATAACAACCTTCTGTGGCCCTGATGGCTACCCCTTTGAG | 859 |
| gb:MT027063 | Organism:Severe | GGGGCATACTCGCTATGTCGATAACAACCTTCTGTGGCCCTGATGGCTACCCCTTTGAG | 862 |
| gb:MT027062 | Organism:Severe | GGGGCATACTCGCTATGTCGATAACAACCTTCTGTGGCCCTGATGGCTACCCCTTTGAG | 862 |
| gb:MT019529 | Organism:Severe | GGGGCATACTCGCTATGTCGATAACAACCTTCTGTGGCCCTGATGGCTACCCCTTTGAG | 862 |
| gb:MN996529 | Organism:Severe | GGGGCATACTCGCTATGTCGATAACAACCTTCTGTGGCCCTGATGGCTACCCCTTTGAG | 850 |
| gb:MN996531 | Organism:Severe | GGGGCATACTCGCTATGTCGATAACAACCTTCTGTGGCCCTGATGGCTACCCCTTTGAG | 849 |
| gb:MT066176 | Organism:Severe | GGGGCATACTCGCTATGTCGATAACAACCTTCTGTGGCCCTGATGGCTACCCCTTTGAG | 862 |
| gb:MT027064 | Organism:Severe | GGGGCATACTCGCTATGTCGATAACAACCTTCTGTGGCCCTGATGGCTACCCCTTTGAG | 862 |
| gb:MN994468 | Organism:Severe | GGGGCATACTCGCTATGTCGATAACAACCTTCTGTGGCCCTGATGGCTACCCCTTTGAG | 862 |
| gb:MT072688 | Organism:Severe | GGGGCATACTCGCTATGTCGATAACAACCTTCTGTGGCCCTGATGGCTACCCCTTTGAG | 847 |
| gb:MN996527 | Organism:Severe | GGGGCATACTCGCTATGTCGATAACAACCTTCTGTGGCCCTGATGGCTACCCCTTTGAG | 829 |
| gb:MT093631 | Organism:Severe | GGGGCATACTCGCTATGTCGATAACAACCTTCTGTGGCCCTGATGGCTACCCCTTTGAG | 900 |
| gb:MT106053 | Organism:Severe | GGGGCATACTCGCTATGTCGATAACAACCTTCTGTGGCCCTGATGGCTACCCCTTTGAG | 862 |
| gb:MT019533 | Organism:Severe | GGGGCATACTCGCTATGTCGATAACAACCTTCTGTGGCCCTGATGGCTACCCCTTTGAG | 862 |
| gb:MT019531 | Organism:Severe | GGGGCATACTCGCTATGTCGATAACAACCTTCTGTGGCCCTGATGGCTACCCCTTTGAG | 862 |
| gb:MN996528 | Organism:Severe | GGGGCATACTCGCTATGTCGATAACAACCTTCTGTGGCCCTGATGGCTACCCCTTTGAG | 862 |
| gb:MN996530 | Organism:Severe | GGGGCATACTCGCTATGTCGATAACAACCTTCTGTGGCCCTGATGGCTACCCCTTTGAG | 848 |
| gb:MN908947 | Organism:Severe | GGGGCATACTCGCTATGTCGATAACAACCTTCTGTGGCCCTGATGGCTACCCCTTTGAG | 862 |
| gb:MT019532 | Organism:Severe | GGGGCATACTCGCTATGTCGATAACAACCTTCTGTGGCCCTGATGGCTACCCCTTTGAG | 862 |

\*\*\*\*\*

|             |                 |                                                              |     |
|-------------|-----------------|--------------------------------------------------------------|-----|
| gb:MT020781 | Organism:Severe | TGCATTAAGACCTTCTAGCACGTGCTGGTAAAGCTTCATGCACTTTGTCCGAACAACCTG | 910 |
| gb:MT007544 | Organism:Severe | TGCATTAAGACCTTCTAGCACGTGCTGGTAAAGCTTCATGCACTTTGTCCGAACAACCTG | 922 |
| gb:MN994467 | Organism:Severe | TGCATTAAGACCTTCTAGCACGTGCTGGTAAAGCTTCATGCACTTTGTCCGAACAACCTG | 922 |
| gb:MT044257 | Organism:Severe | TGCATTAAGACCTTCTAGCACGTGCTGGTAAAGCTTCATGCACTTTGTCCGAACAACCTG | 922 |
| gb:MT106054 | Organism:Severe | TGCATTAAGACCTTCTAGCACGTGCTGGTAAAGCTTCATGCACTTTGTCCGAACAACCTG | 922 |
| gb:MT049951 | Organism:Severe | TGCATTAAGACCTTCTAGCACGTGCTGGTAAAGCTTCATGCACTTTGTCCGAACAACCTG | 922 |
| gb:MN975262 | Organism:Severe | TGCATTAAGACCTTCTAGCACGTGCTGGTAAAGCTTCATGCACTTTGTCCGAACAACCTG | 922 |
| gb:MT106052 | Organism:Severe | TGCATTAAGACCTTCTAGCACGTGCTGGTAAAGCTTCATGCACTTTGTCCGAACAACCTG | 922 |
| gb:LC522975 | Organism:Severe | TGCATTAAGACCTTCTAGCACGTGCTGGTAAAGCTTCATGCACTTTGTCCGAACAACCTG | 919 |
| gb:LC522973 | Organism:Severe | TGCATTAAGACCTTCTAGCACGTGCTGGTAAAGCTTCATGCACTTTGTCCGAACAACCTG | 919 |
| gb:LC522974 | Organism:Severe | TGCATTAAGACCTTCTAGCACGTGCTGGTAAAGCTTCATGCACTTTGTCCGAACAACCTG | 919 |
| gb:MN985325 | Organism:Severe | TGCATTAAGACCTTCTAGCACGTGCTGGTAAAGCTTCATGCACTTTGTCCGAACAACCTG | 922 |
| gb:MT020881 | Organism:Severe | TGCATTAAGACCTTCTAGCACGTGCTGGTAAAGCTTCATGCACTTTGTCCGAACAACCTG | 922 |
| gb:MT020880 | Organism:Severe | TGCATTAAGACCTTCTAGCACGTGCTGGTAAAGCTTCATGCACTTTGTCCGAACAACCTG | 922 |
| gb:MT066175 | Organism:Severe | TGCATTAAGACCTTCTAGCACGTGCTGGTAAAGCTTCATGCACTTTGTCCGAACAACCTG | 922 |
| gb:MN997409 | Organism:Severe | TGCATTAAGACCTTCTAGCACGTGCTGGTAAAGCTTCATGCACTTTGTCCGAACAACCTG | 922 |
| gb:MN938384 | Organism:Severe | TGCATTAAGACCTTCTAGCACGTGCTGGTAAAGCTTCATGCACTTTGTCCGAACAACCTG | 890 |
| gb:MT044258 | Organism:Severe | TGCATTAAGACCTTCTAGCACGTGCTGGTAAAGCTTCATGCACTTTGTCCGAACAACCTG | 898 |
| gb:MT039890 | Organism:Severe | TGCATTAAGACCTTCTAGCACGTGCTGGTAAAGCTTCATGCACTTTGTCCGAACAACCTG | 922 |
| gb:MN988713 | Organism:Severe | TGCATTAAGACCTTCTAGCACGTGCTGGTAAAGCTTCATGCACTTTGTCCGAACAACCTG | 922 |
| gb:LC521925 | Organism:Severe | TGCATTAAGACCTTCTAGCACGTGCTGGTAAAGCTTCATGCACTTTGTCCGAACAACCTG | 895 |

|             |                 |                                                           |     |
|-------------|-----------------|-----------------------------------------------------------|-----|
| gb:MT093571 | Organism:Severe | TGCATTAAGACCTTCTAGCACGTGCTGGTAAAGCTTCATGCACTTTGTCCGAACAAC | 922 |
| gb:MT039887 | Organism:Severe | TGCATTAAGACCTTCTAGCACGTGCTGGTAAAGCTTCATGCACTTTGTCCGAACAAC | 922 |
| gb:MT019530 | Organism:Severe | TGCATTAAGACCTTCTAGCACGTGCTGGTAAAGCTTCATGCACTTTGTCCGAACAAC | 922 |
| gb:MT039888 | Organism:Severe | TGCATTAAGACCTTCTAGCACGTGCTGGTAAAGCTTCATGCACTTTGTCCGAACAAC | 922 |
| gb:LC522972 | Organism:Severe | TGCATTAAGACCTTCTAGCACGTGCTGGTAAAGCTTCATGCACTTTGTCCGAACAAC | 919 |
| gb:MT027063 | Organism:Severe | TGCATTAAGACCTTCTAGCACGTGCTGGTAAAGCTTCATGCACTTTGTCCGAACAAC | 922 |
| gb:MT027062 | Organism:Severe | TGCATTAAGACCTTCTAGCACGTGCTGGTAAAGCTTCATGCACTTTGTCCGAACAAC | 922 |
| gb:MT019529 | Organism:Severe | TGCATTAAGACCTTCTAGCACGTGCTGGTAAAGCTTCATGCACTTTGTCCGAACAAC | 922 |
| gb:MN996529 | Organism:Severe | TGCATTAAGACCTTCTAGCACGTGCTGGTAAAGCTTCATGCACTTTGTCCGAACAAC | 910 |
| gb:MN996531 | Organism:Severe | TGCATTAAGACCTTCTAGCACGTGCTGGTAAAGCTTCATGCACTTTGTCCGAACAAC | 909 |
| gb:MT066176 | Organism:Severe | TGCATTAAGACCTTCTAGCACGTGCTGGTAAAGCTTCATGCACTTTGTCCGAACAAC | 922 |
| gb:MT027064 | Organism:Severe | TGCATTAAGACCTTCTAGCACGTGCTGGTAAAGCTTCATGCACTTTGTCCGAACAAC | 922 |
| gb:MN994468 | Organism:Severe | TGCATTAAGACCTTCTAGCACGTGCTGGTAAAGCTTCATGCACTTTGTCCGAACAAC | 922 |
| gb:MT072688 | Organism:Severe | TGCATTAAGACCTTCTAGCACGTGCTGGTAAAGCTTCATGCACTTTGTCCGAACAAC | 907 |
| gb:MN996527 | Organism:Severe | TGCATTAAGACCTTCTAGCACGTGCTGGTAAAGCTTCATGCACTTTGTCCGAACAAC | 889 |
| gb:MT093631 | Organism:Severe | TGCATTAAGACCTTCTAGCACGTGCTGGTAAAGCTTCATGCACTTTGTCCGAACAAC | 960 |
| gb:MT106053 | Organism:Severe | TGCATTAAGACCTTCTAGCACGTGCTGGTAAAGCTTCATGCACTTTGTCCGAACAAC | 922 |
| gb:MT019533 | Organism:Severe | TGCATTAAGACCTTCTAGCACGTGCTGGTAAAGCTTCATGCACTTTGTCCGAACAAC | 922 |
| gb:MT019531 | Organism:Severe | TGCATTAAGACCTTCTAGCACGTGCTGGTAAAGCTTCATGCACTTTGTCCGAACAAC | 922 |
| gb:MN996528 | Organism:Severe | TGCATTAAGACCTTCTAGCACGTGCTGGTAAAGCTTCATGCACTTTGTCCGAACAAC | 922 |
| gb:MN996530 | Organism:Severe | TGCATTAAGACCTTCTAGCACGTGCTGGTAAAGCTTCATGCACTTTGTCCGAACAAC | 908 |
| gb:MN908947 | Organism:Severe | TGCATTAAGACCTTCTAGCACGTGCTGGTAAAGCTTCATGCACTTTGTCCGAACAAC | 922 |
| gb:MT019532 | Organism:Severe | TGCATTAAGACCTTCTAGCACGTGCTGGTAAAGCTTCATGCACTTTGTCCGAACAAC | 922 |

\*\*\*\*\*

|             |                 |                                                              |      |
|-------------|-----------------|--------------------------------------------------------------|------|
| gb:MT020781 | Organism:Severe | GACTTTATTGACACTAAGAGGGGTGTATACTGCTGCCGTGAACATGAGCATGAAATTGCT | 970  |
| gb:MT007544 | Organism:Severe | GACTTTATTGACACTAAGAGGGGTGTATACTGCTGCCGTGAACATGAGCATGAAATTGCT | 982  |
| gb:MN994467 | Organism:Severe | GACTTTATTGACACTAAGAGGGGTGTATACTGCTGCCGTGAACATGAGCATGAAATTGCT | 982  |
| gb:MT044257 | Organism:Severe | GACTTTATTGACACTAAGAGGGGTGTATACTGCTGCCGTGAACATGAGCATGAAATTGCT | 982  |
| gb:MT106054 | Organism:Severe | GACTTTATTGACACTAAGAGGGGTGTATACTGCTGCCGTGAACATGAGCATGAAATTGCT | 982  |
| gb:MT049951 | Organism:Severe | GACTTTATTGACACTAAGAGGGGTGTATACTGCTGCCGTGAACATGAGCATGAAATTGCT | 982  |
| gb:MN975262 | Organism:Severe | GACTTTATTGACACTAAGAGGGGTGTATACTGCTGCCGTGAACATGAGCATGAAATTGCT | 982  |
| gb:MT106052 | Organism:Severe | GACTTTATTGACACTAAGAGGGGTGTATACTGCTGCCGTGAACATGAGCATGAAATTGCT | 982  |
| gb:LC522975 | Organism:Severe | GACTTTATTGACACTAAGAGGGGTGTATACTGCTGCCGTGAACATGAGCATGAAATTGCT | 979  |
| gb:LC522973 | Organism:Severe | GACTTTATTGACACTAAGAGGGGTGTATACTGCTGCCGTGAACATGAGCATGAAATTGCT | 979  |
| gb:LC522974 | Organism:Severe | GACTTTATTGACACTAAGAGGGGTGTATACTGCTGCCGTGAACATGAGCATGAAATTGCT | 979  |
| gb:MN985325 | Organism:Severe | GACTTTATTGACACTAAGAGGGGTGTATACTGCTGCCGTGAACATGAGCATGAAATTGCT | 982  |
| gb:MT020881 | Organism:Severe | GACTTTATTGACACTAAGAGGGGTGTATACTGCTGCCGTGAACATGAGCATGAAATTGCT | 982  |
| gb:MT020880 | Organism:Severe | GACTTTATTGACACTAAGAGGGGTGTATACTGCTGCCGTGAACATGAGCATGAAATTGCT | 982  |
| gb:MT066175 | Organism:Severe | GACTTTATTGACACTAAGAGGGGTGTATACTGCTGCCGTGAACATGAGCATGAAATTGCT | 982  |
| gb:MN997409 | Organism:Severe | GACTTTATTGACACTAAGAGGGGTGTATACTGCTGCCGTGAACATGAGCATGAAATTGCT | 982  |
| gb:MN938384 | Organism:Severe | GACTTTATTGACACTAAGAGGGGTGTATACTGCTGCCGTGAACATGAGCATGAAATTGCT | 950  |
| gb:MT044258 | Organism:Severe | GACTTTATTGACACTAAGAGGGGTGTATACTGCTGCCGTGAACATGAGCATGAAATTGCT | 958  |
| gb:MT039890 | Organism:Severe | GACTTTATTGACACTAAGAGGGGTGTATACTGCTGCCGTGAACATGAGCATGAAATTGCT | 982  |
| gb:MN988713 | Organism:Severe | GACTTTATTGACACTAAGAGGGGTGTATACTGCTGCCGTGAACATGAGCATGAAATTGCT | 982  |
| gb:LC521925 | Organism:Severe | GACTTTATTGACACTAAGAGGGGTGTATACTGCTGCCGTGAACATGAGCATGAAATTGCT | 955  |
| gb:MT093571 | Organism:Severe | GACTTTATTGACACTAAGAGGGGTGTATACTGCTGCCGTGAACATGAGCATGAAATTGCT | 982  |
| gb:MT039887 | Organism:Severe | GACTTTATTGACACTAAGAGGGGTGTATACTGCTGCCGTGAACATGAGCATGAAATTGCT | 982  |
| gb:MT019530 | Organism:Severe | GACTTTATTGACACTAAGAGGGGTGTATACTGCTGCCGTGAACATGAGCATGAAATTGCT | 982  |
| gb:MT039888 | Organism:Severe | GACTTTATTGACACTAAGAGGGGTGTATACTGCTGCCGTGAACATGAGCATGAAATTGCT | 982  |
| gb:LC522972 | Organism:Severe | GACTTTATTGACACTAAGAGGGGTGTATACTGCTGCCGTGAACATGAGCATGAAATTGCT | 979  |
| gb:MT027063 | Organism:Severe | GACTTTATTGACACTAAGAGGGGTGTATACTGCTGCCGTGAACATGAGCATGAAATTGCT | 982  |
| gb:MT027062 | Organism:Severe | GACTTTATTGACACTAAGAGGGGTGTATACTGCTGCCGTGAACATGAGCATGAAATTGCT | 982  |
| gb:MT019529 | Organism:Severe | GACTTTATTGACACTAAGAGGGGTGTATACTGCTGCCGTGAACATGAGCATGAAATTGCT | 982  |
| gb:MN996529 | Organism:Severe | GACTTTATTGACACTAAGAGGGGTGTATACTGCTGCCGTGAACATGAGCATGAAATTGCT | 970  |
| gb:MN996531 | Organism:Severe | GACTTTATTGACACTAAGAGGGGTGTATACTGCTGCCGTGAACATGAGCATGAAATTGCT | 969  |
| gb:MT066176 | Organism:Severe | GACTTTATTGACACTAAGAGGGGTGTATACTGCTGCCGTGAACATGAGCATGAAATTGCT | 982  |
| gb:MT027064 | Organism:Severe | GACTTTATTGACACTAAGAGGGGTGTATACTGCTGCCGTGAACATGAGCATGAAATTGCT | 982  |
| gb:MN994468 | Organism:Severe | GACTTTATTGACACTAAGAGGGGTGTATACTGCTGCCGTGAACATGAGCATGAAATTGCT | 982  |
| gb:MT072688 | Organism:Severe | GACTTTATTGACACTAAGAGGGGTGTATACTGCTGCCGTGAACATGAGCATGAAATTGCT | 967  |
| gb:MN996527 | Organism:Severe | GACTTTATTGACACTAAGAGGGGTGTATACTGCTGCCGTGAACATGAGCATGAAATTGCT | 949  |
| gb:MT093631 | Organism:Severe | GACTTTATTGACACTAAGAGGGGTGTATACTGCTGCCGTGAACATGAGCATGAAATTGCT | 1020 |
| gb:MT106053 | Organism:Severe | GACTTTATTGACACTAAGAGGGGTGTATACTGCTGCCGTGAACATGAGCATGAAATTGCT | 982  |
| gb:MT019533 | Organism:Severe | GACTTTATTGACACTAAGAGGGGTGTATACTGCTGCCGTGAACATGAGCATGAAATTGCT | 982  |
| gb:MT019531 | Organism:Severe | GACTTTATTGACACTAAGAGGGGTGTATACTGCTGCCGTGAACATGAGCATGAAATTGCT | 982  |

|             |                 |                                                             |      |
|-------------|-----------------|-------------------------------------------------------------|------|
| gb:MN996528 | Organism:Severe | GACTTTATTGACACTAAGAGGGGTGATACTGCTGCCGTGAACATGAGCATGAAATTGCT | 982  |
| gb:MN996530 | Organism:Severe | GACTTTATTGACACTAAGAGGGGTGATACTGCTGCCGTGAACATGAGCATGAAATTGCT | 968  |
| gb:MN908947 | Organism:Severe | GACTTTATTGACACTAAGAGGGGTGATACTGCTGCCGTGAACATGAGCATGAAATTGCT | 982  |
| gb:MT019532 | Organism:Severe | GACTTTATTGACACTAAGAGGGGTGATACTGCTGCCGTGAACATGAGCATGAAATTGCT | 982  |
| *****       |                 |                                                             |      |
| gb:MT020781 | Organism:Severe | TGGTACACGGAACGTTCTGAAAAGAGCTATGAATTGCAGACACCTTTTGAAATTAATTG | 1030 |
| gb:MT007544 | Organism:Severe | TGGTACACGGAACGTTCTGAAAAGAGCTATGAATTGCAGACACCTTTTGAAATTAATTG | 1042 |
| gb:MN994467 | Organism:Severe | TGGTACACGGAACGTTCTGAAAAGAGCTATGAATTGCAGACACCTTTTGAAATTAATTG | 1042 |
| gb:MT044257 | Organism:Severe | TGGTACACGGAACGTTCTGAAAAGAGCTATGAATTGCAGACACCTTTTGAAATTAATTG | 1042 |
| gb:MT106054 | Organism:Severe | TGGTACACGGAACGTTCTGAAAAGAGCTATGAATTGCAGACACCTTTTGAAATTAATTG | 1042 |
| gb:MT049951 | Organism:Severe | TGGTACACGGAACGTTCTGAAAAGAGCTATGAATTGCAGACACCTTTTGAAATTAATTG | 1042 |
| gb:MN975262 | Organism:Severe | TGGTACACGGAACGTTCTGAAAAGAGCTATGAATTGCAGACACCTTTTGAAATTAATTG | 1042 |
| gb:MT106052 | Organism:Severe | TGGTACACGGAACGTTCTGAAAAGAGCTATGAATTGCAGACACCTTTTGAAATTAATTG | 1042 |
| gb:LC522975 | Organism:Severe | TGGTACACGGAACGTTCTGAAAAGAGCTATGAATTGCAGACACCTTTTGAAATTAATTG | 1039 |
| gb:LC522973 | Organism:Severe | TGGTACACGGAACGTTCTGAAAAGAGCTATGAATTGCAGACACCTTTTGAAATTAATTG | 1039 |
| gb:LC522974 | Organism:Severe | TGGTACACGGAACGTTCTGAAAAGAGCTATGAATTGCAGACACCTTTTGAAATTAATTG | 1039 |
| gb:MN985325 | Organism:Severe | TGGTACACGGAACGTTCTGAAAAGAGCTATGAATTGCAGACACCTTTTGAAATTAATTG | 1042 |
| gb:MT020881 | Organism:Severe | TGGTACACGGAACGTTCTGAAAAGAGCTATGAATTGCAGACACCTTTTGAAATTAATTG | 1042 |
| gb:MT020880 | Organism:Severe | TGGTACACGGAACGTTCTGAAAAGAGCTATGAATTGCAGACACCTTTTGAAATTAATTG | 1042 |
| gb:MT066175 | Organism:Severe | TGGTACACGGAACGTTCTGAAAAGAGCTATGAATTGCAGACACCTTTTGAAATTAATTG | 1042 |
| gb:MN997409 | Organism:Severe | TGGTACACGGAACGTTCTGAAAAGAGCTATGAATTGCAGACACCTTTTGAAATTAATTG | 1042 |
| gb:MN938384 | Organism:Severe | TGGTACACGGAACGTTCTGAAAAGAGCTATGAATTGCAGACACCTTTTGAAATTAATTG | 1010 |
| gb:MT044258 | Organism:Severe | TGGTACACGGAACGTTCTGAAAAGAGCTATGAATTGCAGACACCTTTTGAAATTAATTG | 1018 |
| gb:MT039890 | Organism:Severe | TGGTACACGGAACGTTCTGAAAAGAGCTATGAATTGCAGACACCTTTTGAAATTAATTG | 1042 |
| gb:MN988713 | Organism:Severe | TGGTACACGGAACGTTCTGAAAAGAGCTATGAATTGCAGACACCTTTTGAAATTAATTG | 1042 |
| gb:LC521925 | Organism:Severe | TGGTACACGGAACGTTCTGAAAAGAGCTATGAATTGCAGACACCTTTTGAAATTAATTG | 1015 |
| gb:MT093571 | Organism:Severe | TGGTACACGGAACGTTCTGAAAAGAGCTATGAATTGCAGACACCTTTTGAAATTAATTG | 1042 |
| gb:MT039887 | Organism:Severe | TGGTACACGGAACGTTCTGAAAAGAGCTATGAATTGCAGACACCTTTTGAAATTAATTG | 1042 |
| gb:MT019530 | Organism:Severe | TGGTACACGGAACGTTCTGAAAAGAGCTATGAATTGCAGACACCTTTTGAAATTAATTG | 1042 |
| gb:MT039888 | Organism:Severe | TGGTACACGGAACGTTCTGAAAAGAGCTATGAATTGCAGACACCTTTTGAAATTAATTG | 1042 |
| gb:LC522972 | Organism:Severe | TGGTACACGGAACGTTCTGAAAAGAGCTATGAATTGCAGACACCTTTTGAAATTAATTG | 1039 |
| gb:MT027063 | Organism:Severe | TGGTACACGGAACGTTCTGAAAAGAGCTATGAATTGCAGACACCTTTTGAAATTAATTG | 1042 |
| gb:MT027062 | Organism:Severe | TGGTACACGGAACGTTCTGAAAAGAGCTATGAATTGCAGACACCTTTTGAAATTAATTG | 1042 |
| gb:MT019529 | Organism:Severe | TGGTACACGGAACGTTCTGAAAAGAGCTATGAATTGCAGACACCTTTTGAAATTAATTG | 1042 |
| gb:MN996529 | Organism:Severe | TGGTACACGGAACGTTCTGAAAAGAGCTATGAATTGCAGACACCTTTTGAAATTAATTG | 1030 |
| gb:MN996531 | Organism:Severe | TGGTACACGGAACGTTCTGAAAAGAGCTATGAATTGCAGACACCTTTTGAAATTAATTG | 1029 |
| gb:MT066176 | Organism:Severe | TGGTACACGGAACGTTCTGAAAAGAGCTATGAATTGCAGACACCTTTTGAAATTAATTG | 1042 |
| gb:MT027064 | Organism:Severe | TGGTACACGGAACGTTCTGAAAAGAGCTATGAATTGCAGACACCTTTTGAAATTAATTG | 1042 |
| gb:MN994468 | Organism:Severe | TGGTACACGGAACGTTCTGAAAAGAGCTATGAATTGCAGACACCTTTTGAAATTAATTG | 1042 |
| gb:MT072688 | Organism:Severe | TGGTACACGGAACGTTCTGAAAAGAGCTATGAATTGCAGACACCTTTTGAAATTAATTG | 1027 |
| gb:MN996527 | Organism:Severe | TGGTACACGGAACGTTCTGAAAAGAGCTATGAATTGCAGACACCTTTTGAAATTAATTG | 1009 |
| gb:MT093631 | Organism:Severe | TGGTACACGGAACGTTCTGAAAAGAGCTATGAATTGCAGACACCTTTTGAAATTAATTG | 1080 |
| gb:MT106053 | Organism:Severe | TGGTACACGGAACGTTCTGAAAAGAGCTATGAATTGCAGACACCTTTTGAAATTAATTG | 1042 |
| gb:MT019533 | Organism:Severe | TGGTACACGGAACGTTCTGAAAAGAGCTATGAATTGCAGACACCTTTTGAAATTAATTG | 1042 |
| gb:MT019531 | Organism:Severe | TGGTACACGGAACGTTCTGAAAAGAGCTATGAATTGCAGACACCTTTTGAAATTAATTG | 1042 |
| gb:MN996528 | Organism:Severe | TGGTACACGGAACGTTCTGAAAAGAGCTATGAATTGCAGACACCTTTTGAAATTAATTG | 1042 |
| gb:MN996530 | Organism:Severe | TGGTACACGGAACGTTCTGAAAAGAGCTATGAATTGCAGACACCTTTTGAAATTAATTG | 1028 |
| gb:MN908947 | Organism:Severe | TGGTACACGGAACGTTCTGAAAAGAGCTATGAATTGCAGACACCTTTTGAAATTAATTG | 1042 |
| gb:MT019532 | Organism:Severe | TGGTACACGGAACGTTCTGAAAAGAGCTATGAATTGCAGACACCTTTTGAAATTAATTG | 1042 |
| *****       |                 |                                                             |      |
| gb:MT020781 | Organism:Severe | GCAAAGAAATTTGACACCTTCAATGGGGAATGTCCAAATTTGTATTTCCCTTAAATTCC | 1090 |
| gb:MT007544 | Organism:Severe | GCAAAGAAATTTGACACCTTCAATGGGGAATGTCCAAATTTGTATTTCCCTTAAATTCC | 1102 |
| gb:MN994467 | Organism:Severe | GCAAAGAAATTTGACACCTTCAATGGGGAATGTCCAAATTTGTATTTCCCTTAAATTCC | 1102 |
| gb:MT044257 | Organism:Severe | GCAAAGAAATTTGACACCTTCAATGGGGAATGTCCAAATTTGTATTTCCCTTAAATTCC | 1102 |
| gb:MT106054 | Organism:Severe | GCAAAGAAATTTGACACCTTCAATGGGGAATGTCCAAATTTGTATTTCCCTTAAATTCC | 1102 |
| gb:MT049951 | Organism:Severe | GCAAAGAAATTTGACACCTTCAATGGGGAATGTCCAAATTTGTATTTCCCTTAAATTCC | 1102 |
| gb:MN975262 | Organism:Severe | GCAAAGAAATTTGACACCTTCAATGGGGAATGTCCAAATTTGTATTTCCCTTAAATTCC | 1102 |
| gb:MT106052 | Organism:Severe | GCAAAGAAATTTGACACCTTCAATGGGGAATGTCCAAATTTGTATTTCCCTTAAATTCC | 1102 |
| gb:LC522975 | Organism:Severe | GCAAAGAAATTTGACACCTTCAATGGGGAATGTCCAAATTTGTATTTCCCTTAAATTCC | 1099 |
| gb:LC522973 | Organism:Severe | GCAAAGAAATTTGACACCTTCAATGGGGAATGTCCAAATTTGTATTTCCCTTAAATTCC | 1099 |
| gb:LC522974 | Organism:Severe | GCAAAGAAATTTGACACCTTCAATGGGGAATGTCCAAATTTGTATTTCCCTTAAATTCC | 1099 |
| gb:MN985325 | Organism:Severe | GCAAAGAAATTTGACACCTTCAATGGGGAATGTCCAAATTTGTATTTCCCTTAAATTCC | 1102 |
| gb:MT020881 | Organism:Severe | GCAAAGAAATTTGACACCTTCAATGGGGAATGTCCAAATTTGTATTTCCCTTAAATTCC | 1102 |

|             |                 |                                                             |      |
|-------------|-----------------|-------------------------------------------------------------|------|
| gb:MT020880 | Organism:Severe | GCAAAGAAATTTGACACCTTCAATGGGGAATGTCCAAATTTTGATTTCCCTTAAATTCC | 1102 |
| gb:MT066175 | Organism:Severe | GCAAAGAAATTTGACACCTTCAATGGGGAATGTCCAAATTTTGATTTCCCTTAAATTCC | 1102 |
| gb:MN997409 | Organism:Severe | GCAAAGAAATTTGACACCTTCAATGGGGAATGTCCAAATTTTGATTTCCCTTAAATTCC | 1102 |
| gb:MN938384 | Organism:Severe | GCAAAGAAATTTGACACCTTCAATGGGGAATGTCCAAATTTTGATTTCCCTTAAATTCC | 1070 |
| gb:MT044258 | Organism:Severe | GCAAAGAAATTTGACACCTTCAATGGGGAATGTCCAAATTTTGATTTCCCTTAAATTCC | 1078 |
| gb:MT039890 | Organism:Severe | GCAAAGAAATTTGACACCTTCAATGGGGAATGTCCAAATTTTGATTTCCCTTAAATTCC | 1102 |
| gb:MN988713 | Organism:Severe | GCAAAGAAATTTGACACCTTCAATGGGGAATGTCCAAATTTTGATTTCCCTTAAATTCC | 1102 |
| gb:LC521925 | Organism:Severe | GCAAAGAAATTTGACACCTTCAATGGGGAATGTCCAAATTTTGATTTCCCTTAAATTCC | 1075 |
| gb:MT093571 | Organism:Severe | GCAAAGAAATTTGACACCTTCAATGGGGAATGTCCAAATTTTGATTTCCCTTAAATTCC | 1102 |
| gb:MT039887 | Organism:Severe | GCAAAGAAATTTGACACCTTCAATGGGGAATGTCCAAATTTTGATTTCCCTTAAATTCC | 1102 |
| gb:MT019530 | Organism:Severe | GCAAAGAAATTTGACACCTTCAATGGGGAATGTCCAAATTTTGATTTCCCTTAAATTCC | 1102 |
| gb:MT039888 | Organism:Severe | GCAAAGAAATTTGACACCTTCAATGGGGAATGTCCAAATTTTGATTTCCCTTAAATTCC | 1102 |
| gb:LC522972 | Organism:Severe | GCAAAGAAATTTGACACCTTCAATGGGGAATGTCCAAATTTTGATTTCCCTTAAATTCC | 1099 |
| gb:MT027063 | Organism:Severe | GCAAAGAAATTTGACACCTTCAATGGGGAATGTCCAAATTTTGATTTCCCTTAAATTCC | 1102 |
| gb:MT027062 | Organism:Severe | GCAAAGAAATTTGACACCTTCAATGGGGAATGTCCAAATTTTGATTTCCCTTAAATTCC | 1102 |
| gb:MT019529 | Organism:Severe | GCAAAGAAATTTGACACCTTCAATGGGGAATGTCCAAATTTTGATTTCCCTTAAATTCC | 1102 |
| gb:MN996529 | Organism:Severe | GCAAAGAAATTTGACACCTTCAATGGGGAATGTCCAAATTTTGATTTCCCTTAAATTCC | 1090 |
| gb:MN996531 | Organism:Severe | GCAAAGAAATTTGACACCTTCAATGGGGAATGTCCAAATTTTGATTTCCCTTAAATTCC | 1089 |
| gb:MT066176 | Organism:Severe | GCAAAGAAATTTGACACCTTCAATGGGGAATGTCCAAATTTTGATTTCCCTTAAATTCC | 1102 |
| gb:MT027064 | Organism:Severe | GCAAAGAAATTTGACACCTTCAATGGGGAATGTCCAAATTTTGATTTCCCTTAAATTCC | 1102 |
| gb:MN994468 | Organism:Severe | GCAAAGAAATTTGACACCTTCAATGGGGAATGTCCAAATTTTGATTTCCCTTAAATTCC | 1102 |
| gb:MT072688 | Organism:Severe | GCAAAGAAATTTGACACCTTCAATGGGGAATGTCCAAATTTTGATTTCCCTTAAATTCC | 1087 |
| gb:MN996527 | Organism:Severe | GCAAAGAAATTTGACACCTTCAATGGGGAATGTCCAAATTTTGATTTCCCTTAAATTCC | 1069 |
| gb:MT093631 | Organism:Severe | GCAAAGAAATTTGACACCTTCAATGGGGAATGTCCAAATTTTGATTTCCCTTAAATTCC | 1140 |
| gb:MT106053 | Organism:Severe | GCAAAGAAATTTGACACCTTCAATGGGGAATGTCCAAATTTTGATTTCCCTTAAATTCC | 1102 |
| gb:MT019533 | Organism:Severe | GCAAAGAAATTTGACACCTTCAATGGGGAATGTCCAAATTTTGATTTCCCTTAAATTCC | 1102 |
| gb:MT019531 | Organism:Severe | GCAAAGAAATTTGACACCTTCAATGGGGAATGTCCAAATTTTGATTTCCCTTAAATTCC | 1102 |
| gb:MN996528 | Organism:Severe | GCAAAGAAATTTGACACCTTCAATGGGGAATGTCCAAATTTTGATTTCCCTTAAATTCC | 1102 |
| gb:MN996530 | Organism:Severe | GCAAAGAAATTTGACACCTTCAATGGGGAATGTCCAAATTTTGATTTCCCTTAAATTCC | 1088 |
| gb:MN908947 | Organism:Severe | GCAAAGAAATTTGACACCTTCAATGGGGAATGTCCAAATTTTGATTTCCCTTAAATTCC | 1102 |
| gb:MT019532 | Organism:Severe | GCAAAGAAATTTGACACCTTCAATGGGGAATGTCCAAATTTTGATTTCCCTTAAATTCC | 1102 |

\*\*\*\*\*

|             |                 |                                                              |      |
|-------------|-----------------|--------------------------------------------------------------|------|
| gb:MT020781 | Organism:Severe | ATAATCAAGACTATTCAACCAAGGGTTGAAAAGAAAAAGCTTGATGGCTTTATGGGTAGA | 1150 |
| gb:MT007544 | Organism:Severe | ATAATCAAGACTATTCAACCAAGGGTTGAAAAGAAAAAGCTTGATGGCTTTATGGGTAGA | 1162 |
| gb:MN994467 | Organism:Severe | ATAATCAAGACTATTCAACCAAGGGTTGAAAAGAAAAAGCTTGATGGCTTTATGGGTAGA | 1162 |
| gb:MT044257 | Organism:Severe | ATAATCAAGACTATTCAACCAAGGGTTGAAAAGAAAAAGCTTGATGGCTTTATGGGTAGA | 1162 |
| gb:MT106054 | Organism:Severe | ATAATCAAGACTATTCAACCAAGGGTTGAAAAGAAAAAGCTTGATGGCTTTATGGGTAGA | 1162 |
| gb:MT049951 | Organism:Severe | ATAATCAAGACTATTCAACCAAGGGTTGAAAAGAAAAAGCTTGATGGCTTTATGGGTAGA | 1162 |
| gb:MN975262 | Organism:Severe | ATAATCAAGACTATTCAACCAAGGGTTGAAAAGAAAAAGCTTGATGGCTTTATGGGTAGA | 1162 |
| gb:MT106052 | Organism:Severe | ATAATCAAGACTATTCAACCAAGGGTTGAAAAGAAAAAGCTTGATGGCTTTATGGGTAGA | 1162 |
| gb:LC522975 | Organism:Severe | ATAATCAAGACTATTCAACCAAGGGTTGAAAAGAAAAAGCTTGATGGCTTTATGGGTAGA | 1159 |
| gb:LC522973 | Organism:Severe | ATAATCAAGACTATTCAACCAAGGGTTGAAAAGAAAAAGCTTGATGGCTTTATGGGTAGA | 1159 |
| gb:LC522974 | Organism:Severe | ATAATCAAGACTATTCAACCAAGGGTTGAAAAGAAAAAGCTTGATGGCTTTATGGGTAGA | 1159 |
| gb:MN985325 | Organism:Severe | ATAATCAAGACTATTCAACCAAGGGTTGAAAAGAAAAAGCTTGATGGCTTTATGGGTAGA | 1162 |
| gb:MT020881 | Organism:Severe | ATAATCAAGACTATTCAACCAAGGGTTGAAAAGAAAAAGCTTGATGGCTTTATGGGTAGA | 1162 |
| gb:MT020880 | Organism:Severe | ATAATCAAGACTATTCAACCAAGGGTTGAAAAGAAAAAGCTTGATGGCTTTATGGGTAGA | 1162 |
| gb:MT066175 | Organism:Severe | ATAATCAAGACTATTCAACCAAGGGTTGAAAAGAAAAAGCTTGATGGCTTTATGGGTAGA | 1162 |
| gb:MN997409 | Organism:Severe | ATAATCAAGACTATTCAACCAAGGGTTGAAAAGAAAAAGCTTGATGGCTTTATGGGTAGA | 1162 |
| gb:MN938384 | Organism:Severe | ATAATCAAGACTATTCAACCAAGGGTTGAAAAGAAAAAGCTTGATGGCTTTATGGGTAGA | 1130 |
| gb:MT044258 | Organism:Severe | ATAATCAAGACTATTCAACCAAGGGTTGAAAAGAAAAAGCTTGATGGCTTTATGGGTAGA | 1138 |
| gb:MT039890 | Organism:Severe | ATAATCAAGACTATTCAACCAAGGGTTGAAAAGAAAAAGCTTGATGGCTTTATGGGTAGA | 1162 |
| gb:MN988713 | Organism:Severe | ATAATCAAGACTATTCAACCAAGGGTTGAAAAGAAAAAGCTTGATGGCTTTATGGGTAGA | 1162 |
| gb:LC521925 | Organism:Severe | ATAATCAAGACTATTCAACCAAGGGTTGAAAAGAAAAAGCTTGATGGCTTTATGGGTAGA | 1135 |
| gb:MT093571 | Organism:Severe | ATAATCAAGACTATTCAACCAAGGGTTGAAAAGAAAAAGCTTGATGGCTTTATGGGTAGA | 1162 |
| gb:MT039887 | Organism:Severe | ATAATCAAGACTATTCAACCAAGGGTTGAAAAGAAAAAGCTTGATGGCTTTATGGGTAGA | 1162 |
| gb:MT019530 | Organism:Severe | ATAATCAAGACTATTCAACCAAGGGTTGAAAAGAAAAAGCTTGATGGCTTTATGGGTAGA | 1162 |
| gb:MT039888 | Organism:Severe | ATAATCAAGACTATTCAACCAAGGGTTGAAAAGAAAAAGCTTGATGGCTTTATGGGTAGA | 1162 |
| gb:LC522972 | Organism:Severe | ATAATCAAGACTATTCAACCAAGGGTTGAAAAGAAAAAGCTTGATGGCTTTATGGGTAGA | 1159 |
| gb:MT027063 | Organism:Severe | ATAATCAAGACTATTCAACCAAGGGTTGAAAAGAAAAAGCTTGATGGCTTTATGGGTAGA | 1162 |
| gb:MT027062 | Organism:Severe | ATAATCAAGACTATTCAACCAAGGGTTGAAAAGAAAAAGCTTGATGGCTTTATGGGTAGA | 1162 |
| gb:MT019529 | Organism:Severe | ATAATCAAGACTATTCAACCAAGGGTTGAAAAGAAAAAGCTTGATGGCTTTATGGGTAGA | 1162 |
| gb:MN996529 | Organism:Severe | ATAATCAAGACTATTCAACCAAGGGTTGAAAAGAAAAAGCTTGATGGCTTTATGGGTAGA | 1150 |
| gb:MN996531 | Organism:Severe | ATAATCAAGACTATTCAACCAAGGGTTGAAAAGAAAAAGCTTGATGGCTTTATGGGTAGA | 1149 |
| gb:MT066176 | Organism:Severe | ATAATCAAGACTATTCAACCAAGGGTTGAAAAGAAAAAGCTTGATGGCTTTATGGGTAGA | 1162 |

|             |                 |                                                              |      |
|-------------|-----------------|--------------------------------------------------------------|------|
| gb:MT027064 | Organism:Severe | ATAATCAAGACTATTCAACCAAGGGTTGAAAAGAAAAAGCTTGATGGCTTTATGGGTAGA | 1162 |
| gb:MN994468 | Organism:Severe | ATAATCAAGACTATTCAACCAAGGGTTGAAAAGAAAAAGCTTGATGGCTTTATGGGTAGA | 1162 |
| gb:MT072688 | Organism:Severe | ATAATCAAGACTATTCAACCAAGGGTTGAAAAGAAAAAGCTTGATGGCTTTATGGGTAGA | 1147 |
| gb:MN996527 | Organism:Severe | ATAATCAAGACTATTCAACCAAGGGTTGAAAAGAAAAAGCTTGATGGCTTTATGGGTAGA | 1129 |
| gb:MT093631 | Organism:Severe | ATAATCAAGACTATTCAACCAAGGGTTGAAAAGAAAAAGCTTGATGGCTTTATGGGTAGA | 1200 |
| gb:MT106053 | Organism:Severe | ATAATCAAGACTATTCAACCAAGGGTTGAAAAGAAAAAGCTTGATGGCTTTATGGGTAGA | 1162 |
| gb:MT019533 | Organism:Severe | ATAATCAAGACTATTCAACCAAGGGTTGAAAAGAAAAAGCTTGATGGCTTTATGGGTAGA | 1162 |
| gb:MT019531 | Organism:Severe | ATAATCAAGACTATTCAACCAAGGGTTGAAAAGAAAAAGCTTGATGGCTTTATGGGTAGA | 1162 |
| gb:MN996528 | Organism:Severe | ATAATCAAGACTATTCAACCAAGGGTTGAAAAGAAAAAGCTTGATGGCTTTATGGGTAGA | 1162 |
| gb:MN996530 | Organism:Severe | ATAATCAAGACTATTCAACCAAGGGTTGAAAAGAAAAAGCTTGATGGCTTTATGGGTAGA | 1148 |
| gb:MN908947 | Organism:Severe | ATAATCAAGACTATTCAACCAAGGGTTGAAAAGAAAAAGCTTGATGGCTTTATGGGTAGA | 1162 |
| gb:MT019532 | Organism:Severe | ATAATCAAGACTATTCAACCAAGGGTTGAAAAGAAAAAGCTTGATGGCTTTATGGGTAGA | 1162 |

\*\*\*\*\*

|             |                 |                                                              |      |
|-------------|-----------------|--------------------------------------------------------------|------|
| gb:MT020781 | Organism:Severe | ATTCGATCTGTCTATCCAGTTGCGTCACCAAATGAATGCAACCAAATGTGCCTTTCAACT | 1210 |
| gb:MT007544 | Organism:Severe | ATTCGATCTGTCTATCCAGTTGCGTCACCAAATGAATGCAACCAAATGTGCCTTTCAACT | 1222 |
| gb:MN994467 | Organism:Severe | ATTCGATCTGTCTATCCAGTTGCGTCACCAAATGAATGCAACCAAATGTGCCTTTCAACT | 1222 |
| gb:MT044257 | Organism:Severe | ATTCGATCTGTCTATCCAGTTGCGTCACCAAATGAATGCAACCAAATGTGCCTTTCAACT | 1222 |
| gb:MT106054 | Organism:Severe | ATTCGATCTGTCTATCCAGTTGCGTCACCAAATGAATGCAACCAAATGTGCCTTTCAACT | 1222 |
| gb:MT049951 | Organism:Severe | ATTCGATCTGTCTATCCAGTTGCGTCACCAAATGAATGCAACCAAATGTGCCTTTCAACT | 1222 |
| gb:MN975262 | Organism:Severe | ATTCGATCTGTCTATCCAGTTGCGTCACCAAATGAATGCAACCAAATGTGCCTTTCAACT | 1222 |
| gb:MT106052 | Organism:Severe | ATTCGATCTGTCTATCCAGTTGCGTCACCAAATGAATGCAACCAAATGTGCCTTTCAACT | 1222 |
| gb:LC522975 | Organism:Severe | ATTCGATCTGTCTATCCAGTTGCGTCACCAAATGAATGCAACCAAATGTGCCTTTCAACT | 1219 |
| gb:LC522973 | Organism:Severe | ATTCGATCTGTCTATCCAGTTGCGTCACCAAATGAATGCAACCAAATGTGCCTTTCAACT | 1219 |
| gb:LC522974 | Organism:Severe | ATTCGATCTGTCTATCCAGTTGCGTCACCAAATGAATGCAACCAAATGTGCCTTTCAACT | 1219 |
| gb:MN985325 | Organism:Severe | ATTCGATCTGTCTATCCAGTTGCGTCACCAAATGAATGCAACCAAATGTGCCTTTCAACT | 1222 |
| gb:MT020881 | Organism:Severe | ATTCGATCTGTCTATCCAGTTGCGTCACCAAATGAATGCAACCAAATGTGCCTTTCAACT | 1222 |
| gb:MT020880 | Organism:Severe | ATTCGATCTGTCTATCCAGTTGCGTCACCAAATGAATGCAACCAAATGTGCCTTTCAACT | 1222 |
| gb:MT066175 | Organism:Severe | ATTCGATCTGTCTATCCAGTTGCGTCACCAAATGAATGCAACCAAATGTGCCTTTCAACT | 1222 |
| gb:MN997409 | Organism:Severe | ATTCGATCTGTCTATCCAGTTGCGTCACCAAATGAATGCAACCAAATGTGCCTTTCAACT | 1222 |
| gb:MN938384 | Organism:Severe | ATTCGATCTGTCTATCCAGTTGCGTCACCAAATGAATGCAACCAAATGTGCCTTTCAACT | 1190 |
| gb:MT044258 | Organism:Severe | ATTCGATCTGTCTATCCAGTTGCGTCACCAAATGAATGCAACCAAATGTGCCTTTCAACT | 1198 |
| gb:MT039890 | Organism:Severe | ATTCGATCTGTCTATCCAGTTGCGTCACCAAATGAATGCAACCAAATGTGCCTTTCAACT | 1222 |
| gb:MN988713 | Organism:Severe | ATTCGATCTGTCTATCCAGTTGCGTCACCAAATGAATGCAACCAAATGTGCCTTTCAACT | 1222 |
| gb:LC521925 | Organism:Severe | ATTCGATCTGTCTATCCAGTTGCGTCACCAAATGAATGCAACCAAATGTGCCTTTCAACT | 1195 |
| gb:MT093571 | Organism:Severe | ATTCGATCTGTCTATCCAGTTGCGTCACCAAATGAATGCAACCAAATGTGCCTTTCAACT | 1222 |
| gb:MT039887 | Organism:Severe | ATTCGATCTGTCTATCCAGTTGCGTCACCAAATGAATGCAACCAAATGTGCCTTTCAACT | 1222 |
| gb:MT019530 | Organism:Severe | ATTCGATCTGTCTATCCAGTTGCGTCACCAAATGAATGCAACCAAATGTGCCTTTCAACT | 1222 |
| gb:MT039888 | Organism:Severe | ATTCGATCTGTCTATCCAGTTGCGTCACCAAATGAATGCAACCAAATGTGCCTTTCAACT | 1222 |
| gb:LC522972 | Organism:Severe | ATTCGATCTGTCTATCCAGTTGCGTCACCAAATGAATGCAACCAAATGTGCCTTTCAACT | 1219 |
| gb:MT027063 | Organism:Severe | ATTCGATCTGTCTATCCAGTTGCGTCACCAAATGAATGCAACCAAATGTGCCTTTCAACT | 1222 |
| gb:MT027062 | Organism:Severe | ATTCGATCTGTCTATCCAGTTGCGTCACCAAATGAATGCAACCAAATGTGCCTTTCAACT | 1222 |
| gb:MT019529 | Organism:Severe | ATTCGATCTGTCTATCCAGTTGCGTCACCAAATGAATGCAACCAAATGTGCCTTTCAACT | 1222 |
| gb:MN996529 | Organism:Severe | ATTCGATCTGTCTATCCAGTTGCGTCACCAAATGAATGCAACCAAATGTGCCTTTCAACT | 1210 |
| gb:MN996531 | Organism:Severe | ATTCGATCTGTCTATCCAGTTGCGTCACCAAATGAATGCAACCAAATGTGCCTTTCAACT | 1209 |
| gb:MT066176 | Organism:Severe | ATTCGATCTGTCTATCCAGTTGCGTCACCAAATGAATGCAACCAAATGTGCCTTTCAACT | 1222 |
| gb:MT027064 | Organism:Severe | ATTCGATCTGTCTATCCAGTTGCGTCACCAAATGAATGCAACCAAATGTGCCTTTCAACT | 1222 |
| gb:MN994468 | Organism:Severe | ATTCGATCTGTCTATCCAGTTGCGTCACCAAATGAATGCAACCAAATGTGCCTTTCAACT | 1222 |
| gb:MT072688 | Organism:Severe | ATTCGATCTGTCTATCCAGTTGCGTCACCAAATGAATGCAACCAAATGTGCCTTTCAACT | 1207 |
| gb:MN996527 | Organism:Severe | ATTCGATCTGTCTATCCAGTTGCGTCACCAAATGAATGCAACCAAATGTGCCTTTCAACT | 1189 |
| gb:MT093631 | Organism:Severe | ATTCGATCTGTCTATCCAGTTGCGTCACCAAATGAATGCAACCAAATGTGCCTTTCAACT | 1260 |
| gb:MT106053 | Organism:Severe | ATTCGATCTGTCTATCCAGTTGCGTCACCAAATGAATGCAACCAAATGTGCCTTTCAACT | 1222 |
| gb:MT019533 | Organism:Severe | ATTCGATCTGTCTATCCAGTTGCGTCACCAAATGAATGCAACCAAATGTGCCTTTCAACT | 1222 |
| gb:MT019531 | Organism:Severe | ATTCGATCTGTCTATCCAGTTGCGTCACCAAATGAATGCAACCAAATGTGCCTTTCAACT | 1222 |
| gb:MN996528 | Organism:Severe | ATTCGATCTGTCTATCCAGTTGCGTCACCAAATGAATGCAACCAAATGTGCCTTTCAACT | 1222 |
| gb:MN996530 | Organism:Severe | ATTCGATCTGTCTATCCAGTTGCGTCACCAAATGAATGCAACCAAATGTGCCTTTCAACT | 1208 |
| gb:MN908947 | Organism:Severe | ATTCGATCTGTCTATCCAGTTGCGTCACCAAATGAATGCAACCAAATGTGCCTTTCAACT | 1222 |
| gb:MT019532 | Organism:Severe | ATTCGATCTGTCTATCCAGTTGCGTCACCAAATGAATGCAACCAAATGTGCCTTTCAACT | 1222 |

\*\*\*\*\*

|             |                 |                                                              |      |
|-------------|-----------------|--------------------------------------------------------------|------|
| gb:MT020781 | Organism:Severe | CTCATGAAGTGTGATCATTGTGGTAAAACCTTCATGGCAGACGGGCGATTTTGTAAAGCC | 1270 |
| gb:MT007544 | Organism:Severe | CTCATGAAGTGTGATCATTGTGGTAAAACCTTCATGGCAGACGGGCGATTTTGTAAAGCC | 1282 |
| gb:MN994467 | Organism:Severe | CTCATGAAGTGTGATCATTGTGGTAAAACCTTCATGGCAGACGGGCGATTTTGTAAAGCC | 1282 |
| gb:MT044257 | Organism:Severe | CTCATGAAGTGTGATCATTGTGGTAAAACCTTCATGGCAGACGGGCGATTTTGTAAAGCC | 1282 |
| gb:MT106054 | Organism:Severe | CTCATGAAGTGTGATCATTGTGGTAAAACCTTCATGGCAGACGGGCGATTTTGTAAAGCC | 1282 |





|             |                 |                                                              |      |
|-------------|-----------------|--------------------------------------------------------------|------|
| gb:MT039888 | Organism:Severe | ACTTGCGAATTTTGTGGCACTGAGAATTTGACTAAAGAAGGTGCCACTACTTGTGGTTAC | 1342 |
| gb:LC522972 | Organism:Severe | ACTTGCGAATTTTGTGGCACTGAGAATTTGACTAAAGAAGGTGCCACTACTTGTGGTTAC | 1339 |
| gb:MT027063 | Organism:Severe | ACTTGCGAATTTTGTGGCACTGAGAATTTGACTAAAGAAGGTGCCACTACTTGTGGTTAC | 1342 |
| gb:MT027062 | Organism:Severe | ACTTGCGAATTTTGTGGCACTGAGAATTTGACTAAAGAAGGTGCCACTACTTGTGGTTAC | 1342 |
| gb:MT019529 | Organism:Severe | ACTTGCGAATTTTGTGGCACTGAGAATTTGACTAAAGAAGGTGCCACTACTTGTGGTTAC | 1342 |
| gb:MN996529 | Organism:Severe | ACTTGCGAATTTTGTGGCACTGAGAATTTGACTAAAGAAGGTGCCACTACTTGTGGTTAC | 1330 |
| gb:MN996531 | Organism:Severe | ACTTGCGAATTTTGTGGCACTGAGAATTTGACTAAAGAAGGTGCCACTACTTGTGGTTAC | 1329 |
| gb:MT066176 | Organism:Severe | ACTTGCGAATTTTGTGGCACTGAGAATTTGACTAAAGAAGGTGCCACTACTTGTGGTTAC | 1342 |
| gb:MT027064 | Organism:Severe | ACTTGCGAATTTTGTGGCACTGAGAATTTGACTAAAGAAGGTGCCACTACTTGTGGTTAC | 1342 |
| gb:MN994468 | Organism:Severe | ACTTGCGAATTTTGTGGCACTGAGAATTTGACTAAAGAAGGTGCCACTACTTGTGGTTAC | 1342 |
| gb:MT072688 | Organism:Severe | ACTTGCGAATTTTGTGGCACTGAGAATTTGACTAAAGAAGGTGCCACTACTTGTGGTTAC | 1327 |
| gb:MN996527 | Organism:Severe | ACTTGCGAATTTTGTGGCACTGAGAATTTGACTAAAGAAGGTGCCACTACTTGTGGTTAC | 1309 |
| gb:MT093631 | Organism:Severe | ACTTGCGAATTTTGTGGCACTGAGAATTTGACTAAAGAAGGTGCCACTACTTGTGGTTAC | 1380 |
| gb:MT106053 | Organism:Severe | ACTTGCGAATTTTGTGGCACTGAGAATTTGACTAAAGAAGGTGCCACTACTTGTGGTTAC | 1342 |
| gb:MT019533 | Organism:Severe | ACTTGCGAATTTTGTGGCACTGAGAATTTGACTAAAGAAGGTGCCACTACTTGTGGTTAC | 1342 |
| gb:MT019531 | Organism:Severe | ACTTGCGAATTTTGTGGCACTGAGAATTTGACTAAAGAAGGTGCCACTACTTGTGGTTAC | 1342 |
| gb:MN996528 | Organism:Severe | ACTTGCGAATTTTGTGGCACTGAGAATTTGACTAAAGAAGGTGCCACTACTTGTGGTTAC | 1342 |
| gb:MN996530 | Organism:Severe | ACTTGCGAATTTTGTGGCACTGAGAATTTGACTAAAGAAGGTGCCACTACTTGTGGTTAC | 1328 |
| gb:MN908947 | Organism:Severe | ACTTGCGAATTTTGTGGCACTGAGAATTTGACTAAAGAAGGTGCCACTACTTGTGGTTAC | 1342 |
| gb:MT019532 | Organism:Severe | ACTTGCGAATTTTGTGGCACTGAGAATTTGACTAAAGAAGGTGCCACTACTTGTGGTTAC | 1342 |

\*\*\*\*\*

|             |                 |                                                             |      |
|-------------|-----------------|-------------------------------------------------------------|------|
| gb:MT020781 | Organism:Severe | TTACCCCAAATGCTGTTGTTAAAATTTATTGTCCAGCATGTCACAATTCAGAAGTAGGA | 1390 |
| gb:MT007544 | Organism:Severe | TTACCCCAAATGCTGTTGTTAAAATTTATTGTCCAGCATGTCACAATTCAGAAGTAGGA | 1402 |
| gb:MN994467 | Organism:Severe | TTACCCCAAATGCTGTTGTTAAAATTTATTGTCCAGCATGTCACAATTCAGAAGTAGGA | 1402 |
| gb:MT044257 | Organism:Severe | TTACCCCAAATGCTGTTGTTAAAATTTATTGTCCAGCATGTCACAATTCAGAAGTAGGA | 1402 |
| gb:MT106054 | Organism:Severe | TTACCCCAAATGCTGTTGTTAAAATTTATTGTCCAGCATGTCACAATTCAGAAGTAGGA | 1402 |
| gb:MT049951 | Organism:Severe | TTACCCCAAATGCTGTTGTTAAAATTTATTGTCCAGCATGTCACAATTCAGAAGTAGGA | 1402 |
| gb:MN975262 | Organism:Severe | TTACCCCAAATGCTGTTGTTAAAATTTATTGTCCAGCATGTCACAATTCAGAAGTAGGA | 1402 |
| gb:MT106052 | Organism:Severe | TTACCCCAAATGCTGTTGTTAAAATTTATTGTCCAGCATGTCACAATTCAGAAGTAGGA | 1402 |
| gb:LC522975 | Organism:Severe | TTACCCCAAATGCTGTTGTTAAAATTTATTGTCCAGCATGTCACAATTCAGAAGTAGGA | 1399 |
| gb:LC522973 | Organism:Severe | TTACCCCAAATGCTGTTGTTAAAATTTATTGTCCAGCATGTCACAATTCAGAAGTAGGA | 1399 |
| gb:LC522974 | Organism:Severe | TTACCCCAAATGCTGTTGTTAAAATTTATTGTCCAGCATGTCACAATTCAGAAGTAGGA | 1399 |
| gb:MN985325 | Organism:Severe | TTACCCCAAATGCTGTTGTTAAAATTTATTGTCCAGCATGTCACAATTCAGAAGTAGGA | 1402 |
| gb:MT020881 | Organism:Severe | TTACCCCAAATGCTGTTGTTAAAATTTATTGTCCAGCATGTCACAATTCAGAAGTAGGA | 1402 |
| gb:MT020880 | Organism:Severe | TTACCCCAAATGCTGTTGTTAAAATTTATTGTCCAGCATGTCACAATTCAGAAGTAGGA | 1402 |
| gb:MT066175 | Organism:Severe | TTACCCCAAATGCTGTTGTTAAAATTTATTGTCCAGCATGTCACAATTCAGAAGTAGGA | 1402 |
| gb:MN997409 | Organism:Severe | TTACCCCAAATGCTGTTGTTAAAATTTATTGTCCAGCATGTCACAATTCAGAAGTAGGA | 1402 |
| gb:MN938384 | Organism:Severe | TTACCCCAAATGCTGTTGTTAAAATTTATTGTCCAGCATGTCACAATTCAGAAGTAGGA | 1370 |
| gb:MT044258 | Organism:Severe | TTACCCCAAATGCTGTTGTTAAAATTTATTGTCCAGCATGTCACAATTCAGAAGTAGGA | 1378 |
| gb:MT039890 | Organism:Severe | TTACCCCAAATGCTGTTGTTAAAATTTATTGTCCAGCATGTCACAATTCAGAAGTAGGA | 1402 |
| gb:MN988713 | Organism:Severe | TTACCCCAAATGCTGTTGTTAAAATTTATTGTCCAGCATGTCACAATTCAGAAGTAGGA | 1402 |
| gb:LC521925 | Organism:Severe | TTACCCCAAATGCTGTTGTTAAAATTTATTGTCCAGCATGTCACAATTCAGAAGTAGGA | 1375 |
| gb:MT093571 | Organism:Severe | TTACCCCAAATGCTGTTGTTAAAATTTATTGTCCAGCATGTCACAATTCAGAAGTAGGA | 1402 |
| gb:MT039887 | Organism:Severe | TTACCCCAAATGCTGTTGTTAAAATTTATTGTCCAGCATGTCACAATTCAGAAGTAGGA | 1402 |
| gb:MT019530 | Organism:Severe | TTACCCCAAATGCTGTTGTTAAAATTTATTGTCCAGCATGTCACAATTCAGAAGTAGGA | 1402 |
| gb:MT039888 | Organism:Severe | TTACCCCAAATGCTGTTGTTAAAATTTATTGTCCAGCATGTCACAATTCAGAAGTAGGA | 1402 |
| gb:LC522972 | Organism:Severe | TTACCCCAAATGCTGTTGTTAAAATTTATTGTCCAGCATGTCACAATTCAGAAGTAGGA | 1399 |
| gb:MT027063 | Organism:Severe | TTACCCCAAATGCTGTTGTTAAAATTTATTGTCCAGCATGTCACAATTCAGAAGTAGGA | 1402 |
| gb:MT027062 | Organism:Severe | TTACCCCAAATGCTGTTGTTAAAATTTATTGTCCAGCATGTCACAATTCAGAAGTAGGA | 1402 |
| gb:MT019529 | Organism:Severe | TTACCCCAAATGCTGTTGTTAAAATTTATTGTCCAGCATGTCACAATTCAGAAGTAGGA | 1402 |
| gb:MN996529 | Organism:Severe | TTACCCCAAATGCTGTTGTTAAAATTTATTGTCCAGCATGTCACAATTCAGAAGTAGGA | 1390 |
| gb:MN996531 | Organism:Severe | TTACCCCAAATGCTGTTGTTAAAATTTATTGTCCAGCATGTCACAATTCAGAAGTAGGA | 1389 |
| gb:MT066176 | Organism:Severe | TTACCCCAAATGCTGTTGTTAAAATTTATTGTCCAGCATGTCACAATTCAGAAGTAGGA | 1402 |
| gb:MT027064 | Organism:Severe | TTACCCCAAATGCTGTTGTTAAAATTTATTGTCCAGCATGTCACAATTCAGAAGTAGGA | 1402 |
| gb:MN994468 | Organism:Severe | TTACCCCAAATGCTGTTGTTAAAATTTATTGTCCAGCATGTCACAATTCAGAAGTAGGA | 1402 |
| gb:MT072688 | Organism:Severe | TTACCCCAAATGCTGTTGTTAAAATTTATTGTCCAGCATGTCACAATTCAGAAGTAGGA | 1387 |
| gb:MN996527 | Organism:Severe | TTACCCCAAATGCTGTTGTTAAAATTTATTGTCCAGCATGTCACAATTCAGAAGTAGGA | 1369 |
| gb:MT093631 | Organism:Severe | TTACCCCAAATGCTGTTGTTAAAATTTATTGTCCAGCATGTCACAATTCAGAAGTAGGA | 1440 |
| gb:MT106053 | Organism:Severe | TTACCCCAAATGCTGTTGTTAAAATTTATTGTCCAGCATGTCACAATTCAGAAGTAGGA | 1402 |
| gb:MT019533 | Organism:Severe | TTACCCCAAATGCTGTTGTTAAAATTTATTGTCCAGCATGTCACAATTCAGAAGTAGGA | 1402 |
| gb:MT019531 | Organism:Severe | TTACCCCAAATGCTGTTGTTAAAATTTATTGTCCAGCATGTCACAATTCAGAAGTAGGA | 1402 |
| gb:MN996528 | Organism:Severe | TTACCCCAAATGCTGTTGTTAAAATTTATTGTCCAGCATGTCACAATTCAGAAGTAGGA | 1402 |
| gb:MN996530 | Organism:Severe | TTACCCCAAATGCTGTTGTTAAAATTTATTGTCCAGCATGTCACAATTCAGAAGTAGGA | 1388 |
| gb:MN908947 | Organism:Severe | TTACCCCAAATGCTGTTGTTAAAATTTATTGTCCAGCATGTCACAATTCAGAAGTAGGA | 1402 |

|             |                  |                                                                       |      |
|-------------|------------------|-----------------------------------------------------------------------|------|
| gb:MT019532 | Organism: Severe | TTACCCCAAATGCTGTGTTAAAATTTATTGTCCAGCATGTCACAATTCAGAAGTAGGA<br>*****   | 1402 |
| gb:MT020781 | Organism: Severe | CCTGAGCATAGTCTTGCCGAATACCATAATGAATCTGGCTTGAAAACCATTCCTCGTAAG          | 1450 |
| gb:MT007544 | Organism: Severe | CCTGAGCATAGTCTTGCCGAATACCATAATGAATCTGGCTTGAAAACCATTCCTCGTAAG          | 1462 |
| gb:MN994467 | Organism: Severe | CCTGAGCATAGTCTTGCCGAATACCATAATGAATCTGGCTTGAAAACCATTCCTCGTAAG          | 1462 |
| gb:MT044257 | Organism: Severe | CCTGAGCATAGTCTTGCCGAATACCATAATGAATCTGGCTTGAAAACCATTCCTCGTAAG          | 1462 |
| gb:MT106054 | Organism: Severe | CCTGAGCATAGTCTTGCCGAATACCATAATGAATCTGGCTTGAAAACCATTCCTCGTAAG          | 1462 |
| gb:MT049951 | Organism: Severe | CCTGAGCATAGTCTTGCCGAATACCATAATGAATCTGGCTTGAAAACCATTCCTCGTAAG          | 1462 |
| gb:MN975262 | Organism: Severe | CCTGAGCATAGTCTTGCCGAATACCATAATGAATCTGGCTTGAAAACCATTCCTCGTAAG          | 1462 |
| gb:MT106052 | Organism: Severe | CCTGAGCATAGTCTTGCCGAATACCATAATGAATCTGGCTTGAAAACCATTCCTCGTAAG          | 1462 |
| gb:LC522975 | Organism: Severe | CCTGAGCATAGTCTTGCCGAATACCATAATGAATCTGGCTTGAAAACCATTCCTCGTAAG          | 1459 |
| gb:LC522973 | Organism: Severe | CCTGAGCATAGTCTTGCCGAATACCATAATGAATCTGGCTTGAAAACCATTCCTCGTAAG          | 1459 |
| gb:LC522974 | Organism: Severe | CCTGAGCATAGTCTTGCCGAATACCATAATGAATCTGGCTTGAAAACCATTCCTCGTAAG          | 1459 |
| gb:MN985325 | Organism: Severe | CCTGAGCATAGTCTTGCCGAATACCATAATGAATCTGGCTTGAAAACCATTCCTCGTAAG          | 1462 |
| gb:MT020881 | Organism: Severe | CCTGAGCATAGTCTTGCCGAATACCATAATGAATCTGGCTTGAAAACCATTCCTCGTAAG          | 1462 |
| gb:MT020880 | Organism: Severe | CCTGAGCATAGTCTTGCCGAATACCATAATGAATCTGGCTTGAAAACCATTCCTCGTAAG          | 1462 |
| gb:MT066175 | Organism: Severe | CCTGAGCATAGTCTTGCCGAATACCATAATGAATCTGGCTTGAAAACCATTCCTCGTAAG          | 1462 |
| gb:MN997409 | Organism: Severe | CCTGAGCATAGTCTTGCCGAATACCATAATGAATCTGGCTTGAAAACCATTCCTCGTAAG          | 1462 |
| gb:MN938384 | Organism: Severe | CCTGAGCATAGTCTTGCCGAATACCATAATGAATCTGGCTTGAAAACCATTCCTCGTAAG          | 1430 |
| gb:MT044258 | Organism: Severe | CCTGAGCATAGTCTTGCCGAATACCATAATGAATCTGGCTTGAAAACCATTCCTCGTAAG          | 1438 |
| gb:MT039890 | Organism: Severe | CCTGAGCATAGTCTTGCCGAATACCATAATGAATCTGGCTTGAAAACCATTCCTCGTAAG          | 1462 |
| gb:MN988713 | Organism: Severe | CCTGAGCATAGTCTTGCCGAATACCATAATGAATCTGGCTTGAAAACCATTCCTCGTAAG          | 1462 |
| gb:LC521925 | Organism: Severe | CCTGAGCATAGTCTTGCCGAATACCATAATGAATCTGGCTTGAAAACCATTCCTCGTAAG          | 1435 |
| gb:MT093571 | Organism: Severe | CCTGAGCATAGTCTTGCCGAATACCATAATGAATCTGGCTTGAAAACCATTCCTCGTAAG          | 1462 |
| gb:MT039887 | Organism: Severe | CCTGAGCATAGTCTTGCCGAATACCATAATGAATCTGGCTTGAAAACCATTCCTCGTAAG          | 1462 |
| gb:MT019530 | Organism: Severe | CCTGAGCATAGTCTTGCCGAATACCATAATGAATCTGGCTTGAAAACCATTCCTCGTAAG          | 1462 |
| gb:MT039888 | Organism: Severe | CCTGAGCATAGTCTTGCCGAATACCATAATGAATCTGGCTTGAAAACCATTCCTCGTAAG          | 1462 |
| gb:LC522972 | Organism: Severe | CCTGAGCATAGTCTTGCCGAATACCATAATGAATCTGGCTTGAAAACCATTCCTCGTAAG          | 1459 |
| gb:MT027063 | Organism: Severe | CCTGAGCATAGTCTTGCCGAATACCATAATGAATCTGGCTTGAAAACCATTCCTCGTAAG          | 1462 |
| gb:MT027062 | Organism: Severe | CCTGAGCATAGTCTTGCCGAATACCATAATGAATCTGGCTTGAAAACCATTCCTCGTAAG          | 1462 |
| gb:MT019529 | Organism: Severe | CCTGAGCATAGTCTTGCCGAATACCATAATGAATCTGGCTTGAAAACCATTCCTCGTAAG          | 1462 |
| gb:MN996529 | Organism: Severe | CCTGAGCATAGTCTTGCCGAATACCATAATGAATCTGGCTTGAAAACCATTCCTCGTAAG          | 1450 |
| gb:MN996531 | Organism: Severe | CCTGAGCATAGTCTTGCCGAATACCATAATGAATCTGGCTTGAAAACCATTCCTCGTAAG          | 1449 |
| gb:MT066176 | Organism: Severe | CCTGAGCATAGTCTTGCCGAATACCATAATGAATCTGGCTTGAAAACCATTCCTCGTAAG          | 1462 |
| gb:MT027064 | Organism: Severe | CCTGAGCATAGTCTTGCCGAATACCATAATGAATCTGGCTTGAAAACCATTCCTCGTAAG          | 1462 |
| gb:MN994468 | Organism: Severe | CCTGAGCATAGTCTTGCCGAATACCATAATGAATCTGGCTTGAAAACCATTCCTCGTAAG          | 1462 |
| gb:MT072688 | Organism: Severe | CCTGAGCATAGTCTTGCCGAATACCATAATGAATCTGGCTTGAAAACCATTCCTCGTAAG          | 1447 |
| gb:MN996527 | Organism: Severe | CCTGAGCATAGTCTTGCCGAATACCATAATGAATCTGGCTTGAAAACCATTCCTCGTAAG          | 1429 |
| gb:MT093631 | Organism: Severe | CCTGAGCATAGTCTTGCCGAATACCATAATGAATCTGGCTTGAAAACCATTCCTCGTAAG          | 1500 |
| gb:MT106053 | Organism: Severe | CCTGAGCATAGTCTTGCCGAATACCATAATGAATCTGGCTTGAAAACCATTCCTCGTAAG          | 1462 |
| gb:MT019533 | Organism: Severe | CCTGAGCATAGTCTTGCCGAATACCATAATGAATCTGGCTTGAAAACCATTCCTCGTAAG          | 1462 |
| gb:MT019531 | Organism: Severe | CCTGAGCATAGTCTTGCCGAATACCATAATGAATCTGGCTTGAAAACCATTCCTCGTAAG          | 1462 |
| gb:MN996528 | Organism: Severe | CCTGAGCATAGTCTTGCCGAATACCATAATGAATCTGGCTTGAAAACCATTCCTCGTAAG          | 1462 |
| gb:MN996530 | Organism: Severe | CCTGAGCATAGTCTTGCCGAATACCATAATGAATCTGGCTTGAAAACCATTCCTCGTAAG          | 1448 |
| gb:MN908947 | Organism: Severe | CCTGAGCATAGTCTTGCCGAATACCATAATGAATCTGGCTTGAAAACCATTCCTCGTAAG          | 1462 |
| gb:MT019532 | Organism: Severe | CCTGAGCATAGTCTTGCCGAATACCATAATGAATCTGGCTTGAAAACCATTCCTCGTAAG<br>***** | 1462 |

|             |                  |                                                             |      |
|-------------|------------------|-------------------------------------------------------------|------|
| gb:MT020781 | Organism: Severe | GGTGGTGCACACTATTGCCTTTGGAGGCTGTGTGTTCTTATGTTGGTTGCCATAACAAG | 1510 |
| gb:MT007544 | Organism: Severe | GGTGGTGCACACTATTGCCTTTGGAGGCTGTGTGTTCTTATGTTGGTTGCCATAACAAG | 1522 |
| gb:MN994467 | Organism: Severe | GGTGGTGCACACTATTGCCTTTGGAGGCTGTGTGTTCTTATGTTGGTTGCCATAACAAG | 1522 |
| gb:MT044257 | Organism: Severe | GGTGGTGCACACTATTGCCTTTGGAGGCTGTGTGTTCTTATGTTGGTTGCCATAACAAG | 1522 |
| gb:MT106054 | Organism: Severe | GGTGGTGCACACTATTGCCTTTGGAGGCTGTGTGTTCTTATGTTGGTTGCCATAACAAG | 1522 |
| gb:MT049951 | Organism: Severe | GGTGGTGCACACTATTGCCTTTGGAGGCTGTGTGTTCTTATGTTGGTTGCCATAACAAG | 1522 |
| gb:MN975262 | Organism: Severe | GGTGGTGCACACTATTGCCTTTGGAGGCTGTGTGTTCTTATGTTGGTTGCCATAACAAG | 1522 |
| gb:MT106052 | Organism: Severe | GGTGGTGCACACTATTGCCTTTGGAGGCTGTGTGTTCTTATGTTGGTTGCCATAACAAG | 1522 |
| gb:LC522975 | Organism: Severe | GGTGGTGCACACTATTGCCTTTGGAGGCTGTGTGTTCTTATGTTGGTTGCCATAACAAG | 1519 |
| gb:LC522973 | Organism: Severe | GGTGGTGCACACTATTGCCTTTGGAGGCTGTGTGTTCTTATGTTGGTTGCCATAACAAG | 1519 |
| gb:LC522974 | Organism: Severe | GGTGGTGCACACTATTGCCTTTGGAGGCTGTGTGTTCTTATGTTGGTTGCCATAACAAG | 1519 |
| gb:MN985325 | Organism: Severe | GGTGGTGCACACTATTGCCTTTGGAGGCTGTGTGTTCTTATGTTGGTTGCCATAACAAG | 1522 |
| gb:MT020881 | Organism: Severe | GGTGGTGCACACTATTGCCTTTGGAGGCTGTGTGTTCTTATGTTGGTTGCCATAACAAG | 1522 |
| gb:MT020880 | Organism: Severe | GGTGGTGCACACTATTGCCTTTGGAGGCTGTGTGTTCTTATGTTGGTTGCCATAACAAG | 1522 |
| gb:MT066175 | Organism: Severe | GGTGGTGCACACTATTGCCTTTGGAGGCTGTGTGTTCTTATGTTGGTTGCCATAACAAG | 1522 |
| gb:MN997409 | Organism: Severe | GGTGGTGCACACTATTGCCTTTGGAGGCTGTGTGTTCTTATGTTGGTTGCCATAACAAG | 1522 |

|             |                 |                                                              |      |
|-------------|-----------------|--------------------------------------------------------------|------|
| gb:MN938384 | Organism:Severe | GGTGGTCGCACTATTGCCTTTGGAGGCTGTGTGTTCTCTTATGTTGGTTGCCATAACAAG | 1490 |
| gb:MT044258 | Organism:Severe | GGTGGTCGCACTATTGCCTTTGGAGGCTGTGTGTTCTCTTATGTTGGTTGCCATAACAAG | 1498 |
| gb:MT039890 | Organism:Severe | GGTGGTCGCACTATTGCCTTTGGAGGCTGTGTGTTCTCTTATGTTGGTTGCCATAACAAG | 1522 |
| gb:MN988713 | Organism:Severe | GGTGGTCGCACTATTGCCTTTGGAGGCTGTGTGTTCTCTTATGTTGGTTGCCATAACAAG | 1522 |
| gb:LC521925 | Organism:Severe | GGTGGTCGCACTATTGCCTTTGGAGGCTGTGTGTTCTCTTATGTTGGTTGCCATAACAAG | 1495 |
| gb:MT093571 | Organism:Severe | GGTGGTCGCACTATTGCCTTTGGAGGCTGTGTGTTCTCTTATGTTGGTTGCCATAACAAG | 1522 |
| gb:MT039887 | Organism:Severe | GGTGGTCGCACTATTGCCTTTGGAGGCTGTGTGTTCTCTTATGTTGGTTGCCATAACAAG | 1522 |
| gb:MT019530 | Organism:Severe | GGTGGTCGCACTATTGCCTTTGGAGGCTGTGTGTTCTCTTATGTTGGTTGCCATAACAAG | 1522 |
| gb:MT039888 | Organism:Severe | GGTGGTCGCACTATTGCCTTTGGAGGCTGTGTGTTCTCTTATGTTGGTTGCCATAACAAG | 1522 |
| gb:LC522972 | Organism:Severe | GGTGGTCGCACTATTGCCTTTGGAGGCTGTGTGTTCTCTTATGTTGGTTGCCATAACAAG | 1519 |
| gb:MT027063 | Organism:Severe | GGTGGTCGCACTATTGCCTTTGGAGGCTGTGTGTTCTCTTATGTTGGTTGCCATAACAAG | 1522 |
| gb:MT027062 | Organism:Severe | GGTGGTCGCACTATTGCCTTTGGAGGCTGTGTGTTCTCTTATGTTGGTTGCCATAACAAG | 1522 |
| gb:MT019529 | Organism:Severe | GGTGGTCGCACTATTGCCTTTGGAGGCTGTGTGTTCTCTTATGTTGGTTGCCATAACAAG | 1522 |
| gb:MN996529 | Organism:Severe | GGTGGTCGCACTATTGCCTTTGGAGGCTGTGTGTTCTCTTATGTTGGTTGCCATAACAAG | 1510 |
| gb:MN996531 | Organism:Severe | GGTGGTCGCACTATTGCCTTTGGAGGCTGTGTGTTCTCTTATGTTGGTTGCCATAACAAG | 1509 |
| gb:MT066176 | Organism:Severe | GGTGGTCGCACTATTGCCTTTGGAGGCTGTGTGTTCTCTTATGTTGGTTGCCATAACAAG | 1522 |
| gb:MT027064 | Organism:Severe | GGTGGTCGCACTATTGCCTTTGGAGGCTGTGTGTTCTCTTATGTTGGTTGCCATAACAAG | 1522 |
| gb:MN994468 | Organism:Severe | GGTGGTCGCACTATTGCCTTTGGAGGCTGTGTGTTCTCTTATGTTGGTTGCCATAACAAG | 1522 |
| gb:MT072688 | Organism:Severe | GGTGGTCGCACTATTGCCTTTGGAGGCTGTGTGTTCTCTTATGTTGGTTGCCATAACAAG | 1507 |
| gb:MN996527 | Organism:Severe | GGTGGTCGCACTATTGCCTTTGGAGGCTGTGTGTTCTCTTATGTTGGTTGCCATAACAAG | 1489 |
| gb:MT093631 | Organism:Severe | GGTGGTCGCACTATTGCCTTTGGAGGCTGTGTGTTCTCTTATGTTGGTTGCCATAACAAG | 1560 |
| gb:MT106053 | Organism:Severe | GGTGGTCGCACTATTGCCTTTGGAGGCTGTGTGTTCTCTTATGTTGGTTGCCATAACAAG | 1522 |
| gb:MT019533 | Organism:Severe | GGTGGTCGCACTATTGCCTTTGGAGGCTGTGTGTTCTCTTATGTTGGTTGCCATAACAAG | 1522 |
| gb:MT019531 | Organism:Severe | GGTGGTCGCACTATTGCCTTTGGAGGCTGTGTGTTCTCTTATGTTGGTTGCCATAACAAG | 1522 |
| gb:MN996528 | Organism:Severe | GGTGGTCGCACTATTGCCTTTGGAGGCTGTGTGTTCTCTTATGTTGGTTGCCATAACAAG | 1522 |
| gb:MN996530 | Organism:Severe | GGTGGTCGCACTATTGCCTTTGGAGGCTGTGTGTTCTCTTATGTTGGTTGCCATAACAAG | 1508 |
| gb:MN908947 | Organism:Severe | GGTGGTCGCACTATTGCCTTTGGAGGCTGTGTGTTCTCTTATGTTGGTTGCCATAACAAG | 1522 |
| gb:MT019532 | Organism:Severe | GGTGGTCGCACTATTGCCTTTGGAGGCTGTGTGTTCTCTTATGTTGGTTGCCATAACAAG | 1522 |

\*\*\*\*\*

|             |                 |                                                               |      |
|-------------|-----------------|---------------------------------------------------------------|------|
| gb:MT020781 | Organism:Severe | TGTGCCTATTGGGTTCCACGTGCTAGCGCTAACATAGGTTGTAACCATAACAGGTGTTGTT | 1570 |
| gb:MT007544 | Organism:Severe | TGTGCCTATTGGGTTCCACGTGCTAGCGCTAACATAGGTTGTAACCATAACAGGTGTTGTT | 1582 |
| gb:MN994467 | Organism:Severe | TGTGCCTATTGGGTTCCACGTGCTAACGCTAACATAGGTTGTAACCATAACAGGTGTTGTT | 1582 |
| gb:MT044257 | Organism:Severe | TGTGCCTATTGGGTTCCACGTGCTAGCGCTAACATAGGTTGTAACCATAACAGGTGTTGTT | 1582 |
| gb:MT106054 | Organism:Severe | TGTGCCTATTGGGTTCCACGTGCTAGCGCTAACATAGGTTGTAACCATAACAGGTGTTGTT | 1582 |
| gb:MT049951 | Organism:Severe | TGTGCCTATTGGGTTCCACGTGCTAGCGCTAACATAGGTTGTAACCATAACAGGTGTTGTT | 1582 |
| gb:MN975262 | Organism:Severe | TGTGCCTATTGGGTTCCACGTGCTAGCGCTAACATAGGTTGTAACCATAACAGGTGTTGTT | 1582 |
| gb:MT106052 | Organism:Severe | TGTGCCTATTGGGTTCCACGTGCTAGCGCTAACATAGGTTGTAACCATAACAGGTGTTGTT | 1582 |
| gb:LC522975 | Organism:Severe | TGTGCCTATTGGGTTCCACGTGCTAGCGCTAACATAGGTTGTAACCATAACAGGTGTTGTT | 1579 |
| gb:LC522973 | Organism:Severe | TGTGCCTATTGGGTTCCACGTGCTAGCGCTAACATAGGTTGTAACCATAACAGGTGTTGTT | 1579 |
| gb:LC522974 | Organism:Severe | TGTGCCTATTGGGTTCCACGTGCTAGCGCTAACATAGGTTGTAACCATAACAGGTGTTGTT | 1579 |
| gb:MN985325 | Organism:Severe | TGTGCCTATTGGGTTCCACGTGCTAGCGCTAACATAGGTTGTAACCATAACAGGTGTTGTT | 1582 |
| gb:MT020881 | Organism:Severe | TGTGCCTATTGGGTTCCACGTGCTAGCGCTAACATAGGTTGTAACCATAACAGGTGTTGTT | 1582 |
| gb:MT020880 | Organism:Severe | TGTGCCTATTGGGTTCCACGTGCTAGCGCTAACATAGGTTGTAACCATAACAGGTGTTGTT | 1582 |
| gb:MT066175 | Organism:Severe | TGTGCCTATTGGGTTCCACGTGCTAGCGCTAACATAGGTTGTAACCATAACAGGTGTTGTT | 1582 |
| gb:MN997409 | Organism:Severe | TGTGCCTATTGGGTTCCACGTGCTAGCGCTAACATAGGTTGTAACCATAACAGGTGTTGTT | 1582 |
| gb:MN938384 | Organism:Severe | TGTGCCTATTGGGTTCCACGTGCTAGCGCTAACATAGGTTGTAACCATAACAGGTGTTGTT | 1550 |
| gb:MT044258 | Organism:Severe | TGTGCCTATTGGGTTCCACGTGCTAGCGCTAACATAGGTTGTAACCATAACAGGTGTTGTT | 1558 |
| gb:MT039890 | Organism:Severe | TGTGCCTATTGGGTTCCACGTGCTAGCGCTAACATAGGTTGTAACCATAACAGGTGTTGTT | 1582 |
| gb:MN988713 | Organism:Severe | TGTGCCTATTGGGTTCCACGTGCTAGCGCTAACATAGGTTGTAACCATAACAGGTGTTGTT | 1582 |
| gb:LC521925 | Organism:Severe | TGTGCCTATTGGGTTCCACGTGCTAGCGCTAACATAGGTTGTAACCATAACAGGTGTTGTT | 1555 |
| gb:MT093571 | Organism:Severe | TGTGCCTATTGGGTTCCACGTGCTAGCGCTAACATAGGTTGTAACCATAACAGGTGTTGTT | 1582 |
| gb:MT039887 | Organism:Severe | TGTGCCTATTGGGTTCCACGTGCTAGCGCTAACATAGGTTGTAACCATAACAGGTGTTGTT | 1582 |
| gb:MT019530 | Organism:Severe | TGTGCCTATTGGGTTCCACGTGCTAGCGCTAACATAGGTTGTAACCATAACAGGTGTTGTT | 1582 |
| gb:MT039888 | Organism:Severe | TGTGCCTATTGGGTTCCACGTGCTAGCGCTAACATAGGTTGTAACCATAACAGGTGTTGTT | 1582 |
| gb:LC522972 | Organism:Severe | TGTGCCTATTGGGTTCCACGTGCTAGCGCTAACATAGGTTGTAACCATAACAGGTGTTGTT | 1579 |
| gb:MT027063 | Organism:Severe | TGTGCCTATTGGGTTCCACGTGCTAGCGCTAACATAGGTTGTAACCATAACAGGTGTTGTT | 1582 |
| gb:MT027062 | Organism:Severe | TGTGCCTATTGGGTTCCACGTGCTAGCGCTAACATAGGTTGTAACCATAACAGGTGTTGTT | 1582 |
| gb:MT019529 | Organism:Severe | TGTGCCTATTGGGTTCCACGTGCTAGCGCTAACATAGGTTGTAACCATAACAGGTGTTGTT | 1582 |
| gb:MN996529 | Organism:Severe | TGTGCCTATTGGGTTCCACGTGCTAGCGCTAACATAGGTTGTAACCATAACAGGTGTTGTT | 1570 |
| gb:MN996531 | Organism:Severe | TGTGCCTATTGGGTTCCACGTGCTAGCGCTAACATAGGTTGTAACCATAACAGGTGTTGTT | 1569 |
| gb:MT066176 | Organism:Severe | TGTGCCTATTGGGTTCCACGTGCTAGCGCTAACATAGGTTGTAACCATAACAGGTGTTGTT | 1582 |
| gb:MT027064 | Organism:Severe | TGTGCCTATTGGGTTCCACGTGCTAGCGCTAACATAGGTTGTAACCATAACAGGTGTTGTT | 1582 |
| gb:MN994468 | Organism:Severe | TGTGCCTATTGGGTTCCACGTGCTAGCGCTAACATAGGTTGTAACCATAACAGGTGTTGTT | 1582 |
| gb:MT072688 | Organism:Severe | TGTGCCTATTGGGTTCCACGTGCTAGCGCTAACATAGGTTGTAACCATAACAGGTGTTGTT | 1567 |

|             |                 |                                                              |      |
|-------------|-----------------|--------------------------------------------------------------|------|
| gb:MN996527 | Organism:Severe | TGTGCCTATTGGGTTCCACGTGCTAGCGCTAACATAGGTTGTAACCATACAGGTGTTGTT | 1549 |
| gb:MT093631 | Organism:Severe | TGTGCCTATTGGGTTCCACGTGCTAGCGCTAACATAGGTTGTAACCATACAGGTGTTGTT | 1620 |
| gb:MT106053 | Organism:Severe | TGTGCCTATTGGGTTCCACGTGCTAGCGCTAACATAGGTTGTAACCATACAGGTGTTGTT | 1582 |
| gb:MT019533 | Organism:Severe | TGTGCCTATTGGGTTCCACGTGCTAGCGCTAACATAGGTTGTAACCATACAGGTGTTGTT | 1582 |
| gb:MT019531 | Organism:Severe | TGTGCCTATTGGGTTCCACGTGCTAGCGCTAACATAGGTTGTAACCATACAGGTGTTGTT | 1582 |
| gb:MN996528 | Organism:Severe | TGTGCCTATTGGGTTCCACGTGCTAGCGCTAACATAGGTTGTAACCATACAGGTGTTGTT | 1582 |
| gb:MN996530 | Organism:Severe | TGTGCCTATTGGGTTCCACGTGCTAGCGCTAACATAGGTTGTAACCATACAGGTGTTGTT | 1568 |
| gb:MN908947 | Organism:Severe | TGTGCCTATTGGGTTCCACGTGCTAGCGCTAACATAGGTTGTAACCATACAGGTGTTGTT | 1582 |
| gb:MT019532 | Organism:Severe | TGTGCCTATTGGGTTCCACGTGCTAGCGCTAACATAGGTTGTAACCATACAGGTGTTGTT | 1582 |

\*\*\*\*\*

|             |                 |                                                              |      |
|-------------|-----------------|--------------------------------------------------------------|------|
| gb:MT020781 | Organism:Severe | GGAGAAGGTTCCGAAGGTCCTAATGACAACCTTCTTGAAATACTCCAAAAGAGAAAAGTC | 1630 |
| gb:MT007544 | Organism:Severe | GGAGAAGGTTCCGAAGGTCCTAATGACAACCTTCTTGAAATACTCCAAAAGAGAAAAGTC | 1642 |
| gb:MN994467 | Organism:Severe | GGAGAAGGTTCCGAAGGTCCTAATGACAACCTTCTTGAAATACTCCAAAAGAGAAAAGTC | 1642 |
| gb:MT044257 | Organism:Severe | GGAGAAGGTTCCGAAGGTCCTAATGACAACCTTCTTGAAATACTCCAAAAGAGAAAAGTC | 1642 |
| gb:MT106054 | Organism:Severe | GGAGAAGGTTCCGAAGGTCCTAATGACAACCTTCTTGAAATACTCCAAAAGAGAAAAGTC | 1642 |
| gb:MT049951 | Organism:Severe | GGAGAAGGTTCCGAAGGTCCTAATGACAACCTTCTTGAAATACTCCAAAAGAGAAAAGTC | 1642 |
| gb:MN975262 | Organism:Severe | GGAGAAGGTTCCGAAGGTCCTAATGACAACCTTCTTGAAATACTCCAAAAGAGAAAAGTC | 1642 |
| gb:MT106052 | Organism:Severe | GGAGAAGGTTCCGAAGGTCCTAATGACAACCTTCTTGAAATACTCCAAAAGAGAAAAGTC | 1642 |
| gb:LC522975 | Organism:Severe | GGAGAAGGTTCCGAAGGTCCTAATGACAACCTTCTTGAAATACTCCAAAAGAGAAAAGTC | 1639 |
| gb:LC522973 | Organism:Severe | GGAGAAGGTTCCGAAGGTCCTAATGACAACCTTCTTGAAATACTCCAAAAGAGAAAAGTC | 1639 |
| gb:LC522974 | Organism:Severe | GGAGAAGGTTCCGAAGGTCCTAATGACAACCTTCTTGAAATACTCCAAAAGAGAAAAGTC | 1639 |
| gb:MN985325 | Organism:Severe | GGAGAAGGTTCCGAAGGTCCTAATGACAACCTTCTTGAAATACTCCAAAAGAGAAAAGTC | 1642 |
| gb:MT020881 | Organism:Severe | GGAGAAGGTTCCGAAGGTCCTAATGACAACCTTCTTGAAATACTCCAAAAGAGAAAAGTC | 1642 |
| gb:MT020880 | Organism:Severe | GGAGAAGGTTCCGAAGGTCCTAATGACAACCTTCTTGAAATACTCCAAAAGAGAAAAGTC | 1642 |
| gb:MT066175 | Organism:Severe | GGAGAAGGTTCCGAAGGTCCTAATGACAACCTTCTTGAAATACTCCAAAAGAGAAAAGTC | 1642 |
| gb:MN997409 | Organism:Severe | GGAGAAGGTTCCGAAGGTCCTAATGACAACCTTCTTGAAATACTCCAAAAGAGAAAAGTC | 1642 |
| gb:MN938384 | Organism:Severe | GGAGAAGGTTCCGAAGGTCCTAATGACAACCTTCTTGAAATACTCCAAAAGAGAAAAGTC | 1610 |
| gb:MT044258 | Organism:Severe | GGAGAAGGTTCCGAAGGTCCTAATGACAACCTTCTTGAAATACTCCAAAAGAGAAAAGTC | 1618 |
| gb:MT039890 | Organism:Severe | GGAGAAGGTTCCGAAGGTCCTAATGACAACCTTCTTGAAATACTCCAAAAGAGAAAAGTC | 1642 |
| gb:MN988713 | Organism:Severe | GGAGAAGGTTCCGAAGGTCCTAATGACAACCTTCTTGAAATACTCCAAAAGAGAAAAGTC | 1642 |
| gb:LC521925 | Organism:Severe | GGAGAAGGTTCCGAAGGTCCTAATGACAACCTTCTTGAAATACTCCAAAAGAGAAAAGTC | 1615 |
| gb:MT093571 | Organism:Severe | GGAGAAGGTTCCGAAGGTCCTAATGACAACCTTCTTGAAATACTCCAAAAGAGAAAAGTC | 1642 |
| gb:MT039887 | Organism:Severe | GGAGAAGGTTCCGAAGGTCCTAATGACAACCTTCTTGAAATACTCCAAAAGAGAAAAGTC | 1642 |
| gb:MT019530 | Organism:Severe | GGAGAAGGTTCCGAAGGTCCTAATGACAACCTTCTTGAAATACTCCAAAAGAGAAAAGTC | 1642 |
| gb:MT039888 | Organism:Severe | GGAGAAGGTTCCGAAGGTCCTAATGACAACCTTCTTGAAATACTCCAAAAGAGAAAAGTC | 1642 |
| gb:LC522972 | Organism:Severe | GGAGAAGGTTCCGAAGGTCCTAATGACAACCTTCTTGAAATACTCCAAAAGAGAAAAGTC | 1639 |
| gb:MT027063 | Organism:Severe | GGAGAAGGTTCCGAAGGTCCTAATGACAACCTTCTTGAAATACTCCAAAAGAGAAAAGTC | 1642 |
| gb:MT027062 | Organism:Severe | GGAGAAGGTTCCGAAGGTCCTAATGACAACCTTCTTGAAATACTCCAAAAGAGAAAAGTC | 1642 |
| gb:MT019529 | Organism:Severe | GGAGAAGGTTCCGAAGGTCCTAATGACAACCTTCTTGAAATACTCCAAAAGAGAAAAGTC | 1642 |
| gb:MN996529 | Organism:Severe | GGAGAAGGTTCCGAAGGTCCTAATGACAACCTTCTTGAAATACTCCAAAAGAGAAAAGTC | 1630 |
| gb:MN996531 | Organism:Severe | GGAGAAGGTTCCGAAGGTCCTAATGACAACCTTCTTGAAATACTCCAAAAGAGAAAAGTC | 1629 |
| gb:MT066176 | Organism:Severe | GGAGAAGGTTCCGAAGGTCCTAATGACAACCTTCTTGAAATACTCCAAAAGAGAAAAGTC | 1642 |
| gb:MT027064 | Organism:Severe | GGAGAAGGTTCCGAAGGTCCTAATGACAACCTTCTTGAAATACTCCAAAAGAGAAAAGTC | 1642 |
| gb:MN994468 | Organism:Severe | GGAGAAGGTTCCGAAGGTCCTAATGACAACCTTCTTGAAATACTCCAAAAGAGAAAAGTC | 1642 |
| gb:MT072688 | Organism:Severe | GGAGAAGGTTCCGAAGGTCCTAATGACAACCTTCTTGAAATACTCCAAAAGAGAAAAGTC | 1627 |
| gb:MN996527 | Organism:Severe | GGAGAAGGTTCCGAAGGTCCTAATGACAACCTTCTTGAAATACTCCAAAAGAGAAAAGTC | 1609 |
| gb:MT093631 | Organism:Severe | GGAGAAGGTTCCGAAGGTCCTAATGACAACCTTCTTGAAATACTCCAAAAGAGAAAAGTC | 1680 |
| gb:MT106053 | Organism:Severe | GGAGAAGGTTCCGAAGGTCCTAATGACAACCTTCTTGAAATACTCCAAAAGAGAAAAGTC | 1642 |
| gb:MT019533 | Organism:Severe | GGAGAAGGTTCCGAAGGTCCTAATGACAACCTTCTTGAAATACTCCAAAAGAGAAAAGTC | 1642 |
| gb:MT019531 | Organism:Severe | GGAGAAGGTTCCGAAGGTCCTAATGACAACCTTCTTGAAATACTCCAAAAGAGAAAAGTC | 1642 |
| gb:MN996528 | Organism:Severe | GGAGAAGGTTCCGAAGGTCCTAATGACAACCTTCTTGAAATACTCCAAAAGAGAAAAGTC | 1642 |
| gb:MN996530 | Organism:Severe | GGAGAAGGTTCCGAAGGTCCTAATGACAACCTTCTTGAAATACTCCAAAAGAGAAAAGTC | 1628 |
| gb:MN908947 | Organism:Severe | GGAGAAGGTTCCGAAGGTCCTAATGACAACCTTCTTGAAATACTCCAAAAGAGAAAAGTC | 1642 |
| gb:MT019532 | Organism:Severe | GGAGAAGGTTCCGAAGGTCCTAATGACAACCTTCTTGAAATACTCCAAAAGAGAAAAGTC | 1642 |

\*\*\*\*\*

|             |                 |                                                            |      |
|-------------|-----------------|------------------------------------------------------------|------|
| gb:MT020781 | Organism:Severe | AACATCAATATTGTTGGTGACTTTAACTTAATGAAGAGATCGCCATTATTTGGCATCT | 1690 |
| gb:MT007544 | Organism:Severe | AACATCAATATTGTTGGTGACTTTAACTTAATGAAGAGATCGCCATTATTTGGCATCT | 1702 |
| gb:MN994467 | Organism:Severe | AACATCAATATTGTTGGTGACTTTAACTTAATGAAGAGATCGCCATTATTTGGCATCT | 1702 |
| gb:MT044257 | Organism:Severe | AACATCAATATTGTTGGTGACTTTAACTTAATGAAGAGATCGCCATTATTTGGCATCT | 1702 |
| gb:MT106054 | Organism:Severe | AACATCAATATTGTTGGTGACTTTAACTTAATGAAGAGATCGCCATTATTTGGCATCT | 1702 |
| gb:MT049951 | Organism:Severe | AACATCAATATTGTTGGTGACTTTAACTTAATGAAGAGATCGCCATTATTTGGCATCT | 1702 |
| gb:MN975262 | Organism:Severe | AACATCAATATTGTTGGTGACTTTAACTTAATGAAGAGATCGCCATTATTTGGCATCT | 1702 |
| gb:MT106052 | Organism:Severe | AACATCAATATTGTTGGTGACTTTAACTTAATGAAGAGATCGCCATTATTTGGCATCT | 1702 |



|             |                 |                                                              |      |
|-------------|-----------------|--------------------------------------------------------------|------|
| gb:MT027062 | Organism:Severe | TTTTCTGCTTCCACAAGTGCTTTTGTGGAAACTGTGAAAGGTTTGGATTATAAAGCATTC | 1762 |
| gb:MT019529 | Organism:Severe | TTTTCTGCTTCCACAAGTGCTTTTGTGGAAACTGTGAAAGGTTTGGATTATAAAGCATTC | 1762 |
| gb:MN996529 | Organism:Severe | TTTTCTGCTTCCACAAGTGCTTTTGTGGAAACTGTGAAAGGTTTGGATTATAAAGCATTC | 1750 |
| gb:MN996531 | Organism:Severe | TTTTCTGCTTCCACAAGTGCTTTTGTGGAAACTGTGAAAGGTTTGGATTATAAAGCATTC | 1749 |
| gb:MT066176 | Organism:Severe | TTTTCTGCTTCCACAAGTGCTTTTGTGGAAACTGTGAAAGGTTTGGATTATAAAGCATTC | 1762 |
| gb:MT027064 | Organism:Severe | TTTTCTGCTTCCACAAGTGCTTTTGTGGAAACTGTGAAAGGTTTGGATTATAAAGCATTC | 1762 |
| gb:MN994468 | Organism:Severe | TTTTCTGCTTCCACAAGTGCTTTTGTGGAAACTGTGAAAGGTTTGGATTATAAAGCATTC | 1762 |
| gb:MT072688 | Organism:Severe | TTTTCTGCTTCCACAAGTGCTTTTGTGGAAACTGTGAAAGGTTTGGATTATAAAGCATTC | 1747 |
| gb:MN996527 | Organism:Severe | TTTTCTGCTTCCACAAGTGCTTTTGTGGAAACTGTGAAAGGTTTGGATTATAAAGCATTC | 1729 |
| gb:MT093631 | Organism:Severe | TTTTCTGCTTCCACAAGTGCTTTTGTGGAAACTGTGAAAGGTTTGGATTATAAAGCATTC | 1800 |
| gb:MT106053 | Organism:Severe | TTTTCTGCTTCCACAAGTGCTTTTGTGGAAACTGTGAAAGGTTTGGATTATAAAGCATTC | 1762 |
| gb:MT019533 | Organism:Severe | TTTTCTGCTTCCACAAGTGCTTTTGTGGAAACTGTGAAAGGTTTGGATTATAAAGCATTC | 1762 |
| gb:MT019531 | Organism:Severe | TTTTCTGCTTCCACAAGTGCTTTTGTGGAAACTGTGAAAGGTTTGGATTATAAAGCATTC | 1762 |
| gb:MN996528 | Organism:Severe | TTTTCTGCTTCCACAAGTGCTTTTGTGGAAACTGTGAAAGGTTTGGATTATAAAGCATTC | 1762 |
| gb:MN996530 | Organism:Severe | TTTTCTGCTTCCACAAGTGCTTTTGTGGAAACTGTGAAAGGTTTGGATTATAAAGCATTC | 1748 |
| gb:MN908947 | Organism:Severe | TTTTCTGCTTCCACAAGTGCTTTTGTGGAAACTGTGAAAGGTTTGGATTATAAAGCATTC | 1762 |
| gb:MT019532 | Organism:Severe | TTTTCTGCTTCCACAAGTGCTTTTGTGGAAACTGTGAAAGGTTTGGATTATAAAGCATTC | 1762 |

\*\*\*\*\*

|             |                 |                                                             |      |
|-------------|-----------------|-------------------------------------------------------------|------|
| gb:MT020781 | Organism:Severe | AAACAAATGTTGAATCCTGTGGTAATTTTAAAGTTACAAAAGGAAAAGCTAAAAAAGGT | 1810 |
| gb:MT007544 | Organism:Severe | AAACAAATGTTGAATCCTGTGGTAATTTTAAAGTTACAAAAGGAAAAGCTAAAAAAGGT | 1822 |
| gb:MN994467 | Organism:Severe | AAACAAATGTTGAATCCTGTGGTAATTTTAAAGTTACAAAAGGAAAAGCTAAAAAAGGT | 1822 |
| gb:MT044257 | Organism:Severe | AAACAAATGTTGAATCCTGTGGTAATTTTAAAGTTACAAAAGGAAAAGCTAAAAAAGGT | 1822 |
| gb:MT106054 | Organism:Severe | AAACAAATGTTGAATCCTGTGGTAATTTTAAAGTTACAAAAGGAAAAGCTAAAAAAGGT | 1822 |
| gb:MT049951 | Organism:Severe | AAACAAATGTTGAATCCTGTGGTAATTTTAAAGTTACAAAAGGAAAAGCTAAAAAAGGT | 1822 |
| gb:MN975262 | Organism:Severe | AAACAAATGTTGAATCCTGTGGTAATTTTAAAGTTACAAAAGGAAAAGCTAAAAAAGGT | 1822 |
| gb:MT106052 | Organism:Severe | AAACAAATGTTGAATCCTGTGGTAATTTTAAAGTTACAAAAGGAAAAGCTAAAAAAGGT | 1822 |
| gb:LC522975 | Organism:Severe | AAACAAATGTTGAATCCTGTGGTAATTTTAAAGTTACAAAAGGAAAAGCTAAAAAAGGT | 1819 |
| gb:LC522973 | Organism:Severe | AAACAAATGTTGAATCCTGTGGTAATTTTAAAGTTACAAAAGGAAAAGCTAAAAAAGGT | 1819 |
| gb:LC522974 | Organism:Severe | AAACAAATGTTGAATCCTGTGGTAATTTTAAAGTTACAAAAGGAAAAGCTAAAAAAGGT | 1819 |
| gb:MN985325 | Organism:Severe | AAACAAATGTTGAATCCTGTGGTAATTTTAAAGTTACAAAAGGAAAAGCTAAAAAAGGT | 1822 |
| gb:MT020881 | Organism:Severe | AAACAAATGTTGAATCCTGTGGTAATTTTAAAGTTACAAAAGGAAAAGCTAAAAAAGGT | 1822 |
| gb:MT020880 | Organism:Severe | AAACAAATGTTGAATCCTGTGGTAATTTTAAAGTTACAAAAGGAAAAGCTAAAAAAGGT | 1822 |
| gb:MT066175 | Organism:Severe | AAACAAATGTTGAATCCTGTGGTAATTTTAAAGTTACAAAAGGAAAAGCTAAAAAAGGT | 1822 |
| gb:MN997409 | Organism:Severe | AAACAAATGTTGAATCCTGTGGTAATTTTAAAGTTACAAAAGGAAAAGCTAAAAAAGGT | 1822 |
| gb:MN938384 | Organism:Severe | AAACAAATGTTGAATCCTGTGGTAATTTTAAAGTTACAAAAGGAAAAGCTAAAAAAGGT | 1790 |
| gb:MT044258 | Organism:Severe | AAACAAATGTTGAATCCTGTGGTAATTTTAAAGTTACAAAAGGAAAAGCTAAAAAAGGT | 1798 |
| gb:MT039890 | Organism:Severe | AAACAAATGTTGAATCCTGTGGTAATTTTAAAGTTACAAAAGGAAAAGCTAAAAAAGGT | 1822 |
| gb:MN988713 | Organism:Severe | AAACAAATGTTGAATCCTGTGGTAATTTTAAAGTTACAAAAGGAAAAGCTAAAAAAGGT | 1822 |
| gb:LC521925 | Organism:Severe | AAACAAATGTTGAATCCTGTGGTAATTTTAAAGTTACAAAAGGAAAAGCTAAAAAAGGT | 1795 |
| gb:MT093571 | Organism:Severe | AAACAAATGTTGAATCCTGTGGTAATTTTAAAGTTACAAAAGGAAAAGCTAAAAAAGGT | 1822 |
| gb:MT039887 | Organism:Severe | AAACAAATGTTGAATCCTGTGGTAATTTTAAAGTTACAAAAGGAAAAGCTAAAAAAGGT | 1822 |
| gb:MT019530 | Organism:Severe | AAACAAATGTTGAATCCTGTGGTAATTTTAAAGTTACAAAAGGAAAAGCTAAAAAAGGT | 1822 |
| gb:MT039888 | Organism:Severe | AAACAAATGTTGAATCCTGTGGTAATTTTAAAGTTACAAAAGGAAAAGCTAAAAAAGGT | 1822 |
| gb:LC522972 | Organism:Severe | AAACAAATGTTGAATCCTGTGGTAATTTTAAAGTTACAAAAGGAAAAGCTAAAAAAGGT | 1819 |
| gb:MT027063 | Organism:Severe | AAACAAATGTTGAATCCTGTGGTAATTTTAAAGTTACAAAAGGAAAAGCTAAAAAAGGT | 1822 |
| gb:MT027062 | Organism:Severe | AAACAAATGTTGAATCCTGTGGTAATTTTAAAGTTACAAAAGGAAAAGCTAAAAAAGGT | 1822 |
| gb:MT019529 | Organism:Severe | AAACAAATGTTGAATCCTGTGGTAATTTTAAAGTTACAAAAGGAAAAGCTAAAAAAGGT | 1822 |
| gb:MN996529 | Organism:Severe | AAACAAATGTTGAATCCTGTGGTAATTTTAAAGTTACAAAAGGAAAAGCTAAAAAAGGT | 1810 |
| gb:MN996531 | Organism:Severe | AAACAAATGTTGAATCCTGTGGTAATTTTAAAGTTACAAAAGGAAAAGCTAAAAAAGGT | 1809 |
| gb:MT066176 | Organism:Severe | AAACAAATGTTGAATCCTGTGGTAATTTTAAAGTTACAAAAGGAAAAGCTAAAAAAGGT | 1822 |
| gb:MT027064 | Organism:Severe | AAACAAATGTTGAATCCTGTGGTAATTTTAAAGTTACAAAAGGAAAAGCTAAAAAAGGT | 1822 |
| gb:MN994468 | Organism:Severe | AAACAAATGTTGAATCCTGTGGTAATTTTAAAGTTACAAAAGGAAAAGCTAAAAAAGGT | 1822 |
| gb:MT072688 | Organism:Severe | AAACAAATGTTGAATCCTGTGGTAATTTTAAAGTTACAAAAGGAAAAGCTAAAAAAGGT | 1807 |
| gb:MN996527 | Organism:Severe | AAACAAATGTTGAATCCTGTGGTAATTTTAAAGTTACAAAAGGAAAAGCTAAAAAAGGT | 1789 |
| gb:MT093631 | Organism:Severe | AAACAAATGTTGAATCCTGTGGTAATTTTAAAGTTACAAAAGGAAAAGCTAAAAAAGGT | 1860 |
| gb:MT106053 | Organism:Severe | AAACAAATGTTGAATCCTGTGGTAATTTTAAAGTTACAAAAGGAAAAGCTAAAAAAGGT | 1822 |
| gb:MT019533 | Organism:Severe | AAACAAATGTTGAATCCTGTGGTAATTTTAAAGTTACAAAAGGAAAAGCTAAAAAAGGT | 1822 |
| gb:MT019531 | Organism:Severe | AAACAAATGTTGAATCCTGTGGTAATTTTAAAGTTACAAAAGGAAAAGCTAAAAAAGGT | 1822 |
| gb:MN996528 | Organism:Severe | AAACAAATGTTGAATCCTGTGGTAATTTTAAAGTTACAAAAGGAAAAGCTAAAAAAGGT | 1822 |
| gb:MN996530 | Organism:Severe | AAACAAATGTTGAATCCTGTGGTAATTTTAAAGTTACAAAAGGAAAAGCTAAAAAAGGT | 1808 |
| gb:MN908947 | Organism:Severe | AAACAAATGTTGAATCCTGTGGTAATTTTAAAGTTACAAAAGGAAAAGCTAAAAAAGGT | 1822 |
| gb:MT019532 | Organism:Severe | AAACAAATGTTGAATCCTGTGGTAATTTTAAAGTTACAAAAGGAAAAGCTAAAAAAGGT | 1822 |

\*\*\*\*\*





|             |                 |                                                           |      |
|-------------|-----------------|-----------------------------------------------------------|------|
| gb:MN988713 | Organism:Severe | GCTGCTCGTGTGTACGATCAATTTTCTCCCGCACTTTGAAACTGCTCAAAATCTGTG | 1942 |
| gb:LC521925 | Organism:Severe | GCTGCTCGTGTGTACGATCAATTTTCTCTCGCACTTTGAAACTGCTCAAAATCTGTG | 1915 |
| gb:MT093571 | Organism:Severe | GCTGCTCGTGTGTACGATCAATTTTCTCCCGCACTTTGAAACTGCTCAAAATCTGTG | 1942 |
| gb:MT039887 | Organism:Severe | GCTGCTCGTGTGTACGATCAATTTTCTCCCGCACTTTGAAACTGCTCAAAATCTGTG | 1942 |
| gb:MT019530 | Organism:Severe | GCTGCTCGTGTGTACGATCAATTTTCTCCCGCACTTTGAAACTGCTCAAAATCTGTG | 1942 |
| gb:MT039888 | Organism:Severe | GCTGCTCGTGTGTACGATCAATTTTCTCCCGCACTTTGAAACTGCTCAAAATCTGTG | 1942 |
| gb:LC522972 | Organism:Severe | GCTGCTCGTGTGTACGATCAATTTTCTCCCGCACTTTGAAACTGCTCAAAATCTGTG | 1939 |
| gb:MT027063 | Organism:Severe | GCTGCTCGTGTGTACGATCAATTTTCTCCCGCACTTTGAAACTGCTCAAAATCTGTG | 1942 |
| gb:MT027062 | Organism:Severe | GCTGCTCGTGTGTACGATCAATTTTCTCCCGCACTTTGAAACTGCTCAAAATCTGTG | 1942 |
| gb:MT019529 | Organism:Severe | GCTGCTCGTGTGTACGATCAATTTTCTCCCGCACTTTGAAACTGCTCAAAATCTGTG | 1942 |
| gb:MN996529 | Organism:Severe | GCTGCTCGTGTGTACGATCAATTTTCTCCCGCACTTTGAAACTGCTCAAAATCTGTG | 1930 |
| gb:MN996531 | Organism:Severe | GCTGCTCGTGTGTACGATCAATTTTCTCCCGCACTTTGAAACTGCTCAAAATCTGTG | 1929 |
| gb:MT066176 | Organism:Severe | GCTGCTCGTGTGTACGATCAATTTTCTCCCGCACTTTGAAACTGCTCAAAATCTGTG | 1942 |
| gb:MT027064 | Organism:Severe | GCTGCTCGTGTGTACGATCAATTTTCTCCCGCACTTTGAAACTGCTCAAAATCTGTG | 1942 |
| gb:MN994468 | Organism:Severe | GCTGCTCGTGTGTACGATCAATTTTCTCCCGCACTTTGAAACTGCTCAAAATCTGTG | 1942 |
| gb:MT072688 | Organism:Severe | GCTGCTCGTGTGTACGATCAATTTTCTCCCGCACTTTGAAACTGCTCAAAATCTGTG | 1927 |
| gb:MN996527 | Organism:Severe | GCTGCTCGTGTGTACGATCAATTTTCTCCCGCACTTTGAAACTGCTCAAAATCTGTG | 1909 |
| gb:MT093631 | Organism:Severe | GCTGCTCGTGTGTACGATCAATTTTCTCCCGCACTTTGAAACTGCTCAAAATCTGTG | 1980 |
| gb:MT106053 | Organism:Severe | GCTGCTCGTGTGTACGATCAATTTTCTCCCGCACTTTGAAACTGCTCAAAATCTGTG | 1942 |
| gb:MT019533 | Organism:Severe | GCTGCTCGTGTGTACGATCAATTTTCTCCCGCACTTTGAAACTGCTCAAAATCTGTG | 1942 |
| gb:MT019531 | Organism:Severe | GCTGCTCGTGTGTACGATCAATTTTCTCCCGCACTTTGAAACTGCTCAAAATCTGTG | 1942 |
| gb:MN996528 | Organism:Severe | GCTGCTCGTGTGTACGATCAATTTTCTCCCGCACTTTGAAACTGCTCAAAATCTGTG | 1942 |
| gb:MN996530 | Organism:Severe | GCTGCTCGTGTGTACGATCAATTTTCTCCCGCACTTTGAAACTGCTCAAAATCTGTG | 1928 |
| gb:MN908947 | Organism:Severe | GCTGCTCGTGTGTACGATCAATTTTCTCCCGCACTTTGAAACTGCTCAAAATCTGTG | 1942 |
| gb:MT019532 | Organism:Severe | GCTGCTCGTGTGTACGATCAATTTTCTCCCGCACTTTGAAACTGCTCAAAATCTGTG | 1942 |

\*\*\*\*\*

|             |                 |                                                             |      |
|-------------|-----------------|-------------------------------------------------------------|------|
| gb:MT020781 | Organism:Severe | CGTGTTTTACAGAAGGCCGCTATAACAATACTAGATGGAATTTACAGTATTCAGTGAGA | 1990 |
| gb:MT007544 | Organism:Severe | CGTGTTTTACAGAAGGCCGCTATAACAATACTAGATGGAATTTACAGTATTCAGTGAGA | 2002 |
| gb:MN994467 | Organism:Severe | CGTGTTTTACAGAAGGCCGCTATAACAATACTAGATGGAATTTACAGTATTCAGTGAGA | 2002 |
| gb:MT044257 | Organism:Severe | CGTGTTTTACAGAAGGCCGCTATAACAATACTAGATGGAATTTACAGTATTCAGTGAGA | 2002 |
| gb:MT106054 | Organism:Severe | CGTGTTTTACAGAAGGCCGCTATAACAATACTAGATGGAATTTACAGTATTCAGTGAGA | 2002 |
| gb:MT049951 | Organism:Severe | CGTGTTTTACAGAAGGCCGCTATAACAATACTAGATGGAATTTACAGTATTCAGTGAGA | 2002 |
| gb:MN975262 | Organism:Severe | CGTGTTTTACAGAAGGCCGCTATAACAATACTAGATGGAATTTACAGTATTCAGTGAGA | 2002 |
| gb:MT106052 | Organism:Severe | CGTGTTTTACAGAAGGCCGCTATAACAATACTAGATGGAATTTACAGTATTCAGTGAGA | 2002 |
| gb:LC522975 | Organism:Severe | CGTGTTTTACAGAAGGCCGCTATAACAATACTAGATGGAATTTACAGTATTCAGTGAGA | 1999 |
| gb:LC522973 | Organism:Severe | CGTGTTTTACAGAAGGCCGCTATAACAATACTAGATGGAATTTACAGTATTCAGTGAGA | 1999 |
| gb:LC522974 | Organism:Severe | CGTGTTTTACAGAAGGCCGCTATAACAATACTAGATGGAATTTACAGTATTCAGTGAGA | 1999 |
| gb:MN985325 | Organism:Severe | CGTGTTTTACAGAAGGCCGCTATAACAATACTAGATGGAATTTACAGTATTCAGTGAGA | 2002 |
| gb:MT020881 | Organism:Severe | CGTGTTTTACAGAAGGCCGCTATAACAATACTAGATGGAATTTACAGTATTCAGTGAGA | 2002 |
| gb:MT020880 | Organism:Severe | CGTGTTTTACAGAAGGCCGCTATAACAATACTAGATGGAATTTACAGTATTCAGTGAGA | 2002 |
| gb:MT066175 | Organism:Severe | CGTGTTTTACAGAAGGCCGCTATAACAATACTAGATGGAATTTACAGTATTCAGTGAGA | 2002 |
| gb:MN997409 | Organism:Severe | CGTGTTTTACAGAAGGCCGCTATAACAATACTAGATGGAATTTACAGTATTCAGTGAGA | 2002 |
| gb:MN938384 | Organism:Severe | CGTGTTTTACAGAAGGCCGCTATAACAATACTAGATGGAATTTACAGTATTCAGTGAGA | 1970 |
| gb:MT044258 | Organism:Severe | CGTGTTTTACAGAAGGCCGCTATAACAATACTAGATGGAATTTACAGTATTCAGTGAGA | 1978 |
| gb:MT039890 | Organism:Severe | CGTGTTTTACAGAAGGCCGCTATAACAATACTAGATGGAATTTACAGTATTCAGTGAGA | 2002 |
| gb:MN988713 | Organism:Severe | CGTGTTTTACAGAAGGCCGCTATAACAATACTAGATGGAATTTACAGTATTCAGTGAGA | 2002 |
| gb:LC521925 | Organism:Severe | CGTGTTTTACAGAAGGCCGCTATAACAATACTAGATGGAATTTACAGTATTCAGTGAGA | 1975 |
| gb:MT093571 | Organism:Severe | CGTGTTTTACAGAAGGCCGCTATAACAATACTAGATGGAATTTACAGTATTCAGTGAGA | 2002 |
| gb:MT039887 | Organism:Severe | CGTGTTTTACAGAAGGCCGCTATAACAATACTAGATGGAATTTACAGTATTCAGTGAGA | 2002 |
| gb:MT019530 | Organism:Severe | CGTGTTTTACAGAAGGCCGCTATAACAATACTAGATGGAATTTACAGTATTCAGTGAGA | 2002 |
| gb:MT039888 | Organism:Severe | CGTGTTTTACAGAAGGCCGCTATAACAATACTAGATGGAATTTACAGTATTCAGTGAGA | 2002 |
| gb:LC522972 | Organism:Severe | CGTGTTTTACAGAAGGCCGCTATAACAATACTAGATGGAATTTACAGTATTCAGTGAGA | 1999 |
| gb:MT027063 | Organism:Severe | CGTGTTTTACAGAAGGCCGCTATAACAATACTAGATGGAATTTACAGTATTCAGTGAGA | 2002 |
| gb:MT027062 | Organism:Severe | CGTGTTTTACAGAAGGCCGCTATAACAATACTAGATGGAATTTACAGTATTCAGTGAGA | 2002 |
| gb:MT019529 | Organism:Severe | CGTGTTTTACAGAAGGCCGCTATAACAATACTAGATGGAATTTACAGTATTCAGTGAGA | 2002 |
| gb:MN996529 | Organism:Severe | CGTGTTTTACAGAAGGCCGCTATAACAATACTAGATGGAATTTACAGTATTCAGTGAGA | 1990 |
| gb:MN996531 | Organism:Severe | CGTGTTTTACAGAAGGCCGCTATAACAATACTAGATGGAATTTACAGTATTCAGTGAGA | 1989 |
| gb:MT066176 | Organism:Severe | CGTGTTTTACAGAAGGCCGCTATAACAATACTAGATGGAATTTACAGTATTCAGTGAGA | 2002 |
| gb:MT027064 | Organism:Severe | CGTGTTTTACAGAAGGCCGCTATAACAATACTAGATGGAATTTACAGTATTCAGTGAGA | 2002 |
| gb:MN994468 | Organism:Severe | CGTGTTTTACAGAAGGCCGCTATAACAATACTAGATGGAATTTACAGTATTCAGTGAGA | 2002 |
| gb:MT072688 | Organism:Severe | CGTGTTTTACAGAAGGCCGCTATAACAATACTAGATGGAATTTACAGTATTCAGTGAGA | 1987 |
| gb:MN996527 | Organism:Severe | CGTGTTTTACAGAAGGCCGCTATAACAATACTAGATGGAATTTACAGTATTCAGTGAGA | 1969 |
| gb:MT093631 | Organism:Severe | CGTGTTTTACAGAAGGCCGCTATAACAATACTAGATGGAATTTACAGTATTCAGTGAGA | 2040 |
| gb:MT106053 | Organism:Severe | CGTGTTTTACAGAAGGCCGCTATAACAATACTAGATGGAATTTACAGTATTCAGTGAGA | 2002 |

|             |                 |                                                              |      |
|-------------|-----------------|--------------------------------------------------------------|------|
| gb:MT019533 | Organism:Severe | CGTGTTTTACAGAAGGCCGCTATAACAATACTAGATGGAATTTACAGTATTTCACTGAGA | 2002 |
| gb:MT019531 | Organism:Severe | CGTGTTTTACAGAAGGCCGCTATAACAATACTAGATGGAATTTACAGTATTTCACTGAGA | 2002 |
| gb:MN996528 | Organism:Severe | CGTGTTTTACAGAAGGCCGCTATAACAATACTAGATGGAATTTACAGTATTTCACTGAGA | 2002 |
| gb:MN996530 | Organism:Severe | CGTGTTTTACAGAAGGCCGCTATAACAATACTAGATGGAATTTACAGTATTTCACTGAGA | 1988 |
| gb:MN908947 | Organism:Severe | CGTGTTTTACAGAAGGCCGCTATAACAATACTAGATGGAATTTACAGTATTTCACTGAGA | 2002 |
| gb:MT019532 | Organism:Severe | CGTGTTTTACAGAAGGCCGCTATAACAATACTAGATGGAATTTACAGTATTTCACTGAGA | 2002 |

\*\*\*\*\*

|             |                 |                                                              |      |
|-------------|-----------------|--------------------------------------------------------------|------|
| gb:MT020781 | Organism:Severe | CTCATTGATGCTATGATGTTTACATCTGATTTGGCTACTAACAATCTAGTTGTAATGGCC | 2050 |
| gb:MT007544 | Organism:Severe | CTCATTGATGCTATGATGTTTACATCTGATTTGGCTACTAACAATCTAGTTGTAATGGCC | 2062 |
| gb:MN994467 | Organism:Severe | CTCATTGATGCTATGATGTTTACATCTGATTTGGCTACTAACAATCTAGTTGTAATGGCC | 2062 |
| gb:MT044257 | Organism:Severe | CTCATTGATGCTATGATGTTTACATCTGATTTGGCTACTAACAATCTAGTTGTAATGGCC | 2062 |
| gb:MT106054 | Organism:Severe | CTCATTGATGCTATGATGTTTACATCTGATTTGGCTACTAACAATCTAGTTGTAATGGCC | 2062 |
| gb:MT049951 | Organism:Severe | CTCATTGATGCTATGATGTTTACATCTGATTTGGCTACTAACAATCTAGTTGTAATGGCC | 2062 |
| gb:MN975262 | Organism:Severe | CTCATTGATGCTATGATGTTTACATCTGATTTGGCTACTAACAATCTAGTTGTAATGGCC | 2062 |
| gb:MT106052 | Organism:Severe | CTCATTGATGCTATGATGTTTACATCTGATTTGGCTACTAACAATCTAGTTGTAATGGCC | 2062 |
| gb:LC522975 | Organism:Severe | CTCATTGATGCTATGATGTTTACATCTGATTTGGCTACTAACAATCTAGTTGTAATGGCC | 2059 |
| gb:LC522973 | Organism:Severe | CTCATTGATGCTATGATGTTTACATCTGATTTGGCTACTAACAATCTAGTTGTAATGGCC | 2059 |
| gb:LC522974 | Organism:Severe | CTCATTGATGCTATGATGTTTACATCTGATTTGGCTACTAACAATCTAGTTGTAATGGCC | 2059 |
| gb:MN985325 | Organism:Severe | CTCATTGATGCTATGATGTTTACATCTGATTTGGCTACTAACAATCTAGTTGTAATGGCC | 2062 |
| gb:MT020881 | Organism:Severe | CTCATTGATGCTATGATGTTTACATCTGATTTGGCTACTAACAATCTAGTTGTAATGGCC | 2062 |
| gb:MT020880 | Organism:Severe | CTCATTGATGCTATGATGTTTACATCTGATTTGGCTACTAACAATCTAGTTGTAATGGCC | 2062 |
| gb:MT066175 | Organism:Severe | CTCATTGATGCTATGATGTTTACATCTGATTTGGCTACTAACAATCTAGTTGTAATGGCC | 2062 |
| gb:MN997409 | Organism:Severe | CTCATTGATGCTATGATGTTTACATCTGATTTGGCTACTAACAATCTAGTTGTAATGGCC | 2062 |
| gb:MN938384 | Organism:Severe | CTCATTGATGCTATGATGTTTACATCTGATTTGGCTACTAACAATCTAGTTGTAATGGCC | 2030 |
| gb:MT044258 | Organism:Severe | CTCATTGATGCTATGATGTTTACATCTGATTTGGCTACTAACAATCTAGTTGTAATGGCC | 2038 |
| gb:MT039890 | Organism:Severe | CTCATTGATGCTATGATGTTTACATCTGATTTGGCTACTAACAATCTAGTTGTAATGGCC | 2062 |
| gb:MN988713 | Organism:Severe | CTCATTGATGCTATGATGTTTACATCTGATTTGGCTACTAACAATCTAGTTGTAATGGCC | 2062 |
| gb:LC521925 | Organism:Severe | CTCATTGATGCTATGATGTTTACATCTGATTTGGCTACTAACAATCTAGTTGTAATGGCC | 2035 |
| gb:MT093571 | Organism:Severe | CTCATTGATGCTATGATGTTTACATCTGATTTGGCTACTAACAATCTAGTTGTAATGGCC | 2062 |
| gb:MT039887 | Organism:Severe | CTCATTGATGCTATGATGTTTACATCTGATTTGGCTACTAACAATCTAGTTGTAATGGCC | 2062 |
| gb:MT019530 | Organism:Severe | CTCATTGATGCTATGATGTTTACATCTGATTTGGCTACTAACAATCTAGTTGTAATGGCC | 2062 |
| gb:MT039888 | Organism:Severe | CTCATTGATGCTATGATGTTTACATCTGATTTGGCTACTAACAATCTAGTTGTAATGGCC | 2062 |
| gb:LC522972 | Organism:Severe | CTCATTGATGCTATGATGTTTACATCTGATTTGGCTACTAACAATCTAGTTGTAATGGCC | 2059 |
| gb:MT027063 | Organism:Severe | CTCATTGATGCTATGATGTTTACATCTGATTTGGCTACTAACAATCTAGTTGTAATGGCC | 2062 |
| gb:MT027062 | Organism:Severe | CTCATTGATGCTATGATGTTTACATCTGATTTGGCTACTAACAATCTAGTTGTAATGGCC | 2062 |
| gb:MT019529 | Organism:Severe | CTCATTGATGCTATGATGTTTACATCTGATTTGGCTACTAACAATCTAGTTGTAATGGCC | 2062 |
| gb:MN996529 | Organism:Severe | CTCATTGATGCTATGATGTTTACATCTGATTTGGCTACTAACAATCTAGTTGTAATGGCC | 2050 |
| gb:MN996531 | Organism:Severe | CTCATTGATGCTATGATGTTTACATCTGATTTGGCTACTAACAATCTAGTTGTAATGGCC | 2049 |
| gb:MT066176 | Organism:Severe | CTCATTGATGCTATGATGTTTACATCTGATTTGGCTACTAACAATCTAGTTGTAATGGCC | 2062 |
| gb:MT027064 | Organism:Severe | CTCATTGATGCTATGATGTTTACATCTGATTTGGCTACTAACAATCTAGTTGTAATGGCC | 2062 |
| gb:MN994468 | Organism:Severe | CTCATTGATGCTATGATGTTTACATCTGATTTGGCTACTAACAATCTAGTTGTAATGGCC | 2062 |
| gb:MT072688 | Organism:Severe | CTCATTGATGCTATGATGTTTACATCTGATTTGGCTACTAACAATCTAGTTGTAATGGCC | 2047 |
| gb:MN996527 | Organism:Severe | CTCATTGATGCTATGATGTTTACATCTGATTTGGCTACTAACAATCTAGTTGTAATGGCC | 2029 |
| gb:MT093631 | Organism:Severe | CTCATTGATGCTATGATGTTTACATCTGATTTGGCTACTAACAATCTAGTTGTAATGGCC | 2100 |
| gb:MT106053 | Organism:Severe | CTCATTGATGCTATGATGTTTACATCTGATTTGGCTACTAACAATCTAGTTGTAATGGCC | 2062 |
| gb:MT019533 | Organism:Severe | CTCATTGATGCTATGATGTTTACATCTGATTTGGCTACTAACAATCTAGTTGTAATGGCC | 2062 |
| gb:MT019531 | Organism:Severe | CTCATTGATGCTATGATGTTTACATCTGATTTGGCTACTAACAATCTAGTTGTAATGGCC | 2062 |
| gb:MN996528 | Organism:Severe | CTCATTGATGCTATGATGTTTACATCTGATTTGGCTACTAACAATCTAGTTGTAATGGCC | 2062 |
| gb:MN996530 | Organism:Severe | CTCATTGATGCTATGATGTTTACATCTGATTTGGCTACTAACAATCTAGTTGTAATGGCC | 2048 |
| gb:MN908947 | Organism:Severe | CTCATTGATGCTATGATGTTTACATCTGATTTGGCTACTAACAATCTAGTTGTAATGGCC | 2062 |
| gb:MT019532 | Organism:Severe | CTCATTGATGCTATGATGTTTACATCTGATTTGGCTACTAACAATCTAGTTGTAATGGCC | 2062 |

\*\*\*\*\*

|             |                 |                                                               |      |
|-------------|-----------------|---------------------------------------------------------------|------|
| gb:MT020781 | Organism:Severe | TACATTACAGGTGGTGTGTTTTCAGTTGACTTCGCAGTGGCTAACTAACATCTTTGGCACT | 2110 |
| gb:MT007544 | Organism:Severe | TACATTACAGGTGGTGTGTTTTCAGTTGACTTCGCAGTGGCTAACTAACATCTTTGGCACT | 2122 |
| gb:MN994467 | Organism:Severe | TACATTACAGGTGGTGTGTTTTCAGTTGACTTCGCAGTGGCTAACTAACATCTTTGGCACT | 2122 |
| gb:MT044257 | Organism:Severe | TACATTACAGGTGGTGTGTTTTCAGTTGACTTCGCAGTGGCTAACTAACATCTTTGGCACT | 2122 |
| gb:MT106054 | Organism:Severe | TACATTACAGGTGGTGTGTTTTCAGTTGACTTCGCAGTGGCTAACTAACATCTTTGGCACT | 2122 |
| gb:MT049951 | Organism:Severe | TACATTACAGGTGGTGTGTTTTCAGTTGACTTCGCAGTGGCTAACTAACATCTTTGGCACT | 2122 |
| gb:MN975262 | Organism:Severe | TACATTACAGGTGGTGTGTTTTCAGTTGACTTCGCAGTGGCTAACTAACATCTTTGGCACT | 2122 |
| gb:MT106052 | Organism:Severe | TACATTACAGGTGGTGTGTTTTCAGTTGACTTCGCAGTGGCTAACTAACATCTTTGGCACT | 2122 |
| gb:LC522975 | Organism:Severe | TACATTACAGGTGGTGTGTTTTCAGTTGACTTCGCAGTGGCTAACTAACATCTTTGGCACT | 2119 |
| gb:LC522973 | Organism:Severe | TACATTACAGGTGGTGTGTTTTCAGTTGACTTCGCAGTGGCTAACTAACATCTTTGGCACT | 2119 |
| gb:LC522974 | Organism:Severe | TACATTACAGGTGGTGTGTTTTCAGTTGACTTCGCAGTGGCTAACTAACATCTTTGGCACT | 2119 |

|             |                 |                                                               |      |
|-------------|-----------------|---------------------------------------------------------------|------|
| gb:MN985325 | Organism:Severe | TACATTACAGGTGGTGTGTTTCAGTTGACTTCGCAGTGGCTAACATAACATCTTTGGCACT | 2122 |
| gb:MT020881 | Organism:Severe | TACATTACAGGTGGTGTGTTTCAGTTGACTTCGCAGTGGCTAACATAACATCTTTGGCACT | 2122 |
| gb:MT020880 | Organism:Severe | TACATTACAGGTGGTGTGTTTCAGTTGACTTCGCAGTGGCTAACATAACATCTTTGGCACT | 2122 |
| gb:MT066175 | Organism:Severe | TACATTACAGGTGGTGTGTTTCAGTTGACTTCGCAGTGGCTAACATAACATCTTTGGCACT | 2122 |
| gb:MN997409 | Organism:Severe | TACATTACAGGTGGTGTGTTTCAGTTGACTTCGCAGTGGCTAACATAACATCTTTGGCACT | 2122 |
| gb:MN938384 | Organism:Severe | TACATTACAGGTGGTGTGTTTCAGTTGACTTCGCAGTGGCTAACATAACATCTTTGGCACT | 2090 |
| gb:MT044258 | Organism:Severe | TACATTACAGGTGGTGTGTTTCAGTTGACTTCGCAGTGGCTAACATAACATCTTTGGCACT | 2098 |
| gb:MT039890 | Organism:Severe | TACATTACAGGTGGTGTGTTTCAGTTGACTTCGCAGTGGCTAACATAACATCTTTGGCACT | 2122 |
| gb:MN988713 | Organism:Severe | TACATTACAGGTGGTGTGTTTCAGTTGACTTCGCAGTGGCTAACATAACATCTTTGGCACT | 2122 |
| gb:LC521925 | Organism:Severe | TACATTACAGGTGGTGTGTTTCAGTTGACTTCGCAGTGGCTAACATAACATCTTTGGCACT | 2095 |
| gb:MT093571 | Organism:Severe | TACATTACAGGTGGTGTGTTTCAGTTGACTTCGCAGTGGCTAACATAACATCTTTGGCACT | 2122 |
| gb:MT039887 | Organism:Severe | TACATTACAGGTGGTGTGTTTCAGTTGACTTCGCAGTGGCTAACATAACATCTTTGGCACT | 2122 |
| gb:MT019530 | Organism:Severe | TACATTACAGGTGGTGTGTTTCAGTTGACTTCGCAGTGGCTAACATAACATCTTTGGCACT | 2122 |
| gb:MT039888 | Organism:Severe | TACATTACAGGTGGTGTGTTTCAGTTGACTTCGCAGTGGCTAACATAACATCTTTGGCACT | 2122 |
| gb:LC522972 | Organism:Severe | TACATTACAGGTGGTGTGTTTCAGTTGACTTCGCAGTGGCTAACATAACATCTTTGGCACT | 2119 |
| gb:MT027063 | Organism:Severe | TACATTACAGGTGGTGTGTTTCAGTTGACTTCGCAGTGGCTAACATAACATCTTTGGCACT | 2122 |
| gb:MT027062 | Organism:Severe | TACATTACAGGTGGTGTGTTTCAGTTGACTTCGCAGTGGCTAACATAACATCTTTGGCACT | 2122 |
| gb:MT019529 | Organism:Severe | TACATTACAGGTGGTGTGTTTCAGTTGACTTCGCAGTGGCTAACATAACATCTTTGGCACT | 2122 |
| gb:MN996529 | Organism:Severe | TACATTACAGGTGGTGTGTTTCAGTTGACTTCGCAGTGGCTAACATAACATCTTTGGCACT | 2110 |
| gb:MN996531 | Organism:Severe | TACATTACAGGTGGTGTGTTTCAGTTGACTTCGCAGTGGCTAACATAACATCTTTGGCACT | 2109 |
| gb:MT066176 | Organism:Severe | TACATTACAGGTGGTGTGTTTCAGTTGACTTCGCAGTGGCTAACATAACATCTTTGGCACT | 2122 |
| gb:MT027064 | Organism:Severe | TACATTACAGGTGGTGTGTTTCAGTTGACTTCGCAGTGGCTAACATAACATCTTTGGCACT | 2122 |
| gb:MN994468 | Organism:Severe | TACATTACAGGTGGTGTGTTTCAGTTGACTTCGCAGTGGCTAACATAACATCTTTGGCACT | 2122 |
| gb:MT072688 | Organism:Severe | TACATTACAGGTGGTGTGTTTCAGTTGACTTCGCAGTGGCTAACATAACATCTTTGGCACT | 2107 |
| gb:MN996527 | Organism:Severe | TACATTACAGGTGGTGTGTTTCAGTTGACTTCGCAGTGGCTAACATAACATCTTTGGCACT | 2089 |
| gb:MT093631 | Organism:Severe | TACATTACAGGTGGTGTGTTTCAGTTGACTTCGCAGTGGCTAACATAACATCTTTGGCACT | 2160 |
| gb:MT106053 | Organism:Severe | TACATTACAGGTGGTGTGTTTCAGTTGACTTCGCAGTGGCTAACATAACATCTTTGGCACT | 2122 |
| gb:MT019533 | Organism:Severe | TACATTACAGGTGGTGTGTTTCAGTTGACTTCGCAGTGGCTAACATAACATCTTTGGCACT | 2122 |
| gb:MT019531 | Organism:Severe | TACATTACAGGTGGTGTGTTTCAGTTGACTTCGCAGTGGCTAACATAACATCTTTGGCACT | 2122 |
| gb:MN996528 | Organism:Severe | TACATTACAGGTGGTGTGTTTCAGTTGACTTCGCAGTGGCTAACATAACATCTTTGGCACT | 2122 |
| gb:MN996530 | Organism:Severe | TACATTACAGGTGGTGTGTTTCAGTTGACTTCGCAGTGGCTAACATAACATCTTTGGCACT | 2108 |
| gb:MN908947 | Organism:Severe | TACATTACAGGTGGTGTGTTTCAGTTGACTTCGCAGTGGCTAACATAACATCTTTGGCACT | 2122 |
| gb:MT019532 | Organism:Severe | TACATTACAGGTGGTGTGTTTCAGTTGACTTCGCAGTGGCTAACATAACATCTTTGGCACT | 2122 |

\*\*\*\*\*

|             |                 |                                                            |      |
|-------------|-----------------|------------------------------------------------------------|------|
| gb:MT020781 | Organism:Severe | GTTTATGAAAACTCAAACCCGTCCTTGATTGGCTTGAAGAGAAGTTAAGGAAGGTGTA | 2170 |
| gb:MT007544 | Organism:Severe | GTTTATGAAAACTCAAACCCGTCCTTGATTGGCTTGAAGAGAAGTTAAGGAAGGTGTA | 2182 |
| gb:MN994467 | Organism:Severe | GTTTATGAAAACTCAAACCCGTCCTTGATTGGCTTGAAGAGAAGTTAAGGAAGGTGTA | 2182 |
| gb:MT044257 | Organism:Severe | GTTTATGAAAACTCAAACCCGTCCTTGATTGGCTTGAAGAGAAGTTAAGGAAGGTGTA | 2182 |
| gb:MT106054 | Organism:Severe | GTTTATGAAAACTCAAACCCGTCCTTGATTGGCTTGAAGAGAAGTTAAGGAAGGTGTA | 2182 |
| gb:MT049951 | Organism:Severe | GTTTATGAAAACTCAAACCCGTCCTTGATTGGCTTGAAGAGAAGTTAAGGAAGGTGTA | 2182 |
| gb:MN975262 | Organism:Severe | GTTTATGAAAACTCAAACCCGTCCTTGATTGGCTTGAAGAGAAGTTAAGGAAGGTGTA | 2182 |
| gb:MT106052 | Organism:Severe | GTTTATGAAAACTCAAACCCGTCCTTGATTGGCTTGAAGAGAAGTTAAGGAAGGTGTA | 2182 |
| gb:LC522975 | Organism:Severe | GTTTATGAAAACTCAAACCCGTCCTTGATTGGCTTGAAGAGAAGTTAAGGAAGGTGTA | 2179 |
| gb:LC522973 | Organism:Severe | GTTTATGAAAACTCAAACCCGTCCTTGATTGGCTTGAAGAGAAGTTAAGGAAGGTGTA | 2179 |
| gb:LC522974 | Organism:Severe | GTTTATGAAAACTCAAACCCGTCCTTGATTGGCTTGAAGAGAAGTTAAGGAAGGTGTA | 2179 |
| gb:MN985325 | Organism:Severe | GTTTATGAAAACTCAAACCCGTCCTTGATTGGCTTGAAGAGAAGTTAAGGAAGGTGTA | 2182 |
| gb:MT020881 | Organism:Severe | GTTTATGAAAACTCAAACCCGTCCTTGATTGGCTTGAAGAGAAGTTAAGGAAGGTGTA | 2182 |
| gb:MT020880 | Organism:Severe | GTTTATGAAAACTCAAACCCGTCCTTGATTGGCTTGAAGAGAAGTTAAGGAAGGTGTA | 2182 |
| gb:MT066175 | Organism:Severe | GTTTATGAAAACTCAAACCCGTCCTTGATTGGCTTGAAGAGAAGTTAAGGAAGGTGTA | 2182 |
| gb:MN997409 | Organism:Severe | GTTTATGAAAACTCAAACCCGTCCTTGATTGGCTTGAAGAGAAGTTAAGGAAGGTGTA | 2182 |
| gb:MN938384 | Organism:Severe | GTTTATGAAAACTCAAACCCGTCCTTGATTGGCTTGAAGAGAAGTTAAGGAAGGTGTA | 2150 |
| gb:MT044258 | Organism:Severe | GTTTATGAAAACTCAAACCCGTCCTTGATTGGCTTGAAGAGAAGTTAAGGAAGGTGTA | 2158 |
| gb:MT039890 | Organism:Severe | GTTTATGAAAACTCAAACCCGTCCTTGATTGGCTTGAAGAGAAGTTAAGGAAGGTGTA | 2182 |
| gb:MN988713 | Organism:Severe | GTTTATGAAAACTCAAACCCGTCCTTGATTGGCTTGAAGAGAAGTTAAGGAAGGTGTA | 2182 |
| gb:LC521925 | Organism:Severe | GTTTATGAAAACTCAAACCCGTCCTTGATTGGCTTGAAGAGAAGTTAAGGAAGGTGTA | 2155 |
| gb:MT093571 | Organism:Severe | GTTTATGAAAACTCAAACCCGTCCTTGATTGGCTTGAAGAGAAGTTAAGGAAGGTGTA | 2182 |
| gb:MT039887 | Organism:Severe | GTTTATGAAAACTCAAACCCGTCCTTGATTGGCTTGAAGAGAAGTTAAGGAAGGTGTA | 2182 |
| gb:MT019530 | Organism:Severe | GTTTATGAAAACTCAAACCCGTCCTTGATTGGCTTGAAGAGAAGTTAAGGAAGGTGTA | 2182 |
| gb:MT039888 | Organism:Severe | GTTTATGAAAACTCAAACCCGTCCTTGATTGGCTTGAAGAGAAGTTAAGGAAGGTGTA | 2182 |
| gb:LC522972 | Organism:Severe | GTTTATGAAAACTCAAACCCGTCCTTGATTGGCTTGAAGAGAAGTTAAGGAAGGTGTA | 2179 |
| gb:MT027063 | Organism:Severe | GTTTATGAAAACTCAAACCCGTCCTTGATTGGCTTGAAGAGAAGTTAAGGAAGGTGTA | 2182 |
| gb:MT027062 | Organism:Severe | GTTTATGAAAACTCAAACCCGTCCTTGATTGGCTTGAAGAGAAGTTAAGGAAGGTGTA | 2182 |
| gb:MT019529 | Organism:Severe | GTTTATGAAAACTCAAACCCGTCCTTGATTGGCTTGAAGAGAAGTTAAGGAAGGTGTA | 2182 |
| gb:MN996529 | Organism:Severe | GTTTATGAAAACTCAAACCCGTCCTTGATTGGCTTGAAGAGAAGTTAAGGAAGGTGTA | 2170 |

|             |                 |                                                            |      |
|-------------|-----------------|------------------------------------------------------------|------|
| gb:MN996531 | Organism:Severe | GTTTATGAAAACTCAAACCCGTCCTTGATTGGCTTGAAGAGAAGTTAAGGAAGGTGTA | 2169 |
| gb:MT066176 | Organism:Severe | GTTTATGAAAACTCAAACCCGTCCTTGATTGGCTTGAAGAGAAGTTAAGGAAGGTGTA | 2182 |
| gb:MT027064 | Organism:Severe | GTTTATGAAAACTCAAACCCGTCCTTGATTGGCTTGAAGAGAAGTTAAGGAAGGTGTA | 2182 |
| gb:MN994468 | Organism:Severe | GTTTATGAAAACTCAAACCCGTCCTTGATTGGCTTGAAGAGAAGTTAAGGAAGGTGTA | 2182 |
| gb:MT072688 | Organism:Severe | GTTTATGAAAACTCAAACCCGTCCTTGATTGGCTTGAAGAGAAGTTAAGGAAGGTGTA | 2167 |
| gb:MN996527 | Organism:Severe | GTTTATGAAAACTCAAACCCGTCCTTGATTGGCTTGAAGAGAAGTTAAGGAAGGTGTA | 2149 |
| gb:MT093631 | Organism:Severe | GTTTATGAAAACTCAAACCCGTCCTTGATTGGCTTGAAGAGAAGTTAAGGAAGGTGTA | 2220 |
| gb:MT106053 | Organism:Severe | GTTTATGAAAACTCAAACCCGTCCTTGATTGGCTTGAAGAGAAGTTAAGGAAGGTGTA | 2182 |
| gb:MT019533 | Organism:Severe | GTTTATGAAAACTCAAACCCGTCCTTGATTGGCTTGAAGAGAAGTTAAGGAAGGTGTA | 2182 |
| gb:MT019531 | Organism:Severe | GTTTATGAAAACTCAAACCCGTCCTTGATTGGCTTGAAGAGAAGTTAAGGAAGGTGTA | 2182 |
| gb:MN996528 | Organism:Severe | GTTTATGAAAACTCAAACCCGTCCTTGATTGGCTTGAAGAGAAGTTAAGGAAGGTGTA | 2182 |
| gb:MN996530 | Organism:Severe | GTTTATGAAAACTCAAACCCGTCCTTGATTGGCTTGAAGAGAAGTTAAGGAAGGTGTA | 2168 |
| gb:MN908947 | Organism:Severe | GTTTATGAAAACTCAAACCCGTCCTTGATTGGCTTGAAGAGAAGTTAAGGAAGGTGTA | 2182 |
| gb:MT019532 | Organism:Severe | GTTTATGAAAACTCAAACCCGTCCTTGATTGGCTTGAAGAGAAGTTAAGGAAGGTGTA | 2182 |

\*\*\*\*\*

|             |                 |                                                              |      |
|-------------|-----------------|--------------------------------------------------------------|------|
| gb:MT020781 | Organism:Severe | GAGTTTCTTAGAGACGGTTGGGAAATTGTTAAATTTATCTCAACCTGTGCTTGTGAAATT | 2230 |
| gb:MT007544 | Organism:Severe | GAGTTTCTTAGAGACGGTTGGGAAATTGTTAAATTTATCTCAACCTGTGCTTGTGAAATT | 2242 |
| gb:MN994467 | Organism:Severe | GAGTTTCTTAGAGACGGTTGGGAAATTGTTAAATTTATCTCAACCTGTGCTTGTGAAATT | 2242 |
| gb:MT044257 | Organism:Severe | GAGTTTCTTAGAGACGGTTGGGAAATTGTTAAATTTATCTCAACCTGTGCTTGTGAAATT | 2242 |
| gb:MT106054 | Organism:Severe | GAGTTTCTTAGAGACGGTTGGGAAATTGTTAAATTTATCTCAACCTGTGCTTGTGAAATT | 2242 |
| gb:MT049951 | Organism:Severe | GAGTTTCTTAGAGACGGTTGGGAAATTGTTAAATTTATCTCAACCTGTGCTTGTGAAATT | 2242 |
| gb:MN975262 | Organism:Severe | GAGTTTCTTAGAGACGGTTGGGAAATTGTTAAATTTATCTCAACCTGTGCTTGTGAAATT | 2242 |
| gb:MT106052 | Organism:Severe | GAGTTTCTTAGAGACGGTTGGGAAATTGTTAAATTTATCTCAACCTGTGCTTGTGAAATT | 2242 |
| gb:LC522975 | Organism:Severe | GAGTTTCTTAGAGACGGTTGGGAAATTGTTAAATTTATCTCAACCTGTGCTTGTGAAATT | 2239 |
| gb:LC522973 | Organism:Severe | GAGTTTCTTAGAGACGGTTGGGAAATTGTTAAATTTATCTCAACCTGTGCTTGTGAAATT | 2239 |
| gb:LC522974 | Organism:Severe | GAGTTTCTTAGAGACGGTTGGGAAATTGTTAAATTTATCTCAACCTGTGCTTGTGAAATT | 2239 |
| gb:MN985325 | Organism:Severe | GAGTTTCTTAGAGACGGTTGGGAAATTGTTAAATTTATCTCAACCTGTGCTTGTGAAATT | 2242 |
| gb:MT020881 | Organism:Severe | GAGTTTCTTAGAGACGGTTGGGAAATTGTTAAATTTATCTCAACCTGTGCTTGTGAAATT | 2242 |
| gb:MT020880 | Organism:Severe | GAGTTTCTTAGAGACGGTTGGGAAATTGTTAAATTTATCTCAACCTGTGCTTGTGAAATT | 2242 |
| gb:MT066175 | Organism:Severe | GAGTTTCTTAGAGACGGTTGGGAAATTGTTAAATTTATCTCAACCTGTGCTTGTGAAATT | 2242 |
| gb:MN997409 | Organism:Severe | GAGTTTCTTAGAGACGGTTGGGAAATTGTTAAATTTATCTCAACCTGTGCTTGTGAAATT | 2242 |
| gb:MN938384 | Organism:Severe | GAGTTTCTTAGAGACGGTTGGGAAATTGTTAAATTTATCTCAACCTGTGCTTGTGAAATT | 2210 |
| gb:MT044258 | Organism:Severe | GAGTTTCTTAGAGACGGTTGGGAAATTGTTAAATTTATCTCAACCTGTGCTTGTGAAATT | 2218 |
| gb:MT039890 | Organism:Severe | GAGTTTCTTAGAGACGGTTGGGAAATTGTTAAATTTATCTCAACCTGTGCTTGTGAAATT | 2242 |
| gb:MN988713 | Organism:Severe | GAGTTTCTTAGAGACGGTTGGGAAATTGTTAAATTTATCTCAACCTGTGCTTGTGAAATT | 2242 |
| gb:LC521925 | Organism:Severe | GAGTTTCTTAGAGACGGTTGGGAAATTGTTAAATTTATCTCAACCTGTGCTTGTGAAATT | 2215 |
| gb:MT093571 | Organism:Severe | GAGTTTCTTAGAGACGGTTGGGAAATTGTTAAATTTATCTCAACCTGTGCTTGTGAAATT | 2242 |
| gb:MT039887 | Organism:Severe | GAGTTTCTTAGAGACGGTTGGGAAATTGTTAAATTTATCTCAACCTGTGCTTGTGAAATT | 2242 |
| gb:MT019530 | Organism:Severe | GAGTTTCTTAGAGACGGTTGGGAAATTGTTAAATTTATCTCAACCTGTGCTTGTGAAATT | 2242 |
| gb:MT039888 | Organism:Severe | GAGTTTCTTAGAGACGGTTGGGAAATTGTTAAATTTATCTCAACCTGTGCTTGTGAAATT | 2242 |
| gb:LC522972 | Organism:Severe | GAGTTTCTTAGAGACGGTTGGGAAATTGTTAAATTTATCTCAACCTGTGCTTGTGAAATT | 2239 |
| gb:MT027063 | Organism:Severe | GAGTTTCTTAGAGACGGTTGGGAAATTGTTAAATTTATCTCAACCTGTGCTTGTGAAATT | 2242 |
| gb:MT027062 | Organism:Severe | GAGTTTCTTAGAGACGGTTGGGAAATTGTTAAATTTATCTCAACCTGTGCTTGTGAAATT | 2242 |
| gb:MT019529 | Organism:Severe | GAGTTTCTTAGAGACGGTTGGGAAATTGTTAAATTTATCTCAACCTGTGCTTGTGAAATT | 2242 |
| gb:MN996529 | Organism:Severe | GAGTTTCTTAGAGACGGTTGGGAAATTGTTAAATTTATCTCAACCTGTGCTTGTGAAATT | 2230 |
| gb:MN996531 | Organism:Severe | GAGTTTCTTAGAGACGGTTGGGAAATTGTTAAATTTATCTCAACCTGTGCTTGTGAAATT | 2229 |
| gb:MT066176 | Organism:Severe | GAGTTTCTTAGAGACGGTTGGGAAATTGTTAAATTTATCTCAACCTGTGCTTGTGAAATT | 2242 |
| gb:MT027064 | Organism:Severe | GAGTTTCTTAGAGACGGTTGGGAAATTGTTAAATTTATCTCAACCTGTGCTTGTGAAATT | 2242 |
| gb:MN994468 | Organism:Severe | GAGTTTCTTAGAGACGGTTGGGAAATTGTTAAATTTATCTCAACCTGTGCTTGTGAAATT | 2242 |
| gb:MT072688 | Organism:Severe | GAGTTTCTTAGAGACGGTTGGGAAATTGTTAAATTTATCTCAACCTGTGCTTGTGAAATT | 2227 |
| gb:MN996527 | Organism:Severe | GAGTTTCTTAGAGACGGTTGGGAAATTGTTAAATTTATCTCAACCTGTGCTTGTGAAATT | 2209 |
| gb:MT093631 | Organism:Severe | GAGTTTCTTAGAGACGGTTGGGAAATTGTTAAATTTATCTCAACCTGTGCTTGTGAAATT | 2280 |
| gb:MT106053 | Organism:Severe | GAGTTTCTTAGAGACGGTTGGGAAATTGTTAAATTTATCTCAACCTGTGCTTGTGAAATT | 2242 |
| gb:MT019533 | Organism:Severe | GAGTTTCTTAGAGACGGTTGGGAAATTGTTAAATTTATCTCAACCTGTGCTTGTGAAATT | 2242 |
| gb:MT019531 | Organism:Severe | GAGTTTCTTAGAGACGGTTGGGAAATTGTTAAATTTATCTCAACCTGTGCTTGTGAAATT | 2242 |
| gb:MN996528 | Organism:Severe | GAGTTTCTTAGAGACGGTTGGGAAATTGTTAAATTTATCTCAACCTGTGCTTGTGAAATT | 2242 |
| gb:MN996530 | Organism:Severe | GAGTTTCTTAGAGACGGTTGGGAAATTGTTAAATTTATCTCAACCTGTGCTTGTGAAATT | 2228 |
| gb:MN908947 | Organism:Severe | GAGTTTCTTAGAGACGGTTGGGAAATTGTTAAATTTATCTCAACCTGTGCTTGTGAAATT | 2242 |
| gb:MT019532 | Organism:Severe | GAGTTTCTTAGAGACGGTTGGGAAATTGTTAAATTTATCTCAACCTGTGCTTGTGAAATT | 2242 |

\*\*\*\*\*

|             |                 |                                                             |      |
|-------------|-----------------|-------------------------------------------------------------|------|
| gb:MT020781 | Organism:Severe | GTCGGTGGACAAATTGTACCTGTGCAAAGGAAATTAAGGAGAGTGTTCAGACATTCTTT | 2290 |
| gb:MT007544 | Organism:Severe | GTCGGTGGACAAATTGTACCTGTGCAAAGGAAATTAAGGAGAGTGTTCAGACATTCTTT | 2302 |
| gb:MN994467 | Organism:Severe | GTCGGTGGACAAATTGTACCTGTGCAAAGGAAATTAAGGAGAGTGTTCAGACATTCTTT | 2302 |

|             |                 |                                                              |      |
|-------------|-----------------|--------------------------------------------------------------|------|
| gb:MT044257 | Organism:Severe | GTCGGTGGACAAATTGTACCTGTGCAAAGGAAATTAAGGAGAGTGTTTCAGACATTCTTT | 2302 |
| gb:MT106054 | Organism:Severe | GTCGGTGGACAAATTGTACCTGTGCAAAGGAAATTAAGGAGAGTGTTTCAGACATTCTTT | 2302 |
| gb:MT049951 | Organism:Severe | GTCGGTGGACAAATTGTACCTGTGCAAAGGAAATTAAGGAGAGTGTTTCAGACATTCTTT | 2302 |
| gb:MN975262 | Organism:Severe | GTCGGTGGACAAATTGTACCTGTGCAAAGGAAATTAAGGAGAGTGTTTCAGACATTCTTT | 2302 |
| gb:MT106052 | Organism:Severe | GTCGGTGGACAAATTGTACCTGTGCAAAGGAAATTAAGGAGAGTGTTTCAGACATTCTTT | 2302 |
| gb:LC522975 | Organism:Severe | GTCGGTGGACAAATTGTACCTGTGCAAAGGAAATTAAGGAGAGTGTTTCAGACATTCTTT | 2299 |
| gb:LC522973 | Organism:Severe | GTCGGTGGACAAATTGTACCTGTGCAAAGGAAATTAAGGAGAGTGTTTCAGACATTCTTT | 2299 |
| gb:LC522974 | Organism:Severe | GTCGGTGGACAAATTGTACCTGTGCAAAGGAAATTAAGGAGAGTGTTTCAGACATTCTTT | 2299 |
| gb:MN985325 | Organism:Severe | GTCGGTGGACAAATTGTACCTGTGCAAAGGAAATTAAGGAGAGTGTTTCAGACATTCTTT | 2302 |
| gb:MT020881 | Organism:Severe | GTCGGTGGACAAATTGTACCTGTGCAAAGGAAATTAAGGAGAGTGTTTCAGACATTCTTT | 2302 |
| gb:MT020880 | Organism:Severe | GTCGGTGGACAAATTGTACCTGTGCAAAGGAAATTAAGGAGAGTGTTTCAGACATTCTTT | 2302 |
| gb:MT066175 | Organism:Severe | GTCGGTGGACAAATTGTACCTGTGCAAAGGAAATTAAGGAGAGTGTTTCAGACATTCTTT | 2302 |
| gb:MN997409 | Organism:Severe | GTCGGTGGACAAATTGTACCTGTGCAAAGGAAATTAAGGAGAGTGTTTCAGACATTCTTT | 2302 |
| gb:MN938384 | Organism:Severe | GTCGGTGGACAAATTGTACCTGTGCAAAGGAAATTAAGGAGAGTGTTTCAGACATTCTTT | 2270 |
| gb:MT044258 | Organism:Severe | GTCGGTGGACAAATTGTACCTGTGCAAAGGAAATTAAGGAGAGTGTTTCAGACATTCTTT | 2278 |
| gb:MT039890 | Organism:Severe | GTCGGTGGACAAATTGTACCTGTGCAAAGGAAATTAAGGAGAGTGTTTCAGACATTCTTT | 2302 |
| gb:MN988713 | Organism:Severe | GTCGGTGGACAAATTGTACCTGTGCAAAGGAAATTAAGGAGAGTGTTTCAGACATTCTTT | 2302 |
| gb:LC521925 | Organism:Severe | GTCGGTGGACAAATTGTACCTGTGCAAAGGAAATTAAGGAGAGTGTTTCAGACATTCTTT | 2275 |
| gb:MT093571 | Organism:Severe | GTCGGTGGACAAATTGTACCTGTGCAAAGGAAATTAAGGAGAGTGTTTCAGACATTCTTT | 2302 |
| gb:MT039887 | Organism:Severe | GTCGGTGGACAAATTGTACCTGTGCAAAGGAAATTAAGGAGAGTGTTTCAGACATTCTTT | 2302 |
| gb:MT019530 | Organism:Severe | GTCGGTGGACAAATTGTACCTGTGCAAAGGAAATTAAGGAGAGTGTTTCAGACATTCTTT | 2302 |
| gb:MT039888 | Organism:Severe | GTCGGTGGACAAATTGTACCTGTGCAAAGGAAATTAAGGAGAGTGTTTCAGACATTCTTT | 2302 |
| gb:LC522972 | Organism:Severe | GTCGGTGGACAAATTGTACCTGTGCAAAGGAAATTAAGGAGAGTGTTTCAGACATTCTTT | 2299 |
| gb:MT027063 | Organism:Severe | GTCGGTGGACAAATTGTACCTGTGCAAAGGAAATTAAGGAGAGTGTTTCAGACATTCTTT | 2302 |
| gb:MT027062 | Organism:Severe | GTCGGTGGACAAATTGTACCTGTGCAAAGGAAATTAAGGAGAGTGTTTCAGACATTCTTT | 2302 |
| gb:MT019529 | Organism:Severe | GTCGGTGGACAAATTGTACCTGTGCAAAGGAAATTAAGGAGAGTGTTTCAGACATTCTTT | 2302 |
| gb:MN996529 | Organism:Severe | GTCGGTGGACAAATTGTACCTGTGCAAAGGAAATTAAGGAGAGTGTTTCAGACATTCTTT | 2290 |
| gb:MN996531 | Organism:Severe | GTCGGTGGACAAATTGTACCTGTGCAAAGGAAATTAAGGAGAGTGTTTCAGACATTCTTT | 2289 |
| gb:MT066176 | Organism:Severe | GTCGGTGGACAAATTGTACCTGTGCAAAGGAAATTAAGGAGAGTGTTTCAGACATTCTTT | 2302 |
| gb:MT027064 | Organism:Severe | GTCGGTGGACAAATTGTACCTGTGCAAAGGAAATTAAGGAGAGTGTTTCAGACATTCTTT | 2302 |
| gb:MN994468 | Organism:Severe | GTCGGTGGACAAATTGTACCTGTGCAAAGGAAATTAAGGAGAGTGTTTCAGACATTCTTT | 2302 |
| gb:MT072688 | Organism:Severe | GTCGGTGGACAAATTGTACCTGTGCAAAGGAAATTAAGGAGAGTGTTTCAGACATTCTTT | 2287 |
| gb:MN996527 | Organism:Severe | GTCGGTGGACAAATTGTACCTGTGCAAAGGAAATTAAGGAGAGTGTTTCAGACATTCTTT | 2269 |
| gb:MT093631 | Organism:Severe | GTCGGTGGACAAATTGTACCTGTGCAAAGGAAATTAAGGAGAGTGTTTCAGACATTCTTT | 2340 |
| gb:MT106053 | Organism:Severe | GTCGGTGGACAAATTGTACCTGTGCAAAGGAAATTAAGGAGAGTGTTTCAGACATTCTTT | 2302 |
| gb:MT019533 | Organism:Severe | GTCGGTGGACAAATTGTACCTGTGCAAAGGAAATTAAGGAGAGTGTTTCAGACATTCTTT | 2302 |
| gb:MT019531 | Organism:Severe | GTCGGTGGACAAATTGTACCTGTGCAAAGGAAATTAAGGAGAGTGTTTCAGACATTCTTT | 2302 |
| gb:MN996528 | Organism:Severe | GTCGGTGGACAAATTGTACCTGTGCAAAGGAAATTAAGGAGAGTGTTTCAGACATTCTTT | 2302 |
| gb:MN996530 | Organism:Severe | GTCGGTGGACAAATTGTACCTGTGCAAAGGAAATTAAGGAGAGTGTTTCAGACATTCTTT | 2288 |
| gb:MN908947 | Organism:Severe | GTCGGTGGACAAATTGTACCTGTGCAAAGGAAATTAAGGAGAGTGTTTCAGACATTCTTT | 2302 |
| gb:MT019532 | Organism:Severe | GTCGGTGGACAAATTGTACCTGTGCAAAGGAAATTAAGGAGAGTGTTTCAGACATTCTTT | 2302 |

\*\*\*\*\*

|             |                 |                                                             |      |
|-------------|-----------------|-------------------------------------------------------------|------|
| gb:MT020781 | Organism:Severe | AAGCTTGTAAATAAATTTTGGCTTTGTGTGCTGACTCTATCATTATTGGTGGAGCTAAA | 2350 |
| gb:MT007544 | Organism:Severe | AAGCTTGTAAATAAATTTTGGCTTTGTGTGCTGACTCTATCATTATTGGTGGAGCTAAA | 2362 |
| gb:MN994467 | Organism:Severe | AAGCTTGTAAATAAATTTTGGCTTTGTGTGCTGACTCTATCATTATTGGTGGAGCTAAA | 2362 |
| gb:MT044257 | Organism:Severe | AAGCTTGTAAATAAATTTTGGCTTTGTGTGCTGACTCTATCATTATTGGTGGAGCTAAA | 2362 |
| gb:MT106054 | Organism:Severe | AAGCTTGTAAATAAATTTTGGCTTTGTGTGCTGACTCTATCATTATTGGTGGAGCTAAA | 2362 |
| gb:MT049951 | Organism:Severe | AAGCTTGTAAATAAATTTTGGCTTTGTGTGCTGACTCTATCATTATTGGTGGAGCTAAA | 2362 |
| gb:MN975262 | Organism:Severe | AAGCTTGTAAATAAATTTTGGCTTTGTGTGCTGACTCTATCATTATTGGTGGAGCTAAA | 2362 |
| gb:MT106052 | Organism:Severe | AAGCTTGTAAATAAATTTTGGCTTTGTGTGCTGACTCTATCATTATTGGTGGAGCTAAA | 2362 |
| gb:LC522975 | Organism:Severe | AAGCTTGTAAATAAATTTTGGCTTTGTGTGCTGACTCTATCATTATTGGTGGAGCTAAA | 2359 |
| gb:LC522973 | Organism:Severe | AAGCTTGTAAATAAATTTTGGCTTTGTGTGCTGACTCTATCATTATTGGTGGAGCTAAA | 2359 |
| gb:LC522974 | Organism:Severe | AAGCTTGTAAATAAATTTTGGCTTTGTGTGCTGACTCTATCATTATTGGTGGAGCTAAA | 2359 |
| gb:MN985325 | Organism:Severe | AAGCTTGTAAATAAATTTTGGCTTTGTGTGCTGACTCTATCATTATTGGTGGAGCTAAA | 2362 |
| gb:MT020881 | Organism:Severe | AAGCTTGTAAATAAATTTTGGCTTTGTGTGCTGACTCTATCATTATTGGTGGAGCTAAA | 2362 |
| gb:MT020880 | Organism:Severe | AAGCTTGTAAATAAATTTTGGCTTTGTGTGCTGACTCTATCATTATTGGTGGAGCTAAA | 2362 |
| gb:MT066175 | Organism:Severe | AAGCTTGTAAATAAATTTTGGCTTTGTGTGCTGACTCTATCATTATTGGTGGAGCTAAA | 2362 |
| gb:MN997409 | Organism:Severe | AAGCTTGTAAATAAATTTTGGCTTTGTGTGCTGACTCTATCATTATTGGTGGAGCTAAA | 2362 |
| gb:MN938384 | Organism:Severe | AAGCTTGTAAATAAATTTTGGCTTTGTGTGCTGACTCTATCATTATTGGTGGAGCTAAA | 2330 |
| gb:MT044258 | Organism:Severe | AAGCTTGTAAATAAATTTTGGCTTTGTGTGCTGACTCTATCATTATTGGTGGAGCTAAA | 2338 |
| gb:MT039890 | Organism:Severe | AAGCTTGTAAATAAATTTTGGCTTTGTGTGCTGACTCTATCATTATTGGTGGAGCTAAA | 2362 |
| gb:MN988713 | Organism:Severe | AAGCTTGTAAATAAATTTTGGCTTTGTGTGCTGACTCTATCATTATTGGTGGAGCTAAA | 2362 |
| gb:LC521925 | Organism:Severe | AAGCTTGTAAATAAATTTTGGCTTTGTGTGCTGACTCTATCATTATTGGTGGAGCTAAA | 2335 |
| gb:MT093571 | Organism:Severe | AAGCTTGTAAATAAATTTTGGCTTTGTGTGCTGACTCTATCATTATTGGTGGAGCTAAA | 2362 |



|             |                  |                                                                       |      |
|-------------|------------------|-----------------------------------------------------------------------|------|
| gb:MN996530 | Organism: Severe | CTTAAAGCCTTGAATTTAGGTGAAACATTTGTCACGCACTCAAAGGGATTGTACAGAAAG          | 2408 |
| gb:MN908947 | Organism: Severe | CTTAAAGCCTTGAATTTAGGTGAAACATTTGTCACGCACTCAAAGGGATTGTACAGAAAG          | 2422 |
| gb:MT019532 | Organism: Severe | CTTAAAGCCTTGAATTTAGGTGAAACATTTGTCACGCACTCAAAGGGATTGTACAGAAAG<br>***** | 2422 |
| gb:MT020781 | Organism: Severe | TGTGTTAAATCCAGAGAAGAACTGGCCTACTCATGCCTCTAAAAGCCCCAAAAGAAATT           | 2470 |
| gb:MT007544 | Organism: Severe | TGTGTTAAATCCAGAGAAGAACTGGCCTACTCATGCCTCTAAAAGCCCCAAAAGAAATT           | 2482 |
| gb:MN994467 | Organism: Severe | TGTGTTAAATCCAGAGAAGAACTGGCCTACTCATGCCTCTAAAAGCCCCAAAAGAAATT           | 2482 |
| gb:MT044257 | Organism: Severe | TGTGTTAAATCCAGAGAAGAACTGGCCTACTCATGCCTCTAAAAGCCCCAAAAGAAATT           | 2482 |
| gb:MT106054 | Organism: Severe | TGTGTTAAATCCAGAGAAGAACTGGCCTACTCATGCCTCTAAAAGCCCCAAAAGAAATT           | 2482 |
| gb:MT049951 | Organism: Severe | TGTGTTAAATCCAGAGAAGAACTGGCCTACTCATGCCTCTAAAAGCCCCAAAAGAAATT           | 2482 |
| gb:MN975262 | Organism: Severe | TGTGTTAAATCCAGAGAAGAACTGGCCTACTCATGCCTCTAAAAGCCCCAAAAGAAATT           | 2482 |
| gb:MT106052 | Organism: Severe | TGTGTTAAATCCAGAGAAGAACTGGCCTACTCATGCCTCTAAAAGCCCCAAAAGAAATT           | 2482 |
| gb:LC522975 | Organism: Severe | TGTGTTAAATCCAGAGAAGAACTGGCCTACTCATGCCTCTAAAAGCCCCAAAAGAAATT           | 2479 |
| gb:LC522973 | Organism: Severe | TGTGTTAAATCCAGAGAAGAACTGGCCTACTCATGCCTCTAAAAGCCCCAAAAGAAATT           | 2479 |
| gb:LC522974 | Organism: Severe | TGTGTTAAATCCAGAGAAGAACTGGCCTACTCATGCCTCTAAAAGCCCCAAAAGAAATT           | 2479 |
| gb:MN985325 | Organism: Severe | TGTGTTAAATCCAGAGAAGAACTGGCCTACTCATGCCTCTAAAAGCCCCAAAAGAAATT           | 2482 |
| gb:MT020881 | Organism: Severe | TGTGTTAAATCCAGAGAAGAACTGGCCTACTCATGCCTCTAAAAGCCCCAAAAGAAATT           | 2482 |
| gb:MT020880 | Organism: Severe | TGTGTTAAATCCAGAGAAGAACTGGCCTACTCATGCCTCTAAAAGCCCCAAAAGAAATT           | 2482 |
| gb:MT066175 | Organism: Severe | TGTGTTAAATCCAGAGAAGAACTGGCCTACTCATGCCTCTAAAAGCCCCAAAAGAAATT           | 2482 |
| gb:MN997409 | Organism: Severe | TGTGTTAAATCCAGAGAAGAACTGGCCTACTCATGCCTCTAAAAGCCCCAAAAGAAATT           | 2482 |
| gb:MN938384 | Organism: Severe | TGTGTTAAATCCAGAGAAGAACTGGCCTACTCATGCCTCTAAAAGCCCCAAAAGAAATT           | 2450 |
| gb:MT044258 | Organism: Severe | TGTGTTAAATCCAGAGAAGAACTGGCCTACTCATGCCTCTAAAAGCCCCAAAAGAAATT           | 2458 |
| gb:MT039890 | Organism: Severe | TGTGTTAAATCCAGAGAAGAACTGGCCTACTCATGCCTCTAAAAGCCCCAAAAGAAATT           | 2482 |
| gb:MN988713 | Organism: Severe | TGTGTTAAATCCAGAGAAGAACTGGCCTACTCATGCCTCTAAAAGCCCCAAAAGAAATT           | 2482 |
| gb:LC521925 | Organism: Severe | TGTGTTAAATCCAGAGAAGAACTGGCCTACTCATGCCTCTAAAAGCCCCAAAAGAAATT           | 2455 |
| gb:MT093571 | Organism: Severe | TGTGTTAAATCCAGAGAAGAACTGGCCTACTCATGCCTCTAAAAGCCCCAAAAGAAATT           | 2482 |
| gb:MT039887 | Organism: Severe | TGTGTTAAATCCAGAGAAGAACTGGCCTACTCATGCCTCTAAAAGCCCCAAAAGAAATT           | 2482 |
| gb:MT019530 | Organism: Severe | TGTGTTAAATCCAGAGAAGAACTGGCCTACTCATGCCTCTAAAAGCCCCAAAAGAAATT           | 2482 |
| gb:MT039888 | Organism: Severe | TGTGTTAAATCCAGAGAAGAACTGGCCTACTCATGCCTCTAAAAGCCCCAAAAGAAATT           | 2482 |
| gb:LC522972 | Organism: Severe | TGTGTTAAATCCAGAGAAGAACTGGCCTACTCATGCCTCTAAAAGCCCCAAAAGAAATT           | 2479 |
| gb:MT027063 | Organism: Severe | TGTGTTAAATCCAGAGAAGAACTGGCCTACTCATGCCTCTAAAAGCCCCAAAAGAAATT           | 2482 |
| gb:MT027062 | Organism: Severe | TGTGTTAAATCCAGAGAAGAACTGGCCTACTCATGCCTCTAAAAGCCCCAAAAGAAATT           | 2482 |
| gb:MT019529 | Organism: Severe | TGTGTTAAATCCAGAGAAGAACTGGCCTACTCATGCCTCTAAAAGCCCCAAAAGAAATT           | 2482 |
| gb:MN996529 | Organism: Severe | TGTGTTAAATCCAGAGAAGAACTGGCCTACTCATGCCTCTAAAAGCCCCAAAAGAAATT           | 2470 |
| gb:MN996531 | Organism: Severe | TGTGTTAAATCCAGAGAAGAACTGGCCTACTCATGCCTCTAAAAGCCCCAAAAGAAATT           | 2469 |
| gb:MT066176 | Organism: Severe | TGTGTTAAATCCAGAGAAGAACTGGCCTACTCATGCCTCTAAAAGCCCCAAAAGAAATT           | 2482 |
| gb:MT027064 | Organism: Severe | TGTGTTAAATCCAGAGAAGAACTGGCCTACTCATGCCTCTAAAAGCCCCAAAAGAAATT           | 2482 |
| gb:MN994468 | Organism: Severe | TGTGTTAAATCCAGAGAAGAACTGGCCTACTCATGCCTCTAAAAGCCCCAAAAGAAATT           | 2482 |
| gb:MT072688 | Organism: Severe | TGTGTTAAATCCAGAGAAGAACTGGCCTACTCATGCCTCTAAAAGCCCCAAAAGAAATT           | 2467 |
| gb:MN996527 | Organism: Severe | TGTGTTAAATCCAGAGAAGAACTGGCCTACTCATGCCTCTAAAAGCCCCAAAAGAAATT           | 2449 |
| gb:MT093631 | Organism: Severe | TGTGTTAAATCCAGAGAAGAACTGGCCTACTCATGCCTCTAAAAGCCCCAAAAGAAATT           | 2520 |
| gb:MT106053 | Organism: Severe | TGTGTTAAATCCAGAGAAGAACTGGCCTACTCATGCCTCTAAAAGCCCCAAAAGAAATT           | 2482 |
| gb:MT019533 | Organism: Severe | TGTGTTAAATCCAGAGAAGAACTGGCCTACTCATGCCTCTAAAAGCCCCAAAAGAAATT           | 2482 |
| gb:MT019531 | Organism: Severe | TGTGTTAAATCCAGAGAAGAACTGGCCTACTCATGCCTCTAAAAGCCCCAAAAGAAATT           | 2482 |
| gb:MN996528 | Organism: Severe | TGTGTTAAATCCAGAGAAGAACTGGCCTACTCATGCCTCTAAAAGCCCCAAAAGAAATT           | 2482 |
| gb:MN996530 | Organism: Severe | TGTGTTAAATCCAGAGAAGAACTGGCCTACTCATGCCTCTAAAAGCCCCAAAAGAAATT           | 2468 |
| gb:MN908947 | Organism: Severe | TGTGTTAAATCCAGAGAAGAACTGGCCTACTCATGCCTCTAAAAGCCCCAAAAGAAATT           | 2482 |
| gb:MT019532 | Organism: Severe | TGTGTTAAATCCAGAGAAGAACTGGCCTACTCATGCCTCTAAAAGCCCCAAAAGAAATT<br>*****  | 2482 |

|             |                  |                                                             |      |
|-------------|------------------|-------------------------------------------------------------|------|
| gb:MT020781 | Organism: Severe | ATCTTCTTAGAGGGAGAAACACTTCCACAGAAGTGTAAACAGAGGAAGTTGTCTTGAAA | 2530 |
| gb:MT007544 | Organism: Severe | ATCTTCTTAGAGGGAGAAACACTTCCACAGAAGTGTAAACAGAGGAAGTTGTCTTGAAA | 2542 |
| gb:MN994467 | Organism: Severe | ATCTTCTTAGAGGGAGAAACACTTCCACAGAAGTGTAAACAGAGGAAGTTGTCTTGAAA | 2542 |
| gb:MT044257 | Organism: Severe | ATCTTCTTAGAGGGAGAAACACTTCCACAGAAGTGTAAACAGAGGAAGTTGTCTTGAAA | 2542 |
| gb:MT106054 | Organism: Severe | ATCTTCTTAGAGGGAGAAACACTTCCACAGAAGTGTAAACAGAGGAAGTTGTCTTGAAA | 2542 |
| gb:MT049951 | Organism: Severe | ATCTTCTTAGAGGGAGAAACACTTCCACAGAAGTGTAAACAGAGGAAGTTGTCTTGAAA | 2542 |
| gb:MN975262 | Organism: Severe | ATCTTCTTAGAGGGAGAAACACTTCCACAGAAGTGTAAACAGAGGAAGTTGTCTTGAAA | 2542 |
| gb:MT106052 | Organism: Severe | ATCTTCTTAGAGGGAGAAACACTTCCACAGAAGTGTAAACAGAGGAAGTTGTCTTGAAA | 2542 |
| gb:LC522975 | Organism: Severe | ATCTTCTTAGAGGGAGAAACACTTCCACAGAAGTGTAAACAGAGGAAGTTGTCTTGAAA | 2539 |
| gb:LC522973 | Organism: Severe | ATCTTCTTAGAGGGAGAAACACTTCCACAGAAGTGTAAACAGAGGAAGTTGTCTTGAAA | 2539 |
| gb:LC522974 | Organism: Severe | ATCTTCTTAGAGGGAGAAACACTTCCACAGAAGTGTAAACAGAGGAAGTTGTCTTGAAA | 2539 |
| gb:MN985325 | Organism: Severe | ATCTTCTTAGAGGGAGAAACACTTCCACAGAAGTGTAAACAGAGGAAGTTGTCTTGAAA | 2542 |
| gb:MT020881 | Organism: Severe | ATCTTCTTAGAGGGAGAAACACTTCCACAGAAGTGTAAACAGAGGAAGTTGTCTTGAAA | 2542 |
| gb:MT020880 | Organism: Severe | ATCTTCTTAGAGGGAGAAACACTTCCACAGAAGTGTAAACAGAGGAAGTTGTCTTGAAA | 2542 |

|             |                 |                                                                        |      |
|-------------|-----------------|------------------------------------------------------------------------|------|
| gb:MT066175 | Organism:Severe | ATCTTCTTAGAGGGAGAAAACACTTCCCACAGAAGTGTAAACAGAGGAAGTTGTCTTGAAA          | 2542 |
| gb:MN997409 | Organism:Severe | ATCTTCTTAGAGGGAGAAAACACTTCCCACAGAAGTGTAAACAGAGGAAGTTGTCTTGAAA          | 2542 |
| gb:MN938384 | Organism:Severe | ATCTTCTTAGAGGGAGAAAACACTTCCCACAGAAGTGTAAACAGAGGAAGTTGTCTTGAAA          | 2510 |
| gb:MT044258 | Organism:Severe | ATCTTCTTAGAGGGAGAAAACACTTCCCACAGAAGTGTAAACAGAGGAAGTTGTCTTGAAA          | 2518 |
| gb:MT039890 | Organism:Severe | ATCTTCTTAGAGGGAGAAAACACTTCCCACAGAAGTGTAAACAGAGGAAGTTGTCTTGAAA          | 2542 |
| gb:MN988713 | Organism:Severe | ATCTTCTTAGAGGGAGAAAACACTTCCCACAGAAGTGTAAACAGAGGAAGTTGTCTTGAAA          | 2542 |
| gb:LC521925 | Organism:Severe | ATCTTCTTAGAGGGAGAAAACACTTCCCACAGAAGTGTAAACAGAGGAAGTTGTCTTGAAA          | 2515 |
| gb:MT093571 | Organism:Severe | ATCTTCTTAGAGGGAGAAAACACTTCCCACAGAAGTGTAAACAGAGGAAGTTGTCTTGAAA          | 2542 |
| gb:MT039887 | Organism:Severe | ATCTTCTTAGAGGGAGAAAACACTTCCCACAGAAGTGTAAACAGAGGAAGTTGTCTTGAAA          | 2542 |
| gb:MT019530 | Organism:Severe | ATCTTCTTAGAGGGAGAAAACACTTCCCACAGAAGTGTAAACAGAGGAAGTTGTCTTGAAA          | 2542 |
| gb:MT039888 | Organism:Severe | ATCTTCTTAGAGGGAGAAAACACTTCCCACAGAAGTGTAAACAGAGGAAGTTGTCTTGAAA          | 2542 |
| gb:LC522972 | Organism:Severe | ATCTTCTTAGAGGGAGAAAACACTTCCCACAGAAGTGTAAACAGAGGAAGTTGTCTTGAAA          | 2539 |
| gb:MT027063 | Organism:Severe | ATCTTCTTAGAGGGAGAAAACACTTCCCACAGAAGTGTAAACAGAGGAAGTTGTCTTGAAA          | 2542 |
| gb:MT027062 | Organism:Severe | ATCTTCTTAGAGGGAGAAAACACTTCCCACAGAAGTGTAAACAGAGGAAGTTGTCTTGAAA          | 2542 |
| gb:MT019529 | Organism:Severe | ATCTTCTTAGAGGGAGAAAACACTTCCCACAGAAGTGTAAACAGAGGAAGTTGTCTTGAAA          | 2542 |
| gb:MN996529 | Organism:Severe | ATCTTCTTAGAGGGAGAAAACACTTCCCACAGAAGTGTAAACAGAGGAAGTTGTCTTGAAA          | 2530 |
| gb:MN996531 | Organism:Severe | ATCTTCTTAGAGGGAGAAAACACTTCCCACAGAAGTGTAAACAGAGGAAGTTGTCTTGAAA          | 2529 |
| gb:MT066176 | Organism:Severe | ATCTTCTTAGAGGGAGAAAACACTTCCCACAGAAGTGTAAACAGAGGAAGTTGTCTTGAAA          | 2542 |
| gb:MT027064 | Organism:Severe | ATCTTCTTAGAGGGAGAAAACACTTCCCACAGAAGTGTAAACAGAGGAAGTTGTCTTGAAA          | 2542 |
| gb:MN994468 | Organism:Severe | ATCTTCTTAGAGGGAGAAAACACTTCCCACAGAAGTGTAAACAGAGGAAGTTGTCTTGAAA          | 2542 |
| gb:MT072688 | Organism:Severe | ATCTTCTTAGAGGGAGAAAACACTTCCCACAGAAGTGTAAACAGAGGAAGTTGTCTTGAAA          | 2527 |
| gb:MN996527 | Organism:Severe | ATCTTCTTAGAGGGAGAAAACACTTCCCACAGAAGTGTAAACAGAGGAAGTTGTCTTGAAA          | 2509 |
| gb:MT093631 | Organism:Severe | ATCTTCTTAGAGGGAGAAAACACTTCCCACAGAAGTGTAAACAGAGGAAGTTGTCTTGAAA          | 2580 |
| gb:MT106053 | Organism:Severe | ATCTTCTTAGAGGGAGAAAACACTTCCCACAGAAGTGTAAACAGAGGAAGTTGTCTTGAAA          | 2542 |
| gb:MT019533 | Organism:Severe | ATCTTCTTAGAGGGAGAAAACACTTCCCACAGAAGTGTAAACAGAGGAAGTTGTCTTGAAA          | 2542 |
| gb:MT019531 | Organism:Severe | ATCTTCTTAGAGGGAGAAAACACTTCCCACAGAAGTGTAAACAGAGGAAGTTGTCTTGAAA          | 2542 |
| gb:MN996528 | Organism:Severe | ATCTTCTTAGAGGGAGAAAACACTTCCCACAGAAGTGTAAACAGAGGAAGTTGTCTTGAAA          | 2542 |
| gb:MN996530 | Organism:Severe | ATCTTCTTAGAGGGAGAAAACACTTCCCACAGAAGTGTAAACAGAGGAAGTTGTCTTGAAA          | 2528 |
| gb:MN908947 | Organism:Severe | ATCTTCTTAGAGGGAGAAAACACTTCCCACAGAAGTGTAAACAGAGGAAGTTGTCTTGAAA          | 2542 |
| gb:MT019532 | Organism:Severe | ATCTTCTTAGAGGGAGAAAACACTTCCCACAGAAGTGTAAACAGAGGAAGTTGTCTTGAAA<br>***** | 2542 |

|             |                 |                                                              |      |
|-------------|-----------------|--------------------------------------------------------------|------|
| gb:MT020781 | Organism:Severe | ACTGGTGATTTACAACCATTAGAACAACCTACTAGTGAAGCTGTTGAAGCTCCATTGGTT | 2590 |
| gb:MT007544 | Organism:Severe | ACTGGTGATTTACAACCATTAGAACAACCTACTAGTGAAGCTGTTGAAGCTCCATTGGTT | 2602 |
| gb:MN994467 | Organism:Severe | ACTGGTGATTTACAACCATTAGAACAACCTACTAGTGAAGCTGTTGAAGCTCCATTGGTT | 2602 |
| gb:MT044257 | Organism:Severe | ACTGGTGATTTACAACCATTAGAACAACCTACTAGTGAAGCTGTTGAAGCTCCATTGGTT | 2602 |
| gb:MT106054 | Organism:Severe | ACTGGTGATTTACAACCATTAGAACAACCTACTAGTGAAGCTGTTGAAGCTCCATTGGTT | 2602 |
| gb:MT049951 | Organism:Severe | ACTGGTGATTTACAACCATTAGAACAACCTACTAGTGAAGCTGTTGAAGCTCCATTGGTT | 2602 |
| gb:MN975262 | Organism:Severe | ACTGGTGATTTACAACCATTAGAACAACCTACTAGTGAAGCTGTTGAAGCTCCATTGGTT | 2602 |
| gb:MT106052 | Organism:Severe | ACTGGTGATTTACAACCATTAGAACAACCTACTAGTGAAGCTGTTGAAGCTCCATTGGTT | 2602 |
| gb:LC522975 | Organism:Severe | ACTGGTGATTTACAACCATTAGAACAACCTACTAGTGAAGCTGTTGAAGCTCCATTGGTT | 2599 |
| gb:LC522973 | Organism:Severe | ACTGGTGATTTACAACCATTAGAACAACCTACTAGTGAAGCTGTTGAAGCTCCATTGGTT | 2599 |
| gb:LC522974 | Organism:Severe | ACTGGTGATTTACAACCATTAGAACAACCTACTAGTGAAGCTGTTGAAGCTCCATTGGTT | 2599 |
| gb:MN985325 | Organism:Severe | ACTGGTGATTTACAACCATTAGAACAACCTACTAGTGAAGCTGTTGAAGCTCCATTGGTT | 2602 |
| gb:MT020881 | Organism:Severe | ACTGGTGATTTACAACCATTAGAACAACCTACTAGTGAAGCTGTTGAAGCTCCATTGGTT | 2602 |
| gb:MT020880 | Organism:Severe | ACTGGTGATTTACAACCATTAGAACAACCTACTAGTGAAGCTGTTGAAGCTCCATTGGTT | 2602 |
| gb:MT066175 | Organism:Severe | ACTGGTGATTTACAACCATTAGAACAACCTACTAGTGAAGCTGTTGAAGCTCCATTGGTT | 2602 |
| gb:MN997409 | Organism:Severe | ACTGGTGATTTACAACCATTAGAACAACCTACTAGTGAAGCTGTTGAAGCTCCATTGGTT | 2602 |
| gb:MN938384 | Organism:Severe | ACTGGTGATTTACAACCATTAGAACAACCTACTAGTGAAGCTGTTGAAGCTCCATTGGTT | 2570 |
| gb:MT044258 | Organism:Severe | ACTGGTGATTTACAACCATTAGAACAACCTACTAGTGAAGCTGTTGAAGCTCCATTGGTT | 2578 |
| gb:MT039890 | Organism:Severe | ACTGGTGATTTACAACCATTAGAACAACCTACTAGTGAAGCTGTTGAAGCTCCATTGGTT | 2602 |
| gb:MN988713 | Organism:Severe | ACTGGTGATTTACAACCATTAGAACAACCTACTAGTGAAGCTGTTGAAGCTCCATTGGTT | 2602 |
| gb:LC521925 | Organism:Severe | ACTGGTGATTTACAACCATTAGAACAACCTACTAGTGAAGCTGTTGAAGCTCCATTGGTT | 2575 |
| gb:MT093571 | Organism:Severe | ACTGGTGATTTACAACCATTAGAACAACCTACTAGTGAAGCTGTTGAAGCTCCATTGGTT | 2602 |
| gb:MT039887 | Organism:Severe | ACTGGTGATTTACAACCATTAGAACAACCTACTAGTGAAGCTGTTGAAGCTCCATTGGTT | 2602 |
| gb:MT019530 | Organism:Severe | ACTGGTGATTTACAACCATTAGAACAACCTACTAGTGAAGCTGTTGAAGCTCCATTGGTT | 2602 |
| gb:MT039888 | Organism:Severe | ACTGGTGATTTACAACCATTAGAACAACCTACTAGTGAAGCTGTTGAAGCTCCATTGGTT | 2602 |
| gb:LC522972 | Organism:Severe | ACTGGTGATTTACAACCATTAGAACAACCTACTAGTGAAGCTGTTGAAGCTCCATTGGTT | 2599 |
| gb:MT027063 | Organism:Severe | ACTGGTGATTTACAACCATTAGAACAACCTACTAGTGAAGCTGTTGAAGCTCCATTGGTT | 2602 |
| gb:MT027062 | Organism:Severe | ACTGGTGATTTACAACCATTAGAACAACCTACTAGTGAAGCTGTTGAAGCTCCATTGGTT | 2602 |
| gb:MT019529 | Organism:Severe | ACTGGTGATTTACAACCATTAGAACAACCTACTAGTGAAGCTGTTGAAGCTCCATTGGTT | 2602 |
| gb:MN996529 | Organism:Severe | ACTGGTGATTTACAACCATTAGAACAACCTACTAGTGAAGCTGTTGAAGCTCCATTGGTT | 2590 |
| gb:MN996531 | Organism:Severe | ACTGGTGATTTACAACCATTAGAACAACCTACTAGTGAAGCTGTTGAAGCTCCATTGGTT | 2589 |
| gb:MT066176 | Organism:Severe | ACTGGTGATTTACAACCATTAGAACAACCTACTAGTGAAGCTGTTGAAGCTCCATTGGTT | 2602 |
| gb:MT027064 | Organism:Severe | ACTGGTGATTTACAACCATTAGAACAACCTACTAGTGAAGCTGTTGAAGCTCCATTGGTT | 2602 |



|             |                 |                                                              |      |
|-------------|-----------------|--------------------------------------------------------------|------|
| gb:MN994468 | Organism:Severe | ACTGGTGATTTACAACCATTAGAACAACCTACTAGTGAAGCTGTTGAAGCTCCATTGGTT | 2602 |
| gb:MT072688 | Organism:Severe | ACTGGTGATTTACAACCATTAGAACAACCTACTAGTGAAGCTGTTGAAGCTCCATTGGTT | 2587 |
| gb:MN996527 | Organism:Severe | ACTGGTGATTTACAACCATTAGAACAACCTACTAGTGAAGCTGTTGAAGCTCCATTGGTT | 2569 |
| gb:MT093631 | Organism:Severe | ACTGGTGATTTACAACCATTAGAACAACCTACTAGTGAAGCTGTTGAAGCTCCATTGGTT | 2640 |
| gb:MT106053 | Organism:Severe | ACTGGTGATTTACAACCATTAGAACAACCTACTAGTGAAGCTGTTGAAGCTCCATTGGTT | 2602 |
| gb:MT019533 | Organism:Severe | ACTGGTGATTTACAACCATTAGAACAACCTACTAGTGAAGCTGTTGAAGCTCCATTGGTT | 2602 |
| gb:MT019531 | Organism:Severe | ACTGGTGATTTACAACCATTAGAACAACCTACTAGTGAAGCTGTTGAAGCTCCATTGGTT | 2602 |
| gb:MN996528 | Organism:Severe | ACTGGTGATTTACAACCATTAGAACAACCTACTAGTGAAGCTGTTGAAGCTCCATTGGTT | 2602 |
| gb:MN996530 | Organism:Severe | ACTGGTGATTTACAACCATTAGAACAACCTACTAGTGAAGCTGTTGAAGCTCCATTGGTT | 2588 |
| gb:MN908947 | Organism:Severe | ACTGGTGATTTACAACCATTAGAACAACCTACTAGTGAAGCTGTTGAAGCTCCATTGGTT | 2602 |
| gb:MT019532 | Organism:Severe | ACTGGTGATTTACAACCATTAGAACAACCTACTAGTGAAGCTGTTGAAGCTCCATTGGTT | 2602 |

\*\*\*\*\*

|             |                 |                                                              |      |
|-------------|-----------------|--------------------------------------------------------------|------|
| gb:MT020781 | Organism:Severe | GGTACACCAGTTTGTATTAACGGGCTTATGTTGCTCGAAATCAAAGACACAGAAAAGTAC | 2650 |
| gb:MT007544 | Organism:Severe | GGTACACCAGTTTGTATTAACGGGCTTATGTTGCTCGAAATCAAAGACACAGAAAAGTAC | 2662 |
| gb:MN994467 | Organism:Severe | GGTACACCAGTTTGTATTAACGGGCTTATGTTGCTCGAAATCAAAGACACAGAAAAGTAC | 2662 |
| gb:MT044257 | Organism:Severe | GGTACACCAGTTTGTATTAACGGGCTTATGTTGCTCGAAATCAAAGACACAGAAAAGTAC | 2662 |
| gb:MT106054 | Organism:Severe | GGTACACCAGTTTGTATTAACGGGCTTATGTTGCTCGAAATCAAAGACACAGAAAAGTAC | 2662 |
| gb:MT049951 | Organism:Severe | GGTACACCAGTTTGTATTAACGGGCTTATGTTGCTCGAAATCAAAGACACAGAAAAGTAC | 2662 |
| gb:MN975262 | Organism:Severe | GGTACACCAGTTTGTATTAACGGGCTTATGTTGCTCGAAATCAAAGACACAGAAAAGTAC | 2662 |
| gb:MT106052 | Organism:Severe | GGTACACCAGTTTGTATTAACGGGCTTATGTTGCTCGAAATCAAAGACACAGAAAAGTAC | 2662 |
| gb:LC522975 | Organism:Severe | GGTACACCAGTTTGTATTAACGGGCTTATGTTGCTCGAAATCAAAGACACAGAAAAGTAT | 2659 |
| gb:LC522973 | Organism:Severe | GGTACACCAGTTTGTATTAACGGGCTTATGTTGCTCGAAATCAAAGACACAGAAAAGTAT | 2659 |
| gb:LC522974 | Organism:Severe | GGTACACCAGTTTGTATTAACGGGCTTATGTTGCTCGAAATCAAAGACACAGAAAAGTAT | 2659 |
| gb:MN985325 | Organism:Severe | GGTACACCAGTTTGTATTAACGGGCTTATGTTGCTCGAAATCAAAGACACAGAAAAGTAC | 2662 |
| gb:MT020881 | Organism:Severe | GGTACACCAGTTTGTATTAACGGGCTTATGTTGCTCGAAATCAAAGACACAGAAAAGTAC | 2662 |
| gb:MT020880 | Organism:Severe | GGTACACCAGTTTGTATTAACGGGCTTATGTTGCTCGAAATCAAAGACACAGAAAAGTAC | 2662 |
| gb:MT066175 | Organism:Severe | GGTACACCAGTTTGTATTAACGGGCTTATGTTGCTCGAAATCAAAGACACAGAAAAGTAC | 2662 |
| gb:MN997409 | Organism:Severe | GGTACACCAGTTTGTATTAACGGGCTTATGTTGCTCGAAATCAAAGACACAGAAAAGTAC | 2662 |
| gb:MN938384 | Organism:Severe | GGTACACCAGTTTGTATTAACGGGCTTATGTTGCTCGAAATCAAAGACACAGAAAAGTAC | 2630 |
| gb:MT044258 | Organism:Severe | GGTACACCAGTTTGTATTAACGGGCTTATGTTGCTCGAAATCAAAGACACAGAAAAGTAC | 2638 |
| gb:MT039890 | Organism:Severe | GGTACACCAGTTTGTATTAACGGGCTTATGTTGCTCGAAATCAAAGACACAGAAAAGTAC | 2662 |
| gb:MN988713 | Organism:Severe | GGTACACCAGTTTGTATTAACGGGCTTATGTTGCTCGAAATCAAAGACACAGAAAAGTAC | 2662 |
| gb:LC521925 | Organism:Severe | GGTACACCAGTTTGTATTAACGGGCTTATGTTGCTCGAAATCAAAGACACAGAAAAGTAC | 2635 |
| gb:MT093571 | Organism:Severe | GGTACACCAGTTTGTATTAACGGGCTTATGTTGCTCGAAATCAAAGACACAGAAAAGTAC | 2662 |
| gb:MT039887 | Organism:Severe | GGTACACCAGTTTGTATTAACGGGCTTATGTTGCTCGAAATCAAAGACACAGAAAAGTAC | 2662 |
| gb:MT019530 | Organism:Severe | GGTACACCAGTTTGTATTAACGGGCTTATGTTGCTCGAAATCAAAGACACAGAAAAGTAC | 2662 |
| gb:MT039888 | Organism:Severe | GGTACACCAGTTTGTATTAACGGGCTTATGTTGCTCGAAATCAAAGACACAGAAAAGTAC | 2662 |
| gb:LC522972 | Organism:Severe | GGTACACCAGTTTGTATTAACGGGCTTATGTTGCTCGAAATCAAAGACACAGAAAAGTAC | 2659 |
| gb:MT027063 | Organism:Severe | GGTACACCAGTTTGTATTAACGGGCTTATGTTGCTCGAAATCAAAGACACAGAAAAGTAC | 2662 |
| gb:MT027062 | Organism:Severe | GGTACACCAGTTTGTATTAACGGGCTTATGTTGCTCGAAATCAAAGACACAGAAAAGTAC | 2662 |
| gb:MT019529 | Organism:Severe | GGTACACCAGTTTGTATTAACGGGCTTATGTTGCTCGAAATCAAAGACACAGAAAAGTAC | 2662 |
| gb:MN996529 | Organism:Severe | GGTACACCAGTTTGTATTAACGGGCTTATGTTGCTCGAAATCAAAGACACAGAAAAGTAC | 2650 |
| gb:MN996531 | Organism:Severe | GGTACACCAGTTTGTATTAACGGGCTTATGTTGCTCGAAATCAAAGACACAGAAAAGTAC | 2649 |
| gb:MT066176 | Organism:Severe | GGTACACCAGTTTGTATTAACGGGCTTATGTTGCTCGAAATCAAAGACACAGAAAAGTAC | 2662 |
| gb:MT027064 | Organism:Severe | GGTACACCAGTTTGTATTAACGGGCTTATGTTGCTCGAAATCAAAGACACAGAAAAGTAC | 2662 |
| gb:MN994468 | Organism:Severe | GGTACACCAGTTTGTATTAACGGGCTTATGTTGCTCGAAATCAAAGACACAGAAAAGTAC | 2662 |
| gb:MT072688 | Organism:Severe | GGTACACCAGTTTGTATTAACGGGCTTATGTTGCTCGAAATCAAAGACACAGAAAAGTAC | 2647 |
| gb:MN996527 | Organism:Severe | GGTACACCAGTTTGTATTAACGGGCTTATGTTGCTCGAAATCAAAGACACAGAAAAGTAC | 2629 |
| gb:MT093631 | Organism:Severe | GGTACACCAGTTTGTATTAACGGGCTTATGTTGCTCGAAATCAAAGACACAGAAAAGTAC | 2700 |
| gb:MT106053 | Organism:Severe | GGTACACCAGTTTGTATTAACGGGCTTATGTTGCTCGAAATCAAAGACACAGAAAAGTAC | 2662 |
| gb:MT019533 | Organism:Severe | GGTACACCAGTTTGTATTAACGGGCTTATGTTGCTCGAAATCAAAGACACAGAAAAGTAC | 2662 |
| gb:MT019531 | Organism:Severe | GGTACACCAGTTTGTATTAACGGGCTTATGTTGCTCGAAATCAAAGACACAGAAAAGTAC | 2662 |
| gb:MN996528 | Organism:Severe | GGTACACCAGTTTGTATTAACGGGCTTATGTTGCTCGAAATCAAAGACACAGAAAAGTAC | 2662 |
| gb:MN996530 | Organism:Severe | GGTACACCAGTTTGTATTAACGGGCTTATGTTGCTCGAAATCAAAGACACAGAAAAGTAC | 2648 |
| gb:MN908947 | Organism:Severe | GGTACACCAGTTTGTATTAACGGGCTTATGTTGCTCGAAATCAAAGACACAGAAAAGTAC | 2662 |
| gb:MT019532 | Organism:Severe | GGTACACCAGTTTGTATTAACGGGCTTATGTTGCTCGAAATCAAAGACACAGAAAAGTAC | 2662 |

\*\*\*\*\*

|             |                 |                                                             |      |
|-------------|-----------------|-------------------------------------------------------------|------|
| gb:MT020781 | Organism:Severe | TGTGCCCTTGACCTAATATGATGGTAACAAACAATACCTTCACACTCAAAGGCGGTGCA | 2710 |
| gb:MT007544 | Organism:Severe | TGTGCCCTTGACCTAATATGATGGTAACAAACAATACCTTCACACTCAAAGGCGGTGCA | 2722 |
| gb:MN994467 | Organism:Severe | TGTGCCCTTGACCTAATATGATGGTAACAAACAATACCTTCACACTCAAAGGCGGTGCA | 2722 |
| gb:MT044257 | Organism:Severe | TGTGCCCTTGACCTAATATGATGGTAACAAACAATACCTTCACACTCAAAGGCGGTGCA | 2722 |
| gb:MT106054 | Organism:Severe | TGTGCCCTTGACCTAATATGATGGTAACAAACAATACCTTCACACTCAAAGGCGGTGCA | 2722 |
| gb:MT049951 | Organism:Severe | TGTGCCCTTGACCTAATATGATGGTAACAAACAATACCTTCACACTCAAAGGCGGTGCA | 2722 |

|             |                 |                                                             |      |
|-------------|-----------------|-------------------------------------------------------------|------|
| gb:MN975262 | Organism:Severe | TGTGCCCTTGACCTAATATGATGGTAACAAACAATACCTTCACACTCAAAGGCGGTGCA | 2722 |
| gb:MT106052 | Organism:Severe | TGTGCCCTTGACCTAATATGATGGTAACAAACAATACCTTCACACTCAAAGGCGGTGCA | 2722 |
| gb:LC522975 | Organism:Severe | TGTGCCCTTGACCTAATATGATGGTAACAAACAATACCTTCACACTCAAAGGCGGTGCA | 2719 |
| gb:LC522973 | Organism:Severe | TGTGCCCTTGACCTAATATGATGGTAACAAACAATACCTTCACACTCAAAGGCGGTGCA | 2719 |
| gb:LC522974 | Organism:Severe | TGTGCCCTTGACCTAATATGATGGTAACAAACAATACCTTCACACTCAAAGGCGGTGCA | 2719 |
| gb:MN985325 | Organism:Severe | TGTGCCCTTGACCTAATATGATGGTAACAAACAATACCTTCACACTCAAAGGCGGTGCA | 2722 |
| gb:MT020881 | Organism:Severe | TGTGCCCTTGACCTAATATGATGGTAACAAACAATACCTTCACACTCAAAGGCGGTGCA | 2722 |
| gb:MT020880 | Organism:Severe | TGTGCCCTTGACCTAATATGATGGTAACAAACAATACCTTCACACTCAAAGGCGGTGCA | 2722 |
| gb:MT066175 | Organism:Severe | TGTGCCCTTGACCTAATATGATGGTAACAAACAATACCTTCACACTCAAAGGCGGTGCA | 2722 |
| gb:MN997409 | Organism:Severe | TGTGCCCTTGACCTAATATGATGGTAACAAACAATACCTTCACACTCAAAGGCGGTGCA | 2722 |
| gb:MN938384 | Organism:Severe | TGTGCCCTTGACCTAATATGATGGTAACAAACAATACCTTCACACTCAAAGGCGGTGCA | 2690 |
| gb:MT044258 | Organism:Severe | TGTGCCCTTGACCTAATATGATGGTAACAAACAATACCTTCACACTCAAAGGCGGTGCA | 2698 |
| gb:MT039890 | Organism:Severe | TGTGCCCTTGACCTAATATGATGGTAACAAACAATACCTTCACACTCAAAGGCGGTGCA | 2722 |
| gb:MN988713 | Organism:Severe | TGTGCCCTTGACCTAATATGATGGTAACAAACAATACCTTCACACTCAAAGGCGGTGCA | 2722 |
| gb:LC521925 | Organism:Severe | TGTGCCCTTGACCTAATATGATGGTAACAAACAATACCTTCACACTCAAAGGCGGTGCA | 2695 |
| gb:MT093571 | Organism:Severe | TGTGCCCTTGACCTAATATGATGGTAACAAACAATACCTTCACACTCAAAGGCGGTGCA | 2722 |
| gb:MT039887 | Organism:Severe | TGTGCCCTTGACCTAATATGATGGTAACAAACAATACCTTCACACTCAAAGGCGGTGCA | 2722 |
| gb:MT019530 | Organism:Severe | TGTGCCCTTGACCTAATATGATGGTAACAAACAATACCTTCACACTCAAAGGCGGTGCA | 2722 |
| gb:MT039888 | Organism:Severe | TGTGCCCTTGACCTAATATGATGGTAACAAACAATACCTTCACACTCAAAGGCGGTGCA | 2722 |
| gb:LC522972 | Organism:Severe | TGTGCCCTTGACCTAATATGATGGTAACAAACAATACCTTCACACTCAAAGGCGGTGCA | 2719 |
| gb:MT027063 | Organism:Severe | TGTGCCCTTGACCTAATATGATGGTAACAAACAATACCTTCACACTCAAAGGCGGTGCA | 2722 |
| gb:MT027062 | Organism:Severe | TGTGCCCTTGACCTAATATGATGGTAACAAACAATACCTTCACACTCAAAGGCGGTGCA | 2722 |
| gb:MT019529 | Organism:Severe | TGTGCCCTTGACCTAATATGATGGTAACAAACAATACCTTCACACTCAAAGGCGGTGCA | 2722 |
| gb:MN996529 | Organism:Severe | TGTGCCCTTGACCTAATATGATGGTAACAAACAATACCTTCACACTCAAAGGCGGTGCA | 2710 |
| gb:MN996531 | Organism:Severe | TGTGCCCTTGACCTAATATGATGGTAACAAACAATACCTTCACACTCAAAGGCGGTGCA | 2709 |
| gb:MT066176 | Organism:Severe | TGTGCCCTTGACCTAATATGATGGTAACAAACAATACCTTCACACTCAAAGGCGGTGCA | 2722 |
| gb:MT027064 | Organism:Severe | TGTGCCCTTGACCTAATATGATGGTAACAAACAATACCTTCACACTCAAAGGCGGTGCA | 2722 |
| gb:MN994468 | Organism:Severe | TGTGCCCTTGACCTAATATGATGGTAACAAACAATACCTTCACACTCAAAGGCGGTGCA | 2722 |
| gb:MT072688 | Organism:Severe | TGTGCCCTTGACCTAATATGATGGTAACAAACAATACCTTCACACTCAAAGGCGGTGCA | 2707 |
| gb:MN996527 | Organism:Severe | TGTGCCCTTGACCTAATATGATGGTAACAAACAATACCTTCACACTCAAAGGCGGTGCA | 2689 |
| gb:MT093631 | Organism:Severe | TGTGCCCTTGACCTAATATGATGGTAACAAACAATACCTTCACACTCAAAGGCGGTGCA | 2760 |
| gb:MT106053 | Organism:Severe | TGTGCCCTTGACCTAATATGATGGTAACAAACAATACCTTCACACTCAAAGGCGGTGCA | 2722 |
| gb:MT019533 | Organism:Severe | TGTGCCCTTGACCTAATATGATGGTAACAAACAATACCTTCACACTCAAAGGCGGTGCA | 2722 |
| gb:MT019531 | Organism:Severe | TGTGCCCTTGACCTAATATGATGGTAACAAACAATACCTTCACACTCAAAGGCGGTGCA | 2722 |
| gb:MN996528 | Organism:Severe | TGTGCCCTTGACCTAATATGATGGTAACAAACAATACCTTCACACTCAAAGGCGGTGCA | 2722 |
| gb:MN996530 | Organism:Severe | TGTGCCCTTGACCTAATATGATGGTAACAAACAATACCTTCACACTCAAAGGCGGTGCA | 2708 |
| gb:MN908947 | Organism:Severe | TGTGCCCTTGACCTAATATGATGGTAACAAACAATACCTTCACACTCAAAGGCGGTGCA | 2722 |
| gb:MT019532 | Organism:Severe | TGTGCCCTTGACCTAATATGATGGTAACAAACAATACCTTCACACTCAAAGGCGGTGCA | 2722 |

\*\*\*\*\*

|             |                 |                                                              |      |
|-------------|-----------------|--------------------------------------------------------------|------|
| gb:MT020781 | Organism:Severe | CCAACAAAGGTTACTTTTGGTGATGACACTGTGATAGAAGTGCAAGGTTACAAGAGTGTG | 2770 |
| gb:MT007544 | Organism:Severe | CCAACAAAGGTTACTTTTGGTGATGACACTGTGATAGAAGTGCAAGGTTACAAGAGTGTG | 2782 |
| gb:MN994467 | Organism:Severe | CCAACAAAGGTTACTTTTGGTGATGACACTGTGATAGAAGTGCAAGGTTACAAGAGTGTG | 2782 |
| gb:MT044257 | Organism:Severe | CCAACAAAGGTTACTTTTGGTGATGACACTGTGATAGAAGTGCAAGGTTACAAGAGTGTG | 2782 |
| gb:MT106054 | Organism:Severe | CCAACAAAGGTTACTTTTGGTGATGACACTGTGATAGAAGTGCAAGGTTACAAGAGTGTG | 2782 |
| gb:MT049951 | Organism:Severe | CCAACAAAGGTTACTTTTGGTGATGACACTGTGATAGAAGTGCAAGGTTACAAGAGTGTG | 2782 |
| gb:MN975262 | Organism:Severe | CCAACAAAGGTTACTTTTGGTGATGACACTGTGATAGAAGTGCAAGGTTACAAGAGTGTG | 2782 |
| gb:MT106052 | Organism:Severe | CCAACAAAGGTTACTTTTGGTGATGACACTGTGATAGAAGTGCAAGGTTACAAGAGTGTG | 2782 |
| gb:LC522975 | Organism:Severe | CCAACAAAGGTTACTTTTGGTGATGACACTGTGATAGAAGTGCAAGGTTACAAGAGTGTG | 2779 |
| gb:LC522973 | Organism:Severe | CCAACAAAGGTTACTTTTGGTGATGACACTGTGATAGAAGTGCAAGGTTACAAGAGTGTG | 2779 |
| gb:LC522974 | Organism:Severe | CCAACAAAGGTTACTTTTGGTGATGACACTGTGATAGAAGTGCAAGGTTACAAGAGTGTG | 2779 |
| gb:MN985325 | Organism:Severe | CCAACAAAGGTTACTTTTGGTGATGACACTGTGATAGAAGTGCAAGGTTACAAGAGTGTG | 2782 |
| gb:MT020881 | Organism:Severe | CCAACAAAGGTTACTTTTGGTGATGACACTGTGATAGAAGTGCAAGGTTACAAGAGTGTG | 2782 |
| gb:MT020880 | Organism:Severe | CCAACAAAGGTTACTTTTGGTGATGACACTGTGATAGAAGTGCAAGGTTACAAGAGTGTG | 2782 |
| gb:MT066175 | Organism:Severe | CCAACAAAGGTTACTTTTGGTGATGACACTGTGATAGAAGTGCAAGGTTACAAGAGTGTG | 2782 |
| gb:MN997409 | Organism:Severe | CCAACAAAGGTTACTTTTGGTGATGACACTGTGATAGAAGTGCAAGGTTACAAGAGTGTG | 2782 |
| gb:MN938384 | Organism:Severe | CCAACAAAGGTTACTTTTGGTGATGACACTGTGATAGAAGTGCAAGGTTACAAGAGTGTG | 2750 |
| gb:MT044258 | Organism:Severe | CCAACAAAGGTTACTTTTGGTGATGACACTGTGATAGAAGTGCAAGGTTACAAGAGTGTG | 2758 |
| gb:MT039890 | Organism:Severe | CCAACAAAGGTTACTTTTGGTGATGACACTGTGATAGAAGTGCAAGGTTACAAGAGTGTG | 2782 |
| gb:MN988713 | Organism:Severe | CCAACAAAGGTTACTTTTGGTGATGACACTGTGATAGAAGTGCAAGGTTACAAGAGTGTG | 2782 |
| gb:LC521925 | Organism:Severe | CCAACAAAGGTTACTTTTGGTGATGACACTGTGATAGAAGTGCAAGGTTACAAGAGTGTG | 2755 |
| gb:MT093571 | Organism:Severe | CCAACAAAGGTTACTTTTGGTGATGACACTGTGATAGAAGTGCAAGGTTACAAGAGTGTG | 2782 |
| gb:MT039887 | Organism:Severe | CCAACAAAGGTTACTTTTGGTGATGACACTGTGATAGAAGTGCAAGGTTACAAGAGTGTG | 2782 |
| gb:MT019530 | Organism:Severe | CCAACAAAGGTTACTTTTGGTGATGACACTGTGATAGAAGTGCAAGGTTACAAGAGTGTG | 2782 |
| gb:MT039888 | Organism:Severe | CCAACAAAGGTTACTTTTGGTGATGACACTGTGATAGAAGTGCAAGGTTACAAGAGTGTG | 2782 |

|             |                 |                                                              |      |
|-------------|-----------------|--------------------------------------------------------------|------|
| gb:LC522972 | Organism:Severe | CCAACAAAGGTTACTTTTGGTGATGACACTGTGATAGAAGTGCAAGGTTACAAGAGTGTG | 2779 |
| gb:MT027063 | Organism:Severe | CCAACAAAGGTTACTTTTGGTGATGACACTGTGATAGAAGTGCAAGGTTACAAGAGTGTG | 2782 |
| gb:MT027062 | Organism:Severe | CCAACAAAGGTTACTTTTGGTGATGACACTGTGATAGAAGTGCAAGGTTACAAGAGTGTG | 2782 |
| gb:MT019529 | Organism:Severe | CCAACAAAGGTTACTTTTGGTGATGACACTGTGATAGAAGTGCAAGGTTACAAGAGTGTG | 2782 |
| gb:MN996529 | Organism:Severe | CCAACAAAGGTTACTTTTGGTGATGACACTGTGATAGAAGTGCAAGGTTACAAGAGTGTG | 2770 |
| gb:MN996531 | Organism:Severe | CCAACAAAGGTTACTTTTGGTGATGACACTGTGATAGAAGTGCAAGGTTACAAGAGTGTG | 2769 |
| gb:MT066176 | Organism:Severe | CCAACAAAGGTTACTTTTGGTGATGACACTGTGATAGAAGTGCAAGGTTACAAGAGTGTG | 2782 |
| gb:MT027064 | Organism:Severe | CCAACAAAGGTTACTTTTGGTGATGACACTGTGATAGAAGTGCAAGGTTACAAGAGTGTG | 2782 |
| gb:MN994468 | Organism:Severe | CCAACAAAGGTTACTTTTGGTGATGACACTGTGATAGAAGTGCAAGGTTACAAGAGTGTG | 2782 |
| gb:MT072688 | Organism:Severe | CCAACAAAGGTTACTTTTGGTGATGACACTGTGATAGAAGTGCAAGGTTACAAGAGTGTG | 2767 |
| gb:MN996527 | Organism:Severe | CCAACAAAGGTTACTTTTGGTGATGACACTGTGATAGAAGTGCAAGGTTACAAGAGTGTG | 2749 |
| gb:MT093631 | Organism:Severe | CCAACAAAGGTTACTTTTGGTGATGACACTGTGATAGAAGTGCAAGGTTACAAGAGTGTG | 2820 |
| gb:MT106053 | Organism:Severe | CCAACAAAGGTTACTTTTGGTGATGACACTGTGATAGAAGTGCAAGGTTACAAGAGTGTG | 2782 |
| gb:MT019533 | Organism:Severe | CCAACAAAGGTTACTTTTGGTGATGACACTGTGATAGAAGTGCAAGGTTACAAGAGTGTG | 2782 |
| gb:MT019531 | Organism:Severe | CCAACAAAGGTTACTTTTGGTGATGACACTGTGATAGAAGTGCAAGGTTACAAGAGTGTG | 2782 |
| gb:MN996528 | Organism:Severe | CCAACAAAGGTTACTTTTGGTGATGACACTGTGATAGAAGTGCAAGGTTACAAGAGTGTG | 2782 |
| gb:MN996530 | Organism:Severe | CCAACAAAGGTTACTTTTGGTGATGACACTGTGATAGAAGTGCAAGGTTACAAGAGTGTG | 2768 |
| gb:MN908947 | Organism:Severe | CCAACAAAGGTTACTTTTGGTGATGACACTGTGATAGAAGTGCAAGGTTACAAGAGTGTG | 2782 |
| gb:MT019532 | Organism:Severe | CCAACAAAGGTTACTTTTGGTGATGACACTGTGATAGAAGTGCAAGGTTACAAGAGTGTG | 2782 |

\*\*\*\*\*

|             |                 |                                                               |      |
|-------------|-----------------|---------------------------------------------------------------|------|
| gb:MT020781 | Organism:Severe | AATATCACTTTTGAAC TTGATGAAAGGATTGATAAAGTACTTAATGAGAAGTGCTCTGCC | 2830 |
| gb:MT007544 | Organism:Severe | AATATCACTTTTGAAC TTGATGAAAGGATTGATAAAGTACTTAATGAGAAGTGCTCTGCC | 2842 |
| gb:MN994467 | Organism:Severe | AATATCACTTTTGAAC TTGATGAAAGGATTGATAAAGTACTTAATGAGAAGTGCTCTGCC | 2842 |
| gb:MT044257 | Organism:Severe | AATATCACTTTTGAAC TTGATGAAAGGATTGATAAAGTACTTAATGAGAAGTGCTCTGCC | 2842 |
| gb:MT106054 | Organism:Severe | AATATCACTTTTGAAC TTGATGAAAGGATTGATAAAGTACTTAATGAGAAGTGCTCTGCC | 2842 |
| gb:MT049951 | Organism:Severe | AATATCACTTTTGAAC TTGATGAAAGGATTGATAAAGTACTTAATGAGAAGTGCTCTGCC | 2842 |
| gb:MN975262 | Organism:Severe | AATATCACTTTTGAAC TTGATGAAAGGATTGATAAAGTACTTAATGAGAAGTGCTCTGCC | 2842 |
| gb:MT106052 | Organism:Severe | AATATCACTTTTGAAC TTGATGAAAGGATTGATAAAGTACTTAATGAGAAGTGCTCTGCC | 2842 |
| gb:LC522975 | Organism:Severe | AATATCACTTTTGAAC TTGATGAAAGGATTGATAAAGTACTTAATGAGAAGTGCTCTGCC | 2839 |
| gb:LC522973 | Organism:Severe | AATATCACTTTTGAAC TTGATGAAAGGATTGATAAAGTACTTAATGAGAAGTGCTCTGCC | 2839 |
| gb:LC522974 | Organism:Severe | AATATCACTTTTGAAC TTGATGAAAGGATTGATAAAGTACTTAATGAGAAGTGCTCTGCC | 2839 |
| gb:MN985325 | Organism:Severe | AATATCACTTTTGAAC TTGATGAAAGGATTGATAAAGTACTTAATGAGAAGTGCTCTGCC | 2842 |
| gb:MT020881 | Organism:Severe | AATATCACTTTTGAAC TTGATGAAAGGATTGATAAAGTACTTAATGAGAAGTGCTCTGCC | 2842 |
| gb:MT020880 | Organism:Severe | AATATCACTTTTGAAC TTGATGAAAGGATTGATAAAGTACTTAATGAGAAGTGCTCTGCC | 2842 |
| gb:MT066175 | Organism:Severe | AATATCACTTTTGAAC TTGATGAAAGGATTGATAAAGTACTTAATGAGAAGTGCTCTGCC | 2842 |
| gb:MN997409 | Organism:Severe | AATATCACTTTTGAAC TTGATGAAAGGATTGATAAAGTACTTAATGAGAAGTGCTCTGCC | 2842 |
| gb:MN938384 | Organism:Severe | AATATCACTTTTGAAC TTGATGAAAGGATTGATAAAGTACTTAATGAGAAGTGCTCTGCC | 2810 |
| gb:MT044258 | Organism:Severe | AATATCACTTTTGAAC TTGATGAAAGGATTGATAAAGTACTTAATGAGAAGTGCTCTGCC | 2818 |
| gb:MT039890 | Organism:Severe | AATATCACTTTTGAAC TTGATGAAAGGATTGATAAAGTACTTAATGAGAAGTGCTCTGCC | 2842 |
| gb:MN988713 | Organism:Severe | AATATCACTTTTGAAC TTGATGAAAGGATTGATAAAGTACTTAATGAGAAGTGCTCTGCC | 2842 |
| gb:LC521925 | Organism:Severe | AATATCACTTTTGAAC TTGATGAAAGGATTGATAAAGTACTTAATGAGAAGTGCTCTGCC | 2815 |
| gb:MT093571 | Organism:Severe | AATATCACTTTTGAAC TTGATGAAAGGATTGATAAAGTACTTAATGAGAAGTGCTCTGCC | 2842 |
| gb:MT039887 | Organism:Severe | AATATCACTTTTGAAC TTGATGAAAGGATTGATAAAGTACTTAATGAGAAGTGCTCTGCC | 2842 |
| gb:MT019530 | Organism:Severe | AATATCACTTTTGAAC TTGATGAAAGGATTGATAAAGTACTTAATGAGAAGTGCTCTGCC | 2842 |
| gb:MT039888 | Organism:Severe | AATATCACTTTTGAAC TTGATGAAAGGATTGATAAAGTACTTAATGAGAAGTGCTCTGCC | 2842 |
| gb:LC522972 | Organism:Severe | AATATCACTTTTGAAC TTGATGAAAGGATTGATAAAGTACTTAATGAGAAGTGCTCTGCC | 2839 |
| gb:MT027063 | Organism:Severe | AATATCACTTTTGAAC TTGATGAAAGGATTGATAAAGTACTTAATGAGAAGTGCTCTGCC | 2842 |
| gb:MT027062 | Organism:Severe | AATATCACTTTTGAAC TTGATGAAAGGATTGATAAAGTACTTAATGAGAAGTGCTCTGCC | 2842 |
| gb:MT019529 | Organism:Severe | AATATCACTTTTGAAC TTGATGAAAGGATTGATAAAGTACTTAATGAGAAGTGCTCTGCC | 2842 |
| gb:MN996529 | Organism:Severe | AATATCACTTTTGAAC TTGATGAAAGGATTGATAAAGTACTTAATGAGAAGTGCTCTGCC | 2830 |
| gb:MN996531 | Organism:Severe | AATATCACTTTTGAAC TTGATGAAAGGATTGATAAAGTACTTAATGAGAAGTGCTCTGCC | 2829 |
| gb:MT066176 | Organism:Severe | AATATCACTTTTGAAC TTGATGAAAGGATTGATAAAGTACTTAATGAGAAGTGCTCTGCC | 2842 |
| gb:MT027064 | Organism:Severe | AATATCACTTTTGAAC TTGATGAAAGGATTGATAAAGTACTTAATGAGAAGTGCTCTGCC | 2842 |
| gb:MN994468 | Organism:Severe | AATATCACTTTTGAAC TTGATGAAAGGATTGATAAAGTACTTAATGAGAAGTGCTCTGCC | 2842 |
| gb:MT072688 | Organism:Severe | AATATCACTTTTGAAC TTGATGAAAGGATTGATAAAGTACTTAATGAGAAGTGCTCTGCC | 2827 |
| gb:MN996527 | Organism:Severe | AATATCACTTTTGAAC TTGATGAAAGGATTGATAAAGTACTTAATGAGAAGTGCTCTGCC | 2809 |
| gb:MT093631 | Organism:Severe | AATATCACTTTTGAAC TTGATGAAAGGATTGATAAAGTACTTAATGAGAAGTGCTCTGCC | 2880 |
| gb:MT106053 | Organism:Severe | AATATCACTTTTGAAC TTGATGAAAGGATTGATAAAGTACTTAATGAGAAGTGCTCTGCC | 2842 |
| gb:MT019533 | Organism:Severe | AATATCACTTTTGAAC TTGATGAAAGGATTGATAAAGTACTTAATGAGAAGTGCTCTGCC | 2842 |
| gb:MT019531 | Organism:Severe | AATATCACTTTTGAAC TTGATGAAAGGATTGATAAAGTACTTAATGAGAAGTGCTCTGCC | 2842 |
| gb:MN996528 | Organism:Severe | AATATCACTTTTGAAC TTGATGAAAGGATTGATAAAGTACTTAATGAGAAGTGCTCTGCC | 2842 |
| gb:MN996530 | Organism:Severe | AATATCACTTTTGAAC TTGATGAAAGGATTGATAAAGTACTTAATGAGAAGTGCTCTGCC | 2828 |
| gb:MN908947 | Organism:Severe | AATATCACTTTTGAAC TTGATGAAAGGATTGATAAAGTACTTAATGAGAAGTGCTCTGCC | 2842 |
| gb:MT019532 | Organism:Severe | AATATCACTTTTGAAC TTGATGAAAGGATTGATAAAGTACTTAATGAGAAGTGCTCTGCC | 2842 |

\*\*\*\*\*

|             |                  |                                                              |      |
|-------------|------------------|--------------------------------------------------------------|------|
| gb:MT020781 | Organism: Severe | TATACAGTTGAACTCGGTACAGAAGTAAATGAGTTCGCCTGTGTTGTGGCAGATGCTGTC | 2890 |
| gb:MT007544 | Organism: Severe | TATACAGTTGAACTCGGTACAGAAGTAAATGAGTTCGCCTGTGTTGTGGCAGATGCTGTC | 2902 |
| gb:MN994467 | Organism: Severe | TATACAGTTGAACTCGGTACAGAAGTAAATGAGTTCGCCTGTGTTGTGGCAGATGCTGTC | 2902 |
| gb:MT044257 | Organism: Severe | TATACAGTTGAACTCGGTACAGAAGTAAATGAGTTCGCCTGTGTTGTGGCAGATGCTGTC | 2902 |
| gb:MT106054 | Organism: Severe | TATACAGTTGAACTCGGTACAGAAGTAAATGAGTTCGCCTGTGTTGTGGCAGATGCTGTC | 2902 |
| gb:MT049951 | Organism: Severe | TATACAGTTGAACTCGGTACAGAAGTAAATGAGTTCGCCTGTGTTGTGGCAGATGCTGTC | 2902 |
| gb:MN975262 | Organism: Severe | TATACAGTTGAACTCGGTACAGAAGTAAATGAGTTCGCCTGTGTTGTGGCAGATGCTGTC | 2902 |
| gb:MT106052 | Organism: Severe | TATACAGTTGAACTCGGTACAGAAGTAAATGAGTTCGCCTGTGTTGTGGCAGATGCTGTC | 2902 |
| gb:LC522975 | Organism: Severe | TATACAGTTGAACTCGGTACAGAAGTAAATGAGTTCGCCTGTGTTGTGGCAGATGCTGTC | 2899 |
| gb:LC522973 | Organism: Severe | TATACAGTTGAACTCGGTACAGAAGTAAATGAGTTCGCCTGTGTTGTGGCAGATGCTGTC | 2899 |
| gb:LC522974 | Organism: Severe | TATACAGTTGAACTCGGTACAGAAGTAAATGAGTTCGCCTGTGTTGTGGCAGATGCTGTC | 2899 |
| gb:MN985325 | Organism: Severe | TATACAGTTGAACTCGGTACAGAAGTAAATGAGTTCGCCTGTGTTGTGGCAGATGCTGTC | 2902 |
| gb:MT020881 | Organism: Severe | TATACAGTTGAACTCGGTACAGAAGTAAATGAGTTCGCCTGTGTTGTGGCAGATGCTGTC | 2902 |
| gb:MT020880 | Organism: Severe | TATACAGTTGAACTCGGTACAGAAGTAAATGAGTTCGCCTGTGTTGTGGCAGATGCTGTC | 2902 |
| gb:MT066175 | Organism: Severe | TATACAGTTGAACTCGGTACAGAAGTAAATGAGTTCGCCTGTGTTGTGGCAGATGCTGTC | 2902 |
| gb:MN997409 | Organism: Severe | TATACAGTTGAACTCGGTACAGAAGTAAATGAGTTCGCCTGTGTTGTGGCAGATGCTGTC | 2902 |
| gb:MN938384 | Organism: Severe | TATACAGTTGAACTCGGTACAGAAGTAAATGAGTTCGCCTGTGTTGTGGCAGATGCTGTC | 2870 |
| gb:MT044258 | Organism: Severe | TATACAGTTGAACTCGGTACAGAAGTAAATGAGTTCGCCTGTGTTGTGGCAGATGCTGTC | 2878 |
| gb:MT039890 | Organism: Severe | TATACAGTTGAACTCGGTACAGAAGTAAATGAGTTCGCCTGTGTTGTGGCAGATGCTGTC | 2902 |
| gb:MN988713 | Organism: Severe | TATACAGTTGAACTCGGTACAGAAGTAAATGAGTTCGCCTGTGTTGTGGCAGATGCTGTC | 2902 |
| gb:LC521925 | Organism: Severe | TATACAGTTGAACTCGGTACAGAAGTAAATGAGTTCGCCTGTGTTGTGGCAGATGCTGTC | 2875 |
| gb:MT093571 | Organism: Severe | TATACAGTTGAACTCGGTACAGAAGTAAATGAGTTCGCCTGTGTTGTGGCAGATGCTGTC | 2902 |
| gb:MT039887 | Organism: Severe | TATACAGTTGAACTCGGTACAGAAGTAAATGAGTTCGCCTGTGTTGTGGCAGATGCTGTC | 2902 |
| gb:MT019530 | Organism: Severe | TATACAGTTGAACTCGGTACAGAAGTAAATGAGTTCGCCTGTGTTGTGGCAGATGCTGTC | 2902 |
| gb:MT039888 | Organism: Severe | TATACAGTTGAACTCGGTACAGAAGTAAATGAGTTCGCCTGTGTTGTGGCAGATGCTGTC | 2902 |
| gb:LC522972 | Organism: Severe | TATACAGTTGAACTCGGTACAGAAGTAAATGAGTTCGCCTGTGTTGTGGCAGATGCTGTC | 2899 |
| gb:MT027063 | Organism: Severe | TATACAGTTGAACTCGGTACAGAAGTAAATGAGTTCGCCTGTGTTGTGGCAGATGCTGTC | 2902 |
| gb:MT027062 | Organism: Severe | TATACAGTTGAACTCGGTACAGAAGTAAATGAGTTCGCCTGTGTTGTGGCAGATGCTGTC | 2902 |
| gb:MT019529 | Organism: Severe | TATACAGTTGAACTCGGTACAGAAGTAAATGAGTTCGCCTGTGTTGTGGCAGATGCTGTC | 2902 |
| gb:MN996529 | Organism: Severe | TATACAGTTGAACTCGGTACAGAAGTAAATGAGTTCGCCTGTGTTGTGGCAGATGCTGTC | 2890 |
| gb:MN996531 | Organism: Severe | TATACAGTTGAACTCGGTACAGAAGTAAATGAGTTCGCCTGTGTTGTGGCAGATGCTGTC | 2889 |
| gb:MT066176 | Organism: Severe | TATACAGTTGAACTCGGTACAGAAGTAAATGAGTTCGCCTGTGTTGTGGCAGATGCTGTC | 2902 |
| gb:MT027064 | Organism: Severe | TATACAGTTGAACTCGGTACAGAAGTAAATGAGTTCGCCTGTGTTGTGGCAGATGCTGTC | 2902 |
| gb:MN994468 | Organism: Severe | TATACAGTTGAACTCGGTACAGAAGTAAATGAGTTCGCCTGTGTTGTGGCAGATGCTGTC | 2902 |
| gb:MT072688 | Organism: Severe | TATACAGTTGAACTCGGTACAGAAGTAAATGAGTTCGCCTGTGTTGTGGCAGATGCTGTC | 2887 |
| gb:MN996527 | Organism: Severe | TATACAGTTGAACTCGGTACAGAAGTAAATGAGTTCGCCTGTGTTGTGGCAGATGCTGTC | 2869 |
| gb:MT093631 | Organism: Severe | TATACAGTTGAACTCGGTACAGAAGTAAATGAGTTCGCCTGTGTTGTGGCAGATGCTGTC | 2940 |
| gb:MT106053 | Organism: Severe | TATACAGTTGAACTCGGTACAGAAGTAAATGAGTTCGCCTGTGTTGTGGCAGATGCTGTC | 2902 |
| gb:MT019533 | Organism: Severe | TATACAGTTGAACTCGGTACAGAAGTAAATGAGTTCGCCTGTGTTGTGGCAGATGCTGTC | 2902 |
| gb:MT019531 | Organism: Severe | TATACAGTTGAACTCGGTACAGAAGTAAATGAGTTCGCCTGTGTTGTGGCAGATGCTGTC | 2902 |
| gb:MN996528 | Organism: Severe | TATACAGTTGAACTCGGTACAGAAGTAAATGAGTTCGCCTGTGTTGTGGCAGATGCTGTC | 2902 |
| gb:MN996530 | Organism: Severe | TATACAGTTGAACTCGGTACAGAAGTAAATGAGTTCGCCTGTGTTGTGGCAGATGCTGTC | 2888 |
| gb:MN908947 | Organism: Severe | TATACAGTTGAACTCGGTACAGAAGTAAATGAGTTCGCCTGTGTTGTGGCAGATGCTGTC | 2902 |
| gb:MT019532 | Organism: Severe | TATACAGTTGAACTCGGTACAGAAGTAAATGAGTTCGCCTGTGTTGTGGCAGATGCTGTC | 2902 |

\*\*\*\*\*

|             |                  |                                                              |      |
|-------------|------------------|--------------------------------------------------------------|------|
| gb:MT020781 | Organism: Severe | ATAAAAACTTTGCAACCAGTATCTGAATTACTTACACCACTGGGCATTGATTTAGATGAG | 2950 |
| gb:MT007544 | Organism: Severe | ATAAAAACTTTGCAACCAGTATCTGAATTACTTACACCACTGGGCATTGATTTAGATGAG | 2962 |
| gb:MN994467 | Organism: Severe | ATAAAAACTTTGCAACCAGTATCTGAATTACTTACACCACTGGGCATTGATTTAGATGAG | 2962 |
| gb:MT044257 | Organism: Severe | ATAAAAACTTTGCAACCAGTATCTGAATTACTTACACCACTGGGCATTGATTTAGATGAG | 2962 |
| gb:MT106054 | Organism: Severe | ATAAAAACTTTGCAACCAGTATCTGAATTACTTACACCACTGGGCATTGATTTAGATGAG | 2962 |
| gb:MT049951 | Organism: Severe | ATAAAAACTTTGCAACCAGTATCTGAATTACTTACACCACTGGGCATTGATTTAGATGAG | 2962 |
| gb:MN975262 | Organism: Severe | ATAAAAACTTTGCAACCAGTATCTGAATTACTTACACCACTGGGCATTGATTTAGATGAG | 2962 |
| gb:MT106052 | Organism: Severe | ATAAAAACTTTGCAACCAGTATCTGAATTACTTACACCACTGGGCATTGATTTAGATGAG | 2962 |
| gb:LC522975 | Organism: Severe | ATAAAAACTTTGCAACCAGTATCTGAATTACTTACACCACTGGGCATTGATTTAGATGAG | 2959 |
| gb:LC522973 | Organism: Severe | ATAAAAACTTTGCAACCAGTATCTGAATTACTTACACCACTGGGCATTGATTTAGATGAG | 2959 |
| gb:LC522974 | Organism: Severe | ATAAAAACTTTGCAACCAGTATCTGAATTACTTACACCACTGGGCATTGATTTAGATGAG | 2959 |
| gb:MN985325 | Organism: Severe | ATAAAAACTTTGCAACCAGTATCTGAATTACTTACACCACTGGGCATTGATTTAGATGAG | 2962 |
| gb:MT020881 | Organism: Severe | ATAAAAACTTTGCAACCAGTATCTGAATTACTTACACCACTGGGCATTGATTTAGATGAG | 2962 |
| gb:MT020880 | Organism: Severe | ATAAAAACTTTGCAACCAGTATCTGAATTACTTACACCACTGGGCATTGATTTAGATGAG | 2962 |
| gb:MT066175 | Organism: Severe | ATAAAAACTTTGCAACCAGTATCTGAATTACTTACACCACTGGGCATTGATTTAGATGAG | 2962 |
| gb:MN997409 | Organism: Severe | ATAAAAACTTTGCAACCAGTATCTGAATTACTTACACCACTGGGCATTGATTTAGATGAG | 2962 |
| gb:MN938384 | Organism: Severe | ATAAAAACTTTGCAACCAGTATCTGAATTACTTACACCACTGGGCATTGATTTAGATGAG | 2930 |



|             |                 |                                                              |      |
|-------------|-----------------|--------------------------------------------------------------|------|
| gb:MT093631 | Organism:Severe | TGGAGTATGGCTACATACTACTTATTTGATGAGTCTGGTGAGTTTAAATTGGCTTCACAT | 3060 |
| gb:MT106053 | Organism:Severe | TGGAGTATGGCTACATACTACTTATTTGATGAGTCTGGTGAGTTTAAATTGGCTTCACAT | 3022 |
| gb:MT019533 | Organism:Severe | TGGAGTATGGCTACATACTACTTATTTGATGAGTCTGGTGAGTTTAAATTGGCTTCACAT | 3022 |
| gb:MT019531 | Organism:Severe | TGGAGTATGGCTACATACTACTTATTTGATGAGTCTGGTGAGTTTAAATTGGCTTCACAT | 3022 |
| gb:MN996528 | Organism:Severe | TGGAGTATGGCTACATACTACTTATTTGATGAGTCTGGTGAGTTTAAATTGGCTTCACAT | 3022 |
| gb:MN996530 | Organism:Severe | TGGAGTATGGCTACATACTACTTATTTGATGAGTCTGGTGAGTTTAAATTGGCTTCACAT | 3008 |
| gb:MN908947 | Organism:Severe | TGGAGTATGGCTACATACTACTTATTTGATGAGTCTGGTGAGTTTAAATTGGCTTCACAT | 3022 |
| gb:MT019532 | Organism:Severe | TGGAGTATGGCTACATACTACTTATTTGATGAGTCTGGTGAGTTTAAATTGGCTTCACAT | 3022 |

\*\*\*\*\*

|             |                 |                                                              |      |
|-------------|-----------------|--------------------------------------------------------------|------|
| gb:MT020781 | Organism:Severe | ATGTATTGTTCTTTCTACCCTCCAGATGAGGATGAAGAAGAAGGTGATTGTGAAGAAGAA | 3070 |
| gb:MT007544 | Organism:Severe | ATGTATTGTTCTTTCTACCCTCCAGATGAGGATGAAGAAGAAGGTGATTGTGAAGAAGAA | 3082 |
| gb:MN994467 | Organism:Severe | ATGTATTGTTCTTTCTACCCTCCAGATGAGGATGAAGAAGAAGGTGATTGTGAAGAAGAA | 3082 |
| gb:MT044257 | Organism:Severe | ATGTATTGTTCTTTCTACCCTCCAGATGAGGATGAAGAAGAAGGTGATTGTGAAGAAGAA | 3082 |
| gb:MT106054 | Organism:Severe | ATGTATTGTTCTTTCTACCCTCCAGATGAGGATGAAGAAGAAGGTGATTGTGAAGAAGAA | 3082 |
| gb:MT049951 | Organism:Severe | ATGTATTGTTCTTTCTACCCTCCAGATGAGGATGAAGAAGAAGGTGATTGTGAAGAAGAA | 3082 |
| gb:MN975262 | Organism:Severe | ATGTATTGTTCTTTCTACCCTCCAGATGAGGATGAAGAAGAAGGTGATTGTGAAGAAGAA | 3082 |
| gb:MT106052 | Organism:Severe | ATGTATTGTTCTTTCTACCCTCCAGATGAGGATGAAGAAGAAGGTGATTGTGAAGAAGAA | 3082 |
| gb:LC522975 | Organism:Severe | ATGTATTGTTCTTTCTACCCTCCAGATGAGGATGAAGAAGAAGGTGATTGTGAAGAAGAA | 3079 |
| gb:LC522973 | Organism:Severe | ATGTATTGTTCTTTCTACCCTCCAGATGAGGATGAAGAAGAAGGTGATTGTGAAGAAGAA | 3079 |
| gb:LC522974 | Organism:Severe | ATGTATTGTTCTTTCTACCCTCCAGATGAGGATGAAGAAGAAGGTGATTGTGAAGAAGAA | 3079 |
| gb:MN985325 | Organism:Severe | ATGTATTGTTCTTTCTACCCTCCAGATGAGGATGAAGAAGAAGGTGATTGTGAAGAAGAA | 3082 |
| gb:MT020881 | Organism:Severe | ATGTATTGTTCTTTCTACCCTCCAGATGAGGATGAAGAAGAAGGTGATTGTGAAGAAGAA | 3082 |
| gb:MT020880 | Organism:Severe | ATGTATTGTTCTTTCTACCCTCCAGATGAGGATGAAGAAGAAGGTGATTGTGAAGAAGAA | 3082 |
| gb:MT066175 | Organism:Severe | ATGTATTGTTCTTTCTACCCTCCAGATGAGGATGAAGAAGAAGGTGATTGTGAAGAAGAA | 3082 |
| gb:MN997409 | Organism:Severe | ATGTATTGTTCTTTCTACCCTCCAGATGAGGATGAAGAAGAAGGTGATTGTGAAGAAGAA | 3082 |
| gb:MN938384 | Organism:Severe | ATGTATTGTTCTTTCTACCCTCCAGATGAGGATGAAGAAGAAGGTGATTGTGAAGAAGAA | 3050 |
| gb:MT044258 | Organism:Severe | ATGTATTGTTCTTTCTACCCTCCAGATGAGGATGAAGAAGAAGGTGATTGTGAAGAAGAA | 3058 |
| gb:MT039890 | Organism:Severe | ATGTATTGTTCTTTCTACCCTCCAGATGAGGATGAAGAAGAAGGTGATTGTGAAGAAGAA | 3082 |
| gb:MN988713 | Organism:Severe | ATGTATTGTTCTTTCTACCCTCCAGATGAGGATGAAGAAGAAGGTGATTGTGAAGAAGAA | 3082 |
| gb:LC521925 | Organism:Severe | ATGTATTGTTCTTTCTACCCTCCAGATGAGGATGAAGAAGAAGGTGATTGTGAAGAAGAA | 3055 |
| gb:MT093571 | Organism:Severe | ATGTATTGTTCTTTCTACCCTCCAGATGAGGATGAAGAAGAAGGTGATTGTGAAGAAGAA | 3082 |
| gb:MT039887 | Organism:Severe | ATGTATTGTTCTTTCTACCCTCCAGATGAGGATGAAGAAGAAGGTGATTGTGAAGAAGAA | 3082 |
| gb:MT019530 | Organism:Severe | ATGTATTGTTCTTTCTACCCTCCAGATGAGGATGAAGAAGAAGGTGATTGTGAAGAAGAA | 3082 |
| gb:MT039888 | Organism:Severe | ATGTATTGTTCTTTCTACCCTCCAGATGAGGATGAAGAAGAAGGTGATTGTGAAGAAGAA | 3082 |
| gb:LC522972 | Organism:Severe | ATGTATTGTTCTTTCTACCCTCCAGATGAGGATGAAGAAGAAGGTGATTGTGAAGAAGAA | 3079 |
| gb:MT027063 | Organism:Severe | ATGTATTGTTCTTTCTACCCTCCAGATGAGGATGAAGAAGAAGGTGATTGTGAAGAAGAA | 3082 |
| gb:MT027062 | Organism:Severe | ATGTATTGTTCTTTCTACCCTCCAGATGAGGATGAAGAAGAAGGTGATTGTGAAGAAGAA | 3082 |
| gb:MT019529 | Organism:Severe | ATGTATTGTTCTTTCTACCCTCCAGATGAGGATGAAGAAGAAGGTGATTGTGAAGAAGAA | 3082 |
| gb:MN996529 | Organism:Severe | ATGTATTGTTCTTTCTACCCTCCAGATGAGGATGAAGAAGAAGGTGATTGTGAAGAAGAA | 3070 |
| gb:MN996531 | Organism:Severe | ATGTATTGTTCTTTCTACCCTCCAGATGAGGATGAAGAAGAAGGTGATTGTGAAGAAGAA | 3069 |
| gb:MT066176 | Organism:Severe | ATGTATTGTTCTTTCTACCCTCCAGATGAGGATGAAGAAGAAGGTGATTGTGAAGAAGAA | 3082 |
| gb:MT027064 | Organism:Severe | ATGTATTGTTCTTTCTACCCTCCAGATGAGGATGAAGAAGAAGGTGATTGTGAAGAAGAA | 3082 |
| gb:MN994468 | Organism:Severe | ATGTATTGTTCTTTCTACCCTCCAGATGAGGATGAAGAAGAAGGTGATTGTGAAGAAGAA | 3082 |
| gb:MT072688 | Organism:Severe | ATGTATTGTTCTTTCTACCCTCCAGATGAGGATGAAGAAGAAGGTGATTGTGAAGAAGAA | 3067 |
| gb:MN996527 | Organism:Severe | ATGTATTGTTCTTTCTACCCTCCAGATGAGGATGAAGAAGAAGGTGATTGTGAAGAAGAA | 3049 |
| gb:MT093631 | Organism:Severe | ATGTATTGTTCTTTCTACCCTCCAGATGAGGATGAAGAAGAAGGTGATTGTGAAGAAGAA | 3120 |
| gb:MT106053 | Organism:Severe | ATGTATTGTTCTTTCTACCCTCCAGATGAGGATGAAGAAGAAGGTGATTGTGAAGAAGAA | 3082 |
| gb:MT019533 | Organism:Severe | ATGTATTGTTCTTTCTACCCTCCAGATGAGGATGAAGAAGAAGGTGATTGTGAAGAAGAA | 3082 |
| gb:MT019531 | Organism:Severe | ATGTATTGTTCTTTCTACCCTCCAGATGAGGATGAAGAAGAAGGTGATTGTGAAGAAGAA | 3082 |
| gb:MN996528 | Organism:Severe | ATGTATTGTTCTTTCTACCCTCCAGATGAGGATGAAGAAGAAGGTGATTGTGAAGAAGAA | 3082 |
| gb:MN996530 | Organism:Severe | ATGTATTGTTCTTTCTACCCTCCAGATGAGGATGAAGAAGAAGGTGATTGTGAAGAAGAA | 3068 |
| gb:MN908947 | Organism:Severe | ATGTATTGTTCTTTCTACCCTCCAGATGAGGATGAAGAAGAAGGTGATTGTGAAGAAGAA | 3082 |
| gb:MT019532 | Organism:Severe | ATGTATTGTTCTTTCTACCCTCCAGATGAGGATGAAGAAGAAGGTGATTGTGAAGAAGAA | 3082 |

\*\*\*\*\*

|             |                 |                                                             |      |
|-------------|-----------------|-------------------------------------------------------------|------|
| gb:MT020781 | Organism:Severe | GAGTTTGACCCATCAACTCAATATGAGTATGGTACTGAAGATGATTACCAAGGTAACCT | 3130 |
| gb:MT007544 | Organism:Severe | GAGTTTGACCCATCAACTCAATATGAGTATGGTACTGAAGATGATTACCAAGGTAACCT | 3142 |
| gb:MN994467 | Organism:Severe | GAGTTTGACCCATCAACTCAATATGAGTATGGTACTGAAGATGATTACCAAGGTAACCT | 3142 |
| gb:MT044257 | Organism:Severe | GAGTTTGACCCATCAACTCAATATGAGTATGGTACTGAAGATGATTACCAAGGTAACCT | 3142 |
| gb:MT106054 | Organism:Severe | GAGTTTGACCCATCAACTCAATATGAGTATGGTACTGAAGATGATTACCAAGGTAACCT | 3142 |
| gb:MT049951 | Organism:Severe | GAGTTTGACCCATCAACTCAATATGAGTATGGTACTGAAGATGATTACCAAGGTAACCT | 3142 |
| gb:MN975262 | Organism:Severe | GAGTTTGACCCATCAACTCAATATGAGTATGGTACTGAAGATGATTACCAAGGTAACCT | 3142 |
| gb:MT106052 | Organism:Severe | GAGTTTGACCCATCAACTCAATATGAGTATGGTACTGAAGATGATTACCAAGGTAACCT | 3142 |
| gb:LC522975 | Organism:Severe | GAGTTTGACCCATCAACTCAATATGAGTATGGTACTGAAGATGATTACCAAGGTAACCT | 3139 |

|             |                 |                                                            |      |
|-------------|-----------------|------------------------------------------------------------|------|
| gb:LC522973 | Organism:Severe | GAGTTTGACCATCAACTCAATATGAGTATGGTACTGAAGATGATTACCAAGGTAACCT | 3139 |
| gb:LC522974 | Organism:Severe | GAGTTTGACCATCAACTCAATATGAGTATGGTACTGAAGATGATTACCAAGGTAACCT | 3139 |
| gb:MN985325 | Organism:Severe | GAGTTTGACCATCAACTCAATATGAGTATGGTACTGAAGATGATTACCAAGGTAACCT | 3142 |
| gb:MT020881 | Organism:Severe | GAGTTTGACCATCAACTCAATATGAGTATGGTACTGAAGATGATTACCAAGGTAACCT | 3142 |
| gb:MT020880 | Organism:Severe | GAGTTTGACCATCAACTCAATATGAGTATGGTACTGAAGATGATTACCAAGGTAACCT | 3142 |
| gb:MT066175 | Organism:Severe | GAGTTTGACCATCAACTCAATATGAGTATGGTACTGAAGATGATTACCAAGGTAACCT | 3142 |
| gb:MN997409 | Organism:Severe | GAGTTTGACCATCAACTCAATATGAGTATGGTACTGAAGATGATTACCAAGGTAACCT | 3142 |
| gb:MN938384 | Organism:Severe | GAGTTTGACCATCAACTCAATATGAGTATGGTACTGAAGATGATTACCAAGGTAACCT | 3110 |
| gb:MT044258 | Organism:Severe | GAGTTTGACCATCAACTCAATATGAGTATGGTACTGAAGATGATTACCAAGGTAACCT | 3118 |
| gb:MT039890 | Organism:Severe | GAGTTTGACCATCAACTCAATATGAGTATGGTACTGAAGATGATTACCAAGGTAACCT | 3142 |
| gb:MN988713 | Organism:Severe | GAGTTTGACCATCAACTCAATATGAGTATGGTACTGAAGATGATTACCAAGGTAACCT | 3142 |
| gb:LC521925 | Organism:Severe | GAGTTTGACCATCAACTCAATATGAGTATGGTACTGAAGATGATTACCAAGGTAACCT | 3115 |
| gb:MT093571 | Organism:Severe | GAGTTTGACCATCAACTCAATATGAGTATGGTACTGAAGATGATTACCAAGGTAACCT | 3142 |
| gb:MT039887 | Organism:Severe | GAGTTTGACCATCAACTCAATATGAGTATGGTACTGAAGATGATTACCAAGGTAACCT | 3142 |
| gb:MT019530 | Organism:Severe | GAGTTTGACCATCAACTCAATATGAGTATGGTACTGAAGATGATTACCAAGGTAACCT | 3142 |
| gb:MT039888 | Organism:Severe | GAGTTTGACCATCAACTCAATATGAGTATGGTACTGAAGATGATTACCAAGGTAACCT | 3142 |
| gb:LC522972 | Organism:Severe | GAGTTTGACCATCAACTCAATATGAGTATGGTACTGAAGATGATTACCAAGGTAACCT | 3139 |
| gb:MT027063 | Organism:Severe | GAGTTTGACCATCAACTCAATATGAGTATGGTACTGAAGATGATTACCAAGGTAACCT | 3142 |
| gb:MT027062 | Organism:Severe | GAGTTTGACCATCAACTCAATATGAGTATGGTACTGAAGATGATTACCAAGGTAACCT | 3142 |
| gb:MT019529 | Organism:Severe | GAGTTTGACCATCAACTCAATATGAGTATGGTACTGAAGATGATTACCAAGGTAACCT | 3142 |
| gb:MN996529 | Organism:Severe | GAGTTTGACCATCAACTCAATATGAGTATGGTACTGAAGATGATTACCAAGGTAACCT | 3130 |
| gb:MN996531 | Organism:Severe | GAGTTTGACCATCAACTCAATATGAGTATGGTACTGAAGATGATTACCAAGGTAACCT | 3129 |
| gb:MT066176 | Organism:Severe | GAGTTTGACCATCAACTCAATATGAGTATGGTACTGAAGATGATTACCAAGGTAACCT | 3142 |
| gb:MT027064 | Organism:Severe | GAGTTTGACCATCAACTCAATATGAGTATGGTACTGAAGATGATTACCAAGGTAACCT | 3142 |
| gb:MN994468 | Organism:Severe | GAGTTTGACCATCAACTCAATATGAGTATGGTACTGAAGATGATTACCAAGGTAACCT | 3142 |
| gb:MT072688 | Organism:Severe | GAGTTTGACCATCAACTCAATATGAGTATGGTACTGAAGATGATTACCAAGGTAACCT | 3127 |
| gb:MN996527 | Organism:Severe | GAGTTTGACCATCAACTCAATATGAGTATGGTACTGAAGATGATTACCAAGGTAACCT | 3109 |
| gb:MT093631 | Organism:Severe | GAGTTTGACCATCAACTCAATATGAGTATGGTACTGAAGATGATTACCAAGGTAACCT | 3180 |
| gb:MT106053 | Organism:Severe | GAGTTTGACCATCAACTCAATATGAGTATGGTACTGAAGATGATTACCAAGGTAACCT | 3142 |
| gb:MT019533 | Organism:Severe | GAGTTTGACCATCAACTCAATATGAGTATGGTACTGAAGATGATTACCAAGGTAACCT | 3142 |
| gb:MT019531 | Organism:Severe | GAGTTTGACCATCAACTCAATATGAGTATGGTACTGAAGATGATTACCAAGGTAACCT | 3142 |
| gb:MN996528 | Organism:Severe | GAGTTTGACCATCAACTCAATATGAGTATGGTACTGAAGATGATTACCAAGGTAACCT | 3142 |
| gb:MN996530 | Organism:Severe | GAGTTTGACCATCAACTCAATATGAGTATGGTACTGAAGATGATTACCAAGGTAACCT | 3128 |
| gb:MN908947 | Organism:Severe | GAGTTTGACCATCAACTCAATATGAGTATGGTACTGAAGATGATTACCAAGGTAACCT | 3142 |
| gb:MT019532 | Organism:Severe | GAGTTTGACCATCAACTCAATATGAGTATGGTACTGAAGATGATTACCAAGGTAACCT | 3142 |

\*\*\*\*\*

|             |                 |                                                              |      |
|-------------|-----------------|--------------------------------------------------------------|------|
| gb:MT020781 | Organism:Severe | TTGGAATTTGGTGCCACTTCTGCTGCTCTTCAACCTGAAGAAGAGCAAGAAGAAGATTGG | 3190 |
| gb:MT007544 | Organism:Severe | TTGGAATTTGGTGCCACTTCTGCTGCTCTTCAACCTGAAGAAGAGCAAGAAGAAGATTGG | 3202 |
| gb:MN994467 | Organism:Severe | TTGGAATTTGGTGCCACTTCTGCTGCTCTTCAACCTGAAGAAGAGCAAGAAGAAGATTGG | 3202 |
| gb:MT044257 | Organism:Severe | TTGGAATTTGGTGCCACTTCTGCTGCTCTTCAACTGAAGAAGAGCAAGAAGAAGATTGG  | 3202 |
| gb:MT106054 | Organism:Severe | TTGGAATTTGGTGCCACTTCTGCTGCTCTTCAACCTGAAGAAGAGCAAGAAGAAGATTGG | 3202 |
| gb:MT049951 | Organism:Severe | TTGGAATTTGGTGCCACTTCTGCTGCTCTTCAACCTGAAGAAGAGCAAGAAGAAGATTGG | 3202 |
| gb:MN975262 | Organism:Severe | TTGGAATTTGGTGCCACTTCTGCTGCTCTTCAACCTGAAGAAGAGCAAGAAGAAGATTGG | 3202 |
| gb:MT106052 | Organism:Severe | TTGGAATTTGGTGCCACTTCTGCTGCTCTTCAACCTGAAGAAGAGCAAGAAGAAGATTGG | 3202 |
| gb:LC522975 | Organism:Severe | TTGGAATTTGGTGCCACTTCTGCTGCTCTTCAACCTGAAGAAGAGCAAGAAGAAGATTGG | 3199 |
| gb:LC522973 | Organism:Severe | TTGGAATTTGGTGCCACTTCTGCTGCTCTTCAACCTGAAGAAGAGCAAGAAGAAGATTGG | 3199 |
| gb:LC522974 | Organism:Severe | TTGGAATTTGGTGCCACTTCTGCTGCTCTTCAACCTGAAGAAGAGCAAGAAGAAGATTGG | 3199 |
| gb:MN985325 | Organism:Severe | TTGGAATTTGGTGCCACTTCTGCTGCTCTTCAACCTGAAGAAGAGCAAGAAGAAGATTGG | 3202 |
| gb:MT020881 | Organism:Severe | TTGGAATTTGGTGCCACTTCTGCTGCTCTTCAACCTGAAGAAGAGCAAGAAGAAGATTGG | 3202 |
| gb:MT020880 | Organism:Severe | TTGGAATTTGGTGCCACTTCTGCTGCTCTTCAACCTGAAGAAGAGCAAGAAGAAGATTGG | 3202 |
| gb:MT066175 | Organism:Severe | TTGGAATTTGGTGCCACTTCTGCTGCTCTTCAACCTGAAGAAGAGCAAGAAGAAGATTGG | 3202 |
| gb:MN997409 | Organism:Severe | TTGGAATTTGGTGCCACTTCTGCTGCTCTTCAACCTGAAGAAGAGCAAGAAGAAGATTGG | 3202 |
| gb:MN938384 | Organism:Severe | TTGGAATTTGGTGCCACTTCTGCTGCTCTTCAACCTGAAGAAGAGCAAGAAGAAGATTGG | 3170 |
| gb:MT044258 | Organism:Severe | TTGGAATTTGGTGCCACTTCTGCTGCTCTTCAACCTGAAGAAGAGCAAGAAGAAGATTGG | 3178 |
| gb:MT039890 | Organism:Severe | TTGGAATTTGGTGCCACTTCTGCTGCTCTTCAACCTGAAGAAGAGCAAGAAGAAGATTGG | 3202 |
| gb:MN988713 | Organism:Severe | TTGGAATTTGGTGCCACTTCTGCTGCTCTTCAACTGAAGAAGAGCAAGAAGAAGATTGG  | 3202 |
| gb:LC521925 | Organism:Severe | TTGGAATTTGGTGCCACTTCTGCTGCTCTTCAACCTGAAGAAGAGCAAGAAGAAGATTGG | 3175 |
| gb:MT093571 | Organism:Severe | TTGGAATTTGGTGCCACTTCTGCTGCTCTTCAACCTGAAGAAGAGCAAGAAGAAGATTGG | 3202 |
| gb:MT039887 | Organism:Severe | TTGGAATTTGGTGCCACTTCTGCTGCTCTTCAACCTGAAGAAGAGCAAGAAGAAGATTGG | 3202 |
| gb:MT019530 | Organism:Severe | TTGGAATTTGGTGCCACTTCTGCTGCTCTTCAACCTGAAGAAGAGCAAGAAGAAGATTGG | 3202 |
| gb:MT039888 | Organism:Severe | TTGGAATTTGGTGCCACTTCTGCTGCTCTTCAACCTGAAGAAGAGCAAGAAGAAGATTGG | 3202 |
| gb:LC522972 | Organism:Severe | TTGGAATTTGGTGCCACTTCTGCTGCTCTTCAACCTGAAGAAGAGCAAGAAGAAGATTGG | 3199 |
| gb:MT027063 | Organism:Severe | TTGGAATTTGGTGCCACTTCTGCTGCTCTTCAACCTGAAGAAGAGCAAGAAGAAGATTGG | 3202 |
| gb:MT027062 | Organism:Severe | TTGGAATTTGGTGCCACTTCTGCTGCTCTTCAACCTGAAGAAGAGCAAGAAGAAGATTGG | 3202 |

|             |                 |                                                              |      |
|-------------|-----------------|--------------------------------------------------------------|------|
| gb:MT019529 | Organism:Severe | TTGGAATTTGGTGCCACTTCTGCTGCTCTTCAACCTGAAGAAGAGCAAGAAGAAGATTGG | 3202 |
| gb:MN996529 | Organism:Severe | TTGGAATTTGGTGCCACTTCTGCTGCTCTTCAACCTGAAGAAGAGCAAGAAGAAGATTGG | 3190 |
| gb:MN996531 | Organism:Severe | TTGGAATTTGGTGCCACTTCTGCTGCTCTTCAACCTGAAGAAGAGCAAGAAGAAGATTGG | 3189 |
| gb:MT066176 | Organism:Severe | TTGGAATTTGGTGCCACTTCTGCTGCTCTTCAACCTGAAGAAGAGCAAGAAGAAGATTGG | 3202 |
| gb:MT027064 | Organism:Severe | TTGGAATTTGGTGCCACTTCTGCTGCTCTTCAACCTGAAGAAGAGCAAGAAGAAGATTGG | 3202 |
| gb:MN994468 | Organism:Severe | TTGGAATTTGGTGCCACTTCTGCTGCTCTTCAACCTGAAGAAGAGCAAGAAGAAGATTGG | 3202 |
| gb:MT072688 | Organism:Severe | TTGGAATTTGGTGCCACTTCTGCTGCTCTTCAACCTGAAGAAGAGCAAGAAGAAGATTGG | 3187 |
| gb:MN996527 | Organism:Severe | TTGGAATTTGGTGCCACTTCTGCTGCTCTTCAACCTGAAGAAGAGCAAGAAGAAGATTGG | 3169 |
| gb:MT093631 | Organism:Severe | TTGGAATTTGGTGCCACTTCTGCTGCTCTTCAACCTGAAGAAGAGCAAGAAGAAGATTGG | 3240 |
| gb:MT106053 | Organism:Severe | TTGGAATTTGGTGCCACTTCTGCTGCTCTTCAACCTGAAGAAGAGCAAGAAGAAGATTGG | 3202 |
| gb:MT019533 | Organism:Severe | TTGGAATTTGGTGCCACTTCTGCTGCTCTTCAACCTGAAGAAGAGCAAGAAGAAGATTGG | 3202 |
| gb:MT019531 | Organism:Severe | TTGGAATTTGGTGCCACTTCTGCTGCTCTTCAACCTGAAGAAGAGCAAGAAGAAGATTGG | 3202 |
| gb:MN996528 | Organism:Severe | TTGGAATTTGGTGCCACTTCTGCTGCTCTTCAACCTGAAGAAGAGCAAGAAGAAGATTGG | 3202 |
| gb:MN996530 | Organism:Severe | TTGGAATTTGGTGCCACTTCTGCTGCTCTTCAACCTGAAGAAGAGCAAGAAGAAGATTGG | 3188 |
| gb:MN908947 | Organism:Severe | TTGGAATTTGGTGCCACTTCTGCTGCTCTTCAACCTGAAGAAGAGCAAGAAGAAGATTGG | 3202 |
| gb:MT019532 | Organism:Severe | TTGGAATTTGGTGCCACTTCTGCTGCTCTTCAACCTGAAGAAGAGCAAGAAGAAGATTGG | 3202 |

\*\*\*\*\*

|             |                 |                                                             |      |
|-------------|-----------------|-------------------------------------------------------------|------|
| gb:MT020781 | Organism:Severe | TTAGATGATGATAGTCAACAACTGTTGGTCAACAAGACGGCAGTGAGGACAATCAGACA | 3250 |
| gb:MT007544 | Organism:Severe | TTAGATGATGATAGTCAACAACTGTTGGTCAACAAGACGGCAGTGAGGACAATCAGACA | 3262 |
| gb:MN994467 | Organism:Severe | TTAGATGATGATAGTCAACAACTGTTGGTCAACAAGACGGCAGTGAGGACAATCAGACA | 3262 |
| gb:MT044257 | Organism:Severe | TTAGATGATGATAGTCAACAACTGTTGGTCAACAAGACGGCAGTGAGGACAATCAGACA | 3262 |
| gb:MT106054 | Organism:Severe | TTAGATGATGATAGTCAACAACTGTTGGTCAACAAGACGGCAGTGAGGACAATCAGACA | 3262 |
| gb:MT049951 | Organism:Severe | TTAGATGATGATAGTCAACAACTGTTGGTCAACAAGACGGCAGTGAGGACAATCAGACA | 3262 |
| gb:MN975262 | Organism:Severe | TTAGATGATGATAGTCAACAACTGTTGGTCAACAAGACGGCAGTGAGGACAATCAGACA | 3262 |
| gb:MT106052 | Organism:Severe | TTAGATGATGATAGTCAACAACTGTTGGTCAACAAGACGGCAGTGAGGACAATCAGACA | 3262 |
| gb:LC522975 | Organism:Severe | TTAGATGATGATAGTCAACAACTGTTGGTCAACAAGACGGCAGTGAGGACAATCAGACA | 3259 |
| gb:LC522973 | Organism:Severe | TTAGATGATGATAGTCAACAACTGTTGGTCAACAAGACGGCAGTGAGGACAATCAGACA | 3259 |
| gb:LC522974 | Organism:Severe | TTAGATGATGATAGTCAACAACTGTTGGTCAACAAGACGGCAGTGAGGACAATCAGACA | 3259 |
| gb:MN985325 | Organism:Severe | TTAGATGATGATAGTCAACAACTGTTGGTCAACAAGACGGCAGTGAGGACAATCAGACA | 3262 |
| gb:MT020881 | Organism:Severe | TTAGATGATGATAGTCAACAACTGTTGGTCAACAAGACGGCAGTGAGGACAATCAGACA | 3262 |
| gb:MT020880 | Organism:Severe | TTAGATGATGATAGTCAACAACTGTTGGTCAACAAGACGGCAGTGAGGACAATCAGACA | 3262 |
| gb:MT066175 | Organism:Severe | TTAGATGATGATAGTCAACAACTGTTGGTCAACAAGACGGCAGTGAGGACAATCAGACA | 3262 |
| gb:MN997409 | Organism:Severe | TTAGATGATGATAGTCAACAACTGTTGGTCAACAAGACGGCAGTGAGGACAATCAGACA | 3262 |
| gb:MN938384 | Organism:Severe | TTAGATGATGATAGTCAACAACTGTTGGTCAACAAGACGGCAGTGAGGACAATCAGACA | 3230 |
| gb:MT044258 | Organism:Severe | TTAGATGATGATAGTCAACAACTGTTGGTCAACAAGACGGCAGTGAGGACAATCAGACA | 3238 |
| gb:MT039890 | Organism:Severe | TTAGATGATGATAGTCAACAACTGTTGGTCAACAAGACGGCAGTGAGGACAATCAGACA | 3262 |
| gb:MN988713 | Organism:Severe | TTAGATGATGATAGTCAACAACTGTTGGTCAACAAGACGGCAGTGAGGACAATCAGACA | 3262 |
| gb:LC521925 | Organism:Severe | TTAGATGATGATAGTCAACAACTGTTGGTCAACAAGACGGCAGTGAGGACAATCAGACA | 3235 |
| gb:MT093571 | Organism:Severe | TTAGATGATGATAGTCAACAACTGTTGGTCAACAAGACGGCAGTGAGGACAATCAGACA | 3262 |
| gb:MT039887 | Organism:Severe | TTAGATGATGATAGTCAACAACTGTTGGTCAACAAGACGGCAGTGAGGACAATCAGACA | 3262 |
| gb:MT019530 | Organism:Severe | TTAGATGATGATAGTCAACAACTGTTGGTCAACAAGACGGCAGTGAGGACAATCAGACA | 3262 |
| gb:MT039888 | Organism:Severe | TTAGATGATGATAGTCAACAACTGTTGGTCAACAAGACGGCAGTGAGGACAATCAGACA | 3262 |
| gb:LC522972 | Organism:Severe | TTAGATGATGATAGTCAACAACTGTTGGTCAACAAGACGGCAGTGAGGACAATCAGACA | 3259 |
| gb:MT027063 | Organism:Severe | TTAGATGATGATAGTCAACAACTGTTGGTCAACAAGACGGCAGTGAGGACAATCAGACA | 3262 |
| gb:MT027062 | Organism:Severe | TTAGATGATGATAGTCAACAACTGTTGGTCAACAAGACGGCAGTGAGGACAATCAGACA | 3262 |
| gb:MT019529 | Organism:Severe | TTAGATGATGATAGTCAACAACTGTTGGTCAACAAGACGGCAGTGAGGACAATCAGACA | 3262 |
| gb:MN996529 | Organism:Severe | TTAGATGATGATAGTCAACAACTGTTGGTCAACAAGACGGCAGTGAGGACAATCAGACA | 3250 |
| gb:MN996531 | Organism:Severe | TTAGATGATGATAGTCAACAACTGTTGGTCAACAAGACGGCAGTGAGGACAATCAGACA | 3249 |
| gb:MT066176 | Organism:Severe | TTAGATGATGATAGTCAACAACTGTTGGTCAACAAGACGGCAGTGAGGACAATCAGACA | 3262 |
| gb:MT027064 | Organism:Severe | TTAGATGATGATAGTCAACAACTGTTGGTCAACAAGACGGCAGTGAGGACAATCAGACA | 3262 |
| gb:MN994468 | Organism:Severe | TTAGATGATGATAGTCAACAACTGTTGGTCAACAAGACGGCAGTGAGGACAATCAGACA | 3262 |
| gb:MT072688 | Organism:Severe | TTAGATGATGATAGTCAACAACTGTTGGTCAACAAGACGGCAGTGAGGACAATCAGACA | 3247 |
| gb:MN996527 | Organism:Severe | TTAGATGATGATAGTCAACAACTGTTGGTCAACAAGACGGCAGTGAGGACAATCAGACA | 3229 |
| gb:MT093631 | Organism:Severe | TTAGATGATGATAGTCAACAACTGTTGGTCAACAAGACGGCAGTGAGGACAATCAGACA | 3300 |
| gb:MT106053 | Organism:Severe | TTAGATGATGATAGTCAACAACTGTTGGTCAACAAGACGGCAGTGAGGACAATCAGACA | 3262 |
| gb:MT019533 | Organism:Severe | TTAGATGATGATAGTCAACAACTGTTGGTCAACAAGACGGCAGTGAGGACAATCAGACA | 3262 |
| gb:MT019531 | Organism:Severe | TTAGATGATGATAGTCAACAACTGTTGGTCAACAAGACGGCAGTGAGGACAATCAGACA | 3262 |
| gb:MN996528 | Organism:Severe | TTAGATGATGATAGTCAACAACTGTTGGTCAACAAGACGGCAGTGAGGACAATCAGACA | 3262 |
| gb:MN996530 | Organism:Severe | TTAGATGATGATAGTCAACAACTGTTGGTCAACAAGACGGCAGTGAGGACAATCAGACA | 3248 |
| gb:MN908947 | Organism:Severe | TTAGATGATGATAGTCAACAACTGTTGGTCAACAAGACGGCAGTGAGGACAATCAGACA | 3262 |
| gb:MT019532 | Organism:Severe | TTAGATGATGATAGTCAACAACTGTTGGTCAACAAGACGGCAGTGAGGACAATCAGACA | 3262 |

\*\*\*\*\*

|             |                 |                                                              |      |
|-------------|-----------------|--------------------------------------------------------------|------|
| gb:MT020781 | Organism:Severe | ACTACTATTCAAACAATTGTTGAGGTTCAACCTCAATTAGAGATGGAACCTACACCAGTT | 3310 |
|-------------|-----------------|--------------------------------------------------------------|------|



|             |                 |                                                              |      |
|-------------|-----------------|--------------------------------------------------------------|------|
| gb:MT007544 | Organism:Severe | ACTACTATTCAAACAATTGTTGAGGTTCAACCTCAATTAGAGATGGAACCTACACCAGTT | 3322 |
| gb:MN994467 | Organism:Severe | ACTACTATTCAAACAATTGTTGAGGTTCAACCTCAATTAGAGATGGAACCTACACCAGTT | 3322 |
| gb:MT044257 | Organism:Severe | ACTACTATTCAAACAATTGTTGAGGTTCAACCTCAATTAGAGATGGAACCTACACCAGTT | 3322 |
| gb:MT106054 | Organism:Severe | ACTACTATTCAAACAATTGTTGAGGTTCAACCTCAATTAGAGATGGAACCTACACCAGTT | 3322 |
| gb:MT049951 | Organism:Severe | ACTACTATTCAAACAATTGTTGAGGTTCAACCTCAATTAGAGATGGAACCTACACCAGTT | 3322 |
| gb:MN975262 | Organism:Severe | ACTACTATTCAAACAATTGTTGAGGTTCAACCTCAATTAGAGATGGAACCTACACCAGTT | 3322 |
| gb:MT106052 | Organism:Severe | ACTACTATTCAAACAATTGTTGAGGTTCAACCTCAATTAGAGATGGAACCTACACCAGTT | 3322 |
| gb:LC522975 | Organism:Severe | ACTACTATTCAAACAATTGTTGAGGTTCAACCTCAATTAGAGATGGAACCTACACCAGTT | 3319 |
| gb:LC522973 | Organism:Severe | ACTACTATTCAAACAATTGTTGAGGTTCAACCTCAATTAGAGATGGAACCTACACCAGTT | 3319 |
| gb:LC522974 | Organism:Severe | ACTACTATTCAAACAATTGTTGAGGTTCAACCTCAATTAGAGATGGAACCTACACCAGTT | 3319 |
| gb:MN985325 | Organism:Severe | ACTACTATTCAAACAATTGTTGAGGTTCAACCTCAATTAGAGATGGAACCTACACCAGTT | 3322 |
| gb:MT020881 | Organism:Severe | ACTACTATTCAAACAATTGTTGAGGTTCAACCTCAATTAGAGATGGAACCTACACCAGTT | 3322 |
| gb:MT020880 | Organism:Severe | ACTACTATTCAAACAATTGTTGAGGTTCAACCTCAATTAGAGATGGAACCTACACCAGTT | 3322 |
| gb:MT066175 | Organism:Severe | ACTACTATTCAAACAATTGTTGAGGTTCAACCTCAATTAGAGATGGAACCTACACCAGTT | 3322 |
| gb:MN997409 | Organism:Severe | ACTACTATTCAAACAATTGTTGAGGTTCAACCTCAATTAGAGATGGAACCTACACCAGTT | 3322 |
| gb:MN938384 | Organism:Severe | ACTACTATTCAAACAATTGTTGAGGTTCAACCTCAATTAGAGATGGAACCTACACCAGTT | 3290 |
| gb:MT044258 | Organism:Severe | ACTACTATTCAAACAATTGTTGAGGTTCAACCTCAATTAGAGATGGAACCTACACCAGTT | 3298 |
| gb:MT039890 | Organism:Severe | ACTACTATTCAAACAATTGTTGAGGTTCAACCTCAATTAGAGATGGAACCTACACCAGTT | 3322 |
| gb:MN988713 | Organism:Severe | ACTACTATTCAAACAATTGTTGAGGTTCAACCTCAATTAGAGATGGAACCTACACCAGTT | 3322 |
| gb:LC521925 | Organism:Severe | ACTACTATTCAAACAATTGTTGAGGTTCAACCTCAATTAGAGATGGAACCTACACCAGTT | 3295 |
| gb:MT093571 | Organism:Severe | ACTACTATTCAAACAATTGTTGAGGTTCAACCTCAATTAGAGATGGAACCTACACCAGTT | 3322 |
| gb:MT039887 | Organism:Severe | ACTACTATTCAAACAATTGTTGAGGTTCAACCTCAATTAGAGATGGAACCTACACCAGTT | 3322 |
| gb:MT019530 | Organism:Severe | ACTACTATTCAAACAATTGTTGAGGTTCAACCTCAATTAGAGATGGAACCTACACCAGTT | 3322 |
| gb:MT039888 | Organism:Severe | ACTACTATTCAAACAATTGTTGAGGTTCAACCTCAATTAGAGATGGAACCTACACCAGTT | 3322 |
| gb:LC522972 | Organism:Severe | ACTACTATTCAAACAATTGTTGAGGTTCAACCTCAATTAGAGATGGAACCTACACCAGTT | 3319 |
| gb:MT027063 | Organism:Severe | ACTACTATTCAAACAATTGTTGAGGTTCAACCTCAATTAGAGATGGAACCTACACCAGTT | 3322 |
| gb:MT027062 | Organism:Severe | ACTACTATTCAAACAATTGTTGAGGTTCAACCTCAATTAGAGATGGAACCTACACCAGTT | 3322 |
| gb:MT019529 | Organism:Severe | ACTACTATTCAAACAATTGTTGAGGTTCAACCTCAATTAGAGATGGAACCTACACCAGTT | 3322 |
| gb:MN996529 | Organism:Severe | ACTACTATTCAAACAATTGTTGAGGTTCAACCTCAATTAGAGATGGAACCTACACCAGTT | 3310 |
| gb:MN996531 | Organism:Severe | ACTACTATTCAAACAATTGTTGAGGTTCAACCTCAATTAGAGATGGAACCTACACCAGTT | 3309 |
| gb:MT066176 | Organism:Severe | ACTACTATTCAAACAATTGTTGAGGTTCAACCTCAATTAGAGATGGAACCTACACCAGTT | 3322 |
| gb:MT027064 | Organism:Severe | ACTACTATTCAAACAATTGTTGAGGTTCAACCTCAATTAGAGATGGAACCTACACCAGTT | 3322 |
| gb:MN994468 | Organism:Severe | ACTACTATTCAAACAATTGTTGAGGTTCAACCTCAATTAGAGATGGAACCTACACCAGTT | 3322 |
| gb:MT072688 | Organism:Severe | ACTACTATTCAAACAATTGTTGAGGTTCAACCTCAATTAGAGATGGAACCTACACCAGTT | 3307 |
| gb:MN996527 | Organism:Severe | ACTACTATTCAAACAATTGTTGAGGTTCAACCTCAATTAGAGATGGAACCTACACCAGTT | 3289 |
| gb:MT093631 | Organism:Severe | ACTACTATTCAAACAATTGTTGAGGTTCAACCTCAATTAGAGATGGAACCTACACCAGTT | 3360 |
| gb:MT106053 | Organism:Severe | ACTACTATTCAAACAATTGTTGAGGTTCAACCTCAATTAGAGATGGAACCTACACCAGTT | 3322 |
| gb:MT019533 | Organism:Severe | ACTACTATTCAAACAATTGTTGAGGTTCAACCTCAATTAGAGATGGAACCTACACCAGTT | 3322 |
| gb:MT019531 | Organism:Severe | ACTACTATTCAAACAATTGTTGAGGTTCAACCTCAATTAGAGATGGAACCTACACCAGTT | 3322 |
| gb:MN996528 | Organism:Severe | ACTACTATTCAAACAATTGTTGAGGTTCAACCTCAATTAGAGATGGAACCTACACCAGTT | 3322 |
| gb:MN996530 | Organism:Severe | ACTACTATTCAAACAATTGTTGAGGTTCAACCTCAATTAGAGATGGAACCTACACCAGTT | 3308 |
| gb:MN908947 | Organism:Severe | ACTACTATTCAAACAATTGTTGAGGTTCAACCTCAATTAGAGATGGAACCTACACCAGTT | 3322 |
| gb:MT019532 | Organism:Severe | ACTACTATTCAAACAATTGTTGAGGTTCAACCTCAATTAGAGATGGAACCTACACCAGTT | 3322 |

\*\*\*\*\*

|             |                 |                                                               |      |
|-------------|-----------------|---------------------------------------------------------------|------|
| gb:MT020781 | Organism:Severe | GTTTCAGACTATTGAAGTGAATAGTTTTAGTGGTTATTTAAAACCTACTGACAATGTATAC | 3370 |
| gb:MT007544 | Organism:Severe | GTTTCAGACTATTGAAGTGAATAGTTTTAGTGGTTATTTAAAACCTACTGACAATGTATAC | 3382 |
| gb:MN994467 | Organism:Severe | GTTTCAGACTATTGAAGTGAATAGTTTTAGTGGTTATTTAAAACCTACTGACAATGTATAC | 3382 |
| gb:MT044257 | Organism:Severe | GTTTCAGACTATTGAAGTGAATAGTTTTAGTGGTTATTTAAAACCTACTGACAATGTATAC | 3382 |
| gb:MT106054 | Organism:Severe | GTTTCAGACTATTGAAGTGAATAGTTTTAGTGGTTATTTAAAACCTACTGACAATGTATAC | 3382 |
| gb:MT049951 | Organism:Severe | GTTTCAGACTATTGAAGTGAATAGTTTTAGTGGTTATTTAAAACCTACTGACAATGTATAC | 3382 |
| gb:MN975262 | Organism:Severe | GTTTCAGACTATTGAAGTGAATAGTTTTAGTGGTTATTTAAAACCTACTGACAATGTATAC | 3382 |
| gb:MT106052 | Organism:Severe | GTTTCAGACTATTGAAGTGAATAGTTTTAGTGGTTATTTAAAACCTACTGACAATGTATAC | 3382 |
| gb:LC522975 | Organism:Severe | GTTTCAGACTATTGAAGTGAATAGTTTTAGTGGTTATTTAAAACCTACTGACAATGTATAC | 3379 |
| gb:LC522973 | Organism:Severe | GTTTCAGACTATTGAAGTGAATAGTTTTAGTGGTTATTTAAAACCTACTGACAATGTATAC | 3379 |
| gb:LC522974 | Organism:Severe | GTTTCAGACTATTGAAGTGAATAGTTTTAGTGGTTATTTAAAACCTACTGACAATGTATAC | 3379 |
| gb:MN985325 | Organism:Severe | GTTTCAGACTATTGAAGTGAATAGTTTTAGTGGTTATTTAAAACCTACTGACAATGTATAC | 3382 |
| gb:MT020881 | Organism:Severe | GTTTCAGACTATTGAAGTGAATAGTTTTAGTGGTTATTTAAAACCTACTGACAATGTATAC | 3382 |
| gb:MT020880 | Organism:Severe | GTTTCAGACTATTGAAGTGAATAGTTTTAGTGGTTATTTAAAACCTACTGACAATGTATAC | 3382 |
| gb:MT066175 | Organism:Severe | GTTTCAGACTATTGAAGTGAATAGTTTTAGTGGTTATTTAAAACCTACTGACAATGTATAC | 3382 |
| gb:MN997409 | Organism:Severe | GTTTCAGACTATTGAAGTGAATAGTTTTAGTGGTTATTTAAAACCTACTGACAATGTATAC | 3382 |
| gb:MN938384 | Organism:Severe | GTTTCAGACTATTGAAGTGAATAGTTTTAGTGGTTATTTAAAACCTACTGACAATGTATAC | 3350 |
| gb:MT044258 | Organism:Severe | GTTTCAGACTATTGAAGTGAATAGTTTTAGTGGTTATTTAAAACCTACTGACAATGTATAC | 3358 |
| gb:MT039890 | Organism:Severe | GTTTCAGACTATTGAAGTGAATAGTTTTAGTGGTTATTTAAAACCTACTGACAATGTATAC | 3382 |
| gb:MN988713 | Organism:Severe | GTTTCAGACTATTGAAGTGAATAGTTTTAGTGGTTATTTAAAACCTACTGACAATGTATAC | 3382 |

|             |                 |                                                               |      |
|-------------|-----------------|---------------------------------------------------------------|------|
| gb:LC521925 | Organism:Severe | GTTCCAGACTATTGAAGTGAATAGTTTTAGTGGTTATTTAAAACCTACTGACAATGTATAC | 3355 |
| gb:MT093571 | Organism:Severe | GTTCCAGACTATTGAAGTGAATAGTTTTAGTGGTTATTTAAAACCTACTGACAATGTATAC | 3382 |
| gb:MT039887 | Organism:Severe | GTTCCAGACTATTGAAGTGAATAGTTTTAGTGGTTATTTAAAACCTACTGACAATGTATAC | 3382 |
| gb:MT019530 | Organism:Severe | GTTCCAGACTATTGAAGTGAATAGTTTTAGTGGTTATTTAAAACCTACTGACAATGTATAC | 3382 |
| gb:MT039888 | Organism:Severe | GTTCCAGACTATTGAAGTGAATAGTTTTAGTGGTTATTTAAAACCTACTGACAATGTATAC | 3382 |
| gb:LC522972 | Organism:Severe | GTTCCAGACTATTGAAGTGAATAGTTTTAGTGGTTATTTAAAACCTACTGACAATGTATAC | 3379 |
| gb:MT027063 | Organism:Severe | GTTCCAGACTATTGAAGTGAATAGTTTTAGTGGTTATTTAAAACCTACTGACAATGTATAC | 3382 |
| gb:MT027062 | Organism:Severe | GTTCCAGACTATTGAAGTGAATAGTTTTAGTGGTTATTTAAAACCTACTGACAATGTATAC | 3382 |
| gb:MT019529 | Organism:Severe | GTTCCAGACTATTGAAGTGAATAGTTTTAGTGGTTATTTAAAACCTACTGACAATGTATAC | 3382 |
| gb:MN996529 | Organism:Severe | GTTCCAGACTATTGAAGTGAATAGTTTTAGTGGTTATTTAAAACCTACTGACAATGTATAC | 3370 |
| gb:MN996531 | Organism:Severe | GTTCCAGACTATTGAAGTGAATAGTTTTAGTGGTTATTTAAAACCTACTGACAATGTATAC | 3369 |
| gb:MT066176 | Organism:Severe | GTTCCAGACTATTGAAGTGAATAGTTTTAGTGGTTATTTAAAACCTACTGACAATGTATAC | 3382 |
| gb:MT027064 | Organism:Severe | GTTCCAGACTATTGAAGTGAATAGTTTTAGTGGTTATTTAAAACCTACTGACAATGTATAC | 3382 |
| gb:MN994468 | Organism:Severe | GTTCCAGACTATTGAAGTGAATAGTTTTAGTGGTTATTTAAAACCTACTGACAATGTATAC | 3382 |
| gb:MT072688 | Organism:Severe | GTTCCAGACTATTGAAGTGAATAGTTTTAGTGGTTATTTAAAACCTACTGACAATGTATAC | 3367 |
| gb:MN996527 | Organism:Severe | GTTCCAGACTATTGAAGTGAATAGTTTTAGTGGTTATTTAAAACCTACTGACAATGTATAC | 3349 |
| gb:MT093631 | Organism:Severe | GTTCCAGACTATTGAAGTGAATAGTTTTAGTGGTTATTTAAAACCTACTGACAATGTATAC | 3420 |
| gb:MT106053 | Organism:Severe | GTTCCAGACTATTGAAGTGAATAGTTTTAGTGGTTATTTAAAACCTACTGACAATGTATAC | 3382 |
| gb:MT019533 | Organism:Severe | GTTCCAGACTATTGAAGTGAATAGTTTTAGTGGTTATTTAAAACCTACTGACAATGTATAC | 3382 |
| gb:MT019531 | Organism:Severe | GTTCCAGACTATTGAAGTGAATAGTTTTAGTGGTTATTTAAAACCTACTGACAATGTATAC | 3382 |
| gb:MN996528 | Organism:Severe | GTTCCAGACTATTGAAGTGAATAGTTTTAGTGGTTATTTAAAACCTACTGACAATGTATAC | 3382 |
| gb:MN996530 | Organism:Severe | GTTCCAGACTATTGAAGTGAATAGTTTTAGTGGTTATTTAAAACCTACTGACAATGTATAC | 3368 |
| gb:MN908947 | Organism:Severe | GTTCCAGACTATTGAAGTGAATAGTTTTAGTGGTTATTTAAAACCTACTGACAATGTATAC | 3382 |
| gb:MT019532 | Organism:Severe | GTTCCAGACTATTGAAGTGAATAGTTTTAGTGGTTATTTAAAACCTACTGACAATGTATAC | 3382 |

\*\*\*\*\*

|             |                 |                                                                 |      |
|-------------|-----------------|-----------------------------------------------------------------|------|
| gb:MT020781 | Organism:Severe | ATTA AAAATGCAGACATTGTGGAAGAAGCTAAAAAGGTA AAAACCAACAGTGGTTGTTAAT | 3430 |
| gb:MT007544 | Organism:Severe | ATTA AAAATGCAGACATTGTGGAAGAAGCTAAAAAGGTA AAAACCAACAGTGGTTGTTAAT | 3442 |
| gb:MN994467 | Organism:Severe | ATTA AAAATGCAGACATTGTGGAAGAAGCTAAAAAGGTA AAAACCAACAGTGGTTGTTAAT | 3442 |
| gb:MT044257 | Organism:Severe | ATTA AAAATGCAGACATTGTGGAAGAAGCTAAAAAGGTA AAAACCAACAGTGGTTGTTAAT | 3442 |
| gb:MT106054 | Organism:Severe | ATTA AAAATGCAGACATTGTGGAAGAAGCTAAAAAGGTA AAAACCAACAGTGGTTGTTAAT | 3442 |
| gb:MT049951 | Organism:Severe | ATTA AAAATGCAGACATTGTGGAAGAAGCTAAAAAGGTA AAAACCAACAGTGGTTGTTAAT | 3442 |
| gb:MN975262 | Organism:Severe | ATTA AAAATGCAGACATTGTGGAAGAAGCTAAAAAGGTA AAAACCAACAGTGGTTGTTAAT | 3442 |
| gb:MT106052 | Organism:Severe | ATTA AAAATGCAGACATTGTGGAAGAAGCTAAAAAGGTA AAAACCAACAGTGGTTGTTAAT | 3442 |
| gb:LC522975 | Organism:Severe | ATTA AAAATGCAGACATTGTGGAAGAAGCTAAAAAGGTA AAAACCAACAGTGGTTGTTAAT | 3439 |
| gb:LC522973 | Organism:Severe | ATTA AAAATGCAGACATTGTGGAAGAAGCTAAAAAGGTA AAAACCAACAGTGGTTGTTAAT | 3439 |
| gb:LC522974 | Organism:Severe | ATTA AAAATGCAGACATTGTGGAAGAAGCTAAAAAGGTA AAAACCAACAGTGGTTGTTAAT | 3439 |
| gb:MN985325 | Organism:Severe | ATTA AAAATGCAGACATTGTGGAAGAAGCTAAAAAGGTA AAAACCAACAGTGGTTGTTAAT | 3442 |
| gb:MT020881 | Organism:Severe | ATTA AAAATGCAGACATTGTGGAAGAAGCTAAAAAGGTA AAAACCAACAGTGGTTGTTAAT | 3442 |
| gb:MT020880 | Organism:Severe | ATTA AAAATGCAGACATTGTGGAAGAAGCTAAAAAGGTA AAAACCAACAGTGGTTGTTAAT | 3442 |
| gb:MT066175 | Organism:Severe | ATTA AAAATGCAGACATTGTGGAAGAAGCTAAAAAGGTA AAAACCAACAGTGGTTGTTAAT | 3442 |
| gb:MN997409 | Organism:Severe | ATTA AAAATGCAGACATTGTGGAAGAAGCTAAAAAGGTA AAAACCAACAGTGGTTGTTAAT | 3442 |
| gb:MN938384 | Organism:Severe | ATTA AAAATGCAGACATTGTGGAAGAAGCTAAAAAGGTA AAAACCAACAGTGGTTGTTAAT | 3410 |
| gb:MT044258 | Organism:Severe | ATTA AAAATGCAGACATTGTGGAAGAAGCTAAAAAGGTA AAAACCAACAGTGGTTGTTAAT | 3418 |
| gb:MT039890 | Organism:Severe | ATTA AAAATGCAGACATTGTGGAAGAAGCTAAAAAGGTA AAAACCAACAGTGGTTGTTAAT | 3442 |
| gb:MN988713 | Organism:Severe | ATTA AAAATGCAGACATTGTGGAAGAAGCTAAAAAGGTA AAAACCAACAGTGGTTGTTAAT | 3442 |
| gb:LC521925 | Organism:Severe | ATTA AAAATGCAGACATTGTGGAAGAAGCTAAAAAGGTA AAAACCAACAGTGGTTGTTAAT | 3415 |
| gb:MT093571 | Organism:Severe | ATTA AAAATGCAGACATTGTGGAAGAAGCTAAAAAGGTA AAAACCAACAGTGGTTGTTAAT | 3442 |
| gb:MT039887 | Organism:Severe | ATTA AAAATGCAGACATTGTGGAAGAAGCTAAAAAGGTA AAAACCAACAGTGGTTGTTAAT | 3442 |
| gb:MT019530 | Organism:Severe | ATTA AAAATGCAGACATTGTGGAAGAAGCTAAAAAGGTA AAAACCAACAGTGGTTGTTAAT | 3442 |
| gb:MT039888 | Organism:Severe | ATTA AAAATGCAGACATTGTGGAAGAAGCTAAAAAGGTA AAAACCAACAGTGGTTGTTAAT | 3442 |
| gb:LC522972 | Organism:Severe | ATTA AAAATGCAGACATTGTGGAAGAAGCTAAAAAGGTA AAAACCAACAGTGGTTGTTAAT | 3439 |
| gb:MT027063 | Organism:Severe | ATTA AAAATGCAGACATTGTGGAAGAAGCTAAAAAGGTA AAAACCAACAGTGGTTGTTAAT | 3442 |
| gb:MT027062 | Organism:Severe | ATTA AAAATGCAGACATTGTGGAAGAAGCTAAAAAGGTA AAAACCAACAGTGGTTGTTAAT | 3442 |
| gb:MT019529 | Organism:Severe | ATTA AAAATGCAGACATTGTGGAAGAAGCTAAAAAGGTA AAAACCAACAGTGGTTGTTAAT | 3442 |
| gb:MN996529 | Organism:Severe | ATTA AAAATGCAGACATTGTGGAAGAAGCTAAAAAGGTA AAAACCAACAGTGGTTGTTAAT | 3430 |
| gb:MN996531 | Organism:Severe | ATTA AAAATGCAGACATTGTGGAAGAAGCTAAAAAGGTA AAAACCAACAGTGGTTGTTAAT | 3429 |
| gb:MT066176 | Organism:Severe | ATTA AAAATGCAGACATTGTGGAAGAAGCTAAAAAGGTA AAAACCAACAGTGGTTGTTAAT | 3442 |
| gb:MT027064 | Organism:Severe | ATTA AAAATGCAGACATTGTGGAAGAAGCTAAAAAGGTA AAAACCAACAGTGGTTGTTAAT | 3442 |
| gb:MN994468 | Organism:Severe | ATTA AAAATGCAGACATTGTGGAAGAAGCTAAAAAGGTA AAAACCAACAGTGGTTGTTAAT | 3442 |
| gb:MT072688 | Organism:Severe | ATTA AAAATGCAGACATTGTGGAAGAAGCTAAAAAGGTA AAAACCAACAGTGGTTGTTAAT | 3427 |
| gb:MN996527 | Organism:Severe | ATTA AAAATGCAGACATTGTGGAAGAAGCTAAAAAGGTA AAAACCAACAGTGGTTGTTAAT | 3409 |
| gb:MT093631 | Organism:Severe | ATTA AAAATGCAGACATTGTGGAAGAAGCTAAAAAGGTA AAAACCAACAGTGGTTGTTAAT | 3480 |
| gb:MT106053 | Organism:Severe | ATTA AAAATGCAGACATTGTGGAAGAAGCTAAAAAGGTA AAAACCAACAGTGGTTGTTAAT | 3442 |
| gb:MT019533 | Organism:Severe | ATTA AAAATGCAGACATTGTGGAAGAAGCTAAAAAGGTA AAAACCAACAGTGGTTGTTAAT | 3442 |

|             |                 |                                                               |      |
|-------------|-----------------|---------------------------------------------------------------|------|
| gb:MT019531 | Organism:Severe | ATTA AAAATGCAGACATTGTGGAAGAAGCTAAAAGGTA AAACCAACAGTGGTTGTTAAT | 3442 |
| gb:MN996528 | Organism:Severe | ATTA AAAATGCAGACATTGTGGAAGAAGCTAAAAGGTA AAACCAACAGTGGTTGTTAAT | 3442 |
| gb:MN996530 | Organism:Severe | ATTA AAAATGCAGACATTGTGGAAGAAGCTAAAAGGTA AAACCAACAGTGGTTGTTAAT | 3428 |
| gb:MN908947 | Organism:Severe | ATTA AAAATGCAGACATTGTGGAAGAAGCTAAAAGGTA AAACCAACAGTGGTTGTTAAT | 3442 |
| gb:MT019532 | Organism:Severe | ATTA AAAATGCAGACATTGTGGAAGAAGCTAAAAGGTA AAACCAACAGTGGTTGTTAAT | 3442 |

\*\*\*\*\*

|             |                 |                                                              |      |
|-------------|-----------------|--------------------------------------------------------------|------|
| gb:MT020781 | Organism:Severe | GCAGCCAATGTTTACCTTAAACATGGAGGAGGTGTTGCAGGAGCCTTAAATAAGGCTACT | 3490 |
| gb:MT007544 | Organism:Severe | GCAGCCAATGTTTACCTTAAACATGGAGGAGGTGTTGCAGGAGCCTTAAATAAGGCTACT | 3502 |
| gb:MN994467 | Organism:Severe | GCAGCCAATGTTTACCTTAAACATGGAGGAGGTGTTGCAGGAGCCTTAAATAAGGCTACT | 3502 |
| gb:MT044257 | Organism:Severe | GCAGCCAATGTTTACCTTAAACATGGAGGAGGTGTTGCAGGAGCCTTAAATAAGGCTACT | 3502 |
| gb:MT106054 | Organism:Severe | GCAGCCAATGTTTACCTTAAACATGGAGGAGGTGTTGCAGGAGCCTTAAATAAGGCTACT | 3502 |
| gb:MT049951 | Organism:Severe | GCAGCCAATGTTTACCTTAAACATGGAGGAGGTGTTGCAGGAGCCTTAAATAAGGCTACT | 3502 |
| gb:MN975262 | Organism:Severe | GCAGCCAATGTTTACCTTAAACATGGAGGAGGTGTTGCAGGAGCCTTAAATAAGGCTACT | 3502 |
| gb:MT106052 | Organism:Severe | GCAGCCAATGTTTACCTTAAACATGGAGGAGGTGTTGCAGGAGCCTTAAATAAGGCTACT | 3502 |
| gb:LC522975 | Organism:Severe | GCAGCCAATGTTTACCTTAAACATGGAGGAGGTGTTGCAGGAGCCTTAAATAAGGCTACT | 3499 |
| gb:LC522973 | Organism:Severe | GCAGCCAATGTTTACCTTAAACATGGAGGAGGTGTTGCAGGAGCCTTAAATAAGGCTACT | 3499 |
| gb:LC522974 | Organism:Severe | GCAGCCAATGTTTACCTTAAACATGGAGGAGGTGTTGCAGGAGCCTTAAATAAGGCTACT | 3499 |
| gb:MN985325 | Organism:Severe | GCAGCCAATGTTTACCTTAAACATGGAGGAGGTGTTGCAGGAGCCTTAAATAAGGCTACT | 3502 |
| gb:MT020881 | Organism:Severe | GCAGCCAATGTTTACCTTAAACATGGAGGAGGTGTTGCAGGAGCCTTAAATAAGGCTACT | 3502 |
| gb:MT020880 | Organism:Severe | GCAGCCAATGTTTACCTTAAACATGGAGGAGGTGTTGCAGGAGCCTTAAATAAGGCTACT | 3502 |
| gb:MT066175 | Organism:Severe | GCAGCCAATGTTTACCTTAAACATGGAGGAGGTGTTGCAGGAGCCTTAAATAAGGCTACT | 3502 |
| gb:MN997409 | Organism:Severe | GCAGCCAATGTTTACCTTAAACATGGAGGAGGTGTTGCAGGAGCCTTAAATAAGGCTACT | 3502 |
| gb:MN938384 | Organism:Severe | GCAGCCAATGTTTACCTTAAACATGGAGGAGGTGTTGCAGGAGCCTTAAATAAGGCTACT | 3470 |
| gb:MT044258 | Organism:Severe | GCAGCCAATGTTTACCTTAAACATGGAGGAGGTGTTGCAGGAGCCTTAAATAAGGCTACT | 3478 |
| gb:MT039890 | Organism:Severe | GCAGCCAATGTTTACCTTAAACATGGAGGAGGTGTTGCAGGAGCCTTAAATAAGGCTACT | 3502 |
| gb:MN988713 | Organism:Severe | GCAGCCAATGTTTACCTTAAACATGGAGGAGGTGTTGCAGGAGCCTTAAATAAGGCTACT | 3502 |
| gb:LC521925 | Organism:Severe | GCAGCCAATGTTTACCTTAAACATGGAGGAGGTGTTGCAGGAGCCTTAAATAAGGCTACT | 3475 |
| gb:MT093571 | Organism:Severe | GCAGCCAATGTTTACCTTAAACATGGAGGAGGTGTTGCAGGAGCCTTAAATAAGGCTACT | 3502 |
| gb:MT039887 | Organism:Severe | GCAGCCAATGTTTACCTTAAACATGGAGGAGGTGTTGCAGGAGCCTTAAATAAGGCTACT | 3502 |
| gb:MT019530 | Organism:Severe | GCAGCCAATGTTTACCTTAAACATGGAGGAGGTGTTGCAGGAGCCTTAAATAAGGCTACT | 3502 |
| gb:MT039888 | Organism:Severe | GCAGCCAATGTTTACCTTAAACATGGAGGAGGTGTTGCAGGAGCCTTAAATAAGGCTACT | 3502 |
| gb:LC522972 | Organism:Severe | GCAGCCAATGTTTACCTTAAACATGGAGGAGGTGTTGCAGGAGCCTTAAATAAGGCTACT | 3499 |
| gb:MT027063 | Organism:Severe | GCAGCCAATGTTTACCTTAAACATGGAGGAGGTGTTGCAGGAGCCTTAAATAAGGCTACT | 3502 |
| gb:MT027062 | Organism:Severe | GCAGCCAATGTTTACCTTAAACATGGAGGAGGTGTTGCAGGAGCCTTAAATAAGGCTACT | 3502 |
| gb:MT019529 | Organism:Severe | GCAGCCAATGTTTACCTTAAACATGGAGGAGGTGTTGCAGGAGCCTTAAATAAGGCTACT | 3502 |
| gb:MN996529 | Organism:Severe | GCAGCCAATGTTTACCTTAAACATGGAGGAGGTGTTGCAGGAGCCTTAAATAAGGCTACT | 3490 |
| gb:MN996531 | Organism:Severe | GCAGCCAATGTTTACCTTAAACATGGAGGAGGTGTTGCAGGAGCCTTAAATAAGGCTACT | 3489 |
| gb:MT066176 | Organism:Severe | GCAGCCAATGTTTACCTTAAACATGGAGGAGGTGTTGCAGGAGCCTTAAATAAGGCTACT | 3502 |
| gb:MT027064 | Organism:Severe | GCAGCCAATGTTTACCTTAAACATGGAGGAGGTGTTGCAGGAGCCTTAAATAAGGCTACT | 3502 |
| gb:MN994468 | Organism:Severe | GCAGCCAATGTTTACCTTAAACATGGAGGAGGTGTTGCAGGAGCCTTAAATAAGGCTACT | 3502 |
| gb:MT072688 | Organism:Severe | GCAGCCAATGTTTACCTTAAACATGGAGGAGGTGTTGCAGGAGCCTTAAATAAGGCTACT | 3487 |
| gb:MN996527 | Organism:Severe | GCAGCCAATGTTTACCTTAAACATGGAGGAGGTGTTGCAGGAGCCTTAAATAAGGCTACT | 3469 |
| gb:MT093631 | Organism:Severe | GCAGCCAATGTTTACCTTAAACATGGAGGAGGTGTTGCAGGAGCCTTAAATAAGGCTACT | 3540 |
| gb:MT106053 | Organism:Severe | GCAGCCAATGTTTACCTTAAACATGGAGGAGGTGTTGCAGGAGCCTTAAATAAGGCTACT | 3502 |
| gb:MT019533 | Organism:Severe | GCAGCCAATGTTTACCTTAAACATGGAGGAGGTGTTGCAGGAGCCTTAAATAAGGCTACT | 3502 |
| gb:MT019531 | Organism:Severe | GCAGCCAATGTTTACCTTAAACATGGAGGAGGTGTTGCAGGAGCCTTAAATAAGGCTACT | 3502 |
| gb:MN996528 | Organism:Severe | GCAGCCAATGTTTACCTTAAACATGGAGGAGGTGTTGCAGGAGCCTTAAATAAGGCTACT | 3502 |
| gb:MN996530 | Organism:Severe | GCAGCCAATGTTTACCTTAAACATGGAGGAGGTGTTGCAGGAGCCTTAAATAAGGCTACT | 3488 |
| gb:MN908947 | Organism:Severe | GCAGCCAATGTTTACCTTAAACATGGAGGAGGTGTTGCAGGAGCCTTAAATAAGGCTACT | 3502 |
| gb:MT019532 | Organism:Severe | GCAGCCAATGTTTACCTTAAACATGGAGGAGGTGTTGCAGGAGCCTTAAATAAGGCTACT | 3502 |

\*\*\*\*\*

|             |                 |                                                             |      |
|-------------|-----------------|-------------------------------------------------------------|------|
| gb:MT020781 | Organism:Severe | AACAATGCCATGCAAGTTGAATCTGATGATTACATAGCTACTAATGGACCCTTAAAGTG | 3550 |
| gb:MT007544 | Organism:Severe | AACAATGCCATGCAAGTTGAATCTGATGATTACATAGCTACTAATGGACCCTTAAAGTG | 3562 |
| gb:MN994467 | Organism:Severe | AACAATGCCATGCAAGTTGAATCTGATGATTACATAGCTACTAATGGACCCTTAAAGTG | 3562 |
| gb:MT044257 | Organism:Severe | AACAATGCCATGCAAGTTGAATCTGATGATTACATAGCTACTAATGGACCCTTAAAGTG | 3562 |
| gb:MT106054 | Organism:Severe | AACAATGCCATGCAAGTTGAATCTGATGATTACATAGCTACTAATGGACCCTTAAAGTG | 3562 |
| gb:MT049951 | Organism:Severe | AACAATGCCATGCAAGTTGAATCTGATGATTACATAGCTACTAATGGACCCTTAAAGTG | 3562 |
| gb:MN975262 | Organism:Severe | AACAATGCCATGCAAGTTGAATCTGATGATTACATAGCTACTAATGGACCCTTAAAGTG | 3562 |
| gb:MT106052 | Organism:Severe | AACAATGCCATGCAAGTTGAATCTGATGATTACATAGCTACTAATGGACCCTTAAAGTG | 3562 |
| gb:LC522975 | Organism:Severe | AACAATGCCATGCAAGTTGAATCTGATGATTACATAGCTACTAATGGACCCTTAAAGTG | 3559 |
| gb:LC522973 | Organism:Severe | AACAATGCCATGCAAGTTGAATCTGATGATTACATAGCTACTAATGGACCCTTAAAGTG | 3559 |
| gb:LC522974 | Organism:Severe | AACAATGCCATGCAAGTTGAATCTGATGATTACATAGCTACTAATGGACCCTTAAAGTG | 3559 |
| gb:MN985325 | Organism:Severe | AACAATGCCATGCAAGTTGAATCTGATGATTACATAGCTACTAATGGACCCTTAAAGTG | 3562 |



|             |                 |                                                              |      |
|-------------|-----------------|--------------------------------------------------------------|------|
| gb:MT066176 | Organism:Severe | GGTGGTAGTTGTGTTTTAAGCGGACACAATCTTGCTAAACACTGTCTTCATGTTGTCGGC | 3622 |
| gb:MT027064 | Organism:Severe | GGTGGTAGTTGTGTTTTAAGCGGACACAATCTTGCTAAACACTGTCTTCATGTTGTCGGC | 3622 |
| gb:MN994468 | Organism:Severe | GGTGGTAGTTGTGTTTTAAGCGGACACAATCTTGCTAAACACTGTCTTCATGTTGTCGGC | 3622 |
| gb:MT072688 | Organism:Severe | GGTGGTAGTTGTGTTTTAAGCGGACACAATCTTGCTAAACACTGTCTTCATGTTGTCGGC | 3607 |
| gb:MN996527 | Organism:Severe | GGTGGTAGTTGTGTTTTAAGCGGACACAATCTTGCTAAACACTGTCTTCATGTTGTCGGC | 3589 |
| gb:MT093631 | Organism:Severe | GGTGGTAGTTGTGTTTTAAGCGGACACAATCTTGCTAAACACTGTCTTCATGTTGTCGGC | 3660 |
| gb:MT106053 | Organism:Severe | GGTGGTAGTTGTGTTTTAAGCGGACACAATCTTGCTAAACACTGTCTTCATGTTGTCGGC | 3622 |
| gb:MT019533 | Organism:Severe | GGTGGTAGTTGTGTTTTAAGCGGACACAATCTTGCTAAACACTGTCTTCATGTTGTCGGC | 3622 |
| gb:MT019531 | Organism:Severe | GGTGGTAGTTGTGTTTTAAGCGGACACAATCTTGCTAAACACTGTCTTCATGTTGTCGGC | 3622 |
| gb:MN996528 | Organism:Severe | GGTGGTAGTTGTGTTTTAAGCGGACACAATCTTGCTAAACACTGTCTTCATGTTGTCGGC | 3622 |
| gb:MN996530 | Organism:Severe | GGTGGTAGTTGTGTTTTAAGCGGACACAATCTTGCTAAACACTGTCTTCATGTTGTCGGC | 3608 |
| gb:MN908947 | Organism:Severe | GGTGGTAGTTGTGTTTTAAGCGGACACAATCTTGCTAAACACTGTCTTCATGTTGTCGGC | 3622 |
| gb:MT019532 | Organism:Severe | GGTGGTAGTTGTGTTTTAAGCGGACACAATCTTGCTAAACACTGTCTTCATGTTGTCGGC | 3622 |

\*\*\*\*\*

|             |                 |                                                            |      |
|-------------|-----------------|------------------------------------------------------------|------|
| gb:MT020781 | Organism:Severe | CCAAATGTTAACAAAGGTGAAGACATTCAACTCTTAAGAGTGCCTATGAAAATTTAAT | 3670 |
| gb:MT007544 | Organism:Severe | CCAAATGTTAACAAAGGTGAAGACATTCAACTCTTAAGAGTGCCTATGAAAATTTAAT | 3682 |
| gb:MN994467 | Organism:Severe | CCAAATGTTAACAAAGGTGAAGACATTCAACTCTTAAGAGTGCCTATGAAAATTTAAT | 3682 |
| gb:MT044257 | Organism:Severe | CCAAATGTTAACAAAGGTGAAGACATTCAACTCTTAAGAGTGCCTATGAAAATTTAAT | 3682 |
| gb:MT106054 | Organism:Severe | CCAAATGTTAACAAAGGTGAAGACATTCAACTCTTAAGAGTGCCTATGAAAATTTAAT | 3682 |
| gb:MT049951 | Organism:Severe | CCAAATGTTAACAAAGGTGAAGACATTCAACTCTTAAGAGTGCCTATGAAAATTTAAT | 3682 |
| gb:MN975262 | Organism:Severe | CCAAATGTTAACAAAGGTGAAGACATTCAACTCTTAAGAGTGCCTATGAAAATTTAAT | 3682 |
| gb:MT106052 | Organism:Severe | CCAAATGTTAACAAAGGTGAAGACATTCAACTCTTAAGAGTGCCTATGAAAATTTAAT | 3682 |
| gb:LC522975 | Organism:Severe | CCAAATGTTAACAAAGGTGAAGACATTCAACTCTTAAGAGTGCCTATGAAAATTTAAT | 3679 |
| gb:LC522973 | Organism:Severe | CCAAATGTTAACAAAGGTGAAGACATTCAACTCTTAAGAGTGCCTATGAAAATTTAAT | 3679 |
| gb:LC522974 | Organism:Severe | CCAAATGTTAACAAAGGTGAAGACATTCAACTCTTAAGAGTGCCTATGAAAATTTAAT | 3679 |
| gb:MN985325 | Organism:Severe | CCAAATGTTAACAAAGGTGAAGACATTCAACTCTTAAGAGTGCCTATGAAAATTTAAT | 3682 |
| gb:MT020881 | Organism:Severe | CCAAATGTTAACAAAGGTGAAGACATTCAACTCTTAAGAGTGCCTATGAAAATTTAAT | 3682 |
| gb:MT020880 | Organism:Severe | CCAAATGTTAACAAAGGTGAAGACATTCAACTCTTAAGAGTGCCTATGAAAATTTAAT | 3682 |
| gb:MT066175 | Organism:Severe | CCAAATGTTAACAAAGGTGAAGACATTCAACTCTTAAGAGTGCCTATGAAAATTTAAT | 3682 |
| gb:MN997409 | Organism:Severe | CCAAATGTTAACAAAGGTGAAGACATTCAACTCTTAAGAGTGCCTATGAAAATTTAAT | 3682 |
| gb:MN938384 | Organism:Severe | CCAAATGTTAACAAAGGTGAAGACATTCAACTCTTAAGAGTGCCTATGAAAATTTAAT | 3650 |
| gb:MT044258 | Organism:Severe | CCAAATGTTAACAAAGGTGAAGACATTCAACTCTTAAGAGTGCCTATGAAAATTTAAT | 3658 |
| gb:MT039890 | Organism:Severe | CCAAATGTTAACAAAGGTGAAGACATTCAACTCTTAAGAGTGCCTATGAAAATTTAAT | 3682 |
| gb:MN988713 | Organism:Severe | CCAAATGTTAACAAAGGTGAAGACATTCAACTCTTAAGAGTGCCTATGAAAATTTAAT | 3682 |
| gb:LC521925 | Organism:Severe | CCAAATGTTAACAAAGGTGAAGACATTCAACTCTTAAGAGTGCCTATGAAAATTTAAT | 3655 |
| gb:MT093571 | Organism:Severe | CCAAATGTTAACAAAGGTGAAGACATTCAACTCTTAAGAGTGCCTATGAAAATTTAAT | 3682 |
| gb:MT039887 | Organism:Severe | CCAAATGTTAACAAAGGTGAAGACATTCAACTCTTAAGAGTGCCTATGAAAATTTAAT | 3682 |
| gb:MT019530 | Organism:Severe | CCAAATGTTAACAAAGGTGAAGACATTCAACTCTTAAGAGTGCCTATGAAAATTTAAT | 3682 |
| gb:MT039888 | Organism:Severe | CCAAATGTTAACAAAGGTGAAGACATTCAACTCTTAAGAGTGCCTATGAAAATTTAAT | 3682 |
| gb:LC522972 | Organism:Severe | CCAAATGTTAACAAAGGTGAAGACATTCAACTCTTAAGAGTGCCTATGAAAATTTAAT | 3679 |
| gb:MT027063 | Organism:Severe | CCAAATGTTAACAAAGGTGAAGACATTCAACTCTTAAGAGTGCCTATGAAAATTTAAT | 3682 |
| gb:MT027062 | Organism:Severe | CCAAATGTTAACAAAGGTGAAGACATTCAACTCTTAAGAGTGCCTATGAAAATTTAAT | 3682 |
| gb:MT019529 | Organism:Severe | CCAAATGTTAACAAAGGTGAAGACATTCAACTCTTAAGAGTGCCTATGAAAATTTAAT | 3682 |
| gb:MN996529 | Organism:Severe | CCAAATGTTAACAAAGGTGAAGACATTCAACTCTTAAGAGTGCCTATGAAAATTTAAT | 3670 |
| gb:MN996531 | Organism:Severe | CCAAATGTTAACAAAGGTGAAGACATTCAACTCTTAAGAGTGCCTATGAAAATTTAAT | 3669 |
| gb:MT066176 | Organism:Severe | CCAAATGTTAACAAAGGTGAAGACATTCAACTCTTAAGAGTGCCTATGAAAATTTAAT | 3682 |
| gb:MT027064 | Organism:Severe | CCAAATGTTAACAAAGGTGAAGACATTCAACTCTTAAGAGTGCCTATGAAAATTTAAT | 3682 |
| gb:MN994468 | Organism:Severe | CCAAATGTTAACAAAGGTGAAGACATTCAACTCTTAAGAGTGCCTATGAAAATTTAAT | 3682 |
| gb:MT072688 | Organism:Severe | CCAAATGTTAACAAAGGTGAAGACATTCAACTCTTAAGAGTGCCTATGAAAATTTAAT | 3667 |
| gb:MN996527 | Organism:Severe | CCAAATGTTAACAAAGGTGAAGACATTCAACTCTTAAGAGTGCCTATGAAAATTTAAT | 3649 |
| gb:MT093631 | Organism:Severe | CCAAATGTTAACAAAGGTGAAGACATTCAACTCTTAAGAGTGCCTATGAAAATTTAAT | 3720 |
| gb:MT106053 | Organism:Severe | CCAAATGTTAACAAAGGTGAAGACATTCAACTCTTAAGAGTGCCTATGAAAATTTAAT | 3682 |
| gb:MT019533 | Organism:Severe | CCAAATGTTAACAAAGGTGAAGACATTCAACTCTTAAGAGTGCCTATGAAAATTTAAT | 3682 |
| gb:MT019531 | Organism:Severe | CCAAATGTTAACAAAGGTGAAGACATTCAACTCTTAAGAGTGCCTATGAAAATTTAAT | 3682 |
| gb:MN996528 | Organism:Severe | CCAAATGTTAACAAAGGTGAAGACATTCAACTCTTAAGAGTGCCTATGAAAATTTAAT | 3682 |
| gb:MN996530 | Organism:Severe | CCAAATGTTAACAAAGGTGAAGACATTCAACTCTTAAGAGTGCCTATGAAAATTTAAT | 3668 |
| gb:MN908947 | Organism:Severe | CCAAATGTTAACAAAGGTGAAGACATTCAACTCTTAAGAGTGCCTATGAAAATTTAAT | 3682 |
| gb:MT019532 | Organism:Severe | CCAAATGTTAACAAAGGTGAAGACATTCAACTCTTAAGAGTGCCTATGAAAATTTAAT | 3682 |

\*\*\*\*\*

|             |                 |                                                             |      |
|-------------|-----------------|-------------------------------------------------------------|------|
| gb:MT020781 | Organism:Severe | CAGCACGAAGTTCTACTTGACCATTATTATCAGCTGGTATTTTTGGTGCTGACCCTATA | 3730 |
| gb:MT007544 | Organism:Severe | CAGCACGAAGTTCTACTTGACCATTATTATCAGCTGGTATTTTTGGTGCTGACCCTATA | 3742 |
| gb:MN994467 | Organism:Severe | CAGCACGAAGTTCTACTTGACCATTATTATCAGCTGGTATTTTTGGTGCTGACCCTATA | 3742 |
| gb:MT044257 | Organism:Severe | CAGCACGAAGTTCTACTTGACCATTATTATCAGCTGGTATTTTTGGTGCTGACCCTATA | 3742 |



|             |                 |                                                               |      |
|-------------|-----------------|---------------------------------------------------------------|------|
| gb:MT019530 | Organism:Severe | CATTCTTTAAGAGTTTGTGTAGATACTGTTTCGCACAAATGTCTACTTAGCTGTCTTTGAT | 3802 |
| gb:MT039888 | Organism:Severe | CATTCTTTAAGAGTTTGTGTAGATACTGTTTCGCACAAATGTCTACTTAGCTGTCTTTGAT | 3802 |
| gb:LC522972 | Organism:Severe | CATTCTTTAAGAGTTTGTGTAGATACTGTTTCGCACAAATGTCTACTTAGCTGTCTTTGAT | 3799 |
| gb:MT027063 | Organism:Severe | CATTCTTTAAGAGTTTGTGTAGATACTGTTTCGCACAAATGTCTACTTAGCTGTCTTTGAT | 3802 |
| gb:MT027062 | Organism:Severe | CATTCTTTAAGAGTTTGTGTAGATACTGTTTCGCACAAATGTCTACTTAGCTGTCTTTGAT | 3802 |
| gb:MT019529 | Organism:Severe | CATTCTTTAAGAGTTTGTGTAGATACTGTTTCGCACGAATGTCTACTTAGCTGTCTTTGAT | 3802 |
| gb:MN996529 | Organism:Severe | CATTCTTTAAGAGTTTGTGTAGATACTGTTTCGCACAAATGTCTACTTAGCTGTCTTTGAT | 3790 |
| gb:MN996531 | Organism:Severe | CATTCTTTAAGAGTTTGTGTAGATACTGTTTCGCACAAATGTCTACTTAGCTGTCTTTGAT | 3789 |
| gb:MT066176 | Organism:Severe | CATTCTTTAAGAGTTTGTGTAGATACTGTTTCGCACAAATGTCTACTTAGCTGTCTTTGAT | 3802 |
| gb:MT027064 | Organism:Severe | CATTCTTTAAGAGTTTGTGTAGATACTGTTTCGCACAAATGTCTACTTAGCTGTCTTTGAT | 3802 |
| gb:MN994468 | Organism:Severe | CATTCTTTAAGAGTTTGTGTAGATACTGTTTCGCACAAATGTCTACTTAGCTGTCTTTGAT | 3802 |
| gb:MT072688 | Organism:Severe | CATTCTTTAAGAGTTTGTGTAGATACTGTTTCGCACAAATGTCTACTTAGCTGTCTTTGAT | 3787 |
| gb:MN996527 | Organism:Severe | CATTCTTTAAGAGTTTGTGTAGATACTGTTTCGCACAAATGTCTACTTAGCTGTCTTTGAT | 3769 |
| gb:MT093631 | Organism:Severe | CATTCTTTAAGAGTTTGTGTAGATACTGTTTCGCACAAATGTCTACTTAGCTGTCTTTGAT | 3840 |
| gb:MT106053 | Organism:Severe | CATTCTTTAAGAGTTTGTGTAGATACTGTTTCGCACAAATGTCTACTTAGCTGTCTTTGAT | 3802 |
| gb:MT019533 | Organism:Severe | CATTCTTTAAGAGTTTGTGTAGATACTGTTTCGCACAAATGTCTACTTAGCTGTCTTTGAT | 3802 |
| gb:MT019531 | Organism:Severe | CATTCTTTAAGAGTTTGTGTAGATACTGTTTCGCACAAATGTCTACTTAGCTGTCTTTGAT | 3802 |
| gb:MN996528 | Organism:Severe | CATTCTTTAAGAGTTTGTGTAGATACTGTTTCGCACAAATGTCTACTTAGCTGTCTTTGAT | 3802 |
| gb:MN996530 | Organism:Severe | CATTCTTTAAGAGTTTGTGTAGATACTGTTTCGCACAAATGTCTACTTAGCTGTCTTTGAT | 3788 |
| gb:MN908947 | Organism:Severe | CATTCTTTAAGAGTTTGTGTAGATACTGTTTCGCACAAATGTCTACTTAGCTGTCTTTGAT | 3802 |
| gb:MT019532 | Organism:Severe | CATTCTTTAAGAGTTTGTGTAGATACTGTTTCGCACAAATGTCTACTTAGCTGTCTTTGAT | 3802 |

\*\*\*\*\*

|             |                 |                                                              |      |
|-------------|-----------------|--------------------------------------------------------------|------|
| gb:MT020781 | Organism:Severe | AAAAATCTCTATGACAAACTTGTTTCAAGCTTTTTGGAAATGAAGAGTGAAAAGCAAGTT | 3850 |
| gb:MT007544 | Organism:Severe | AAAAATCTCTATGACAAACTTGTTTCAAGCTTTTTGGAAATGAAGAGTGAAAAGCAAGTT | 3862 |
| gb:MN994467 | Organism:Severe | AAAAATCTCTATGACAAACTTGTTTCAAGCTTTTTGGAAATGAAGAGTGAAAAGCAAGTT | 3862 |
| gb:MT044257 | Organism:Severe | AAAAATCTCTATGACAAACTTGTTTCAAGCTTTTTGGAAATGAAGAGTGAAAAGCAAGTT | 3862 |
| gb:MT106054 | Organism:Severe | AAAAATCTCTATGACAAACTTGTTTCAAGCTTTTTGGAAATGAAGAGTGAAAAGCAAGTT | 3862 |
| gb:MT049951 | Organism:Severe | AAAAATCTCTATGACAAACTTGTTTCAAGCTTTTTGGAAATGAAGAGTGAAAAGCAAGTT | 3862 |
| gb:MN975262 | Organism:Severe | AAAAATCTCTATGACAAACTTGTTTCAAGCTTTTTGGAAATGAAGAGTGAAAAGCAAGTT | 3862 |
| gb:MT106052 | Organism:Severe | AAAAATCTCTATGACAAACTTGTTTCAAGCTTTTTGGAAATGAAGAGTGAAAAGCAAGTT | 3862 |
| gb:LC522975 | Organism:Severe | AAAAATCTCTATGACAAACTTGTTTCAAGCTTTTTGGAAATGAAGAGTGAAAAGCAAGTT | 3859 |
| gb:LC522973 | Organism:Severe | AAAAATCTCTATGACAAACTTGTTTCAAGCTTTTTGGAAATGAAGAGTGAAAAGCAAGTT | 3859 |
| gb:LC522974 | Organism:Severe | AAAAATCTCTATGACAAACTTGTTTCAAGCTTTTTGGAAATGAAGAGTGAAAAGCAAGTT | 3859 |
| gb:MN985325 | Organism:Severe | AAAAATCTCTATGACAAACTTGTTTCAAGCTTTTTGGAAATGAAGAGTGAAAAGCAAGTT | 3862 |
| gb:MT020881 | Organism:Severe | AAAAATCTCTATGACAAACTTGTTTCAAGCTTTTTGGAAATGAAGAGTGAAAAGCAAGTT | 3862 |
| gb:MT020880 | Organism:Severe | AAAAATCTCTATGACAAACTTGTTTCAAGCTTTTTGGAAATGAAGAGTGAAAAGCAAGTT | 3862 |
| gb:MT066175 | Organism:Severe | AAAAATCTCTATGACAAACTTGTTTCAAGCTTTTTGGAAATGAAGAGTGAAAAGCAAGTT | 3862 |
| gb:MN997409 | Organism:Severe | AAAAATCTCTATGACAAACTTGTTTCAAGCTTTTTGGAAATGAAGAGTGAAAAGCAAGTT | 3862 |
| gb:MN938384 | Organism:Severe | AAAAATCTCTATGACAAACTTGTTTCAAGCTTTTTGGAAATGAAGAGTGAAAAGCAAGTT | 3830 |
| gb:MT044258 | Organism:Severe | AAAAATCTCTATGACAAACTTGTTTCAAGCTTTTTGGAAATGAAGAGTGAAAAGCAAGTT | 3838 |
| gb:MT039890 | Organism:Severe | AAAAATCTCTATGACAAACTTGTTTCAAGCTTTTTGGAAATGAAGAGTGAAAAGCAAGTT | 3862 |
| gb:MN988713 | Organism:Severe | AAAAATCTCTATGACAAACTTGTTTCAAGCTTTTTGGAAATGAAGAGTGAAAAGCAAGTT | 3862 |
| gb:LC521925 | Organism:Severe | AAAAATCTCTATGACAAACTTGTTTCAAGCTTTTTGGAAATGAAGAGTGAAAAGCAAGTT | 3835 |
| gb:MT093571 | Organism:Severe | AAAAATCTCTATGACAAACTTGTTTCAAGCTTTTTGGAAATGAAGAGTGAAAAGCAAGTT | 3862 |
| gb:MT039887 | Organism:Severe | AAAAATCTCTATGACAAACTTGTTTCAAGCTTTTTGGAAATGAAGAGTGAAAAGCAAGTT | 3862 |
| gb:MT019530 | Organism:Severe | AAAAATCTCTATGACAAACTTGTTTCAAGCTTTTTGGAAATGAAGAGTGAAAAGCAAGTT | 3862 |
| gb:MT039888 | Organism:Severe | AAAAATCTCTATGACAAACTTGTTTCAAGCTTTTTGGAAATGAAGAGTGAAAAGCAAGTT | 3862 |
| gb:LC522972 | Organism:Severe | AAAAATCTCTATGACAAACTTGTTTCAAGCTTTTTGGAAATGAAGAGTGAAAAGCAAGTT | 3859 |
| gb:MT027063 | Organism:Severe | AAAAATCTCTATGACAAACTTGTTTCAAGCTTTTTGGAAATGAAGAGTGAAAAGCAAGTT | 3862 |
| gb:MT027062 | Organism:Severe | AAAAATCTCTATGACAAACTTGTTTCAAGCTTTTTGGAAATGAAGAGTGAAAAGCAAGTT | 3862 |
| gb:MT019529 | Organism:Severe | AAAAATCTCTATGACAAACTTGTTTCAAGCTTTTTGGAAATGAAGAGTGAAAAGCAAGTT | 3862 |
| gb:MN996529 | Organism:Severe | AAAAATCTCTATGACAAACTTGTTTCAAGCTTTTTGGAAATGAAGAGTGAAAAGCAAGTT | 3850 |
| gb:MN996531 | Organism:Severe | AAAAATCTCTATGACAAACTTGTTTCAAGCTTTTTGGAAATGAAGAGTGAAAAGCAAGTT | 3849 |
| gb:MT066176 | Organism:Severe | AAAAATCTCTATGACAAACTTGTTTCAAGCTTTTTGGAAATGAAGAGTGAAAAGCAAGTT | 3862 |
| gb:MT027064 | Organism:Severe | AAAAATCTCTATGACAAACTTGTTTCAAGCTTTTTGGAAATGAAGAGTGAAAAGCAAGTT | 3862 |
| gb:MN994468 | Organism:Severe | AAAAATCTCTATGACAAACTTGTTTCAAGCTTTTTGGAAATGAAGAGTGAAAAGCAAGTT | 3862 |
| gb:MT072688 | Organism:Severe | AAAAATCTCTATGACAAACTTGTTTCAAGCTTTTTGGAAATGAAGAGTGAAAAGCAAGTT | 3847 |
| gb:MN996527 | Organism:Severe | AAAAATCTCTATGACAAACTTGTTTCAAGCTTTTTGGAAATGAAGAGTGAAAAGCAAGTT | 3829 |
| gb:MT093631 | Organism:Severe | AAAAATCTCTATGACAAACTTGTTTCAAGCTTTTTGGAAATGAAGAGTGAAAAGCAAGTT | 3900 |
| gb:MT106053 | Organism:Severe | AAAAATCTCTATGACAAACTTGTTTCAAGCTTTTTGGAAATGAAGAGTGAAAAGCAAGTT | 3862 |
| gb:MT019533 | Organism:Severe | AAAAATCTCTATGACAAACTTGTTTCAAGCTTTTTGGAAATGAAGAGTGAAAAGCAAGTT | 3862 |
| gb:MT019531 | Organism:Severe | AAAAATCTCTATGACAAACTTGTTTCAAGCTTTTTGGAAATGAAGAGTGAAAAGCAAGTT | 3862 |
| gb:MN996528 | Organism:Severe | AAAAATCTCTATGACAAACTTGTTTCAAGCTTTTTGGAAATGAAGAGTGAAAAGCAAGTT | 3862 |
| gb:MN996530 | Organism:Severe | AAAAATCTCTATGACAAACTTGTTTCAAGCTTTTTGGAAATGAAGAGTGAAAAGCAAGTT | 3848 |

|             |                 |                           |                         |              |      |
|-------------|-----------------|---------------------------|-------------------------|--------------|------|
| gb:MN908947 | Organism:Severe | AAAAATCTCTATGACAAACTTGTTC | CAAGCTTTTTGGAAATGAAGAGT | GAAAAGCAAGTT | 3862 |
| gb:MT019532 | Organism:Severe | AAAAATCTCTATGACAAACTTGTTC | CAAGCTTTTTGGAAATGAAGAGT | GAAAAGCAAGTT | 3862 |

\*\*\*\*\*

|             |                 |                                                              |      |
|-------------|-----------------|--------------------------------------------------------------|------|
| gb:MT020781 | Organism:Severe | GAACAAAAGATCGCTGAGATTCCTAAAGAGGAAGTTAAGCCATTTATAACTGAAAGTAAA | 3910 |
| gb:MT007544 | Organism:Severe | GAACAAAAGATCGCTGAGATTCCTAAAGAGGAAGTTAAGCCATTTATAACTGAAAGTAAA | 3922 |
| gb:MN994467 | Organism:Severe | GAACAAAAGATCGCTGAGATTCCTAAAGAGGAAGTTAAGCCATTTATAACTGAAAGTAAA | 3922 |
| gb:MT044257 | Organism:Severe | GAACAAAAGATCGCTGAGATTCCTAAAGAGGAAGTTAAGCCATTTATAACTGAAAGTAAA | 3922 |
| gb:MT106054 | Organism:Severe | GAACAAAAGATCGCTGAGATTCCTAAAGAGGAAGTTAAGCCATTTATAACTGAAAGTAAA | 3922 |
| gb:MT049951 | Organism:Severe | GAACAAAAGATCGCTGAGATTCCTAAAGAGGAAGTTAAGCCATTTATAACTGAAAGTAAA | 3922 |
| gb:MN975262 | Organism:Severe | GAACAAAAGATCGCTGAGATTCCTAAAGAGGAAGTTAAGCCATTTATAACTGAAAGTAAA | 3922 |
| gb:MT106052 | Organism:Severe | GAACAAAAGATCGCTGAGATTCCTAAAGAGGAAGTTAAGCCATTTATAACTGAAAGTAAA | 3922 |
| gb:LC522975 | Organism:Severe | GAACAAAAGATCGCTGAGATTCCTAAAGAGGAAGTTAAGCCATTTATAACTGAAAGTAAA | 3919 |
| gb:LC522973 | Organism:Severe | GAACAAAAGATCGCTGAGATTCCTAAAGAGGAAGTTAAGCCATTTATAACTGAAAGTAAA | 3919 |
| gb:LC522974 | Organism:Severe | GAACAAAAGATCGCTGAGATTCCTAAAGAGGAAGTTAAGCCATTTATAACTGAAAGTAAA | 3919 |
| gb:MN985325 | Organism:Severe | GAACAAAAGATCGCTGAGATTCCTAAAGAGGAAGTTAAGCCATTTATAACTGAAAGTAAA | 3922 |
| gb:MT020881 | Organism:Severe | GAACAAAAGATCGCTGAGATTCCTAAAGAGGAAGTTAAGCCATTTATAACTGAAAGTAAA | 3922 |
| gb:MT020880 | Organism:Severe | GAACAAAAGATCGCTGAGATTCCTAAAGAGGAAGTTAAGCCATTTATAACTGAAAGTAAA | 3922 |
| gb:MT066175 | Organism:Severe | GAACAAAAGATCGCTGAGATTCCTAAAGAGGAAGTTAAGCCATTTATAACTGAAAGTAAA | 3922 |
| gb:MN997409 | Organism:Severe | GAACAAAAGATCGCTGAGATTCCTAAAGAGGAAGTTAAGCCATTTATAACTGAAAGTAAA | 3922 |
| gb:MN938384 | Organism:Severe | GAACAAAAGATCGCTGAGATTCCTAAAGAGGAAGTTAAGCCATTTATAACTGAAAGTAAA | 3890 |
| gb:MT044258 | Organism:Severe | GAACAAAAGATCGCTGAGATTCCTAAAGAGGAAGTTAAGCCATTTATAACTGAAAGTAAA | 3898 |
| gb:MT039890 | Organism:Severe | GAACAAAAGATCGCTGAGATTCCTAAAGAGGAAGTTAAGCCATTTATAACTGAAAGTAAA | 3922 |
| gb:MN988713 | Organism:Severe | GAACAAAAGATCGCTGAGATTCCTAAAGAGGAAGTTAAGCCATTTATAACTGAAAGTAAA | 3922 |
| gb:LC521925 | Organism:Severe | GAACAAAAGATCGCTGAGATTCCTAAAGAGGAAGTTAAGCCATTTATAACTGAAAGTAAA | 3895 |
| gb:MT093571 | Organism:Severe | GAACAAAAGATCGCTGAGATTCCTAAAGAGGAAGTTAAGCCATTTATAACTGAAAGTAAA | 3922 |
| gb:MT039887 | Organism:Severe | GAACAAAAGATCGCTGAGATTCCTAAAGAGGAAGTTAAGCCATTTATAACTGAAAGTAAA | 3922 |
| gb:MT019530 | Organism:Severe | GAACAAAAGATCGCTGAGATTCCTAAAGAGGAAGTTAAGCCATTTATAACTGAAAGTAAA | 3922 |
| gb:MT039888 | Organism:Severe | GAACAAAAGATCGCTGAGATTCCTAAAGAGGAAGTTAAGCCATTTATAACTGAAAGTAAA | 3922 |
| gb:LC522972 | Organism:Severe | GAACAAAAGATCGCTGAGATTCCTAAAGAGGAAGTTAAGCCATTTATAACTGAAAGTAAA | 3919 |
| gb:MT027063 | Organism:Severe | GAACAAAAGATCGCTGAGATTCCTAAAGAGGAAGTTAAGCCATTTATAACTGAAAGTAAA | 3922 |
| gb:MT027062 | Organism:Severe | GAACAAAAGATCGCTGAGATTCCTAAAGAGGAAGTTAAGCCATTTATAACTGAAAGTAAA | 3922 |
| gb:MT019529 | Organism:Severe | GAACAAAAGATCGCTGAGATTCCTAAAGAGGAAGTTAAGCCATTTATAACTGAAAGTAAA | 3922 |
| gb:MN996529 | Organism:Severe | GAACAAAAGATCGCTGAGATTCCTAAAGAGGAAGTTAAGCCATTTATAACTGAAAGTAAA | 3910 |
| gb:MN996531 | Organism:Severe | GAACAAAAGATCGCTGAGATTCCTAAAGAGGAAGTTAAGCCATTTATAACTGAAAGTAAA | 3909 |
| gb:MT066176 | Organism:Severe | GAACAAAAGATCGCTGAGATTCCTAAAGAGGAAGTTAAGCCATTTATAACTGAAAGTAAA | 3922 |
| gb:MT027064 | Organism:Severe | GAACAAAAGATCGCTGAGATTCCTAAAGAGGAAGTTAAGCCATTTATAACTGAAAGTAAA | 3922 |
| gb:MN994468 | Organism:Severe | GAACAAAAGATCGCTGAGATTCCTAAAGAGGAAGTTAAGCCATTTATAACTGAAAGTAAA | 3922 |
| gb:MT072688 | Organism:Severe | GAACAAAAGATCGCTGAGATTCCTAAAGAGGAAGTTAAGCCATTTATAACTGAAAGTAAA | 3907 |
| gb:MN996527 | Organism:Severe | GAACAAAAGATCGCTGAGATTCCTAAAGAGGAAGTTAAGCCATTTATAACTGAAAGTAAA | 3889 |
| gb:MT093631 | Organism:Severe | GAACAAAAGATCGCTGAGATTCCTAAAGAGGAAGTTAAGCCATTTATAACTGAAAGTAAA | 3960 |
| gb:MT106053 | Organism:Severe | GAACAAAAGATCGCTGAGATTCCTAAAGAGGAAGTTAAGCCATTTATAACTGAAAGTAAA | 3922 |
| gb:MT019533 | Organism:Severe | GAACAAAAGATCGCTGAGATTCCTAAAGAGGAAGTTAAGCCATTTATAACTGAAAGTAAA | 3922 |
| gb:MT019531 | Organism:Severe | GAACAAAAGATCGCTGAGATTCCTAAAGAGGAAGTTAAGCCATTTATAACTGAAAGTAAA | 3922 |
| gb:MN996528 | Organism:Severe | GAACAAAAGATCGCTGAGATTCCTAAAGAGGAAGTTAAGCCATTTATAACTGAAAGTAAA | 3922 |
| gb:MN996530 | Organism:Severe | GAACAAAAGATCGCTGAGATTCCTAAAGAGGAAGTTAAGCCATTTATAACTGAAAGTAAA | 3908 |
| gb:MN908947 | Organism:Severe | GAACAAAAGATCGCTGAGATTCCTAAAGAGGAAGTTAAGCCATTTATAACTGAAAGTAAA | 3922 |
| gb:MT019532 | Organism:Severe | GAACAAAAGATCGCTGAGATTCCTAAAGAGGAAGTTAAGCCATTTATAACTGAAAGTAAA | 3922 |

\*\*\*\*\*

|             |                 |                                                              |      |
|-------------|-----------------|--------------------------------------------------------------|------|
| gb:MT020781 | Organism:Severe | CCTTCAGTTGAACAGAGAAAACAAGATGATAAGAAAATCAAAGCTTGTGTTGAAGAAGTT | 3970 |
| gb:MT007544 | Organism:Severe | CCTTCAGTTGAACAGAGAAAACAAGATGATAAGAAAATCAAAGCTTGTGTTGAAGAAGTT | 3982 |
| gb:MN994467 | Organism:Severe | CCTTCAGTTGAACAGAGAAAACAAGATGATAAGAAAATCAAAGCTTGTGTTGAAGAAGTT | 3982 |
| gb:MT044257 | Organism:Severe | CCTTCAGTTGAACAGAGAAAACAAGATGATAAGAAAATCAAAGCTTGTGTTGAAGAAGTT | 3982 |
| gb:MT106054 | Organism:Severe | CCTTCAGTTGAACAGAGAAAACAAGATGATAAGAAAATCAAAGCTTGTGTTGAAGAAGTT | 3982 |
| gb:MT049951 | Organism:Severe | CCTTCAGTTGAACAGAGAAAACAAGATGATAAGAAAATCAAAGCTTGTGTTGAAGAAGTT | 3982 |
| gb:MN975262 | Organism:Severe | CCTTCAGTTGAACAGAGAAAACAAGATGATAAGAAAATCAAAGCTTGTGTTGAAGAAGTT | 3982 |
| gb:MT106052 | Organism:Severe | CCTTCAGTTGAACAGAGAAAACAAGATGATAAGAAAATCAAAGCTTGTGTTGAAGAAGTT | 3982 |
| gb:LC522975 | Organism:Severe | CCTTCAGTTGAACAGAGAAAACAAGATGATAAGAAAATCAAAGCTTGTGTTGAAGAAGTT | 3979 |
| gb:LC522973 | Organism:Severe | CCTTCAGTTGAACAGAGAAAACAAGATGATAAGAAAATCAAAGCTTGTGTTGAAGAAGTT | 3979 |
| gb:LC522974 | Organism:Severe | CCTTCAGTTGAACAGAGAAAACAAGATGATAAGAAAATCAAAGCTTGTGTTGAAGAAGTT | 3979 |
| gb:MN985325 | Organism:Severe | CCTTCAGTTGAACAGAGAAAACAAGATGATAAGAAAATCAAAGCTTGTGTTGAAGAAGTT | 3982 |
| gb:MT020881 | Organism:Severe | CCTTCAGTTGAACAGAGAAAACAAGATGATAAGAAAATCAAAGCTTGTGTTGAAGAAGTT | 3982 |
| gb:MT020880 | Organism:Severe | CCTTCAGTTGAACAGAGAAAACAAGATGATAAGAAAATCAAAGCTTGTGTTGAAGAAGTT | 3982 |
| gb:MT066175 | Organism:Severe | CCTTCAGTTGAACAGAGAAAACAAGATGATAAGAAAATCAAAGCTTGTGTTGAAGAAGTT | 3982 |





|             |                 |                                                             |      |
|-------------|-----------------|-------------------------------------------------------------|------|
| gb:MT072688 | Organism:Severe | ACAACAACCTCTGGAAGAACTAAGTTCTCACAGAAAACCTGTTACTTTATATTGACATT | 4027 |
| gb:MN996527 | Organism:Severe | ACAACAACCTCTGGAAGAACTAAGTTCTCACAGAAAACCTGTTACTTTATATTGACATT | 4009 |
| gb:MT093631 | Organism:Severe | ACAACAACCTCTGGAAGAACTAAGTTCTCACAGAAAACCTGTTACTTTATATTGACATT | 4080 |
| gb:MT106053 | Organism:Severe | ACAACAACCTCTGGAAGAACTAAGTTCTCACAGAAAACCTGTTACTTTATATTGACATT | 4042 |
| gb:MT019533 | Organism:Severe | ACAACAACCTCTGGAAGAACTAAGTTCTCACAGAAAACCTGTTACTTTATATTGACATT | 4042 |
| gb:MT019531 | Organism:Severe | ACAACAACCTCTGGAAGAACTAAGTTCTCACAGAAAACCTGTTACTTTATATTGACATT | 4042 |
| gb:MN996528 | Organism:Severe | ACAACAACCTCTGGAAGAACTAAGTTCTCACAGAAAACCTGTTACTTTATATTGACATT | 4042 |
| gb:MN996530 | Organism:Severe | ACAACAACCTCTGGAAGAACTAAGTTCTCACAGAAAACCTGTTACTTTATATTGACATT | 4028 |
| gb:MN908947 | Organism:Severe | ACAACAACCTCTGGAAGAACTAAGTTCTCACAGAAAACCTGTTACTTTATATTGACATT | 4042 |
| gb:MT019532 | Organism:Severe | ACAACAACCTCTGGAAGAACTAAGTTCTCACAGAAAACCTGTTACTTTATATTGACATT | 4042 |

\*\*\*\*\*

|             |                 |                                                              |      |
|-------------|-----------------|--------------------------------------------------------------|------|
| gb:MT020781 | Organism:Severe | AATGGCAATCTTCATCCAGATTCTGCCACTCTTGTTAGTGACATTGACATCACTTTCTTA | 4090 |
| gb:MT007544 | Organism:Severe | AATGGCAATCTTCATCCAGATTCTGCCACTCTTGTTAGTGACATTGACATCACTTTCTTA | 4102 |
| gb:MN994467 | Organism:Severe | AATGGCAATCTTCATCCAGATTCTGCCACTCTTGTTAGTGACATTGACATCACTTTCTTA | 4102 |
| gb:MT044257 | Organism:Severe | AATGGCAATCTTCATCCAGATTCTGCCACTCTTGTTAGTGACATTGACATCACTTTCTTA | 4102 |
| gb:MT106054 | Organism:Severe | AATGGCAATCTTCATCCAGATTCTGCCACTCTTGTTAGTGACATTGACATCACTTTCTTA | 4102 |
| gb:MT049951 | Organism:Severe | AATGGCAATCTTCATCCAGATTCTGCCACTCTTGTTAGTGACATTGACATCACTTTCTTA | 4102 |
| gb:MN975262 | Organism:Severe | AATGGCAATCTTCATCCAGATTCTGCCACTCTTGTTAGTGACATTGACATCACTTTCTTA | 4102 |
| gb:MT106052 | Organism:Severe | AATGGCAATCTTCATCCAGATTCTGCCACTCTTGTTAGTGACATTGACATCACTTTCTTA | 4102 |
| gb:LC522975 | Organism:Severe | AATGGCAATCTTCATCCAGATTCTGCCACTCTTGTTAGTGACATTGACATCACTTTCTTA | 4099 |
| gb:LC522973 | Organism:Severe | AATGGCAATCTTCATCCAGATTCTGCCACTCTTGTTAGTGACATTGACATCACTTTCTTA | 4099 |
| gb:LC522974 | Organism:Severe | AATGGCAATCTTCATCCAGATTCTGCCACTCTTGTTAGTGACATTGACATCACTTTCTTA | 4099 |
| gb:MN985325 | Organism:Severe | AATGGCAATCTTCATCCAGATTCTGCCACTCTTGTTAGTGACATTGACATCACTTTCTTA | 4102 |
| gb:MT020881 | Organism:Severe | AATGGCAATCTTCATCCAGATTCTGCCACTCTTGTTAGTGACATTGACATCACTTTCTTA | 4102 |
| gb:MT020880 | Organism:Severe | AATGGCAATCTTCATCCAGATTCTGCCACTCTTGTTAGTGACATTGACATCACTTTCTTA | 4102 |
| gb:MT066175 | Organism:Severe | AATGGCAATCTTCATCCAGATTCTGCCACTCTTGTTAGTGACATTGACATCACTTTCTTA | 4102 |
| gb:MN997409 | Organism:Severe | AATGGCAATCTTCATCCAGATTCTGCCACTCTTGTTAGTGACATTGACATCACTTTCTTA | 4102 |
| gb:MN938384 | Organism:Severe | AATGGCAATCTTCATCCAGATTCTGCCACTCTTGTTAGTGACATTGACATCACTTTCTTA | 4070 |
| gb:MT044258 | Organism:Severe | AATGGCAATCTTCATCCAGATTCTGCCACTCTTGTTAGTGACATTGACATCACTTTCTTA | 4078 |
| gb:MT039890 | Organism:Severe | AATGGCAATCTTCATCCAGATTCTGCCACTCTTGTTAGTGACATTGACATCACTTTCTTA | 4102 |
| gb:MN988713 | Organism:Severe | AATGGCAATCTTCATCCAGATTCTGCCACTCTTGTTAGTGACATTGACATCACTTTCTTA | 4102 |
| gb:LC521925 | Organism:Severe | AATGGCAATCTTCATCCAGATTCTGCCACTCTTGTTAGTGACATTGACATCACTTTCTTA | 4075 |
| gb:MT093571 | Organism:Severe | AATGGCAATCTTCATCCAGATTCTGCCACTCTTGTTAGTGACATTGACATCACTTTCTTA | 4102 |
| gb:MT039887 | Organism:Severe | AATGGCAATCTTCATCCAGATTCTGCCACTCTTGTTAGTGACATTGACATCACTTTCTTA | 4102 |
| gb:MT019530 | Organism:Severe | AATGGCAATCTTCATCCAGATTCTGCCACTCTTGTTAGTGACATTGACATCACTTTCTTA | 4102 |
| gb:MT039888 | Organism:Severe | AATGGCAATCTTCATCCAGATTCTGCCACTCTTGTTAGTGACATTGACATCACTTTCTTA | 4102 |
| gb:LC522972 | Organism:Severe | AATGGCAATCTTCATCCAGATTCTGCCACTCTTGTTAGTGACATTGACATCACTTTCTTA | 4099 |
| gb:MT027063 | Organism:Severe | AATGGCAATCTTCATCCAGATTCTGCCACTCTTGTTAGTGACATTGACATCACTTTCTTA | 4102 |
| gb:MT027062 | Organism:Severe | AATGGCAATCTTCATCCAGATTCTGCCACTCTTGTTAGTGACATTGACATCACTTTCTTA | 4102 |
| gb:MT019529 | Organism:Severe | AATGGCAATCTTCATCCAGATTCTGCCACTCTTGTTAGTGACATTGACATCACTTTCTTA | 4102 |
| gb:MN996529 | Organism:Severe | AATGGCAATCTTCATCCAGATTCTGCCACTCTTGTTAGTGACATTGACATCACTTTCTTA | 4090 |
| gb:MN996531 | Organism:Severe | AATGGCAATCTTCATCCAGATTCTGCCACTCTTGTTAGTGACATTGACATCACTTTCTTA | 4089 |
| gb:MT066176 | Organism:Severe | AATGGCAATCTTCATCCAGATTCTGCCACTCTTGTTAGTGACATTGACATCACTTTCTTA | 4102 |
| gb:MT027064 | Organism:Severe | AATGGCAATCTTCATCCAGATTCTGCCACTCTTGTTAGTGACATTGACATCACTTTCTTA | 4102 |
| gb:MN994468 | Organism:Severe | AATGGCAATCTTCATCCAGATTCTGCCACTCTTGTTAGTGACATTGACATCACTTTCTTA | 4102 |
| gb:MT072688 | Organism:Severe | AATGGCAATCTTCATCCAGATTCTGCCACTCTTGTTAGTGACATTGACATCACTTTCTTA | 4087 |
| gb:MN996527 | Organism:Severe | AATGGCAATCTTCATCCAGATTCTGCCACTCTTGTTAGTGACATTGACATCACTTTCTTA | 4069 |
| gb:MT093631 | Organism:Severe | AATGGCAATCTTCATCCAGATTCTGCCACTCTTGTTAGTGACATTGACATCACTTTCTTA | 4140 |
| gb:MT106053 | Organism:Severe | AATGGCAATCTTCATCCAGATTCTGCCACTCTTGTTAGTGACATTGACATCACTTTCTTA | 4102 |
| gb:MT019533 | Organism:Severe | AATGGCAATCTTCATCCAGATTCTGCCACTCTTGTTAGTGACATTGACATCACTTTCTTA | 4102 |
| gb:MT019531 | Organism:Severe | AATGGCAATCTTCATCCAGATTCTGCCACTCTTGTTAGTGACATTGACATCACTTTCTTA | 4102 |
| gb:MN996528 | Organism:Severe | AATGGCAATCTTCATCCAGATTCTGCCACTCTTGTTAGTGACATTGACATCACTTTCTTA | 4102 |
| gb:MN996530 | Organism:Severe | AATGGCAATCTTCATCCAGATTCTGCCACTCTTGTTAGTGACATTGACATCACTTTCTTA | 4088 |
| gb:MN908947 | Organism:Severe | AATGGCAATCTTCATCCAGATTCTGCCACTCTTGTTAGTGACATTGACATCACTTTCTTA | 4102 |
| gb:MT019532 | Organism:Severe | AATGGCAATCTTCATCCAGATTCTGCCACTCTTGTTAGTGACATTGACATCACTTTCTTA | 4102 |

\*\*\*\*\*

|             |                 |                                                             |      |
|-------------|-----------------|-------------------------------------------------------------|------|
| gb:MT020781 | Organism:Severe | AAGAAAGATGCTCCATATATAGTGGTGATGTTGTTCAAGAGGGTGTTTTAACTGCTGTG | 4150 |
| gb:MT007544 | Organism:Severe | AAGAAAGATGCTCCATATATAGTGGTGATGTTGTTCAAGAGGGTGTTTTAACTGCTGTG | 4162 |
| gb:MN994467 | Organism:Severe | AAGAAAGATGCTCCATATATAGTGGTGATGTTGTTCAAGAGGGTGTTTTAACTGCTGTG | 4162 |
| gb:MT044257 | Organism:Severe | AAGAAAGATGCTCCATATATAGTGGTGATGTTGTTCAAGAGGGTGTTTTAACTGCTGTG | 4162 |
| gb:MT106054 | Organism:Severe | AAGAAAGATGCTCCATATATAGTGGTGATGTTGTTCAAGAGGGTGTTTTAACTGCTGTG | 4162 |
| gb:MT049951 | Organism:Severe | AAGAAAGATGCTCCATATATAGTGGTGATGTTGTTCAAGAGGGTGTTTTAACTGCTGTG | 4162 |
| gb:MN975262 | Organism:Severe | AAGAAAGATGCTCCATATATAGTGGTGATGTTGTTCAAGAGGGTGTTTTAACTGCTGTG | 4162 |



|             |                 |                                                              |      |
|-------------|-----------------|--------------------------------------------------------------|------|
| gb:MT027063 | Organism:Severe | GTTATACCTACTAAAAAGGCTGGTGGCACTACTGAAATGCTAGCGAAAGCTTTGAGAAAA | 4222 |
| gb:MT027062 | Organism:Severe | GTTATACCTACTAAAAAGGCTGGTGGCACTACTGAAATGCTAGCGAAAGCTTTGAGAAAA | 4222 |
| gb:MT019529 | Organism:Severe | GTTATACCTACTAAAAAGGCTGGTGGCACTACTGAAATGCTAGCGAAAGCTTTGAGAAAA | 4222 |
| gb:MN996529 | Organism:Severe | GTTATACCTACTAAAAAGGCTGGTGGCACTACTGAAATGCTAGCGAAAGCTTTGAGAAAA | 4210 |
| gb:MN996531 | Organism:Severe | GTTATACCTACTAAAAAGGCTGGTGGCACTACTGAAATGCTAGCGAAAGCTTTGAGAAAA | 4209 |
| gb:MT066176 | Organism:Severe | GTTATACCTACTAAAAAGGCTGGTGGCACTACTGAAATGCTAGCGAAAGCTTTGAGAAAA | 4222 |
| gb:MT027064 | Organism:Severe | GTTATACCTACTAAAAAGGCTGGTGGCACTACTGAAATGCTAGCGAAAGCTTTGAGAAAA | 4222 |
| gb:MN994468 | Organism:Severe | GTTATACCTACTAAAAAGGCTGGTGGCACTACTGAAATGCTAGCGAAAGCTTTGAGAAAA | 4222 |
| gb:MT072688 | Organism:Severe | GTTATACCTACTAAAAAGGCTGGTGGCACTACTGAAATGCTAGCGAAAGCTTTGAGAAAA | 4207 |
| gb:MN996527 | Organism:Severe | GTTATACCTACTAAAAAGGCTGGTGGCACTACTGAAATGCTAGCGAAAGCTTTGAGAAAA | 4189 |
| gb:MT093631 | Organism:Severe | GTTATACCTACTAAAAAGGCTGGTGGCACTACTGAAATGCTAGCGAAAGCTTTGAGAAAA | 4260 |
| gb:MT106053 | Organism:Severe | GTTATACCTACTAAAAAGGCTGGTGGCACTACTGAAATGCTAGCGAAAGCTTTGAGAAAA | 4222 |
| gb:MT019533 | Organism:Severe | GTTATACCTACTAAAAAGGCTGGTGGCACTACTGAAATGCTAGCGAAAGCTTTGAGAAAA | 4222 |
| gb:MT019531 | Organism:Severe | GTTATACCTACTAAAAAGGCTGGTGGCACTACTGAAATGCTAGCGAAAGCTTTGAGAAAA | 4222 |
| gb:MN996528 | Organism:Severe | GTTATACCTACTAAAAAGGCTGGTGGCACTACTGAAATGCTAGCGAAAGCTTTGAGAAAA | 4222 |
| gb:MN996530 | Organism:Severe | GTTATACCTACTAAAAAGGCTGGTGGCACTACTGAAATGCTAGCGAAAGCTTTGAGAAAA | 4208 |
| gb:MN908947 | Organism:Severe | GTTATACCTACTAAAAAGGCTGGTGGCACTACTGAAATGCTAGCGAAAGCTTTGAGAAAA | 4222 |
| gb:MT019532 | Organism:Severe | GTTATACCTACTAAAAAGGCTGGTGGCACTACTGAAATGCTAGCGAAAGCTTTGAGAAAA | 4222 |

\*\*\*\*\*

|             |                 |                                                               |      |
|-------------|-----------------|---------------------------------------------------------------|------|
| gb:MT020781 | Organism:Severe | GTGCCAACAGACAATTATATAACCACTTACCCGGGT CAGGGTTAAATGGTTACTACTGTA | 4270 |
| gb:MT007544 | Organism:Severe | GTGCCAACAGACAATTATATAACCACTTACCCGGGT CAGGGTTAAATGGTTACTACTGTA | 4282 |
| gb:MN994467 | Organism:Severe | GTGCCAACAGACAATTATATAACCACTTACCCGGGT CAGGGTTAAATGGTTACTACTGTA | 4282 |
| gb:MT044257 | Organism:Severe | GTGCCAACAGACAATTATATAACCACTTACCCGGGT CAGGGTTAAATGGTTACTACTGTA | 4282 |
| gb:MT106054 | Organism:Severe | GTGCCAACAGACAATTATATAACCACTTACCCGGGT CAGGGTTAAATGGTTACTACTGTA | 4282 |
| gb:MT049951 | Organism:Severe | GTGCCAACAGACAATTATATAACCACTTACCCGGGT CAGGGTTAAATGGTTACTACTGTA | 4282 |
| gb:MN975262 | Organism:Severe | GTGCCAACAGACAATTATATAACCACTTACCCGGGT CAGGGTTAAATGGTTACTACTGTA | 4282 |
| gb:MT106052 | Organism:Severe | GTGCCAACAGACAATTATATAACCACTTACCCGGGT CAGGGTTAAATGGTTACTACTGTA | 4282 |
| gb:LC522975 | Organism:Severe | GTGCCAACAGACAATTATATAACCACTTACCCGGGT CAGGGTTAAATGGTTACTACTGTA | 4279 |
| gb:LC522973 | Organism:Severe | GTGCCAACAGACAATTATATAACCACTTACCCGGGT CAGGGTTAAATGGTTACTACTGTA | 4279 |
| gb:LC522974 | Organism:Severe | GTGCCAACAGACAATTATATAACCACTTACCCGGGT CAGGGTTAAATGGTTACTACTGTA | 4279 |
| gb:MN985325 | Organism:Severe | GTGCCAACAGACAATTATATAACCACTTACCCGGGT CAGGGTTAAATGGTTACTACTGTA | 4282 |
| gb:MT020881 | Organism:Severe | GTGCCAACAGACAATTATATAACCACTTACCCGGGT CAGGGTTAAATGGTTACTACTGTA | 4282 |
| gb:MT020880 | Organism:Severe | GTGCCAACAGACAATTATATAACCACTTACCCGGGT CAGGGTTAAATGGTTACTACTGTA | 4282 |
| gb:MT066175 | Organism:Severe | GTGCCAACAGACAATTATATAACCACTTACCCGGGT CAGGGTTAAATGGTTACTACTGTA | 4282 |
| gb:MN997409 | Organism:Severe | GTGCCAACAGACAATTATATAACCACTTACCCGGGT CAGGGTTAAATGGTTACTACTGTA | 4282 |
| gb:MN938384 | Organism:Severe | GTGCCAACAGACAATTATATAACCACTTACCCGGGT CAGGGTTAAATGGTTACTACTGTA | 4250 |
| gb:MT044258 | Organism:Severe | GTGCCAACAGACAATTATATAACCACTTACCCGGGT CAGGGTTAAATGGTTACTACTGTA | 4258 |
| gb:MT039890 | Organism:Severe | GTGCCAACAGACAATTATATAACCACTTACCCGGGT CAGGGTTAAATGGTTACTACTGTA | 4282 |
| gb:MN988713 | Organism:Severe | GTGCCAACAGACAATTATATAACCACTTACCCGGGT CAGGGTTAAATGGTTACTACTGTA | 4282 |
| gb:LC521925 | Organism:Severe | GTGCCAACAGACAATTATATAACCACTTACCCGGGT CAGGGTTAAATGGTTACTACTGTA | 4255 |
| gb:MT093571 | Organism:Severe | GTGCCAACAGACAATTATATAACCACTTACCCGGGT CAGGGTTAAATGGTTACTACTGTA | 4282 |
| gb:MT039887 | Organism:Severe | GTGCCAACAGACAATTATATAACCACTTACCCGGGT CAGGGTTAAATGGTTACTACTGTA | 4282 |
| gb:MT019530 | Organism:Severe | GTGCCAACAGACAATTATATAACCACTTACCCGGGT CAGGGTTAAATGGTTACTACTGTA | 4282 |
| gb:MT039888 | Organism:Severe | GTGCCAACAGACAATTATATAACCACTTACCCGGGT CAGGGTTAAATGGTTACTACTGTA | 4282 |
| gb:LC522972 | Organism:Severe | GTGCCAACAGACAATTATATAACCACTTACCCGGGT CAGGGTTAAATGGTTACTACTGTA | 4279 |
| gb:MT027063 | Organism:Severe | GTGCCAACAGACAATTATATAACCACTTACCCGGGT CAGGGTTAAATGGTTACTACTGTA | 4282 |
| gb:MT027062 | Organism:Severe | GTGCCAACAGACAATTATATAACCACTTACCCGGGT CAGGGTTAAATGGTTACTACTGTA | 4282 |
| gb:MT019529 | Organism:Severe | GTGCCAACAGACAATTATATAACCACTTACCCGGGT CAGGGTTAAATGGTTACTACTGTA | 4282 |
| gb:MN996529 | Organism:Severe | GTGCCAACAGACAATTATATAACCACTTACCCGGGT CAGGGTTAAATGGTTACTACTGTA | 4270 |
| gb:MN996531 | Organism:Severe | GTGCCAACAGACAATTATATAACCACTTACCCGGGT CAGGGTTAAATGGTTACTACTGTA | 4269 |
| gb:MT066176 | Organism:Severe | GTGCCAACAGACAATTATATAACCACTTACCCGGGT CAGGGTTAAATGGTTACTACTGTA | 4282 |
| gb:MT027064 | Organism:Severe | GTGCCAACAGACAATTATATAACCACTTACCCGGGT CAGGGTTAAATGGTTACTACTGTA | 4282 |
| gb:MN994468 | Organism:Severe | GTGCCAACAGACAATTATATAACCACTTACCCGGGT CAGGGTTAAATGGTTACTACTGTA | 4282 |
| gb:MT072688 | Organism:Severe | GTGCCAACAGACAATTATATAACCACTTACCCGGGT CAGGGTTAAATGGTTACTACTGTA | 4267 |
| gb:MN996527 | Organism:Severe | GTGCCAACAGACAATTATATAACCACTTACCCGGGT CAGGGTTAAATGGTTACTACTGTA | 4249 |
| gb:MT093631 | Organism:Severe | GTGCCAACAGACAATTATATAACCACTTACCCGGGT CAGGGTTAAATGGTTACTACTGTA | 4320 |
| gb:MT106053 | Organism:Severe | GTGCCAACAGACAATTATATAACCACTTACCCGGGT CAGGGTTAAATGGTTACTACTGTA | 4282 |
| gb:MT019533 | Organism:Severe | GTGCCAACAGACAATTATATAACCACTTACCCGGGT CAGGGTTAAATGGTTACTACTGTA | 4282 |
| gb:MT019531 | Organism:Severe | GTGCCAACAGACAATTATATAACCACTTACCCGGGT CAGGGTTAAATGGTTACTACTGTA | 4282 |
| gb:MN996528 | Organism:Severe | GTGCCAACAGACAATTATATAACCACTTACCCGGGT CAGGGTTAAATGGTTACTACTGTA | 4282 |
| gb:MN996530 | Organism:Severe | GTGCCAACAGACAATTATATAACCACTTACCCGGGT CAGGGTTAAATGGTTACTACTGTA | 4268 |
| gb:MN908947 | Organism:Severe | GTGCCAACAGACAATTATATAACCACTTACCCGGGT CAGGGTTAAATGGTTACTACTGTA | 4282 |
| gb:MT019532 | Organism:Severe | GTGCCAACAGACAATTATATAACCACTTACCCGGGT CAGGGTTAAATGGTTACTACTGTA | 4282 |

\*\*\*\*\*



|             |                 |                                                               |      |
|-------------|-----------------|---------------------------------------------------------------|------|
| gb:MT039890 | Organism:Severe | ATCTCTAATGAGAAGCAAGAAATTCTTGAAC TGTTCCTTGGAAATTTGCGAGAAATGCTT | 4402 |
| gb:MN988713 | Organism:Severe | ATCTCTAATGAGAAGCAAGAAATTCTTGAAC TGTTCCTTGGAAATTTGCGAGAAATGCTT | 4402 |
| gb:LC521925 | Organism:Severe | ATCTCTAATGAGAAGCAAGAAATTCTTGAAC TGTTCCTTGGAAATTTGCGAGAAATGCTT | 4375 |
| gb:MT093571 | Organism:Severe | ATCTCTAATGAGAAGCAAGAAATTCTTGAAC TGTTCCTTGGAAATTTGCGAGAAATGCTT | 4402 |
| gb:MT039887 | Organism:Severe | ATCTCTAATGAGAAGCAAGAAATTCTTGAAC TGTTCCTTGGAAATTTGCGAGAAATGCTT | 4402 |
| gb:MT019530 | Organism:Severe | ATCTCTAATGAGAAGCAAGAAATTCTTGAAC TGTTCCTTGGAAATTTGCGAGAAATGCTT | 4402 |
| gb:MT039888 | Organism:Severe | ATCTCTAATGAGAAGCAAGAAATTCTTGAAC TGTTCCTTGGAAATTTGCGAGAAATGCTT | 4402 |
| gb:LC522972 | Organism:Severe | ATCTCTAATGAGAAGCAAGAAATTCTTGAAC TGTTCCTTGGAAATTTGCGAGAAATGCTT | 4399 |
| gb:MT027063 | Organism:Severe | ATCTCTAATGAGAAGCAAGAAATTCTTGAAC TGTTCCTTGGAAATTTGCGAGAAATGCTT | 4402 |
| gb:MT027062 | Organism:Severe | ATCTCTAATGAGAAGCAAGAAATTCTTGAAC TGTTCCTTGGAAATTTGCGAGAAATGCTT | 4402 |
| gb:MT019529 | Organism:Severe | ATCTCTAATGAGAAGCAAGAAATTCTTGAAC TGTTCCTTGGAAATTTGCGAGAAATGCTT | 4402 |
| gb:MN996529 | Organism:Severe | ATCTCTAATGAGAAGCAAGAAATTCTTGAAC TGTTCCTTGGAAATTTGCGAGAAATGCTT | 4390 |
| gb:MN996531 | Organism:Severe | ATCTCTAATGAGAAGCAAGAAATTCTTGAAC TGTTCCTTGGAAATTTGCGAGAAATGCTT | 4389 |
| gb:MT066176 | Organism:Severe | ATCTCTAATGAGAAGCAAGAAATTCTTGAAC TGTTCCTTGGAAATTTGCGAGAAATGCTT | 4402 |
| gb:MT027064 | Organism:Severe | ATCTCTAATGAGAAGCAAGAAATTCTTGAAC TGTTCCTTGGAAATTTGCGAGAAATGCTT | 4402 |
| gb:MN994468 | Organism:Severe | ATCTCTAATGAGAAGCAAGAAATTCTTGAAC TGTTCCTTGGAAATTTGCGAGAAATGCTT | 4402 |
| gb:MT072688 | Organism:Severe | ATCTCTAATGAGAAGCAAGAAATTCTTGAAC TGTTCCTTGGAAATTTGCGAGAAATGCTT | 4387 |
| gb:MN996527 | Organism:Severe | ATCTCTAATGAGAAGCAAGAAATTCTTGAAC TGTTCCTTGGAAATTTGCGAGAAATGCTT | 4369 |
| gb:MT093631 | Organism:Severe | ATCTCTAATGAGAAGCAAGAAATTCTTGAAC TGTTCCTTGGAAATTTGCGAGAAATGCTT | 4440 |
| gb:MT106053 | Organism:Severe | ATCTCTAATGAGAAGCAAGAAATTCTTGAAC TGTTCCTTGGAAATTTGCGAGAAATGCTT | 4402 |
| gb:MT019533 | Organism:Severe | ATCTCTAATGAGAAGCAAGAAATTCTTGAAC TGTTCCTTGGAAATTTGCGAGAAATGCTT | 4402 |
| gb:MT019531 | Organism:Severe | ATCTCTAATGAGAAGCAAGAAATTCTTGAAC TGTTCCTTGGAAATTTGCGAGAAATGCTT | 4402 |
| gb:MN996528 | Organism:Severe | ATCTCTAATGAGAAGCAAGAAATTCTTGAAC TGTTCCTTGGAAATTTGCGAGAAATGCTT | 4402 |
| gb:MN996530 | Organism:Severe | ATCTCTAATGAGAAGCAAGAAATTCTTGAAC TGTTCCTTGGAAATTTGCGAGAAATGCTT | 4388 |
| gb:MN908947 | Organism:Severe | ATCTCTAATGAGAAGCAAGAAATTCTTGAAC TGTTCCTTGGAAATTTGCGAGAAATGCTT | 4402 |
| gb:MT019532 | Organism:Severe | ATCTCTAATGAGAAGCAAGAAATTCTTGAAC TGTTCCTTGGAAATTTGCGAGAAATGCTT | 4402 |

\*\*\*\*\*

|             |                 |                                                              |      |
|-------------|-----------------|--------------------------------------------------------------|------|
| gb:MT020781 | Organism:Severe | GCACATGCAGAAGAAACACGCAAATTAATGCCTGTCTGTGTGGAAGCAAAAGCCATAGTT | 4450 |
| gb:MT007544 | Organism:Severe | GCACATGCAGAAGAAACACGCAAATTAATGCCTGTCTGTGTGGAAGCAAAAGCCATAGTT | 4462 |
| gb:MN994467 | Organism:Severe | GCACATGCAGAAGAAACACGCAAATTAATGCCTGTCTGTGTGGAAGCAAAAGCCATAGTT | 4462 |
| gb:MT044257 | Organism:Severe | GCACATGCAGAAGAAACACGCAAATTAATGCCTGTCTGTGTGGAAGCAAAAGCCATAGTT | 4462 |
| gb:MT106054 | Organism:Severe | GCACATGCAGAAGAAACACGCAAATTAATGCCTGTCTGTGTGGAAGCAAAAGCCATAGTT | 4462 |
| gb:MT049951 | Organism:Severe | GCACATGCAGAAGAAACACGCAAATTAATGCCTGTCTGTGTGGAAGCAAAAGCCATAGTT | 4462 |
| gb:MN975262 | Organism:Severe | GCACATGCAGAAGAAACACGCAAATTAATGCCTGTCTGTGTGGAAGCAAAAGCCATAGTT | 4462 |
| gb:MT106052 | Organism:Severe | GCACATGCAGAAGAAACACGCAAATTAATGCCTGTCTGTGTGGAAGCAAAAGCCATAGTT | 4462 |
| gb:LC522975 | Organism:Severe | GCACATGCAGAAGAAACACGCAAATTAATGCCTGTCTGTGTGGAAGCAAAAGCCATAGTT | 4459 |
| gb:LC522973 | Organism:Severe | GCACATGCAGAAGAAACACGCAAATTAATGCCTGTCTGTGTGGAAGCAAAAGCCATAGTT | 4459 |
| gb:LC522974 | Organism:Severe | GCACATGCAGAAGAAACACGCAAATTAATGCCTGTCTGTGTGGAAGCAAAAGCCATAGTT | 4459 |
| gb:MN985325 | Organism:Severe | GCACATGCAGAAGAAACACGCAAATTAATGCCTGTCTGTGTGGAAGCAAAAGCCATAGTT | 4462 |
| gb:MT020881 | Organism:Severe | GCACATGCAGAAGAAACACGCAAATTAATGCCTGTCTGTGTGGAAGCAAAAGCCATAGTT | 4462 |
| gb:MT020880 | Organism:Severe | GCACATGCAGAAGAAACACGCAAATTAATGCCTGTCTGTGTGGAAGCAAAAGCCATAGTT | 4462 |
| gb:MT066175 | Organism:Severe | GCACATGCAGAAGAAACACGCAAATTAATGCCTGTCTGTGTGGAAGCAAAAGCCATAGTT | 4462 |
| gb:MN997409 | Organism:Severe | GCACATGCAGAAGAAACACGCAAATTAATGCCTGTCTGTGTGGAAGCAAAAGCCATAGTT | 4462 |
| gb:MN938384 | Organism:Severe | GCACATGCAGAAGAAACACGCAAATTAATGCCTGTCTGTGTGGAAGCAAAAGCCATAGTT | 4430 |
| gb:MT044258 | Organism:Severe | GCACATGCAGAAGAAACACGCAAATTAATGCCTGTCTGTGTGGAAGCAAAAGCCATAGTT | 4438 |
| gb:MT039890 | Organism:Severe | GCACATGCAGAAGAAACACGCAAATTAATGCCTGTCTGTGTGGAAGCAAAAGCCATAGTT | 4462 |
| gb:MN988713 | Organism:Severe | GCACATGCAGAAGAAACACGCAAATTAATGCCTGTCTGTGTGGAAGCAAAAGCCATAGTT | 4462 |
| gb:LC521925 | Organism:Severe | GCACATGCAGAAGAAACACGCAAATTAATGCCTGTCTGTGTGGAAGCAAAAGCCATAGTT | 4435 |
| gb:MT093571 | Organism:Severe | GCACATGCAGAAGAAACACGCAAATTAATGCCTGTCTGTGTGGAAGCAAAAGCCATAGTT | 4462 |
| gb:MT039887 | Organism:Severe | GCACATGCAGAAGAAACACGCAAATTAATGCCTGTCTGTGTGGAAGCAAAAGCCATAGTT | 4462 |
| gb:MT019530 | Organism:Severe | GCACATGCAGAAGAAACACGCAAATTAATGCCTGTCTGTGTGGAAGCAAAAGCCATAGTT | 4462 |
| gb:MT039888 | Organism:Severe | GCACATGCAGAAGAAACACGCAAATTAATGCCTGTCTGTGTGGAAGCAAAAGCCATAGTT | 4462 |
| gb:LC522972 | Organism:Severe | GCACATGCAGAAGAAACACGCAAATTAATGCCTGTCTGTGTGGAAGCAAAAGCCATAGTT | 4459 |
| gb:MT027063 | Organism:Severe | GCACATGCAGAAGAAACACGCAAATTAATGCCTGTCTGTGTGGAAGCAAAAGCCATAGTT | 4462 |
| gb:MT027062 | Organism:Severe | GCACATGCAGAAGAAACACGCAAATTAATGCCTGTCTGTGTGGAAGCAAAAGCCATAGTT | 4462 |
| gb:MT019529 | Organism:Severe | GCACATGCAGAAGAAACACGCAAATTAATGCCTGTCTGTGTGGAAGCAAAAGCCATAGTT | 4462 |
| gb:MN996529 | Organism:Severe | GCACATGCAGAAGAAACACGCAAATTAATGCCTGTCTGTGTGGAAGCAAAAGCCATAGTT | 4450 |
| gb:MN996531 | Organism:Severe | GCACATGCAGAAGAAACACGCAAATTAATGCCTGTCTGTGTGGAAGCAAAAGCCATAGTT | 4449 |
| gb:MT066176 | Organism:Severe | GCACATGCAGAAGAAACACGCAAATTAATGCCTGTCTGTGTGGAAGCAAAAGCCATAGTT | 4462 |
| gb:MT027064 | Organism:Severe | GCACATGCAGAAGAAACACGCAAATTAATGCCTGTCTGTGTGGAAGCAAAAGCCATAGTT | 4462 |
| gb:MN994468 | Organism:Severe | GCACATGCAGAAGAAACACGCAAATTAATGCCTGTCTGTGTGGAAGCAAAAGCCATAGTT | 4462 |
| gb:MT072688 | Organism:Severe | GCACATGCAGAAGAAACACGCAAATTAATGCCTGTCTGTGTGGAAGCAAAAGCCATAGTT | 4447 |
| gb:MN996527 | Organism:Severe | GCACATGCAGAAGAAACACGCAAATTAATGCCTGTCTGTGTGGAAGCAAAAGCCATAGTT | 4429 |
| gb:MT093631 | Organism:Severe | GCACATGCAGAAGAAACACGCAAATTAATGCCTGTCTGTGTGGAAGCAAAAGCCATAGTT | 4500 |

|             |                 |                                                              |      |
|-------------|-----------------|--------------------------------------------------------------|------|
| gb:MT106053 | Organism:Severe | GCACATGCAGAAGAAACACGCAAATTAATGCCTGTCTGTGTGGAAACTAAAGCCATAGTT | 4462 |
| gb:MT019533 | Organism:Severe | GCACATGCAGAAGAAACACGCAAATTAATGCCTGTCTGTGTGGAAACTAAAGCCATAGTT | 4462 |
| gb:MT019531 | Organism:Severe | GCACATGCAGAAGAAACACGCAAATTAATGCCTGTCTGTGTGGAAACTAAAGCCATAGTT | 4462 |
| gb:MN996528 | Organism:Severe | GCACATGCAGAAGAAACACGCAAATTAATGCCTGTCTGTGTGGAAACTAAAGCCATAGTT | 4462 |
| gb:MN996530 | Organism:Severe | GCACATGCAGAAGAAACACGCAAATTAATGCCTGTCTGTGTGGAAACTAAAGCCATAGTT | 4448 |
| gb:MN908947 | Organism:Severe | GCACATGCAGAAGAAACACGCAAATTAATGCCTGTCTGTGTGGAAACTAAAGCCATAGTT | 4462 |
| gb:MT019532 | Organism:Severe | GCACATGCAGAAGAAACACGCAAATTAATGCCTGTCTGTGTGGAAACTAAAGCCATAGTT | 4462 |

\*\*\*\*\*

|             |                 |                                                             |      |
|-------------|-----------------|-------------------------------------------------------------|------|
| gb:MT020781 | Organism:Severe | TCAACTATACAGCGTAAATATAAGGGTATTAATAACAAGAGGGTGTGGTTGATTATGGT | 4510 |
| gb:MT007544 | Organism:Severe | TCAACTATACAGCGTAAATATAAGGGTATTAATAACAAGAGGGTGTGGTTGATTATGGT | 4522 |
| gb:MN994467 | Organism:Severe | TCAACTATACAGCGTAAATATAAGGGTATTAATAACAAGAGGGTGTGGTTGATTATGGT | 4522 |
| gb:MT044257 | Organism:Severe | TCAACTATACAGCGTAAATATAAGGGTATTAATAACAAGAGGGTGTGGTTGATTATGGT | 4522 |
| gb:MT106054 | Organism:Severe | TCAACTATACAGCGTAAATATAAGGGTATTAATAACAAGAGGGTGTGGTTGATTATGGT | 4522 |
| gb:MT049951 | Organism:Severe | TCAACTATACAGCGTAAATATAAGGGTATTAATAACAAGAGGGTGTGGTTGATTATGGT | 4522 |
| gb:MN975262 | Organism:Severe | TCAACTATACAGCGTAAATATAAGGGTATTAATAACAAGAGGGTGTGGTTGATTATGGT | 4522 |
| gb:MT106052 | Organism:Severe | TCAACTATACAGCGTAAATATAAGGGTATTAATAACAAGAGGGTGTGGTTGATTATGGT | 4522 |
| gb:LC522975 | Organism:Severe | TCAACTATACAGCGTAAATATAAGGGTATTAATAACAAGAGGGTGTGGTTGATTATGGT | 4519 |
| gb:LC522973 | Organism:Severe | TCAACTATACAGCGTAAATATAAGGGTATTAATAACAAGAGGGTGTGGTTGATTATGGT | 4519 |
| gb:LC522974 | Organism:Severe | TCAACTATACAGCGTAAATATAAGGGTATTAATAACAAGAGGGTGTGGTTGATTATGGT | 4519 |
| gb:MN985325 | Organism:Severe | TCAACTATACAGCGTAAATATAAGGGTATTAATAACAAGAGGGTGTGGTTGATTATGGT | 4522 |
| gb:MT020881 | Organism:Severe | TCAACTATACAGCGTAAATATAAGGGTATTAATAACAAGAGGGTGTGGTTGATTATGGT | 4522 |
| gb:MT020880 | Organism:Severe | TCAACTATACAGCGTAAATATAAGGGTATTAATAACAAGAGGGTGTGGTTGATTATGGT | 4522 |
| gb:MT066175 | Organism:Severe | TCAACTATACAGCGTAAATATAAGGGTATTAATAACAAGAGGGTGTGGTTGATTATGGT | 4522 |
| gb:MN997409 | Organism:Severe | TCAACTATACAGCGTAAATATAAGGGTATTAATAACAAGAGGGTGTGGTTGATTATGGT | 4522 |
| gb:MN938384 | Organism:Severe | TCAACTATACAGCGTAAATATAAGGGTATTAATAACAAGAGGGTGTGGTTGATTATGGT | 4490 |
| gb:MT044258 | Organism:Severe | TCAACTATACAGCGTAAATATAAGGGTATTAATAACAAGAGGGTGTGGTTGATTATGGT | 4498 |
| gb:MT039890 | Organism:Severe | TCAACTATACAGCGTAAATATAAGGGTATTAATAACAAGAGGGTGTGGTTGATTATGGT | 4522 |
| gb:MN988713 | Organism:Severe | TCAACTATACAGCGTAAATATAAGGGTATTAATAACAAGAGGGTGTGGTTGATTATGGT | 4522 |
| gb:LC521925 | Organism:Severe | TCAACTATACAGCGTAAATATAAGGGTATTAATAACAAGAGGGTGTGGTTGATTATGGT | 4495 |
| gb:MT093571 | Organism:Severe | TCAACTATACAGCGTAAATATAAGGGTATTAATAACAAGAGGGTGTGGTTGATTATGGT | 4522 |
| gb:MT039887 | Organism:Severe | TCAACTATACAGCGTAAATATAAGGGTATTAATAACAAGAGGGTGTGGTTGATTATGGT | 4522 |
| gb:MT019530 | Organism:Severe | TCAACTATACAGCGTAAATATAAGGGTATTAATAACAAGAGGGTGTGGTTGATTATGGT | 4522 |
| gb:MT039888 | Organism:Severe | TCAACTATACAGCGTAAATATAAGGGTATTAATAACAAGAGGGTGTGGTTGATTATGGT | 4522 |
| gb:LC522972 | Organism:Severe | TCAACTATACAGCGTAAATATAAGGGTATTAATAACAAGAGGGTGTGGTTGATTATGGT | 4519 |
| gb:MT027063 | Organism:Severe | TCAACTATACAGCGTAAATATAAGGGTATTAATAACAAGAGGGTGTGGTTGATTATGGT | 4522 |
| gb:MT027062 | Organism:Severe | TCAACTATACAGCGTAAATATAAGGGTATTAATAACAAGAGGGTGTGGTTGATTATGGT | 4522 |
| gb:MT019529 | Organism:Severe | TCAACTATACAGCGTAAATATAAGGGTATTAATAACAAGAGGGTGTGGTTGATTATGGT | 4522 |
| gb:MN996529 | Organism:Severe | TCAACTATACAGCGTAAATATAAGGGTATTAATAACAAGAGGGTGTGGTTGATTATGGT | 4510 |
| gb:MN996531 | Organism:Severe | TCAACTATACAGCGTAAATATAAGGGTATTAATAACAAGAGGGTGTGGTTGATTATGGT | 4509 |
| gb:MT066176 | Organism:Severe | TCAACTATACAGCGTAAATATAAGGGTATTAATAACAAGAGGGTGTGGTTGATTATGGT | 4522 |
| gb:MT027064 | Organism:Severe | TCAACTATACAGCGTAAATATAAGGGTATTAATAACAAGAGGGTGTGGTTGATTATGGT | 4522 |
| gb:MN994468 | Organism:Severe | TCAACTATACAGCGTAAATATAAGGGTATTAATAACAAGAGGGTGTGGTTGATTATGGT | 4522 |
| gb:MT072688 | Organism:Severe | TCAACTATACAGCGTAAATATAAGGGTATTAATAACAAGAGGGTGTGGTTGATTATGGT | 4507 |
| gb:MN996527 | Organism:Severe | TCAACTATACAGCGTAAATATAAGGGTATTAATAACAAGAGGGTGTGGTTGATTATGGT | 4489 |
| gb:MT093631 | Organism:Severe | TCAACTATACAGCGTAAATATAAGGGTATTAATAACAAGAGGGTGTGGTTGATTATGGT | 4560 |
| gb:MT106053 | Organism:Severe | TCAACTATACAGCGTAAATATAAGGGTATTAATAACAAGAGGGTGTGGTTGATTATGGT | 4522 |
| gb:MT019533 | Organism:Severe | TCAACTATACAGCGTAAATATAAGGGTATTAATAACAAGAGGGTGTGGTTGATTATGGT | 4522 |
| gb:MT019531 | Organism:Severe | TCAACTATACAGCGTAAATATAAGGGTATTAATAACAAGAGGGTGTGGTTGATTATGGT | 4522 |
| gb:MN996528 | Organism:Severe | TCAACTATACAGCGTAAATATAAGGGTATTAATAACAAGAGGGTGTGGTTGATTATGGT | 4522 |
| gb:MN996530 | Organism:Severe | TCAACTATACAGCGTAAATATAAGGGTATTAATAACAAGAGGGTGTGGTTGATTATGGT | 4508 |
| gb:MN908947 | Organism:Severe | TCAACTATACAGCGTAAATATAAGGGTATTAATAACAAGAGGGTGTGGTTGATTATGGT | 4522 |
| gb:MT019532 | Organism:Severe | TCAACTATACAGCGTAAATATAAGGGTATTAATAACAAGAGGGTGTGGTTGATTATGGT | 4522 |

\*\*\*\*\*

|             |                 |                                                             |      |
|-------------|-----------------|-------------------------------------------------------------|------|
| gb:MT020781 | Organism:Severe | GCTAGATTTTACTTTTACACCGTAAACAACCTGTAGCGTCACTTATCAACACACTTAAC | 4570 |
| gb:MT007544 | Organism:Severe | GCTAGATTTTACTTTTACACCGTAAACAACCTGTAGCGTCACTTATCAACACACTTAAC | 4582 |
| gb:MN994467 | Organism:Severe | GCTAGATTTTACTTTTACACCGTAAACAACCTGTAGCGTCACTTATCAACACACTTAAC | 4582 |
| gb:MT044257 | Organism:Severe | GCTAGATTTTACTTTTACACCGTAAACAACCTGTAGCGTCACTTATCAACACACTTAAC | 4582 |
| gb:MT106054 | Organism:Severe | GCTAGATTTTACTTTTACACCGTAAACAACCTGTAGCGTCACTTATCAACACACTTAAC | 4582 |
| gb:MT049951 | Organism:Severe | GCTAGATTTTACTTTTACACCGTAAACAACCTGTAGCGTCACTTATCAACACACTTAAC | 4582 |
| gb:MN975262 | Organism:Severe | GCTAGATTTTACTTTTACACCGTAAACAACCTGTAGCGTCACTTATCAACACACTTAAC | 4582 |
| gb:MT106052 | Organism:Severe | GCTAGATTTTACTTTTACACCGTAAACAACCTGTAGCGTCACTTATCAACACACTTAAC | 4582 |
| gb:LC522975 | Organism:Severe | GCTAGATTTTACTTTTACACCGTAAACAACCTGTAGCGTCACTTATCAACACACTTAAC | 4579 |
| gb:LC522973 | Organism:Severe | GCTAGATTTTACTTTTACACCGTAAACAACCTGTAGCGTCACTTATCAACACACTTAAC | 4579 |





|             |                 |                                                              |      |
|-------------|-----------------|--------------------------------------------------------------|------|
| gb:MN996529 | Organism:Severe | GATCTAAATGAAACTCTTGTTACAATGCCACTTGGCTATGTAACACATGGCTTAAATTTG | 4630 |
| gb:MN996531 | Organism:Severe | GATCTAAATGAAACTCTTGTTACAATGCCACTTGGCTATGTAACACATGGCTTAAATTTG | 4629 |
| gb:MT066176 | Organism:Severe | GATCTAAATGAAACTCTTGTTACAATGCCACTTGGCTATGTAACACATGGCTTAAATTTG | 4642 |
| gb:MT027064 | Organism:Severe | GATCTAAATGAAACTCTTGTTACAATGCCACTTGGCTATGTAACACATGGCTTAAATTTG | 4642 |
| gb:MN994468 | Organism:Severe | GATCTAAATGAAACTCTTGTTACAATGCCACTTGGCTATGTAACACATGGCTTAAATTTG | 4642 |
| gb:MT072688 | Organism:Severe | GATCTAAATGAAACTCTTGTTACAATGCCACTTGGCTATGTAACACATGGCTTAAATTTG | 4627 |
| gb:MN996527 | Organism:Severe | GATCTAAATGAAACTCTTGTTACAATGCCACTTGGCTATGTAACACATGGCTTAAATTTG | 4609 |
| gb:MT093631 | Organism:Severe | GATCTAAATGAAACTCTTGTTACAATGCCACTTGGCTATGTAACACATGGCTTAAATTTG | 4680 |
| gb:MT106053 | Organism:Severe | GATCTAAATGAAACTCTTGTTACAATGCCACTTGGCTATGTAACACATGGCTTAAATTTG | 4642 |
| gb:MT019533 | Organism:Severe | GATCTAAATGAAACTCTTGTTACAATGCCACTTGGCTATGTAACACATGGCTTAAATTTG | 4642 |
| gb:MT019531 | Organism:Severe | GATCTAAATGAAACTCTTGTTACAATGCCACTTGGCTATGTAACACATGGCTTAAATTTG | 4642 |
| gb:MN996528 | Organism:Severe | GATCTAAATGAAACTCTTGTTACAATGCCACTTGGCTATGTAACACATGGCTTAAATTTG | 4642 |
| gb:MN996530 | Organism:Severe | GATCTAAATGAAACTCTTGTTACAATGCCACTTGGCTATGTAACACATGGCTTAAATTTG | 4628 |
| gb:MN908947 | Organism:Severe | GATCTAAATGAAACTCTTGTTACAATGCCACTTGGCTATGTAACACATGGCTTAAATTTG | 4642 |
| gb:MT019532 | Organism:Severe | GATCTAAATGAAACTCTTGTTACAATGCCACTTGGCTATGTAACACATGGCTTAAATTTG | 4642 |

\*\*\*\*\*

|             |                 |                                                              |      |
|-------------|-----------------|--------------------------------------------------------------|------|
| gb:MT020781 | Organism:Severe | GAAGAAGCTGCTCGGTATATGAGATCTCTCAAAGTGCCAGCTACAGTTTCTGTTTCTTCA | 4690 |
| gb:MT007544 | Organism:Severe | GAAGAAGCTGCTCGGTATATGAGATCTCTCAAAGTGCCAGCTACAGTTTCTGTTTCTTCA | 4702 |
| gb:MN994467 | Organism:Severe | GAAGAAGCTGCTCGGTATATGAGATCTCTCAAAGTGCCAGCTACAGTTTCTGTTTCTTCA | 4702 |
| gb:MT044257 | Organism:Severe | GAAGAAGCTGCTCGGTATATGAGATCTCTCAAAGTGCCAGCTACAGTTTCTGTTTCTTCA | 4702 |
| gb:MT106054 | Organism:Severe | GAAGAAGCTGCTCGGTATATGAGATCTCTCAAAGTGCCAGCTACAGTTTCTGTTTCTTCA | 4702 |
| gb:MT049951 | Organism:Severe | GAAGAAGCTGCTCGGTATATGAGATCTCTCAAAGTGCCAGCTACAGTTTCTGTTTCTTCA | 4702 |
| gb:MN975262 | Organism:Severe | GAAGAAGCTGCTCGGTATATGAGATCTCTCAAAGTGCCAGCTACAGTTTCTGTTTCTTCA | 4702 |
| gb:MT106052 | Organism:Severe | GAAGAAGCTGCTCGGTATATGAGATCTCTCAAAGTGCCAGCTACAGTTTCTGTTTCTTCA | 4702 |
| gb:LC522975 | Organism:Severe | GAAGAAGCTGCTCGGTATATGAGATCTCTCAAAGTGCCAGCTACAGTTTCTGTTTCTTCA | 4699 |
| gb:LC522973 | Organism:Severe | GAAGAAGCTGCTCGGTATATGAGATCTCTCAAAGTGCCAGCTACAGTTTCTGTTTCTTCA | 4699 |
| gb:LC522974 | Organism:Severe | GAAGAAGCTGCTCGGTATATGAGATCTCTCAAAGTGCCAGCTACAGTTTCTGTTTCTTCA | 4699 |
| gb:MN985325 | Organism:Severe | GAAGAAGCTGCTCGGTATATGAGATCTCTCAAAGTGCCAGCTACAGTTTCTGTTTCTTCA | 4702 |
| gb:MT020881 | Organism:Severe | GAAGAAGCTGCTCGGTATATGAGATCTCTCAAAGTGCCAGCTACAGTTTCTGTTTCTTCA | 4702 |
| gb:MT020880 | Organism:Severe | GAAGAAGCTGCTCGGTATATGAGATCTCTCAAAGTGCCAGCTACAGTTTCTGTTTCTTCA | 4702 |
| gb:MT066175 | Organism:Severe | GAAGAAGCTGCTCGGTATATGAGATCTCTCAAAGTGCCAGCTACAGTTTCTGTTTCTTCA | 4702 |
| gb:MN997409 | Organism:Severe | GAAGAAGCTGCTCGGTATATGAGATCTCTCAAAGTGCCAGCTACAGTTTCTGTTTCTTCA | 4702 |
| gb:MN938384 | Organism:Severe | GAAGAAGCTGCTCGGTATATGAGATCTCTCAAAGTGCCAGCTACAGTTTCTGTTTCTTCA | 4670 |
| gb:MT044258 | Organism:Severe | GAAGAAGCTGCTCGGTATATGAGATCTCTCAAAGTGCCAGCTACAGTTTCTGTTTCTTCA | 4678 |
| gb:MT039890 | Organism:Severe | GAAGAAGCTGCTCGGTATATGAGATCTCTCAAAGTGCCAGCTACAGTTTCTGTTTCTTCA | 4702 |
| gb:MN988713 | Organism:Severe | GAAGAAGCTGCTCGGTATATGAGATCTCTCAAAGTGCCAGCTACAGTTTCTGTTTCTTCA | 4702 |
| gb:LC521925 | Organism:Severe | GAAGAAGCTGCTCGGTATATGAGATCTCTCAAAGTGCCAGCTACAGTTTCTGTTTCTTCA | 4675 |
| gb:MT093571 | Organism:Severe | GAAGAAGCTGCTCGGTATATGAGATCTCTCAAAGTGCCAGCTACAGTTTCTGTTTCTTCA | 4702 |
| gb:MT039887 | Organism:Severe | GAAGAAGCTGCTCGGTATATGAGATCTCTCAAAGTGCCAGCTACAGTTTCTGTTTCTTCA | 4702 |
| gb:MT019530 | Organism:Severe | GAAGAAGCTGCTCGGTATATGAGATCTCTCAAAGTGCCAGCTACAGTTTCTGTTTCTTCA | 4702 |
| gb:MT039888 | Organism:Severe | GAAGAAGCTGCTCGGTATATGAGATCTCTCAAAGTGCCAGCTACAGTTTCTGTTTCTTCA | 4702 |
| gb:LC522972 | Organism:Severe | GAAGAAGCTGCTCGGTATATGAGATCTCTCAAAGTGCCAGCTACAGTTTCTGTTTCTTCA | 4699 |
| gb:MT027063 | Organism:Severe | GAAGAAGCTGCTCGGTATATGAGATCTCTCAAAGTGCCAGCTACAGTTTCTGTTTCTTCA | 4702 |
| gb:MT027062 | Organism:Severe | GAAGAAGCTGCTCGGTATATGAGATCTCTCAAAGTGCCAGCTACAGTTTCTGTTTCTTCA | 4702 |
| gb:MT019529 | Organism:Severe | GAAGAAGCTGCTCGGTATATGAGATCTCTCAAAGTGCCAGCTACAGTTTCTGTTTCTTCA | 4702 |
| gb:MN996529 | Organism:Severe | GAAGAAGCTGCTCGGTATATGAGATCTCTCAAAGTGCCAGCTACAGTTTCTGTTTCTTCA | 4690 |
| gb:MN996531 | Organism:Severe | GAAGAAGCTGCTCGGTATATGAGATCTCTCAAAGTGCCAGCTACAGTTTCTGTTTCTTCA | 4689 |
| gb:MT066176 | Organism:Severe | GAAGAAGCTGCTCGGTATATGAGATCTCTCAAAGTGCCAGCTACAGTTTCTGTTTCTTCA | 4702 |
| gb:MT027064 | Organism:Severe | GAAGAAGCTGCTCGGTATATGAGATCTCTCAAAGTGCCAGCTACAGTTTCTGTTTCTTCA | 4702 |
| gb:MN994468 | Organism:Severe | GAAGAAGCTGCTCGGTATATGAGATCTCTCAAAGTGCCAGCTACAGTTTCTGTTTCTTCA | 4702 |
| gb:MT072688 | Organism:Severe | GAAGAAGCTGCTCGGTATATGAGATCTCTCAAAGTGCCAGCTACAGTTTCTGTTTCTTCA | 4687 |
| gb:MN996527 | Organism:Severe | GAAGAAGCTGCTCGGTATATGAGATCTCTCAAAGTGCCAGCTACAGTTTCTGTTTCTTCA | 4669 |
| gb:MT093631 | Organism:Severe | GAAGAAGCTGCTCGGTATATGAGATCTCTCAAAGTGCCAGCTACAGTTTCTGTTTCTTCA | 4740 |
| gb:MT106053 | Organism:Severe | GAAGAAGCTGCTCGGTATATGAGATCTCTCAAAGTGCCAGCTACAGTTTCTGTTTCTTCA | 4702 |
| gb:MT019533 | Organism:Severe | GAAGAAGCTGCTCGGTATATGAGATCTCTCAAAGTGCCAGCTACAGTTTCTGTTTCTTCA | 4702 |
| gb:MT019531 | Organism:Severe | GAAGAAGCTGCTCGGTATATGAGATCTCTCAAAGTGCCAGCTACAGTTTCTGTTTCTTCA | 4702 |
| gb:MN996528 | Organism:Severe | GAAGAAGCTGCTCGGTATATGAGATCTCTCAAAGTGCCAGCTACAGTTTCTGTTTCTTCA | 4702 |
| gb:MN996530 | Organism:Severe | GAAGAAGCTGCTCGGTATATGAGATCTCTCAAAGTGCCAGCTACAGTTTCTGTTTCTTCA | 4688 |
| gb:MN908947 | Organism:Severe | GAAGAAGCTGCTCGGTATATGAGATCTCTCAAAGTGCCAGCTACAGTTTCTGTTTCTTCA | 4702 |
| gb:MT019532 | Organism:Severe | GAAGAAGCTGCTCGGTATATGAGATCTCTCAAAGTGCCAGCTACAGTTTCTGTTTCTTCA | 4702 |

\*\*\*\*\*

|             |                 |                                                              |      |
|-------------|-----------------|--------------------------------------------------------------|------|
| gb:MT020781 | Organism:Severe | CCTGATGCTGTTACAGCGTATAATGGTTATCTTACTTCTTCTTCTAAAACACCTGAAGAA | 4750 |
| gb:MT007544 | Organism:Severe | CCTGATGCTGTTACAGCGTATAATGGTTATCTTACTTCTTCTTCTAAAACACCTGAAGAA | 4762 |



|             |                 |                                                            |      |
|-------------|-----------------|------------------------------------------------------------|------|
| gb:MT093571 | Organism:Severe | CATTTTATTGAAACCATCTCACTTGTGTTCCCTATAAAGATTGGTCTATTCTGGACAA | 4822 |
| gb:MT039887 | Organism:Severe | CATTTTATTGAAACCATCTCACTTGTGTTCCCTATAAAGATTGGTCTATTCTGGACAA | 4822 |
| gb:MT019530 | Organism:Severe | CATTTTATTGAAACCATCTCACTTGTGTTCCCTATAAAGATTGGTCTATTCTGGACAA | 4822 |
| gb:MT039888 | Organism:Severe | CATTTTATTGAAACCATCTCACTTGTGTTCCCTATAAAGATTGGTCTATTCTGGACAA | 4822 |
| gb:LC522972 | Organism:Severe | CATTTTATTGAAACCATCTCACTTGTGTTCCCTATAAAGATTGGTCTATTCTGGACAA | 4819 |
| gb:MT027063 | Organism:Severe | CATTTTATTGAAACCATCTCACTTGTGTTCCCTATAAAGATTGGTCTATTCTGGACAA | 4822 |
| gb:MT027062 | Organism:Severe | CATTTTATTGAAACCATCTCACTTGTGTTCCCTATAAAGATTGGTCTATTCTGGACAA | 4822 |
| gb:MT019529 | Organism:Severe | CATTTTATTGAAACCATCTCACTTGTGTTCCCTATAAAGATTGGTCTATTCTGGACAA | 4822 |
| gb:MN996529 | Organism:Severe | CATTTTATTGAAACCATCTCACTTGTGTTCCCTATAAAGATTGGTCTATTCTGGACAA | 4810 |
| gb:MN996531 | Organism:Severe | CATTTTATTGAAACCATCTCACTTGTGTTCCCTATAAAGATTGGTCTATTCTGGACAA | 4809 |
| gb:MT066176 | Organism:Severe | CATTTTATTGAAACCATCTCACTTGTGTTCCCTATAAAGATTGGTCTATTCTGGACAA | 4822 |
| gb:MT027064 | Organism:Severe | CATTTTATTGAAACCATCTCACTTGTGTTCCCTATAAAGATTGGTCTATTCTGGACAA | 4822 |
| gb:MN994468 | Organism:Severe | CATTTTATTGAAACCATCTCACTTGTGTTCCCTATAAAGATTGGTCTATTCTGGACAA | 4822 |
| gb:MT072688 | Organism:Severe | CATTTTATTGAAACCATCTCACTTGTGTTCCCTATAAAGATTGGTCTATTCTGGACAA | 4807 |
| gb:MN996527 | Organism:Severe | CATTTTATTGAAACCATCTCACTTGTGTTCCCTATAAAGATTGGTCTATTCTGGACAA | 4789 |
| gb:MT093631 | Organism:Severe | CATTTTATTGAAACCATCTCACTTGTGTTCCCTATAAAGATTGGTCTATTCTGGACAA | 4860 |
| gb:MT106053 | Organism:Severe | CATTTTATTGAAACCATCTCACTTGTGTTCCCTATAAAGATTGGTCTATTCTGGACAA | 4822 |
| gb:MT019533 | Organism:Severe | CATTTTATTGAAACCATCTCACTTGTGTTCCCTATAAAGATTGGTCTATTCTGGACAA | 4822 |
| gb:MT019531 | Organism:Severe | CATTTTATTGAAACCATCTCACTTGTGTTCCCTATAAAGATTGGTCTATTCTGGACAA | 4822 |
| gb:MN996528 | Organism:Severe | CATTTTATTGAAACCATCTCACTTGTGTTCCCTATAAAGATTGGTCTATTCTGGACAA | 4822 |
| gb:MN996530 | Organism:Severe | CATTTTATTGAAACCATCTCACTTGTGTTCCCTATAAAGATTGGTCTATTCTGGACAA | 4808 |
| gb:MN908947 | Organism:Severe | CATTTTATTGAAACCATCTCACTTGTGTTCCCTATAAAGATTGGTCTATTCTGGACAA | 4822 |
| gb:MT019532 | Organism:Severe | CATTTTATTGAAACCATCTCACTTGTGTTCCCTATAAAGATTGGTCTATTCTGGACAA | 4822 |

\*\*\*\*\*

|             |                 |                                                               |      |
|-------------|-----------------|---------------------------------------------------------------|------|
| gb:MT020781 | Organism:Severe | TCTACACAAC TAGGTATAGAATTTCTTAAGAGAGGTGATAAAAAGTGATATTACACTAGT | 4870 |
| gb:MT007544 | Organism:Severe | TCTACACAAC TAGGTATAGAATTTCTTAAGAGAGGTGATAAAAAGTGATATTACACTAGT | 4882 |
| gb:MN994467 | Organism:Severe | TCTACACAAC TAGGTATAGAATTTCTTAAGAGAGGTGATAAAAAGTGATATTACACTAGT | 4882 |
| gb:MT044257 | Organism:Severe | TCTACACAAC TAGGTATAGAATTTCTTAAGAGAGGTGATAAAAAGTGATATTACACTAGT | 4882 |
| gb:MT106054 | Organism:Severe | TCTACACAAC TAGGTATAGAATTTCTTAAGAGAGGTGATAAAAAGTGATATTACACTAGT | 4882 |
| gb:MT049951 | Organism:Severe | TCTACACAAC TAGGTATAGAATTTCTTAAGAGAGGTGATAAAAAGTGATATTACACTAGT | 4882 |
| gb:MN975262 | Organism:Severe | TCTACACAAC TAGGTATAGAATTTCTTAAGAGAGGTGATAAAAAGTGATATTACACTAGT | 4882 |
| gb:MT106052 | Organism:Severe | TCTACACAAC TAGGTATAGAATTTCTTAAGAGAGGTGATAAAAAGTGATATTACACTAGT | 4882 |
| gb:LC522975 | Organism:Severe | TCTACACAAC TAGGTATAGAATTTCTTAAGAGAGGTGATAAAAAGTGATATTACACTAGT | 4879 |
| gb:LC522973 | Organism:Severe | TCTACACAAC TAGGTATAGAATTTCTTAAGAGAGGTGATAAAAAGTGATATTACACTAGT | 4879 |
| gb:LC522974 | Organism:Severe | TCTACACAAC TAGGTATAGAATTTCTTAAGAGAGGTGATAAAAAGTGATATTACACTAGT | 4879 |
| gb:MN985325 | Organism:Severe | TCTACACAAC TAGGTATAGAATTTCTTAAGAGAGGTGATAAAAAGTGATATTACACTAGT | 4882 |
| gb:MT020881 | Organism:Severe | TCTACACAAC TAGGTATAGAATTTCTTAAGAGAGGTGATAAAAAGTGATATTACACTAGT | 4882 |
| gb:MT020880 | Organism:Severe | TCTACACAAC TAGGTATAGAATTTCTTAAGAGAGGTGATAAAAAGTGATATTACACTAGT | 4882 |
| gb:MT066175 | Organism:Severe | TCTACACAAC TAGGTATAGAATTTCTTAAGAGAGGTGATAAAAAGTGATATTACACTAGT | 4882 |
| gb:MN997409 | Organism:Severe | TCTACACAAC TAGGTATAGAATTTCTTAAGAGAGGTGATAAAAAGTGATATTACACTAGT | 4882 |
| gb:MN938384 | Organism:Severe | TCTACACAAC TAGGTATAGAATTTCTTAAGAGAGGTGATAAAAAGTGATATTACACTAGT | 4850 |
| gb:MT044258 | Organism:Severe | TCTACACAAC TAGGTATAGAATTTCTTAAGAGAGGTGATAAAAAGTGATATTACACTAGT | 4858 |
| gb:MT039890 | Organism:Severe | TCTACACAAC TAGGTATAGAATTTCTTAAGAGAGGTGATAAAAAGTGATATTACACTAGT | 4882 |
| gb:MN988713 | Organism:Severe | TCTACACAAC TAGGTATAGAATTTCTTAAGAGAGGTGATAAAAAGTGATATTACACTAGT | 4882 |
| gb:LC521925 | Organism:Severe | TCTACACAAC TAGGTATAGAATTTCTTAAGAGAGGTGATAAAAAGTGATATTACACTAGT | 4855 |
| gb:MT093571 | Organism:Severe | TCTACACAAC TAGGTATAGAATTTCTTAAGAGAGGTGATAAAAAGTGATATTACACTAGT | 4882 |
| gb:MT039887 | Organism:Severe | TCTACACAAC TAGGTATAGAATTTCTTAAGAGAGGTGATAAAAAGTGATATTACACTAGT | 4882 |
| gb:MT019530 | Organism:Severe | TCTACACAAC TAGGTATAGAATTTCTTAAGAGAGGTGATAAAAAGTGATATTACACTAGT | 4882 |
| gb:MT039888 | Organism:Severe | TCTACACAAC TAGGTATAGAATTTCTTAAGAGAGGTGATAAAAAGTGATATTACACTAGT | 4882 |
| gb:LC522972 | Organism:Severe | TCTACACAAC TAGGTATAGAATTTCTTAAGAGAGGTGATAAAAAGTGATATTACACTAGT | 4879 |
| gb:MT027063 | Organism:Severe | TCTACACAAC TAGGTATAGAATTTCTTAAGAGAGGTGATAAAAAGTGATATTACACTAGT | 4882 |
| gb:MT027062 | Organism:Severe | TCTACACAAC TAGGTATAGAATTTCTTAAGAGAGGTGATAAAAAGTGATATTACACTAGT | 4882 |
| gb:MT019529 | Organism:Severe | TCTACACAAC TAGGTATAGAATTTCTTAAGAGAGGTGATAAAAAGTGATATTACACTAGT | 4882 |
| gb:MN996529 | Organism:Severe | TCTACACAAC TAGGTATAGAATTTCTTAAGAGAGGTGATAAAAAGTGATATTACACTAGT | 4870 |
| gb:MN996531 | Organism:Severe | TCTACACAAC TAGGTATAGAATTTCTTAAGAGAGGTGATAAAAAGTGATATTACACTAGT | 4869 |
| gb:MT066176 | Organism:Severe | TCTACACAAC TAGGTATAGAATTTCTTAAGAGAGGTGATAAAAAGTGATATTACACTAGT | 4882 |
| gb:MT027064 | Organism:Severe | TCTACACAAC TAGGTATAGAATTTCTTAAGAGAGGTGATAAAAAGTGATATTACACTAGT | 4882 |
| gb:MN994468 | Organism:Severe | TCTACACAAC TAGGTATAGAATTTCTTAAGAGAGGTGATAAAAAGTGATATTACACTAGT | 4882 |
| gb:MT072688 | Organism:Severe | TCTACACAAC TAGGTATAGAATTTCTTAAGAGAGGTGATAAAAAGTGATATTACACTAGT | 4867 |
| gb:MN996527 | Organism:Severe | TCTACACAAC TAGGTATAGAATTTCTTAAGAGAGGTGATAAAAAGTGATATTACACTAGT | 4849 |
| gb:MT093631 | Organism:Severe | TCTACACAAC TAGGTATAGAATTTCTTAAGAGAGGTGATAAAAAGTGATATTACACTAGT | 4920 |
| gb:MT106053 | Organism:Severe | TCTACACAAC TAGGTATAGAATTTCTTAAGAGAGGTGATAAAAAGTGATATTACACTAGT | 4882 |
| gb:MT019533 | Organism:Severe | TCTACACAAC TAGGTATAGAATTTCTTAAGAGAGGTGATAAAAAGTGATATTACACTAGT | 4882 |
| gb:MT019531 | Organism:Severe | TCTACACAAC TAGGTATAGAATTTCTTAAGAGAGGTGATAAAAAGTGATATTACACTAGT | 4882 |

|             |                  |                                                                |      |
|-------------|------------------|----------------------------------------------------------------|------|
| gb:MN996528 | Organism: Severe | TCTACACAAC TAGGTATAGAATTTCTTAAGAGAGGTGATAAAAAGTGTATATTACACTAGT | 4882 |
| gb:MN996530 | Organism: Severe | TCTACACAAC TAGGTATAGAATTTCTTAAGAGAGGTGATAAAAAGTGTATATTACACTAGT | 4868 |
| gb:MN908947 | Organism: Severe | TCTACACAAC TAGGTATAGAATTTCTTAAGAGAGGTGATAAAAAGTGTATATTACACTAGT | 4882 |
| gb:MT019532 | Organism: Severe | TCTACACAAC TAGGTATAGAATTTCTTAAGAGAGGTGATAAAAAGTGTATATTACACTAGT | 4882 |
| *****       |                  |                                                                |      |
| gb:MT020781 | Organism: Severe | AATCCTACCACATTCCACCTAGATGGTGAAGTTATCACCTTTGACAATCTTAAGACACTT   | 4930 |
| gb:MT007544 | Organism: Severe | AATCCTACCACATTCCACCTAGATGGTGAAGTTATCACCTTTGACAATCTTAAGACACTT   | 4942 |
| gb:MN994467 | Organism: Severe | AATCCTACCACATTCCACCTAGATGGTGAAGTTATCACCTTTGACAATCTTAAGACACTT   | 4942 |
| gb:MT044257 | Organism: Severe | AATCCTACCACATTCCACCTAGATGGTGAAGTTATCACCTTTGACAATCTTAAGACACTT   | 4942 |
| gb:MT106054 | Organism: Severe | AATCCTACCACATTCCACCTAGATGGTGAAGTTATCACCTTTGACAATCTTAAGACACTT   | 4942 |
| gb:MT049951 | Organism: Severe | AATCCTACCACATTCCACCTAGATGGTGAAGTTATCACCTTTGACAATCTTAAGACACTT   | 4942 |
| gb:MN975262 | Organism: Severe | AATCCTACCACATTCCACCTAGATGGTGAAGTTATCACCTTTGACAATCTTAAGACACTT   | 4942 |
| gb:MT106052 | Organism: Severe | AATCCTACCACATTCCACCTAGATGGTGAAGTTATCACCTTTGACAATCTTAAGACACTT   | 4942 |
| gb:LC522975 | Organism: Severe | AATCCTACCACATTCCACCTAGATGGTGAAGTTATCACCTTTGACAATCTTAAGACACTT   | 4939 |
| gb:LC522973 | Organism: Severe | AATCCTACCACATTCCACCTAGATGGTGAAGTTATCACCTTTGACAATCTTAAGACACTT   | 4939 |
| gb:LC522974 | Organism: Severe | AATCCTACCACATTCCACCTAGATGGTGAAGTTATCACCTTTGACAATCTTAAGACACTT   | 4939 |
| gb:MN985325 | Organism: Severe | AATCCTACCACATTCCACCTAGATGGTGAAGTTATCACCTTTGACAATCTTAAGACACTT   | 4942 |
| gb:MT020881 | Organism: Severe | AATCCTACCACATTCCACCTAGATGGTGAAGTTATCACCTTTGACAATCTTAAGACACTT   | 4942 |
| gb:MT020880 | Organism: Severe | AATCCTACCACATTCCACCTAGATGGTGAAGTTATCACCTTTGACAATCTTAAGACACTT   | 4942 |
| gb:MT066175 | Organism: Severe | AATCCTACCACATTCCACCTAGATGGTGAAGTTATCACCTTTGACAATCTTAAGACACTT   | 4942 |
| gb:MN997409 | Organism: Severe | AATCCTACCACATTCCACCTAGATGGTGAAGTTATCACCTTTGACAATCTTAAGACACTT   | 4942 |
| gb:MN938384 | Organism: Severe | AATCCTACCACATTCCACCTAGATGGTGAAGTTATCACCTTTGACAATCTTAAGACACTT   | 4910 |
| gb:MT044258 | Organism: Severe | AATCCTACCACATTCCACCTAGATGGTGAAGTTATCACCTTTGACAATCTTAAGACACTT   | 4918 |
| gb:MT039890 | Organism: Severe | AATCCTACCACATTCCACCTAGATGGTGAAGTTATCACCTTTGACAATCTTAAGACACTT   | 4942 |
| gb:MN988713 | Organism: Severe | AATCCTACCACATTCCACCTAGATGGTGAAGTTATCACCTTTGACAATCTTAAGACACTT   | 4942 |
| gb:LC521925 | Organism: Severe | AATCCTACCACATTCCACCTAGATGGTGAAGTTATCACCTTTGACAATCTTAAGACACTT   | 4915 |
| gb:MT093571 | Organism: Severe | AATCCTACCACATTCCACCTAGATGGTGAAGTTATCACCTTTGACAATCTTAAGACACTT   | 4942 |
| gb:MT039887 | Organism: Severe | AATCCTACCACATTCCACCTAGATGGTGAAGTTATCACCTTTGACAATCTTAAGACACTT   | 4942 |
| gb:MT019530 | Organism: Severe | AATCCTACCACATTCCACCTAGATGGTGAAGTTATCACCTTTGACAATCTTAAGACACTT   | 4942 |
| gb:MT039888 | Organism: Severe | AATCCTACCACATTCCACCTAGATGGTGAAGTTATCACCTTTGACAATCTTAAGACACTT   | 4942 |
| gb:LC522972 | Organism: Severe | AATCCTACCACATTCCACCTAGATGGTGAAGTTATCACCTTTGACAATCTTAAGACACTT   | 4939 |
| gb:MT027063 | Organism: Severe | AATCCTACCACATTCCACCTAGATGGTGAAGTTATCACCTTTGACAATCTTAAGACACTT   | 4942 |
| gb:MT027062 | Organism: Severe | AATCCTACCACATTCCACCTAGATGGTGAAGTTATCACCTTTGACAATCTTAAGACACTT   | 4942 |
| gb:MT019529 | Organism: Severe | AATCCTACCACATTCCACCTAGATGGTGAAGTTATCACCTTTGACAATCTTAAGACACTT   | 4942 |
| gb:MN996529 | Organism: Severe | AATCCTACCACATTCCACCTAGATGGTGAAGTTATCACCTTTGACAATCTTAAGACACTT   | 4930 |
| gb:MN996531 | Organism: Severe | AATCCTACCACATTCCACCTAGATGGTGAAGTTATCACCTTTGACAATCTTAAGACACTT   | 4929 |
| gb:MT066176 | Organism: Severe | AATCCTACCACATTCCACCTAGATGGTGAAGTTATCACCTTTGACAATCTTAAGACACTT   | 4942 |
| gb:MT027064 | Organism: Severe | AATCCTACCACATTCCACCTAGATGGTGAAGTTATCACCTTTGACAATCTTAAGACACTT   | 4942 |
| gb:MN994468 | Organism: Severe | AATCCTACCACATTCCACCTAGATGGTGAAGTTATCACCTTTGACAATCTTAAGACACTT   | 4942 |
| gb:MT072688 | Organism: Severe | AATCCTACCACATTCCACCTAGATGGTGAAGTTATCACCTTTGACAATCTTAAGACACTT   | 4927 |
| gb:MN996527 | Organism: Severe | AATCCTACCACATTCCACCTAGATGGTGAAGTTATCACCTTTGACAATCTTAAGACACTT   | 4909 |
| gb:MT093631 | Organism: Severe | AATCCTACCACATTCCACCTAGATGGTGAAGTTATCACCTTTGACAATCTTAAGACACTT   | 4980 |
| gb:MT106053 | Organism: Severe | AATCCTACCACATTCCACCTAGATGGTGAAGTTATCACCTTTGACAATCTTAAGACACTT   | 4942 |
| gb:MT019533 | Organism: Severe | AATCCTACCACATTCCACCTAGATGGTGAAGTTATCACCTTTGACAATCTTAAGACACTT   | 4942 |
| gb:MT019531 | Organism: Severe | AATCCTACCACATTCCACCTAGATGGTGAAGTTATCACCTTTGACAATCTTAAGACACTT   | 4942 |
| gb:MN996528 | Organism: Severe | AATCCTACCACATTCCACCTAGATGGTGAAGTTATCACCTTTGACAATCTTAAGACACTT   | 4942 |
| gb:MN996530 | Organism: Severe | AATCCTACCACATTCCACCTAGATGGTGAAGTTATCACCTTTGACAATCTTAAGACACTT   | 4928 |
| gb:MN908947 | Organism: Severe | AATCCTACCACATTCCACCTAGATGGTGAAGTTATCACCTTTGACAATCTTAAGACACTT   | 4942 |
| gb:MT019532 | Organism: Severe | AATCCTACCACATTCCACCTAGATGGTGAAGTTATCACCTTTGACAATCTTAAGACACTT   | 4942 |
| *****       |                  |                                                                |      |
| gb:MT020781 | Organism: Severe | CTTTCTTTGAGAGAAGTGAGGACTATTAAGGTGTTTACAACAGTAGACAACATTAACCTC   | 4990 |
| gb:MT007544 | Organism: Severe | CTTTCTTTGAGAGAAGTGAGGACTATTAAGGTGTTTACAACAGTAGACAACATTAACCTC   | 5002 |
| gb:MN994467 | Organism: Severe | CTTTCTTTGAGAGAAGTGAGGACTATTAAGGTGTTTACAACAGTAGACAACATTAACCTC   | 5002 |
| gb:MT044257 | Organism: Severe | CTTTCTTTGAGAGAAGTGAGGACTATTAAGGTGTTTACAACAGTAGACAACATTAACCTC   | 5002 |
| gb:MT106054 | Organism: Severe | CTTTCTTTGAGAGAAGTGAGGACTATTAAGGTGTTTACAACAGTAGACAACATTAACCTC   | 5002 |
| gb:MT049951 | Organism: Severe | CTTTCTTTGAGAGAAGTGAGGACTATTAAGGTGTTTACAACAGTAGACAACATTAACCTC   | 5002 |
| gb:MN975262 | Organism: Severe | CTTTCTTTGAGAGAAGTGAGGACTATTAAGGTGTTTACAACAGTAGACAACATTAACCTC   | 5002 |
| gb:MT106052 | Organism: Severe | CTTTCTTTGAGAGAAGTGAGGACTATTAAGGTGTTTACAACAGTAGACAACATTAACCTC   | 5002 |
| gb:LC522975 | Organism: Severe | CTTTCTTTGAGAGAAGTGAGGACTATTAAGGTGTTTACAACAGTAGACAACATTAACCTC   | 4999 |
| gb:LC522973 | Organism: Severe | CTTTCTTTGAGAGAAGTGAGGACTATTAAGGTGTTTACAACAGTAGACAACATTAACCTC   | 4999 |
| gb:LC522974 | Organism: Severe | CTTTCTTTGAGAGAAGTGAGGACTATTAAGGTGTTTACAACAGTAGACAACATTAACCTC   | 4999 |
| gb:MN985325 | Organism: Severe | CTTTCTTTGAGAGAAGTGAGGACTATTAAGGTGTTTACAACAGTAGACAACATTAACCTC   | 5002 |
| gb:MT020881 | Organism: Severe | CTTTCTTTGAGAGAAGTGAGGACTATTAAGGTGTTTACAACAGTAGACAACATTAACCTC   | 5002 |

|             |                 |                                                             |      |
|-------------|-----------------|-------------------------------------------------------------|------|
| gb:MT020880 | Organism:Severe | CTTCTTTGAGAGAAGTGAGGACTATTAAGGTGTTTACAACAGTAGACAACATTAACCTC | 5002 |
| gb:MT066175 | Organism:Severe | CTTCTTTGAGAGAAGTGAGGACTATTAAGGTGTTTACAACAGTAGACAACATTAACCTC | 5002 |
| gb:MN997409 | Organism:Severe | CTTCTTTGAGAGAAGTGAGGACTATTAAGGTGTTTACAACAGTAGACAACATTAACCTC | 5002 |
| gb:MN938384 | Organism:Severe | CTTCTTTGAGAGAAGTGAGGACTATTAAGGTGTTTACAACAGTAGACAACATTAACCTC | 4970 |
| gb:MT044258 | Organism:Severe | CTTCTTTGAGAGAAGTGAGGACTATTAAGGTGTTTACAACAGTAGACAACATTAACCTC | 4978 |
| gb:MT039890 | Organism:Severe | CTTCTTTGAGAGAAGTGAGGACTATTAAGGTGTTTACAACAGTAGACAACATTAACCTC | 5002 |
| gb:MN988713 | Organism:Severe | CTTCTTTGAGAGAAGTGAGGACTATTAAGGTGTTTACAACAGTAGACAACATTAACCTC | 5002 |
| gb:LC521925 | Organism:Severe | CTTCTTTGAGAGAAGTGAGGACTATTAAGGTGTTTACAACAGTAGACAACATTAACCTC | 4975 |
| gb:MT093571 | Organism:Severe | CTTCTTTGAGAGAAGTGAGGACTATTAAGGTGTTTACAACAGTAGACAACATTAACCTC | 5002 |
| gb:MT039887 | Organism:Severe | CTTCTTTGAGAGAAGTGAGGACTATTAAGGTGTTTACAACAGTAGACAACATTAACCTC | 5002 |
| gb:MT019530 | Organism:Severe | CTTCTTTGAGAGAAGTGAGGACTATTAAGGTGTTTACAACAGTAGACAACATTAACCTC | 5002 |
| gb:MT039888 | Organism:Severe | CTTCTTTGAGAGAAGTGAGGACTATTAAGGTGTTTACAACAGTAGACAACATTAACCTC | 5002 |
| gb:LC522972 | Organism:Severe | CTTCTTTGAGAGAAGTGAGGACTATTAAGGTGTTTACAACAGTAGACAACATTAACCTC | 4999 |
| gb:MT027063 | Organism:Severe | CTTCTTTGAGAGAAGTGAGGACTATTAAGGTGTTTACAACAGTAGACAACATTAACCTC | 5002 |
| gb:MT027062 | Organism:Severe | CTTCTTTGAGAGAAGTGAGGACTATTAAGGTGTTTACAACAGTAGACAACATTAACCTC | 5002 |
| gb:MT019529 | Organism:Severe | CTTCTTTGAGAGAAGTGAGGACTATTAAGGTGTTTACAACAGTAGACAACATTAACCTC | 5002 |
| gb:MN996529 | Organism:Severe | CTTCTTTGAGAGAAGTGAGGACTATTAAGGTGTTTACAACAGTAGACAACATTAACCTC | 4990 |
| gb:MN996531 | Organism:Severe | CTTCTTTGAGAGAAGTGAGGACTATTAAGGTGTTTACAACAGTAGACAACATTAACCTC | 4989 |
| gb:MT066176 | Organism:Severe | CTTCTTTGAGAGAAGTGAGGACTATTAAGGTGTTTACAACAGTAGACAACATTAACCTC | 5002 |
| gb:MT027064 | Organism:Severe | CTTCTTTGAGAGAAGTGAGGACTATTAAGGTGTTTACAACAGTAGACAACATTAACCTC | 5002 |
| gb:MN994468 | Organism:Severe | CTTCTTTGAGAGAAGTGAGGACTATTAAGGTGTTTACAACAGTAGACAACATTAACCTC | 5002 |
| gb:MT072688 | Organism:Severe | CTTCTTTGAGAGAAGTGAGGACTATTAAGGTGTTTACAACAGTAGACAACATTAACCTC | 4987 |
| gb:MN996527 | Organism:Severe | CTTCTTTGAGAGAAGTGAGGACTATTAAGGTGTTTACAACAGTAGACAACATTAACCTC | 4969 |
| gb:MT093631 | Organism:Severe | CTTCTTTGAGAGAAGTGAGGACTATTAAGGTGTTTACAACAGTAGACAACATTAACCTC | 5040 |
| gb:MT106053 | Organism:Severe | CTTCTTTGAGAGAAGTGAGGACTATTAAGGTGTTTACAACAGTAGACAACATTAACCTC | 5002 |
| gb:MT019533 | Organism:Severe | CTTCTTTGAGAGAAGTGAGGACTATTAAGGTGTTTACAACAGTAGACAACATTAACCTC | 5002 |
| gb:MT019531 | Organism:Severe | CTTCTTTGAGAGAAGTGAGGACTATTAAGGTGTTTACAACAGTAGACAACATTAACCTC | 5002 |
| gb:MN996528 | Organism:Severe | CTTCTTTGAGAGAAGTGAGGACTATTAAGGTGTTTACAACAGTAGACAACATTAACCTC | 5002 |
| gb:MN996530 | Organism:Severe | CTTCTTTGAGAGAAGTGAGGACTATTAAGGTGTTTACAACAGTAGACAACATTAACCTC | 4988 |
| gb:MN908947 | Organism:Severe | CTTCTTTGAGAGAAGTGAGGACTATTAAGGTGTTTACAACAGTAGACAACATTAACCTC | 5002 |
| gb:MT019532 | Organism:Severe | CTTCTTTGAGAGAAGTGAGGACTATTAAGGTGTTTACAACAGTAGACAACATTAACCTC | 5002 |

\*\*\*\*\*

|             |                 |                                                             |      |
|-------------|-----------------|-------------------------------------------------------------|------|
| gb:MT020781 | Organism:Severe | CACACGCAAGTTGTGGACATGTCAATGACATATGGACAACAGTTTGGTCCAACCTATTG | 5050 |
| gb:MT007544 | Organism:Severe | CACACGCAAGTTGTGGACATGTCAATGACATATGGACAACAGTTTGGTCCAACCTATTG | 5062 |
| gb:MN994467 | Organism:Severe | CACACGCAAGTTGTGGACATGTCAATGACATATGGACAACAGTTTGGTCCAACCTATTG | 5062 |
| gb:MT044257 | Organism:Severe | CACACGCAAGTTGTGGACATGTCAATGACATATGGACAACAGTTTGGTCCAACCTATTG | 5062 |
| gb:MT106054 | Organism:Severe | CACACGCAAGTTGTGGACATGTCAATGACATATGGACAACAGTTTGGTCCAACCTATTG | 5062 |
| gb:MT049951 | Organism:Severe | CACACGCAAGTTGTGGACATGTCAATGACATATGGACAACAGTTTGGTCCAACCTATTG | 5062 |
| gb:MN975262 | Organism:Severe | CACACGCAAGTTGTGGACATGTCAATGACATATGGACAACAGTTTGGTCCAACCTATTG | 5062 |
| gb:MT106052 | Organism:Severe | CACACGCAAGTTGTGGACATGTCAATGACATATGGACAACAGTTTGGTCCAACCTATTG | 5062 |
| gb:LC522975 | Organism:Severe | CACACGCAAGTTGTGGACATGTCAATGACATATGGACAACAGTTTGGTCCAACCTATTG | 5059 |
| gb:LC522973 | Organism:Severe | CACACGCAAGTTGTGGACATGTCAATGACATATGGACAACAGTTTGGTCCAACCTATTG | 5059 |
| gb:LC522974 | Organism:Severe | CACACGCAAGTTGTGGACATGTCAATGACATATGGACAACAGTTTGGTCCAACCTATTG | 5059 |
| gb:MN985325 | Organism:Severe | CACACGCAAGTTGTGGACATGTCAATGACATATGGACAACAGTTTGGTCCAACCTATTG | 5062 |
| gb:MT020881 | Organism:Severe | CACACGCAAGTTGTGGACATGTCAATGACATATGGACAACAGTTTGGTCCAACCTATTG | 5062 |
| gb:MT020880 | Organism:Severe | CACACGCAAGTTGTGGACATGTCAATGACATATGGACAACAGTTTGGTCCAACCTATTG | 5062 |
| gb:MT066175 | Organism:Severe | CACACGCAAGTTGTGGACATGTCAATGACATATGGACAACAGTTTGGTCCAACCTATTG | 5062 |
| gb:MN997409 | Organism:Severe | CACACGCAAGTTGTGGACATGTCAATGACATATGGACAACAGTTTGGTCCAACCTATTG | 5062 |
| gb:MN938384 | Organism:Severe | CACACGCAAGTTGTGGACATGTCAATGACATATGGACAACAGTTTGGTCCAACCTATTG | 5062 |
| gb:MT044258 | Organism:Severe | CACACGCAAGTTGTGGACATGTCAATGACATATGGACAACAGTTTGGTCCAACCTATTG | 5030 |
| gb:MT039890 | Organism:Severe | CACACGCAAGTTGTGGACATGTCAATGACATATGGACAACAGTTTGGTCCAACCTATTG | 5038 |
| gb:MN988713 | Organism:Severe | CACACGCAAGTTGTGGACATGTCAATGACATATGGACAACAGTTTGGTCCAACCTATTG | 5062 |
| gb:LC521925 | Organism:Severe | CACACGCAAGTTGTGGACATGTCAATGACATATGGACAACAGTTTGGTCCAACCTATTG | 5062 |
| gb:MT093571 | Organism:Severe | CACACGCAAGTTGTGGACATGTCAATGACATATGGACAACAGTTTGGTCCAACCTATTG | 5035 |
| gb:MT039887 | Organism:Severe | CACACGCAAGTTGTGGACATGTCAATGACATATGGACAACAGTTTGGTCCAACCTATTG | 5062 |
| gb:MT019530 | Organism:Severe | CACACGCAAGTTGTGGACATGTCAATGACATATGGACAACAGTTTGGTCCAACCTATTG | 5062 |
| gb:MT039888 | Organism:Severe | CACACGCAAGTTGTGGACATGTCAATGACATATGGACAACAGTTTGGTCCAACCTATTG | 5062 |
| gb:LC522972 | Organism:Severe | CACACGCAAGTTGTGGACATGTCAATGACATATGGACAACAGTTTGGTCCAACCTATTG | 5062 |
| gb:MT027063 | Organism:Severe | CACACGCAAGTTGTGGACATGTCAATGACATATGGACAACAGTTTGGTCCAACCTATTG | 5059 |
| gb:MT027062 | Organism:Severe | CACACGCAAGTTGTGGACATGTCAATGACATATGGACAACAGTTTGGTCCAACCTATTG | 5062 |
| gb:MT019529 | Organism:Severe | CACACGCAAGTTGTGGACATGTCAATGACATATGGACAACAGTTTGGTCCAACCTATTG | 5062 |
| gb:MN996529 | Organism:Severe | CACACGCAAGTTGTGGACATGTCAATGACATATGGACAACAGTTTGGTCCAACCTATTG | 5062 |
| gb:MN996531 | Organism:Severe | CACACGCAAGTTGTGGACATGTCAATGACATATGGACAACAGTTTGGTCCAACCTATTG | 5050 |
| gb:MT066176 | Organism:Severe | CACACGCAAGTTGTGGACATGTCAATGACATATGGACAACAGTTTGGTCCAACCTATTG | 5049 |

|             |                 |                                                              |      |
|-------------|-----------------|--------------------------------------------------------------|------|
| gb:MT027064 | Organism:Severe | CACACGCAAGTTGTGGACATGTCAATGACATATGGACAACAGTTTGGTCCAACCTATTTG | 5062 |
| gb:MN994468 | Organism:Severe | CACACGCAAGTTGTGGACATGTCAATGACATATGGACAACAGTTTGGTCCAACCTATTTG | 5062 |
| gb:MT072688 | Organism:Severe | CACACGCAAGTTGTGGACATGTCAATGACATATGGACAACAGTTTGGTCCAACCTATTTG | 5047 |
| gb:MN996527 | Organism:Severe | CACACGCAAGTTGTGGACATGTCAATGACATATGGACAACAGTTTGGTCCAACCTATTTG | 5029 |
| gb:MT093631 | Organism:Severe | CACACGCAAGTTGTGGACATGTCAATGACATATGGACAACAGTTTGGTCCAACCTATTTG | 5100 |
| gb:MT106053 | Organism:Severe | CACACGCAAGTTGTGGACATGTCAATGACATATGGACAACAGTTTGGTCCAACCTATTTG | 5062 |
| gb:MT019533 | Organism:Severe | CACACGCAAGTTGTGGACATGTCAATGACATATGGACAACAGTTTGGTCCAACCTATTTG | 5062 |
| gb:MT019531 | Organism:Severe | CACACGCAAGTTGTGGACATGTCAATGACATATGGACAACAGTTTGGTCCAACCTATTTG | 5062 |
| gb:MN996528 | Organism:Severe | CACACGCAAGTTGTGGACATGTCAATGACATATGGACAACAGTTTGGTCCAACCTATTTG | 5062 |
| gb:MN996530 | Organism:Severe | CACACGCAAGTTGTGGACATGTCAATGACATATGGACAACAGTTTGGTCCAACCTATTTG | 5048 |
| gb:MN908947 | Organism:Severe | CACACGCAAGTTGTGGACATGTCAATGACATATGGACAACAGTTTGGTCCAACCTATTTG | 5062 |
| gb:MT019532 | Organism:Severe | CACACGCAAGTTGTGGACATGTCAATGACATATGGACAACAGTTTGGTCCAACCTATTTG | 5062 |

\*\*\*\*\*

|             |                 |                                                              |      |
|-------------|-----------------|--------------------------------------------------------------|------|
| gb:MT020781 | Organism:Severe | GATGGAGCTGATGTTACTAAAATAAAACCTCATAATTCACATGAAGGTTAAACATTTTAT | 5110 |
| gb:MT007544 | Organism:Severe | GATGGAGCTGATGTTACTAAAATAAAACCTCATAATTCACATGAAGGTTAAACATTTTAT | 5122 |
| gb:MN994467 | Organism:Severe | GATGGAGCTGATGTTACTAAAATAAAACCTCATAATTCACATGAAGGTTAAACATTTTAT | 5122 |
| gb:MT044257 | Organism:Severe | GATGGAGCTGATGTTACTAAAATAAAACCTCATAATTCACATGAAGGTTAAACATTTTAT | 5122 |
| gb:MT106054 | Organism:Severe | GATGGAGCTGATGTTACTAAAATAAAACCTCATAATTCACATGAAGGTTAAACATTTTAT | 5122 |
| gb:MT049951 | Organism:Severe | GATGGAGCTGATGTTACTAAAATAAAACCTCATAATTCACATGAAGGTTAAACATTTTAT | 5122 |
| gb:MN975262 | Organism:Severe | GATGGAGCTGATGTTACTAAAATAAAACCTCATAATTCACATGAAGGTTAAACATTTTAT | 5122 |
| gb:MT106052 | Organism:Severe | GATGGAGCTGATGTTACTAAAATAAAACCTCATAATTCACATGAAGGTTAAACATTTTAT | 5122 |
| gb:LC522975 | Organism:Severe | GATGGAGCTGATGTTACTAAAATAAAACCTCATAATTCACATGAAGGTTAAACATTTTAT | 5119 |
| gb:LC522973 | Organism:Severe | GATGGAGCTGATGTTACTAAAATAAAACCTCATAATTCACATGAAGGTTAAACATTTTAT | 5119 |
| gb:LC522974 | Organism:Severe | GATGGAGCTGATGTTACTAAAATAAAACCTCATAATTCACATGAAGGTTAAACATTTTAT | 5119 |
| gb:MN985325 | Organism:Severe | GATGGAGCTGATGTTACTAAAATAAAACCTCATAATTCACATGAAGGTTAAACATTTTAT | 5122 |
| gb:MT020881 | Organism:Severe | GATGGAGCTGATGTTACTAAAATAAAACCTCATAATTCACATGAAGGTTAAACATTTTAT | 5122 |
| gb:MT020880 | Organism:Severe | GATGGAGCTGATGTTACTAAAATAAAACCTCATAATTCACATGAAGGTTAAACATTTTAT | 5122 |
| gb:MT066175 | Organism:Severe | GATGGAGCTGATGTTACTAAAATAAAACCTCATAATTCACATGAAGGTTAAACATTTTAT | 5122 |
| gb:MN997409 | Organism:Severe | GATGGAGCTGATGTTACTAAAATAAAACCTCATAATTCACATGAAGGTTAAACATTTTAT | 5122 |
| gb:MN938384 | Organism:Severe | GATGGAGCTGATGTTACTAAAATAAAACCTCATAATTCACATGAAGGTTAAACATTTTAT | 5090 |
| gb:MT044258 | Organism:Severe | GATGGAGCTGATGTTACTAAAATAAAACCTCATAATTCACATGAAGGTTAAACATTTTAT | 5098 |
| gb:MT039890 | Organism:Severe | GATGGAGCTGATGTTACTAAAATAAAACCTCATAATTCACATGAAGGTTAAACATTTTAT | 5122 |
| gb:MN988713 | Organism:Severe | GATGGAGCTGATGTTACTAAAATAAAACCTCATAATTCACATGAAGGTTAAACATTTTAT | 5122 |
| gb:LC521925 | Organism:Severe | GATGGAGCTGATGTTACTAAAATAAAACCTCATAATTCACATGAAGGTTAAACATTTTAT | 5095 |
| gb:MT093571 | Organism:Severe | GATGGAGCTGATGTTACTAAAATAAAACCTCATAATTCACATGAAGGTTAAACATTTTAT | 5122 |
| gb:MT039887 | Organism:Severe | GATGGAGCTGATGTTACTAAAATAAAACCTCATAATTCACATGAAGGTTAAACATTTTAT | 5122 |
| gb:MT019530 | Organism:Severe | GATGGAGCTGATGTTACTAAAATAAAACCTCATAATTCACATGAAGGTTAAACATTTTAT | 5122 |
| gb:MT039888 | Organism:Severe | GATGGAGCTGATGTTACTAAAATAAAACCTCATAATTCACATGAAGGTTAAACATTTTAT | 5122 |
| gb:LC522972 | Organism:Severe | GATGGAGCTGATGTTACTAAAATAAAACCTCATAATTCACATGAAGGTTAAACATTTTAT | 5119 |
| gb:MT027063 | Organism:Severe | GATGGAGCTGATGTTACTAAAGTAAAACCTCATAATTCACATGAAGGTTAAACATTTTAT | 5122 |
| gb:MT027062 | Organism:Severe | GATGGAGCTGATGTTACTAAAGTAAAACCTCATAATTCACATGAAGGTTAAACATTTTAT | 5122 |
| gb:MT019529 | Organism:Severe | GATGGAGCTGATGTTACTAAAATAAAACCTCATAATTCACATGAAGGTTAAACATTTTAT | 5122 |
| gb:MN996529 | Organism:Severe | GATGGAGCTGATGTTACTAAAATAAAACCTCATAATTCACATGAAGGTTAAACATTTTAT | 5110 |
| gb:MN996531 | Organism:Severe | GATGGAGCTGATGTTACTAAAATAAAACCTCATAATTCACATGAAGGTTAAACATTTTAT | 5109 |
| gb:MT066176 | Organism:Severe | GATGGAGCTGATGTTACTAAAATAAAACCTCATAATTCACATGAAGGTTAAACATTTTAT | 5122 |
| gb:MT027064 | Organism:Severe | GATGGAGCTGATGTTACTAAAATAAAACCTCATAATTCACATGAAGGTTAAACATTTTAT | 5122 |
| gb:MN994468 | Organism:Severe | GATGGAGCTGATGTTACTAAAATAAAACCTCATAATTCACATGAAGGTTAAACATTTTAT | 5122 |
| gb:MT072688 | Organism:Severe | GATGGAGCTGATGTTACTAAAATAAAACCTCATAATTCACATGAAGGTTAAACATTTTAT | 5107 |
| gb:MN996527 | Organism:Severe | GATGGAGCTGATGTTACTAAAATAAAACCTCATAATTCACATGAAGGTTAAACATTTTAT | 5089 |
| gb:MT093631 | Organism:Severe | GATGGAGCTGATGTTACTAAAATAAAACCTCATAATTCACATGAAGGTTAAACATTTTAT | 5160 |
| gb:MT106053 | Organism:Severe | GATGGAGCTGATGTTACTAAAATAAAACCTCATAATTCACATGAAGGTTAAACATTTTAT | 5122 |
| gb:MT019533 | Organism:Severe | GATGGAGCTGATGTTACTAAAATAAAACCTCATAATTCACATGAAGGTTAAACATTTTAT | 5122 |
| gb:MT019531 | Organism:Severe | GATGGAGCTGATGTTACTAAAATAAAACCTCATAATTCACATGAAGGTTAAACATTTTAT | 5122 |
| gb:MN996528 | Organism:Severe | GATGGAGCTGATGTTACTAAAATAAAACCTCATAATTCACATGAAGGTTAAACATTTTAT | 5122 |
| gb:MN996530 | Organism:Severe | GATGGAGCTGATGTTACTAAAATAAAACCTCATAATTCACATGAAGGTTAAACATTTTAT | 5108 |
| gb:MN908947 | Organism:Severe | GATGGAGCTGATGTTACTAAAATAAAACCTCATAATTCACATGAAGGTTAAACATTTTAT | 5122 |
| gb:MT019532 | Organism:Severe | GATGGAGCTGATGTTACTAAAATAAAACCTCATAATTCACATGAAGGTTAAACATTTTAT | 5122 |

\*\*\*\*\*

|             |                 |                                                               |      |
|-------------|-----------------|---------------------------------------------------------------|------|
| gb:MT020781 | Organism:Severe | GTTTTACCTAATGATGACACTCTACGTGTTGAGGCTTTTGAGTACTACCACACAACCTGAT | 5170 |
| gb:MT007544 | Organism:Severe | GTTTTACCTAATGATGACACTCTACGTGTTGAGGCTTTTGAGTACTACCACACAACCTGAT | 5182 |
| gb:MN994467 | Organism:Severe | GTTTTACCTAATGATGACACTCTACGTGTTGAGGCTTTTGAGTACTACCACACAACCTGAT | 5182 |
| gb:MT044257 | Organism:Severe | GTTTTACCTAATGATGACACTCTACGTGTTGAGGCTTTTGAGTACTACCACACAACCTGAT | 5182 |
| gb:MT106054 | Organism:Severe | GTTTTACCTAATGATGACACTCTACGTGTTGAGGCTTTTGAGTACTACCACACAACCTGAT | 5182 |

|             |                 |                                                        |      |
|-------------|-----------------|--------------------------------------------------------|------|
| gb:MT049951 | Organism:Severe | GTTTTACCTAATGATGACACTCTACGTGTTGAGGCTTTTGAGTACTACCACACA | 5182 |
| gb:MN975262 | Organism:Severe | GTTTTACCTAATGATGACACTCTACGTGTTGAGGCTTTTGAGTACTACCACACA | 5182 |
| gb:MT106052 | Organism:Severe | GTTTTACCTAATGATGACACTCTACGTGTTGAGGCTTTTGAGTACTACCACACA | 5182 |
| gb:LC522975 | Organism:Severe | GTTTTACCTAATGATGACACTCTACGTGTTGAGGCTTTTGAGTACTACCACACA | 5179 |
| gb:LC522973 | Organism:Severe | GTTTTACCTAATGATGACACTCTACGTGTTGAGGCTTTTGAGTACTACCACACA | 5179 |
| gb:LC522974 | Organism:Severe | GTTTTACCTAATGATGACACTCTACGTGTTGAGGCTTTTGAGTACTACCACACA | 5179 |
| gb:MN985325 | Organism:Severe | GTTTTACCTAATGATGACACTCTACGTGTTGAGGCTTTTGAGTACTACCACACA | 5182 |
| gb:MT020881 | Organism:Severe | GTTTTACCTAATGATGACACTCTACGTGTTGAGGCTTTTGAGTACTACCACACA | 5182 |
| gb:MT020880 | Organism:Severe | GTTTTACCTAATGATGACACTCTACGTGTTGAGGCTTTTGAGTACTACCACACA | 5182 |
| gb:MT066175 | Organism:Severe | GTTTTACCTAATGATGACACTCTACGTGTTGAGGCTTTTGAGTACTACCACACA | 5182 |
| gb:MN997409 | Organism:Severe | GTTTTACCTAATGATGACACTCTACGTGTTGAGGCTTTTGAGTACTACCACACA | 5182 |
| gb:MN938384 | Organism:Severe | GTTTTACCTAATGATGACACTCTACGTGTTGAGGCTTTTGAGTACTACCACACA | 5150 |
| gb:MT044258 | Organism:Severe | GTTTTACCTAATGATGACACTCTACGTGTTGAGGCTTTTGAGTACTACCACACA | 5158 |
| gb:MT039890 | Organism:Severe | GTTTTACCTAATGATGACACTCTACGTGTTGAGGCTTTTGAGTACTACCACACA | 5182 |
| gb:MN988713 | Organism:Severe | GTTTTACCTAATGATGACACTCTACGTGTTGAGGCTTTTGAGTACTACCACACA | 5182 |
| gb:LC521925 | Organism:Severe | GTTTTACCTAATGATGACACTCTACGTGTTGAGGCTTTTGAGTACTACCACACA | 5155 |
| gb:MT093571 | Organism:Severe | GTTTTACCTAATGATGACACTCTACGTGTTGAGGCTTTTGAGTACTACCACACA | 5182 |
| gb:MT039887 | Organism:Severe | GTTTTACCTAATGATGACACTCTACGTGTTGAGGCTTTTGAGTACTACCACACA | 5182 |
| gb:MT019530 | Organism:Severe | GTTTTACCTAATGATGACACTCTACGTGTTGAGGCTTTTGAGTACTACCACACA | 5182 |
| gb:MT039888 | Organism:Severe | GTTTTACCTAATGATGACACTCTACGTGTTGAGGCTTTTGAGTACTACCACACA | 5182 |
| gb:LC522972 | Organism:Severe | GTTTTACCTAATGATGACACTCTACGTGTTGAGGCTTTTGAGTACTACCACACA | 5179 |
| gb:MT027063 | Organism:Severe | GTTTTACCTAATGATGACACTCTACGTGTTGAGGCTTTTGAGTACTACCACACA | 5182 |
| gb:MT027062 | Organism:Severe | GTTTTACCTAATGATGACACTCTACGTGTTGAGGCTTTTGAGTACTACCACACA | 5182 |
| gb:MT019529 | Organism:Severe | GTTTTACCTAATGATGACACTCTACGTGTTGAGGCTTTTGAGTACTACCACACA | 5182 |
| gb:MN996529 | Organism:Severe | GTTTTACCTAATGATGACACTCTACGTGTTGAGGCTTTTGAGTACTACCACACA | 5170 |
| gb:MN996531 | Organism:Severe | GTTTTACCTAATGATGACACTCTACGTGTTGAGGCTTTTGAGTACTACCACACA | 5169 |
| gb:MT066176 | Organism:Severe | GTTTTACCTAATGATGACACTCTACGTGTTGAGGCTTTTGAGTACTACCACACA | 5182 |
| gb:MT027064 | Organism:Severe | GTTTTACCTAATGATGACACTCTACGTGTTGAGGCTTTTGAGTACTACCACACA | 5182 |
| gb:MN994468 | Organism:Severe | GTTTTACCTAATGATGACACTCTACGTGTTGAGGCTTTTGAGTACTACCACACA | 5182 |
| gb:MT072688 | Organism:Severe | GTTTTACCTAATGATGACACTCTACGTGTTGAGGCTTTTGAGTACTACCACACA | 5167 |
| gb:MN996527 | Organism:Severe | GTTTTACCTAATGATGACACTCTACGTGTTGAGGCTTTTGAGTACTACCACACA | 5149 |
| gb:MT093631 | Organism:Severe | GTTTTACCTAATGATGACACTCTACGTGTTGAGGCTTTTGAGTACTACCACACA | 5220 |
| gb:MT106053 | Organism:Severe | GTTTTACCTAATGATGACACTCTACGTGTTGAGGCTTTTGAGTACTACCACACA | 5182 |
| gb:MT019533 | Organism:Severe | GTTTTACCTAATGATGACACTCTACGTGTTGAGGCTTTTGAGTACTACCACACA | 5182 |
| gb:MT019531 | Organism:Severe | GTTTTACCTAATGATGACACTCTACGTGTTGAGGCTTTTGAGTACTACCACACA | 5182 |
| gb:MN996528 | Organism:Severe | GTTTTACCTAATGATGACACTCTACGTGTTGAGGCTTTTGAGTACTACCACACA | 5182 |
| gb:MN996530 | Organism:Severe | GTTTTACCTAATGATGACACTCTACGTGTTGAGGCTTTTGAGTACTACCACACA | 5168 |
| gb:MN908947 | Organism:Severe | GTTTTACCTAATGATGACACTCTACGTGTTGAGGCTTTTGAGTACTACCACACA | 5182 |
| gb:MT019532 | Organism:Severe | GTTTTACCTAATGATGACACTCTACGTGTTGAGGCTTTTGAGTACTACCACACA | 5182 |

\*\*\*\*\*

|             |                 |                                                             |      |
|-------------|-----------------|-------------------------------------------------------------|------|
| gb:MT020781 | Organism:Severe | CCTAGTTTCTGGGTAGGTACATGTCAGCATTAAATCACACTAAAAAGTGGAAATACCCA | 5230 |
| gb:MT007544 | Organism:Severe | CCTAGTTTCTGGGTAGGTACATGTCAGCATTAAATCACACTAAAAAGTGGAAATACCCA | 5242 |
| gb:MN994467 | Organism:Severe | CCTAGTTTCTGGGTAGGTACATGTCAGCATTAAATCACACTAAAAAGTGGAAATACCCA | 5242 |
| gb:MT044257 | Organism:Severe | CCTAGTTTCTGGGTAGGTACATGTCAGCATTAAATCACACTAAAAAGTGGAAATACCCA | 5242 |
| gb:MT106054 | Organism:Severe | CCTAGTTTCTGGGTAGGTACATGTCAGCATTAAATCACACTAAAAAGTGGAAATACCCA | 5242 |
| gb:MT049951 | Organism:Severe | CCTAGTTTCTGGGTAGGTACATGTCAGCATTAAATCACACTAAAAAGTGGAAATACCCA | 5242 |
| gb:MN975262 | Organism:Severe | CCTAGTTTCTGGGTAGGTACATGTCAGCATTAAATCACACTAAAAAGTGGAAATACCCA | 5242 |
| gb:MT106052 | Organism:Severe | CCTAGTTTCTGGGTAGGTACATGTCAGCATTAAATCACACTAAAAAGTGGAAATACCCA | 5242 |
| gb:LC522975 | Organism:Severe | CCTAGTTTCTGGGTAGGTACATGTCAGCATTAAATCACACTAAAAAGTGGAAATACCCA | 5239 |
| gb:LC522973 | Organism:Severe | CCTAGTTTCTGGGTAGGTACATGTCAGCATTAAATCACACTAAAAAGTGGAAATACCCA | 5239 |
| gb:LC522974 | Organism:Severe | CCTAGTTTCTGGGTAGGTACATGTCAGCATTAAATCACACTAAAAAGTGGAAATACCCA | 5239 |
| gb:MN985325 | Organism:Severe | CCTAGTTTCTGGGTAGGTACATGTCAGCATTAAATCACACTAAAAAGTGGAAATACCCA | 5242 |
| gb:MT020881 | Organism:Severe | CCTAGTTTCTGGGTAGGTACATGTCAGCATTAAATCACACTAAAAAGTGGAAATACCCA | 5242 |
| gb:MT020880 | Organism:Severe | CCTAGTTTCTGGGTAGGTACATGTCAGCATTAAATCACACTAAAAAGTGGAAATACCCA | 5242 |
| gb:MT066175 | Organism:Severe | CCTAGTTTCTGGGTAGGTACATGTCAGCATTAAATCACACTAAAAAGTGGAAATACCCA | 5242 |
| gb:MN997409 | Organism:Severe | CCTAGTTTCTGGGTAGGTACATGTCAGCATTAAATCACACTAAAAAGTGGAAATACCCA | 5242 |
| gb:MN938384 | Organism:Severe | CCTAGTTTCTGGGTAGGTACATGTCAGCATTAAATCACACTAAAAAGTGGAAATACCCA | 5210 |
| gb:MT044258 | Organism:Severe | CCTAGTTTCTGGGTAGGTACATGTCAGCATTAAATCACACTAAAAAGTGGAAATACCCA | 5218 |
| gb:MT039890 | Organism:Severe | CCTAGTTTCTGGGTAGGTACATGTCAGCATTAAATCACACTAAAAAGTGGAAATACCCA | 5242 |
| gb:MN988713 | Organism:Severe | CCTAGTTTCTGGGTAGGTACATGTCAGCATTAAATCACACTAAAAAGTGGAAATACCCA | 5242 |
| gb:LC521925 | Organism:Severe | CCTAGTTTCTGGGTAGGTACATGTCAGCATTAAATCACACTAAAAAGTGGAAATACCCA | 5215 |
| gb:MT093571 | Organism:Severe | CCTAGTTTCTGGGTAGGTACATGTCAGCATTAAATCACACTAAAAAGTGGAAATACCCA | 5242 |
| gb:MT039887 | Organism:Severe | CCTAGTTTCTGGGTAGGTACATGTCAGCATTAAATCACACTAAAAAGTGGAAATACCCA | 5242 |
| gb:MT019530 | Organism:Severe | CCTAGTTTCTGGGTAGGTACATGTCAGCATTAAATCACACTAAAAAGTGGAAATACCCA | 5242 |

|             |                 |                                                             |      |
|-------------|-----------------|-------------------------------------------------------------|------|
| gb:MT039888 | Organism:Severe | CCTAGTTTCTGGGTAGGTACATGTCAGCATTAAATCACACTAAAAAGTGGAAATACCCA | 5242 |
| gb:LC522972 | Organism:Severe | CCTAGTTTCTGGGTAGGTACATGTCAGCATTAAATCACACTAAAAAGTGGAAATACCCA | 5239 |
| gb:MT027063 | Organism:Severe | CCTAGTTTCTGGGTAGGTACATGTCAGCATTAAATCACACTAAAAAGTGGAAATACCCA | 5242 |
| gb:MT027062 | Organism:Severe | CCTAGTTTCTGGGTAGGTACATGTCAGCATTAAATCACACTAAAAAGTGGAAATACCCA | 5242 |
| gb:MT019529 | Organism:Severe | CCTAGTTTCTGGGTAGGTACATGTCAGCATTAAATCACACTAAAAAGTGGAAATACCCA | 5242 |
| gb:MN996529 | Organism:Severe | CCTAGTTTCTGGGTAGGTACATGTCAGCATTAAATCACACTAAAAAGTGGAAATACCCA | 5230 |
| gb:MN996531 | Organism:Severe | CCTAGTTTCTGGGTAGGTACATGTCAGCATTAAATCACACTAAAAAGTGGAAATACCCA | 5229 |
| gb:MT066176 | Organism:Severe | CCTAGTTTCTGGGTAGGTACATGTCAGCATTAAATCACACTAAAAAGTGGAAATACCCA | 5242 |
| gb:MT027064 | Organism:Severe | CCTAGTTTCTGGGTAGGTACATGTCAGCATTAAATCACACTAAAAAGTGGAAATACCCA | 5242 |
| gb:MN994468 | Organism:Severe | CCTAGTTTCTGGGTAGGTACATGTCAGCATTAAATCACACTAAAAAGTGGAAATACCCA | 5242 |
| gb:MT072688 | Organism:Severe | CCTAGTTTCTGGGTAGGTACATGTCAGCATTAAATCACACTAAAAAGTGGAAATACCCA | 5227 |
| gb:MN996527 | Organism:Severe | CCTAGTTTCTGGGTAGGTACATGTCAGCATTAAATCACACTAAAAAGTGGAAATACCCA | 5209 |
| gb:MT093631 | Organism:Severe | CCTAGTTTCTGGGTAGGTACATGTCAGCATTAAATCACACTAAAAAGTGGAAATACCCA | 5280 |
| gb:MT106053 | Organism:Severe | CCTAGTTTCTGGGTAGGTACATGTCAGCATTAAATCACACTAAAAAGTGGAAATACCCA | 5242 |
| gb:MT019533 | Organism:Severe | CCTAGTTTCTGGGTAGGTACATGTCAGCATTAAATCACACTAAAAAGTGGAAATACCCA | 5242 |
| gb:MT019531 | Organism:Severe | CCTAGTTTCTGGGTAGGTACATGTCAGCATTAAATCACACTAAAAAGTGGAAATACCCA | 5242 |
| gb:MN996528 | Organism:Severe | CCTAGTTTCTGGGTAGGTACATGTCAGCATTAAATCACACTAAAAAGTGGAAATACCCA | 5242 |
| gb:MN996530 | Organism:Severe | CCTAGTTTCTGGGTAGGTACATGTCAGCATTAAATCACACTAAAAAGTGGAAATACCCA | 5228 |
| gb:MN908947 | Organism:Severe | CCTAGTTTCTGGGTAGGTACATGTCAGCATTAAATCACACTAAAAAGTGGAAATACCCA | 5242 |
| gb:MT019532 | Organism:Severe | CCTAGTTTCTGGGTAGGTACATGTCAGCATTAAATCACACTAAAAAGTGGAAATACCCA | 5242 |

\*\*\*\*\*

|             |                 |                                                                |      |
|-------------|-----------------|----------------------------------------------------------------|------|
| gb:MT020781 | Organism:Severe | CAAGTTAATGGTTTAACTTCTATTTAAATGGGCAGATAACAACCTGTTATCTTGCCACTGCA | 5290 |
| gb:MT007544 | Organism:Severe | CAAGTTAATGGTTTAACTTCTATTTAAATGGGCAGATAACAACCTGTTATCTTGCCACTGCA | 5302 |
| gb:MN994467 | Organism:Severe | CAAGTTAATGGTTTAACTTCTATTTAAATGGGCAGATAACAACCTGTTATCTTGCCACTGCA | 5302 |
| gb:MT044257 | Organism:Severe | CAAGTTAATGGTTTAACTTCTATTTAAATGGGCAGATAACAACCTGTTATCTTGCCACTGCA | 5302 |
| gb:MT106054 | Organism:Severe | CAAGTTAATGGTTTAACTTCTATTTAAATGGGCAGATAACAACCTGTTATCTTGCCACTGCA | 5302 |
| gb:MT049951 | Organism:Severe | CAAGTTAATGGTTTAACTTCTATTTAAATGGGCAGATAACAACCTGTTATCTTGCCACTGCA | 5302 |
| gb:MN975262 | Organism:Severe | CAAGTTAATGGTTTAACTTCTATTTAAATGGGCAGATAACAACCTGTTATCTTGCCACTGCA | 5302 |
| gb:MT106052 | Organism:Severe | CAAGTTAATGGTTTAACTTCTATTTAAATGGGCAGATAACAACCTGTTATCTTGCCACTGCA | 5302 |
| gb:LC522975 | Organism:Severe | CAAGTTAATGGTTTAACTTCTATTTAAATGGGCAGATAACAACCTGTTATCTTGCCACTGCA | 5299 |
| gb:LC522973 | Organism:Severe | CAAGTTAATGGTTTAACTTCTATTTAAATGGGCAGATAACAACCTGTTATCTTGCCACTGCA | 5299 |
| gb:LC522974 | Organism:Severe | CAAGTTAATGGTTTAACTTCTATTTAAATGGGCAGATAACAACCTGTTATCTTGCCACTGCA | 5299 |
| gb:MN985325 | Organism:Severe | CAAGTTAATGGTTTAACTTCTATTTAAATGGGCAGATAACAACCTGTTATCTTGCCACTGCA | 5302 |
| gb:MT020881 | Organism:Severe | CAAGTTAATGGTTTAACTTCTATTTAAATGGGCAGATAACAACCTGTTATCTTGCCACTGCA | 5302 |
| gb:MT020880 | Organism:Severe | CAAGTTAATGGTTTAACTTCTATTTAAATGGGCAGATAACAACCTGTTATCTTGCCACTGCA | 5302 |
| gb:MT066175 | Organism:Severe | CAAGTTAATGGTTTAACTTCTATTTAAATGGGCAGATAACAACCTGTTATCTTGCCACTGCA | 5302 |
| gb:MN997409 | Organism:Severe | CAAGTTAATGGTTTAACTTCTATTTAAATGGGCAGATAACAACCTGTTATCTTGCCACTGCA | 5302 |
| gb:MN938384 | Organism:Severe | CAAGTTAATGGTTTAACTTCTATTTAAATGGGCAGATAACAACCTGTTATCTTGCCACTGCA | 5270 |
| gb:MT044258 | Organism:Severe | CAAGTTAATGGTTTAACTTCTATTTAAATGGGCAGATAACAACCTGTTATCTTGCCACTGCA | 5278 |
| gb:MT039890 | Organism:Severe | CAAGTTAATGGTTTAACTTCTATTTAAATGGGCAGATAACAACCTGTTATCTTGCCACTGCA | 5302 |
| gb:MN988713 | Organism:Severe | CAAGTTAATGGTTTAACTTCTATTTAAATGGGCAGATAACAACCTGTTATCTTGCCACTGCA | 5302 |
| gb:LC521925 | Organism:Severe | CAAGTTAATGGTTTAACTTCTATTTAAATGGGCAGATAACAACCTGTTATCTTGCCACTGCA | 5275 |
| gb:MT093571 | Organism:Severe | CAAGTTAATGGTTTAACTTCTATTTAAATGGGCAGATAACAACCTGTTATCTTGCCACTGCA | 5302 |
| gb:MT039887 | Organism:Severe | CAAGTTAATGGTTTAACTTCTATTTAAATGGGCAGATAACAACCTGTTATCTTGCCACTGCA | 5302 |
| gb:MT019530 | Organism:Severe | CAAGTTAATGGTTTAACTTCTATTTAAATGGGCAGATAACAACCTGTTATCTTGCCACTGCA | 5302 |
| gb:MT039888 | Organism:Severe | CAAGTTAATGGTTTAACTTCTATTTAAATGGGCAGATAACAACCTGTTATCTTGCCACTGCA | 5302 |
| gb:LC522972 | Organism:Severe | CAAGTTAATGGTTTAACTTCTATTTAAATGGGCAGATAACAACCTGTTATCTTGCCACTGCA | 5299 |
| gb:MT027063 | Organism:Severe | CAAGTTAATGGTTTAACTTCTATTTAAATGGGCAGATAACAACCTGTTATCTTGCCACTGCA | 5302 |
| gb:MT027062 | Organism:Severe | CAAGTTAATGGTTTAACTTCTATTTAAATGGGCAGATAACAACCTGTTATCTTGCCACTGCA | 5302 |
| gb:MT019529 | Organism:Severe | CAAGTTAATGGTTTAACTTCTATTTAAATGGGCAGATAACAACCTGTTATCTTGCCACTGCA | 5302 |
| gb:MN996529 | Organism:Severe | CAAGTTAATGGTTTAACTTCTATTTAAATGGGCAGATAACAACCTGTTATCTTGCCACTGCA | 5290 |
| gb:MN996531 | Organism:Severe | CAAGTTAATGGTTTAACTTCTATTTAAATGGGCAGATAACAACCTGTTATCTTGCCACTGCA | 5289 |
| gb:MT066176 | Organism:Severe | CAAGTTAATGGTTTAACTTCTATTTAAATGGGCAGATAACAACCTGTTATCTTGCCACTGCA | 5302 |
| gb:MT027064 | Organism:Severe | CAAGTTAATGGTTTAACTTCTATTTAAATGGGCAGATAACAACCTGTTATCTTGCCACTGCA | 5302 |
| gb:MN994468 | Organism:Severe | CAAGTTAATGGTTTAACTTCTATTTAAATGGGCAGATAACAACCTGTTATCTTGCCACTGCA | 5302 |
| gb:MT072688 | Organism:Severe | CAAGTTAATGGTTTAACTTCTATTTAAATGGGCAGATAACAACCTGTTATCTTGCCACTGCA | 5287 |
| gb:MN996527 | Organism:Severe | CAAGTTAATGGTTTAACTTCTATTTAAATGGGCAGATAACAACCTGTTATCTTGCCACTGCA | 5269 |
| gb:MT093631 | Organism:Severe | CAAGTTAATGGTTTAACTTCTATTTAAATGGGCAGATAACAACCTGTTATCTTGCCACTGCA | 5340 |
| gb:MT106053 | Organism:Severe | CAAGTTAATGGTTTAACTTCTATTTAAATGGGCAGATAACAACCTGTTATCTTGCCACTGCA | 5302 |
| gb:MT019533 | Organism:Severe | CAAGTTAATGGTTTAACTTCTATTTAAATGGGCAGATAACAACCTGTTATCTTGCCACTGCA | 5302 |
| gb:MT019531 | Organism:Severe | CAAGTTAATGGTTTAACTTCTATTTAAATGGGCAGATAACAACCTGTTATCTTGCCACTGCA | 5302 |
| gb:MN996528 | Organism:Severe | CAAGTTAATGGTTTAACTTCTATTTAAATGGGCAGATAACAACCTGTTATCTTGCCACTGCA | 5302 |
| gb:MN996530 | Organism:Severe | CAAGTTAATGGTTTAACTTCTATTTAAATGGGCAGATAACAACCTGTTATCTTGCCACTGCA | 5288 |
| gb:MN908947 | Organism:Severe | CAAGTTAATGGTTTAACTTCTATTTAAATGGGCAGATAACAACCTGTTATCTTGCCACTGCA | 5302 |



|             |                  |                                                                        |      |
|-------------|------------------|------------------------------------------------------------------------|------|
| gb:MT019532 | Organism: Severe | CAAGTTAATGGTTTAACTTCTATTAAATGGGCAGATAACAACCTGTTATCTTGCCACTGCA<br>***** | 5302 |
| gb:MT020781 | Organism: Severe | TTGTTAACTCCAACAAATAGAGTTGAAGTTAATCCACCTGCTCTACAAGATGCTTAT              | 5350 |
| gb:MT007544 | Organism: Severe | TTGTTAACTCCAACAAATAGAGTTGAAGTTAATCCACCTGCTCTACAAGATGCTTAT              | 5362 |
| gb:MN994467 | Organism: Severe | TTGTTAACTCCAACAAATAGAGTTGAAGTTAATCCACCTGCTCTACAAGATGCTTAT              | 5362 |
| gb:MT044257 | Organism: Severe | TTGTTAACTCCAACAAATAGAGTTGAAGTTAATCCACCTGCTCTACAAGATGCTTAT              | 5362 |
| gb:MT106054 | Organism: Severe | TTGTTAACTCCAACAAATAGAGTTGAAGTTAATCCACCTGCTCTACAAGATGCTTAT              | 5362 |
| gb:MT049951 | Organism: Severe | TTGTTAACTCCAACAAATAGAGTTGAAGTTAATCCACCTGCTCTACAAGATGCTTAT              | 5362 |
| gb:MN975262 | Organism: Severe | TTGTTAACTCCAACAAATAGAGTTGAAGTTAATCCACCTGCTCTACAAGATGCTTAT              | 5362 |
| gb:MT106052 | Organism: Severe | TTGTTAACTCCAACAAATAGAGTTGAAGTTAATCCACCTGCTCTACAAGATGCTTAT              | 5362 |
| gb:LC522975 | Organism: Severe | TTGTTAACTCCAACAAATAGAGTTGAAGTTAATCCACCTGCTCTACAAGATGCTTAT              | 5359 |
| gb:LC522973 | Organism: Severe | TTGTTAACTCCAACAAATAGAGTTGAAGTTAATCCACCTGCTCTACAAGATGCTTAT              | 5359 |
| gb:LC522974 | Organism: Severe | TTGTTAACTCCAACAAATAGAGTTGAAGTTAATCCACCTGCTCTACAAGATGCTTAT              | 5359 |
| gb:MN985325 | Organism: Severe | TTGTTAACTCCAACAAATAGAGTTGAAGTTAATCCACCTGCTCTACAAGATGCTTAT              | 5362 |
| gb:MT020881 | Organism: Severe | TTGTTAACTCCAACAAATAGAGTTGAAGTTAATCCACCTGCTCTACAAGATGCTTAT              | 5362 |
| gb:MT020880 | Organism: Severe | TTGTTAACTCCAACAAATAGAGTTGAAGTTAATCCACCTGCTCTACAAGATGCTTAT              | 5362 |
| gb:MT066175 | Organism: Severe | TTGTTAACTCCAACAAATAGAGTTGAAGTTAATCCACCTGCTCTACAAGATGCTTAT              | 5362 |
| gb:MN997409 | Organism: Severe | TTGTTAACTCCAACAAATAGAGTTGAAGTTAATCCACCTGCTCTACAAGATGCTTAT              | 5362 |
| gb:MN938384 | Organism: Severe | TTGTTAACTCCAACAAATAGAGTTGAAGTTAATCCACCTGCTCTACAAGATGCTTAT              | 5330 |
| gb:MT044258 | Organism: Severe | TTGTTAACTCCAACAAATAGAGTTGAAGTTAATCCACCTGCTCTACAAGATGCTTAT              | 5338 |
| gb:MT039890 | Organism: Severe | TTGTTAACTCCAACAAATAGAGTTGAAGTTAATCCACCTGCTCTACAAGATGCTTAT              | 5362 |
| gb:MN988713 | Organism: Severe | TTGTTAACTCCAACAAATAGAGTTGAAGTTAATCCACCTGCTCTACAAGATGCTTAT              | 5362 |
| gb:LC521925 | Organism: Severe | TTGTTAACTCCAACAAATAGAGTTGAAGTTAATCCACCTGCTCTACAAGATGCTTAT              | 5335 |
| gb:MT093571 | Organism: Severe | TTGTTAACTCCAACAAATAGAGTTGAAGTTAATCCACCTGCTCTACAAGATGCTTAT              | 5362 |
| gb:MT039887 | Organism: Severe | TTGTTAACTCCAACAAATAGAGTTGAAGTTAATCCACCTGCTCTACAAGATGCTTAT              | 5362 |
| gb:MT019530 | Organism: Severe | TTGTTAACTCCAACAAATAGAGTTGAAGTTAATCCACCTGCTCTACAAGATGCTTAT              | 5362 |
| gb:MT039888 | Organism: Severe | TTGTTAACTCCAACAAATAGAGTTGAAGTTAATCCACCTGCTCTACAAGATGCTTAT              | 5362 |
| gb:LC522972 | Organism: Severe | TTGTTAACTCCAACAAATAGAGTTGAAGTTAATCCACCTGCTCTACAAGATGCTTAT              | 5359 |
| gb:MT027063 | Organism: Severe | TTGTTAACTCCAACAAATAGAGTTGAAGTTAATCCACCTGCTCTACAAGATGCTTAT              | 5362 |
| gb:MT027062 | Organism: Severe | TTGTTAACTCCAACAAATAGAGTTGAAGTTAATCCACCTGCTCTACAAGATGCTTAT              | 5362 |
| gb:MT019529 | Organism: Severe | TTGTTAACTCCAACAAATAGAGTTGAAGTTAATCCACCTGCTCTACAAGATGCTTAT              | 5362 |
| gb:MN996529 | Organism: Severe | TTGTTAACTCCAACAAATAGAGTTGAAGTTAATCCACCTGCTCTACAAGATGCTTAT              | 5350 |
| gb:MN996531 | Organism: Severe | TTGTTAACTCCAACAAATAGAGTTGAAGTTAATCCACCTGCTCTACAAGATGCTTAT              | 5349 |
| gb:MT066176 | Organism: Severe | TTGTTAACTCCAACAAATAGAGTTGAAGTTAATCCACCTGCTCTACAAGATGCTTAT              | 5362 |
| gb:MT027064 | Organism: Severe | TTGTTAACTCCAACAAATAGAGTTGAAGTTAATCCACCTGCTCTACAAGATGCTTAT              | 5362 |
| gb:MN994468 | Organism: Severe | TTGTTAACTCCAACAAATAGAGTTGAAGTTAATCCACCTGCTCTACAAGATGCTTAT              | 5362 |
| gb:MT072688 | Organism: Severe | TTGTTAACTCCAACAAATAGAGTTGAAGTTAATCCACCTGCTCTACAAGATGCTTAT              | 5347 |
| gb:MN996527 | Organism: Severe | TTGTTAACTCCAACAAATAGAGTTGAAGTTAATCCACCTGCTCTACAAGATGCTTAT              | 5329 |
| gb:MT093631 | Organism: Severe | TTGTTAACTCCAACAAATAGAGTTGAAGTTAATCCACCTGCTCTACAAGATGCTTAT              | 5400 |
| gb:MT106053 | Organism: Severe | TTGTTAACTCCAACAAATAGAGTTGAAGTTAATCCACCTGCTCTACAAGATGCTTAT              | 5362 |
| gb:MT019533 | Organism: Severe | TTGTTAACTCCAACAAATAGAGTTGAAGTTAATCCACCTGCTCTACAAGATGCTTAT              | 5362 |
| gb:MT019531 | Organism: Severe | TTGTTAACTCCAACAAATAGAGTTGAAGTTAATCCACCTGCTCTACAAGATGCTTAT              | 5362 |
| gb:MN996528 | Organism: Severe | TTGTTAACTCCAACAAATAGAGTTGAAGTTAATCCACCTGCTCTACAAGATGCTTAT              | 5362 |
| gb:MN996530 | Organism: Severe | TTGTTAACTCCAACAAATAGAGTTGAAGTTAATCCACCTGCTCTACAAGATGCTTAT              | 5348 |
| gb:MN908947 | Organism: Severe | TTGTTAACTCCAACAAATAGAGTTGAAGTTAATCCACCTGCTCTACAAGATGCTTAT              | 5362 |
| gb:MT019532 | Organism: Severe | TTGTTAACTCCAACAAATAGAGTTGAAGTTAATCCACCTGCTCTACAAGATGCTTAT<br>*****     | 5362 |

|             |                  |                                                             |      |
|-------------|------------------|-------------------------------------------------------------|------|
| gb:MT020781 | Organism: Severe | TACAGAGCAAGGGCTGGTGAAGCTGCTAACTTTTGTGCATTATCTTAGCCTACTGTAAT | 5410 |
| gb:MT007544 | Organism: Severe | TACAGAGCAAGGGCTGGTGAAGCTGCTAACTTTTGTGCATTATCTTAGCCTACTGTAAT | 5422 |
| gb:MN994467 | Organism: Severe | TACAGAGCAAGGGCTGGTGAAGCTGCTAACTTTTGTGCATTATCTTAGCCTACTGTAAT | 5422 |
| gb:MT044257 | Organism: Severe | TACAGAGCAAGGGCTGGTGAAGCTGCTAACTTTTGTGCATTATCTTAGCCTACTGTAAT | 5422 |
| gb:MT106054 | Organism: Severe | TACAGAGCAAGGGCTGGTGAAGCTGCTAACTTTTGTGCATTATCTTAGCCTACTGTAAT | 5422 |
| gb:MT049951 | Organism: Severe | TACAGAGCAAGGGCTGGTGAAGCTGCTAACTTTTGTGCATTATCTTAGCCTACTGTAAT | 5422 |
| gb:MN975262 | Organism: Severe | TACAGAGCAAGGGCTGGTGAAGCTGCTAACTTTTGTGCATTATCTTAGCCTACTGTAAT | 5422 |
| gb:MT106052 | Organism: Severe | TACAGAGCAAGGGCTGGTGAAGCTGCTAACTTTTGTGCATTATCTTAGCCTACTGTAAT | 5422 |
| gb:LC522975 | Organism: Severe | TACAGAGCAAGGGCTGGTGAAGCTGCTAACTTTTGTGCATTATCTTAGCCTACTGTAAT | 5419 |
| gb:LC522973 | Organism: Severe | TACAGAGCAAGGGCTGGTGAAGCTGCTAACTTTTGTGCATTATCTTAGCCTACTGTAAT | 5419 |
| gb:LC522974 | Organism: Severe | TACAGAGCAAGGGCTGGTGAAGCTGCTAACTTTTGTGCATTATCTTAGCCTACTGTAAT | 5419 |
| gb:MN985325 | Organism: Severe | TACAGAGCAAGGGCTGGTGAAGCTGCTAACTTTTGTGCATTATCTTAGCCTACTGTAAT | 5422 |
| gb:MT020881 | Organism: Severe | TACAGAGCAAGGGCTGGTGAAGCTGCTAACTTTTGTGCATTATCTTAGCCTACTGTAAT | 5422 |
| gb:MT020880 | Organism: Severe | TACAGAGCAAGGGCTGGTGAAGCTGCTAACTTTTGTGCATTATCTTAGCCTACTGTAAT | 5422 |
| gb:MT066175 | Organism: Severe | TACAGAGCAAGGGCTGGTGAAGCTGCTAACTTTTGTGCATTATCTTAGCCTACTGTAAT | 5422 |
| gb:MN997409 | Organism: Severe | TACAGAGCAAGGGCTGGTGAAGCTGCTAACTTTTGTGCATTATCTTAGCCTACTGTAAT | 5422 |

|             |                 |                                                             |      |
|-------------|-----------------|-------------------------------------------------------------|------|
| gb:MN938384 | Organism:Severe | TACAGAGCAAGGGCTGGTGAAGCTGCTAACTTTTGTGCATTATCTTAGCCTACTGTAAT | 5390 |
| gb:MT044258 | Organism:Severe | TACAGAGCAAGGGCTGGTGAAGCTGCTAACTTTTGTGCATTATCTTAGCCTACTGTAAT | 5398 |
| gb:MT039890 | Organism:Severe | TACAGAGCAAGGGCTGGTGAAGCTGCTAACTTTTGTGCATTATCTTAGCCTACTGTAAT | 5422 |
| gb:MN988713 | Organism:Severe | TACAGAGCAAGGGCTGGTGAAGCTGCTAACTTTTGTGCATTATCTTAGCCTACTGTAAT | 5422 |
| gb:LC521925 | Organism:Severe | TACAGAGCAAGGGCTGGTGAAGCTGCTAACTTTTGTGCATTATCTTAGCCTACTGTAAT | 5395 |
| gb:MT093571 | Organism:Severe | TACAGAGCAAGGGCTGGTGAAGCTGCTAACTTTTGTGCATTATCTTAGCCTACTGTAAT | 5422 |
| gb:MT039887 | Organism:Severe | TACAGAGCAAGGGCTGGTGAAGCTGCTAACTTTTGTGCATTATCTTAGCCTACTGTAAT | 5422 |
| gb:MT019530 | Organism:Severe | TACAGAGCAAGGGCTGGTGAAGCTGCTAACTTTTGTGCATTATCTTAGCCTACTGTAAT | 5422 |
| gb:MT039888 | Organism:Severe | TACAGAGCAAGGGCTGGTGAAGCTGCTAACTTTTGTGCATTATCTTAGCCTACTGTAAT | 5422 |
| gb:LC522972 | Organism:Severe | TACAGAGCAAGGGCTGGTGAAGCTGCTAACTTTTGTGCATTATCTTAGCCTACTGTAAT | 5419 |
| gb:MT027063 | Organism:Severe | TACAGAGCAAGGGCTGGTGAAGCTGCTAACTTTTGTGCATTATCTTAGCCTACTGTAAT | 5422 |
| gb:MT027062 | Organism:Severe | TACAGAGCAAGGGCTGGTGAAGCTGCTAACTTTTGTGCATTATCTTAGCCTACTGTAAT | 5422 |
| gb:MT019529 | Organism:Severe | TACAGAGCAAGGGCTGGTGAAGCTGCTAACTTTTGTGCATTATCTTAGCCTACTGTAAT | 5422 |
| gb:MN996529 | Organism:Severe | TACAGAGCAAGGGCTGGTGAAGCTGCTAACTTTTGTGCATTATCTTAGCCTACTGTAAT | 5410 |
| gb:MN996531 | Organism:Severe | TACAGAGCAAGGGCTGGTGAAGCTGCTAACTTTTGTGCATTATCTTAGCCTACTGTAAT | 5409 |
| gb:MT066176 | Organism:Severe | TACAGAGCAAGGGCTGGTGAAGCTGCTAACTTTTGTGCATTATCTTAGCCTACTGTAAT | 5422 |
| gb:MT027064 | Organism:Severe | TACAGAGCAAGGGCTGGTGAAGCTGCTAACTTTTGTGCATTATCTTAGCCTACTGTAAT | 5422 |
| gb:MN994468 | Organism:Severe | TACAGAGCAAGGGCTGGTGAAGCTGCTAACTTTTGTGCATTATCTTAGCCTACTGTAAT | 5422 |
| gb:MT072688 | Organism:Severe | TACAGAGCAAGGGCTGGTGAAGCTGCTAACTTTTGTGCATTATCTTAGCCTACTGTAAT | 5407 |
| gb:MN996527 | Organism:Severe | TACAGAGCAAGGGCTGGTGAAGCTGCTAACTTTTGTGCATTATCTTAGCCTACTGTAAT | 5389 |
| gb:MT093631 | Organism:Severe | TACAGAGCAAGGGCTGGTGAAGCTGCTAACTTTTGTGCATTATCTTAGCCTACTGTAAT | 5460 |
| gb:MT106053 | Organism:Severe | TACAGAGCAAGGGCTGGTGAAGCTGCTAACTTTTGTGCATTATCTTAGCCTACTGTAAT | 5422 |
| gb:MT019533 | Organism:Severe | TACAGAGCAAGGGCTGGTGAAGCTGCTAACTTTTGTGCATTATCTTAGCCTACTGTAAT | 5422 |
| gb:MT019531 | Organism:Severe | TACAGAGCAAGGGCTGGTGAAGCTGCTAACTTTTGTGCATTATCTTAGCCTACTGTAAT | 5422 |
| gb:MN996528 | Organism:Severe | TACAGAGCAAGGGCTGGTGAAGCTGCTAACTTTTGTGCATTATCTTAGCCTACTGTAAT | 5422 |
| gb:MN996530 | Organism:Severe | TACAGAGCAAGGGCTGGTGAAGCTGCTAACTTTTGTGCATTATCTTAGCCTACTGTAAT | 5408 |
| gb:MN908947 | Organism:Severe | TACAGAGCAAGGGCTGGTGAAGCTGCTAACTTTTGTGCATTATCTTAGCCTACTGTAAT | 5422 |
| gb:MT019532 | Organism:Severe | TACAGAGCAAGGGCTGGTGAAGCTGCTAACTTTTGTGCATTATCTTAGCCTACTGTAAT | 5422 |

\*\*\*\*\*

|             |                 |                                                            |      |
|-------------|-----------------|------------------------------------------------------------|------|
| gb:MT020781 | Organism:Severe | AAGACAGTAGGTGAGTTAGGTGATGTTAGAGAAACAATGAGTTACTTGTTCACATGCC | 5470 |
| gb:MT007544 | Organism:Severe | AAGACAGTAGGTGAGTTAGGTGATGTTAGAGAAACAATGAGTTACTTGTTCACATGCC | 5482 |
| gb:MN994467 | Organism:Severe | AAGACAGTAGGTGAGTTAGGTGATGTTAGAGAAACAATGAGTTACTTGTTCACATGCC | 5482 |
| gb:MT044257 | Organism:Severe | AAGACAGTAGGTGAGTTAGGTGATGTTAGAGAAACAATGAGTTACTTGTTCACATGCC | 5482 |
| gb:MT106054 | Organism:Severe | AAGACAGTAGGTGAGTTAGGTGATGTTAGAGAAACAATGAGTTACTTGTTCACATGCC | 5482 |
| gb:MT049951 | Organism:Severe | AAGACAGTAGGTGAGTTAGGTGATGTTAGAGAAACAATGAGTTACTTGTTCACATGCC | 5482 |
| gb:MN975262 | Organism:Severe | AAGACAGTAGGTGAGTTAGGTGATGTTAGAGAAACAATGAGTTACTTGTTCACATGCC | 5482 |
| gb:MT106052 | Organism:Severe | AAGACAGTAGGTGAGTTAGGTGATGTTAGAGAAACAATGAGTTACTTGTTCACATGCC | 5482 |
| gb:LC522975 | Organism:Severe | AAGACAGTAGGTGAGTTAGGTGATGTTAGAGAAACAATGAGTTACTTGTTCACATGCC | 5479 |
| gb:LC522973 | Organism:Severe | AAGACAGTAGGTGAGTTAGGTGATGTTAGAGAAACAATGAGTTACTTGTTCACATGCC | 5479 |
| gb:LC522974 | Organism:Severe | AAGACAGTAGGTGAGTTAGGTGATGTTAGAGAAACAATGAGTTACTTGTTCACATGCC | 5479 |
| gb:MN985325 | Organism:Severe | AAGACAGTAGGTGAGTTAGGTGATGTTAGAGAAACAATGAGTTACTTGTTCACATGCC | 5482 |
| gb:MT020881 | Organism:Severe | AAGACAGTAGGTGAGTTAGGTGATGTTAGAGAAACAATGAGTTACTTGTTCACATGCC | 5482 |
| gb:MT020880 | Organism:Severe | AAGACAGTAGGTGAGTTAGGTGATGTTAGAGAAACAATGAGTTACTTGTTCACATGCC | 5482 |
| gb:MT066175 | Organism:Severe | AAGACAGTAGGTGAGTTAGGTGATGTTAGAGAAACAATGAGTTACTTGTTCACATGCC | 5482 |
| gb:MN997409 | Organism:Severe | AAGACAGTAGGTGAGTTAGGTGATGTTAGAGAAACAATGAGTTACTTGTTCACATGCC | 5482 |
| gb:MN938384 | Organism:Severe | AAGACAGTAGGTGAGTTAGGTGATGTTAGAGAAACAATGAGTTACTTGTTCACATGCC | 5450 |
| gb:MT044258 | Organism:Severe | AAGACAGTAGGTGAGTTAGGTGATGTTAGAGAAACAATGAGTTACTTGTTCACATGCC | 5458 |
| gb:MT039890 | Organism:Severe | AAGACAGTAGGTGAGTTAGGTGATGTTAGAGAAACAATGAGTTACTTGTTCACATGCC | 5482 |
| gb:MN988713 | Organism:Severe | AAGACAGTAGGTGAGTTAGGTGATGTTAGAGAAACAATGAGTTACTTGTTCACATGCC | 5482 |
| gb:LC521925 | Organism:Severe | AAGACAGTAGGTGAGTTAGGTGATGTTAGAGAAACAATGAGTTACTTGTTCACATGCC | 5455 |
| gb:MT093571 | Organism:Severe | AAGACAGTAGGTGAGTTAGGTGATGTTAGAGAAACAATGAGTTACTTGTTCACATGCC | 5482 |
| gb:MT039887 | Organism:Severe | AAGACAGTAGGTGAGTTAGGTGATGTTAGAGAAACAATGAGTTACTTGTTCACATGCC | 5482 |
| gb:MT019530 | Organism:Severe | AAGACAGTAGGTGAGTTAGGTGATGTTAGAGAAACAATGAGTTACTTGTTCACATGCC | 5482 |
| gb:MT039888 | Organism:Severe | AAGACAGTAGGTGAGTTAGGTGATGTTAGAGAAACAATGAGTTACTTGTTCACATGCC | 5482 |
| gb:LC522972 | Organism:Severe | AAGACAGTAGGTGAGTTAGGTGATGTTAGAGAAACAATGAGTTACTTGTTCACATGCC | 5479 |
| gb:MT027063 | Organism:Severe | AAGACAGTAGGTGAGTTAGGTGATGTTAGAGAAACAATGAGTTACTTGTTCACATGCC | 5482 |
| gb:MT027062 | Organism:Severe | AAGACAGTAGGTGAGTTAGGTGATGTTAGAGAAACAATGAGTTACTTGTTCACATGCC | 5482 |
| gb:MT019529 | Organism:Severe | AAGACAGTAGGTGAGTTAGGTGATGTTAGAGAAACAATGAGTTACTTGTTCACATGCC | 5482 |
| gb:MN996529 | Organism:Severe | AAGACAGTAGGTGAGTTAGGTGATGTTAGAGAAACAATGAGTTACTTGTTCACATGCC | 5470 |
| gb:MN996531 | Organism:Severe | AAGACAGTAGGTGAGTTAGGTGATGTTAGAGAAACAATGAGTTACTTGTTCACATGCC | 5469 |
| gb:MT066176 | Organism:Severe | AAGACAGTAGGTGAGTTAGGTGATGTTAGAGAAACAATGAGTTACTTGTTCACATGCC | 5482 |
| gb:MT027064 | Organism:Severe | AAGACAGTAGGTGAGTTAGGTGATGTTAGAGAAACAATGAGTTACTTGTTCACATGCC | 5482 |
| gb:MN994468 | Organism:Severe | AAGACAGTAGGTGAGTTAGGTGATGTTAGAGAAACAATGAGTTACTTGTTCACATGCC | 5482 |
| gb:MT072688 | Organism:Severe | AAGACAGTAGGTGAGTTAGGTGATGTTAGAGAAACAATGAGTTACTTGTTCACATGCC | 5467 |

|             |                 |                                                            |      |
|-------------|-----------------|------------------------------------------------------------|------|
| gb:MN996527 | Organism:Severe | AAGACAGTAGGTGAGTTAGGTGATGTTAGAGAAACAATGAGTTACTTGTTCACATGCC | 5449 |
| gb:MT093631 | Organism:Severe | AAGACAGTAGGTGAGTTAGGTGATGTTAGAGAAACAATGAGTTACTTGTTCACATGCC | 5520 |
| gb:MT106053 | Organism:Severe | AAGACAGTAGGTGAGTTAGGTGATGTTAGAGAAACAATGAGTTACTTGTTCACATGCC | 5482 |
| gb:MT019533 | Organism:Severe | AAGACAGTAGGTGAGTTAGGTGATGTTAGAGAAACAATGAGTTACTTGTTCACATGCC | 5482 |
| gb:MT019531 | Organism:Severe | AAGACAGTAGGTGAGTTAGGTGATGTTAGAGAAACAATGAGTTACTTGTTCACATGCC | 5482 |
| gb:MN996528 | Organism:Severe | AAGACAGTAGGTGAGTTAGGTGATGTTAGAGAAACAATGAGTTACTTGTTCACATGCC | 5482 |
| gb:MN996530 | Organism:Severe | AAGACAGTAGGTGAGTTAGGTGATGTTAGAGAAACAATGAGTTACTTGTTCACATGCC | 5468 |
| gb:MN908947 | Organism:Severe | AAGACAGTAGGTGAGTTAGGTGATGTTAGAGAAACAATGAGTTACTTGTTCACATGCC | 5482 |
| gb:MT019532 | Organism:Severe | AAGACAGTAGGTGAGTTAGGTGATGTTAGAGAAACAATGAGTTACTTGTTCACATGCC | 5482 |

\*\*\*\*\* \*\*

|             |                 |                                                                |      |
|-------------|-----------------|----------------------------------------------------------------|------|
| gb:MT020781 | Organism:Severe | AATTTAGATTCTTGCAAAAGAGTCTTGAACGTGGTGTGTA AAAACTTGTGGACAACAGCAG | 5530 |
| gb:MT007544 | Organism:Severe | AATTTAGATTCTTGCAAAAGAGTCTTGAACGTGGTGTGTA AAAACTTGTGGACAACAGCAG | 5542 |
| gb:MN994467 | Organism:Severe | AATTTAGATTCTTGCAAAAGAGTCTTGAACGTGGTGTGTA AAAACTTGTGGACAACAGCAG | 5542 |
| gb:MT044257 | Organism:Severe | AATTTAGATTCTTGCAAAAGAGTCTTGAACGTGGTGTGTA AAAACTTGTGGACAACAGCAG | 5542 |
| gb:MT106054 | Organism:Severe | AATTTAGATTCTTGCAAAAGAGTCTTGAACGTGGTGTGTA AAAACTTGTGGACAACAGCAG | 5542 |
| gb:MT049951 | Organism:Severe | AATTTAGATTCTTGCAAAAGAGTCTTGAACGTGGTGTGTA AAAACTTGTGGACAACAGCAG | 5542 |
| gb:MN975262 | Organism:Severe | AATTTAGATTCTTGCAAAAGAGTCTTGAACGTGGTGTGTA AAAACTTGTGGACAACAGCAG | 5542 |
| gb:MT106052 | Organism:Severe | AATTTAGATTCTTGCAAAAGAGTCTTGAACGTGGTGTGTA AAAACTTGTGGACAACAGCAG | 5542 |
| gb:LC522975 | Organism:Severe | AATTTAGATTCTTGCAAAAGAGTCTTGAACGTGGTGTGTA AAAACTTGTGGACAACAGCAG | 5539 |
| gb:LC522973 | Organism:Severe | AATTTAGATTCTTGCAAAAGAGTCTTGAACGTGGTGTGTA AAAACTTGTGGACAACAGCAG | 5539 |
| gb:LC522974 | Organism:Severe | AATTTAGATTCTTGCAAAAGAGTCTTGAACGTGGTGTGTA AAAACTTGTGGACAACAGCAG | 5539 |
| gb:MN985325 | Organism:Severe | AATTTAGATTCTTGCAAAAGAGTCTTGAACGTGGTGTGTA AAAACTTGTGGACAACAGCAG | 5542 |
| gb:MT020881 | Organism:Severe | AATTTAGATTCTTGCAAAAGAGTCTTGAACGTGGTGTGTA AAAACTTGTGGACAACAGCAG | 5542 |
| gb:MT020880 | Organism:Severe | AATTTAGATTCTTGCAAAAGAGTCTTGAACGTGGTGTGTA AAAACTTGTGGACAACAGCAG | 5542 |
| gb:MT066175 | Organism:Severe | AATTTAGATTCTTGCAAAAGAGTCTTGAACGTGGTGTGTA AAAACTTGTGGACAACAGCAG | 5542 |
| gb:MN997409 | Organism:Severe | AATTTAGATTCTTGCAAAAGAGTCTTGAACGTGGTGTGTA AAAACTTGTGGACAACAGCAG | 5542 |
| gb:MN938384 | Organism:Severe | AATTTAGATTCTTGCAAAAGAGTCTTGAACGTGGTGTGTA AAAACTTGTGGACAACAGCAG | 5510 |
| gb:MT044258 | Organism:Severe | AATTTAGATTCTTGCAAAAGAGTCTTGAACGTGGTGTGTA AAAACTTGTGGACAACAGCAG | 5518 |
| gb:MT039890 | Organism:Severe | AATTTAGATTCTTGCAAAAGAGTCTTGAACGTGGTGTGTA AAAACTTGTGGACAACAGCAG | 5542 |
| gb:MN988713 | Organism:Severe | AATTTAGATTCTTGCAAAAGAGTCTTGAACGTGGTGTGTA AAAACTTGTGGACAACAGCAG | 5542 |
| gb:LC521925 | Organism:Severe | AATTTAGATTCTTGCAAAAGAGTCTTGAACGTGGTGTGTA AAAACTTGTGGACAACAGCAG | 5515 |
| gb:MT093571 | Organism:Severe | AATTTAGATTCTTGCAAAAGAGTCTTGAACGTGGTGTGTA AAAACTTGTGGACAACAGCAG | 5542 |
| gb:MT039887 | Organism:Severe | AATTTAGATTCTTGCAAAAGAGTCTTGAACGTGGTGTGTA AAAACTTGTGGACAACAGCAG | 5542 |
| gb:MT019530 | Organism:Severe | AATTTAGATTCTTGCAAAAGAGTCTTGAACGTGGTGTGTA AAAACTTGTGGACAACAGCAG | 5542 |
| gb:MT039888 | Organism:Severe | AATTTAGATTCTTGCAAAAGAGTCTTGAACGTGGTGTGTA AAAACTTGTGGACAACAGCAG | 5542 |
| gb:LC522972 | Organism:Severe | AATTTAGATTCTTGCAAAAGAGTCTTGAACGTGGTGTGTA AAAACTTGTGGACAACAGCAG | 5539 |
| gb:MT027063 | Organism:Severe | AATTTAGATTCTTGCAAAAGAGTCTTGAACGTGGTGTGTA AAAACTTGTGGACAACAGCAG | 5542 |
| gb:MT027062 | Organism:Severe | AATTTAGATTCTTGCAAAAGAGTCTTGAACGTGGTGTGTA AAAACTTGTGGACAACAGCAG | 5542 |
| gb:MT019529 | Organism:Severe | AATTTAGATTCTTGCAAAAGAGTCTTGAACGTGGTGTGTA AAAACTTGTGGACAACAGCAG | 5542 |
| gb:MN996529 | Organism:Severe | AATTTAGATTCTTGCAAAAGAGTCTTGAACGTGGTGTGTA AAAACTTGTGGACAACAGCAG | 5530 |
| gb:MN996531 | Organism:Severe | AATTTAGATTCTTGCAAAAGAGTCTTGAACGTGGTGTGTA AAAACTTGTGGACAACAGCAG | 5529 |
| gb:MT066176 | Organism:Severe | AATTTAGATTCTTGCAAAAGAGTCTTGAACGTGGTGTGTA AAAACTTGTGGACAACAGCAG | 5542 |
| gb:MT027064 | Organism:Severe | AATTTAGATTCTTGCAAAAGAGTCTTGAACGTGGTGTGTA AAAACTTGTGGACAACAGCAG | 5542 |
| gb:MN994468 | Organism:Severe | AATTTAGATTCTTGCAAAAGAGTCTTGAACGTGGTGTGTA AAAACTTGTGGACAACAGCAG | 5542 |
| gb:MT072688 | Organism:Severe | AATTTAGATTCTTGCAAAAGAGTCTTGAACGTGGTGTGTA AAAACTTGTGGACAACAGCAG | 5527 |
| gb:MN996527 | Organism:Severe | AATTTAGATTCTTGCAAAAGAGTCTTGAACGTGGTGTGTA AAAACTTGTGGACAACAGCAG | 5509 |
| gb:MT093631 | Organism:Severe | AATTTAGATTCTTGCAAAAGAGTCTTGAACGTGGTGTGTA AAAACTTGTGGACAACAGCAG | 5580 |
| gb:MT106053 | Organism:Severe | AATTTAGATTCTTGCAAAAGAGTCTTGAACGTGGTGTGTA AAAACTTGTGGACAACAGCAG | 5542 |
| gb:MT019533 | Organism:Severe | AATTTAGATTCTTGCAAAAGAGTCTTGAACGTGGTGTGTA AAAACTTGTGGACAACAGCAG | 5542 |
| gb:MT019531 | Organism:Severe | AATTTAGATTCTTGCAAAAGAGTCTTGAACGTGGTGTGTA AAAACTTGTGGACAACAGCAG | 5542 |
| gb:MN996528 | Organism:Severe | AATTTAGATTCTTGCAAAAGAGTCTTGAACGTGGTGTGTA AAAACTTGTGGACAACAGCAG | 5542 |
| gb:MN996530 | Organism:Severe | AATTTAGATTCTTGCAAAAGAGTCTTGAACGTGGTGTGTA AAAACTTGTGGACAACAGCAG | 5528 |
| gb:MN908947 | Organism:Severe | AATTTAGATTCTTGCAAAAGAGTCTTGAACGTGGTGTGTA AAAACTTGTGGACAACAGCAG | 5542 |
| gb:MT019532 | Organism:Severe | AATTTAGATTCTTGCAAAAGAGTCTTGAACGTGGTGTGTA AAAACTTGTGGACAACAGCAG | 5542 |

\*\*\*\*\*

|             |                 |                                                             |      |
|-------------|-----------------|-------------------------------------------------------------|------|
| gb:MT020781 | Organism:Severe | ACAACCCTTAAGGGTGTAGAAGCTGTTATGTACATGGGCACACTTCTTATGAACAATTT | 5590 |
| gb:MT007544 | Organism:Severe | ACAACCCTTAAGGGTGTAGAAGCTGTTATGTACATGGGCACACTTCTTATGAACAATTT | 5602 |
| gb:MN994467 | Organism:Severe | ACAACCCTTAAGGGTGTAGAAGCTGTTATGTACATGGGCACACTTCTTATGAACAATTT | 5602 |
| gb:MT044257 | Organism:Severe | ACAACCCTTAAGGGTGTAGAAGCTGTTATGTACATGGGCACACTTCTTATGAACAATTT | 5602 |
| gb:MT106054 | Organism:Severe | ACAACCCTTAAGGGTGTAGAAGCTGTTATGTACATGGGCACACTTCTTATGAACAATTT | 5602 |
| gb:MT049951 | Organism:Severe | ACAACCCTTAAGGGTGTAGAAGCTGTTATGTACATGGGCACACTTCTTATGAACAATTT | 5602 |
| gb:MN975262 | Organism:Severe | ACAACCCTTAAGGGTGTAGAAGCTGTTATGTACATGGGCACACTTCTTATGAACAATTT | 5602 |
| gb:MT106052 | Organism:Severe | ACAACCCTTAAGGGTGTAGAAGCTGTTATGTACATGGGCACACTTCTTATGAACAATTT | 5602 |

|             |                 |                                                              |      |
|-------------|-----------------|--------------------------------------------------------------|------|
| gb:LC522975 | Organism:Severe | ACAACCCTTAAGGGTGTAGAAGCTGTTATGTACATGGGCACACTTTCTTATGAACAATTT | 5599 |
| gb:LC522973 | Organism:Severe | ACAACCCTTAAGGGTGTAGAAGCTGTTATGTACATGGGCACACTTTCTTATGAACAATTT | 5599 |
| gb:LC522974 | Organism:Severe | ACAACCCTTAAGGGTGTAGAAGCTGTTATGTACATGGGCACACTTTCTTATGAACAATTT | 5599 |
| gb:MN985325 | Organism:Severe | ACAACCCTTAAGGGTGTAGAAGCTGTTATGTACATGGGCACACTTTCTTATGAACAATTT | 5602 |
| gb:MT020881 | Organism:Severe | ACAACCCTTAAGGGTGTAGAAGCTGTTATGTACATGGGCACACTTTCTTATGAACAATTT | 5602 |
| gb:MT020880 | Organism:Severe | ACAACCCTTAAGGGTGTAGAAGCTGTTATGTACATGGGCACACTTTCTTATGAACAATTT | 5602 |
| gb:MT066175 | Organism:Severe | ACAACCCTTAAGGGTGTAGAAGCTGTTATGTACATGGGCACACTTTCTTATGAACAATTT | 5602 |
| gb:MN997409 | Organism:Severe | ACAACCCTTAAGGGTGTAGAAGCTGTTATGTACATGGGCACACTTTCTTATGAACAATTT | 5602 |
| gb:MN938384 | Organism:Severe | ACAACCCTTAAGGGTGTAGAAGCTGTTATGTACATGGGCACACTTTCTTATGAACAATTT | 5570 |
| gb:MT044258 | Organism:Severe | ACAACCCTTAAGGGTGTAGAAGCTGTTATGTACATGGGCACACTTTCTTATGAACAATTT | 5578 |
| gb:MT039890 | Organism:Severe | ACAACCCTTAAGGGTGTAGAAGCTGTTATGTACATGGGCACACTTTCTTATGAACAATTT | 5602 |
| gb:MN988713 | Organism:Severe | ACAACCCTTAAGGGTGTAGAAGCTGTTATGTACATGGGCACACTTTCTTATGAACAATTT | 5602 |
| gb:LC521925 | Organism:Severe | ACAACCCTTAAGGGTGTAGAAGCTGTTATGTACATGGGCACACTTTCTTATGAACAATTT | 5575 |
| gb:MT093571 | Organism:Severe | ACAACCCTTAAGGGTGTAGAAGCTGTTATGTACATGGGCACACTTTCTTATGAACAATTT | 5602 |
| gb:MT039887 | Organism:Severe | ACAACCCTTAAGGGTGTAGAAGCTGTTATGTACATGGGCACACTTTCTTATGAACAATTT | 5602 |
| gb:MT019530 | Organism:Severe | ACAACCCTTAAGGGTGTAGAAGCTGTTATGTACATGGGCACACTTTCTTATGAACAATTT | 5602 |
| gb:MT039888 | Organism:Severe | ACAACCCTTAAGGGTGTAGAAGCTGTTATGTACATGGGCACACTTTCTTATGAACAATTT | 5602 |
| gb:LC522972 | Organism:Severe | ACAACCCTTAAGGGTGTAGAAGCTGTTATGTACATGGGCACACTTTCTTATGAACAATTT | 5599 |
| gb:MT027063 | Organism:Severe | ACAACCCTTAAGGGTGTAGAAGCTGTTATGTACATGGGCACACTTTCTTATGAACAATTT | 5602 |
| gb:MT027062 | Organism:Severe | ACAACCCTTAAGGGTGTAGAAGCTGTTATGTACATGGGCACACTTTCTTATGAACAATTT | 5602 |
| gb:MT019529 | Organism:Severe | ACAACCCTTAAGGGTGTAGAAGCTGTTATGTACATGGGCACACTTTCTTATGAACAATTT | 5602 |
| gb:MN996529 | Organism:Severe | ACAACCCTTAAGGGTGTAGAAGCTGTTATGTACATGGGCACACTTTCTTATGAACAATTT | 5590 |
| gb:MN996531 | Organism:Severe | ACAACCCTTAAGGGTGTAGAAGCTGTTATGTACATGGGCACACTTTCTTATGAACAATTT | 5589 |
| gb:MT066176 | Organism:Severe | ACAACCCTTAAGGGTGTAGAAGCTGTTATGTACATGGGCACACTTTCTTATGAACAATTT | 5602 |
| gb:MT027064 | Organism:Severe | ACAACCCTTAAGGGTGTAGAAGCTGTTATGTACATGGGCACACTTTCTTATGAACAATTT | 5602 |
| gb:MN994468 | Organism:Severe | ACAACCCTTAAGGGTGTAGAAGCTGTTATGTACATGGGCACACTTTCTTATGAACAATTT | 5602 |
| gb:MT072688 | Organism:Severe | ACAACCCTTAAGGGTGTAGAAGCTGTTATGTACATGGGCACACTTTCTTATGAACAATTT | 5587 |
| gb:MN996527 | Organism:Severe | ACAACCCTTAAGGGTGTAGAAGCTGTTATGTACATGGGCACACTTTCTTATGAACAATTT | 5569 |
| gb:MT093631 | Organism:Severe | ACAACCCTTAAGGGTGTAGAAGCTGTTATGTACATGGGCACACTTTCTTATGAACAATTT | 5640 |
| gb:MT106053 | Organism:Severe | ACAACCCTTAAGGGTGTAGAAGCTGTTATGTACATGGGCACACTTTCTTATGAACAATTT | 5602 |
| gb:MT019533 | Organism:Severe | ACAACCCTTAAGGGTGTAGAAGCTGTTATGTACATGGGCACACTTTCTTATGAACAATTT | 5602 |
| gb:MT019531 | Organism:Severe | ACAACCCTTAAGGGTGTAGAAGCTGTTATGTACATGGGCACACTTTCTTATGAACAATTT | 5602 |
| gb:MN996528 | Organism:Severe | ACAACCCTTAAGGGTGTAGAAGCTGTTATGTACATGGGCACACTTTCTTATGAACAATTT | 5602 |
| gb:MN996530 | Organism:Severe | ACAACCCTTAAGGGTGTAGAAGCTGTTATGTACATGGGCACACTTTCTTATGAACAATTT | 5588 |
| gb:MN908947 | Organism:Severe | ACAACCCTTAAGGGTGTAGAAGCTGTTATGTACATGGGCACACTTTCTTATGAACAATTT | 5602 |
| gb:MT019532 | Organism:Severe | ACAACCCTTAAGGGTGTAGAAGCTGTTATGTACATGGGCACACTTTCTTATGAACAATTT | 5602 |

\*\*\*\*\*

|             |                 |                                                               |      |
|-------------|-----------------|---------------------------------------------------------------|------|
| gb:MT020781 | Organism:Severe | AAGAAAGGTGTTTCAGATACCTTGTACGTGTGGTAAACAAGCTACAAAATATCTAGTACAA | 5650 |
| gb:MT007544 | Organism:Severe | AAGAAAGGTGTTTCAGATACCTTGTACGTGTGGTAAACAAGCTACAAAATATCTAGTACAA | 5662 |
| gb:MN994467 | Organism:Severe | AAGAAAGGTGTTTCAGATACCTTGTACGTGTGGTAAACAAGCTACAAAATATCTAGTACAA | 5662 |
| gb:MT044257 | Organism:Severe | AAGAAAGGTGTTTCAGATACCTTGTACGTGTGGTAAACAAGCTACAAAATATCTAGTACAA | 5662 |
| gb:MT106054 | Organism:Severe | AAGAAAGGTGTTTCAGATACCTTGTACGTGTGGTAAACAAGCTACAAAATATCTAGTACAA | 5662 |
| gb:MT049951 | Organism:Severe | AAGAAAGGTGTTTCAGATACCTTGTACGTGTGGTAAACAAGCTACAAAATATCTAGTACAA | 5662 |
| gb:MN975262 | Organism:Severe | AAGAAAGGTGTTTCAGATACCTTGTACGTGTGGTAAACAAGCTACAAAATATCTAGTACAA | 5662 |
| gb:MT106052 | Organism:Severe | AAGAAAGGTGTTTCAGATACCTTGTACGTGTGGTAAACAAGCTACAAAATATCTAGTACAA | 5662 |
| gb:LC522975 | Organism:Severe | AAGAAAGGTGTTTCAGATACCTTGTACGTGTGGTAAACAAGCTACAAAATATCTAGTACAA | 5659 |
| gb:LC522973 | Organism:Severe | AAGAAAGGTGTTTCAGATACCTTGTACGTGTGGTAAACAAGCTACAAAATATCTAGTACAA | 5659 |
| gb:LC522974 | Organism:Severe | AAGAAAGGTGTTTCAGATACCTTGTACGTGTGGTAAACAAGCTACAAAATATCTAGTACAA | 5659 |
| gb:MN985325 | Organism:Severe | AAGAAAGGTGTTTCAGATACCTTGTACGTGTGGTAAACAAGCTACAAAATATCTAGTACAA | 5662 |
| gb:MT020881 | Organism:Severe | AAGAAAGGTGTTTCAGATACCTTGTACGTGTGGTAAACAAGCTACAAAATATCTAGTACAA | 5662 |
| gb:MT020880 | Organism:Severe | AAGAAAGGTGTTTCAGATACCTTGTACGTGTGGTAAACAAGCTACAAAATATCTAGTACAA | 5662 |
| gb:MT066175 | Organism:Severe | AAGAAAGGTGTTTCAGATACCTTGTACGTGTGGTAAACAAGCTACAAAATATCTAGTACAA | 5662 |
| gb:MN997409 | Organism:Severe | AAGAAAGGTGTTTCAGATACCTTGTACGTGTGGTAAACAAGCTACAAAATATCTAGTACAA | 5662 |
| gb:MN938384 | Organism:Severe | AAGAAAGGTGTTTCAGATACCTTGTACGTGTGGTAAACAAGCTACAAAATATCTAGTACAA | 5630 |
| gb:MT044258 | Organism:Severe | AAGAAAGGTGTTTCAGATACCTTGTACGTGTGGTAAACAAGCTACAAAATATCTAGTACAA | 5638 |
| gb:MT039890 | Organism:Severe | AAGAAAGGTGTTTCAGATACCTTGTACGTGTGGTAAACAAGCTACAAAATATCTAGTACAA | 5662 |
| gb:MN988713 | Organism:Severe | AAGAAAGGTGTTTCAGATACCTTGTACGTGTGGTAAACAAGCTACAAAATATCTAGTACAA | 5662 |
| gb:LC521925 | Organism:Severe | AAGAAAGGTGTTTCAGATACCTTGTACGTGTGGTAAACAAGCTACAAAATATCTAGTACAA | 5635 |
| gb:MT093571 | Organism:Severe | AAGAAAGGTGTTTCAGATACCTTGTACGTGTGGTAAACAAGCTACAAAATATCTAGTACAA | 5662 |
| gb:MT039887 | Organism:Severe | AAGAAAGGTGTTTCAGATACCTTGTACGTGTGGTAAACAAGCTACAAAATATCTAGTACAA | 5662 |
| gb:MT019530 | Organism:Severe | AAGAAAGGTGTTTCAGATACCTTGTACGTGTGGTAAACAAGCTACAAAATATCTAGTACAA | 5662 |
| gb:MT039888 | Organism:Severe | AAGAAAGGTGTTTCAGATACCTTGTACGTGTGGTAAACAAGCTACAAAATATCTAGTACAA | 5662 |
| gb:LC522972 | Organism:Severe | AAGAAAGGTGTTTCAGATACCTTGTACGTGTGGTAAACAAGCTACAAAATATCTAGTACAA | 5659 |
| gb:MT027063 | Organism:Severe | AAGAAAGGTGTTTCAGATACCTTGTACGTGTGGTAAACAAGCTACAAAATATCTAGTACAA | 5662 |

|             |                 |                                                             |      |
|-------------|-----------------|-------------------------------------------------------------|------|
| gb:MT027062 | Organism:Severe | AAGAAAGTGTTCAGATACCTTGTACGTGTGGTAAACAAGCTACAAAATATCTAGTACAA | 5662 |
| gb:MT019529 | Organism:Severe | AAGAAAGTGTTCAGATACCTTGTACGTGTGGTAAACAAGCTACAAAATATCTAGTACAA | 5662 |
| gb:MN996529 | Organism:Severe | AAGAAAGTGTTCAGATACCTTGTACGTGTGGTAAACAAGCTACAAAATATCTAGTACAA | 5650 |
| gb:MN996531 | Organism:Severe | AAGAAAGTGTTCAGATACCTTGTACGTGTGGTAAACAAGCTACAAAATATCTAGTACAA | 5649 |
| gb:MT066176 | Organism:Severe | AAGAAAGTGTTCAGATACCTTGTACGTGTGGTAAACAAGCTACAAAATATCTAGTACAA | 5662 |
| gb:MT027064 | Organism:Severe | AAGAAAGTGTTCAGATACCTTGTACGTGTGGTAAACAAGCTACAAAATATCTAGTACAA | 5662 |
| gb:MN994468 | Organism:Severe | AAGAAAGTGTTCAGATACCTTGTACGTGTGGTAAACAAGCTACAAAATATCTAGTACAA | 5662 |
| gb:MT072688 | Organism:Severe | AAGAAAGTGTTCAGATACCTTGTACGTGTGGTAAACAAGCTACAAAATATCTAGTACAA | 5647 |
| gb:MN996527 | Organism:Severe | AAGAAAGTGTTCAGATACCTTGTACGTGTGGTAAACAAGCTACAAAATATCTAGTACAA | 5629 |
| gb:MT093631 | Organism:Severe | AAGAAAGTGTTCAGATACCTTGTACGTGTGGTAAACAAGCTACAAAATATCTAGTACAA | 5700 |
| gb:MT106053 | Organism:Severe | AAGAAAGTGTTCAGATACCTTGTACGTGTGGTAAACAAGCTACAAAATATCTAGTACAA | 5662 |
| gb:MT019533 | Organism:Severe | AAGAAAGTGTTCAGATACCTTGTACGTGTGGTAAACAAGCTACAAAATATCTAGTACAA | 5662 |
| gb:MT019531 | Organism:Severe | AAGAAAGTGTTCAGATACCTTGTACGTGTGGTAAACAAGCTACAAAATATCTAGTACAA | 5662 |
| gb:MN996528 | Organism:Severe | AAGAAAGTGTTCAGATACCTTGTACGTGTGGTAAACAAGCTACAAAATATCTAGTACAA | 5662 |
| gb:MN996530 | Organism:Severe | AAGAAAGTGTTCAGATACCTTGTACGTGTGGTAAACAAGCTACAAAATATCTAGTACAA | 5648 |
| gb:MN908947 | Organism:Severe | AAGAAAGTGTTCAGATACCTTGTACGTGTGGTAAACAAGCTACAAAATATCTAGTACAA | 5662 |
| gb:MT019532 | Organism:Severe | AAGAAAGTGTTCAGATACCTTGTACGTGTGGTAAACAAGCTACAAAATATCTAGTACAA | 5662 |

\*\*\*\*\*

|             |                 |                                                             |      |
|-------------|-----------------|-------------------------------------------------------------|------|
| gb:MT020781 | Organism:Severe | CAGGAGTCACCTTTTGTATGATGTCAGCACCACCTGCTCAGTATGAACCTAAGCATGGT | 5710 |
| gb:MT007544 | Organism:Severe | CAGGAGTCACCTTTTGTATGATGTCAGCACCACCTGCTCAGTATGAACCTAAGCATGGT | 5722 |
| gb:MN994467 | Organism:Severe | CAGGAGTCACCTTTTGTATGATGTCAGCACCACCTGCTCAGTATGAACCTAAGCATGGT | 5722 |
| gb:MT044257 | Organism:Severe | CAGGAGTCACCTTTTGTATGATGTCAGCACCACCTGCTCAGTATGAACCTAAGCATGGT | 5722 |
| gb:MT106054 | Organism:Severe | CAGGAGTCACCTTTTGTATGATGTCAGCACCACCTGCTCAGTATGAACCTAAGCATGGT | 5722 |
| gb:MT049951 | Organism:Severe | CAGGAGTCACCTTTTGTATGATGTCAGCACCACCTGCTCAGTATGAACCTAAGCATGGT | 5722 |
| gb:MN975262 | Organism:Severe | CAGGAGTCACCTTTTGTATGATGTCAGCACCACCTGCTCAGTATGAACCTAAGCATGGT | 5722 |
| gb:MT106052 | Organism:Severe | CAGGAGTCACCTTTTGTATGATGTCAGCACCACCTGCTCAGTATGAACCTAAGCATGGT | 5722 |
| gb:LC522975 | Organism:Severe | CAGGAGTCACCTTTTGTATGATGTCAGCACCACCTGCTCAGTATGAACCTAAGCATGGT | 5719 |
| gb:LC522973 | Organism:Severe | CAGGAGTCACCTTTTGTATGATGTCAGCACCACCTGCTCAGTATGAACCTAAGCATGGT | 5719 |
| gb:LC522974 | Organism:Severe | CAGGAGTCACCTTTTGTATGATGTCAGCACCACCTGCTCAGTATGAACCTAAGCATGGT | 5719 |
| gb:MN985325 | Organism:Severe | CAGGAGTCACCTTTTGTATGATGTCAGCACCACCTGCTCAGTATGAACCTAAGCATGGT | 5722 |
| gb:MT020881 | Organism:Severe | CAGGAGTCACCTTTTGTATGATGTCAGCACCACCTGCTCAGTATGAACCTAAGCATGGT | 5722 |
| gb:MT020880 | Organism:Severe | CAGGAGTCACCTTTTGTATGATGTCAGCACCACCTGCTCAGTATGAACCTAAGCATGGT | 5722 |
| gb:MT066175 | Organism:Severe | CAGGAGTCACCTTTTGTATGATGTCAGCACCACCTGCTCAGTATGAACCTAAGCATGGT | 5722 |
| gb:MN997409 | Organism:Severe | CAGGAGTCACCTTTTGTATGATGTCAGCACCACCTGCTCAGTATGAACCTAAGCATGGT | 5722 |
| gb:MN938384 | Organism:Severe | CAGGAGTCACCTTTTGTATGATGTCAGCACCACCTGCTCAGTATGAACCTAAGCATGGT | 5690 |
| gb:MT044258 | Organism:Severe | CAGGAGTCACCTTTTGTATGATGTCAGCACCACCTGCTCAGTATGAACCTAAGCATGGT | 5698 |
| gb:MT039890 | Organism:Severe | CAGGAGTCACCTTTTGTATGATGTCAGCACCACCTGCTCAGTATGAACCTAAGCATGGT | 5722 |
| gb:MN988713 | Organism:Severe | CAGGAGTCACCTTTTGTATGATGTCAGCACCACCTGCTCAGTATGAACCTAAGCATGGT | 5722 |
| gb:LC521925 | Organism:Severe | CAGGAGTCACCTTTTGTATGATGTCAGCACCACCTGCTCAGTATGAACCTAAGCATGGT | 5695 |
| gb:MT093571 | Organism:Severe | CAGGAGTCACCTTTTGTATGATGTCAGCACCACCTGCTCAGTATGAACCTAAGCATGGT | 5722 |
| gb:MT039887 | Organism:Severe | CAGGAGTCACCTTTTGTATGATGTCAGCACCACCTGCTCAGTATGAACCTAAGCATGGT | 5722 |
| gb:MT019530 | Organism:Severe | CAGGAGTCACCTTTTGTATGATGTCAGCACCACCTGCTCAGTATGAACCTAAGCATGGT | 5722 |
| gb:MT039888 | Organism:Severe | CAGGAGTCACCTTTTGTATGATGTCAGCACCACCTGCTCAGTATGAACCTAAGCATGGT | 5722 |
| gb:LC522972 | Organism:Severe | CAGGAGTCACCTTTTGTATGATGTCAGCACCACCTGCTCAGTATGAACCTAAGCATGGT | 5719 |
| gb:MT027063 | Organism:Severe | CAGGAGTCACCTTTTGTATGATGTCAGCACCACCTGCTCAGTATGAACCTAAGCATGGT | 5722 |
| gb:MT027062 | Organism:Severe | CAGGAGTCACCTTTTGTATGATGTCAGCACCACCTGCTCAGTATGAACCTAAGCATGGT | 5722 |
| gb:MT019529 | Organism:Severe | CAGGAGTCACCTTTTGTATGATGTCAGCACCACCTGCTCAGTATGAACCTAAGCATGGT | 5722 |
| gb:MN996529 | Organism:Severe | CAGGAGTCACCTTTTGTATGATGTCAGCACCACCTGCTCAGTATGAACCTAAGCATGGT | 5710 |
| gb:MN996531 | Organism:Severe | CAGGAGTCACCTTTTGTATGATGTCAGCACCACCTGCTCAGTATGAACCTAAGCATGGT | 5709 |
| gb:MT066176 | Organism:Severe | CAGGAGTCACCTTTTGTATGATGTCAGCACCACCTGCTCAGTATGAACCTAAGCATGGT | 5722 |
| gb:MT027064 | Organism:Severe | CAGGAGTCACCTTTTGTATGATGTCAGCACCACCTGCTCAGTATGAACCTAAGCATGGT | 5722 |
| gb:MN994468 | Organism:Severe | CAGGAGTCACCTTTTGTATGATGTCAGCACCACCTGCTCAGTATGAACCTAAGCATGGT | 5722 |
| gb:MT072688 | Organism:Severe | CAGGAGTCACCTTTTGTATGATGTCAGCACCACCTGCTCAGTATGAACCTAAGCATGGT | 5707 |
| gb:MN996527 | Organism:Severe | CAGGAGTCACCTTTTGTATGATGTCAGCACCACCTGCTCAGTATGAACCTAAGCATGGT | 5689 |
| gb:MT093631 | Organism:Severe | CAGGAGTCACCTTTTGTATGATGTCAGCACCACCTGCTCAGTATGAACCTAAGCATGGT | 5760 |
| gb:MT106053 | Organism:Severe | CAGGAGTCACCTTTTGTATGATGTCAGCACCACCTGCTCAGTATGAACCTAAGCATGGT | 5722 |
| gb:MT019533 | Organism:Severe | CAGGAGTCACCTTTTGTATGATGTCAGCACCACCTGCTCAGTATGAACCTAAGCATGGT | 5722 |
| gb:MT019531 | Organism:Severe | CAGGAGTCACCTTTTGTATGATGTCAGCACCACCTGCTCAGTATGAACCTAAGCATGGT | 5722 |
| gb:MN996528 | Organism:Severe | CAGGAGTCACCTTTTGTATGATGTCAGCACCACCTGCTCAGTATGAACCTAAGCATGGT | 5722 |
| gb:MN996530 | Organism:Severe | CAGGAGTCACCTTTTGTATGATGTCAGCACCACCTGCTCAGTATGAACCTAAGCATGGT | 5708 |
| gb:MN908947 | Organism:Severe | CAGGAGTCACCTTTTGTATGATGTCAGCACCACCTGCTCAGTATGAACCTAAGCATGGT | 5722 |
| gb:MT019532 | Organism:Severe | CAGGAGTCACCTTTTGTATGATGTCAGCACCACCTGCTCAGTATGAACCTAAGCATGGT | 5722 |

\*\*\*\*\*

|             |                 |                                                              |      |
|-------------|-----------------|--------------------------------------------------------------|------|
| gb:MT020781 | Organism:Severe | ACATTTACTTGTGCTAGTGAGTACACTGGTAATTACCAGTGTGGTCACTATAAACATATA | 5770 |
| gb:MT007544 | Organism:Severe | ACATTTACTTGTGCTAGTGAGTACACTGGTAATTACCAGTGTGGTCACTATAAACATATA | 5782 |
| gb:MN994467 | Organism:Severe | ACATTTACTTGTGCTAGTGAGTACACTGGTAATTACCAGTGTGGTCACTATAAACATATA | 5782 |
| gb:MT044257 | Organism:Severe | ACATTTACTTGTGCTAGTGAGTACACTGGTAATTACCAGTGTGGTCACTATAAACATATA | 5782 |
| gb:MT106054 | Organism:Severe | ACATTTACTTGTGCTAGTGAGTACACTGGTAATTACCAGTGTGGTCACTATAAACATATA | 5782 |
| gb:MT049951 | Organism:Severe | ACATTTACTTGTGCTAGTGAGTACACTGGTAATTACCAGTGTGGTCACTATAAACATATA | 5782 |
| gb:MN975262 | Organism:Severe | ACATTTACTTGTGCTAGTGAGTACACTGGTAATTACCAGTGTGGTCACTATAAACATATA | 5782 |
| gb:MT106052 | Organism:Severe | ACATTTACTTGTGCTAGTGAGTACACTGGTAATTACCAGTGTGGTCACTATAAACATATA | 5782 |
| gb:LC522975 | Organism:Severe | ACATTTACTTGTGCTAGTGAGTACACTGGTAATTACCAGTGTGGTCACTATAAACATATA | 5779 |
| gb:LC522973 | Organism:Severe | ACATTTACTTGTGCTAGTGAGTACACTGGTAATTACCAGTGTGGTCACTATAAACATATA | 5779 |
| gb:LC522974 | Organism:Severe | ACATTTACTTGTGCTAGTGAGTACACTGGTAATTACCAGTGTGGTCACTATAAACATATA | 5779 |
| gb:MN985325 | Organism:Severe | ACATTTACTTGTGCTAGTGAGTACACTGGTAATTACCAGTGTGGTCACTATAAACATATA | 5782 |
| gb:MT020881 | Organism:Severe | ACATTTACTTGTGCTAGTGAGTACACTGGTAATTACCAGTGTGGTCACTATAAACATATA | 5782 |
| gb:MT020880 | Organism:Severe | ACATTTACTTGTGCTAGTGAGTACACTGGTAATTACCAGTGTGGTCACTATAAACATATA | 5782 |
| gb:MT066175 | Organism:Severe | ACATTTACTTGTGCTAGTGAGTACACTGGTAATTACCAGTGTGGTCACTATAAACATATA | 5782 |
| gb:MN997409 | Organism:Severe | ACATTTACTTGTGCTAGTGAGTACACTGGTAATTACCAGTGTGGTCACTATAAACATATA | 5782 |
| gb:MN938384 | Organism:Severe | ACATTTACTTGTGCTAGTGAGTACACTGGTAATTACCAGTGTGGTCACTATAAACATATA | 5750 |
| gb:MT044258 | Organism:Severe | ACATTTACTTGTGCTAGTGAGTACACTGGTAATTACCAGTGTGGTCACTATAAACATATA | 5758 |
| gb:MT039890 | Organism:Severe | ACATTTACTTGTGCTAGTGAGTACACTGGTAATTACCAGTGTGGTCACTATAAACATATA | 5782 |
| gb:MN988713 | Organism:Severe | ACATTTACTTGTGCTAGTGAGTACACTGGTAATTACCAGTGTGGTCACTATAAACATATA | 5782 |
| gb:LC521925 | Organism:Severe | ACATTTACTTGTGCTAGTGAGTACACTGGTAATTACCAGTGTGGTCACTATAAACATATA | 5755 |
| gb:MT093571 | Organism:Severe | ACATTTACTTGTGCTAGTGAGTACACTGGTAATTACCAGTGTGGTCACTATAAACATATA | 5782 |
| gb:MT039887 | Organism:Severe | ACATTTACTTGTGCTAGTGAGTACACTGGTAATTACCAGTGTGGTCACTATAAACATATA | 5782 |
| gb:MT019530 | Organism:Severe | ACATTTACTTGTGCTAGTGAGTACACTGGTAATTACCAGTGTGGTCACTATAAACATATA | 5782 |
| gb:MT039888 | Organism:Severe | ACATTTACTTGTGCTAGTGAGTACACTGGTAATTACCAGTGTGGTCACTATAAACATATA | 5782 |
| gb:LC522972 | Organism:Severe | ACATTTACTTGTGCTAGTGAGTACACTGGTAATTACCAGTGTGGTCACTATAAACATATA | 5779 |
| gb:MT027063 | Organism:Severe | ACATTTACTTGTGCTAGTGAGTACACTGGTAATTACCAGTGTGGTCACTATAAACATATA | 5782 |
| gb:MT027062 | Organism:Severe | ACATTTACTTGTGCTAGTGAGTACACTGGTAATTACCAGTGTGGTCACTATAAACATATA | 5782 |
| gb:MT019529 | Organism:Severe | ACATTTACTTGTGCTAGTGAGTACACTGGTAATTACCAGTGTGGTCACTATAAACATATA | 5782 |
| gb:MN996529 | Organism:Severe | ACATTTACTTGTGCTAGTGAGTACACTGGTAATTACCAGTGTGGTCACTATAAACATATA | 5770 |
| gb:MN996531 | Organism:Severe | ACATTTACTTGTGCTAGTGAGTACACTGGTAATTACCAGTGTGGTCACTATAAACATATA | 5769 |
| gb:MT066176 | Organism:Severe | ACATTTACTTGTGCTAGTGAGTACACTGGTAATTACCAGTGTGGTCACTATAAACATATA | 5782 |
| gb:MT027064 | Organism:Severe | ACATTTACTTGTGCTAGTGAGTACACTGGTAATTACCAGTGTGGTCACTATAAACATATA | 5782 |
| gb:MN994468 | Organism:Severe | ACATTTACTTGTGCTAGTGAGTACACTGGTAATTACCAGTGTGGTCACTATAAACATATA | 5782 |
| gb:MT072688 | Organism:Severe | ACATTTACTTGTGCTAGTGAGTACACTGGTAATTACCAGTGTGGTCACTATAAACATATA | 5767 |
| gb:MN996527 | Organism:Severe | ACATTTACTTGTGCTAGTGAGTACACTGGTAATTACCAGTGTGGTCACTATAAACATATA | 5749 |
| gb:MT093631 | Organism:Severe | ACATTTACTTGTGCTAGTGAGTACACTGGTAATTACCAGTGTGGTCACTATAAACATATA | 5820 |
| gb:MT106053 | Organism:Severe | ACATTTACTTGTGCTAGTGAGTACACTGGTAATTACCAGTGTGGTCACTATAAACATATA | 5782 |
| gb:MT019533 | Organism:Severe | ACATTTACTTGTGCTAGTGAGTACACTGGTAATTACCAGTGTGGTCACTATAAACATATA | 5782 |
| gb:MT019531 | Organism:Severe | ACATTTACTTGTGCTAGTGAGTACACTGGTAATTACCAGTGTGGTCACTATAAACATATA | 5782 |
| gb:MN996528 | Organism:Severe | ACATTTACTTGTGCTAGTGAGTACACTGGTAATTACCAGTGTGGTCACTATAAACATATA | 5782 |
| gb:MN996530 | Organism:Severe | ACATTTACTTGTGCTAGTGAGTACACTGGTAATTACCAGTGTGGTCACTATAAACATATA | 5768 |
| gb:MN908947 | Organism:Severe | ACATTTACTTGTGCTAGTGAGTACACTGGTAATTACCAGTGTGGTCACTATAAACATATA | 5782 |
| gb:MT019532 | Organism:Severe | ACATTTACTTGTGCTAGTGAGTACACTGGTAATTACCAGTGTGGTCACTATAAACATATA | 5782 |

\*\*\*\*\*

|             |                 |                                                             |      |
|-------------|-----------------|-------------------------------------------------------------|------|
| gb:MT020781 | Organism:Severe | ACTTCTAAAGAACTTTGTATTGCATAGACGGTGCCTTACTTACAAAGTCCTCAGAATAC | 5830 |
| gb:MT007544 | Organism:Severe | ACTTCTAAAGAACTTTGTATTGCATAGACGGTGCCTTACTTACAAAGTCCTCAGAATAC | 5842 |
| gb:MN994467 | Organism:Severe | ACTTCTAAAGAACTTTGTATTGCATAGACGGTGCCTTACTTACAAAGTCCTCAGAATAC | 5842 |
| gb:MT044257 | Organism:Severe | ACTTCTAAAGAACTTTGTATTGCATAGACGGTGCCTTACTTACAAAGTCCTCAGAATAC | 5842 |
| gb:MT106054 | Organism:Severe | ACTTCTAAAGAACTTTGTATTGCATAGACGGTGCCTTACTTACAAAGTCCTCAGAATAC | 5842 |
| gb:MT049951 | Organism:Severe | ACTTCTAAAGAACTTTGTATTGCATAGACGGTGCCTTACTTACAAAGTCCTCAGAATAC | 5842 |
| gb:MN975262 | Organism:Severe | ACTTCTAAAGAACTTTGTATTGCATAGACGGTGCCTTACTTACAAAGTCCTCAGAATAC | 5842 |
| gb:MT106052 | Organism:Severe | ACTTCTAAAGAACTTTGTATTGCATAGACGGTGCCTTACTTACAAAGTCCTCAGAATAC | 5842 |
| gb:LC522975 | Organism:Severe | ACTTCTAAAGAACTTTGTATTGCATAGACGGTGCCTTACTTACAAAGTCCTCAGAATAC | 5839 |
| gb:LC522973 | Organism:Severe | ACTTCTAAAGAACTTTGTATTGCATAGACGGTGCCTTACTTACAAAGTCCTCAGAATAC | 5839 |
| gb:LC522974 | Organism:Severe | ACTTCTAAAGAACTTTGTATTGCATAGACGGTGCCTTACTTACAAAGTCCTCAGAATAC | 5839 |
| gb:MN985325 | Organism:Severe | ACTTCTAAAGAACTTTGTATTGCATAGACGGTGCCTTACTTACAAAGTCCTCAGAATAC | 5842 |
| gb:MT020881 | Organism:Severe | ACTTCTAAAGAACTTTGTATTGCATAGACGGTGCCTTACTTACAAAGTCCTCAGAATAC | 5842 |
| gb:MT020880 | Organism:Severe | ACTTCTAAAGAACTTTGTATTGCATAGACGGTGCCTTACTTACAAAGTCCTCAGAATAC | 5842 |
| gb:MT066175 | Organism:Severe | ACTTCTAAAGAACTTTGTATTGCATAGACGGTGCCTTACTTACAAAGTCCTCAGAATAC | 5842 |
| gb:MN997409 | Organism:Severe | ACTTCTAAAGAACTTTGTATTGCATAGACGGTGCCTTACTTACAAAGTCCTCAGAATAC | 5842 |
| gb:MN938384 | Organism:Severe | ACTTCTAAAGAACTTTGTATTGCATAGACGGTGCCTTACTTACAAAGTCCTCAGAATAC | 5810 |
| gb:MT044258 | Organism:Severe | ACTTCTAAAGAACTTTGTATTGCATAGACGGTGCCTTACTTACAAAGTCCTCAGAATAC | 5818 |
| gb:MT039890 | Organism:Severe | ACTTCTAAAGAACTTTGTATTGCATAGACGGTGCCTTACTTACAAAGTCCTCAGAATAC | 5842 |

|             |                 |                                                             |      |
|-------------|-----------------|-------------------------------------------------------------|------|
| gb:MN988713 | Organism:Severe | ACTTCTAAAGAACTTTGTATTGCATAGACGGTGCTTTACTTACAAAGTCCTCAGAATAC | 5842 |
| gb:LC521925 | Organism:Severe | ACTTCTAAAGAACTTTGTATTGCATAGACGGTGCTTTACTTACAAAGTCCTCAGAATAC | 5815 |
| gb:MT093571 | Organism:Severe | ACTTCTAAAGAACTTTGTATTGCATAGACGGTGCTTTACTTACAAAGTCCTCAGAATAC | 5842 |
| gb:MT039887 | Organism:Severe | ACTTCTAAAGAACTTTGTATTGCATAGACGGTGCTTTACTTACAAAGTCCTCAGAATAC | 5842 |
| gb:MT019530 | Organism:Severe | ACTTCTAAAGAACTTTGTATTGCATAGACGGTGCTTTACTTACAAAGTCCTCAGAATAC | 5842 |
| gb:MT039888 | Organism:Severe | ACTTCTAAAGAACTTTGTATTGCATAGACGGTGCTTTACTTACAAAGTCCTCAGAATAC | 5842 |
| gb:LC522972 | Organism:Severe | ACTTCTAAAGAACTTTGTATTGCATAGACGGTGCTTTACTTACAAAGTCCTCAGAATAC | 5839 |
| gb:MT027063 | Organism:Severe | ACTTCTAAAGAACTTTGTATTGCATAGACGGTGCTTTACTTACAAAGTCCTCAGAATAC | 5842 |
| gb:MT027062 | Organism:Severe | ACTTCTAAAGAACTTTGTATTGCATAGACGGTGCTTTACTTACAAAGTCCTCAGAATAC | 5842 |
| gb:MT019529 | Organism:Severe | ACTTCTAAAGAACTTTGTATTGCATAGACGGTGCTTTACTTACAAAGTCCTCAGAATAC | 5842 |
| gb:MN996529 | Organism:Severe | ACTTCTAAAGAACTTTGTATTGCATAGACGGTGCTTTACTTACAAAGTCCTCAGAATAC | 5830 |
| gb:MN996531 | Organism:Severe | ACTTCTAAAGAACTTTGTATTGCATAGACGGTGCTTTACTTACAAAGTCCTCAGAATAC | 5829 |
| gb:MT066176 | Organism:Severe | ACTTCTAAAGAACTTTGTATTGCATAGACGGTGCTTTACTTACAAAGTCCTCAGAATAC | 5842 |
| gb:MT027064 | Organism:Severe | ACTTCTAAAGAACTTTGTATTGCATAGACGGTGCTTTACTTACAAAGTCCTCAGAATAC | 5842 |
| gb:MN994468 | Organism:Severe | ACTTCTAAAGAACTTTGTATTGCATAGACGGTGCTTTACTTACAAAGTCCTCAGAATAC | 5842 |
| gb:MT072688 | Organism:Severe | ACTTCTAAAGAACTTTGTATTGCATAGACGGTGCTTTACTTACAAAGTCCTCAGAATAC | 5827 |
| gb:MN996527 | Organism:Severe | ACTTCTAAAGAACTTTGTATTGCATAGACGGTGCTTTACTTACAAAGTCCTCAGAATAC | 5809 |
| gb:MT093631 | Organism:Severe | ACTTCTAAAGAACTTTGTATTGCATAGACGGTGCTTTACTTACAAAGTCCTCAGAATAC | 5880 |
| gb:MT106053 | Organism:Severe | ACTTCTAAAGAACTTTGTATTGCATAGACGGTGCTTTACTTACAAAGTCCTCAGAATAC | 5842 |
| gb:MT019533 | Organism:Severe | ACTTCTAAAGAACTTTGTATTGCATAGACGGTGCTTTACTTACAAAGTCCTCAGAATAC | 5842 |
| gb:MT019531 | Organism:Severe | ACTTCTAAAGAACTTTGTATTGCATAGACGGTGCTTTACTTACAAAGTCCTCAGAATAC | 5842 |
| gb:MN996528 | Organism:Severe | ACTTCTAAAGAACTTTGTATTGCATAGACGGTGCTTTACTTACAAAGTCCTCAGAATAC | 5842 |
| gb:MN996530 | Organism:Severe | ACTTCTAAAGAACTTTGTATTGCATAGACGGTGCTTTACTTACAAAGTCCTCAGAATAC | 5828 |
| gb:MN908947 | Organism:Severe | ACTTCTAAAGAACTTTGTATTGCATAGACGGTGCTTTACTTACAAAGTCCTCAGAATAC | 5842 |
| gb:MT019532 | Organism:Severe | ACTTCTAAAGAACTTTGTATTGCATAGACGGTGCTTTACTTACAAAGTCCTCAGAATAC | 5842 |

\*\*\*\*\*

|             |                 |                                                             |      |
|-------------|-----------------|-------------------------------------------------------------|------|
| gb:MT020781 | Organism:Severe | AAAGGTCTATTACGGATGTTTTCTACAAAGAAAACAGTTACACAACAACCATAAAACCA | 5890 |
| gb:MT007544 | Organism:Severe | AAAGGTCTATTACGGATGTTTTCTACAAAGAAAACAGTTACACAACAACCATAAAACCA | 5902 |
| gb:MN994467 | Organism:Severe | AAAGGTCTATTACGGATGTTTTCTACAAAGAAAACAGTTACACAACAACCATAAAACCA | 5902 |
| gb:MT044257 | Organism:Severe | AAAGGTCTATTACGGATGTTTTCTACAAAGAAAACAGTTACACAACAACCATAAAACCA | 5902 |
| gb:MT106054 | Organism:Severe | AAAGGTCTATTACGGATGTTTTCTACAAAGAAAACAGTTACACAACAACCATAAAACCA | 5902 |
| gb:MT049951 | Organism:Severe | AAAGGTCTATTACGGATGTTTTCTACAAAGAAAACAGTTACACAACAACCATAAAACCA | 5902 |
| gb:MN975262 | Organism:Severe | AAAGGTCTATTACGGATGTTTTCTACAAAGAAAACAGTTACACAACAACCATAAAACCA | 5902 |
| gb:MT106052 | Organism:Severe | AAAGGTCTATTACGGATGTTTTCTACAAAGAAAACAGTTACACAACAACCATAAAACCA | 5902 |
| gb:LC522975 | Organism:Severe | AAAGGTCTATTACGGATGTTTTCTACAAAGAAAACAGTTACACAACAACCATAAAACCA | 5899 |
| gb:LC522973 | Organism:Severe | AAAGGTCTATTACGGATGTTTTCTACAAAGAAAACAGTTACACAACAACCATAAAACCA | 5899 |
| gb:LC522974 | Organism:Severe | AAAGGTCTATTACGGATGTTTTCTACAAAGAAAACAGTTACACAACAACCATAAAACCA | 5899 |
| gb:MN985325 | Organism:Severe | AAAGGTCTATTACGGATGTTTTCTACAAAGAAAACAGTTACACAACAACCATAAAACCA | 5902 |
| gb:MT020881 | Organism:Severe | AAAGGTCTATTACGGATGTTTTCTACAAAGAAAACAGTTACACAACAACCATAAAACCA | 5902 |
| gb:MT020880 | Organism:Severe | AAAGGTCTATTACGGATGTTTTCTACAAAGAAAACAGTTACACAACAACCATAAAACCA | 5902 |
| gb:MT066175 | Organism:Severe | AAAGGTCTATTACGGATGTTTTCTACAAAGAAAACAGTTACACAACAACCATAAAACCA | 5902 |
| gb:MN997409 | Organism:Severe | AAAGGTCTATTACGGATGTTTTCTACAAAGAAAACAGTTACACAACAACCATAAAACCA | 5902 |
| gb:MN938384 | Organism:Severe | AAAGGTCTATTACGGATGTTTTCTACAAAGAAAACAGTTACACAACAACCATAAAACCA | 5870 |
| gb:MT044258 | Organism:Severe | AAAGGTCTATTACGGATGTTTTCTACAAAGAAAACAGTTACACAACAACCATAAAACCA | 5878 |
| gb:MT039890 | Organism:Severe | AAAGGTCTATTACGGATGTTTTCTACAAAGAAAACAGTTACACAACAACCATAAAACCA | 5902 |
| gb:MN988713 | Organism:Severe | AAAGGTCTATTACGGATGTTTTCTACAAAGAAAACAGTTACACAACAACCATAAAACCA | 5902 |
| gb:LC521925 | Organism:Severe | AAAGGTCTATTACGGATGTTTTCTACAAAGAAAACAGTTACACAACAACCATAAAACCA | 5875 |
| gb:MT093571 | Organism:Severe | AAAGGTCTATTACGGATGTTTTCTACAAAGAAAACAGTTACACAACAACCATAAAACCA | 5902 |
| gb:MT039887 | Organism:Severe | AAAGGTCTATTACGGATGTTTTCTACAAAGAAAACAGTTACACAACAACCATAAAACCA | 5902 |
| gb:MT019530 | Organism:Severe | AAAGGTCTATTACGGATGTTTTCTACAAAGAAAACAGTTACACAACAACCATAAAACCA | 5902 |
| gb:MT039888 | Organism:Severe | AAAGGTCTATTACGGATGTTTTCTACAAAGAAAACAGTTACACAACAACCATAAAACCA | 5902 |
| gb:LC522972 | Organism:Severe | AAAGGTCTATTACGGATGTTTTCTACAAAGAAAACAGTTACACAACAACCATAAAACCA | 5899 |
| gb:MT027063 | Organism:Severe | AAAGGTCTATTACGGATGTTTTCTACAAAGAAAACAGTTACACAACAACCATAAAACCA | 5902 |
| gb:MT027062 | Organism:Severe | AAAGGTCTATTACGGATGTTTTCTACAAAGAAAACAGTTACACAACAACCATAAAACCA | 5902 |
| gb:MT019529 | Organism:Severe | AAAGGTCTATTACGGATGTTTTCTACAAAGAAAACAGTTACACAACAACCATAAAACCA | 5902 |
| gb:MN996529 | Organism:Severe | AAAGGTCTATTACGGATGTTTTCTACAAAGAAAACAGTTACACAACAACCATAAAACCA | 5890 |
| gb:MN996531 | Organism:Severe | AAAGGTCTATTACGGATGTTTTCTACAAAGAAAACAGTTACACAACAACCATAAAACCA | 5889 |
| gb:MT066176 | Organism:Severe | AAAGGTCTATTACGGATGTTTTCTACAAAGAAAACAGTTACACAACAACCATAAAACCA | 5902 |
| gb:MT027064 | Organism:Severe | AAAGGTCTATTACGGATGTTTTCTACAAAGAAAACAGTTACACAACAACCATAAAACCA | 5902 |
| gb:MN994468 | Organism:Severe | AAAGGTCTATTACGGATGTTTTCTACAAAGAAAACAGTTACACAACAACCATAAAACCA | 5902 |
| gb:MT072688 | Organism:Severe | AAAGGTCTATTACGGATGTTTTCTACAAAGAAAACAGTTACACAACAACCATAAAACCA | 5887 |
| gb:MN996527 | Organism:Severe | AAAGGTCTATTACGGATGTTTTCTACAAAGAAAACAGTTACACAACAACCATAAAACCA | 5869 |
| gb:MT093631 | Organism:Severe | AAAGGTCTATTACGGATGTTTTCTACAAAGAAAACAGTTACACAACAACCATAAAACCA | 5940 |
| gb:MT106053 | Organism:Severe | AAAGGTCTATTACGGATGTTTTCTACAAAGAAAACAGTTACACAACAACCATAAAACCA | 5902 |

|             |                 |                                                              |      |
|-------------|-----------------|--------------------------------------------------------------|------|
| gb:MT019533 | Organism:Severe | AAAGGTCCTATTACGGATGTTTTCTACAAGAAAAACAGTTACACAACAACCATAAAACCA | 5902 |
| gb:MT019531 | Organism:Severe | AAAGGTCCTATTACGGATGTTTTCTACAAGAAAAACAGTTACACAACAACCATAAAACCA | 5902 |
| gb:MN996528 | Organism:Severe | AAAGGTCCTATTACGGATGTTTTCTACAAGAAAAACAGTTACACAACAACCATAAAACCA | 5902 |
| gb:MN996530 | Organism:Severe | AAAGGTCCTATTACGGATGTTTTCTACAAGAAAAACAGTTACACAACAACCATAAAACCA | 5888 |
| gb:MN908947 | Organism:Severe | AAAGGTCCTATTACGGATGTTTTCTACAAGAAAAACAGTTACACAACAACCATAAAACCA | 5902 |
| gb:MT019532 | Organism:Severe | AAAGGTCCTATTACGGATGTTTTCTACAAGAAAAACAGTTACACAACAACCATAAAACCA | 5902 |

\*\*\*\*\*

|             |                 |                                                            |      |
|-------------|-----------------|------------------------------------------------------------|------|
| gb:MT020781 | Organism:Severe | GTTACTTATAAATTGGATGGTGTGTTTGTACAGAAATTGACCTAAGTTGGACAATTAT | 5950 |
| gb:MT007544 | Organism:Severe | GTTACTTATAAATTGGATGGTGTGTTTGTACAGAAATTGACCTAAGTTGGACAATTAT | 5962 |
| gb:MN994467 | Organism:Severe | GTTACTTATAAATTGGATGGTGTGTTTGTACAGAAATTGACCTAAGTTGGACAATTAT | 5962 |
| gb:MT044257 | Organism:Severe | GTTACTTATAAATTGGATGGTGTGTTTGTACAGAAATTGACCTAAGTTGGACAATTAT | 5962 |
| gb:MT106054 | Organism:Severe | GTTACTTATAAATTGGATGGTGTGTTTGTACAGAAATTGACCTAAGTTGGACAATTAT | 5962 |
| gb:MT049951 | Organism:Severe | GTTACTTATAAATTGGATGGTGTGTTTGTACAGAAATTGACCTAAGTTGGACAATTAT | 5962 |
| gb:MN975262 | Organism:Severe | GTTACTTATAAATTGGATGGTGTGTTTGTACAGAAATTGACCTAAGTTGGACAATTAT | 5962 |
| gb:MT106052 | Organism:Severe | GTTACTTATAAATTGGATGGTGTGTTTGTACAGAAATTGACCTAAGTTGGACAATTAT | 5962 |
| gb:LC522975 | Organism:Severe | GTTACTTATAAATTGGATGGTGTGTTTGTACAGAAATTGACCTAAGTTGGACAATTAT | 5959 |
| gb:LC522973 | Organism:Severe | GTTACTTATAAATTGGATGGTGTGTTTGTACAGAAATTGACCTAAGTTGGACAATTAT | 5959 |
| gb:LC522974 | Organism:Severe | GTTACTTATAAATTGGATGGTGTGTTTGTACAGAAATTGACCTAAGTTGGACAATTAT | 5959 |
| gb:MN985325 | Organism:Severe | GTTACTTATAAATTGGATGGTGTGTTTGTACAGAAATTGACCTAAGTTGGACAATTAT | 5962 |
| gb:MT020881 | Organism:Severe | GTTACTTATAAATTGGATGGTGTGTTTGTACAGAAATTGACCTAAGTTGGACAATTAT | 5962 |
| gb:MT020880 | Organism:Severe | GTTACTTATAAATTGGATGGTGTGTTTGTACAGAAATTGACCTAAGTTGGACAATTAT | 5962 |
| gb:MT066175 | Organism:Severe | GTTACTTATAAATTGGATGGTGTGTTTGTACAGAAATTGACCTAAGTTGGACAATTAT | 5962 |
| gb:MN997409 | Organism:Severe | GTTACTTATAAATTGGATGGTGTGTTTGTACAGAAATTGACCTAAGTTGGACAATTAT | 5962 |
| gb:MN938384 | Organism:Severe | GTTACTTATAAATTGGATGGTGTGTTTGTACAGAAATTGACCTAAGTTGGACAATTAT | 5930 |
| gb:MT044258 | Organism:Severe | GTTACTTATAAATTGGATGGTGTGTTTGTACAGAAATTGACCTAAGTTGGACAATTAT | 5938 |
| gb:MT039890 | Organism:Severe | GTTACTTATAAATTGGATGGTGTGTTTGTACAGAAATTGACCTAAGTTGGACAATTAT | 5962 |
| gb:MN988713 | Organism:Severe | GTTACTTATAAATTGGATGGTGTGTTTGTACAGAAATTGACCTAAGTTGGACAATTAT | 5962 |
| gb:LC521925 | Organism:Severe | GTTACTTATAAATTGGATGGTGTGTTTGTACAGAAATTGACCTAAGTTGGACAATTAT | 5935 |
| gb:MT093571 | Organism:Severe | GTTACTTATAAATTGGATGGTGTGTTTGTACAGAAATTGACCTAAGTTGGACAATTAT | 5962 |
| gb:MT039887 | Organism:Severe | GTTACTTATAAATTGGATGGTGTGTTTGTACAGAAATTGACCTAAGTTGGACAATTAT | 5962 |
| gb:MT019530 | Organism:Severe | GTTACTTATAAATTGGATGGTGTGTTTGTACAGAAATTGACCTAAGTTGGACAATTAT | 5962 |
| gb:MT039888 | Organism:Severe | GTTACTTATAAATTGGATGGTGTGTTTGTACAGAAATTGACCTAAGTTGGACAATTAT | 5962 |
| gb:LC522972 | Organism:Severe | GTTACTTATAAATTGGATGGTGTGTTTGTACAGAAATTGACCTAAGTTGGACAATTAT | 5959 |
| gb:MT027063 | Organism:Severe | GTTACTTATAAATTGGATGGTGTGTTTGTACAGAAATTGACCTAAGTTGGACAATTAT | 5962 |
| gb:MT027062 | Organism:Severe | GTTACTTATAAATTGGATGGTGTGTTTGTACAGAAATTGACCTAAGTTGGACAATTAT | 5962 |
| gb:MT019529 | Organism:Severe | GTTACTTATAAATTGGATGGTGTGTTTGTACAGAAATTGACCTAAGTTGGACAATTAT | 5962 |
| gb:MN996529 | Organism:Severe | GTTACTTATAAATTGGATGGTGTGTTTGTACAGAAATTGACCTAAGTTGGACAATTAT | 5950 |
| gb:MN996531 | Organism:Severe | GTTACTTATAAATTGGATGGTGTGTTTGTACAGAAATTGACCTAAGTTGGACAATTAT | 5949 |
| gb:MT066176 | Organism:Severe | GTTACTTATAAATTGGATGGTGTGTTTGTACAGAAATTGACCTAAGTTGGACAATTAT | 5962 |
| gb:MT027064 | Organism:Severe | GTTACTTATAAATTGGATGGTGTGTTTGTACAGAAATTGACCTAAGTTGGACAATTAT | 5962 |
| gb:MN994468 | Organism:Severe | GTTACTTATAAATTGGATGGTGTGTTTGTACAGAAATTGACCTAAGTTGGACAATTAT | 5962 |
| gb:MT072688 | Organism:Severe | GTTACTTATAAATTGGATGGTGTGTTTGTACAGAAATTGACCTAAGTTGGACAATTAT | 5947 |
| gb:MN996527 | Organism:Severe | GTTACTTATAAATTGGATGGTGTGTTTGTACAGAAATTGACCTAAGTTGGACAATTAT | 5929 |
| gb:MT093631 | Organism:Severe | GTTACTTATAAATTGGATGGTGTGTTTGTACAGAAATTGACCTAAGTTGGACAATTAT | 6000 |
| gb:MT106053 | Organism:Severe | GTTACTTATAAATTGGATGGTGTGTTTGTACAGAAATTGACCTAAGTTGGACAATTAT | 5962 |
| gb:MT019533 | Organism:Severe | GTTACTTATAAATTGGATGGTGTGTTTGTACAGAAATTGACCTAAGTTGGACAATTAT | 5962 |
| gb:MT019531 | Organism:Severe | GTTACTTATAAATTGGATGGTGTGTTTGTACAGAAATTGACCTAAGTTGGACAATTAT | 5962 |
| gb:MN996528 | Organism:Severe | GTTACTTATAAATTGGATGGTGTGTTTGTACAGAAATTGACCTAAGTTGGACAATTAT | 5962 |
| gb:MN996530 | Organism:Severe | GTTACTTATAAATTGGATGGTGTGTTTGTACAGAAATTGACCTAAGTTGGACAATTAT | 5948 |
| gb:MN908947 | Organism:Severe | GTTACTTATAAATTGGATGGTGTGTTTGTACAGAAATTGACCTAAGTTGGACAATTAT | 5962 |
| gb:MT019532 | Organism:Severe | GTTACTTATAAATTGGATGGTGTGTTTGTACAGAAATTGACCTAAGTTGGACAATTAT | 5962 |

\*\*\*\*\*

|             |                 |                                                             |      |
|-------------|-----------------|-------------------------------------------------------------|------|
| gb:MT020781 | Organism:Severe | TATAAGAAAGACAATTCTTATTTACAGAGCAACCAATTGATCTTGTACCAAACCAACCA | 6010 |
| gb:MT007544 | Organism:Severe | TATAAGAAAGACAATTCTTATTTACAGAGCAACCAATTGATCTTGTACCAAACCAACCA | 6022 |
| gb:MN994467 | Organism:Severe | TATAAGAAAGACAATTCTTATTTACAGAGCAACCAATTGATCTTGTACCAAACCAACCA | 6022 |
| gb:MT044257 | Organism:Severe | TATAAGAAAGACAATTCTTATTTACAGAGCAACCAATTGATCTTGTACCAAACCAACCA | 6022 |
| gb:MT106054 | Organism:Severe | TATAAGAAAGACAATTCTTATTTACAGAGCAACCAATTGATCTTGTACCAAACCAACCA | 6022 |
| gb:MT049951 | Organism:Severe | TATAAGAAAGACAATTCTTATTTACAGAGCAACCAATTGATCTTGTACCAAACCAACCA | 6022 |
| gb:MN975262 | Organism:Severe | TATAAGAAAGACAATTCTTATTTACAGAGCAACCAATTGATCTTGTACCAAACCAACCA | 6022 |
| gb:MT106052 | Organism:Severe | TATAAGAAAGACAATTCTTATTTACAGAGCAACCAATTGATCTTGTACCAAACCAACCA | 6022 |
| gb:LC522975 | Organism:Severe | TATAAGAAAGACAATTCTTATTTACAGAGCAACCAATTGATCTTGTACCAAACCAACCA | 6019 |
| gb:LC522973 | Organism:Severe | TATAAGAAAGACAATTCTTATTTACAGAGCAACCAATTGATCTTGTACCAAACCAACCA | 6019 |
| gb:LC522974 | Organism:Severe | TATAAGAAAGACAATTCTTATTTACAGAGCAACCAATTGATCTTGTACCAAACCAACCA | 6019 |





|             |                 |                                                             |      |
|-------------|-----------------|-------------------------------------------------------------|------|
| gb:MN996531 | Organism:Severe | TATCCAAACGCAAGCTTCGATAATTTAAGTTTGTATGTGATAATATCAAATTTGCTGAT | 6069 |
| gb:MT066176 | Organism:Severe | TATCCAAACGCAAGCTTCGATAATTTAAGTTTGTATGTGATAATATCAAATTTGCTGAT | 6082 |
| gb:MT027064 | Organism:Severe | TATCCAAACGCAAGCTTCGATAATTTAAGTTTGTATGTGATAATATCAAATTTGCTGAT | 6082 |
| gb:MN994468 | Organism:Severe | TATCCAAACGCAAGCTTCGATAATTTAAGTTTGTATGTGATAATATCAAATTTGCTGAT | 6082 |
| gb:MT072688 | Organism:Severe | TATCCAAACGCAAGCTTCGATAATTTAAGTTTGTATGTGATAATATCAAATTTGCTGAT | 6067 |
| gb:MN996527 | Organism:Severe | TATCCAAACGCAAGCTTCGATAATTTAAGTTTGTATGTGATAATATCAAATTTGCTGAT | 6049 |
| gb:MT093631 | Organism:Severe | TATCCAAACGCAAGCTTCGATAATTTAAGTTTGTATGTGATAATATCAAATTTGCTGAT | 6120 |
| gb:MT106053 | Organism:Severe | TATCCAAACGCAAGCTTCGATAATTTAAGTTTGTATGTGATAATATCAAATTTGCTGAT | 6082 |
| gb:MT019533 | Organism:Severe | TATCCAAACGCAAGCTTCGATAATTTAAGTTTGTATGTGATAATATCAAATTTGCTGAT | 6082 |
| gb:MT019531 | Organism:Severe | TATCCAAACGCAAGCTTCGATAATTTAAGTTTGTATGTGATAATATCAAATTTGCTGAT | 6082 |
| gb:MN996528 | Organism:Severe | TATCCAAACGCAAGCTTCGATAATTTAAGTTTGTATGTGATAATATCAAATTTGCTGAT | 6082 |
| gb:MN996530 | Organism:Severe | TATCCAAACGCAAGCTTCGATAATTTAAGTTTGTATGTGATAATATCAAATTTGCTGAT | 6068 |
| gb:MN908947 | Organism:Severe | TATCCAAACGCAAGCTTCGATAATTTAAGTTTGTATGTGATAATATCAAATTTGCTGAT | 6082 |
| gb:MT019532 | Organism:Severe | TATCCAAACGCAAGCTTCGATAATTTAAGTTTGTATGTGATAATATCAAATTTGCTGAT | 6082 |

\*\*\*\*\*

|             |                 |                                                              |      |
|-------------|-----------------|--------------------------------------------------------------|------|
| gb:MT020781 | Organism:Severe | GATTTAAACCAGTTAACTGGTTATAAGAAACCTGCTTCAAGAGAGCTTAAAGTTACATTT | 6130 |
| gb:MT007544 | Organism:Severe | GATTTAAACCAGTTAACTGGTTATAAGAAACCTGCTTCAAGAGAGCTTAAAGTTACATTT | 6142 |
| gb:MN994467 | Organism:Severe | GATTTAAACCAGTTAACTGGTTATAAGAAACCTGCTTCAAGAGAGCTTAAAGTTACATTT | 6142 |
| gb:MT044257 | Organism:Severe | GATTTAAACCAGTTAACTGGTTATAAGAAACCTGCTTCAAGAGAGCTTAAAGTTACATTT | 6142 |
| gb:MT106054 | Organism:Severe | GATTTAAACCAGTTAACTGGTTATAAGAAACCTGCTTCAAGAGAGCTTAAAGTTACATTT | 6142 |
| gb:MT049951 | Organism:Severe | GATTTAAACCAGTTAACTGGTTATAAGAAACCTGCTTCAAGAGAGCTTAAAGTTACATTT | 6142 |
| gb:MN975262 | Organism:Severe | GATTTAAACCAGTTAACTGGTTATAAGAAACCTGCTTCAAGAGAGCTTAAAGTTACATTT | 6142 |
| gb:MT106052 | Organism:Severe | GATTTAAACCAGTTAACTGGTTATAAGAAACCTGCTTCAAGAGAGCTTAAAGTTACATTT | 6142 |
| gb:LC522975 | Organism:Severe | GATTTAAACCAGTTAACTGGTTATAAGAAACCTGCTTCAAGAGAGCTTAAAGTTACATTT | 6139 |
| gb:LC522973 | Organism:Severe | GATTTAAACCAGTTAACTGGTTATAAGAAACCTGCTTCAAGAGAGCTTAAAGTTACATTT | 6139 |
| gb:LC522974 | Organism:Severe | GATTTAAACCAGTTAACTGGTTATAAGAAACCTGCTTCAAGAGAGCTTAAAGTTACATTT | 6139 |
| gb:MN985325 | Organism:Severe | GATTTAAACCAGTTAACTGGTTATAAGAAACCTGCTTCAAGAGAGCTTAAAGTTACATTT | 6142 |
| gb:MT020881 | Organism:Severe | GATTTAAACCAGTTAACTGGTTATAAGAAACCTGCTTCAAGAGAGCTTAAAGTTACATTT | 6142 |
| gb:MT020880 | Organism:Severe | GATTTAAACCAGTTAACTGGTTATAAGAAACCTGCTTCAAGAGAGCTTAAAGTTACATTT | 6142 |
| gb:MT066175 | Organism:Severe | GATTTAAACCAGTTAACTGGTTATAAGAAACCTGCTTCAAGAGAGCTTAAAGTTACATTT | 6142 |
| gb:MN997409 | Organism:Severe | GATTTAAACCAGTTAACTGGTTATAAGAAACCTGCTTCAAGAGAGCTTAAAGTTACATTT | 6142 |
| gb:MN938384 | Organism:Severe | GATTTAAACCAGTTAACTGGTTATAAGAAACCTGCTTCAAGAGAGCTTAAAGTTACATTT | 6110 |
| gb:MT044258 | Organism:Severe | GATTTAAACCAGTTAACTGGTTATAAGAAACCTGCTTCAAGAGAGCTTAAAGTTACATTT | 6118 |
| gb:MT039890 | Organism:Severe | GATTTAAACCAGTTAACTGGTTATAAGAAACCTGCTTCAAGAGAGCTTAAAGTTACATTT | 6142 |
| gb:MN988713 | Organism:Severe | GATTTAAACCAGTTAACTGGTTATAAGAAACCTGCTTCAAGAGAGCTTAAAGTTACATTT | 6142 |
| gb:LC521925 | Organism:Severe | GATTTAAACCAGTTAACTGGTTATAAGAAACCTGCTTCAAGAGAGCTTAAAGTTACATTT | 6115 |
| gb:MT093571 | Organism:Severe | GATTTAAACCAGTTAACTGGTTATAAGAAACCTGCTTCAAGAGAGCTTAAAGTTACATTT | 6142 |
| gb:MT039887 | Organism:Severe | GATTTAAACCAGTTAACTGGTTATAAGAAACCTGCTTCAAGAGAGCTTAAAGTTACATTT | 6142 |
| gb:MT019530 | Organism:Severe | GATTTAAACCAGTTAACTGGTTATAAGAAACCTGCTTCAAGAGAGCTTAAAGTTACATTT | 6142 |
| gb:MT039888 | Organism:Severe | GATTTAAACCAGTTAACTGGTTATAAGAAACCTGCTTCAAGAGAGCTTAAAGTTACATTT | 6142 |
| gb:LC522972 | Organism:Severe | GATTTAAACCAGTTAACTGGTTATAAGAAACCTGCTTCAAGAGAGCTTAAAGTTACATTT | 6139 |
| gb:MT027063 | Organism:Severe | GATTTAAACCAGTTAACTGGTTATAAGAAACCTGCTTCAAGAGAGCTTAAAGTTACATTT | 6142 |
| gb:MT027062 | Organism:Severe | GATTTAAACCAGTTAACTGGTTATAAGAAACCTGCTTCAAGAGAGCTTAAAGTTACATTT | 6142 |
| gb:MT019529 | Organism:Severe | GATTTAAACCAGTTAACTGGTTATAAGAAACCTGCTTCAAGAGAGCTTAAAGTTACATTT | 6142 |
| gb:MN996529 | Organism:Severe | GATTTAAACCAGTTAACTGGTTATAAGAAACCTGCTTCAAGAGAGCTTAAAGTTACATTT | 6130 |
| gb:MN996531 | Organism:Severe | GATTTAAACCAGTTAACTGGTTATAAGAAACCTGCTTCAAGAGAGCTTAAAGTTACATTT | 6129 |
| gb:MT066176 | Organism:Severe | GATTTAAACCAGTTAACTGGTTATAAGAAACCTGCTTCAAGAGAGCTTAAAGTTACATTT | 6142 |
| gb:MT027064 | Organism:Severe | GATTTAAACCAGTTAACTGGTTATAAGAAACCTGCTTCAAGAGAGCTTAAAGTTACATTT | 6142 |
| gb:MN994468 | Organism:Severe | GATTTAAACCAGTTAACTGGTTATAAGAAACCTGCTTCAAGAGAGCTTAAAGTTACATTT | 6142 |
| gb:MT072688 | Organism:Severe | GATTTAAACCAGTTAACTGGTTATAAGAAACCTGCTTCAAGAGAGCTTAAAGTTACATTT | 6127 |
| gb:MN996527 | Organism:Severe | GATTTAAACCAGTTAACTGGTTATAAGAAACCTGCTTCAAGAGAGCTTAAAGTTACATTT | 6109 |
| gb:MT093631 | Organism:Severe | GATTTAAACCAGTTAACTGGTTATAAGAAACCTGCTTCAAGAGAGCTTAAAGTTACATTT | 6180 |
| gb:MT106053 | Organism:Severe | GATTTAAACCAGTTAACTGGTTATAAGAAACCTGCTTCAAGAGAGCTTAAAGTTACATTT | 6142 |
| gb:MT019533 | Organism:Severe | GATTTAAACCAGTTAACTGGTTATAAGAAACCTGCTTCAAGAGAGCTTAAAGTTACATTT | 6142 |
| gb:MT019531 | Organism:Severe | GATTTAAACCAGTTAACTGGTTATAAGAAACCTGCTTCAAGAGAGCTTAAAGTTACATTT | 6142 |
| gb:MN996528 | Organism:Severe | GATTTAAACCAGTTAACTGGTTATAAGAAACCTGCTTCAAGAGAGCTTAAAGTTACATTT | 6142 |
| gb:MN996530 | Organism:Severe | GATTTAAACCAGTTAACTGGTTATAAGAAACCTGCTTCAAGAGAGCTTAAAGTTACATTT | 6128 |
| gb:MN908947 | Organism:Severe | GATTTAAACCAGTTAACTGGTTATAAGAAACCTGCTTCAAGAGAGCTTAAAGTTACATTT | 6142 |
| gb:MT019532 | Organism:Severe | GATTTAAACCAGTTAACTGGTTATAAGAAACCTGCTTCAAGAGAGCTTAAAGTTACATTT | 6142 |

\*\*\*\*\*

|             |                 |                                                              |      |
|-------------|-----------------|--------------------------------------------------------------|------|
| gb:MT020781 | Organism:Severe | TTCCCTGACTTAAATGGTGATGTGGTGGCTATTGATTATAAACACTACACACCCTCTTTT | 6190 |
| gb:MT007544 | Organism:Severe | TTCCCTGACTTAAATGGTGATGTGGTGGCTATTGATTATAAACACTACACACCCTCTTTT | 6202 |
| gb:MN994467 | Organism:Severe | TTCCCTGACTTAAATGGTGATGTGGTGGCTATTGATTATAAACACTACACACCCTCTTTT | 6202 |

|             |                 |                                                            |      |
|-------------|-----------------|------------------------------------------------------------|------|
| gb:MT044257 | Organism:Severe | TTCCCTGACTTAAATGGTGATGTGGTGGCTATTGATTATAAACTACACACCCTCTTTT | 6202 |
| gb:MT106054 | Organism:Severe | TTCCCTGACTTAAATGGTGATGTGGTGGCTATTGATTATAAACTACACACCCTCTTTT | 6202 |
| gb:MT049951 | Organism:Severe | TTCCCTGACTTAAATGGTGATGTGGTGGCTATTGATTATAAACTACACACCCTCTTTT | 6202 |
| gb:MN975262 | Organism:Severe | TTCCCTGACTTAAATGGTGATGTGGTGGCTATTGATTATAAACTACACACCCTCTTTT | 6202 |
| gb:MT106052 | Organism:Severe | TTCCCTGACTTAAATGGTGATGTGGTGGCTATTGATTATAAACTACACACCCTCTTTT | 6202 |
| gb:LC522975 | Organism:Severe | TTCCCTGACTTAAATGGTGATGTGGTGGCTATTGATTATAAACTACACACCCTCTTTT | 6199 |
| gb:LC522973 | Organism:Severe | TTCCCTGACTTAAATGGTGATGTGGTGGCTATTGATTATAAACTACACACCCTCTTTT | 6199 |
| gb:LC522974 | Organism:Severe | TTCCCTGACTTAAATGGTGATGTGGTGGCTATTGATTATAAACTACACACCCTCTTTT | 6199 |
| gb:MN985325 | Organism:Severe | TTCCCTGACTTAAATGGTGATGTGGTGGCTATTGATTATAAACTACACACCCTCTTTT | 6202 |
| gb:MT020881 | Organism:Severe | TTCCCTGACTTAAATGGTGATGTGGTGGCTATTGATTATAAACTACACACCCTCTTTT | 6202 |
| gb:MT020880 | Organism:Severe | TTCCCTGACTTAAATGGTGATGTGGTGGCTATTGATTATAAACTACACACCCTCTTTT | 6202 |
| gb:MT066175 | Organism:Severe | TTCCCTGACTTAAATGGTGATGTGGTGGCTATTGATTATAAACTACACACCCTCTTTT | 6202 |
| gb:MN997409 | Organism:Severe | TTCCCTGACTTAAATGGTGATGTGGTGGCTATTGATTATAAACTACACACCCTCTTTT | 6202 |
| gb:MN938384 | Organism:Severe | TTCCCTGACTTAAATGGTGATGTGGTGGCTATTGATTATAAACTACACACCCTCTTTT | 6170 |
| gb:MT044258 | Organism:Severe | TTCCCTGACTTAAATGGTGATGTGGTGGCTATTGATTATAAACTACACACCCTCTTTT | 6178 |
| gb:MT039890 | Organism:Severe | TTCCCTGACTTAAATGGTGATGTGGTGGCTATTGATTATAAACTACACACCCTCTTTT | 6202 |
| gb:MN988713 | Organism:Severe | TTCCCTGACTTAAATGGTGATGTGGTGGCTATTGATTATAAACTACACACCCTCTTTT | 6202 |
| gb:LC521925 | Organism:Severe | TTCCCTGACTTAAATGGTGATGTGGTGGCTATTGATTATAAACTACACACCCTCTTTT | 6175 |
| gb:MT093571 | Organism:Severe | TTCCCTGACTTAAATGGTGATGTGGTGGCTATTGATTATAAACTACACACCCTCTTTT | 6202 |
| gb:MT039887 | Organism:Severe | TTCCCTGACTTAAATGGTGATGTGGTGGCTATTGATTATAAACTACACACCCTCTTTT | 6202 |
| gb:MT019530 | Organism:Severe | TTCCCTGACTTAAATGGTGATGTGGTGGCTATTGATTATAAACTACACACCCTCTTTT | 6202 |
| gb:MT039888 | Organism:Severe | TTCCCTGACTTAAATGGTGATGTGGTGGCTATTGATTATAAACTACACACCCTCTTTT | 6202 |
| gb:LC522972 | Organism:Severe | TTCCCTGACTTAAATGGTGATGTGGTGGCTATTGATTATAAACTACACACCCTCTTTT | 6199 |
| gb:MT027063 | Organism:Severe | TTCCCTGACTTAAATGGTGATGTGGTGGCTATTGATTATAAACTACACACCCTCTTTT | 6202 |
| gb:MT027062 | Organism:Severe | TTCCCTGACTTAAATGGTGATGTGGTGGCTATTGATTATAAACTACACACCCTCTTTT | 6202 |
| gb:MT019529 | Organism:Severe | TTCCCTGACTTAAATGGTGATGTGGTGGCTATTGATTATAAACTACACACCCTCTTTT | 6202 |
| gb:MN996529 | Organism:Severe | TTCCCTGACTTAAATGGTGATGTGGTGGCTATTGATTATAAACTACACACCCTCTTTT | 6190 |
| gb:MN996531 | Organism:Severe | TTCCCTGACTTAAATGGTGATGTGGTGGCTATTGATTATAAACTACACACCCTCTTTT | 6189 |
| gb:MT066176 | Organism:Severe | TTCCCTGACTTAAATGGTGATGTGGTGGCTATTGATTATAAACTACACACCCTCTTTT | 6202 |
| gb:MT027064 | Organism:Severe | TTCCCTGACTTAAATGGTGATGTGGTGGCTATTGATTATAAACTACACACCCTCTTTT | 6202 |
| gb:MN994468 | Organism:Severe | TTCCCTGACTTAAATGGTGATGTGGTGGCTATTGATTATAAACTACACACCCTCTTTT | 6202 |
| gb:MT072688 | Organism:Severe | TTCCCTGACTTAAATGGTGATGTGGTGGCTATTGATTATAAACTACACACCCTCTTTT | 6187 |
| gb:MN996527 | Organism:Severe | TTCCCTGACTTAAATGGTGATGTGGTGGCTATTGATTATAAACTACACACCCTCTTTT | 6169 |
| gb:MT093631 | Organism:Severe | TTCCCTGACTTAAATGGTGATGTGGTGGCTATTGATTATAAACTACACACCCTCTTTT | 6240 |
| gb:MT106053 | Organism:Severe | TTCCCTGACTTAAATGGTGATGTGGTGGCTATTGATTATAAACTACACACCCTCTTTT | 6202 |
| gb:MT019533 | Organism:Severe | TTCCCTGACTTAAATGGTGATGTGGTGGCTATTGATTATAAACTACACACCCTCTTTT | 6202 |
| gb:MT019531 | Organism:Severe | TTCCCTGACTTAAATGGTGATGTGGTGGCTATTGATTATAAACTACACACCCTCTTTT | 6202 |
| gb:MN996528 | Organism:Severe | TTCCCTGACTTAAATGGTGATGTGGTGGCTATTGATTATAAACTACACACCCTCTTTT | 6202 |
| gb:MN996530 | Organism:Severe | TTCCCTGACTTAAATGGTGATGTGGTGGCTATTGATTATAAACTACACACCCTCTTTT | 6188 |
| gb:MN908947 | Organism:Severe | TTCCCTGACTTAAATGGTGATGTGGTGGCTATTGATTATAAACTACACACCCTCTTTT | 6202 |
| gb:MT019532 | Organism:Severe | TTCCCTGACTTAAATGGTGATGTGGTGGCTATTGATTATAAACTACACACCCTCTTTT | 6202 |

\*\*\*\*\*

|             |                 |                                                              |      |
|-------------|-----------------|--------------------------------------------------------------|------|
| gb:MT020781 | Organism:Severe | AAGAAAGGAGCTAAATTGTTACATAAACCTATTGTTTGGCATGTTAACAATGCAACTAAT | 6250 |
| gb:MT007544 | Organism:Severe | AAGAAAGGAGCTAAATTGTTACATAAACCTATTGTTTGGCATGTTAACAATGCAACTAAT | 6262 |
| gb:MN994467 | Organism:Severe | AAGAAAGGAGCTAAATTGTTACATAAACCTATTGTTTGGCATGTTAACAATGCAACTAAT | 6262 |
| gb:MT044257 | Organism:Severe | AAGAAAGGAGCTAAATTGTTACATAAACCTATTGTTTGGCATGTTAACAATGCAACTAAT | 6262 |
| gb:MT106054 | Organism:Severe | AAGAAAGGAGCTAAATTGTTACATAAACCTATTGTTTGGCATGTTAACAATGCAACTAAT | 6262 |
| gb:MT049951 | Organism:Severe | AAGAAAGGAGCTAAATTGTTACATAAACCTATTGTTTGGCATGTTAACAATGCAACTAAT | 6262 |
| gb:MN975262 | Organism:Severe | AAGAAAGGAGCTAAATTGTTACATAAACCTATTGTTTGGCATGTTAACAATGCAACTAAT | 6262 |
| gb:MT106052 | Organism:Severe | AAGAAAGGAGCTAAATTGTTACATAAACCTATTGTTTGGCATGTTAACAATGCAACTAAT | 6262 |
| gb:LC522975 | Organism:Severe | AAGAAAGGAGCTAAATTGTTACATAAACCTATTGTTTGGCATGTTAACAATGCAACTAAT | 6259 |
| gb:LC522973 | Organism:Severe | AAGAAAGGAGCTAAATTGTTACATAAACCTATTGTTTGGCATGTTAACAATGCAACTAAT | 6259 |
| gb:LC522974 | Organism:Severe | AAGAAAGGAGCTAAATTGTTACATAAACCTATTGTTTGGCATGTTAACAATGCAACTAAT | 6259 |
| gb:MN985325 | Organism:Severe | AAGAAAGGAGCTAAATTGTTACATAAACCTATTGTTTGGCATGTTAACAATGCAACTAAT | 6262 |
| gb:MT020881 | Organism:Severe | AAGAAAGGAGCTAAATTGTTACATAAACCTATTGTTTGGCATGTTAACAATGCAACTAAT | 6262 |
| gb:MT020880 | Organism:Severe | AAGAAAGGAGCTAAATTGTTACATAAACCTATTGTTTGGCATGTTAACAATGCAACTAAT | 6262 |
| gb:MT066175 | Organism:Severe | AAGAAAGGAGCTAAATTGTTACATAAACCTATTGTTTGGCATGTTAACAATGCAACTAAT | 6262 |
| gb:MN997409 | Organism:Severe | AAGAAAGGAGCTAAATTGTTACATAAACCTATTGTTTGGCATGTTAACAATGCAACTAAT | 6262 |
| gb:MN938384 | Organism:Severe | AAGAAAGGAGCTAAATTGTTACATAAACCTATTGTTTGGCATGTTAACAATGCAACTAAT | 6230 |
| gb:MT044258 | Organism:Severe | AAGAAAGGAGCTAAATTGTTACATAAACCTATTGTTTGGCATGTTAACAATGCAACTAAT | 6238 |
| gb:MT039890 | Organism:Severe | AAGAAAGGAGCTAAATTGTTACATAAACCTATTGTTTGGCATGTTAACAATGCAACTAAT | 6262 |
| gb:MN988713 | Organism:Severe | AAGAAAGGAGCTAAATTGTTACATAAACCTATTGTTTGGCATGTTAACAATGCAACTAAT | 6262 |
| gb:LC521925 | Organism:Severe | AAGAAAGGAGCTAAATTGTTACATAAACCTATTGTTTGGCATGTTAACAATGCAACTAAT | 6235 |
| gb:MT093571 | Organism:Severe | AAGAAAGGAGCTAAATTGTTACATAAACCTATTGTTTGGCATGTTAACAATGCAACTAAT | 6262 |



|             |                  |                                                                       |      |
|-------------|------------------|-----------------------------------------------------------------------|------|
| gb:MN996530 | Organism: Severe | AAAGCCACGTATAAACCAAATACCTGGTGTATACGTTGTCTTTGGAGCACAAAACAGTT           | 6308 |
| gb:MN908947 | Organism: Severe | AAAGCCACGTATAAACCAAATACCTGGTGTATACGTTGTCTTTGGAGCACAAAACAGTT           | 6322 |
| gb:MT019532 | Organism: Severe | AAAGCCACGTATAAACCAAATACCTGGTGTATACGTTGTCTTTGGAGCACAAAACAGTT<br>*****  | 6322 |
| gb:MT020781 | Organism: Severe | GAAACATCAAATTCGTTTGATGTACTGAAGTCAGAGGACGCGCAGGGAATGGATAATCTT          | 6370 |
| gb:MT007544 | Organism: Severe | GAAACATCAAATTCGTTTGATGTACTGAAGTCAGAGGACGCGCAGGGAATGGATAATCTT          | 6382 |
| gb:MN994467 | Organism: Severe | GAAACATCAAATTCGTTTGATGTACTGAAGTCAGAGGACGCGCAGGGAATGGATAATCTT          | 6382 |
| gb:MT044257 | Organism: Severe | GAAACATCAAATTCGTTTGATGTACTGAAGTCAGAGGACGCGCAGGGAATGGATAATCTT          | 6382 |
| gb:MT106054 | Organism: Severe | GAAACATCAAATTCGTTTGATGTACTGAAGTCAGAGGACGCGCAGGGAATGGATAATCTT          | 6382 |
| gb:MT049951 | Organism: Severe | GAAACATCAAATTCGTTTGATGTACTGAAGTCAGAGGACGCGCAGGGAATGGATAATCTT          | 6382 |
| gb:MN975262 | Organism: Severe | GAAACATCAAATTCGTTTGATGTACTGAAGTCAGAGGACGCGCAGGGAATGGATAATCTT          | 6382 |
| gb:MT106052 | Organism: Severe | GAAACATCAAATTCGTTTGATGTACTGAAGTCAGAGGACGCGCAGGGAATGGATAATCTT          | 6382 |
| gb:LC522975 | Organism: Severe | GAAACATCAAATTCGTTTGATGTACTGAAGTCAGAGGACGCGCAGGGAATGGATAATCTT          | 6379 |
| gb:LC522973 | Organism: Severe | GAAACATCAAATTCGTTTGATGTACTGAAGTCAGAGGACGCGCAGGGAATGGATAATCTT          | 6379 |
| gb:LC522974 | Organism: Severe | GAAACATCAAATTCGTTTGATGTACTGAAGTCAGAGGACGCGCAGGGAATGGATAATCTT          | 6379 |
| gb:MN985325 | Organism: Severe | GAAACATCAAATTCGTTTGATGTACTGAAGTCAGAGGACGCGCAGGGAATGGATAATCTT          | 6382 |
| gb:MT020881 | Organism: Severe | GAAACATCAAATTCGTTTGATGTACTGAAGTCAGAGGACGCGCAGGGAATGGATAATCTT          | 6382 |
| gb:MT020880 | Organism: Severe | GAAACATCAAATTCGTTTGATGTACTGAAGTCAGAGGACGCGCAGGGAATGGATAATCTT          | 6382 |
| gb:MT066175 | Organism: Severe | GAAACATCAAATTCGTTTGATGTACTGAAGTCAGAGGACGCGCAGGGAATGGATAATCTT          | 6382 |
| gb:MN997409 | Organism: Severe | GAAACATCAAATTCGTTTGATGTACTGAAGTCAGAGGACGCGCAGGGAATGGATAATCTT          | 6382 |
| gb:MN938384 | Organism: Severe | GAAACATCAAATTCGTTTGATGTACTGAAGTCAGAGGACGCGCAGGGAATGGATAATCTT          | 6350 |
| gb:MT044258 | Organism: Severe | GAAACATCAAATTCGTTTGATGTACTGAAGTCAGAGGACGCGCAGGGAATGGATAATCTT          | 6358 |
| gb:MT039890 | Organism: Severe | GAAACATCAAATTCGTTTGATGTACTGAAGTCAGAGGACGCGCAGGGAATGGATAATCTT          | 6382 |
| gb:MN988713 | Organism: Severe | GAAACATCAAATTCGTTTGATGTACTGAAGTCAGAGGACGCGCAGGGAATGGATAATCTT          | 6382 |
| gb:LC521925 | Organism: Severe | GAAACATCAAATTCGTTTGATGTACTGAAGTCAGAGGACGCGCAGGGAATGGATAATCTT          | 6355 |
| gb:MT093571 | Organism: Severe | GAAACATCAAATTCGTTTGATGTACTGAAGTCAGAGGACGCGCAGGGAATGGATAATCTT          | 6382 |
| gb:MT039887 | Organism: Severe | GAAACATCAAATTCGTTTGATGTACTGAAGTCAGAGGACGCGCAGGGAATGGATAATCTT          | 6382 |
| gb:MT019530 | Organism: Severe | GAAACATCAAATTCGTTTGATGTACTGAAGTCAGAGGACGCGCAGGGAATGGATAATCTT          | 6382 |
| gb:MT039888 | Organism: Severe | GAAACATCAAATTCGTTTGATGTACTGAAGTCAGAGGACGCGCAGGGAATGGATAATCTT          | 6382 |
| gb:LC522972 | Organism: Severe | GAAACATCAAATTCGTTTGATGTACTGAAGTCAGAGGACGCGCAGGGAATGGATAATCTT          | 6379 |
| gb:MT027063 | Organism: Severe | GAAACATCAAATTCGTTTGATGTACTGAAGTCAGAGGACGCGCAGGGAATGGATAATCTT          | 6382 |
| gb:MT027062 | Organism: Severe | GAAACATCAAATTCGTTTGATGTACTGAAGTCAGAGGACGCGCAGGGAATGGATAATCTT          | 6382 |
| gb:MT019529 | Organism: Severe | GAAACATCAAATTCGTTTGATGTACTGAAGTCAGAGGACGCGCAGGGAATGGATAATCTT          | 6382 |
| gb:MN996529 | Organism: Severe | GAAACATCAAATTCGTTTGATGTACTGAAGTCAGAGGACGCGCAGGGAATGGATAATCTT          | 6370 |
| gb:MN996531 | Organism: Severe | GAAACATCAAATTCGTTTGATGTACTGAAGTCAGAGGACGCGCAGGGAATGGATAATCTT          | 6369 |
| gb:MT066176 | Organism: Severe | GAAACATCAAATTCGTTTGATGTACTGAAGTCAGAGGACGCGCAGGGAATGGATAATCTT          | 6382 |
| gb:MT027064 | Organism: Severe | GAAACATCAAATTCGTTTGATGTACTGAAGTCAGAGGACGCGCAGGGAATGGATAATCTT          | 6382 |
| gb:MN994468 | Organism: Severe | GAAACATCAAATTCGTTTGATGTACTGAAGTCAGAGGACGCGCAGGGAATGGATAATCTT          | 6382 |
| gb:MT072688 | Organism: Severe | GAAACATCAAATTCGTTTGATGTACTGAAGTCAGAGGACGCGCAGGGAATGGATAATCTT          | 6367 |
| gb:MN996527 | Organism: Severe | GAAACATCAAATTCGTTTGATGTACTGAAGTCAGAGGACGCGCAGGGAATGGATAATCTT          | 6349 |
| gb:MT093631 | Organism: Severe | GAAACATCAAATTCGTTTGATGTACTGAAGTCAGAGGACGCGCAGGGAATGGATAATCTT          | 6420 |
| gb:MT106053 | Organism: Severe | GAAACATCAAATTCGTTTGATGTACTGAAGTCAGAGGACGCGCAGGGAATGGATAATCTT          | 6382 |
| gb:MT019533 | Organism: Severe | GAAACATCAAATTCGTTTGATGTACTGAAGTCAGAGGACGCGCAGGGAATGGATAATCTT          | 6382 |
| gb:MT019531 | Organism: Severe | GAAACATCAAATTCGTTTGATGTACTGAAGTCAGAGGACGCGCAGGGAATGGATAATCTT          | 6382 |
| gb:MN996528 | Organism: Severe | GAAACATCAAATTCGTTTGATGTACTGAAGTCAGAGGACGCGCAGGGAATGGATAATCTT          | 6382 |
| gb:MN996530 | Organism: Severe | GAAACATCAAATTCGTTTGATGTACTGAAGTCAGAGGACGCGCAGGGAATGGATAATCTT          | 6368 |
| gb:MN908947 | Organism: Severe | GAAACATCAAATTCGTTTGATGTACTGAAGTCAGAGGACGCGCAGGGAATGGATAATCTT          | 6382 |
| gb:MT019532 | Organism: Severe | GAAACATCAAATTCGTTTGATGTACTGAAGTCAGAGGACGCGCAGGGAATGGATAATCTT<br>***** | 6382 |

|             |                  |                                                              |      |
|-------------|------------------|--------------------------------------------------------------|------|
| gb:MT020781 | Organism: Severe | GCCTGCGAAGATCTAAAACAGTCTCTGAAGAAGTAGTGGAAAAATCCTACCATACAGAAA | 6430 |
| gb:MT007544 | Organism: Severe | GCCTGCGAAGATCTAAAACAGTCTCTGAAGAAGTAGTGGAAAAATCCTACCATACAGAAA | 6442 |
| gb:MN994467 | Organism: Severe | GCCTGCGAAGATCTAAAACAGTCTCTGAAGAAGTAGTGGAAAAATCCTACCATACAGAAA | 6442 |
| gb:MT044257 | Organism: Severe | GCCTGCGAAGATCTAAAACAGTCTCTGAAGAAGTAGTGGAAAAATCCTACCATACAGAAA | 6442 |
| gb:MT106054 | Organism: Severe | GCCTGCGAAGATCTAAAACAGTCTCTGAAGAAGTAGTGGAAAAATCCTACCATACAGAAA | 6442 |
| gb:MT049951 | Organism: Severe | GCCTGCGAAGATCTAAAACAGTCTCTGAAGAAGTAGTGGAAAAATCCTACCATACAGAAA | 6442 |
| gb:MN975262 | Organism: Severe | GCCTGCGAAGATCTAAAACAGTCTCTGAAGAAGTAGTGGAAAAATCCTACCATACAGAAA | 6442 |
| gb:MT106052 | Organism: Severe | GCCTGCGAAGATCTAAAACAGTCTCTGAAGAAGTAGTGGAAAAATCCTACCATACAGAAA | 6442 |
| gb:LC522975 | Organism: Severe | GCCTGCGAAGATCTAAAACAGTCTCTGAAGAAGTAGTGGAAAAATCCTACCATACAGAAA | 6439 |
| gb:LC522973 | Organism: Severe | GCCTGCGAAGATCTAAAACAGTCTCTGAAGAAGTAGTGGAAAAATCCTACCATACAGAAA | 6439 |
| gb:LC522974 | Organism: Severe | GCCTGCGAAGATCTAAAACAGTCTCTGAAGAAGTAGTGGAAAAATCCTACCATACAGAAA | 6439 |
| gb:MN985325 | Organism: Severe | GCCTGCGAAGATCTAAAACAGTCTCTGAAGAAGTAGTGGAAAAATCCTACCATACAGAAA | 6442 |
| gb:MT020881 | Organism: Severe | GCCTGCGAAGATCTAAAACAGTCTCTGAAGAAGTAGTGGAAAAATCCTACCATACAGAAA | 6442 |
| gb:MT020880 | Organism: Severe | GCCTGCGAAGATCTAAAACAGTCTCTGAAGAAGTAGTGGAAAAATCCTACCATACAGAAA | 6442 |

|             |                 |                                                                       |      |
|-------------|-----------------|-----------------------------------------------------------------------|------|
| gb:MT066175 | Organism:Severe | GCCTGCGAAGATCTAAAACCAGTCTCTGAAGAAGTAGTGGAAAATCCTACCATACAGAAA          | 6442 |
| gb:MN997409 | Organism:Severe | GCCTGCGAAGATCTAAAACCAGTCTCTGAAGAAGTAGTGGAAAATCCTACCATACAGAAA          | 6442 |
| gb:MN938384 | Organism:Severe | GCCTGCGAAGATCTAAAACCAGTCTCTGAAGAAGTAGTGGAAAATCCTACCATACAGAAA          | 6410 |
| gb:MT044258 | Organism:Severe | GCCTGCGAAGATCTAAAACCAGTCTCTGAAGAAGTAGTGGAAAATCCTACCATACAGAAA          | 6418 |
| gb:MT039890 | Organism:Severe | GCCTGCGAAGATCTAAAACCAGTCTCTGAAGAAGTAGTGGAAAATCCTACCATACAGAAA          | 6442 |
| gb:MN988713 | Organism:Severe | GCCTGCGAAGATCTAAAACCAGTCTCTGAAGAAGTAGTGGAAAATCCTACCATACAGAAA          | 6442 |
| gb:LC521925 | Organism:Severe | GCCTGCGAAGATCTAAAACCAGTCTCTGAAGAAGTAGTGGAAAATCCTACCATACAGAAA          | 6415 |
| gb:MT093571 | Organism:Severe | GCCTGCGAAGATCTAAAACCAGTCTCTGAAGAAGTAGTGGAAAATCCTACCATACAGAAA          | 6442 |
| gb:MT039887 | Organism:Severe | GCCTGCGAAGATCTAAAACCAGTCTCTGAAGAAGTAGTGGAAAATCCTACCATACAGAAA          | 6442 |
| gb:MT019530 | Organism:Severe | GCCTGCGAAGATCTAAAACCAGTCTCTGAAGAAGTAGTGGAAAATCCTACCATACAGAAA          | 6442 |
| gb:MT039888 | Organism:Severe | GCCTGCGAAGATCTAAAACCAGTCTCTGAAGAAGTAGTGGAAAATCCTACCATACAGAAA          | 6442 |
| gb:LC522972 | Organism:Severe | GCCTGCGAAGATCTAAAACCAGTCTCTGAAGAAGTAGTGGAAAATCCTACCATACAGAAA          | 6439 |
| gb:MT027063 | Organism:Severe | GCCTGCGAAGATCTAAAACCAGTCTCTGAAGAAGTAGTGGAAAATCCTACCATACAGAAA          | 6442 |
| gb:MT027062 | Organism:Severe | GCCTGCGAAGATCTAAAACCAGTCTCTGAAGAAGTAGTGGAAAATCCTACCATACAGAAA          | 6442 |
| gb:MT019529 | Organism:Severe | GCCTGCGAAGATCTAAAACCAGTCTCTGAAGAAGTAGTGGAAAATCCTACCATACAGAAA          | 6442 |
| gb:MN996529 | Organism:Severe | GCCTGCGAAGATCTAAAACCAGTCTCTGAAGAAGTAGTGGAAAATCCTACCATACAGAAA          | 6430 |
| gb:MN996531 | Organism:Severe | GCCTGCGAAGATCTAAAACCAGTCTCTGAAGAAGTAGTGGAAAATCCTACCATACAGAAA          | 6429 |
| gb:MT066176 | Organism:Severe | GCCTGCGAAGATCTAAAACCAGTCTCTGAAGAAGTAGTGGAAAATCCTACCATACAGAAA          | 6442 |
| gb:MT027064 | Organism:Severe | GCCTGCGAAGATCTAAAACCAGTCTCTGAAGAAGTAGTGGAAAATCCTACCATACAGAAA          | 6442 |
| gb:MN994468 | Organism:Severe | GCCTGCGAAGATCTAAAACCAGTCTCTGAAGAAGTAGTGGAAAATCCTACCATACAGAAA          | 6442 |
| gb:MT072688 | Organism:Severe | GCCTGCGAAGATCTAAAACCAGTCTCTGAAGAAGTAGTGGAAAATCCTACCATACAGAAA          | 6427 |
| gb:MN996527 | Organism:Severe | GCCTGCGAAGATCTAAAACCAGTCTCTGAAGAAGTAGTGGAAAATCCTACCATACAGAAA          | 6409 |
| gb:MT093631 | Organism:Severe | GCCTGCGAAGATCTAAAACCAGTCTCTGAAGAAGTAGTGGAAAATCCTACCATACAGAAA          | 6480 |
| gb:MT106053 | Organism:Severe | GCCTGCGAAGATCTAAAACCAGTCTCTGAAGAAGTAGTGGAAAATCCTACCATACAGAAA          | 6442 |
| gb:MT019533 | Organism:Severe | GCCTGCGAAGATCTAAAACCAGTCTCTGAAGAAGTAGTGGAAAATCCTACCATACAGAAA          | 6442 |
| gb:MT019531 | Organism:Severe | GCCTGCGAAGATCTAAAACCAGTCTCTGAAGAAGTAGTGGAAAATCCTACCATACAGAAA          | 6442 |
| gb:MN996528 | Organism:Severe | GCCTGCGAAGATCTAAAACCAGTCTCTGAAGAAGTAGTGGAAAATCCTACCATACAGAAA          | 6442 |
| gb:MN996530 | Organism:Severe | GCCTGCGAAGATCTAAAACCAGTCTCTGAAGAAGTAGTGGAAAATCCTACCATACAGAAA          | 6428 |
| gb:MN908947 | Organism:Severe | GCCTGCGAAGATCTAAAACCAGTCTCTGAAGAAGTAGTGGAAAATCCTACCATACAGAAA          | 6442 |
| gb:MT019532 | Organism:Severe | GCCTGCGAAGATCTAAAACCAGTCTCTGAAGAAGTAGTGGAAAATCCTACCATACAGAAA<br>***** | 6442 |

|             |                 |                                                                |      |
|-------------|-----------------|----------------------------------------------------------------|------|
| gb:MT020781 | Organism:Severe | GACGTTCTTGAGTGTAAATGTGAAAACCTACCGAAGTTGTAGGAGACATTATACTTAAACCA | 6490 |
| gb:MT007544 | Organism:Severe | GACGTTCTTGAGTGTAAATGTGAAAACCTACCGAAGTTGTAGGAGACATTATACTTAAACCA | 6502 |
| gb:MN994467 | Organism:Severe | GACGTTCTTGAGTGTAAATGTGAAAACCTACCGAAGTTGTAGGAGACATTATACTTAAACCA | 6502 |
| gb:MT044257 | Organism:Severe | GACGTTCTTGAGTGTAAATGTGAAAACCTACCGAAGTTGTAGGAGACATTATACTTAAACCA | 6502 |
| gb:MT106054 | Organism:Severe | GACGTTCTTGAGTGTAAATGTGAAAACCTACCGAAGTTGTAGGAGACATTATACTTAAACCA | 6502 |
| gb:MT049951 | Organism:Severe | GACGTTCTTGAGTGTAAATGTGAAAACCTACCGAAGTTGTAGGAGACATTATACTTAAACCA | 6502 |
| gb:MN975262 | Organism:Severe | GACGTTCTTGAGTGTAAATGTGAAAACCTACCGAAGTTGTAGGAGACATTATACTTAAACCA | 6502 |
| gb:MT106052 | Organism:Severe | GACGTTCTTGAGTGTAAATGTGAAAACCTACCGAAGTTGTAGGAGACATTATACTTAAACCA | 6502 |
| gb:LC522975 | Organism:Severe | GACGTTCTTGAGTGTAAATGTGAAAACCTACCGAAGTTGTAGGAGACATTATACTTAAACCA | 6499 |
| gb:LC522973 | Organism:Severe | GACGTTCTTGAGTGTAAATGTGAAAACCTACCGAAGTTGTAGGAGACATTATACTTAAACCA | 6499 |
| gb:LC522974 | Organism:Severe | GACGTTCTTGAGTGTAAATGTGAAAACCTACCGAAGTTGTAGGAGACATTATACTTAAACCA | 6499 |
| gb:MN985325 | Organism:Severe | GACGTTCTTGAGTGTAAATGTGAAAACCTACCGAAGTTGTAGGAGACATTATACTTAAACCA | 6502 |
| gb:MT020881 | Organism:Severe | GACGTTCTTGAGTGTAAATGTGAAAACCTACCGAAGTTGTAGGAGACATTATACTTAAACCA | 6502 |
| gb:MT020880 | Organism:Severe | GACGTTCTTGAGTGTAAATGTGAAAACCTACCGAAGTTGTAGGAGACATTATACTTAAACCA | 6502 |
| gb:MT066175 | Organism:Severe | GACGTTCTTGAGTGTAAATGTGAAAACCTACCGAAGTTGTAGGAGACATTATACTTAAACCA | 6502 |
| gb:MN997409 | Organism:Severe | GACGTTCTTGAGTGTAAATGTGAAAACCTACCGAAGTTGTAGGAGACATTATACTTAAACCA | 6502 |
| gb:MN938384 | Organism:Severe | GACGTTCTTGAGTGTAAATGTGAAAACCTACCGAAGTTGTAGGAGACATTATACTTAAACCA | 6470 |
| gb:MT044258 | Organism:Severe | GACGTTCTTGAGTGTAAATGTGAAAACCTACCGAAGTTGTAGGAGACATTATACTTAAACCA | 6478 |
| gb:MT039890 | Organism:Severe | GACGTTCTTGAGTGTAAATGTGAAAACCTACCGAAGTTGTAGGAGACATTATACTTAAACCA | 6502 |
| gb:MN988713 | Organism:Severe | GACGTTCTTGAGTGTAAATGTGAAAACCTACCGAAGTTGTAGGAGACATTATACTTAAACCA | 6502 |
| gb:LC521925 | Organism:Severe | GACGTTCTTGAGTGTAAATGTGAAAACCTACCGAAGTTGTAGGAGACATTATACTTAAACCA | 6475 |
| gb:MT093571 | Organism:Severe | GACGTTCTTGAGTGTAAATGTGAAAACCTACCGAAGTTGTAGGAGACATTATACTTAAACCA | 6502 |
| gb:MT039887 | Organism:Severe | GACGTTCTTGAGTGTAAATGTGAAAACCTACCGAAGTTGTAGGAGACATTATACTTAAACCA | 6502 |
| gb:MT019530 | Organism:Severe | GACGTTCTTGAGTGTAAATGTGAAAACCTACCGAAGTTGTAGGAGACATTATACTTAAACCA | 6502 |
| gb:MT039888 | Organism:Severe | GACGTTCTTGAGTGTAAATGTGAAAACCTACCGAAGTTGTAGGAGACATTATACTTAAACCA | 6502 |
| gb:LC522972 | Organism:Severe | GACGTTCTTGAGTGTAAATGTGAAAACCTACCGAAGTTGTAGGAGACATTATACTTAAACCA | 6499 |
| gb:MT027063 | Organism:Severe | GACGTTCTTGAGTGTAAATGTGAAAACCTACCGAAGTTGTAGGAGACATTATACTTAAACCA | 6502 |
| gb:MT027062 | Organism:Severe | GACGTTCTTGAGTGTAAATGTGAAAACCTACCGAAGTTGTAGGAGACATTATACTTAAACCA | 6502 |
| gb:MT019529 | Organism:Severe | GACGTTCTTGAGTGTAAATGTGAAAACCTACCGAAGTTGTAGGAGACATTATACTTAAACCA | 6502 |
| gb:MN996529 | Organism:Severe | GACGTTCTTGAGTGTAAATGTGAAAACCTACCGAAGTTGTAGGAGACATTATACTTAAACCA | 6490 |
| gb:MN996531 | Organism:Severe | GACGTTCTTGAGTGTAAATGTGAAAACCTACCGAAGTTGTAGGAGACATTATACTTAAACCA | 6489 |
| gb:MT066176 | Organism:Severe | GACGTTCTTGAGTGTAAATGTGAAAACCTACCGAAGTTGTAGGAGACATTATACTTAAACCA | 6502 |
| gb:MT027064 | Organism:Severe | GACGTTCTTGAGTGTAAATGTGAAAACCTACCGAAGTTGTAGGAGACATTATACTTAAACCA | 6502 |

|             |                 |                                                              |      |
|-------------|-----------------|--------------------------------------------------------------|------|
| gb:MN994468 | Organism:Severe | GACGTTCTTGAGTGTAAATGTGAAAACACCGAAGTTGTAGGAGACATTATACTTAAACCA | 6502 |
| gb:MT072688 | Organism:Severe | GACGTTCTTGAGTGTAAATGTGAAAACACCGAAGTTGTAGGAGACATTATACTTAAACCA | 6487 |
| gb:MN996527 | Organism:Severe | GACGTTCTTGAGTGTAAATGTGAAAACACCGAAGTTGTAGGAGACATTATACTTAAACCA | 6469 |
| gb:MT093631 | Organism:Severe | GACGTTCTTGAGTGTAAATGTGAAAACACCGAAGTTGTAGGAGACATTATACTTAAACCA | 6540 |
| gb:MT106053 | Organism:Severe | GACGTTCTTGAGTGTAAATGTGAAAACACCGAAGTTGTAGGAGACATTATACTTAAACCA | 6502 |
| gb:MT019533 | Organism:Severe | GACGTTCTTGAGTGTAAATGTGAAAACACCGAAGTTGTAGGAGACATTATACTTAAACCA | 6502 |
| gb:MT019531 | Organism:Severe | GACGTTCTTGAGTGTAAATGTGAAAACACCGAAGTTGTAGGAGACATTATACTTAAACCA | 6502 |
| gb:MN996528 | Organism:Severe | GACGTTCTTGAGTGTAAATGTGAAAACACCGAAGTTGTAGGAGACATTATACTTAAACCA | 6502 |
| gb:MN996530 | Organism:Severe | GACGTTCTTGAGTGTAAATGTGAAAACACCGAAGTTGTAGGAGACATTATACTTAAACCA | 6488 |
| gb:MN908947 | Organism:Severe | GACGTTCTTGAGTGTAAATGTGAAAACACCGAAGTTGTAGGAGACATTATACTTAAACCA | 6502 |
| gb:MT019532 | Organism:Severe | GACGTTCTTGAGTGTAAATGTGAAAACACCGAAGTTGTAGGAGACATTATACTTAAACCA | 6502 |

\*\*\*\*\*

|             |                 |                                                              |      |
|-------------|-----------------|--------------------------------------------------------------|------|
| gb:MT020781 | Organism:Severe | GCAAATAATAGTTTAAAAATTACAGAAGAGGTTGGCCACACAGATCTAATGGCTGCTTAT | 6550 |
| gb:MT007544 | Organism:Severe | GCAAATAATAGTTTAAAAATTACAGAAGAGGTTGGCCACACAGATCTAATGGCTGCTTAT | 6562 |
| gb:MN994467 | Organism:Severe | GCAAATAATAGTTTAAAAATTACAGAAGAGGTTGGCCACACAGATCTAATGGCTGCTTAT | 6562 |
| gb:MT044257 | Organism:Severe | GCAAATAATAGTTTAAAAATTACAGAAGAGGTTGGCCACACAGATCTAATGGCTGCTTAT | 6562 |
| gb:MT106054 | Organism:Severe | GCAAATAATAGTTTAAAAATTACAGAAGAGGTTGGCCACACAGATCTAATGGCTGCTTAT | 6562 |
| gb:MT049951 | Organism:Severe | GCAAATAATAGTTTAAAAATTACAGAAGAGGTTGGCCACACAGATCTAATGGCTGCTTAT | 6562 |
| gb:MN975262 | Organism:Severe | GCAAATAATAGTTTAAAAATTACAGAAGAGGTTGGCCACACAGATCTAATGGCTGCTTAT | 6562 |
| gb:MT106052 | Organism:Severe | GCAAATAATAGTTTAAAAATTACAGAAGAGGTTGGCCACACAGATCTAATGGCTGCTTAT | 6562 |
| gb:LC522975 | Organism:Severe | GCAAATAATAGTTTAAAAATTACAGAAGAGGTTGGCCACACAGATCTAATGGCTGCTTAT | 6559 |
| gb:LC522973 | Organism:Severe | GCAAATAATAGTTTAAAAATTACAGAAGAGGTTGGCCACACAGATCTAATGGCTGCTTAT | 6559 |
| gb:LC522974 | Organism:Severe | GCAAATAATAGTTTAAAAATTACAGAAGAGGTTGGCCACACAGATCTAATGGCTGCTTAT | 6559 |
| gb:MN985325 | Organism:Severe | GCAAATAATAGTTTAAAAATTACAGAAGAGGTTGGCCACACAGATCTAATGGCTGCTTAT | 6562 |
| gb:MT020881 | Organism:Severe | GCAAATAATAGTTTAAAAATTACAGAAGAGGTTGGCCACACAGATCTAATGGCTGCTTAT | 6562 |
| gb:MT020880 | Organism:Severe | GCAAATAATAGTTTAAAAATTACAGAAGAGGTTGGCCACACAGATCTAATGGCTGCTTAT | 6562 |
| gb:MT066175 | Organism:Severe | GCAAATAATAGTTTAAAAATTACAGAAGAGGTTGGCCACACAGATCTAATGGCTGCTTAT | 6562 |
| gb:MN997409 | Organism:Severe | GCAAATAATAGTTTAAAAATTACAGAAGAGGTTGGCCACACAGATCTAATGGCTGCTTAT | 6562 |
| gb:MN938384 | Organism:Severe | GCAAATAATAGTTTAAAAATTACAGAAGAGGTTGGCCACACAGATCTAATGGCTGCTTAT | 6530 |
| gb:MT044258 | Organism:Severe | GCAAATAATAGTTTAAAAATTACAGAAGAGGTTGGCCACACAGATCTAATGGCTGCTTAT | 6538 |
| gb:MT039890 | Organism:Severe | GCAAATAATAGTTTAAAAATTACAGAAGAGGTTGGCCACACAGATCTAATGGCTGCTTAT | 6562 |
| gb:MN988713 | Organism:Severe | GCAAATAATAGTTTAAAAATTACAGAAGAGGTTGGCCACACAGATCTAATGGCTGCTTAT | 6562 |
| gb:LC521925 | Organism:Severe | GCAAATAATAGTTTAAAAATTACAGAAGAGGTTGGCCACACAGATCTAATGGCTGCTTAT | 6535 |
| gb:MT093571 | Organism:Severe | GCAAATAATAGTTTAAAAATTACAGAAGAGGTTGGCCACACAGATCTAATGGCTGCTTAT | 6562 |
| gb:MT039887 | Organism:Severe | GCAAATAATAGTTTAAAAATTACAGAAGAGGTTGGCCACACAGATCTAATGGCTGCTTAT | 6562 |
| gb:MT019530 | Organism:Severe | GCAAATAATAGTTTAAAAATTACAGAAGAGGTTGGCCACACAGATCTAATGGCTGCTTAT | 6562 |
| gb:MT039888 | Organism:Severe | GCAAATAATAGTTTAAAAATTACAGAAGAGGTTGGCCACACAGATCTAATGGCTGCTTAT | 6562 |
| gb:LC522972 | Organism:Severe | GCAAATAATAGTTTAAAAATTACAGAAGAGGTTGGCCACACAGATCTAATGGCTGCTTAT | 6559 |
| gb:MT027063 | Organism:Severe | GCAAATAATAGTTTAAAAATTACAGAAGAGGTTGGCCACACAGATCTAATGGCTGCTTAT | 6562 |
| gb:MT027062 | Organism:Severe | GCAAATAATAGTTTAAAAATTACAGAAGAGGTTGGCCACACAGATCTAATGGCTGCTTAT | 6562 |
| gb:MT019529 | Organism:Severe | GCAAATAATAGTTTAAAAATTACAGAAGAGGTTGGCCACACAGATCTAATGGCTGCTTAT | 6562 |
| gb:MN996529 | Organism:Severe | GCAAATAATAGTTTAAAAATTACAGAAGAGGTTGGCCACACAGATCTAATGGCTGCTTAT | 6550 |
| gb:MN996531 | Organism:Severe | GCAAATAATAGTTTAAAAATTACAGAAGAGGTTGGCCACACAGATCTAATGGCTGCTTAT | 6549 |
| gb:MT066176 | Organism:Severe | GCAAATAATAGTTTAAAAATTACAGAAGAGGTTGGCCACACAGATCTAATGGCTGCTTAT | 6562 |
| gb:MT027064 | Organism:Severe | GCAAATAATAGTTTAAAAATTACAGAAGAGGTTGGCCACACAGATCTAATGGCTGCTTAT | 6562 |
| gb:MN994468 | Organism:Severe | GCAAATAATAGTTTAAAAATTACAGAAGAGGTTGGCCACACAGATCTAATGGCTGCTTAT | 6562 |
| gb:MT072688 | Organism:Severe | GCAAATAATAGTTTAAAAATTACAGAAGAGGTTGGCCACACAGATCTAATGGCTGCTTAT | 6547 |
| gb:MN996527 | Organism:Severe | GCAAATAATAGTTTAAAAATTACAGAAGAGGTTGGCCACACAGATCTAATGGCTGCTTAT | 6529 |
| gb:MT093631 | Organism:Severe | GCAAATAATAGTTTAAAAATTACAGAAGAGGTTGGCCACACAGATCTAATGGCTGCTTAT | 6600 |
| gb:MT106053 | Organism:Severe | GCAAATAATAGTTTAAAAATTACAGAAGAGGTTGGCCACACAGATCTAATGGCTGCTTAT | 6562 |
| gb:MT019533 | Organism:Severe | GCAAATAATAGTTTAAAAATTACAGAAGAGGTTGGCCACACAGATCTAATGGCTGCTTAT | 6562 |
| gb:MT019531 | Organism:Severe | GCAAATAATAGTTTAAAAATTACAGAAGAGGTTGGCCACACAGATCTAATGGCTGCTTAT | 6562 |
| gb:MN996528 | Organism:Severe | GCAAATAATAGTTTAAAAATTACAGAAGAGGTTGGCCACACAGATCTAATGGCTGCTTAT | 6562 |
| gb:MN996530 | Organism:Severe | GCAAATAATAGTTTAAAAATTACAGAAGAGGTTGGCCACACAGATCTAATGGCTGCTTAT | 6548 |
| gb:MN908947 | Organism:Severe | GCAAATAATAGTTTAAAAATTACAGAAGAGGTTGGCCACACAGATCTAATGGCTGCTTAT | 6562 |
| gb:MT019532 | Organism:Severe | GCAAATAATAGTTTAAAAATTACAGAAGAGGTTGGCCACACAGATCTAATGGCTGCTTAT | 6562 |

\*\*\*\*\*

|             |                 |                                                              |      |
|-------------|-----------------|--------------------------------------------------------------|------|
| gb:MT020781 | Organism:Severe | GTAGACAATTCTAGTCTTACTATTAAGAAACCTAATGAATTATCTAGAGTATTAGGTTTG | 6610 |
| gb:MT007544 | Organism:Severe | GTAGACAATTCTAGTCTTACTATTAAGAAACCTAATGAATTATCTAGAGTATTAGGTTTG | 6622 |
| gb:MN994467 | Organism:Severe | GTAGACAATTCTAGTCTTACTATTAAGAAACCTAATGAATTATCTAGAGTATTAGGTTTG | 6622 |
| gb:MT044257 | Organism:Severe | GTAGACAATTCTAGTCTTACTATTAAGAAACCTAATGAATTATCTAGAGTATTAGGTTTG | 6622 |
| gb:MT106054 | Organism:Severe | GTAGACAATTCTAGTCTTACTATTAAGAAACCTAATGAATTATCTAGAGTATTAGGTTTG | 6622 |
| gb:MT049951 | Organism:Severe | GTAGACAATTCTAGTCTTACTATTAAGAAACCTAATGAATTATCTAGAGTATTAGGTTTG | 6622 |





|             |                 |                                                            |      |
|-------------|-----------------|------------------------------------------------------------|------|
| gb:LC522972 | Organism:Severe | AAAACCCTTGCTACTCATGGTTAGCTGCTGTTAATAGTGTCCCTGGGATACTATAGCT | 6679 |
| gb:MT027063 | Organism:Severe | AAAACCCTTGCTACTCATGGTTAGCTGCTGTTAATAGTGTCCCTGGGATACTATAGCT | 6682 |
| gb:MT027062 | Organism:Severe | AAAACCCTTGCTACTCATGGTTAGCTGCTGTTAATAGTGTCCCTGGGATACTATAGCT | 6682 |
| gb:MT019529 | Organism:Severe | AAAACCCTTGCTACTCATGGTTAGCTGCTGTTAATAGTGTCCCTGGGATACTATAGCT | 6682 |
| gb:MN996529 | Organism:Severe | AAAACCCTTGCTACTCATGGTTAGCTGCTGTTAATAGTGTCCCTGGGATACTATAGCT | 6670 |
| gb:MN996531 | Organism:Severe | AAAACCCTTGCTACTCATGGTTAGCTGCTGTTAATAGTGTCCCTGGGATACTATAGCT | 6669 |
| gb:MT066176 | Organism:Severe | AAAACCCTTGCTACTCATGGTTAGCTGCTGTTAATAGTGTCCCTGGGATACTATAGCT | 6682 |
| gb:MT027064 | Organism:Severe | AAAACCCTTGCTACTCATGGTTAGCTGCTGTTAATAGTGTCCCTGGGATACTATAGCT | 6682 |
| gb:MN994468 | Organism:Severe | AAAACCCTTGCTACTCATGGTTAGCTGCTGTTAATAGTGTCCCTGGGATACTATAGCT | 6682 |
| gb:MT072688 | Organism:Severe | AAAACCCTTGCTACTCATGGTTAGCTGCTGTTAATAGTGTCCCTGGGATACTATAGCT | 6667 |
| gb:MN996527 | Organism:Severe | AAAACCCTTGCTACTCATGGTTAGCTGCTGTTAATAGTGTCCCTGGGATACTATAGCT | 6649 |
| gb:MT093631 | Organism:Severe | AAAACCCTTGCTACTCATGGTTAGCTGCTGTTAATAGTGTCCCTGGGATACTATAGCT | 6720 |
| gb:MT106053 | Organism:Severe | AAAACCCTTGCTACTCATGGTTAGCTGCTGTTAATAGTGTCCCTGGGATACTATAGCT | 6682 |
| gb:MT019533 | Organism:Severe | AAAACCCTTGCTACTCATGGTTAGCTGCTGTTAATAGTGTCCCTGGGATACTATAGCT | 6682 |
| gb:MT019531 | Organism:Severe | AAAACCCTTGCTACTCATGGTTAGCTGCTGTTAATAGTGTCCCTGGGATACTATAGCT | 6682 |
| gb:MN996528 | Organism:Severe | AAAACCCTTGCTACTCATGGTTAGCTGCTGTTAATAGTGTCCCTGGGATACTATAGCT | 6682 |
| gb:MN996530 | Organism:Severe | AAAACCCTTGCTACTCATGGTTAGCTGCTGTTAATAGTGTCCCTGGGATACTATAGCT | 6668 |
| gb:MN908947 | Organism:Severe | AAAACCCTTGCTACTCATGGTTAGCTGCTGTTAATAGTGTCCCTGGGATACTATAGCT | 6682 |
| gb:MT019532 | Organism:Severe | AAAACCCTTGCTACTCATGGTTAGCTGCTGTTAATAGTGTCCCTGGGATACTATAGCT | 6682 |

\*\*\*\*\*

|             |                 |                                                             |      |
|-------------|-----------------|-------------------------------------------------------------|------|
| gb:MT020781 | Organism:Severe | AATTATGCTAAGCCTTTTCTTAACAAAGTTGTTAGTACAACACTAACATAGTTACACGG | 6730 |
| gb:MT007544 | Organism:Severe | AATTATGCTAAGCCTTTTCTTAACAAAGTTGTTAGTACAACACTAACATAGTTACACGG | 6742 |
| gb:MN994467 | Organism:Severe | AATTATGCTAAGCCTTTTCTTAACAAAGTTGTTAGTACAACACTAACATAGTTACACGG | 6742 |
| gb:MT044257 | Organism:Severe | AATTATGCTAAGCCTTTTCTTAACAAAGTTGTTAGTACAACACTAACATAGTTACACGG | 6742 |
| gb:MT106054 | Organism:Severe | AATTATGCTAAGCCTTTTCTTAACAAAGTTGTTAGTACAACACTAACATAGTTACACGG | 6742 |
| gb:MT049951 | Organism:Severe | AATTATGCTAAGCCTTTTCTTAACAAAGTTGTTAGTACAACACTAACATAGTTACACGG | 6742 |
| gb:MN975262 | Organism:Severe | AATTATGCTAAGCCTTTTCTTAACAAAGTTGTTAGTACAACACTAACATAGTTACACGG | 6742 |
| gb:MT106052 | Organism:Severe | AATTATGCTAAGCCTTTTCTTAACAAAGTTGTTAGTACAACACTAACATAGTTACACGG | 6742 |
| gb:LC522975 | Organism:Severe | AATTATGCTAAGCCTTTTCTTAACAAAGTTGTTAGTACAACACTAACATAGTTACACGG | 6739 |
| gb:LC522973 | Organism:Severe | AATTATGCTAAGCCTTTTCTTAACAAAGTTGTTAGTACAACACTAACATAGTTACACGG | 6739 |
| gb:LC522974 | Organism:Severe | AATTATGCTAAGCCTTTTCTTAACAAAGTTGTTAGTACAACACTAACATAGTTACACGG | 6739 |
| gb:MN985325 | Organism:Severe | AATTATGCTAAGCCTTTTCTTAACAAAGTTGTTAGTACAACACTAACATAGTTACACGG | 6742 |
| gb:MT020881 | Organism:Severe | AATTATGCTAAGCCTTTTCTTAACAAAGTTGTTAGTACAACACTAACATAGTTACACGG | 6742 |
| gb:MT020880 | Organism:Severe | AATTATGCTAAGCCTTTTCTTAACAAAGTTGTTAGTACAACACTAACATAGTTACACGG | 6742 |
| gb:MT066175 | Organism:Severe | AATTATGCTAAGCCTTTTCTTAACAAAGTTGTTAGTACAACACTAACATAGTTACACGG | 6742 |
| gb:MN997409 | Organism:Severe | AATTATGCTAAGCCTTTTCTTAACAAAGTTGTTAGTACAACACTAACATAGTTACACGG | 6742 |
| gb:MN938384 | Organism:Severe | AATTATGCTAAGCCTTTTCTTAACAAAGTTGTTAGTACAACACTAACATAGTTACACGG | 6710 |
| gb:MT044258 | Organism:Severe | AATTATGCTAAGCCTTTTCTTAACAAAGTTGTTAGTACAACACTAACATAGTTACACGG | 6718 |
| gb:MT039890 | Organism:Severe | AATTATGCTAAGCCTTTTCTTAACAAAGTTGTTAGTACAACACTAACATAGTTACACGG | 6742 |
| gb:MN988713 | Organism:Severe | AATTATGCTAAGCCTTTTCTTAACAAAGTTGTTAGTACAACACTAACATAGTTACACGG | 6742 |
| gb:LC521925 | Organism:Severe | AATTATGCTAAGCCTTTTCTTAACAAAGTTGTTAGTACAACACTAACATAGTTACACGG | 6715 |
| gb:MT093571 | Organism:Severe | AATTATGCTAAGCCTTTTCTTAACAAAGTTGTTAGTACAACACTAACATAGTTACACGG | 6742 |
| gb:MT039887 | Organism:Severe | AATTATGCTAAGCCTTTTCTTAACAAAGTTGTTAGTACAACACTAACATAGTTACACGG | 6742 |
| gb:MT019530 | Organism:Severe | AATTATGCTAAGCCTTTTCTTAACAAAGTTGTTAGTACAACACTAACATAGTTACACGG | 6742 |
| gb:MT039888 | Organism:Severe | AATTATGCTAAGCCTTTTCTTAACAAAGTTGTTAGTACAACACTAACATAGTTACACGG | 6742 |
| gb:LC522972 | Organism:Severe | AATTATGCTAAGCCTTTTCTTAACAAAGTTGTTAGTACAACACTAACATAGTTACACGG | 6739 |
| gb:MT027063 | Organism:Severe | AATTATGCTAAGCCTTTTCTTAACAAAGTTGTTAGTACAACACTAACATAGTTACACGG | 6742 |
| gb:MT027062 | Organism:Severe | AATTATGCTAAGCCTTTTCTTAACAAAGTTGTTAGTACAACACTAACATAGTTACACGG | 6742 |
| gb:MT019529 | Organism:Severe | AATTATGCTAAGCCTTTTCTTAACAAAGTTGTTAGTACAACACTAACATAGTTACACGG | 6742 |
| gb:MN996529 | Organism:Severe | AATTATGCTAAGCCTTTTCTTAACAAAGTTGTTAGTACAACACTAACATAGTTACACGG | 6730 |
| gb:MN996531 | Organism:Severe | AATTATGCTAAGCCTTTTCTTAACAAAGTTGTTAGTACAACACTAACATAGTTACACGG | 6729 |
| gb:MT066176 | Organism:Severe | AATTATGCTAAGCCTTTTCTTAACAAAGTTGTTAGTACAACACTAACATAGTTACACGG | 6742 |
| gb:MT027064 | Organism:Severe | AATTATGCTAAGCCTTTTCTTAACAAAGTTGTTAGTACAACACTAACATAGTTACACGG | 6742 |
| gb:MN994468 | Organism:Severe | AATTATGCTAAGCCTTTTCTTAACAAAGTTGTTAGTACAACACTAACATAGTTACACGG | 6742 |
| gb:MT072688 | Organism:Severe | AATTATGCTAAGCCTTTTCTTAACAAAGTTGTTAGTACAACACTAACATAGTTACACGG | 6727 |
| gb:MN996527 | Organism:Severe | AATTATGCTAAGCCTTTTCTTAACAAAGTTGTTAGTACAACACTAACATAGTTACACGG | 6709 |
| gb:MT093631 | Organism:Severe | AATTATGCTAAGCCTTTTCTTAACAAAGTTGTTAGTACAACACTAACATAGTTACACGG | 6780 |
| gb:MT106053 | Organism:Severe | AATTATGCTAAGCCTTTTCTTAACAAAGTTGTTAGTACAACACTAACATAGTTACACGG | 6742 |
| gb:MT019533 | Organism:Severe | AATTATGCTAAGCCTTTTCTTAACAAAGTTGTTAGTACAACACTAACATAGTTACACGG | 6742 |
| gb:MT019531 | Organism:Severe | AATTATGCTAAGCCTTTTCTTAACAAAGTTGTTAGTACAACACTAACATAGTTACACGG | 6742 |
| gb:MN996528 | Organism:Severe | AATTATGCTAAGCCTTTTCTTAACAAAGTTGTTAGTACAACACTAACATAGTTACACGG | 6742 |
| gb:MN996530 | Organism:Severe | AATTATGCTAAGCCTTTTCTTAACAAAGTTGTTAGTACAACACTAACATAGTTACACGG | 6728 |
| gb:MN908947 | Organism:Severe | AATTATGCTAAGCCTTTTCTTAACAAAGTTGTTAGTACAACACTAACATAGTTACACGG | 6742 |
| gb:MT019532 | Organism:Severe | AATTATGCTAAGCCTTTTCTTAACAAAGTTGTTAGTACAACACTAACATAGTTACACGG | 6742 |



|             |                 |                            |      |
|-------------|-----------------|----------------------------|------|
| gb:MT044258 | Organism:Severe | TGTACTTTTACTAGAAGTACAAATTC | 6838 |
| gb:MT039890 | Organism:Severe | TGTACTTTTACTAGAAGTACAAATTC | 6862 |
| gb:MN988713 | Organism:Severe | TGTACTTTTACTAGAAGTACAAATTC | 6862 |
| gb:LC521925 | Organism:Severe | TGTACTTTTACTAGAAGTACAAATTC | 6835 |
| gb:MT093571 | Organism:Severe | TGTACTTTTACTAGAAGTACAAATTC | 6862 |
| gb:MT039887 | Organism:Severe | TGTACTTTTACTAGAAGTACAAATTC | 6862 |
| gb:MT019530 | Organism:Severe | TGTACTTTTACTAGAAGTACAAATTC | 6862 |
| gb:MT039888 | Organism:Severe | TGTACTTTTACTAGAAGTACAAATTC | 6862 |
| gb:LC522972 | Organism:Severe | TGTACTTTTACTAGAAGTACAAATTC | 6859 |
| gb:MT027063 | Organism:Severe | TGTACTTTTACTAGAAGTACAAATTC | 6862 |
| gb:MT027062 | Organism:Severe | TGTACTTTTACTAGAAGTACAAATTC | 6862 |
| gb:MT019529 | Organism:Severe | TGTACTTTTACTAGAAGTACAAATTC | 6862 |
| gb:MN996529 | Organism:Severe | TGTACTTTTACTAGAAGTACAAATTC | 6850 |
| gb:MN996531 | Organism:Severe | TGTACTTTTACTAGAAGTACAAATTC | 6849 |
| gb:MT066176 | Organism:Severe | TGTACTTTTACTAGAAGTACAAATTC | 6862 |
| gb:MT027064 | Organism:Severe | TGTACTTTTACTAGAAGTACAAATTC | 6862 |
| gb:MN994468 | Organism:Severe | TGTACTTTTACTAGAAGTACAAATTC | 6862 |
| gb:MT072688 | Organism:Severe | TGTACTTTTACTAGAAGTACAAATTC | 6847 |
| gb:MN996527 | Organism:Severe | TGTACTTTTACTAGAAGTACAAATTC | 6829 |
| gb:MT093631 | Organism:Severe | TGTACTTTTACTAGAAGTACAAATTC | 6900 |
| gb:MT106053 | Organism:Severe | TGTACTTTTACTAGAAGTACAAATTC | 6862 |
| gb:MT019533 | Organism:Severe | TGTACTTTTACTAGAAGTACAAATTC | 6862 |
| gb:MT019531 | Organism:Severe | TGTACTTTTACTAGAAGTACAAATTC | 6862 |
| gb:MN996528 | Organism:Severe | TGTACTTTTACTAGAAGTACAAATTC | 6862 |
| gb:MN996530 | Organism:Severe | TGTACTTTTACTAGAAGTACAAATTC | 6848 |
| gb:MN908947 | Organism:Severe | TGTACTTTTACTAGAAGTACAAATTC | 6862 |
| gb:MT019532 | Organism:Severe | TGTACTTTTACTAGAAGTACAAATTC | 6862 |

\*\*\*\*\*

|             |                 |                      |      |
|-------------|-----------------|----------------------|------|
| gb:MT020781 | Organism:Severe | AAGAATACTGTTAAGAGTGT | 6910 |
| gb:MT007544 | Organism:Severe | AAGAATACTGTTAAGAGTGT | 6922 |
| gb:MN994467 | Organism:Severe | AAGAATACTGTTAAGAGTGT | 6922 |
| gb:MT044257 | Organism:Severe | AAGAATACTGTTAAGAGTGT | 6922 |
| gb:MT106054 | Organism:Severe | AAGAATACTGTTAAGAGTGT | 6922 |
| gb:MT049951 | Organism:Severe | AAGAATACTGTTAAGAGTGT | 6922 |
| gb:MN975262 | Organism:Severe | AAGAATACTGTTAAGAGTGT | 6922 |
| gb:MT106052 | Organism:Severe | AAGAATACTGTTAAGAGTGT | 6922 |
| gb:LC522975 | Organism:Severe | AAGAATACTGTTAAGAGTGT | 6919 |
| gb:LC522973 | Organism:Severe | AAGAATACTGTTAAGAGTGT | 6919 |
| gb:LC522974 | Organism:Severe | AAGAATACTGTTAAGAGTGT | 6919 |
| gb:MN985325 | Organism:Severe | AAGAATACTGTTAAGAGTGT | 6922 |
| gb:MT020881 | Organism:Severe | AAGAATACTGTTAAGAGTGT | 6922 |
| gb:MT020880 | Organism:Severe | AAGAATACTGTTAAGAGTGT | 6922 |
| gb:MT066175 | Organism:Severe | AAGAATACTGTTAAGAGTGT | 6922 |
| gb:MN997409 | Organism:Severe | AAGAATACTGTTAAGAGTGT | 6922 |
| gb:MN938384 | Organism:Severe | AAGAATACTGTTAAGAGTGT | 6890 |
| gb:MT044258 | Organism:Severe | AAGAATACTGTTAAGAGTGT | 6898 |
| gb:MT039890 | Organism:Severe | AAGAATACTGTTAAGAGTGT | 6922 |
| gb:MN988713 | Organism:Severe | AAGAATACTGTTAAGAGTGT | 6922 |
| gb:LC521925 | Organism:Severe | AAGAATACTGTTAAGAGTGT | 6895 |
| gb:MT093571 | Organism:Severe | AAGAATACTGTTAAGAGTGT | 6922 |
| gb:MT039887 | Organism:Severe | AAGAATACTGTTAAGAGTGT | 6922 |
| gb:MT019530 | Organism:Severe | AAGAATACTGTTAAGAGTGT | 6922 |
| gb:MT039888 | Organism:Severe | AAGAATACTGTTAAGAGTGT | 6922 |
| gb:LC522972 | Organism:Severe | AAGAATACTGTTAAGAGTGT | 6919 |
| gb:MT027063 | Organism:Severe | AAGAATACTGTTAAGAGTGT | 6922 |
| gb:MT027062 | Organism:Severe | AAGAATACTGTTAAGAGTGT | 6922 |
| gb:MT019529 | Organism:Severe | AAGAATACTGTTAAGAGTGT | 6922 |
| gb:MN996529 | Organism:Severe | AAGAATACTGTTAAGAGTGT | 6910 |
| gb:MN996531 | Organism:Severe | AAGAATACTGTTAAGAGTGT | 6909 |
| gb:MT066176 | Organism:Severe | AAGAATACTGTTAAGAGTGT | 6922 |
| gb:MT027064 | Organism:Severe | AAGAATACTGTTAAGAGTGT | 6922 |
| gb:MN994468 | Organism:Severe | AAGAATACTGTTAAGAGTGT | 6922 |
| gb:MT072688 | Organism:Severe | AAGAATACTGTTAAGAGTGT | 6907 |
| gb:MN996527 | Organism:Severe | AAGAATACTGTTAAGAGTGT | 6889 |

|             |                 |                                                               |      |
|-------------|-----------------|---------------------------------------------------------------|------|
| gb:MT093631 | Organism:Severe | AAGAATACTGTTAAGAGTGTCCGGTAAATTTTGTCTAGAGGCTTCATTTAATTATTTGAAG | 6960 |
| gb:MT106053 | Organism:Severe | AAGAATACTGTTAAGAGTGTCCGGTAAATTTTGTCTAGAGGCTTCATTTAATTATTTGAAG | 6922 |
| gb:MT019533 | Organism:Severe | AAGAATACTGTTAAGAGTGTCCGGTAAATTTTGTCTAGAGGCTTCATTTAATTATTTGAAG | 6922 |
| gb:MT019531 | Organism:Severe | AAGAATACTGTTAAGAGTGTCCGGTAAATTTTGTCTAGAGGCTTCATTTAATTATTTGAAG | 6922 |
| gb:MN996528 | Organism:Severe | AAGAATACTGTTAAGAGTGTCCGGTAAATTTTGTCTAGAGGCTTCATTTAATTATTTGAAG | 6922 |
| gb:MN996530 | Organism:Severe | AAGAATACTGTTAAGAGTGTCCGGTAAATTTTGTCTAGAGGCTTCATTTAATTATTTGAAG | 6908 |
| gb:MN908947 | Organism:Severe | AAGAATACTGTTAAGAGTGTCCGGTAAATTTTGTCTAGAGGCTTCATTTAATTATTTGAAG | 6922 |
| gb:MT019532 | Organism:Severe | AAGAATACTGTTAAGAGTGTCCGGTAAATTTTGTCTAGAGGCTTCATTTAATTATTTGAAG | 6922 |

\*\*\*\*\*

|             |                 |                                                             |      |
|-------------|-----------------|-------------------------------------------------------------|------|
| gb:MT020781 | Organism:Severe | TCACCTAATTTTTCTAAACTGATAAATATTATAATTTGGTTTTACTATTAAGTGTTTGC | 6970 |
| gb:MT007544 | Organism:Severe | TCACCTAATTTTTCTAAACTGATAAATATTATAATTTGGTTTTACTATTAAGTGTTTGC | 6982 |
| gb:MN994467 | Organism:Severe | TCACCTAATTTTTCTAAACTGATAAATATTATAATTTGGTTTTACTATTAAGTGTTTGC | 6982 |
| gb:MT044257 | Organism:Severe | TCACCTAATTTTTCTAAACTGATAAATATTATAATTTGGTTTTACTATTAAGTGTTTGC | 6982 |
| gb:MT106054 | Organism:Severe | TCACCTAATTTTTCTAAACTGATAAATATTATAATTTGGTTTTACTATTAAGTGTTTGC | 6982 |
| gb:MT049951 | Organism:Severe | TCACCTAATTTTTCTAAACTGATAAATATTATAATTTGGTTTTACTATTAAGTGTTTGC | 6982 |
| gb:MN975262 | Organism:Severe | TCACCTAATTTTTCTAAACTGATAAATATTATAATTTGGTTTTACTATTAAGTGTTTGC | 6982 |
| gb:MT106052 | Organism:Severe | TCACCTAATTTTTCTAAACTGATAAATATTATAATTTGGTTTTACTATTAAGTGTTTGC | 6982 |
| gb:LC522975 | Organism:Severe | TCACCTAATTTTTCTAAACTGATAAATATTATAATTTGGTTTTACTATTAAGTGTTTGC | 6979 |
| gb:LC522973 | Organism:Severe | TCACCTAATTTTTCTAAACTGATAAATATTATAATTTGGTTTTACTATTAAGTGTTTGC | 6979 |
| gb:LC522974 | Organism:Severe | TCACCTAATTTTTCTAAACTGATAAATATTATAATTTGGTTTTACTATTAAGTGTTTGC | 6979 |
| gb:MN985325 | Organism:Severe | TCACCTAATTTTTCTAAACTGATAAATATTATAATTTGGTTTTACTATTAAGTGTTTGC | 6982 |
| gb:MT020881 | Organism:Severe | TCACCTAATTTTTCTAAACTGATAAATATTATAATTTGGTTTTACTATTAAGTGTTTGC | 6982 |
| gb:MT020880 | Organism:Severe | TCACCTAATTTTTCTAAACTGATAAATATTATAATTTGGTTTTACTATTAAGTGTTTGC | 6982 |
| gb:MT066175 | Organism:Severe | TCACCTAATTTTTCTAAACTGATAAATATTATAATTTGGTTTTACTATTAAGTGTTTGC | 6982 |
| gb:MN997409 | Organism:Severe | TCACCTAATTTTTCTAAACTGATAAATATTATAATTTGGTTTTACTATTAAGTGTTTGC | 6982 |
| gb:MN938384 | Organism:Severe | TCACCTAATTTTTCTAAACTGATAAATATTATAATTTGGTTTTACTATTAAGTGTTTGC | 6950 |
| gb:MT044258 | Organism:Severe | TCACCTAATTTTTCTAAACTGATAAATATTATAATTTGGTTTTACTATTAAGTGTTTGC | 6958 |
| gb:MT039890 | Organism:Severe | TCACCTAATTTTTCTAAACTGATAAATATTATAATTTGGTTTTACTATTAAGTGTTTGC | 6982 |
| gb:MN988713 | Organism:Severe | TCACCTAATTTTTCTAAACTGATAAATATTATAATTTGGTTTTACTATTAAGTGTTTGC | 6982 |
| gb:LC521925 | Organism:Severe | TCACCTAATTTTTCTAAACTGATAAATATTATAATTTGGTTTTACTATTAAGTGTTTGC | 6955 |
| gb:MT093571 | Organism:Severe | TCACCTAATTTTTCTAAACTGATAAATATTATAATTTGGTTTTACTATTAAGTGTTTGC | 6982 |
| gb:MT039887 | Organism:Severe | TCACCTAATTTTTCTAAACTGATAAATATTATAATTTGGTTTTACTATTAAGTGTTTGC | 6982 |
| gb:MT019530 | Organism:Severe | TCACCTAATTTTTCTAAACTGATAAATATTATAATTTGGTTTTACTATTAAGTGTTTGC | 6982 |
| gb:MT039888 | Organism:Severe | TCACCTAATTTTTCTAAACTGATAAATATTATAATTTGGTTTTACTATTAAGTGTTTGC | 6982 |
| gb:LC522972 | Organism:Severe | TCACCTAATTTTTCTAAACTGATAAATATTATAATTTGGTTTTACTATTAAGTGTTTGC | 6979 |
| gb:MT027063 | Organism:Severe | TCACCTAATTTTTCTAAACTGATAAATATTATAATTTGGTTTTACTATTAAGTGTTTGC | 6982 |
| gb:MT027062 | Organism:Severe | TCACCTAATTTTTCTAAACTGATAAATATTATAATTTGGTTTTACTATTAAGTGTTTGC | 6982 |
| gb:MT019529 | Organism:Severe | TCACCTAATTTTTCTAAACTGATAAATATTATAATTTGGTTTTACTATTAAGTGTTTGC | 6982 |
| gb:MN996529 | Organism:Severe | TCACCTAATTTTTCTAAACTGATAAATATTATAATTTGGTTTTACTATTAAGTGTTTGC | 6970 |
| gb:MN996531 | Organism:Severe | TCACCTAATTTTTCTAAACTGATAAATATTATAATTTGGTTTTACTATTAAGTGTTTGC | 6969 |
| gb:MT066176 | Organism:Severe | TCACCTAATTTTTCTAAACTGATAAATATTATAATTTGGTTTTACTATTAAGTGTTTGC | 6982 |
| gb:MT027064 | Organism:Severe | TCACCTAATTTTTCTAAACTGATAAATATTATAATTTGGTTTTACTATTAAGTGTTTGC | 6982 |
| gb:MN994468 | Organism:Severe | TCACCTAATTTTTCTAAACTGATAAATATTATAATTTGGTTTTACTATTAAGTGTTTGC | 6982 |
| gb:MT072688 | Organism:Severe | TCACCTAATTTTTCTAAACTGATAAATATTATAATTTGGTTTTACTATTAAGTGTTTGC | 6967 |
| gb:MN996527 | Organism:Severe | TCACCTAATTTTTCTAAACTGATAAATATTATAATTTGGTTTTACTATTAAGTGTTTGC | 6949 |
| gb:MT093631 | Organism:Severe | TCACCTAATTTTTCTAAACTGATAAATATTATAATTTGGTTTTACTATTAAGTGTTTGC | 7020 |
| gb:MT106053 | Organism:Severe | TCACCTAATTTTTCTAAACTGATAAATATTATAATTTGGTTTTACTATTAAGTGTTTGC | 6982 |
| gb:MT019533 | Organism:Severe | TCACCTAATTTTTCTAAACTGATAAATATTATAATTTGGTTTTACTATTAAGTGTTTGC | 6982 |
| gb:MT019531 | Organism:Severe | TCACCTAATTTTTCTAAACTGATAAATATTATAATTTGGTTTTACTATTAAGTGTTTGC | 6982 |
| gb:MN996528 | Organism:Severe | TCACCTAATTTTTCTAAACTGATAAATATTATAATTTGGTTTTACTATTAAGTGTTTGC | 6982 |
| gb:MN996530 | Organism:Severe | TCACCTAATTTTTCTAAACTGATAAATATTATAATTTGGTTTTACTATTAAGTGTTTGC | 6968 |
| gb:MN908947 | Organism:Severe | TCACCTAATTTTTCTAAACTGATAAATATTATAATTTGGTTTTACTATTAAGTGTTTGC | 6982 |
| gb:MT019532 | Organism:Severe | TCACCTAATTTTTCTAAACTGATAAATATTATAATTTGGTTTTACTATTAAGTGTTTGC | 6982 |

\*\*\*\*\*

|             |                 |                                                             |      |
|-------------|-----------------|-------------------------------------------------------------|------|
| gb:MT020781 | Organism:Severe | CTAGGTTCTTTAATCTACTCAACCGTGCTTTAGGTGTTTTAATGTCTAATTTAGGCATG | 7030 |
| gb:MT007544 | Organism:Severe | CTAGGTTCTTTAATCTACTCAACCGTGCTTTAGGTGTTTTAATGTCTAATTTAGGCATG | 7042 |
| gb:MN994467 | Organism:Severe | CTAGGTTCTTTAATCTACTCAACCGTGCTTTAGGTGTTTTAATGTCTAATTTAGGCATG | 7042 |
| gb:MT044257 | Organism:Severe | CTAGGTTCTTTAATCTACTCAACCGTGCTTTAGGTGTTTTAATGTCTAATTTAGGCATG | 7042 |
| gb:MT106054 | Organism:Severe | CTAGGTTCTTTAATCTACTCAACCGTGCTTTAGGTGTTTTAATGTCTAATTTAGGCATG | 7042 |
| gb:MT049951 | Organism:Severe | CTAGGTTCTTTAATCTACTCAACCGTGCTTTAGGTGTTTTAATGTCTAATTTAGGCATG | 7042 |
| gb:MN975262 | Organism:Severe | CTAGGTTCTTTAATCTACTCAACCGTGCTTTAGGTGTTTTAATGTCTAATTTAGGCATG | 7042 |
| gb:MT106052 | Organism:Severe | CTAGGTTCTTTAATCTACTCAACCGTGCTTTAGGTGTTTTAATGTCTAATTTAGGCATG | 7042 |
| gb:LC522975 | Organism:Severe | CTAGGTTCTTTAATCTACTCAACCGTGCTTTAGGTGTTTTAATGTCTAATTTAGGCATG | 7039 |



|             |                 |                                                             |      |
|-------------|-----------------|-------------------------------------------------------------|------|
| gb:MT019529 | Organism:Severe | CCTTCTTACTGTACTGGTTACAGAGAAGGCTATTTGAACTCTACTAATGTCACATTGCA | 7102 |
| gb:MN996529 | Organism:Severe | CCTTCTTACTGTACTGGTTACAGAGAAGGCTATTTGAACTCTACTAATGTCACATTGCA | 7090 |
| gb:MN996531 | Organism:Severe | CCTTCTTACTGTACTGGTTACAGAGAAGGCTATTTGAACTCTACTAATGTCACATTGCA | 7089 |
| gb:MT066176 | Organism:Severe | CCTTCTTACTGTACTGGTTACAGAGAAGGCTATTTGAACTCTACTAATGTCACATTGCA | 7102 |
| gb:MT027064 | Organism:Severe | CCTTCTTACTGTACTGGTTACAGAGAAGGCTATTTGAACTCTACTAATGTCACATTGCA | 7102 |
| gb:MN994468 | Organism:Severe | CCTTCTTACTGTACTGGTTACAGAGAAGGCTATTTGAACTCTACTAATGTCACATTGCA | 7102 |
| gb:MT072688 | Organism:Severe | CCTTCTTACTGTACTGGTTACAGAGAAGGCTATTTGAACTCTACTAATGTCACATTGCA | 7087 |
| gb:MN996527 | Organism:Severe | CCTTCTTACTGTACTGGTTACAGAGAAGGCTATTTGAACTCTACTAATGTCACATTGCA | 7069 |
| gb:MT093631 | Organism:Severe | CCTTCTTACTGTACTGGTTACAGAGAAGGCTATTTGAACTCTACTAATGTCACATTGCA | 7140 |
| gb:MT106053 | Organism:Severe | CCTTCTTACTGTACTGGTTACAGAGAAGGCTATTTGAACTCTACTAATGTCACATTGCA | 7102 |
| gb:MT019533 | Organism:Severe | CCTTCTTACTGTACTGGTTACAGAGAAGGCTATTTGAACTCTACTAATGTCACATTGCA | 7102 |
| gb:MT019531 | Organism:Severe | CCTTCTTACTGTACTGGTTACAGAGAAGGCTATTTGAACTCTACTAATGTCACATTGCA | 7102 |
| gb:MN996528 | Organism:Severe | CCTTCTTACTGTACTGGTTACAGAGAAGGCTATTTGAACTCTACTAATGTCACATTGCA | 7102 |
| gb:MN996530 | Organism:Severe | CCTTCTTACTGTACTGGTTACAGAGAAGGCTATTTGAACTCTACTAATGTCACATTGCA | 7088 |
| gb:MN908947 | Organism:Severe | CCTTCTTACTGTACTGGTTACAGAGAAGGCTATTTGAACTCTACTAATGTCACATTGCA | 7102 |
| gb:MT019532 | Organism:Severe | CCTTCTTACTGTACTGGTTACAGAGAAGGCTATTTGAACTCTACTAATGTCACATTGCA | 7102 |

\*\*\*\*\*

|             |                 |                                                          |      |
|-------------|-----------------|----------------------------------------------------------|------|
| gb:MT020781 | Organism:Severe | ACCTACTGTACTGGTCTATACCTTGTAGTGTGGTCTTAGTGGTTAGATTCTTAGAC | 7150 |
| gb:MT007544 | Organism:Severe | ACCTACTGTACTGGTCTATACCTTGTAGTGTGGTCTTAGTGGTTAGATTCTTAGAC | 7162 |
| gb:MN994467 | Organism:Severe | ACCTACTGTACTGGTCTATACCTTGTAGTGTGGTCTTAGTGGTTAGATTCTTAGAC | 7162 |
| gb:MT044257 | Organism:Severe | ACCTACTGTACTGGTCTATACCTTGTAGTGTGGTCTTAGTGGTTAGATTCTTAGAC | 7162 |
| gb:MT106054 | Organism:Severe | ACCTACTGTACTGGTCTATACCTTGTAGTGTGGTCTTAGTGGTTAGATTCTTAGAC | 7162 |
| gb:MT049951 | Organism:Severe | ACCTACTGTACTGGTCTATACCTTGTAGTGTGGTCTTAGTGGTTAGATTCTTAGAC | 7162 |
| gb:MN975262 | Organism:Severe | ACCTACTGTACTGGTCTATACCTTGTAGTGTGGTCTTAGTGGTTAGATTCTTAGAC | 7162 |
| gb:MT106052 | Organism:Severe | ACCTACTGTACTGGTCTATACCTTGTAGTGTGGTCTTAGTGGTTAGATTCTTAGAC | 7162 |
| gb:LC522975 | Organism:Severe | ACCTACTGTACTGGTCTATACCTTGTAGTGTGGTCTTAGTGGTTAGATTCTTAGAC | 7159 |
| gb:LC522973 | Organism:Severe | ACCTACTGTACTGGTCTATACCTTGTAGTGTGGTCTTAGTGGTTAGATTCTTAGAC | 7159 |
| gb:LC522974 | Organism:Severe | ACCTACTGTACTGGTCTATACCTTGTAGTGTGGTCTTAGTGGTTAGATTCTTAGAC | 7159 |
| gb:MN985325 | Organism:Severe | ACCTACTGTACTGGTCTATACCTTGTAGTGTGGTCTTAGTGGTTAGATTCTTAGAC | 7162 |
| gb:MT020881 | Organism:Severe | ACCTACTGTACTGGTCTATACCTTGTAGTGTGGTCTTAGTGGTTAGATTCTTAGAC | 7162 |
| gb:MT020880 | Organism:Severe | ACCTACTGTACTGGTCTATACCTTGTAGTGTGGTCTTAGTGGTTAGATTCTTAGAC | 7162 |
| gb:MT066175 | Organism:Severe | ACCTACTGTACTGGTCTATACCTTGTAGTGTGGTCTTAGTGGTTAGATTCTTAGAC | 7162 |
| gb:MN997409 | Organism:Severe | ACCTACTGTACTGGTCTATACCTTGTAGTGTGGTCTTAGTGGTTAGATTCTTAGAC | 7162 |
| gb:MN938384 | Organism:Severe | ACCTACTGTACTGGTCTATACCTTGTAGTGTGGTCTTAGTGGTTAGATTCTTAGAC | 7130 |
| gb:MT044258 | Organism:Severe | ACCTACTGTACTGGTCTATACCTTGTAGTGTGGTCTTAGTGGTTAGATTCTTAGAC | 7138 |
| gb:MT039890 | Organism:Severe | ACCTACTGTACTGGTCTATACCTTGTAGTGTGGTCTTAGTGGTTAGATTCTTAGAC | 7162 |
| gb:MN988713 | Organism:Severe | ACCTACTGTACTGGTCTATACCTTGTAGTGTGGTCTTAGTGGTTAGATTCTTAGAC | 7162 |
| gb:LC521925 | Organism:Severe | ACCTACTGTACTGGTCTATACCTTGTAGTGTGGTCTTAGTGGTTAGATTCTTAGAC | 7135 |
| gb:MT093571 | Organism:Severe | ACCTACTGTACTGGTCTATACCTTGTAGTGTGGTCTTAGTGGTTAGATTCTTAGAC | 7162 |
| gb:MT039887 | Organism:Severe | ACCTACTGTACTGGTCTATACCTTGTAGTGTGGTCTTAGTGGTTAGATTCTTAGAC | 7162 |
| gb:MT019530 | Organism:Severe | ACCTACTGTACTGGTCTATACCTTGTAGTGTGGTCTTAGTGGTTAGATTCTTAGAC | 7162 |
| gb:MT039888 | Organism:Severe | ACCTACTGTACTGGTCTATACCTTGTAGTGTGGTCTTAGTGGTTAGATTCTTAGAC | 7162 |
| gb:LC522972 | Organism:Severe | ACCTACTGTACTGGTCTATACCTTGTAGTGTGGTCTTAGTGGTTAGATTCTTAGAC | 7159 |
| gb:MT027063 | Organism:Severe | ACCTACTGTACTGGTCTATACCTTGTAGTGTGGTCTTAGTGGTTAGATTCTTAGAC | 7162 |
| gb:MT027062 | Organism:Severe | ACCTACTGTACTGGTCTATACCTTGTAGTGTGGTCTTAGTGGTTAGATTCTTAGAC | 7162 |
| gb:MT019529 | Organism:Severe | ACCTACTGTACTGGTCTATACCTTGTAGTGTGGTCTTAGTGGTTAGATTCTTAGAC | 7162 |
| gb:MN996529 | Organism:Severe | ACCTACTGTACTGGTCTATACCTTGTAGTGTGGTCTTAGTGGTTAGATTCTTAGAC | 7150 |
| gb:MN996531 | Organism:Severe | ACCTACTGTACTGGTCTATACCTTGTAGTGTGGTCTTAGTGGTTAGATTCTTAGAC | 7149 |
| gb:MT066176 | Organism:Severe | ACCTACTGTACTGGTCTATACCTTGTAGTGTGGTCTTAGTGGTTAGATTCTTAGAC | 7162 |
| gb:MT027064 | Organism:Severe | ACCTACTGTACTGGTCTATACCTTGTAGTGTGGTCTTAGTGGTTAGATTCTTAGAC | 7162 |
| gb:MN994468 | Organism:Severe | ACCTACTGTACTGGTCTATACCTTGTAGTGTGGTCTTAGTGGTTAGATTCTTAGAC | 7162 |
| gb:MT072688 | Organism:Severe | ACCTACTGTACTGGTCTATACCTTGTAGTGTGGTCTTAGTGGTTAGATTCTTAGAC | 7147 |
| gb:MN996527 | Organism:Severe | ACCTACTGTACTGGTCTATACCTTGTAGTGTGGTCTTAGTGGTTAGATTCTTAGAC | 7129 |
| gb:MT093631 | Organism:Severe | ACCTACTGTACTGGTCTATACCTTGTAGTGTGGTCTTAGTGGTTAGATTCTTAGAC | 7200 |
| gb:MT106053 | Organism:Severe | ACCTACTGTACTGGTCTATACCTTGTAGTGTGGTCTTAGTGGTTAGATTCTTAGAC | 7162 |
| gb:MT019533 | Organism:Severe | ACCTACTGTACTGGTCTATACCTTGTAGTGTGGTCTTAGTGGTTAGATTCTTAGAC | 7162 |
| gb:MT019531 | Organism:Severe | ACCTACTGTACTGGTCTATACCTTGTAGTGTGGTCTTAGTGGTTAGATTCTTAGAC | 7162 |
| gb:MN996528 | Organism:Severe | ACCTACTGTACTGGTCTATACCTTGTAGTGTGGTCTTAGTGGTTAGATTCTTAGAC | 7162 |
| gb:MN996530 | Organism:Severe | ACCTACTGTACTGGTCTATACCTTGTAGTGTGGTCTTAGTGGTTAGATTCTTAGAC | 7148 |
| gb:MN908947 | Organism:Severe | ACCTACTGTACTGGTCTATACCTTGTAGTGTGGTCTTAGTGGTTAGATTCTTAGAC | 7162 |
| gb:MT019532 | Organism:Severe | ACCTACTGTACTGGTCTATACCTTGTAGTGTGGTCTTAGTGGTTAGATTCTTAGAC | 7162 |

\*\*\*\*\*

|             |                 |                                                              |      |
|-------------|-----------------|--------------------------------------------------------------|------|
| gb:MT020781 | Organism:Severe | ACCTATCCTTCTTTAGAACTATACAAATTACCATTTTCATCTTTTAAATGGGATTTAACT | 7210 |
|-------------|-----------------|--------------------------------------------------------------|------|

|             |                 |                                                               |      |
|-------------|-----------------|---------------------------------------------------------------|------|
| gb:MT007544 | Organism:Severe | ACCTATCCTTCTTTAGAAACTATACAAATTACCATTTTCATCTTTTAAATGGGATTTAACT | 7222 |
| gb:MN994467 | Organism:Severe | ACCTATCCTTCTTTAGAAACTATACAAATTACCATTTTCATCTTTTAAATGGGATTTAACT | 7222 |
| gb:MT044257 | Organism:Severe | ACCTATCCTTCTTTAGAAACTATACAAATTACCATTTTCATCTTTTAAATGGGATTTAACT | 7222 |
| gb:MT106054 | Organism:Severe | ACCTATCCTTCTTTAGAAACTATACAAATTACCATTTTCATCTTTTAAATGGGATTTAACT | 7222 |
| gb:MT049951 | Organism:Severe | ACCTATCCTTCTTTAGAAACTATACAAATTACCATTTTCATCTTTTAAATGGGATTTAACT | 7222 |
| gb:MN975262 | Organism:Severe | ACCTATCCTTCTTTAGAAACTATACAAATTACCATTTTCATCTTTTAAATGGGATTTAACT | 7222 |
| gb:MT106052 | Organism:Severe | ACCTATCCTTCTTTAGAAACTATACAAATTACCATTTTCATCTTTTAAATGGGATTTAACT | 7222 |
| gb:LC522975 | Organism:Severe | ACCTATCCTTCTTTAGAAACTATACAAATTACCATTTTCATCTTTTAAATGGGATTTAACT | 7219 |
| gb:LC522973 | Organism:Severe | ACCTATCCTTCTTTAGAAACTATACAAATTACCATTTTCATCTTTTAAATGGGATTTAACT | 7219 |
| gb:LC522974 | Organism:Severe | ACCTATCCTTCTTTAGAAACTATACAAATTACCATTTTCATCTTTTAAATGGGATTTAACT | 7219 |
| gb:MN985325 | Organism:Severe | ACCTATCCTTCTTTAGAAACTATACAAATTACCATTTTCATCTTTTAAATGGGATTTAACT | 7222 |
| gb:MT020881 | Organism:Severe | ACCTATCCTTCTTTAGAAACTATACAAATTACCATTTTCATCTTTTAAATGGGATTTAACT | 7222 |
| gb:MT020880 | Organism:Severe | ACCTATCCTTCTTTAGAAACTATACAAATTACCATTTTCATCTTTTAAATGGGATTTAACT | 7222 |
| gb:MT066175 | Organism:Severe | ACCTATCCTTCTTTAGAAACTATACAAATTACCATTTTCATCTTTTAAATGGGATTTAACT | 7222 |
| gb:MN997409 | Organism:Severe | ACCTATCCTTCTTTAGAAACTATACAAATTACCATTTTCATCTTTTAAATGGGATTTAACT | 7222 |
| gb:MN938384 | Organism:Severe | ACCTATCCTTCTTTAGAAACTATACAAATTACCATTTTCATCTTTTAAATGGGATTTAACT | 7190 |
| gb:MT044258 | Organism:Severe | ACCTATCCTTCTTTAGAAACTATACAAATTACCATTTTCATCTTTTAAATGGGATTTAACT | 7198 |
| gb:MT039890 | Organism:Severe | ACCTATCCTTCTTTAGAAACTATACAAATTACCATTTTCATCTTTTAAATGGGATTTAACT | 7222 |
| gb:MN988713 | Organism:Severe | ACCTATCCTTCTTTAGAAACTATACAAATTACCATTTTCATCTTTTAAATGGGATTTAACT | 7222 |
| gb:LC521925 | Organism:Severe | ACCTATCCTTCTTTAGAAACTATACAAATTACCATTTTCATCTTTTAAATGGGATTTAACT | 7195 |
| gb:MT093571 | Organism:Severe | ACCTATCCTTCTTTAGAAACTATACAAATTACCATTTTCATCTTTTAAATGGGATTTAACT | 7222 |
| gb:MT039887 | Organism:Severe | ACCTATCCTTCTTTAGAAACTATACAAATTACCATTTTCATCTTTTAAATGGGATTTAACT | 7222 |
| gb:MT019530 | Organism:Severe | ACCTATCCTTCTTTAGAAACTATACAAATTACCATTTTCATCTTTTAAATGGGATTTAACT | 7222 |
| gb:MT039888 | Organism:Severe | ACCTATCCTTCTTTAGAAACTATACAAATTACCATTTTCATCTTTTAAATGGGATTTAACT | 7222 |
| gb:LC522972 | Organism:Severe | ACCTATCCTTCTTTAGAAACTATACAAATTACCATTTTCATCTTTTAAATGGGATTTAACT | 7219 |
| gb:MT027063 | Organism:Severe | ACCTATCCTTCTTTAGAAACTATACAAATTACCATTTTCATCTTTTAAATGGGATTTAACT | 7222 |
| gb:MT027062 | Organism:Severe | ACCTATCCTTCTTTAGAAACTATACAAATTACCATTTTCATCTTTTAAATGGGATTTAACT | 7222 |
| gb:MT019529 | Organism:Severe | ACCTATCCTTCTTTAGAAACTATACAAATTACCATTTTCATCTTTTAAATGGGATTTAACT | 7222 |
| gb:MN996529 | Organism:Severe | ACCTATCCTTCTTTAGAAACTATACAAATTACCATTTTCATCTTTTAAATGGGATTTAACT | 7210 |
| gb:MN996531 | Organism:Severe | ACCTATCCTTCTTTAGAAACTATACAAATTACCATTTTCATCTTTTAAATGGGATTTAACT | 7209 |
| gb:MT066176 | Organism:Severe | ACCTATCCTTCTTTAGAAACTATACAAATTACCATTTTCATCTTTTAAATGGGATTTAACT | 7222 |
| gb:MT027064 | Organism:Severe | ACCTATCCTTCTTTAGAAACTATACAAATTACCATTTTCATCTTTTAAATGGGATTTAACT | 7222 |
| gb:MN994468 | Organism:Severe | ACCTATCCTTCTTTAGAAACTATACAAATTACCATTTTCATCTTTTAAATGGGATTTAACT | 7222 |
| gb:MT072688 | Organism:Severe | ACCTATCCTTCTTTAGAAACTATACAAATTACCATTTTCATCTTTTAAATGGGATTTAACT | 7207 |
| gb:MN996527 | Organism:Severe | ACCTATCCTTCTTTAGAAACTATACAAATTACCATTTTCATCTTTTAAATGGGATTTAACT | 7189 |
| gb:MT093631 | Organism:Severe | ACCTATCCTTCTTTAGAAACTATACAAATTACCATTTTCATCTTTTAAATGGGATTTAACT | 7260 |
| gb:MT106053 | Organism:Severe | ACCTATCCTTCTTTAGAAACTATACAAATTACCATTTTCATCTTTTAAATGGGATTTAACT | 7222 |
| gb:MT019533 | Organism:Severe | ACCTATCCTTCTTTAGAAACTATACAAATTACCATTTTCATCTTTTAAATGGGATTTAACT | 7222 |
| gb:MT019531 | Organism:Severe | ACCTATCCTTCTTTAGAAACTATACAAATTACCATTTTCATCTTTTAAATGGGATTTAACT | 7222 |
| gb:MN996528 | Organism:Severe | ACCTATCCTTCTTTAGAAACTATACAAATTACCATTTTCATCTTTTAAATGGGATTTAACT | 7222 |
| gb:MN996530 | Organism:Severe | ACCTATCCTTCTTTAGAAACTATACAAATTACCATTTTCATCTTTTAAATGGGATTTAACT | 7208 |
| gb:MN908947 | Organism:Severe | ACCTATCCTTCTTTAGAAACTATACAAATTACCATTTTCATCTTTTAAATGGGATTTAACT | 7222 |
| gb:MT019532 | Organism:Severe | ACCTATCCTTCTTTAGAAACTATACAAATTACCATTTTCATCTTTTAAATGGGATTTAACT | 7222 |

\*\*\*\*\*

|             |                 |                                                              |      |
|-------------|-----------------|--------------------------------------------------------------|------|
| gb:MT020781 | Organism:Severe | GCTTTTGGCTTAGTTGCAGAGTGGTTTTTGGCATATATTCTTTTCACTAGGTTTTTCTAT | 7270 |
| gb:MT007544 | Organism:Severe | GCTTTTGGCTTAGTTGCAGAGTGGTTTTTGGCATATATTCTTTTCACTAGGTTTTTCTAT | 7282 |
| gb:MN994467 | Organism:Severe | GCTTTTGGCTTAGTTGCAGAGTGGTTTTTGGCATATATTCTTTTCACTAGGTTTTTCTAT | 7282 |
| gb:MT044257 | Organism:Severe | GCTTTTGGCTTAGTTGCAGAGTGGTTTTTGGCATATATTCTTTTCACTAGGTTTTTCTAT | 7282 |
| gb:MT106054 | Organism:Severe | GCTTTTGGCTTAGTTGCAGAGTGGTTTTTGGCATATATTCTTTTCACTAGGTTTTTCTAT | 7282 |
| gb:MT049951 | Organism:Severe | GCTTTTGGCTTAGTTGCAGAGTGGTTTTTGGCATATATTCTTTTCACTAGGTTTTTCTAT | 7282 |
| gb:MN975262 | Organism:Severe | GCTTTTGGCTTAGTTGCAGAGTGGTTTTTGGCATATATTCTTTTCACTAGGTTTTTCTAT | 7282 |
| gb:MT106052 | Organism:Severe | GCTTTTGGCTTAGTTGCAGAGTGGTTTTTGGCATATATTCTTTTCACTAGGTTTTTCTAT | 7282 |
| gb:LC522975 | Organism:Severe | GCTTTTGGCTTAGTTGCAGAGTGGTTTTTGGCATATATTCTTTTCACTAGGTTTTTCTAT | 7279 |
| gb:LC522973 | Organism:Severe | GCTTTTGGCTTAGTTGCAGAGTGGTTTTTGGCATATATTCTTTTCACTAGGTTTTTCTAT | 7279 |
| gb:LC522974 | Organism:Severe | GCTTTTGGCTTAGTTGCAGAGTGGTTTTTGGCATATATTCTTTTCACTAGGTTTTTCTAT | 7279 |
| gb:MN985325 | Organism:Severe | GCTTTTGGCTTAGTTGCAGAGTGGTTTTTGGCATATATTCTTTTCACTAGGTTTTTCTAT | 7282 |
| gb:MT020881 | Organism:Severe | GCTTTTGGCTTAGTTGCAGAGTGGTTTTTGGCATATATTCTTTTCACTAGGTTTTTCTAT | 7282 |
| gb:MT020880 | Organism:Severe | GCTTTTGGCTTAGTTGCAGAGTGGTTTTTGGCATATATTCTTTTCACTAGGTTTTTCTAT | 7282 |
| gb:MT066175 | Organism:Severe | GCTTTTGGCTTAGTTGCAGAGTGGTTTTTGGCATATATTCTTTTCACTAGGTTTTTCTAT | 7282 |
| gb:MN997409 | Organism:Severe | GCTTTTGGCTTAGTTGCAGAGTGGTTTTTGGCATATATTCTTTTCACTAGGTTTTTCTAT | 7282 |
| gb:MN938384 | Organism:Severe | GCTTTTGGCTTAGTTGCAGAGTGGTTTTTGGCATATATTCTTTTCACTAGGTTTTTCTAT | 7250 |
| gb:MT044258 | Organism:Severe | GCTTTTGGCTTAGTTGCAGAGTGGTTTTTGGCATATATTCTTTTCACTAGGTTTTTCTAT | 7258 |
| gb:MT039890 | Organism:Severe | GCTTTTGGCTTAGTTGCAGAGTGGTTTTTGGCATATATTCTTTTCACTAGGTTTTTCTAT | 7282 |
| gb:MN988713 | Organism:Severe | GCTTTTGGCTTAGTTGCAGAGTGGTTTTTGGCATATATTCTTTTCACTAGGTTTTTCTAT | 7282 |

|             |                 |                                                             |      |
|-------------|-----------------|-------------------------------------------------------------|------|
| gb:LC521925 | Organism:Severe | GCTTTTGGCTTAGTTGCAGAGTGGTTTTTGGCATATATTCTTTTACTAGGTTTTTCTAT | 7255 |
| gb:MT093571 | Organism:Severe | GCTTTTGGCTTAGTTGCAGAGTGGTTTTTGGCATATATTCTTTTACTAGGTTTTTCTAT | 7282 |
| gb:MT039887 | Organism:Severe | GCTTTTGGCTTAGTTGCAGAGTGGTTTTTGGCATATATTCTTTTACTAGGTTTTTCTAT | 7282 |
| gb:MT019530 | Organism:Severe | GCTTTTGGCTTAGTTGCAGAGTGGTTTTTGGCATATATTCTTTTACTAGGTTTTTCTAT | 7282 |
| gb:MT039888 | Organism:Severe | GCTTTTGGCTTAGTTGCAGAGTGGTTTTTGGCATATATTCTTTTACTAGGTTTTTCTAT | 7282 |
| gb:LC522972 | Organism:Severe | GCTTTTGGCTTAGTTGCAGAGTGGTTTTTGGCATATATTCTTTTACTAGGTTTTTCTAT | 7279 |
| gb:MT027063 | Organism:Severe | GCTTTTGGCTTAGTTGCAGAGTGGTTTTTGGCATATATTCTTTTACTAGGTTTTTCTAT | 7282 |
| gb:MT027062 | Organism:Severe | GCTTTTGGCTTAGTTGCAGAGTGGTTTTTGGCATATATTCTTTTACTAGGTTTTTCTAT | 7282 |
| gb:MT019529 | Organism:Severe | GCTTTTGGCTTAGTTGCAGAGTGGTTTTTGGCATATATTCTTTTACTAGGTTTTTCTAT | 7282 |
| gb:MN996529 | Organism:Severe | GCTTTTGGCTTAGTTGCAGAGTGGTTTTTGGCATATATTCTTTTACTAGGTTTTTCTAT | 7270 |
| gb:MN996531 | Organism:Severe | GCTTTTGGCTTAGTTGCAGAGTGGTTTTTGGCATATATTCTTTTACTAGGTTTTTCTAT | 7269 |
| gb:MT066176 | Organism:Severe | GCTTTTGGCTTAGTTGCAGAGTGGTTTTTGGCATATATTCTTTTACTAGGTTTTTCTAT | 7282 |
| gb:MT027064 | Organism:Severe | GCTTTTGGCTTAGTTGCAGAGTGGTTTTTGGCATATATTCTTTTACTAGGTTTTTCTAT | 7282 |
| gb:MN994468 | Organism:Severe | GCTTTTGGCTTAGTTGCAGAGTGGTTTTTGGCATATATTCTTTTACTAGGTTTTTCTAT | 7282 |
| gb:MT072688 | Organism:Severe | GCTTTTGGCTTAGTTGCAGAGTGGTTTTTGGCATATATTCTTTTACTAGGTTTTTCTAT | 7267 |
| gb:MN996527 | Organism:Severe | GCTTTTGGCTTAGTTGCAGAGTGGTTTTTGGCATATATTCTTTTACTAGGTTTTTCTAT | 7249 |
| gb:MT093631 | Organism:Severe | GCTTTTGGCTTAGTTGCAGAGTGGTTTTTGGCATATATTCTTTTACTAGGTTTTTCTAT | 7320 |
| gb:MT106053 | Organism:Severe | GCTTTTGGCTTAGTTGCAGAGTGGTTTTTGGCATATATTCTTTTACTAGGTTTTTCTAT | 7282 |
| gb:MT019533 | Organism:Severe | GCTTTTGGCTTAGTTGCAGAGTGGTTTTTGGCATATATTCTTTTACTAGGTTTTTCTAT | 7282 |
| gb:MT019531 | Organism:Severe | GCTTTTGGCTTAGTTGCAGAGTGGTTTTTGGCATATATTCTTTTACTAGGTTTTTCTAT | 7282 |
| gb:MN996528 | Organism:Severe | GCTTTTGGCTTAGTTGCAGAGTGGTTTTTGGCATATATTCTTTTACTAGGTTTTTCTAT | 7282 |
| gb:MN996530 | Organism:Severe | GCTTTTGGCTTAGTTGCAGAGTGGTTTTTGGCATATATTCTTTTACTAGGTTTTTCTAT | 7268 |
| gb:MN908947 | Organism:Severe | GCTTTTGGCTTAGTTGCAGAGTGGTTTTTGGCATATATTCTTTTACTAGGTTTTTCTAT | 7282 |
| gb:MT019532 | Organism:Severe | GCTTTTGGCTTAGTTGCAGAGTGGTTTTTGGCATATATTCTTTTACTAGGTTTTTCTAT | 7282 |

\*\*\*\*\*

|             |                 |                                                              |      |
|-------------|-----------------|--------------------------------------------------------------|------|
| gb:MT020781 | Organism:Severe | GTACTTGGATTGGCTGCAATCATGCAATTGTTTTTCAGCTATTTTGCAGTACATTTTATT | 7330 |
| gb:MT007544 | Organism:Severe | GTACTTGGATTGGCTGCAATCATGCAATTGTTTTTCAGCTATTTTGCAGTACATTTTATT | 7342 |
| gb:MN994467 | Organism:Severe | GTACTTGGATTGGCTGCAATCATGCAATTGTTTTTCAGCTATTTTGCAGTACATTTTATT | 7342 |
| gb:MT044257 | Organism:Severe | GTACTTGGATTGGCTGCAATCATGCAATTGTTTTTCAGCTATTTTGCAGTACATTTTATT | 7342 |
| gb:MT106054 | Organism:Severe | GTACTTGGATTGGCTGCAATCATGCAATTGTTTTTCAGCTATTTTGCAGTACATTTTATT | 7342 |
| gb:MT049951 | Organism:Severe | GTACTTGGATTGGCTGCAATCATGCAATTGTTTTTCAGCTATTTTGCAGTACATTTTATT | 7342 |
| gb:MN975262 | Organism:Severe | GTACTTGGATTGGCTGCAATCATGCAATTGTTTTTCAGCTATTTTGCAGTACATTTTATT | 7342 |
| gb:MT106052 | Organism:Severe | GTACTTGGATTGGCTGCAATCATGCAATTGTTTTTCAGCTATTTTGCAGTACATTTTATT | 7342 |
| gb:LC522975 | Organism:Severe | GTACTTGGATTGGCTGCAATCATGCAATTGTTTTTCAGCTATTTTGCAGTACATTTTATT | 7339 |
| gb:LC522973 | Organism:Severe | GTACTTGGATTGGCTGCAATCATGCAATTGTTTTTCAGCTATTTTGCAGTACATTTTATT | 7339 |
| gb:LC522974 | Organism:Severe | GTACTTGGATTGGCTGCAATCATGCAATTGTTTTTCAGCTATTTTGCAGTACATTTTATT | 7339 |
| gb:MN985325 | Organism:Severe | GTACTTGGATTGGCTGCAATCATGCAATTGTTTTTCAGCTATTTTGCAGTACATTTTATT | 7342 |
| gb:MT020881 | Organism:Severe | GTACTTGGATTGGCTGCAATCATGCAATTGTTTTTCAGCTATTTTGCAGTACATTTTATT | 7342 |
| gb:MT020880 | Organism:Severe | GTACTTGGATTGGCTGCAATCATGCAATTGTTTTTCAGCTATTTTGCAGTACATTTTATT | 7342 |
| gb:MT066175 | Organism:Severe | GTACTTGGATTGGCTGCAATCATGCAATTGTTTTTCAGCTATTTTGCAGTACATTTTATT | 7342 |
| gb:MN997409 | Organism:Severe | GTACTTGGATTGGCTGCAATCATGCAATTGTTTTTCAGCTATTTTGCAGTACATTTTATT | 7342 |
| gb:MN938384 | Organism:Severe | GTACTTGGATTGGCTGCAATCATGCAATTGTTTTTCAGCTATTTTGCAGTACATTTTATT | 7310 |
| gb:MT044258 | Organism:Severe | GTACTTGGATTGGCTGCAATCATGCAATTGTTTTTCAGCTATTTTGCAGTACATTTTATT | 7318 |
| gb:MT039890 | Organism:Severe | GTACTTGGATTGGCTGCAATCATGCAATTGTTTTTCAGCTATTTTGCAGTACATTTTATT | 7342 |
| gb:MN988713 | Organism:Severe | GTACTTGGATTGGCTGCAATCATGCAATTGTTTTTCAGCTATTTTGCAGTACATTTTATT | 7342 |
| gb:LC521925 | Organism:Severe | GTACTTGGATTGGCTGCAATCATGCAATTGTTTTTCAGCTATTTTGCAGTACATTTTATT | 7315 |
| gb:MT093571 | Organism:Severe | GTACTTGGATTGGCTGCAATCATGCAATTGTTTTTCAGCTATTTTGCAGTACATTTTATT | 7342 |
| gb:MT039887 | Organism:Severe | GTACTTGGATTGGCTGCAATCATGCAATTGTTTTTCAGCTATTTTGCAGTACATTTTATT | 7342 |
| gb:MT019530 | Organism:Severe | GTACTTGGATTGGCTGCAATCATGCAATTGTTTTTCAGCTATTTTGCAGTACATTTTATT | 7342 |
| gb:MT039888 | Organism:Severe | GTACTTGGATTGGCTGCAATCATGCAATTGTTTTTCAGCTATTTTGCAGTACATTTTATT | 7342 |
| gb:LC522972 | Organism:Severe | GTACTTGGATTGGCTGCAATCATGCAATTGTTTTTCAGCTATTTTGCAGTACATTTTATT | 7339 |
| gb:MT027063 | Organism:Severe | GTACTTGGATTGGCTGCAATCATGCAATTGTTTTTCAGCTATTTTGCAGTACATTTTATT | 7342 |
| gb:MT027062 | Organism:Severe | GTACTTGGATTGGCTGCAATCATGCAATTGTTTTTCAGCTATTTTGCAGTACATTTTATT | 7342 |
| gb:MT019529 | Organism:Severe | GTACTTGGATTGGCTGCAATCATGCAATTGTTTTTCAGCTATTTTGCAGTACATTTTATT | 7342 |
| gb:MN996529 | Organism:Severe | GTACTTGGATTGGCTGCAATCATGCAATTGTTTTTCAGCTATTTTGCAGTACATTTTATT | 7330 |
| gb:MN996531 | Organism:Severe | GTACTTGGATTGGCTGCAATCATGCAATTGTTTTTCAGCTATTTTGCAGTACATTTTATT | 7329 |
| gb:MT066176 | Organism:Severe | GTACTTGGATTGGCTGCAATCATGCAATTGTTTTTCAGCTATTTTGCAGTACATTTTATT | 7342 |
| gb:MT027064 | Organism:Severe | GTACTTGGATTGGCTGCAATCATGCAATTGTTTTTCAGCTATTTTGCAGTACATTTTATT | 7342 |
| gb:MN994468 | Organism:Severe | GTACTTGGATTGGCTGCAATCATGCAATTGTTTTTCAGCTATTTTGCAGTACATTTTATT | 7342 |
| gb:MT072688 | Organism:Severe | GTACTTGGATTGGCTGCAATCATGCAATTGTTTTTCAGCTATTTTGCAGTACATTTTATT | 7327 |
| gb:MN996527 | Organism:Severe | GTACTTGGATTGGCTGCAATCATGCAATTGTTTTTCAGCTATTTTGCAGTACATTTTATT | 7309 |
| gb:MT093631 | Organism:Severe | GTACTTGGATTGGCTGCAATCATGCAATTGTTTTTCAGCTATTTTGCAGTACATTTTATT | 7380 |
| gb:MT106053 | Organism:Severe | GTACTTGGATTGGCTGCAATCATGCAATTGTTTTTCAGCTATTTTGCAGTACATTTTATT | 7342 |
| gb:MT019533 | Organism:Severe | GTACTTGGATTGGCTGCAATCATGCAATTGTTTTTCAGCTATTTTGCAGTACATTTTATT | 7342 |



|             |                 |                                                              |      |
|-------------|-----------------|--------------------------------------------------------------|------|
| gb:MT019531 | Organism:Severe | GTACTTGGATTGGCTGCAATCATGCAATTGTTTTTCAGCTATTTTGCAGTACATTTTATT | 7342 |
| gb:MN996528 | Organism:Severe | GTACTTGGATTGGCTGCAATCATGCAATTGTTTTTCAGCTATTTTGCAGTACATTTTATT | 7342 |
| gb:MN996530 | Organism:Severe | GTACTTGGATTGGCTGCAATCATGCAATTGTTTTTCAGCTATTTTGCAGTACATTTTATT | 7328 |
| gb:MN908947 | Organism:Severe | GTACTTGGATTGGCTGCAATCATGCAATTGTTTTTCAGCTATTTTGCAGTACATTTTATT | 7342 |
| gb:MT019532 | Organism:Severe | GTACTTGGATTGGCTGCAATCATGCAATTGTTTTTCAGCTATTTTGCAGTACATTTTATT | 7342 |

\*\*\*\*\*

|             |                 |                                                               |      |
|-------------|-----------------|---------------------------------------------------------------|------|
| gb:MT020781 | Organism:Severe | AGTAATTCCTGGCTTATGTGGTTAATANNNNNNNNNNNNAATGGCCCCGATTTTCAGCT   | 7390 |
| gb:MT007544 | Organism:Severe | AGTAATTCCTGGCTTATGTGGTTAATAATTAATCTTGTACAAATGGCCCCGATTTTCAGCT | 7402 |
| gb:MN994467 | Organism:Severe | AGTAATTCCTGGCTTATGTGGTTAATAATTAATCTTGTACAAATGGCCCCGATTTTCAGCT | 7402 |
| gb:MT044257 | Organism:Severe | AGTAATTCCTGGCTTATGTGGTTAATAATTAATCTTGTACAAATGGCCCCGATTTTCAGCT | 7402 |
| gb:MT106054 | Organism:Severe | AGTAATTCCTGGCTTATGTGGTTAATAATTAATCTTGTACAAATGGCCCCGATTTTCAGCT | 7402 |
| gb:MT049951 | Organism:Severe | AGTAATTCCTGGCTTATGTGGTTAATAATTAATCTTGTACAAATGGCCCCGATTTTCAGCT | 7402 |
| gb:MN975262 | Organism:Severe | AGTAATTCCTGGCTTATGTGGTTAATAATTAATCTTGTACAAATGGCCCCGATTTTCAGCT | 7402 |
| gb:MT106052 | Organism:Severe | AGTAATTCCTGGCTTATGTGGTTAATAATTAATCTTGTACAAATGGCCCCGATTTTCAGCT | 7402 |
| gb:LC522975 | Organism:Severe | AGTAATTCCTGGCTTATGTGGTTAATAATTAATCTTGTACAAATGGCCCCGATTTTCAGCT | 7399 |
| gb:LC522973 | Organism:Severe | AGTAATTCCTGGCTTATGTGGTTAATAATTAATCTTGTACAAATGGCCCCGATTTTCAGCT | 7399 |
| gb:LC522974 | Organism:Severe | AGTAATTCCTGGCTTATGTGGTTAATAATTAATCTTGTACAAATGGCCCCGATTTTCAGCT | 7399 |
| gb:MN985325 | Organism:Severe | AGTAATTCCTGGCTTATGTGGTTAATAATTAATCTTGTACAAATGGCCCCGATTTTCAGCT | 7402 |
| gb:MT020881 | Organism:Severe | AGTAATTCCTGGCTTATGTGGTTAATAATTAATCTTGTACAAATGGCCCCGATTTTCAGCT | 7402 |
| gb:MT020880 | Organism:Severe | AGTAATTCCTGGCTTATGTGGTTAATAATTAATCTTGTACAAATGGCCCCGATTTTCAGCT | 7402 |
| gb:MT066175 | Organism:Severe | AGTAATTCCTGGCTTATGTGGTTAATAATTAATCTTGTACAAATGGCCCCGATTTTCAGCT | 7402 |
| gb:MN997409 | Organism:Severe | AGTAATTCCTGGCTTATGTGGTTAATAATTAATCTTGTACAAATGGCCCCGATTTTCAGCT | 7402 |
| gb:MN938384 | Organism:Severe | AGTAATTCCTGGCTTATGTGGTTAATAATTAATCTTGTACAAATGGCCCCGATTTTCAGCT | 7370 |
| gb:MT044258 | Organism:Severe | AGTAATTCCTGGCTTATGTGGTTAATAATTAATCTTGTACAAATGGCCCCGATTTTCAGCT | 7378 |
| gb:MT039890 | Organism:Severe | AGTAATTCCTGGCTTATGTGGTTAATAATTAATCTTGTACAAATGGCCCCGATTTTCAGCT | 7402 |
| gb:MN988713 | Organism:Severe | AGTAATTCCTGGCTTATGTGGTTAATAATTAATCTTGTACAAATGGCCCCGATTTTCAGCT | 7402 |
| gb:LC521925 | Organism:Severe | AGTAATTCCTGGCTTATGTGGTTAATAATTAATCTTGTACAAATGGCCCCGATTTTCAGCT | 7375 |
| gb:MT093571 | Organism:Severe | AGTAATTCCTGGCTTATGTGGTTAATAATTAATCTTGTACAAATGGCCCCGATTTTCAGCT | 7402 |
| gb:MT039887 | Organism:Severe | AGTAATTCCTGGCTTATGTGGTTAATAATTAATCTTGTACAAATGGCCCCGATTTTCAGCT | 7402 |
| gb:MT019530 | Organism:Severe | AGTAATTCCTGGCTTATGTGGTTAATAATTAATCTTGTACAAATGGCCCCGATTTTCAGCT | 7402 |
| gb:MT039888 | Organism:Severe | AGTAATTCCTGGCTTATGTGGTTAATAATTAATCTTGTACAAATGGCCCCGATTTTCAGCT | 7402 |
| gb:LC522972 | Organism:Severe | AGTAATTCCTGGCTTATGTGGTTAATAATTAATCTTGTACAAATGGCCCCGATTTTCAGCT | 7399 |
| gb:MT027063 | Organism:Severe | AGTAATTCCTGGCTTATGTGGTTAATAATTAATCTTGTACAAATGGCCCCGATTTTCAGCT | 7402 |
| gb:MT027062 | Organism:Severe | AGTAATTCCTGGCTTATGTGGTTAATAATTAATCTTGTACAAATGGCCCCGATTTTCAGCT | 7402 |
| gb:MT019529 | Organism:Severe | AGTAATTCCTGGCTTATGTGGTTAATAATTAATCTTGTACAAATGGCCCCGATTTTCAGCT | 7402 |
| gb:MN996529 | Organism:Severe | AGTAATTCCTGGCTTATGTGGTTAATAATTAATCTTGTACAAATGGCCCCGATTTTCAGCT | 7390 |
| gb:MN996531 | Organism:Severe | AGTAATTCCTGGCTTATGTGGTTAATAATTAATCTTGTACAAATGGCCCCGATTTTCAGCT | 7389 |
| gb:MT066176 | Organism:Severe | AGTAATTCCTGGCTTATGTGGTTAATAATTAATCTTGTACAAATGGCCCCGATTTTCAGCT | 7402 |
| gb:MT027064 | Organism:Severe | AGTAATTCCTGGCTTATGTGGTTAATAATTAATCTTGTACAAATGGCCCCGATTTTCAGCT | 7402 |
| gb:MN994468 | Organism:Severe | AGTAATTCCTGGCTTATGTGGTTAATAATTAATCTTGTACAAATGGCCCCGATTTTCAGCT | 7402 |
| gb:MT072688 | Organism:Severe | AGTAATTCCTGGCTTATGTGGTTAATAATTAATCTTGTACAAATGGCCCCGATTTTCAGCT | 7387 |
| gb:MN996527 | Organism:Severe | AGTAATTCCTGGCTTATGTGGTTAATAATTAATCTTGTACAAATGGCCCCGATTTTCAGCT | 7369 |
| gb:MT093631 | Organism:Severe | AGTAATTCCTGGCTTATGTGGTTAATAATTAATCTTGTACAAATGGCCCCGATTTTCAGCT | 7440 |
| gb:MT106053 | Organism:Severe | AGTAATTCCTGGCTTATGTGGTTAATAATTAATCTTGTACAAATGGCCCCGATTTTCAGCT | 7402 |
| gb:MT019533 | Organism:Severe | AGTAATTCCTGGCTTATGTGGTTAATAATTAATCTTGTACAAATGGCCCCGATTTTCAGCT | 7402 |
| gb:MT019531 | Organism:Severe | AGTAATTCCTGGCTTATGTGGTTAATAATTAATCTTGTACAAATGGCCCCGATTTTCAGCT | 7402 |
| gb:MN996528 | Organism:Severe | AGTAATTCCTGGCTTATGTGGTTAATAATTAATCTTGTACAAATGGCCCCGATTTTCAGCT | 7402 |
| gb:MN996530 | Organism:Severe | AGTAATTCCTGGCTTATGTGGTTAATAATTAATCTTGTACAAATGGCCCCGATTTTCAGCT | 7388 |
| gb:MN908947 | Organism:Severe | AGTAATTCCTGGCTTATGTGGTTAATAATTAATCTTGTACAAATGGCCCCGATTTTCAGCT | 7402 |
| gb:MT019532 | Organism:Severe | AGTAATTCCTGGCTTATGTGGTTAATAATTAATCTTGTACAAATGGCCCCGATTTTCAGCT | 7402 |

\*\*\*\*\*

|             |                 |                                                            |      |
|-------------|-----------------|------------------------------------------------------------|------|
| gb:MT020781 | Organism:Severe | ATGGTTAGAATGTACATCTTCTTTCATCATTATTTATGTATGGAAAAGTTATGTGCAT | 7450 |
| gb:MT007544 | Organism:Severe | ATGGTTAGAATGTACATCTTCTTTCATCATTATTTATGTATGGAAAAGTTATGTGCAT | 7462 |
| gb:MN994467 | Organism:Severe | ATGGTTAGAATGTACATCTTCTTTCATCATTATTTATGTATGGAAAAGTTATGTGCAT | 7462 |
| gb:MT044257 | Organism:Severe | ATGGTTAGAATGTACATCTTCTTTCATCATTATTTATGTATGGAAAAGTTATGTGCAT | 7462 |
| gb:MT106054 | Organism:Severe | ATGGTTAGAATGTACATCTTCTTTCATCATTATTTATGTATGGAAAAGTTATGTGCAT | 7462 |
| gb:MT049951 | Organism:Severe | ATGGTTAGAATGTACATCTTCTTTCATCATTATTTATGTATGGAAAAGTTATGTGCAT | 7462 |
| gb:MN975262 | Organism:Severe | ATGGTTAGAATGTACATCTTCTTTCATCATTATTTATGTATGGAAAAGTTATGTGCAT | 7462 |
| gb:MT106052 | Organism:Severe | ATGGTTAGAATGTACATCTTCTTTCATCATTATTTATGTATGGAAAAGTTATGTGCAT | 7462 |
| gb:LC522975 | Organism:Severe | ATGGTTAGAATGTACATCTTCTTTCATCATTATTTATGTATGGAAAAGTTATGTGCAT | 7459 |
| gb:LC522973 | Organism:Severe | ATGGTTAGAATGTACATCTTCTTTCATCATTATTTATGTATGGAAAAGTTATGTGCAT | 7459 |
| gb:LC522974 | Organism:Severe | ATGGTTAGAATGTACATCTTCTTTCATCATTATTTATGTATGGAAAAGTTATGTGCAT | 7459 |
| gb:MN985325 | Organism:Severe | ATGGTTAGAATGTACATCTTCTTTCATCATTATTTATGTATGGAAAAGTTATGTGCAT | 7462 |

|             |                 |                                                              |      |
|-------------|-----------------|--------------------------------------------------------------|------|
| gb:MT020881 | Organism:Severe | ATGGTTAGAATGTACATCTTCTTTGCATCATTTTATTATGTATGGAAAAGTTATGTGCAT | 7462 |
| gb:MT020880 | Organism:Severe | ATGGTTAGAATGTACATCTTCTTTGCATCATTTTATTATGTATGGAAAAGTTATGTGCAT | 7462 |
| gb:MT066175 | Organism:Severe | ATGGTTAGAATGTACATCTTCTTTGCATCATTTTATTATGTATGGAAAAGTTATGTGCAT | 7462 |
| gb:MN997409 | Organism:Severe | ATGGTTAGAATGTACATCTTCTTTGCATCATTTTATTATGTATGGAAAAGTTATGTGCAT | 7462 |
| gb:MN938384 | Organism:Severe | ATGGTTAGAATGTACATCTTCTTTGCATCATTTTATTATGTATGGAAAAGTTATGTGCAT | 7430 |
| gb:MT044258 | Organism:Severe | ATGGTTAGAATGTACATCTTCTTTGCATCATTTTATTATGTATGGAAAAGTTATGTGCAT | 7438 |
| gb:MT039890 | Organism:Severe | ATGGTTAGAATGTACATCTTCTTTGCATCATTTTATTATGTATGGAAAAGTTATGTGCAT | 7462 |
| gb:MN988713 | Organism:Severe | ATGGTTAGAATGTACATCTTCTTTGCATCATTTTATTATGTATGGAAAAGTTATGTGCAT | 7462 |
| gb:LC521925 | Organism:Severe | ATGGTTAGAATGTACATCTTCTTTGCATCATTTTATTATGTATGGAAAAGTTATGTGCAT | 7435 |
| gb:MT093571 | Organism:Severe | ATGGTTAGAATGTACATCTTCTTTGCATCATTTTATTATGTATGGAAAAGTTATGTGCAT | 7462 |
| gb:MT039887 | Organism:Severe | ATGGTTAGAATGTACATCTTCTTTGCATCATTTTATTATGTATGGAAAAGTTATGTGCAT | 7462 |
| gb:MT019530 | Organism:Severe | ATGGTTAGAATGTACATCTTCTTTGCATCATTTTATTATGTATGGAAAAGTTATGTGCAT | 7462 |
| gb:MT039888 | Organism:Severe | ATGGTTAGAATGTACATCTTCTTTGCATCATTTTATTATGTATGGAAAAGTTATGTGCAT | 7462 |
| gb:LC522972 | Organism:Severe | ATGGTTAGAATGTACATCTTCTTTGCATCATTTTATTATGTATGGAAAAGTTATGTGCAT | 7459 |
| gb:MT027063 | Organism:Severe | ATGGTTAGAATGTACATCTTCTTTGCATCATTTTATTATGTATGGAAAAGTTATGTGCAT | 7462 |
| gb:MT027062 | Organism:Severe | ATGGTTAGAATGTACATCTTCTTTGCATCATTTTATTATGTATGGAAAAGTTATGTGCAT | 7462 |
| gb:MT019529 | Organism:Severe | ATGGTTAGAATGTACATCTTCTTTGCATCATTTTATTATGTATGGAAAAGTTATGTGCAT | 7462 |
| gb:MN996529 | Organism:Severe | ATGGTTAGAATGTACATCTTCTTTGCATCATTTTATTATGTATGGAAAAGTTATGTGCAT | 7450 |
| gb:MN996531 | Organism:Severe | ATGGTTAGAATGTACATCTTCTTTGCATCATTTTATTATGTATGGAAAAGTTATGTGCAT | 7449 |
| gb:MT066176 | Organism:Severe | ATGGTTAGAATGTACATCTTCTTTGCATCATTTTATTATGTATGGAAAAGTTATGTGCAT | 7462 |
| gb:MT027064 | Organism:Severe | ATGGTTAGAATGTACATCTTCTTTGCATCATTTTATTATGTATGGAAAAGTTATGTGCAT | 7462 |
| gb:MN994468 | Organism:Severe | ATGGTTAGAATGTACATCTTCTTTGCATCATTTTATTATGTATGGAAAAGTTATGTGCAT | 7462 |
| gb:MT072688 | Organism:Severe | ATGGTTAGAATGTACATCTTCTTTGCATCATTTTATTATGTATGGAAAAGTTATGTGCAT | 7447 |
| gb:MN996527 | Organism:Severe | ATGGTTAGAATGTACATCTTCTTTGCATCATTTTATTATGTATGGAAAAGTTATGTGCAT | 7429 |
| gb:MT093631 | Organism:Severe | ATGGTTAGAATGTACATCTTCTTTGCATCATTTTATTATGTATGGAAAAGTTATGTGCAT | 7500 |
| gb:MT106053 | Organism:Severe | ATGGTTAGAATGTACATCTTCTTTGCATCATTTTATTATGTATGGAAAAGTTATGTGCAT | 7462 |
| gb:MT019533 | Organism:Severe | ATGGTTAGAATGTACATCTTCTTTGCATCATTTTATTATGTATGGAAAAGTTATGTGCAT | 7462 |
| gb:MT019531 | Organism:Severe | ATGGTTAGAATGTACATCTTCTTTGCATCATTTTATTATGTATGGAAAAGTTATGTGCAT | 7462 |
| gb:MN996528 | Organism:Severe | ATGGTTAGAATGTACATCTTCTTTGCATCATTTTATTATGTATGGAAAAGTTATGTGCAT | 7462 |
| gb:MN996530 | Organism:Severe | ATGGTTAGAATGTACATCTTCTTTGCATCATTTTATTATGTATGGAAAAGTTATGTGCAT | 7448 |
| gb:MN908947 | Organism:Severe | ATGGTTAGAATGTACATCTTCTTTGCATCATTTTATTATGTATGGAAAAGTTATGTGCAT | 7462 |
| gb:MT019532 | Organism:Severe | ATGGTTAGAATGTACATCTTCTTTGCATCATTTTATTATGTATGGAAAAGTTATGTGCAT | 7462 |

\*\*\*\*\*

|             |                 |                                                             |      |
|-------------|-----------------|-------------------------------------------------------------|------|
| gb:MT020781 | Organism:Severe | GTTGTAGACGTTGTAATTCATCAACTTGTATGATGTGTTACAAACGTAATAGAGCAACA | 7510 |
| gb:MT007544 | Organism:Severe | GTTGTAGACGTTGTAATTCATCAACTTGTATGATGTGTTACAAACGTAATAGAGCAACA | 7522 |
| gb:MN994467 | Organism:Severe | GTTGTAGACGTTGTAATTCATCAACTTGTATGATGTGTTACAAACGTAATAGAGCAACA | 7522 |
| gb:MT044257 | Organism:Severe | GTTGTAGACGTTGTAATTCATCAACTTGTATGATGTGTTACAAACGTAATAGAGCAACA | 7522 |
| gb:MT106054 | Organism:Severe | GTTGTAGACGTTGTAATTCATCAACTTGTATGATGTGTTACAAACGTAATAGAGCAACA | 7522 |
| gb:MT049951 | Organism:Severe | GTTGTAGACGTTGTAATTCATCAACTTGTATGATGTGTTACAAACGTAATAGAGCAACA | 7522 |
| gb:MN975262 | Organism:Severe | GTTGTAGACGTTGTAATTCATCAACTTGTATGATGTGTTACAAACGTAATAGAGCAACA | 7522 |
| gb:MT106052 | Organism:Severe | GTTGTAGACGTTGTAATTCATCAACTTGTATGATGTGTTACAAACGTAATAGAGCAACA | 7522 |
| gb:LC522975 | Organism:Severe | GTTGTAGACGTTGTAATTCATCAACTTGTATGATGTGTTACAAACGTAATAGAGCAACA | 7519 |
| gb:LC522973 | Organism:Severe | GTTGTAGACGTTGTAATTCATCAACTTGTATGATGTGTTACAAACGTAATAGAGCAACA | 7519 |
| gb:LC522974 | Organism:Severe | GTTGTAGACGTTGTAATTCATCAACTTGTATGATGTGTTACAAACGTAATAGAGCAACA | 7519 |
| gb:MN985325 | Organism:Severe | GTTGTAGACGTTGTAATTCATCAACTTGTATGATGTGTTACAAACGTAATAGAGCAACA | 7522 |
| gb:MT020881 | Organism:Severe | GTTGTAGACGTTGTAATTCATCAACTTGTATGATGTGTTACAAACGTAATAGAGCAACA | 7522 |
| gb:MT020880 | Organism:Severe | GTTGTAGACGTTGTAATTCATCAACTTGTATGATGTGTTACAAACGTAATAGAGCAACA | 7522 |
| gb:MT066175 | Organism:Severe | GTTGTAGACGTTGTAATTCATCAACTTGTATGATGTGTTACAAACGTAATAGAGCAACA | 7522 |
| gb:MN997409 | Organism:Severe | GTTGTAGACGTTGTAATTCATCAACTTGTATGATGTGTTACAAACGTAATAGAGCAACA | 7522 |
| gb:MN938384 | Organism:Severe | GTTGTAGACGTTGTAATTCATCAACTTGTATGATGTGTTACAAACGTAATAGAGCAACA | 7490 |
| gb:MT044258 | Organism:Severe | GTTGTAGACGTTGTAATTCATCAACTTGTATGATGTGTTACAAACGTAATAGAGCAACA | 7498 |
| gb:MT039890 | Organism:Severe | GTTGTAGACGTTGTAATTCATCAACTTGTATGATGTGTTACAAACGTAATAGAGCAACA | 7522 |
| gb:MN988713 | Organism:Severe | GTTGTAGACGTTGTAATTCATCAACTTGTATGATGTGTTACAAACGTAATAGAGCAACA | 7522 |
| gb:LC521925 | Organism:Severe | GTTGTAGACGTTGTAATTCATCAACTTGTATGATGTGTTACAAACGTAATAGAGCAACA | 7495 |
| gb:MT093571 | Organism:Severe | GTTGTAGACGTTGTAATTCATCAACTTGTATGATGTGTTACAAACGTAATAGAGCAACA | 7522 |
| gb:MT039887 | Organism:Severe | GTTGTAGACGTTGTAATTCATCAACTTGTATGATGTGTTACAAACGTAATAGAGCAACA | 7522 |
| gb:MT019530 | Organism:Severe | GTTGTAGACGTTGTAATTCATCAACTTGTATGATGTGTTACAAACGTAATAGAGCAACA | 7522 |
| gb:MT039888 | Organism:Severe | GTTGTAGACGTTGTAATTCATCAACTTGTATGATGTGTTACAAACGTAATAGAGCAACA | 7522 |
| gb:LC522972 | Organism:Severe | GTTGTAGACGTTGTAATTCATCAACTTGTATGATGTGTTACAAACGTAATAGAGCAACA | 7519 |
| gb:MT027063 | Organism:Severe | GTTGTAGACGTTGTAATTCATCAACTTGTATGATGTGTTACAAACGTAATAGAGCAACA | 7522 |
| gb:MT027062 | Organism:Severe | GTTGTAGACGTTGTAATTCATCAACTTGTATGATGTGTTACAAACGTAATAGAGCAACA | 7522 |
| gb:MT019529 | Organism:Severe | GTTGTAGACGTTGTAATTCATCAACTTGTATGATGTGTTACAAACGTAATAGAGCAACA | 7522 |
| gb:MN996529 | Organism:Severe | GTTGTAGACGTTGTAATTCATCAACTTGTATGATGTGTTACAAACGTAATAGAGCAACA | 7510 |
| gb:MN996531 | Organism:Severe | GTTGTAGACGTTGTAATTCATCAACTTGTATGATGTGTTACAAACGTAATAGAGCAACA | 7509 |

|             |                 |                                                             |      |
|-------------|-----------------|-------------------------------------------------------------|------|
| gb:MT066176 | Organism:Severe | GTTGTAGACGTTGTAATTCATCAACTTGTATGATGTGTTACAAACGTAATAGAGCAACA | 7522 |
| gb:MT027064 | Organism:Severe | GTTGTAGACGTTGTAATTCATCAACTTGTATGATGTGTTACAAACGTAATAGAGCAACA | 7522 |
| gb:MN994468 | Organism:Severe | GTTGTAGACGTTGTAATTCATCAACTTGTATGATGTGTTACAAACGTAATAGAGCAACA | 7522 |
| gb:MT072688 | Organism:Severe | GTTGTAGACGTTGTAATTCATCAACTTGTATGATGTGTTACAAACGTAATAGAGCAACA | 7507 |
| gb:MN996527 | Organism:Severe | GTTGTAGACGTTGTAATTCATCAACTTGTATGATGTGTTACAAACGTAATAGAGCAACA | 7489 |
| gb:MT093631 | Organism:Severe | GTTGTAGACGTTGTAATTCATCAACTTGTATGATGTGTTACAAACGTAATAGAGCAACA | 7560 |
| gb:MT106053 | Organism:Severe | GTTGTAGACGTTGTAATTCATCAACTTGTATGATGTGTTACAAACGTAATAGAGCAACA | 7522 |
| gb:MT019533 | Organism:Severe | GTTGTAGACGTTGTAATTCATCAACTTGTATGATGTGTTACAAACGTAATAGAGCAACA | 7522 |
| gb:MT019531 | Organism:Severe | GTTGTAGACGTTGTAATTCATCAACTTGTATGATGTGTTACAAACGTAATAGAGCAACA | 7522 |
| gb:MN996528 | Organism:Severe | GTTGTAGACGTTGTAATTCATCAACTTGTATGATGTGTTACAAACGTAATAGAGCAACA | 7522 |
| gb:MN996530 | Organism:Severe | GTTGTAGACGTTGTAATTCATCAACTTGTATGATGTGTTACAAACGTAATAGAGCAACA | 7508 |
| gb:MN908947 | Organism:Severe | GTTGTAGACGTTGTAATTCATCAACTTGTATGATGTGTTACAAACGTAATAGAGCAACA | 7522 |
| gb:MT019532 | Organism:Severe | GTTGTAGACGTTGTAATTCATCAACTTGTATGATGTGTTACAAACGTAATAGAGCAACA | 7522 |

\*\*\*\*\*

|             |                 |                                                               |      |
|-------------|-----------------|---------------------------------------------------------------|------|
| gb:MT020781 | Organism:Severe | AGAGTCGAATGTACAAC TATTGTTAATGGTGTTAGAAGGTCCTTTTATGTCTATGCTAAT | 7570 |
| gb:MT007544 | Organism:Severe | AGAGTCGAATGTACAAC TATTGTTAATGGTGTTAGAAGGTCCTTTTATGTCTATGCTAAT | 7582 |
| gb:MN994467 | Organism:Severe | AGAGTCGAATGTACAAC TATTGTTAATGGTGTTAGAAGGTCCTTTTATGTCTATGCTAAT | 7582 |
| gb:MT044257 | Organism:Severe | AGAGTCGAATGTACAAC TATTGTTAATGGTGTTAGAAGGTCCTTTTATGTCTATGCTAAT | 7582 |
| gb:MT106054 | Organism:Severe | AGAGTCGAATGTACAAC TATTGTTAATGGTGTTAGAAGGTCCTTTTATGTCTATGCTAAT | 7582 |
| gb:MT049951 | Organism:Severe | AGAGTCGAATGTACAAC TATTGTTAATGGTGTTAGAAGGTCCTTTTATGTCTATGCTAAT | 7582 |
| gb:MN975262 | Organism:Severe | AGAGTCGAATGTACAAC TATTGTTAATGGTGTTAGAAGGTCCTTTTATGTCTATGCTAAT | 7582 |
| gb:MT106052 | Organism:Severe | AGAGTCGAATGTACAAC TATTGTTAATGGTGTTAGAAGGTCCTTTTATGTCTATGCTAAT | 7582 |
| gb:LC522975 | Organism:Severe | AGAGTCGAATGTACAAC TATTGTTAATGGTGTTAGAAGGTCCTTTTATGTCTATGCTAAT | 7579 |
| gb:LC522973 | Organism:Severe | AGAGTCGAATGTACAAC TATTGTTAATGGTGTTAGAAGGTCCTTTTATGTCTATGCTAAT | 7579 |
| gb:LC522974 | Organism:Severe | AGAGTCGAATGTACAAC TATTGTTAATGGTGTTAGAAGGTCCTTTTATGTCTATGCTAAT | 7579 |
| gb:MN985325 | Organism:Severe | AGAGTCGAATGTACAAC TATTGTTAATGGTGTTAGAAGGTCCTTTTATGTCTATGCTAAT | 7582 |
| gb:MT020881 | Organism:Severe | AGAGTCGAATGTACAAC TATTGTTAATGGTGTTAGAAGGTCCTTTTATGTCTATGCTAAT | 7582 |
| gb:MT020880 | Organism:Severe | AGAGTCGAATGTACAAC TATTGTTAATGGTGTTAGAAGGTCCTTTTATGTCTATGCTAAT | 7582 |
| gb:MT066175 | Organism:Severe | AGAGTCGAATGTACAAC TATTGTTAATGGTGTTAGAAGGTCCTTTTATGTCTATGCTAAT | 7582 |
| gb:MN997409 | Organism:Severe | AGAGTCGAATGTACAAC TATTGTTAATGGTGTTAGAAGGTCCTTTTATGTCTATGCTAAT | 7582 |
| gb:MN938384 | Organism:Severe | AGAGTCGAATGTACAAC TATTGTTAATGGTGTTAGAAGGTCCTTTTATGTCTATGCTAAT | 7550 |
| gb:MT044258 | Organism:Severe | AGAGTCGAATGTACAAC TATTGTTAATGGTGTTAGAAGGTCCTTTTATGTCTATGCTAAT | 7558 |
| gb:MT039890 | Organism:Severe | AGAGTCGAATGTACAAC TATTGTTAATGGTGTTAGAAGGTCCTTTTATGTCTATGCTAAT | 7582 |
| gb:MN988713 | Organism:Severe | AGAGTCGAATGTACAAC TATTGTTAATGGTGTTAGAAGGTCCTTTTATGTCTATGCTAAT | 7582 |
| gb:LC521925 | Organism:Severe | AGAGTCGAATGTACAAC TATTGTTAATGGTGTTAGAAGGTCCTTTTATGTCTATGCTAAT | 7555 |
| gb:MT093571 | Organism:Severe | AGAGTCGAATGTACAAC TATTGTTAATGGTGTTAGAAGGTCCTTTTATGTCTATGCTAAT | 7582 |
| gb:MT039887 | Organism:Severe | AGAGTCGAATGTACAAC TATTGTTAATGGTGTTAGAAGGTCCTTTTATGTCTATGCTAAT | 7582 |
| gb:MT019530 | Organism:Severe | AGAGTCGAATGTACAAC TATTGTTAATGGTGTTAGAAGGTCCTTTTATGTCTATGCTAAT | 7582 |
| gb:MT039888 | Organism:Severe | AGAGTCGAATGTACAAC TATTGTTAATGGTGTTAGAAGGTCCTTTTATGTCTATGCTAAT | 7582 |
| gb:LC522972 | Organism:Severe | AGAGTCGAATGTACAAC TATTGTTAATGGTGTTAGAAGGTCCTTTTATGTCTATGCTAAT | 7579 |
| gb:MT027063 | Organism:Severe | AGAGTCGAATGTACAAC TATTGTTAATGGTGTTAGAAGGTCCTTTTATGTCTATGCTAAT | 7582 |
| gb:MT027062 | Organism:Severe | AGAGTCGAATGTACAAC TATTGTTAATGGTGTTAGAAGGTCCTTTTATGTCTATGCTAAT | 7582 |
| gb:MT019529 | Organism:Severe | AGAGTCGAATGTACAAC TATTGTTAATGGTGTTAGAAGGTCCTTTTATGTCTATGCTAAT | 7582 |
| gb:MN996529 | Organism:Severe | AGAGTCGAATGTACAAC TATTGTTAATGGTGTTAGAAGGTCCTTTTATGTCTATGCTAAT | 7570 |
| gb:MN996531 | Organism:Severe | AGAGTCGAATGTACAAC TATTGTTAATGGTGTTAGAAGGTCCTTTTATGTCTATGCTAAT | 7569 |
| gb:MT066176 | Organism:Severe | AGAGTCGAATGTACAAC TATTGTTAATGGTGTTAGAAGGTCCTTTTATGTCTATGCTAAT | 7582 |
| gb:MT027064 | Organism:Severe | AGAGTCGAATGTACAAC TATTGTTAATGGTGTTAGAAGGTCCTTTTATGTCTATGCTAAT | 7582 |
| gb:MN994468 | Organism:Severe | AGAGTCGAATGTACAAC TATTGTTAATGGTGTTAGAAGGTCCTTTTATGTCTATGCTAAT | 7582 |
| gb:MT072688 | Organism:Severe | AGAGTCGAATGTACAAC TATTGTTAATGGTGTTAGAAGGTCCTTTTATGTCTATGCTAAT | 7567 |
| gb:MN996527 | Organism:Severe | AGAGTCGAATGTACAAC TATTGTTAATGGTGTTAGAAGGTCCTTTTATGTCTATGCTAAT | 7549 |
| gb:MT093631 | Organism:Severe | AGAGTCGAATGTACAAC TATTGTTAATGGTGTTAGAAGGTCCTTTTATGTCTATGCTAAT | 7620 |
| gb:MT106053 | Organism:Severe | AGAGTCGAATGTACAAC TATTGTTAATGGTGTTAGAAGGTCCTTTTATGTCTATGCTAAT | 7582 |
| gb:MT019533 | Organism:Severe | AGAGTCGAATGTACAAC TATTGTTAATGGTGTTAGAAGGTCCTTTTATGTCTATGCTAAT | 7582 |
| gb:MT019531 | Organism:Severe | AGAGTCGAATGTACAAC TATTGTTAATGGTGTTAGAAGGTCCTTTTATGTCTATGCTAAT | 7582 |
| gb:MN996528 | Organism:Severe | AGAGTCGAATGTACAAC TATTGTTAATGGTGTTAGAAGGTCCTTTTATGTCTATGCTAAT | 7582 |
| gb:MN996530 | Organism:Severe | AGAGTCGAATGTACAAC TATTGTTAATGGTGTTAGAAGGTCCTTTTATGTCTATGCTAAT | 7568 |
| gb:MN908947 | Organism:Severe | AGAGTCGAATGTACAAC TATTGTTAATGGTGTTAGAAGGTCCTTTTATGTCTATGCTAAT | 7582 |
| gb:MT019532 | Organism:Severe | AGAGTCGAATGTACAAC TATTGTTAATGGTGTTAGAAGGTCCTTTTATGTCTATGCTAAT | 7582 |

\*\*\*\*\*

|             |                 |                                                              |      |
|-------------|-----------------|--------------------------------------------------------------|------|
| gb:MT020781 | Organism:Severe | GGAGGTAAGGCTTTTGCAAAC TACACAATTGGAATTGTGTTAATTGTGATACATTCTGT | 7630 |
| gb:MT007544 | Organism:Severe | GGAGGTAAGGCTTTTGCAAAC TACACAATTGGAATTGTGTTAATTGTGATACATTCTGT | 7642 |
| gb:MN994467 | Organism:Severe | GGAGGTAAGGCTTTTGCAAAC TACACAATTGGAATTGTGTTAATTGTGATACATTCTGT | 7642 |
| gb:MT044257 | Organism:Severe | GGAGGTAAGGCTTTTGCAAAC TACACAATTGGAATTGTGTTAATTGTGATACATTCTGT | 7642 |





|             |                 |                                                             |      |
|-------------|-----------------|-------------------------------------------------------------|------|
| gb:MN908947 | Organism:Severe | CCAATAAATCCTACTGACCAGTCTTCTTACATCGTTGATAGTGTACAGTGAAGAATGGT | 7762 |
| gb:MT019532 | Organism:Severe | CCAATAAATCCTACTGACCAGTCTTCTTACATCGTTGATAGTGTACAGTGAAGAATGGT | 7762 |
| *****       |                 |                                                             |      |

|             |                 |                                                           |      |
|-------------|-----------------|-----------------------------------------------------------|------|
| gb:MT020781 | Organism:Severe | TCCATCCATCTTTACTTTGATAAAGCTGGTCAAAGACTTATGAAAGACATTCTCTCT | 7810 |
| gb:MT007544 | Organism:Severe | TCCATCCATCTTTACTTTGATAAAGCTGGTCAAAGACTTATGAAAGACATTCTCTCT | 7822 |
| gb:MN994467 | Organism:Severe | TCCATCCATCTTTACTTTGATAAAGCTGGTCAAAGACTTATGAAAGACATTCTCTCT | 7822 |
| gb:MT044257 | Organism:Severe | TCCATCCATCTTTACTTTGATAAAGCTGGTCAAAGACTTATGAAAGACATTCTCTCT | 7822 |
| gb:MT106054 | Organism:Severe | TCCATCCATCTTTACTTTGATAAAGCTGGTCAAAGACTTATGAAAGACATTCTCTCT | 7822 |
| gb:MT049951 | Organism:Severe | TCCATCCATCTTTACTTTGATAAAGCTGGTCAAAGACTTATGAAAGACATTCTCTCT | 7822 |
| gb:MN975262 | Organism:Severe | TCCATCCATCTTTACTTTGATAAAGCTGGTCAAAGACTTATGAAAGACATTCTCTCT | 7822 |
| gb:MT106052 | Organism:Severe | TCCATCCATCTTTACTTTGATAAAGCTGGTCAAAGACTTATGAAAGACATTCTCTCT | 7822 |
| gb:LC522975 | Organism:Severe | TCCATCCATCTTTACTTTGATAAAGCTGGTCAAAGACTTATGAAAGACATTCTCTCT | 7819 |
| gb:LC522973 | Organism:Severe | TCCATCCATCTTTACTTTGATAAAGCTGGTCAAAGACTTATGAAAGACATTCTCTCT | 7819 |
| gb:LC522974 | Organism:Severe | TCCATCCATCTTTACTTTGATAAAGCTGGTCAAAGACTTATGAAAGACATTCTCTCT | 7819 |
| gb:MN985325 | Organism:Severe | TCCATCCATCTTTACTTTGATAAAGCTGGTCAAAGACTTATGAAAGACATTCTCTCT | 7822 |
| gb:MT020881 | Organism:Severe | TCCATCCATCTTTACTTTGATAAAGCTGGTCAAAGACTTATGAAAGACATTCTCTCT | 7822 |
| gb:MT020880 | Organism:Severe | TCCATCCATCTTTACTTTGATAAAGCTGGTCAAAGACTTATGAAAGACATTCTCTCT | 7822 |
| gb:MT066175 | Organism:Severe | TCCATCCATCTTTACTTTGATAAAGCTGGTCAAAGACTTATGAAAGACATTCTCTCT | 7822 |
| gb:MN997409 | Organism:Severe | TCCATCCATCTTTACTTTGATAAAGCTGGTCAAAGACTTATGAAAGACATTCTCTCT | 7822 |
| gb:MN938384 | Organism:Severe | TCCATCCATCTTTACTTTGATAAAGCTGGTCAAAGACTTATGAAAGACATTCTCTCT | 7790 |
| gb:MT044258 | Organism:Severe | TCCATCCATCTTTACTTTGATAAAGCTGGTCAAAGACTTATGAAAGACATTCTCTCT | 7798 |
| gb:MT039890 | Organism:Severe | TCCATCCATCTTTACTTTGATAAAGCTGGTCAAAGACTTATGAAAGACATTCTCTCT | 7822 |
| gb:MN988713 | Organism:Severe | TCCATCCATCTTTACTTTGATAAAGCTGGTCAAAGACTTATGAAAGACATTCTCTCT | 7822 |
| gb:LC521925 | Organism:Severe | TCCATCCATCTTTACTTTGATAAAGCTGGTCAAAGACTTATGAAAGACATTCTCTCT | 7795 |
| gb:MT093571 | Organism:Severe | TCCATCCATCTTTACTTTGATAAAGCTGGTCAAAGACTTATGAAAGACATTCTCTCT | 7822 |
| gb:MT039887 | Organism:Severe | TCCATCCATCTTTACTTTGATAAAGCTGGTCAAAGACTTATGAAAGACATTCTCTCT | 7822 |
| gb:MT019530 | Organism:Severe | TCCATCCATCTTTACTTTGATAAAGCTGGTCAAAGACTTATGAAAGACATTCTCTCT | 7822 |
| gb:MT039888 | Organism:Severe | TCCATCCATCTTTACTTTGATAAAGCTGGTCAAAGACTTATGAAAGACATTCTCTCT | 7822 |
| gb:LC522972 | Organism:Severe | TCCATCCATCTTTACTTTGATAAAGCTGGTCAAAGACTTATGAAAGACATTCTCTCT | 7819 |
| gb:MT027063 | Organism:Severe | TCCATCCATCTTTACTTTGATAAAGCTGGTCAAAGACTTATGAAAGACATTCTCTCT | 7822 |
| gb:MT027062 | Organism:Severe | TCCATCCATCTTTACTTTGATAAAGCTGGTCAAAGACTTATGAAAGACATTCTCTCT | 7822 |
| gb:MT019529 | Organism:Severe | TCCATCCATCTTTACTTTGATAAAGCTGGTCAAAGACTTATGAAAGACATTCTCTCT | 7822 |
| gb:MN996529 | Organism:Severe | TCCATCCATCTTTACTTTGATAAAGCTGGTCAAAGACTTATGAAAGACATTCTCTCT | 7810 |
| gb:MN996531 | Organism:Severe | TCCATCCATCTTTACTTTGATAAAGCTGGTCAAAGACTTATGAAAGACATTCTCTCT | 7809 |
| gb:MT066176 | Organism:Severe | TCCATCCATCTTTACTTTGATAAAGCTGGTCAAAGACTTATGAAAGACATTCTCTCT | 7822 |
| gb:MT027064 | Organism:Severe | TCCATCCATCTTTACTTTGATAAAGCTGGTCAAAGACTTATGAAAGACATTCTCTCT | 7822 |
| gb:MN994468 | Organism:Severe | TCCATCCATCTTTACTTTGATAAAGCTGGTCAAAGACTTATGAAAGACATTCTCTCT | 7822 |
| gb:MT072688 | Organism:Severe | TCCATCCATCTTTACTTTGATAAAGCTGGTCAAAGACTTATGAAAGACATTCTCTCT | 7807 |
| gb:MN996527 | Organism:Severe | TCCATCCATCTTTACTTTGATAAAGCTGGTCAAAGACTTATGAAAGACATTCTCTCT | 7789 |
| gb:MT093631 | Organism:Severe | TCCATCCATCTTTACTTTGATAAAGCTGGTCAAAGACTTATGAAAGACATTCTCTCT | 7860 |
| gb:MT106053 | Organism:Severe | TCCATCCATCTTTACTTTGATAAAGCTGGTCAAAGACTTATGAAAGACATTCTCTCT | 7822 |
| gb:MT019533 | Organism:Severe | TCCATCCATCTTTACTTTGATAAAGCTGGTCAAAGACTTATGAAAGACATTCTCTCT | 7822 |
| gb:MT019531 | Organism:Severe | TCCATCCATCTTTACTTTGATAAAGCTGGTCAAAGACTTATGAAAGACATTCTCTCT | 7822 |
| gb:MN996528 | Organism:Severe | TCCATCCATCTTTACTTTGATAAAGCTGGTCAAAGACTTATGAAAGACATTCTCTCT | 7822 |
| gb:MN996530 | Organism:Severe | TCCATCCATCTTTACTTTGATAAAGCTGGTCAAAGACTTATGAAAGACATTCTCTCT | 7808 |
| gb:MN908947 | Organism:Severe | TCCATCCATCTTTACTTTGATAAAGCTGGTCAAAGACTTATGAAAGACATTCTCTCT | 7822 |
| gb:MT019532 | Organism:Severe | TCCATCCATCTTTACTTTGATAAAGCTGGTCAAAGACTTATGAAAGACATTCTCTCT | 7822 |
| *****       |                 |                                                           |      |

|             |                 |                                                             |      |
|-------------|-----------------|-------------------------------------------------------------|------|
| gb:MT020781 | Organism:Severe | CATTTTGTAACTTAGACAACCTGAGAGCTAATAACACTAAAGTTTCATTGCCTATTAAT | 7870 |
| gb:MT007544 | Organism:Severe | CATTTTGTAACTTAGACAACCTGAGAGCTAATAACACTAAAGTTTCATTGCCTATTAAT | 7882 |
| gb:MN994467 | Organism:Severe | CATTTTGTAACTTAGACAACCTGAGAGCTAATAACACTAAAGTTTCATTGCCTATTAAT | 7882 |
| gb:MT044257 | Organism:Severe | CATTTTGTAACTTAGACAACCTGAGAGCTAATAACACTAAAGTTTCATTGCCTATTAAT | 7882 |
| gb:MT106054 | Organism:Severe | CATTTTGTAACTTAGACAACCTGAGAGCTAATAACACTAAAGTTTCATTGCCTATTAAT | 7882 |
| gb:MT049951 | Organism:Severe | CATTTTGTAACTTAGACAACCTGAGAGCTAATAACACTAAAGTTTCATTGCCTATTAAT | 7882 |
| gb:MN975262 | Organism:Severe | CATTTTGTAACTTAGACAACCTGAGAGCTAATAACACTAAAGTTTCATTGCCTATTAAT | 7882 |
| gb:MT106052 | Organism:Severe | CATTTTGTAACTTAGACAACCTGAGAGCTAATAACACTAAAGTTTCATTGCCTATTAAT | 7882 |
| gb:LC522975 | Organism:Severe | CATTTTGTAACTTAGACAACCTGAGAGCTAATAACACTAAAGTTTCATTGCCTATTAAT | 7879 |
| gb:LC522973 | Organism:Severe | CATTTTGTAACTTAGACAACCTGAGAGCTAATAACACTAAAGTTTCATTGCCTATTAAT | 7879 |
| gb:LC522974 | Organism:Severe | CATTTTGTAACTTAGACAACCTGAGAGCTAATAACACTAAAGTTTCATTGCCTATTAAT | 7879 |
| gb:MN985325 | Organism:Severe | CATTTTGTAACTTAGACAACCTGAGAGCTAATAACACTAAAGTTTCATTGCCTATTAAT | 7882 |
| gb:MT020881 | Organism:Severe | CATTTTGTAACTTAGACAACCTGAGAGCTAATAACACTAAAGTTTCATTGCCTATTAAT | 7882 |
| gb:MT020880 | Organism:Severe | CATTTTGTAACTTAGACAACCTGAGAGCTAATAACACTAAAGTTTCATTGCCTATTAAT | 7882 |
| gb:MT066175 | Organism:Severe | CATTTTGTAACTTAGACAACCTGAGAGCTAATAACACTAAAGTTTCATTGCCTATTAAT | 7882 |

|             |                 |                                                              |      |
|-------------|-----------------|--------------------------------------------------------------|------|
| gb:MN997409 | Organism:Severe | CATTTTGTAACTTAGACAACCTGAGAGCTAATAACACTAAAGGTTTCATTGCCTATTAAT | 7882 |
| gb:MN938384 | Organism:Severe | CATTTTGTAACTTAGACAACCTGAGAGCTAATAACACTAAAGGTTTCATTGCCTATTAAT | 7850 |
| gb:MT044258 | Organism:Severe | CATTTTGTAACTTAGACAACCTGAGAGCTAATAACACTAAAGGTTTCATTGCCTATTAAT | 7858 |
| gb:MT039890 | Organism:Severe | CATTTTGTAACTTAGACAACCTGAGAGCTAATAACACTAAAGGTTTCATTGCCTATTAAT | 7882 |
| gb:MN988713 | Organism:Severe | CATTTTGTAACTTAGACAACCTGAGAGCTAATAACACTAAAGGTTTCATTGCCTATTAAT | 7882 |
| gb:LC521925 | Organism:Severe | CATTTTGTAACTTAGACAACCTGAGAGCTAATAACACTAAAGGTTTCATTGCCTATTAAT | 7855 |
| gb:MT093571 | Organism:Severe | CATTTTGTAACTTAGACAACCTGAGAGCTAATAACACTAAAGGTTTCATTGCCTATTAAT | 7882 |
| gb:MT039887 | Organism:Severe | CATTTTGTAACTTAGACAACCTGAGAGCTAATAACACTAAAGGTTTCATTGCCTATTAAT | 7882 |
| gb:MT019530 | Organism:Severe | CATTTTGTAACTTAGACAACCTGAGAGCTAATAACACTAAAGGTTTCATTGCCTATTAAT | 7882 |
| gb:MT039888 | Organism:Severe | CATTTTGTAACTTAGACAACCTGAGAGCTAATAACACTAAAGGTTTCATTGCCTATTAAT | 7882 |
| gb:LC522972 | Organism:Severe | CATTTTGTAACTTAGACAACCTGAGAGCTAATAACACTAAAGGTTTCATTGCCTATTAAT | 7879 |
| gb:MT027063 | Organism:Severe | CATTTTGTAACTTAGACAACCTGAGAGCTAATAACACTAAAGGTTTCATTGCCTATTAAT | 7882 |
| gb:MT027062 | Organism:Severe | CATTTTGTAACTTAGACAACCTGAGAGCTAATAACACTAAAGGTTTCATTGCCTATTAAT | 7882 |
| gb:MT019529 | Organism:Severe | CATTTTGTAACTTAGACAACCTGAGAGCTAATAACACTAAAGGTTTCATTGCCTATTAAT | 7882 |
| gb:MN996529 | Organism:Severe | CATTTTGTAACTTAGACAACCTGAGAGCTAATAACACTAAAGGTTTCATTGCCTATTAAT | 7870 |
| gb:MN996531 | Organism:Severe | CATTTTGTAACTTAGACAACCTGAGAGCTAATAACACTAAAGGTTTCATTGCCTATTAAT | 7869 |
| gb:MT066176 | Organism:Severe | CATTTTGTAACTTAGACAACCTGAGAGCTAATAACACTAAAGGTTTCATTGCCTATTAAT | 7882 |
| gb:MT027064 | Organism:Severe | CATTTTGTAACTTAGACAACCTGAGAGCTAATAACACTAAAGGTTTCATTGCCTATTAAT | 7882 |
| gb:MN994468 | Organism:Severe | CATTTTGTAACTTAGACAACCTGAGAGCTAATAACACTAAAGGTTTCATTGCCTATTAAT | 7882 |
| gb:MT072688 | Organism:Severe | CATTTTGTAACTTAGACAACCTGAGAGCTAATAACACTAAAGGTTTCATTGCCTATTAAT | 7867 |
| gb:MN996527 | Organism:Severe | CATTTTGTAACTTAGACAACCTGAGAGCTAATAACACTAAAGGTTTCATTGCCTATTAAT | 7849 |
| gb:MT093631 | Organism:Severe | CATTTTGTAACTTAGACAACCTGAGAGCTAATAACACTAAAGGTTTCATTGCCTATTAAT | 7920 |
| gb:MT106053 | Organism:Severe | CATTTTGTAACTTAGACAACCTGAGAGCTAATAACACTAAAGGTTTCATTGCCTATTAAT | 7882 |
| gb:MT019533 | Organism:Severe | CATTTTGTAACTTAGACAACCTGAGAGCTAATAACACTAAAGTTCATTGCCTATTAAT   | 7882 |
| gb:MT019531 | Organism:Severe | CATTTTGTAACTTAGACAACCTGAGAGCTAATAACACTAAAGGTTTCATTGCCTATTAAT | 7882 |
| gb:MN996528 | Organism:Severe | CATTTTGTAACTTAGACAACCTGAGAGCTAATAACACTAAAGGTTTCATTGCCTATTAAT | 7882 |
| gb:MN996530 | Organism:Severe | CATTTTGTAACTTAGACAACCTGAGAGCTAATAACACTAAAGGTTTCATTGCCTATTAAT | 7868 |
| gb:MN908947 | Organism:Severe | CATTTTGTAACTTAGACAACCTGAGAGCTAATAACACTAAAGGTTTCATTGCCTATTAAT | 7882 |
| gb:MT019532 | Organism:Severe | CATTTTGTAACTTAGACAACCTGAGAGCTAATAACACTAAAGGTTTCATTGCCTATTAAT | 7882 |

\*\*\*\*\*

|             |                 |                                                            |      |
|-------------|-----------------|------------------------------------------------------------|------|
| gb:MT020781 | Organism:Severe | GTTATAGTTTTGATGGTAAATCAAATGTGAAGAATCATCTGCAAAATCAGCGTCTGTT | 7930 |
| gb:MT007544 | Organism:Severe | GTTATAGTTTTGATGGTAAATCAAATGTGAAGAATCATCTGCAAAATCAGCGTCTGTT | 7942 |
| gb:MN994467 | Organism:Severe | GTTATAGTTTTGATGGTAAATCAAATGTGAAGAATCATCTGCAAAATCAGCGTCTGTT | 7942 |
| gb:MT044257 | Organism:Severe | GTTATAGTTTTGATGGTAAATCAAATGTGAAGAATCATCTGCAAAATCAGCGTCTGTT | 7942 |
| gb:MT106054 | Organism:Severe | GTTATAGTTTTGATGGTAAATCAAATGTGAAGAATCATCTGCAAAATCAGCGTCTGTT | 7942 |
| gb:MT049951 | Organism:Severe | GTTATAGTTTTGATGGTAAATCAAATGTGAAGAATCATCTGCAAAATCAGCGTCTGTT | 7942 |
| gb:MN975262 | Organism:Severe | GTTATAGTTTTGATGGTAAATCAAATGTGAAGAATCATCTGCAAAATCAGCGTCTGTT | 7942 |
| gb:MT106052 | Organism:Severe | GTTATAGTTTTGATGGTAAATCAAATGTGAAGAATCATCTGCAAAATCAGCGTCTGTT | 7942 |
| gb:LC522975 | Organism:Severe | GTTATAGTTTTGATGGTAAATCAAATGTGAAGAATCATCTGCAAAATCAGCGTCTGTT | 7939 |
| gb:LC522973 | Organism:Severe | GTTATAGTTTTGATGGTAAATCAAATGTGAAGAATCATCTGCAAAATCAGCGTCTGTT | 7939 |
| gb:LC522974 | Organism:Severe | GTTATAGTTTTGATGGTAAATCAAATGTGAAGAATCATCTGCAAAATCAGCGTCTGTT | 7939 |
| gb:MN985325 | Organism:Severe | GTTATAGTTTTGATGGTAAATCAAATGTGAAGAATCATCTGCAAAATCAGCGTCTGTT | 7942 |
| gb:MT020881 | Organism:Severe | GTTATAGTTTTGATGGTAAATCAAATGTGAAGAATCATCTGCAAAATCAGCGTCTGTT | 7942 |
| gb:MT020880 | Organism:Severe | GTTATAGTTTTGATGGTAAATCAAATGTGAAGAATCATCTGCAAAATCAGCGTCTGTT | 7942 |
| gb:MT066175 | Organism:Severe | GTTATAGTTTTGATGGTAAATCAAATGTGAAGAATCATCTGCAAAATCAGCGTCTGTT | 7942 |
| gb:MN997409 | Organism:Severe | GTTATAGTTTTGATGGTAAATCAAATGTGAAGAATCATCTGCAAAATCAGCGTCTGTT | 7942 |
| gb:MN938384 | Organism:Severe | GTTATAGTTTTGATGGTAAATCAAATGTGAAGAATCATCTGCAAAATCAGCGTCTGTT | 7910 |
| gb:MT044258 | Organism:Severe | GTTATAGTTTTGATGGTAAATCAAATGTGAAGAATCATCTGCAAAATCAGCGTCTGTT | 7918 |
| gb:MT039890 | Organism:Severe | GTTATAGTTTTGATGGTAAATCAAATGTGAAGAATCATCTGCAAAATCAGCGTCTGTT | 7942 |
| gb:MN988713 | Organism:Severe | GTTATAGTTTTGATGGTAAATCAAATGTGAAGAATCATCTGCAAAATCAGCGTCTGTT | 7942 |
| gb:LC521925 | Organism:Severe | GTTATAGTTTTGATGGTAAATCAAATGTGAAGAATCATCTGCAAAATCAGCGTCTGTT | 7915 |
| gb:MT093571 | Organism:Severe | GTTATAGTTTTGATGGTAAATCAAATGTGAAGAATCATCTGCAAAATCAGCGTCTGTT | 7942 |
| gb:MT039887 | Organism:Severe | GTTATAGTTTTGATGGTAAATCAAATGTGAAGAATCATCTGCAAAATCAGCGTCTGTT | 7942 |
| gb:MT019530 | Organism:Severe | GTTATAGTTTTGATGGTAAATCAAATGTGAAGAATCATCTGCAAAATCAGCGTCTGTT | 7942 |
| gb:MT039888 | Organism:Severe | GTTATAGTTTTGATGGTAAATCAAATGTGAAGAATCATCTGCAAAATCAGCGTCTGTT | 7942 |
| gb:LC522972 | Organism:Severe | GTTATAGTTTTGATGGTAAATCAAATGTGAAGAATCATCTGCAAAATCAGCGTCTGTT | 7939 |
| gb:MT027063 | Organism:Severe | GTTATAGTTTTGATGGTAAATCAAATGTGAAGAATCATCTGCAAAATCAGCGTCTGTT | 7942 |
| gb:MT027062 | Organism:Severe | GTTATAGTTTTGATGGTAAATCAAATGTGAAGAATCATCTGCAAAATCAGCGTCTGTT | 7942 |
| gb:MT019529 | Organism:Severe | GTTATAGTTTTGATGGTAAATCAAATGTGAAGAATCATCTGCAAAATCAGCGTCTGTT | 7942 |
| gb:MN996529 | Organism:Severe | GTTATAGTTTTGATGGTAAATCAAATGTGAAGAATCATCTGCAAAATCAGCGTCTGTT | 7930 |
| gb:MN996531 | Organism:Severe | GTTATAGTTTTGATGGTAAATCAAATGTGAAGAATCATCTGCAAAATCAGCGTCTGTT | 7929 |
| gb:MT066176 | Organism:Severe | GTTATAGTTTTGATGGTAAATCAAATGTGAAGAATCATCTGCAAAATCAGCGTCTGTT | 7942 |
| gb:MT027064 | Organism:Severe | GTTATAGTTTTGATGGTAAATCAAATGTGAAGAATCATCTGCAAAATCAGCGTCTGTT | 7942 |
| gb:MN994468 | Organism:Severe | GTTATAGTTTTGATGGTAAATCAAATGTGAAGAATCATCTGCAAAATCAGCGTCTGTT | 7942 |

|             |                 |                                                             |      |
|-------------|-----------------|-------------------------------------------------------------|------|
| gb:MT072688 | Organism:Severe | GTTATAGTTTTTGATGGTAAATCAAATGTGAAGAATCATCTGCAAAATCAGCGTCTGTT | 7927 |
| gb:MN996527 | Organism:Severe | GTTATAGTTTTTGATGGTAAATCAAATGTGAAGAATCATCTGCAAAATCAGCGTCTGTT | 7909 |
| gb:MT093631 | Organism:Severe | GTTATAGTTTTTGATGGTAAATCAAATGTGAAGAATCATCTGCAAAATCAGCGTCTGTT | 7980 |
| gb:MT106053 | Organism:Severe | GTTATAGTTTTTGATGGTAAATCAAATGTGAAGAATCATCTGCAAAATCAGCGTCTGTT | 7942 |
| gb:MT019533 | Organism:Severe | GTTATAGTTTTTGATGGTAAATCAAATGTGAAGAATCATCTGCAAAATCAGCGTCTGTT | 7942 |
| gb:MT019531 | Organism:Severe | GTTATAGTTTTTGATGGTAAATCAAATGTGAAGAATCATCTGCAAAATCAGCGTCTGTT | 7942 |
| gb:MN996528 | Organism:Severe | GTTATAGTTTTTGATGGTAAATCAAATGTGAAGAATCATCTGCAAAATCAGCGTCTGTT | 7942 |
| gb:MN996530 | Organism:Severe | GTTATAGTTTTTGATGGTAAATCAAATGTGAAGAATCATCTGCAAAATCAGCGTCTGTT | 7928 |
| gb:MN908947 | Organism:Severe | GTTATAGTTTTTGATGGTAAATCAAATGTGAAGAATCATCTGCAAAATCAGCGTCTGTT | 7942 |
| gb:MT019532 | Organism:Severe | GTTATAGTTTTTGATGGTAAATCAAATGTGAAGAATCATCTGCAAAATCAGCGTCTGTT | 7942 |

\*\*\*\*\*

|             |                 |                                                              |      |
|-------------|-----------------|--------------------------------------------------------------|------|
| gb:MT020781 | Organism:Severe | TACTACAGTCAGCTTATGTGTCAACCTATACTGTTACTAGATCAGGCATTAGTGTCTGAT | 7990 |
| gb:MT007544 | Organism:Severe | TACTACAGTCAGCTTATGTGTCAACCTATACTGTTACTAGATCAGGCATTAGTGTCTGAT | 8002 |
| gb:MN994467 | Organism:Severe | TACTACAGTCAGCTTATGTGTCAACCTATACTGTTACTAGATCAGGCATTAGTGTCTGAT | 8002 |
| gb:MT044257 | Organism:Severe | TACTACAGTCAGCTTATGTGTCAACCTATACTGTTACTAGATCAGGCATTAGTGTCTGAT | 8002 |
| gb:MT106054 | Organism:Severe | TACTACAGTCAGCTTATGTGTCAACCTATACTGTTACTAGATCAGGCATTAGTGTCTGAT | 8002 |
| gb:MT049951 | Organism:Severe | TACTACAGTCAGCTTATGTGTCAACCTATACTGTTACTAGATCAGGCATTAGTGTCTGAT | 8002 |
| gb:MN975262 | Organism:Severe | TACTACAGTCAGCTTATGTGTCAACCTATACTGTTACTAGATCAGGCATTAGTGTCTGAT | 8002 |
| gb:MT106052 | Organism:Severe | TACTACAGTCAGCTTATGTGTCAACCTATACTGTTACTAGATCAGGCATTAGTGTCTGAT | 8002 |
| gb:LC522975 | Organism:Severe | TACTACAGTCAGCTTATGTGTCAACCTATACTGTTACTAGATCAGGCATTAGTGTCTGAT | 7999 |
| gb:LC522973 | Organism:Severe | TACTACAGTCAGCTTATGTGTCAACCTATACTGTTACTAGATCAGGCATTAGTGTCTGAT | 7999 |
| gb:LC522974 | Organism:Severe | TACTACAGTCAGCTTATGTGTCAACCTATACTGTTACTAGATCAGGCATTAGTGTCTGAT | 7999 |
| gb:MN985325 | Organism:Severe | TACTACAGTCAGCTTATGTGTCAACCTATACTGTTACTAGATCAGGCATTAGTGTCTGAT | 8002 |
| gb:MT020881 | Organism:Severe | TACTACAGTCAGCTTATGTGTCAACCTATACTGTTACTAGATCAGGCATTAGTGTCTGAT | 8002 |
| gb:MT020880 | Organism:Severe | TACTACAGTCAGCTTATGTGTCAACCTATACTGTTACTAGATCAGGCATTAGTGTCTGAT | 8002 |
| gb:MT066175 | Organism:Severe | TACTACAGTCAGCTTATGTGTCAACCTATACTGTTACTAGATCAGGCATTAGTGTCTGAT | 8002 |
| gb:MN997409 | Organism:Severe | TACTACAGTCAGCTTATGTGTCAACCTATACTGTTACTAGATCAGGCATTAGTGTCTGAT | 8002 |
| gb:MN938384 | Organism:Severe | TACTACAGTCAGCTTATGTGTCAACCTATACTGTTACTAGATCAGGCATTAGTGTCTGAT | 7970 |
| gb:MT044258 | Organism:Severe | TACTACAGTCAGCTTATGTGTCAACCTATACTGTTACTAGATCAGGCATTAGTGTCTGAT | 7978 |
| gb:MT039890 | Organism:Severe | TACTACAGTCAGCTTATGTGTCAACCTATACTGTTACTAGATCAGGCATTAGTGTCTGAT | 8002 |
| gb:MN988713 | Organism:Severe | TACTACAGTCAGCTTATGTGTCAACCTATACTGTTACTAGATCAGGCATTAGTGTCTGAT | 8002 |
| gb:LC521925 | Organism:Severe | TACTACAGTCAGCTTATGTGTCAACCTATACTGTTACTAGATCAGGCATTAGTGTCTGAT | 7975 |
| gb:MT093571 | Organism:Severe | TACTACAGTCAGCTTATGTGTCAACCTATACTGTTACTAGATCAGGCATTAGTGTCTGAT | 8002 |
| gb:MT039887 | Organism:Severe | TACTACAGTCAGCTTATGTGTCAACCTATACTGTTACTAGATCAGGCATTAGTGTCTGAT | 8002 |
| gb:MT019530 | Organism:Severe | TACTACAGTCAGCTTATGTGTCAACCTATACTGTTACTAGATCAGGCATTAGTGTCTGAT | 8002 |
| gb:MT039888 | Organism:Severe | TACTACAGTCAGCTTATGTGTCAACCTATACTGTTACTAGATCAGGCATTAGTGTCTGAT | 8002 |
| gb:LC522972 | Organism:Severe | TACTACAGTCAGCTTATGTGTCAACCTATACTGTTACTAGATCAGGCATTAGTGTCTGAT | 7999 |
| gb:MT027063 | Organism:Severe | TACTACAGTCAGCTTATGTGTCAACCTATACTGTTACTAGATCAGGCATTAGTGTCTGAT | 8002 |
| gb:MT027062 | Organism:Severe | TACTACAGTCAGCTTATGTGTCAACCTATACTGTTACTAGATCAGGCATTAGTGTCTGAT | 8002 |
| gb:MT019529 | Organism:Severe | TACTACAGTCAGCTTATGTGTCAACCTATACTGTTACTAGATCAGGCATTAGTGTCTGAT | 8002 |
| gb:MN996529 | Organism:Severe | TACTACAGTCAGCTTATGTGTCAACCTATACTGTTACTAGATCAGGCATTAGTGTCTGAT | 7990 |
| gb:MN996531 | Organism:Severe | TACTACAGTCAGCTTATGTGTCAACCTATACTGTTACTAGATCAGGCATTAGTGTCTGCT | 7989 |
| gb:MT066176 | Organism:Severe | TACTACAGTCAGCTTATGTGTCAACCTATACTGTTACTAGATCAGGCATTAGTGTCTGAT | 8002 |
| gb:MT027064 | Organism:Severe | TACTACAGTCAGCTTATGTGTCAACCTATACTGTTACTAGATCAGGCATTAGTGTCTGAT | 8002 |
| gb:MN994468 | Organism:Severe | TACTACAGTCAGCTTATGTGTCAACCTATACTGTTACTAGATCAGGCATTAGTGTCTGAT | 8002 |
| gb:MT072688 | Organism:Severe | TACTACAGTCAGCTTATGTGTCAACCTATACTGTTACTAGATCAGGCATTAGTGTCTGAT | 7987 |
| gb:MN996527 | Organism:Severe | TACTACAGTCAGCTTATGTGTCAACCTATACTGTTACTAGATCAGGCATTAGTGTCTGAT | 7969 |
| gb:MT093631 | Organism:Severe | TACTACAGTCAGCTTATGTGTCAACCTATACTGTTACTAGATCAGGCATTAGTGTCTGAT | 8040 |
| gb:MT106053 | Organism:Severe | TACTACAGTCAGCTTATGTGTCAACCTATACTGTTACTAGATCAGGCATTAGTGTCTGAT | 8002 |
| gb:MT019533 | Organism:Severe | TACTACAGTCAGCTTATGTGTCAACCTATACTGTTACTAGATCAGGCATTAGTGTCTGAT | 8002 |
| gb:MT019531 | Organism:Severe | TACTACAGTCAGCTTATGTGTCAACCTATACTGTTACTAGATCAGGCATTAGTGTCTGAT | 8002 |
| gb:MN996528 | Organism:Severe | TACTACAGTCAGCTTATGTGTCAACCTATACTGTTACTAGATCAGGCATTAGTGTCTGAT | 8002 |
| gb:MN996530 | Organism:Severe | TACTACAGTCAGCTTATGTGTCAACCTATACTGTTACTAGATCAGGCATTAGTGTCTGAT | 7988 |
| gb:MN908947 | Organism:Severe | TACTACAGTCAGCTTATGTGTCAACCTATACTGTTACTAGATCAGGCATTAGTGTCTGAT | 8002 |
| gb:MT019532 | Organism:Severe | TACTACAGTCAGCTTATGTGTCAACCTATACTGTTACTAGATCAGGCATTAGTGTCTGAT | 8002 |

\*\*\*\*\*

|             |                 |                                                             |      |
|-------------|-----------------|-------------------------------------------------------------|------|
| gb:MT020781 | Organism:Severe | GTTGGTGATAGTGCGGAAGTTGCAGTTAAAATGTTTATGCTTACGTTAATACGTTTTCA | 8050 |
| gb:MT007544 | Organism:Severe | GTTGGTGATAGTGCGGAAGTTGCAGTTAAAATGTTTATGCTTACGTTAATACGTTTTCA | 8062 |
| gb:MN994467 | Organism:Severe | GTTGGTGATAGTGCGGAAGTTGCAGTTAAAATGTTTATGCTTACGTTAATACGTTTTCA | 8062 |
| gb:MT044257 | Organism:Severe | GTTGGTGATAGTGCGGAAGTTGCAGTTAAAATGTTTATGCTTACGTTAATACGTTTTCA | 8062 |
| gb:MT106054 | Organism:Severe | GTTGGTGATAGTGCGGAAGTTGCAGTTAAAATGTTTATGCTTACGTTAATACGTTTTCA | 8062 |
| gb:MT049951 | Organism:Severe | GTTGGTGATAGTGCGGAAGTTGCAGTTAAAATGTTTATGCTTACGTTAATACGTTTTCA | 8062 |
| gb:MN975262 | Organism:Severe | GTTGGTGATAGTGCGGAAGTTGCAGTTAAAATGTTTATGCTTACGTTAATACGTTTTCA | 8062 |



|             |                 |                |      |
|-------------|-----------------|----------------|------|
| gb:MT106052 | Organism:Severe | GTTGGTGATAGTGC | 8062 |
| gb:LC522975 | Organism:Severe | GTTGGTGATAGTGC | 8059 |
| gb:LC522973 | Organism:Severe | GTTGGTGATAGTGC | 8059 |
| gb:LC522974 | Organism:Severe | GTTGGTGATAGTGC | 8059 |
| gb:MN985325 | Organism:Severe | GTTGGTGATAGTGC | 8062 |
| gb:MT020881 | Organism:Severe | GTTGGTGATAGTGC | 8062 |
| gb:MT020880 | Organism:Severe | GTTGGTGATAGTGC | 8062 |
| gb:MT066175 | Organism:Severe | GTTGGTGATAGTGC | 8062 |
| gb:MN997409 | Organism:Severe | GTTGGTGATAGTGC | 8062 |
| gb:MN938384 | Organism:Severe | GTTGGTGATAGTGC | 8030 |
| gb:MT044258 | Organism:Severe | GTTGGTGATAGTGC | 8038 |
| gb:MT039890 | Organism:Severe | GTTGGTGATAGTGC | 8062 |
| gb:MN988713 | Organism:Severe | GTTGGTGATAGTGC | 8062 |
| gb:LC521925 | Organism:Severe | GTTGGTGATAGTGC | 8035 |
| gb:MT093571 | Organism:Severe | GTTGGTGATAGTGC | 8062 |
| gb:MT039887 | Organism:Severe | GTTGGTGATAGTGC | 8062 |
| gb:MT019530 | Organism:Severe | GTTGGTGATAGTGC | 8062 |
| gb:MT039888 | Organism:Severe | GTTGGTGATAGTGC | 8062 |
| gb:LC522972 | Organism:Severe | GTTGGTGATAGTGC | 8059 |
| gb:MT027063 | Organism:Severe | GTTGGTGATAGTGC | 8062 |
| gb:MT027062 | Organism:Severe | GTTGGTGATAGTGC | 8062 |
| gb:MT019529 | Organism:Severe | GTTGGTGATAGTGC | 8062 |
| gb:MN996529 | Organism:Severe | GTTGGTGATAGTGC | 8050 |
| gb:MN996531 | Organism:Severe | GTTGGTGATAGTGC | 8049 |
| gb:MT066176 | Organism:Severe | GTTGGTGATAGTGC | 8062 |
| gb:MT027064 | Organism:Severe | GTTGGTGATAGTGC | 8062 |
| gb:MN994468 | Organism:Severe | GTTGGTGATAGTGC | 8062 |
| gb:MT072688 | Organism:Severe | GTTGGTGATAGTGC | 8047 |
| gb:MN996527 | Organism:Severe | GTTGGTGATAGTGC | 8029 |
| gb:MT093631 | Organism:Severe | GTTGGTGATAGTGC | 8100 |
| gb:MT106053 | Organism:Severe | GTTGGTGATAGTGC | 8062 |
| gb:MT019533 | Organism:Severe | GTTGGTGATAGTGC | 8062 |
| gb:MT019531 | Organism:Severe | GTTGGTGATAGTGC | 8062 |
| gb:MN996528 | Organism:Severe | GTTGGTGATAGTGC | 8062 |
| gb:MN996530 | Organism:Severe | GTTGGTGATAGTGC | 8048 |
| gb:MN908947 | Organism:Severe | GTTGGTGATAGTGC | 8062 |
| gb:MT019532 | Organism:Severe | GTTGGTGATAGTGC | 8062 |

\*\*\*\*\*

|             |                 |                 |      |
|-------------|-----------------|-----------------|------|
| gb:MT020781 | Organism:Severe | TCAACTTTAACGTAC | 8110 |
| gb:MT007544 | Organism:Severe | TCAACTTTAACGTAC | 8122 |
| gb:MN994467 | Organism:Severe | TCAACTTTAACGTAC | 8122 |
| gb:MT044257 | Organism:Severe | TCAACTTTAACGTAC | 8122 |
| gb:MT106054 | Organism:Severe | TCAACTTTAACGTAC | 8122 |
| gb:MT049951 | Organism:Severe | TCAACTTTAACGTAC | 8122 |
| gb:MN975262 | Organism:Severe | TCAACTTTAACGTAC | 8122 |
| gb:MT106052 | Organism:Severe | TCAACTTTAACGTAC | 8122 |
| gb:LC522975 | Organism:Severe | TCAACTTTAACGTAC | 8119 |
| gb:LC522973 | Organism:Severe | TCAACTTTAACGTAC | 8119 |
| gb:LC522974 | Organism:Severe | TCAACTTTAACGTAC | 8119 |
| gb:MN985325 | Organism:Severe | TCAACTTTAACGTAC | 8122 |
| gb:MT020881 | Organism:Severe | TCAACTTTAACGTAC | 8122 |
| gb:MT020880 | Organism:Severe | TCAACTTTAACGTAC | 8122 |
| gb:MT066175 | Organism:Severe | TCAACTTTAACGTAC | 8122 |
| gb:MN997409 | Organism:Severe | TCAACTTTAACGTAC | 8122 |
| gb:MN938384 | Organism:Severe | TCAACTTTAACGTAC | 8090 |
| gb:MT044258 | Organism:Severe | TCAACTTTAACGTAC | 8098 |
| gb:MT039890 | Organism:Severe | TCAACTTTAACGTAC | 8122 |
| gb:MN988713 | Organism:Severe | TCAACTTTAACGTAC | 8122 |
| gb:LC521925 | Organism:Severe | TCAACTTTAACGTAC | 8095 |
| gb:MT093571 | Organism:Severe | TCAACTTTAACGTAC | 8122 |
| gb:MT039887 | Organism:Severe | TCAACTTTAACGTAC | 8122 |
| gb:MT019530 | Organism:Severe | TCAACTTTAACGTAC | 8122 |
| gb:MT039888 | Organism:Severe | TCAACTTTAACGTAC | 8122 |
| gb:LC522972 | Organism:Severe | TCAACTTTAACGTAC | 8119 |



|             |                 |                                                            |      |
|-------------|-----------------|------------------------------------------------------------|------|
| gb:MT020781 | Organism:Severe | GGGTTTGTGATTAGATGTAGAAACTAAAGATGTTGTTGAATGTCTTAAATTGTCACAT | 8230 |
| gb:MT007544 | Organism:Severe | GGGTTTGTGATTAGATGTAGAAACTAAAGATGTTGTTGAATGTCTTAAATTGTCACAT | 8242 |
| gb:MN994467 | Organism:Severe | GGGTTTGTGATTAGATGTAGAAACTAAAGATGTTGTTGAATGTCTTAAATTGTCACAT | 8242 |
| gb:MT044257 | Organism:Severe | GGGTTTGTGATTAGATGTAGAAACTAAAGATGTTGTTGAATGTCTTAAATTGTCACAT | 8242 |
| gb:MT106054 | Organism:Severe | GGGTTTGTGATTAGATGTAGAAACTAAAGATGTTGTTGAATGTCTTAAATTGTCACAT | 8242 |
| gb:MT049951 | Organism:Severe | GGGTTTGTGATTAGATGTAGAAACTAAAGATGTTGTTGAATGTCTTAAATTGTCACAT | 8242 |
| gb:MN975262 | Organism:Severe | GGGTTTGTGATTAGATGTAGAAACTAAAGATGTTGTTGAATGTCTTAAATTGTCACAT | 8242 |
| gb:MT106052 | Organism:Severe | GGGTTTGTGATTAGATGTAGAAACTAAAGATGTTGTTGAATGTCTTAAATTGTCACAT | 8242 |
| gb:LC522975 | Organism:Severe | GGGTTTGTGATTAGATGTAGAAACTAAAGATGTTGTTGAATGTCTTAAATTGTCACAT | 8239 |
| gb:LC522973 | Organism:Severe | GGGTTTGTGATTAGATGTAGAAACTAAAGATGTTGTTGAATGTCTTAAATTGTCACAT | 8239 |
| gb:LC522974 | Organism:Severe | GGGTTTGTGATTAGATGTAGAAACTAAAGATGTTGTTGAATGTCTTAAATTGTCACAT | 8239 |
| gb:MN985325 | Organism:Severe | GGGTTTGTGATTAGATGTAGAAACTAAAGATGTTGTTGAATGTCTTAAATTGTCACAT | 8242 |
| gb:MT020881 | Organism:Severe | GGGTTTGTGATTAGATGTAGAAACTAAAGATGTTGTTGAATGTCTTAAATTGTCACAT | 8242 |
| gb:MT020880 | Organism:Severe | GGGTTTGTGATTAGATGTAGAAACTAAAGATGTTGTTGAATGTCTTAAATTGTCACAT | 8242 |
| gb:MT066175 | Organism:Severe | GGGTTTGTGATTAGATGTAGAAACTAAAGATGTTGTTGAATGTCTTAAATTGTCACAT | 8242 |
| gb:MN997409 | Organism:Severe | GGGTTTGTGATTAGATGTAGAAACTAAAGATGTTGTTGAATGTCTTAAATTGTCACAT | 8242 |
| gb:MN938384 | Organism:Severe | GGGTTTGTGATTAGATGTAGAAACTAAAGATGTTGTTGAATGTCTTAAATTGTCACAT | 8210 |
| gb:MT044258 | Organism:Severe | GGGTTTGTGATTAGATGTAGAAACTAAAGATGTTGTTGAATGTCTTAAATTGTCACAT | 8218 |
| gb:MT039890 | Organism:Severe | GGGTTTGTGATTAGATGTAGAAACTAAAGATGTTGTTGAATGTCTTAAATTGTCACAT | 8242 |
| gb:MN988713 | Organism:Severe | GGGTTTGTGATTAGATGTAGAAACTAAAGATGTTGTTGAATGTCTTAAATTGTCACAT | 8242 |
| gb:LC521925 | Organism:Severe | GGGTTTGTGATTAGATGTAGAAACTAAAGATGTTGTTGAATGTCTTAAATTGTCACAT | 8215 |
| gb:MT093571 | Organism:Severe | GGGTTTGTGATTAGATGTAGAAACTAAAGATGTTGTTGAATGTCTTAAATTGTCACAT | 8242 |
| gb:MT039887 | Organism:Severe | GGGTTTGTGATTAGATGTAGAAACTAAAGATGTTGTTGAATGTCTTAAATTGTCACAT | 8242 |
| gb:MT019530 | Organism:Severe | GGGTTTGTGATTAGATGTAGAAACTAAAGATGTTGTTGAATGTCTTAAATTGTCACAT | 8242 |
| gb:MT039888 | Organism:Severe | GGGTTTGTGATTAGATGTAGAAACTAAAGATGTTGTTGAATGTCTTAAATTGTCACAT | 8242 |
| gb:LC522972 | Organism:Severe | GGGTTTGTGATTAGATGTAGAAACTAAAGATGTTGTTGAATGTCTTAAATTGTCACAT | 8239 |
| gb:MT027063 | Organism:Severe | GGGTTTGTGATTAGATGTAGAAACTAAAGATGTTGTTGAATGTCTTAAATTGTCACAT | 8242 |
| gb:MT027062 | Organism:Severe | GGGTTTGTGATTAGATGTAGAAACTAAAGATGTTGTTGAATGTCTTAAATTGTCACAT | 8242 |
| gb:MT019529 | Organism:Severe | GGGTTTGTGATTAGATGTAGAAACTAAAGATGTTGTTGAATGTCTTAAATTGTCACAT | 8242 |
| gb:MN996529 | Organism:Severe | GGGTTTGTGATTAGATGTAGAAACTAAAGATGTTGTTGAATGTCTTAAATTGTCACAT | 8230 |
| gb:MN996531 | Organism:Severe | GGGTTTGTGATTAGATGTAGAAACTAAAGATGTTGTTGAATGTCTTAAATTGTCACAT | 8229 |
| gb:MT066176 | Organism:Severe | GGGTTTGTGATTAGATGTAGAAACTAAAGATGTTGTTGAATGTCTTAAATTGTCACAT | 8242 |
| gb:MT027064 | Organism:Severe | GGGTTTGTGATTAGATGTAGAAACTAAAGATGTTGTTGAATGTCTTAAATTGTCACAT | 8242 |
| gb:MN994468 | Organism:Severe | GGGTTTGTGATTAGATGTAGAAACTAAAGATGTTGTTGAATGTCTTAAATTGTCACAT | 8242 |
| gb:MT072688 | Organism:Severe | GGGTTTGTGATTAGATGTAGAAACTAAAGATGTTGTTGAATGTCTTAAATTGTCACAT | 8227 |
| gb:MN996527 | Organism:Severe | GGGTTTGTGATTAGATGTAGAAACTAAAGATGTTGTTGAATGTCTTAAATTGTCACAT | 8209 |
| gb:MT093631 | Organism:Severe | GGGTTTGTGATTAGATGTAGAAACTAAAGATGTTGTTGAATGTCTTAAATTGTCACAT | 8280 |
| gb:MT106053 | Organism:Severe | GGGTTTGTGATTAGATGTAGAAACTAAAGATGTTGTTGAATGTCTTAAATTGTCACAT | 8242 |
| gb:MT019533 | Organism:Severe | GGGTTTGTGATTAGATGTAGAAACTAAAGATGTTGTTGAATGTCTTAAATTGTCACAT | 8242 |
| gb:MT019531 | Organism:Severe | GGGTTTGTGATTAGATGTAGAAACTAAAGATGTTGTTGAATGTCTTAAATTGTCACAT | 8242 |
| gb:MN996528 | Organism:Severe | GGGTTTGTGATTAGATGTAGAAACTAAAGATGTTGTTGAATGTCTTAAATTGTCACAT | 8242 |
| gb:MN996530 | Organism:Severe | GGGTTTGTGATTAGATGTAGAAACTAAAGATGTTGTTGAATGTCTTAAATTGTCACAT | 8228 |
| gb:MN908947 | Organism:Severe | GGGTTTGTGATTAGATGTAGAAACTAAAGATGTTGTTGAATGTCTTAAATTGTCACAT | 8242 |
| gb:MT019532 | Organism:Severe | GGGTTTGTGATTAGATGTAGAAACTAAAGATGTTGTTGAATGTCTTAAATTGTCACAT | 8242 |

\*\*\*\*\*

|             |                 |                                                              |      |
|-------------|-----------------|--------------------------------------------------------------|------|
| gb:MT020781 | Organism:Severe | CAATCTGACATAGAAGTTACTGGCGATAGTTGTAATAACTATATGCTCACCTATAACAAA | 8290 |
| gb:MT007544 | Organism:Severe | CAATCTGACATAGAAGTTACTGGCGATAGTTGTAATAACTATATGCTCACCTATAACAAA | 8302 |
| gb:MN994467 | Organism:Severe | CAATCTGACATAGAAGTTACTGGCGATAGTTGTAATAACTATATGCTCACCTATAACAAA | 8302 |
| gb:MT044257 | Organism:Severe | CAATCTGACATAGAAGTTACTGGCGATAGTTGTAATAACTATATGCTCACCTATAACAAA | 8302 |
| gb:MT106054 | Organism:Severe | CAATCTGACATAGAAGTTACTGGCGATAGTTGTAATAACTATATGCTCACCTATAACAAA | 8302 |
| gb:MT049951 | Organism:Severe | CAATCTGACATAGAAGTTACTGGCGATAGTTGTAATAACTATATGCTCACCTATAACAAA | 8302 |
| gb:MN975262 | Organism:Severe | CAATCTGACATAGAAGTTACTGGCGATAGTTGTAATAACTATATGCTCACCTATAACAAA | 8302 |
| gb:MT106052 | Organism:Severe | CAATCTGACATAGAAGTTACTGGCGATAGTTGTAATAACTATATGCTCACCTATAACAAA | 8302 |
| gb:LC522975 | Organism:Severe | CAATCTGACATAGAAGTTACTGGCGATAGTTGTAATAACTATATGCTCACCTATAACAAA | 8299 |
| gb:LC522973 | Organism:Severe | CAATCTGACATAGAAGTTACTGGCGATAGTTGTAATAACTATATGCTCACCTATAACAAA | 8299 |
| gb:LC522974 | Organism:Severe | CAATCTGACATAGAAGTTACTGGCGATAGTTGTAATAACTATATGCTCACCTATAACAAA | 8299 |
| gb:MN985325 | Organism:Severe | CAATCTGACATAGAAGTTACTGGCGATAGTTGTAATAACTATATGCTCACCTATAACAAA | 8302 |
| gb:MT020881 | Organism:Severe | CAATCTGACATAGAAGTTACTGGCGATAGTTGTAATAACTATATGCTCACCTATAACAAA | 8302 |
| gb:MT020880 | Organism:Severe | CAATCTGACATAGAAGTTACTGGCGATAGTTGTAATAACTATATGCTCACCTATAACAAA | 8302 |
| gb:MT066175 | Organism:Severe | CAATCTGACATAGAAGTTACTGGCGATAGTTGTAATAACTATATGCTCACCTATAACAAA | 8302 |
| gb:MN997409 | Organism:Severe | CAATCTGACATAGAAGTTACTGGCGATAGTTGTAATAACTATATGCTCACCTATAACAAA | 8302 |
| gb:MN938384 | Organism:Severe | CAATCTGACATAGAAGTTACTGGCGATAGTTGTAATAACTATATGCTCACCTATAACAAA | 8270 |
| gb:MT044258 | Organism:Severe | CAATCTGACATAGAAGTTACTGGCGATAGTTGTAATAACTATATGCTCACCTATAACAAA | 8278 |



|             |                 |                                                              |      |
|-------------|-----------------|--------------------------------------------------------------|------|
| gb:MT106053 | Organism:Severe | GTTGAAAACATGACACCCCGTGACCTTGGTGCTTGTATTGACTGTAGTGCGCGTCATATT | 8362 |
| gb:MT019533 | Organism:Severe | GTTGAAAACATGACACCCCGTGACCTTGGTGCTTGTATTGACTGTAGTGCGCGTCATATT | 8362 |
| gb:MT019531 | Organism:Severe | GTTGAAAACATGACACCCCGTGACCTTGGTGCTTGTATTGACTGTAGTGCGCGTCATATT | 8362 |
| gb:MN996528 | Organism:Severe | GTTGAAAACATGACACCCCGTGACCTTGGTGCTTGTATTGACTGTAGTGCGCGTCATATT | 8362 |
| gb:MN996530 | Organism:Severe | GTTGAAAACATGACACCCCGTGACCTTGGTGCTTGTATTGACTGTAGTGCGCGTCATATT | 8348 |
| gb:MN908947 | Organism:Severe | GTTGAAAACATGACACCCCGTGACCTTGGTGCTTGTATTGACTGTAGTGCGCGTCATATT | 8362 |
| gb:MT019532 | Organism:Severe | GTTGAAAACATGACACCCCGTGACCTTGGTGCTTGTATTGACTGTAGTGCGCGTCATATT | 8362 |

\*\*\*\*\*

|             |                 |                                                               |      |
|-------------|-----------------|---------------------------------------------------------------|------|
| gb:MT020781 | Organism:Severe | AATGCGCAGGTAGCAAAAAGTCACAACATTGCTTTGATATGGAACGTTAAAGATTTTCATG | 8410 |
| gb:MT007544 | Organism:Severe | AATGCGCAGGTAGCAAAAAGTCACAACATTGCTTTGATATGGAACGTTAAAGATTTTCATG | 8422 |
| gb:MN994467 | Organism:Severe | AATGCGCAGGTAGCAAAAAGTCACAACATTGCTTTGATATGGAACGTTAAAGATTTTCATG | 8422 |
| gb:MT044257 | Organism:Severe | AATGCGCAGGTAGCAAAAAGTCACAACATTGCTTTGATATGGAACGTTAAAGATTTTCATG | 8422 |
| gb:MT106054 | Organism:Severe | AATGCGCAGGTAGCAAAAAGTCACAACATTGCTTTGATATGGAACGTTAAAGATTTTCATG | 8422 |
| gb:MT049951 | Organism:Severe | AATGCGCAGGTAGCAAAAAGTCACAACATTGCTTTGATATGGAACGTTAAAGATTTTCATG | 8422 |
| gb:MN975262 | Organism:Severe | AATGCGCAGGTAGCAAAAAGTCACAACATTGCTTTGATATGGAACGTTAAAGATTTTCATG | 8422 |
| gb:MT106052 | Organism:Severe | AATGCGCAGGTAGCAAAAAGTCACAACATTGCTTTGATATGGAACGTTAAAGATTTTCATG | 8422 |
| gb:LC522975 | Organism:Severe | AATGCGCAGGTAGCAAAAAGTCACAACATTGCTTTGATATGGAACGTTAAAGATTTTCATG | 8419 |
| gb:LC522973 | Organism:Severe | AATGCGCAGGTAGCAAAAAGTCACAACATTGCTTTGATATGGAACGTTAAAGATTTTCATG | 8419 |
| gb:LC522974 | Organism:Severe | AATGCGCAGGTAGCAAAAAGTCACAACATTGCTTTGATATGGAACGTTAAAGATTTTCATG | 8419 |
| gb:MN985325 | Organism:Severe | AATGCGCAGGTAGCAAAAAGTCACAACATTGCTTTGATATGGAACGTTAAAGATTTTCATG | 8422 |
| gb:MT020881 | Organism:Severe | AATGCGCAGGTAGCAAAAAGTCACAACATTGCTTTGATATGGAACGTTAAAGATTTTCATG | 8422 |
| gb:MT020880 | Organism:Severe | AATGCGCAGGTAGCAAAAAGTCACAACATTGCTTTGATATGGAACGTTAAAGATTTTCATG | 8422 |
| gb:MT066175 | Organism:Severe | AATGCGCAGGTAGCAAAAAGTCACAACATTGCTTTGATATGGAACGTTAAAGATTTTCATG | 8422 |
| gb:MN997409 | Organism:Severe | AATGCGCAGGTAGCAAAAAGTCACAACATTGCTTTGATATGGAACGTTAAAGATTTTCATG | 8422 |
| gb:MN938384 | Organism:Severe | AATGCGCAGGTAGCAAAAAGTCACAACATTGCTTTGATATGGAACGTTAAAGATTTTCATG | 8390 |
| gb:MT044258 | Organism:Severe | AATGCGCAGGTAGCAAAAAGTCACAACATTGCTTTGATATGGAACGTTAAAGATTTTCATG | 8398 |
| gb:MT039890 | Organism:Severe | AATGCGCAGGTAGCAAAAAGTCACAACATTGCTTTGATATGGAACGTTAAAGATTTTCATG | 8422 |
| gb:MN988713 | Organism:Severe | AATGCGCAGGTAGCAAAAAGTCACAACATTGCTTTGATATGGAACGTTAAAGATTTTCATG | 8422 |
| gb:LC521925 | Organism:Severe | AATGCGCAGGTAGCAAAAAGTCACAACATTGCTTTGATATGGAACGTTAAAGATTTTCATG | 8395 |
| gb:MT093571 | Organism:Severe | AATGCGCAGGTAGCAAAAAGTCACAACATTGCTTTGATATGGAACGTTAAAGATTTTCATG | 8422 |
| gb:MT039887 | Organism:Severe | AATGCGCAGGTAGCAAAAAGTCACAACATTGCTTTGATATGGAACGTTAAAGATTTTCATG | 8422 |
| gb:MT019530 | Organism:Severe | AATGCGCAGGTAGCAAAAAGTCACAACATTGCTTTGATATGGAACGTTAAAGATTTTCATG | 8422 |
| gb:MT039888 | Organism:Severe | AATGCGCAGGTAGCAAAAAGTCACAACATTGCTTTGATATGGAACGTTAAAGATTTTCATG | 8422 |
| gb:LC522972 | Organism:Severe | AATGCGCAGGTAGCAAAAAGTCACAACATTGCTTTGATATGGAACGTTAAAGATTTTCATG | 8419 |
| gb:MT027063 | Organism:Severe | AATGCGCAGGTAGCAAAAAGTCACAACATTGCTTTGATATGGAACGTTAAAGATTTTCATG | 8422 |
| gb:MT027062 | Organism:Severe | AATGCGCAGGTAGCAAAAAGTCACAACATTGCTTTGATATGGAACGTTAAAGATTTTCATG | 8422 |
| gb:MT019529 | Organism:Severe | AATGCGCAGGTAGCAAAAAGTCACAACATTGCTTTGATATGGAACGTTAAAGATTTTCATG | 8422 |
| gb:MN996529 | Organism:Severe | AATGCGCAGGTAGCAAAAAGTCACAACATTGCTTTGATATGGAACGTTAAAGATTTTCATG | 8410 |
| gb:MN996531 | Organism:Severe | AATGCGCAGGTAGCAAAAAGTCACAACATTGCTTTGATATGGAACGTTAAAGATTTTCATG | 8409 |
| gb:MT066176 | Organism:Severe | AATGCGCAGGTAGCAAAAAGTCACAACATTGCTTTGATATGGAACGTTAAAGATTTTCATG | 8422 |
| gb:MT027064 | Organism:Severe | AATGCGCAGGTAGCAAAAAGTCACAACATTGCTTTGATATGGAACGTTAAAGATTTTCATG | 8422 |
| gb:MN994468 | Organism:Severe | AATGCGCAGGTAGCAAAAAGTCACAACATTGCTTTGATATGGAACGTTAAAGATTTTCATG | 8422 |
| gb:MT072688 | Organism:Severe | AATGCGCAGGTAGCAAAAAGTCACAACATTGCTTTGATATGGAACGTTAAAGATTTTCATG | 8407 |
| gb:MN996527 | Organism:Severe | AATGCGCAGGTAGCAAAAAGTCACAACATTGCTTTGATATGGAACGTTAAAGATTTTCATG | 8389 |
| gb:MT093631 | Organism:Severe | AATGCGCAGGTAGCAAAAAGTCACAACATTGCTTTGATATGGAACGTTAAAGATTTTCATG | 8460 |
| gb:MT106053 | Organism:Severe | AATGCGCAGGTAGCAAAAAGTCACAACATTGCTTTGATATGGAACGTTAAAGATTTTCATG | 8422 |
| gb:MT019533 | Organism:Severe | AATGCGCAGGTAGCAAAAAGTCACAACATTGCTTTGATATGGAACGTTAAAGATTTTCATG | 8422 |
| gb:MT019531 | Organism:Severe | AATGCGCAGGTAGCAAAAAGTCACAACATTGCTTTGATATGGAACGTTAAAGATTTTCATG | 8422 |
| gb:MN996528 | Organism:Severe | AATGCGCAGGTAGCAAAAAGTCACAACATTGCTTTGATATGGAACGTTAAAGATTTTCATG | 8422 |
| gb:MN996530 | Organism:Severe | AATGCGCAGGTAGCAAAAAGTCACAACATTGCTTTGATATGGAACGTTAAAGATTTTCATG | 8408 |
| gb:MN908947 | Organism:Severe | AATGCGCAGGTAGCAAAAAGTCACAACATTGCTTTGATATGGAACGTTAAAGATTTTCATG | 8422 |
| gb:MT019532 | Organism:Severe | AATGCGCAGGTAGCAAAAAGTCACAACATTGCTTTGATATGGAACGTTAAAGATTTTCATG | 8422 |

\*\*\*\*\*

|             |                 |                                                            |      |
|-------------|-----------------|------------------------------------------------------------|------|
| gb:MT020781 | Organism:Severe | TCATTGTCTGAACAACACGAAAACAATACGTAGTGCTGCTAAAAAGAATAACTTACCT | 8470 |
| gb:MT007544 | Organism:Severe | TCATTGTCTGAACAACACGAAAACAATACGTAGTGCTGCTAAAAAGAATAACTTACCT | 8482 |
| gb:MN994467 | Organism:Severe | TCATTGTCTGAACAACACGAAAACAATACGTAGTGCTGCTAAAAAGAATAACTTACCT | 8482 |
| gb:MT044257 | Organism:Severe | TCATTGTCTGAACAACACGAAAACAATACGTAGTGCTGCTAAAAAGAATAACTTACCT | 8482 |
| gb:MT106054 | Organism:Severe | TCATTGTCTGAACAACACGAAAACAATACGTAGTGCTGCTAAAAAGAATAACTTACCT | 8482 |
| gb:MT049951 | Organism:Severe | TCATTGTCTGAACAACACGAAAACAATACGTAGTGCTGCTAAAAAGAATAACTTACCT | 8482 |
| gb:MN975262 | Organism:Severe | TCATTGTCTGAACAACACGAAAACAATACGTAGTGCTGCTAAAAAGAATAACTTACCT | 8482 |
| gb:MT106052 | Organism:Severe | TCATTGTCTGAACAACACGAAAACAATACGTAGTGCTGCTAAAAAGAATAACTTACCT | 8482 |
| gb:LC522975 | Organism:Severe | TCATTGTCTGAACAACACGAAAACAATACGTAGTGCTGCTAAAAAGAATAACTTACCT | 8479 |
| gb:LC522973 | Organism:Severe | TCATTGTCTGAACAACACGAAAACAATACGTAGTGCTGCTAAAAAGAATAACTTACCT | 8479 |

|             |                 |                                                      |      |
|-------------|-----------------|------------------------------------------------------|------|
| gb:LC522974 | Organism:Severe | TCATTGCTGAACAACACGAAAACAATACGTCGCTAAAAAGAATAACTTACCT | 8479 |
| gb:MN985325 | Organism:Severe | TCATTGCTGAACAACACGAAAACAATACGTCGCTAAAAAGAATAACTTACCT | 8482 |
| gb:MT020881 | Organism:Severe | TCATTGCTGAACAACACGAAAACAATACGTCGCTAAAAAGAATAACTTACCT | 8482 |
| gb:MT020880 | Organism:Severe | TCATTGCTGAACAACACGAAAACAATACGTCGCTAAAAAGAATAACTTACCT | 8482 |
| gb:MT066175 | Organism:Severe | TCATTGCTGAACAACACGAAAACAATACGTCGCTAAAAAGAATAACTTACCT | 8482 |
| gb:MN997409 | Organism:Severe | TCATTGCTGAACAACACGAAAACAATACGTCGCTAAAAAGAATAACTTACCT | 8482 |
| gb:MN938384 | Organism:Severe | TCATTGCTGAACAACACGAAAACAATACGTCGCTAAAAAGAATAACTTACCT | 8450 |
| gb:MT044258 | Organism:Severe | TCATTGCTGAACAACACGAAAACAATACGTCGCTAAAAAGAATAACTTACCT | 8458 |
| gb:MT039890 | Organism:Severe | TCATTGCTGAACAACACGAAAACAATACGTCGCTAAAAAGAATAACTTACCT | 8482 |
| gb:MN988713 | Organism:Severe | TCATTGCTGAACAACACGAAAACAATACGTCGCTAAAAAGAATAACTTACCT | 8482 |
| gb:LC521925 | Organism:Severe | TCATTGCTGAACAACACGAAAACAATACGTCGCTAAAAAGAATAACTTACCT | 8455 |
| gb:MT093571 | Organism:Severe | TCATTGCTGAACAACACGAAAACAATACGTCGCTAAAAAGAATAACTTACCT | 8482 |
| gb:MT039887 | Organism:Severe | TCATTGCTGAACAACACGAAAACAATACGTCGCTAAAAAGAATAACTTACCT | 8482 |
| gb:MT019530 | Organism:Severe | TCATTGCTGAACAACACGAAAACAATACGTCGCTAAAAAGAATAACTTACCT | 8482 |
| gb:MT039888 | Organism:Severe | TCATTGCTGAACAACACGAAAACAATACGTCGCTAAAAAGAATAACTTACCT | 8482 |
| gb:LC522972 | Organism:Severe | TCATTGCTGAACAACACGAAAACAATACGTCGCTAAAAAGAATAACTTACCT | 8479 |
| gb:MT027063 | Organism:Severe | TCATTGCTGAACAACACGAAAACAATACGTCGCTAAAAAGAATAACTTACCT | 8482 |
| gb:MT027062 | Organism:Severe | TCATTGCTGAACAACACGAAAACAATACGTCGCTAAAAAGAATAACTTACCT | 8482 |
| gb:MT019529 | Organism:Severe | TCATTGCTGAACAACACGAAAACAATACGTCGCTAAAAAGAATAACTTACCT | 8482 |
| gb:MN996529 | Organism:Severe | TCATTGCTGAACAACACGAAAACAATACGTCGCTAAAAAGAATAACTTACCT | 8470 |
| gb:MN996531 | Organism:Severe | TCATTGCTGAACAACACGAAAACAATACGTCGCTAAAAAGAATAACTTACCT | 8469 |
| gb:MT066176 | Organism:Severe | TCATTGCTGAACAACACGAAAACAATACGTCGCTAAAAAGAATAACTTACCT | 8482 |
| gb:MT027064 | Organism:Severe | TCATTGCTGAACAACACGAAAACAATACGTCGCTAAAAAGAATAACTTACCT | 8482 |
| gb:MN994468 | Organism:Severe | TCATTGCTGAACAACACGAAAACAATACGTCGCTAAAAAGAATAACTTACCT | 8482 |
| gb:MT072688 | Organism:Severe | TCATTGCTGAACAACACGAAAACAATACGTCGCTAAAAAGAATAACTTACCT | 8467 |
| gb:MN996527 | Organism:Severe | TCATTGCTGAACAACACGAAAACAATACGTCGCTAAAAAGAATAACTTACCT | 8449 |
| gb:MT093631 | Organism:Severe | TCATTGCTGAACAACACGAAAACAATACGTCGCTAAAAAGAATAACTTACCT | 8520 |
| gb:MT106053 | Organism:Severe | TCATTGCTGAACAACACGAAAACAATACGTCGCTAAAAAGAATAACTTACCT | 8482 |
| gb:MT019533 | Organism:Severe | TCATTGCTGAACAACACGAAAACAATACGTCGCTAAAAAGAATAACTTACCT | 8482 |
| gb:MT019531 | Organism:Severe | TCATTGCTGAACAACACGAAAACAATACGTCGCTAAAAAGAATAACTTACCT | 8482 |
| gb:MN996528 | Organism:Severe | TCATTGCTGAACAACACGAAAACAATACGTCGCTAAAAAGAATAACTTACCT | 8482 |
| gb:MN996530 | Organism:Severe | TCATTGCTGAACAACACGAAAACAATACGTCGCTAAAAAGAATAACTTACCT | 8468 |
| gb:MN908947 | Organism:Severe | TCATTGCTGAACAACACGAAAACAATACGTCGCTAAAAAGAATAACTTACCT | 8482 |
| gb:MT019532 | Organism:Severe | TCATTGCTGAACAACACGAAAACAATACGTCGCTAAAAAGAATAACTTACCT | 8482 |

\*\*\*\*\*

|             |                 |                                                              |      |
|-------------|-----------------|--------------------------------------------------------------|------|
| gb:MT020781 | Organism:Severe | TTTAAGTTGACATGTGCAACTACTAGACAAGTTGTTAATGTTGTAACAACAAAGATAGCA | 8530 |
| gb:MT007544 | Organism:Severe | TTTAAGTTGACATGTGCAACTACTAGACAAGTTGTTAATGTTGTAACAACAAAGATAGCA | 8542 |
| gb:MN994467 | Organism:Severe | TTTAAGTTGACATGTGCAACTACTAGACAAGTTGTTAATGTTGTAACAACAAAGATAGCA | 8542 |
| gb:MT044257 | Organism:Severe | TTTAAGTTGACATGTGCAACTACTAGACAAGTTGTTAATGTTGTAACAACAAAGATAGCA | 8542 |
| gb:MT106054 | Organism:Severe | TTTAAGTTGACATGTGCAACTACTAGACAAGTTGTTAATGTTGTAACAACAAAGATAGCA | 8542 |
| gb:MT049951 | Organism:Severe | TTTAAGTTGACATGTGCAACTACTAGACAAGTTGTTAATGTTGTAACAACAAAGATAGCA | 8542 |
| gb:MN975262 | Organism:Severe | TTTAAGTTGACATGTGCAACTACTAGACAAGTTGTTAATGTTGTAACAACAAAGATAGCA | 8542 |
| gb:MT106052 | Organism:Severe | TTTAAGTTGACATGTGCAACTACTAGACAAGTTGTTAATGTTGTAACAACAAAGATAGCA | 8542 |
| gb:LC522975 | Organism:Severe | TTTAAGTTGACATGTGCAACTACTAGACAAGTTGTTAATGTTGTAACAACAAAGATAGCA | 8539 |
| gb:LC522973 | Organism:Severe | TTTAAGTTGACATGTGCAACTACTAGACAAGTTGTTAATGTTGTAACAACAAAGATAGCA | 8539 |
| gb:LC522974 | Organism:Severe | TTTAAGTTGACATGTGCAACTACTAGACAAGTTGTTAATGTTGTAACAACAAAGATAGCA | 8539 |
| gb:MN985325 | Organism:Severe | TTTAAGTTGACATGTGCAACTACTAGACAAGTTGTTAATGTTGTAACAACAAAGATAGCA | 8542 |
| gb:MT020881 | Organism:Severe | TTTAAGTTGACATGTGCAACTACTAGACAAGTTGTTAATGTTGTAACAACAAAGATAGCA | 8542 |
| gb:MT020880 | Organism:Severe | TTTAAGTTGACATGTGCAACTACTAGACAAGTTGTTAATGTTGTAACAACAAAGATAGCA | 8542 |
| gb:MT066175 | Organism:Severe | TTTAAGTTGACATGTGCAACTACTAGACAAGTTGTTAATGTTGTAACAACAAAGATAGCA | 8542 |
| gb:MN997409 | Organism:Severe | TTTAAGTTGACATGTGCAACTACTAGACAAGTTGTTAATGTTGTAACAACAAAGATAGCA | 8542 |
| gb:MN938384 | Organism:Severe | TTTAAGTTGACATGTGCAACTACTAGACAAGTTGTTAATGTTGTAACAACAAAGATAGCA | 8510 |
| gb:MT044258 | Organism:Severe | TTTAAGTTGACATGTGCAACTACTAGACAAGTTGTTAATGTTGTAACAACAAAGATAGCA | 8518 |
| gb:MT039890 | Organism:Severe | TTTAAGTTGACATGTGCAACTACTAGACAAGTTGTTAATGTTGTAACAACAAAGATAGCA | 8542 |
| gb:MN988713 | Organism:Severe | TTTAAGTTGACATGTGCAACTACTAGACAAGTTGTTAATGTTGTAACAACAAAGATAGCA | 8542 |
| gb:LC521925 | Organism:Severe | TTTAAGTTGACATGTGCAACTACTAGACAAGTTGTTAATGTTGTAACAACAAAGATAGCA | 8515 |
| gb:MT093571 | Organism:Severe | TTTAAGTTGACATGTGCAACTACTAGACAAGTTGTTAATGTTGTAACAACAAAGATAGCA | 8542 |
| gb:MT039887 | Organism:Severe | TTTAAGTTGACATGTGCAACTACTAGACAAGTTGTTAATGTTGTAACAACAAAGATAGCA | 8542 |
| gb:MT019530 | Organism:Severe | TTTAAGTTGACATGTGCAACTACTAGACAAGTTGTTAATGTTGTAACAACAAAGATAGCA | 8542 |
| gb:MT039888 | Organism:Severe | TTTAAGTTGACATGTGCAACTACTAGACAAGTTGTTAATGTTGTAACAACAAAGATAGCA | 8542 |
| gb:LC522972 | Organism:Severe | TTTAAGTTGACATGTGCAACTACTAGACAAGTTGTTAATGTTGTAACAACAAAGATAGCA | 8539 |
| gb:MT027063 | Organism:Severe | TTTAAGTTGACATGTGCAACTACTAGACAAGTTGTTAATGTTGTAACAACAAAGATAGCA | 8542 |
| gb:MT027062 | Organism:Severe | TTTAAGTTGACATGTGCAACTACTAGACAAGTTGTTAATGTTGTAACAACAAAGATAGCA | 8542 |
| gb:MT019529 | Organism:Severe | TTTAAGTTGACATGTGCAACTACTAGACAAGTTGTTAATGTTGTAACAACAAAGATAGCA | 8542 |

|             |                 |                                                               |      |
|-------------|-----------------|---------------------------------------------------------------|------|
| gb:MN996529 | Organism:Severe | TTTAAGTTGACATGTGCAACTACTAGACAAGTTGTTAATGTTGTAAACAACAAAGATAGCA | 8530 |
| gb:MN996531 | Organism:Severe | TTTAAGTTGACATGTGCAACTACTAGACAAGTTGTTAATGTTGTAAACAACAAAGATAGCA | 8529 |
| gb:MT066176 | Organism:Severe | TTTAAGTTGACATGTGCAACTACTAGACAAGTTGTTAATGTTGTAAACAACAAAGATAGCA | 8542 |
| gb:MT027064 | Organism:Severe | TTTAAGTTGACATGTGCAACTACTAGACAAGTTGTTAATGTTGTAAACAACAAAGATAGCA | 8542 |
| gb:MN994468 | Organism:Severe | TTTAAGTTGACATGTGCAACTACTAGACAAGTTGTTAATGTTGTAAACAACAAAGATAGCA | 8542 |
| gb:MT072688 | Organism:Severe | TTTAAGTTGACATGTGCAACTACTAGACAAGTTGTTAATGTTGTAAACAACAAAGATAGCA | 8527 |
| gb:MN996527 | Organism:Severe | TTTAAGTTGACATGTGCAACTACTAGACAAGTTGTTAATGTTGTAAACAACAAAGATAGCA | 8509 |
| gb:MT093631 | Organism:Severe | TTTAAGTTGACATGTGCAACTACTAGACAAGTTGTTAATGTTGTAAACAACAAAGATAGCA | 8580 |
| gb:MT106053 | Organism:Severe | TTTAAGTTGACATGTGCAACTACTAGACAAGTTGTTAATGTTGTAAACAACAAAGATAGCA | 8542 |
| gb:MT019533 | Organism:Severe | TTTAAGTTGACATGTGCAACTACTAGACAAGTTGTTAATGTTGTAAACAACAAAGATAGCA | 8542 |
| gb:MT019531 | Organism:Severe | TTTAAGTTGACATGTGCAACTACTAGACAAGTTGTTAATGTTGTAAACAACAAAGATAGCA | 8542 |
| gb:MN996528 | Organism:Severe | TTTAAGTTGACATGTGCAACTACTAGACAAGTTGTTAATGTTGTAAACAACAAAGATAGCA | 8542 |
| gb:MN996530 | Organism:Severe | TTTAAGTTGACATGTGCAACTACTAGACAAGTTGTTAATGTTGTAAACAACAAAGATAGCA | 8528 |
| gb:MN908947 | Organism:Severe | TTTAAGTTGACATGTGCAACTACTAGACAAGTTGTTAATGTTGTAAACAACAAAGATAGCA | 8542 |
| gb:MT019532 | Organism:Severe | TTTAAGTTGACATGTGCAACTACTAGACAAGTTGTTAATGTTGTAAACAACAAAGATAGCA | 8542 |

\*\*\*\*\*

|             |                 |                                                            |      |
|-------------|-----------------|------------------------------------------------------------|------|
| gb:MT020781 | Organism:Severe | CTTAAGGGTGGTAAAATTGTTAATAATTGGTTGAAGCAGTTAATTAAGTTTACTTGTG | 8590 |
| gb:MT007544 | Organism:Severe | CTTAAGGGTGGTAAAATTGTTAATAATTGGTTGAAGCAGTTAATTAAGTTTACTTGTG | 8602 |
| gb:MN994467 | Organism:Severe | CTTAAGGGTGGTAAAATTGTTAATAATTGGTTGAAGCAGTTAATTAAGTTTACTTGTG | 8602 |
| gb:MT044257 | Organism:Severe | CTTAAGGGTGGTAAAATTGTTAATAATTGGTTGAAGCAGTTAATTAAGTTTACTTGTG | 8602 |
| gb:MT106054 | Organism:Severe | CTTAAGGGTGGTAAAATTGTTAATAATTGGTTGAAGCAGTTAATTAAGTTTACTTGTG | 8602 |
| gb:MT049951 | Organism:Severe | CTTAAGGGTGGTAAAATTGTTAATAATTGGTTGAAGCAGTTAATTAAGTTTACTTGTG | 8602 |
| gb:MN975262 | Organism:Severe | CTTAAGGGTGGTAAAATTGTTAATAATTGGTTGAAGCAGTTAATTAAGTTTACTTGTG | 8602 |
| gb:MT106052 | Organism:Severe | CTTAAGGGTGGTAAAATTGTTAATAATTGGTTGAAGCAGTTAATTAAGTTTACTTGTG | 8602 |
| gb:LC522975 | Organism:Severe | CTTAAGGGTGGTAAAATTGTTAATAATTGGTTGAAGCAGTTAATTAAGTTTACTTGTG | 8599 |
| gb:LC522973 | Organism:Severe | CTTAAGGGTGGTAAAATTGTTAATAATTGGTTGAAGCAGTTAATTAAGTTTACTTGTG | 8599 |
| gb:LC522974 | Organism:Severe | CTTAAGGGTGGTAAAATTGTTAATAATTGGTTGAAGCAGTTAATTAAGTTTACTTGTG | 8599 |
| gb:MN985325 | Organism:Severe | CTTAAGGGTGGTAAAATTGTTAATAATTGGTTGAAGCAGTTAATTAAGTTTACTTGTG | 8602 |
| gb:MT020881 | Organism:Severe | CTTAAGGGTGGTAAAATTGTTAATAATTGGTTGAAGCAGTTAATTAAGTTTACTTGTG | 8602 |
| gb:MT020880 | Organism:Severe | CTTAAGGGTGGTAAAATTGTTAATAATTGGTTGAAGCAGTTAATTAAGTTTACTTGTG | 8602 |
| gb:MT066175 | Organism:Severe | CTTAAGGGTGGTAAAATTGTTAATAATTGGTTGAAGCAGTTAATTAAGTTTACTTGTG | 8602 |
| gb:MN997409 | Organism:Severe | CTTAAGGGTGGTAAAATTGTTAATAATTGGTTGAAGCAGTTAATTAAGTTTACTTGTG | 8602 |
| gb:MN938384 | Organism:Severe | CTTAAGGGTGGTAAAATTGTTAATAATTGGTTGAAGCAGTTAATTAAGTTTACTTGTG | 8570 |
| gb:MT044258 | Organism:Severe | CTTAAGGGTGGTAAAATTGTTAATAATTGGTTGAAGCAGTTAATTAAGTTTACTTGTG | 8578 |
| gb:MT039890 | Organism:Severe | CTTAAGGGTGGTAAAATTGTTAATAATTGGTTGAAGCAGTTAATTAAGTTTACTTGTG | 8602 |
| gb:MN988713 | Organism:Severe | CTTAAGGGTGGTAAAATTGTTAATAATTGGTTGAAGCAGTTAATTAAGTTTACTTGTG | 8602 |
| gb:LC521925 | Organism:Severe | CTTAAGGGTGGTAAAATTGTTAATAATTGGTTGAAGCAGTTAATTAAGTTTACTTGTG | 8575 |
| gb:MT093571 | Organism:Severe | CTTAAGGGTGGTAAAATTGTTAATAATTGGTTGAAGCAGTTAATTAAGTTTACTTGTG | 8602 |
| gb:MT039887 | Organism:Severe | CTTAAGGGTGGTAAAATTGTTAATAATTGGTTGAAGCAGTTAATTAAGTTTACTTGTG | 8602 |
| gb:MT019530 | Organism:Severe | CTTAAGGGTGGTAAAATTGTTAATAATTGGTTGAAGCAGTTAATTAAGTTTACTTGTG | 8602 |
| gb:MT039888 | Organism:Severe | CTTAAGGGTGGTAAAATTGTTAATAATTGGTTGAAGCAGTTAATTAAGTTTACTTGTG | 8602 |
| gb:LC522972 | Organism:Severe | CTTAAGGGTGGTAAAATTGTTAATAATTGGTTGAAGCAGTTAATTAAGTTTACTTGTG | 8599 |
| gb:MT027063 | Organism:Severe | CTTAAGGGTGGTAAAATTGTTAATAATTGGTTGAAGCAGTTAATTAAGTTTACTTGTG | 8602 |
| gb:MT027062 | Organism:Severe | CTTAAGGGTGGTAAAATTGTTAATAATTGGTTGAAGCAGTTAATTAAGTTTACTTGTG | 8602 |
| gb:MT019529 | Organism:Severe | CTTAAGGGTGGTAAAATTGTTAATAATTGGTTGAAGCAGTTAATTAAGTTTACTTGTG | 8602 |
| gb:MN996529 | Organism:Severe | CTTAAGGGTGGTAAAATTGTTAATAATTGGTTGAAGCAGTTAATTAAGTTTACTTGTG | 8590 |
| gb:MN996531 | Organism:Severe | CTTAAGGGTGGTAAAATTGTTAATAATTGGTTGAAGCAGTTAATTAAGTTTACTTGTG | 8589 |
| gb:MT066176 | Organism:Severe | CTTAAGGGTGGTAAAATTGTTAATAATTGGTTGAAGCAGTTAATTAAGTTTACTTGTG | 8602 |
| gb:MT027064 | Organism:Severe | CTTAAGGGTGGTAAAATTGTTAATAATTGGTTGAAGCAGTTAATTAAGTTTACTTGTG | 8602 |
| gb:MN994468 | Organism:Severe | CTTAAGGGTGGTAAAATTGTTAATAATTGGTTGAAGCAGTTAATTAAGTTTACTTGTG | 8602 |
| gb:MT072688 | Organism:Severe | CTTAAGGGTGGTAAAATTGTTAATAATTGGTTGAAGCAGTTAATTAAGTTTACTTGTG | 8587 |
| gb:MN996527 | Organism:Severe | CTTAAGGGTGGTAAAATTGTTAATAATTGGTTGAAGCAGTTAATTAAGTTTACTTGTG | 8569 |
| gb:MT093631 | Organism:Severe | CTTAAGGGTGGTAAAATTGTTAATAATTGGTTGAAGCAGTTAATTAAGTTTACTTGTG | 8640 |
| gb:MT106053 | Organism:Severe | CTTAAGGGTGGTAAAATTGTTAATAATTGGTTGAAGCAGTTAATTAAGTTTACTTGTG | 8602 |
| gb:MT019533 | Organism:Severe | CTTAAGGGTGGTAAAATTGTTAATAATTGGTTGAAGCAGTTAATTAAGTTTACTTGTG | 8602 |
| gb:MT019531 | Organism:Severe | CTTAAGGGTGGTAAAATTGTTAATAATTGGTTGAAGCAGTTAATTAAGTTTACTTGTG | 8602 |
| gb:MN996528 | Organism:Severe | CTTAAGGGTGGTAAAATTGTTAATAATTGGTTGAAGCAGTTAATTAAGTTTACTTGTG | 8602 |
| gb:MN996530 | Organism:Severe | CTTAAGGGTGGTAAAATTGTTAATAATTGGTTGAAGCAGTTAATTAAGTTTACTTGTG | 8588 |
| gb:MN908947 | Organism:Severe | CTTAAGGGTGGTAAAATTGTTAATAATTGGTTGAAGCAGTTAATTAAGTTTACTTGTG | 8602 |
| gb:MT019532 | Organism:Severe | CTTAAGGGTGGTAAAATTGTTAATAATTGGTTGAAGCAGTTAATTAAGTTTACTTGTG | 8602 |

\*\*\*\*\*

|             |                 |                                                             |      |
|-------------|-----------------|-------------------------------------------------------------|------|
| gb:MT020781 | Organism:Severe | TTCCTTTTGTGCTGCTATTTTCTATTTAATAACACCTGTTTCATGTCATGTCTAAACAT | 8650 |
| gb:MT007544 | Organism:Severe | TTCCTTTTGTGCTGCTATTTTCTATTTAATAACACCTGTTTCATGTCATGTCTAAACAT | 8662 |





|             |                 |                                                               |      |
|-------------|-----------------|---------------------------------------------------------------|------|
| gb:MT093571 | Organism:Severe | ACTGACTTTTTCAAGTAAAATCATAGGATACAAGGCTATTGATGGTGGTGTCACTCGTGAC | 8722 |
| gb:MT039887 | Organism:Severe | ACTGACTTTTTCAAGTAAAATCATAGGATACAAGGCTATTGATGGTGGTGTCACTCGTGAC | 8722 |
| gb:MT019530 | Organism:Severe | ACTGACTTTTTCAAGTAAAATCATAGGATACAAGGCTATTGATGGTGGTGTCACTCGTGAC | 8722 |
| gb:MT039888 | Organism:Severe | ACTGACTTTTTCAAGTAAAATCATAGGATACAAGGCTATTGATGGTGGTGTCACTCGTGAC | 8722 |
| gb:LC522972 | Organism:Severe | ACTGACTTTTTCAAGTAAAATCATAGGATACAAGGCTATTGATGGTGGTGTCACTCGTGAC | 8719 |
| gb:MT027063 | Organism:Severe | ACTGACTTTTTCAAGTAAAATCATAGGATACAAGGCTATTGATGGTGGTGTCACTCGTGAC | 8722 |
| gb:MT027062 | Organism:Severe | ACTGACTTTTTCAAGTAAAATCATAGGATACAAGGCTATTGATGGTGGTGTCACTCGTGAC | 8722 |
| gb:MT019529 | Organism:Severe | ACTGACTTTTTCAAGTAAAATCATAGGATACAAGGCTATTGATGGTGGTGTCACTCGTGAC | 8722 |
| gb:MN996529 | Organism:Severe | ACTGACTTTTTCAAGTAAAATCATAGGATACAAGGCTATTGATGGTGGTGTCACTCGTGAC | 8710 |
| gb:MN996531 | Organism:Severe | ACTGACTTTTTCAAGTAAAATCATAGGATACAAGGCTATTGATGGTGGTGTCACTCGTGAC | 8709 |
| gb:MT066176 | Organism:Severe | ACTGACTTTTTCAAGTAAAATCATAGGATACAAGGCTATTGATGGTGGTGTCACTCGTGAC | 8722 |
| gb:MT027064 | Organism:Severe | ACTGACTTTTTCAAGTAAAATCATAGGATACAAGGCTATTGATGGTGGTGTCACTCGTGAC | 8722 |
| gb:MN994468 | Organism:Severe | ACTGACTTTTTCAAGTAAAATCATAGGATACAAGGCTATTGATGGTGGTGTCACTCGTGAC | 8722 |
| gb:MT072688 | Organism:Severe | ACTGACTTTTTCAAGTAAAATCATAGGATACAAGGCTATTGATGGTGGTGTCACTCGTGAC | 8707 |
| gb:MN996527 | Organism:Severe | ACTGACTTTTTCAAGTAAAATCATAGGATACAAGGCTATTGATGGTGGTGTCACTCGTGAC | 8689 |
| gb:MT093631 | Organism:Severe | ACTGACTTTTTCAAGTAAAATCATAGGATACAAGGCTATTGATGGTGGTGTCACTCGTGAC | 8760 |
| gb:MT106053 | Organism:Severe | ACTGACTTTTTCAAGTAAAATCATAGGATACAAGGCTATTGATGGTGGTGTCACTCGTGAC | 8722 |
| gb:MT019533 | Organism:Severe | ACTGACTTTTTCAAGTAAAATCATAGGATACAAGGCTATTGATGGTGGTGTCACTCGTGAC | 8722 |
| gb:MT019531 | Organism:Severe | ACTGACTTTTTCAAGTAAAATCATAGGATACAAGGCTATTGATGGTGGTGTCACTCGTGAC | 8722 |
| gb:MN996528 | Organism:Severe | ACTGACTTTTTCAAGTAAAATCATAGGATACAAGGCTATTGATGGTGGTGTCACTCGTGAC | 8722 |
| gb:MN996530 | Organism:Severe | ACTGACTTTTTCAAGTAAAATCATAGGATACAAGGCTATTGATGGTGGTGTCACTCGTGAC | 8708 |
| gb:MN908947 | Organism:Severe | ACTGACTTTTTCAAGTAAAATCATAGGATACAAGGCTATTGATGGTGGTGTCACTCGTGAC | 8722 |
| gb:MT019532 | Organism:Severe | ACTGACTTTTTCAAGTAAAATCATAGGATACAAGGCTATTGATGGTGGTGTCACTCGTGAC | 8722 |

\*\*\*\*\*

|             |                 |                                                              |      |
|-------------|-----------------|--------------------------------------------------------------|------|
| gb:MT020781 | Organism:Severe | ATAGCATCTACAGATACTTGTTTTGCTAACAAACATGCTGATTTTGACACATGGTTTAGC | 8770 |
| gb:MT007544 | Organism:Severe | ATAGCATCTACAGATACTTGTTTTGCTAACAAACATGCTGATTTTGACACATGGTTTAGC | 8782 |
| gb:MN994467 | Organism:Severe | ATAGCATCTACAGATACTTGTTTTGCTAACAAACATGCTGATTTTGACACATGGTTTAGT | 8782 |
| gb:MT044257 | Organism:Severe | ATAGCATCTACAGATACTTGTTTTGCTAACAAACATGCTGATTTTGACACATGGTTTAGT | 8782 |
| gb:MT106054 | Organism:Severe | ATAGCATCTACAGATACTTGTTTTGCTAACAAACATGCTGATTTTGACACATGGTTTAGT | 8782 |
| gb:MT049951 | Organism:Severe | ATAGCATCTACAGATACTTGTTTTGCTAACAAACATGCTGATTTTGACACATGGTTTAGT | 8782 |
| gb:MN975262 | Organism:Severe | ATAGCATCTACAGATACTTGTTTTGCTAACAAACATGCTGATTTTGACACATGGTTTAGT | 8782 |
| gb:MT106052 | Organism:Severe | ATAGCATCTACAGATACTTGTTTTGCTAACAAACATGCTGATTTTGACACATGGTTTAGT | 8782 |
| gb:LC522975 | Organism:Severe | ATAGCATCTACAGATACTTGTTTTGCTAACAAACATGCTGATTTTGACACATGGTTTAGT | 8779 |
| gb:LC522973 | Organism:Severe | ATAGCATCTACAGATACTTGTTTTGCTAACAAACATGCTGATTTTGACACATGGTTTAGT | 8779 |
| gb:LC522974 | Organism:Severe | ATAGCATCTACAGATACTTGTTTTGCTAACAAACATGCTGATTTTGACACATGGTTTAGT | 8779 |
| gb:MN985325 | Organism:Severe | ATAGCATCTACAGATACTTGTTTTGCTAACAAACATGCTGATTTTGACACATGGTTTAGT | 8782 |
| gb:MT020881 | Organism:Severe | ATAGCATCTACAGATACTTGTTTTGCTAACAAACATGCTGATTTTGACACATGGTTTAGT | 8782 |
| gb:MT020880 | Organism:Severe | ATAGCATCTACAGATACTTGTTTTGCTAACAAACATGCTGATTTTGACACATGGTTTAGT | 8782 |
| gb:MT066175 | Organism:Severe | ATAGCATCTACAGATACTTGTTTTGCTAACAAACATGCTGATTTTGACACATGGTTTAGT | 8782 |
| gb:MN997409 | Organism:Severe | ATAGCATCTACAGATACTTGTTTTGCTAACAAACATGCTGATTTTGACACATGGTTTAGT | 8782 |
| gb:MN938384 | Organism:Severe | ATAGCATCTACAGATACTTGTTTTGCTAACAAACATGCTGATTTTGACACATGGTTTAGT | 8750 |
| gb:MT044258 | Organism:Severe | ATAGCATCTACAGATACTTGTTTTGCTAACAAACATGCTGATTTTGACACATGGTTTAGC | 8758 |
| gb:MT039890 | Organism:Severe | ATAGCATCTACAGATACTTGTTTTGCTAACAAACATGCTGATTTTGACACATGGTTTAGC | 8782 |
| gb:MN988713 | Organism:Severe | ATAGCATCTACAGATACTTGTTTTGCTAACAAACATGCTGATTTTGACACATGGTTTAGY | 8782 |
| gb:LC521925 | Organism:Severe | ATAGCATCTACAGATACTTGTTTTGCTAACAAACATGCTGATTTTGACACATGGTTTAGC | 8755 |
| gb:MT093571 | Organism:Severe | ATAGCATCTACAGATACTTGTTTTGCTAACAAACATGCTGATTTTGACACATGGTTTAGC | 8782 |
| gb:MT039887 | Organism:Severe | ATAGCATCTACAGATACTTGTTTTGCTAACAAACATGCTGATTTTGACACATGGTTTAGC | 8782 |
| gb:MT019530 | Organism:Severe | ATAGCATCTACAGATACTTGTTTTGCTAACAAACATGCTGATTTTGACACATGGTTTAGC | 8782 |
| gb:MT039888 | Organism:Severe | ATAGCATCTACAGATACTTGTTTTGCTAACAAACATGCTGATTTTGACACATGGTTTAGC | 8782 |
| gb:LC522972 | Organism:Severe | ATAGCATCTACAGATACTTGTTTTGCTAACAAACATGCTGATTTTGACACATGGTTTAGC | 8779 |
| gb:MT027063 | Organism:Severe | ATAGCATCTACAGATACTTGTTTTGCTAACAAACATGCTGATTTTGACACATGGTTTAGC | 8782 |
| gb:MT027062 | Organism:Severe | ATAGCATCTACAGATACTTGTTTTGCTAACAAACATGCTGATTTTGACACATGGTTTAGC | 8782 |
| gb:MT019529 | Organism:Severe | ATAGCATCTACAGATACTTGTTTTGCTAACAAACATGCTGATTTTGACACATGGTTTAGC | 8782 |
| gb:MN996529 | Organism:Severe | ATAGCATCTACAGATACTTGTTTTGCTAACAAACATGCTGATTTTGACACATGGTTTAGC | 8770 |
| gb:MN996531 | Organism:Severe | ATAGCATCTACAGATACTTGTTTTGCTAACAAACATGCTGATTTTGACACATGGTTTAGC | 8769 |
| gb:MT066176 | Organism:Severe | ATAGCATCTACAGATACTTGTTTTGCTAACAAACATGCTGATTTTGACACATGGTTTAGC | 8782 |
| gb:MT027064 | Organism:Severe | ATAGCATCTACAGATACTTGTTTTGCTAACAAACATGCTGATTTTGACACATGGTTTAGC | 8782 |
| gb:MN994468 | Organism:Severe | ATAGCATCTACAGATACTTGTTTTGCTAACAAACATGCTGATTTTGACACATGGTTTAGC | 8782 |
| gb:MT072688 | Organism:Severe | ATAGCATCTACAGATACTTGTTTTGCTAACAAACATGCTGATTTTGACACATGGTTTAGC | 8767 |
| gb:MN996527 | Organism:Severe | ATAGCATCTACAGATACTTGTTTTGCTAACAAACATGCTGATTTTGACACATGGTTTAGC | 8749 |
| gb:MT093631 | Organism:Severe | ATAGCATCTACAGATACTTGTTTTGCTAACAAACATGCTGATTTTGACACATGGTTTAGC | 8820 |
| gb:MT106053 | Organism:Severe | ATAGCATCTACAGATACTTGTTTTGCTAACAAACATGCTGATTTTGACACATGGTTTAGC | 8782 |
| gb:MT019533 | Organism:Severe | ATAGCATCTACAGATACTTGTTTTGCTAACAAACATGCTGATTTTGACACATGGTTTAGC | 8782 |
| gb:MT019531 | Organism:Severe | ATAGCATCTACAGATACTTGTTTTGCTAACAAACATGCTGATTTTGACACATGGTTTAGC | 8782 |

|             |                  |                                                                |      |
|-------------|------------------|----------------------------------------------------------------|------|
| gb:MN996528 | Organism: Severe | ATAGCATCTACAGATACTTGTGTTTGTCTAACAAACATGCTGATTTTGACACATGGTTTAGC | 8782 |
| gb:MN996530 | Organism: Severe | ATAGCATCTACAGATACTTGTGTTTGTCTAACAAACATGCTGATTTTGACACATGGTTTAGC | 8768 |
| gb:MN908947 | Organism: Severe | ATAGCATCTACAGATACTTGTGTTTGTCTAACAAACATGCTGATTTTGACACATGGTTTAGC | 8782 |
| gb:MT019532 | Organism: Severe | ATAGCATCTACAGATACTTGTGTTTGTCTAACAAACATGCTGATTTTGACACATGGTTTAGC | 8782 |
| *****       |                  |                                                                |      |
| gb:MT020781 | Organism: Severe | CAGCGTGGTGGTAGTTATACTAATGACAAAGCTTGCCCATTTGATTGCTGCAGTCATAACA  | 8830 |
| gb:MT007544 | Organism: Severe | CAGCGTGGTGGTAGTTATACTAATGACAAAGCTTGCCCATTTGATTGCTGCAGTCATAACA  | 8842 |
| gb:MN994467 | Organism: Severe | CAGCGTGGTGGTAGTTATACTAATGACAAAGCTTGCCCATTTGATTGCTGCAGTCATAACA  | 8842 |
| gb:MT044257 | Organism: Severe | CAGCGTGGTGGTAGTTATACTAATGACAAAGCTTGCCCATTTGATTGCTGCAGTCATAACA  | 8842 |
| gb:MT106054 | Organism: Severe | CAGCGTGGTGGTAGTTATACTAATGACAAAGCTTGCCCATTTGATTGCTGCAGTCATAACA  | 8842 |
| gb:MT049951 | Organism: Severe | CAGCGTGGTGGTAGTTATACTAATGACAAAGCTTGCCCATTTGATTGCTGCAGTCATAACA  | 8842 |
| gb:MN975262 | Organism: Severe | CAGCGTGGTGGTAGTTATACTAATGACAAAGCTTGCCCATTTGATTGCTGCAGTCATAACA  | 8842 |
| gb:MT106052 | Organism: Severe | CAGCGTGGTGGTAGTTATACTAATGACAAAGCTTGCCCATTTGATTGCTGCAGTCATAACA  | 8842 |
| gb:LC522975 | Organism: Severe | CAGCGTGGTGGTAGTTATACTAATGACAAAGCTTGCCCATTTGATTGCTGCAGTCATAACA  | 8839 |
| gb:LC522973 | Organism: Severe | CAGCGTGGTGGTAGTTATACTAATGACAAAGCTTGCCCATTTGATTGCTGCAGTCATAACA  | 8839 |
| gb:LC522974 | Organism: Severe | CAGCGTGGTGGTAGTTATACTAATGACAAAGCTTGCCCATTTGATTGCTGCAGTCATAACA  | 8839 |
| gb:MN985325 | Organism: Severe | CAGCGTGGTGGTAGTTATACTAATGACAAAGCTTGCCCATTTGATTGCTGCAGTCATAACA  | 8842 |
| gb:MT020881 | Organism: Severe | CAGCGTGGTGGTAGTTATACTAATGACAAAGCTTGCCCATTTGATTGCTGCAGTCATAACA  | 8842 |
| gb:MT020880 | Organism: Severe | CAGCGTGGTGGTAGTTATACTAATGACAAAGCTTGCCCATTTGATTGCTGCAGTCATAACA  | 8842 |
| gb:MT066175 | Organism: Severe | CAGCGTGGTGGTAGTTATACTAATGACAAAGCTTGCCCATTTGATTGCTGCAGTCATAACA  | 8842 |
| gb:MN997409 | Organism: Severe | CAGCGTGGTGGTAGTTATACTAATGACAAAGCTTGCCCATTTGATTGCTGCAGTCATAACA  | 8842 |
| gb:MN938384 | Organism: Severe | CAGCGTGGTGGTAGTTATACTAATGACAAAGCTTGCCCATTTGATTGCTGCAGTCATAACA  | 8810 |
| gb:MT044258 | Organism: Severe | CAGCGTGGTGGTAGTTATACTAATGACAAAGCTTGCCCATTTGATTGCTGCAGTCATAACA  | 8818 |
| gb:MT039890 | Organism: Severe | CAGCGTGGTGGTAGTTATACTAATGACAAAGCTTGCCCATTTGATTGCTGCAGTCATAACA  | 8842 |
| gb:MN988713 | Organism: Severe | CAGCGTGGTGGTAGTTATACTAATGACAAAGCTTGCCCATTTGATTGCTGCAGTCATAACA  | 8842 |
| gb:LC521925 | Organism: Severe | CAGCGTGGTGGTAGTTATACTAATGACAAAGCTTGCCCATTTGATTGCTGCAGTCATAACA  | 8815 |
| gb:MT093571 | Organism: Severe | CAGCGTGGTGGTAGTTATACTAATGACAAAGCTTGCCCATTTGATTGCTGCAGTCATAACA  | 8842 |
| gb:MT039887 | Organism: Severe | CAGCGTGGTGGTAGTTATACTAATGACAAAGCTTGCCCATTTGATTGCTGCAGTCATAACA  | 8842 |
| gb:MT019530 | Organism: Severe | CAGCGTGGTGGTAGTTATACTAATGACAAAGCTTGCCCATTTGATTGCTGCAGTCATAACA  | 8842 |
| gb:MT039888 | Organism: Severe | CAGCGTGGTGGTAGTTATACTAATGACAAAGCTTGCCCATTTGATTGCTGCAGTCATAACA  | 8842 |
| gb:LC522972 | Organism: Severe | CAGCGTGGTGGTAGTTATACTAATGACAAAGCTTGCCCATTTGATTGCTGCAGTCATAACA  | 8839 |
| gb:MT027063 | Organism: Severe | CAGCGTGGTGGTAGTTATACTAATGACAAAGCTTGCCCATTTGATTGCTGCAGTCATAACA  | 8842 |
| gb:MT027062 | Organism: Severe | CAGCGTGGTGGTAGTTATACTAATGACAAAGCTTGCCCATTTGATTGCTGCAGTCATAACA  | 8842 |
| gb:MT019529 | Organism: Severe | CAGCGTGGTGGTAGTTATACTAATGACAAAGCTTGCCCATTTGATTGCTGCAGTCATAACA  | 8842 |
| gb:MN996529 | Organism: Severe | CAGCGTGGTGGTAGTTATACTAATGACAAAGCTTGCCCATTTGATTGCTGCAGTCATAACA  | 8830 |
| gb:MN996531 | Organism: Severe | CAGCGTGGTGGTAGTTATACTAATGACAAAGCTTGCCCATTTGATTGCTGCAGTCATAACA  | 8829 |
| gb:MT066176 | Organism: Severe | CAGCGTGGTGGTAGTTATACTAATGACAAAGCTTGCCCATTTGATTGCTGCAGTCATAACA  | 8842 |
| gb:MT027064 | Organism: Severe | CAGCGTGGTGGTAGTTATACTAATGACAAAGCTTGCCCATTTGATTGCTGCAGTCATAACA  | 8842 |
| gb:MN994468 | Organism: Severe | CAGCGTGGTGGTAGTTATACTAATGACAAAGCTTGCCCATTTGATTGCTGCAGTCATAACA  | 8842 |
| gb:MT072688 | Organism: Severe | CAGCGTGGTGGTAGTTATACTAATGACAAAGCTTGCCCATTTGATTGCTGCAGTCATAACA  | 8827 |
| gb:MN996527 | Organism: Severe | CAGCGTGGTGGTAGTTATACTAATGACAAAGCTTGCCCATTTGATTGCTGCAGTCATAACA  | 8809 |
| gb:MT093631 | Organism: Severe | CAGCGTGGTGGTAGTTATACTAATGACAAAGCTTGCCCATTTGATTGCTGCAGTCATAACA  | 8880 |
| gb:MT106053 | Organism: Severe | CAGCGTGGTGGTAGTTATACTAATGACAAAGCTTGCCCATTTGATTGCTGCAGTCATAACA  | 8842 |
| gb:MT019533 | Organism: Severe | CAGCGTGGTGGTAGTTATACTAATGACAAAGCTTGCCCATTTGATTGCTGCAGTCATAACA  | 8842 |
| gb:MT019531 | Organism: Severe | CAGCGTGGTGGTAGTTATACTAATGACAAAGCTTGCCCATTTGATTGCTGCAGTCATAACA  | 8842 |
| gb:MN996528 | Organism: Severe | CAGCGTGGTGGTAGTTATACTAATGACAAAGCTTGCCCATTTGATTGCTGCAGTCATAACA  | 8842 |
| gb:MN996530 | Organism: Severe | CAGCGTGGTGGTAGTTATACTAATGACAAAGCTTGCCCATTTGATTGCTGCAGTCATAACA  | 8828 |
| gb:MN908947 | Organism: Severe | CAGCGTGGTGGTAGTTATACTAATGACAAAGCTTGCCCATTTGATTGCTGCAGTCATAACA  | 8842 |
| gb:MT019532 | Organism: Severe | CAGCGTGGTGGTAGTTATACTAATGACAAAGCTTGCCCATTTGATTGCTGCAGTCATAACA  | 8842 |
| *****       |                  |                                                                |      |
| gb:MT020781 | Organism: Severe | AGAGAAGTGGGTTTTGTCGTGCCTGGTTTGCTGGCAGGATATTACGCACAAC TAATGGT   | 8890 |
| gb:MT007544 | Organism: Severe | AGAGAAGTGGGTTTTGTCGTGCCTGGTTTGCTGGCAGGATATTACGCACAAC TAATGGT   | 8902 |
| gb:MN994467 | Organism: Severe | AGAGAAGTGGGTTTTGTCGTGCCTGGTTTGCTGGCAGGATATTACGCACAAC TAATGGT   | 8902 |
| gb:MT044257 | Organism: Severe | AGAGAAGTGGGTTTTGTCGTGCCTGGTTTGCTGGCAGGATATTACGCACAAC TAATGGT   | 8902 |
| gb:MT106054 | Organism: Severe | AGAGAAGTGGGTTTTGTCGTGCCTGGTTTGCTGGCAGGATATTACGCACAAC TAATGGT   | 8902 |
| gb:MT049951 | Organism: Severe | AGAGAAGTGGGTTTTGTCGTGCCTGGTTTGCTGGCAGGATATTACGCACAAC TAATGGT   | 8902 |
| gb:MN975262 | Organism: Severe | AGAGAAGTGGGTTTTGTCGTGCCTGGTTTGCTGGCAGGATATTACGCACAAC TAATGGT   | 8902 |
| gb:MT106052 | Organism: Severe | AGAGAAGTGGGTTTTGTCGTGCCTGGTTTGCTGGCAGGATATTACGCACAAC TAATGGT   | 8902 |
| gb:LC522975 | Organism: Severe | AGAGAAGTGGGTTTTGTCGTGCCTGGTTTGCTGGCAGGATATTACGCACAAC TAATGGT   | 8899 |
| gb:LC522973 | Organism: Severe | AGAGAAGTGGGTTTTGTCGTGCCTGGTTTGCTGGCAGGATATTACGCACAAC TAATGGT   | 8899 |
| gb:LC522974 | Organism: Severe | AGAGAAGTGGGTTTTGTCGTGCCTGGTTTGCTGGCAGGATATTACGCACAAC TAATGGT   | 8899 |
| gb:MN985325 | Organism: Severe | AGAGAAGTGGGTTTTGTCGTGCCTGGTTTGCTGGCAGGATATTACGCACAAC TAATGGT   | 8902 |
| gb:MT020881 | Organism: Severe | AGAGAAGTGGGTTTTGTCGTGCCTGGTTTGCTGGCAGGATATTACGCACAAC TAATGGT   | 8902 |

|             |                 |                                                               |      |
|-------------|-----------------|---------------------------------------------------------------|------|
| gb:MT020880 | Organism:Severe | AGAGAAGTGGGTTTTGTCGTGCCTGGTTTGCCTGGCACGATATTACGCACAAC TAATGGT | 8902 |
| gb:MT066175 | Organism:Severe | AGAGAAGTGGGTTTTGTCGTGCCTGGTTTGCCTGGCACGATATTACGCACAAC TAATGGT | 8902 |
| gb:MN997409 | Organism:Severe | AGAGAAGTGGGTTTTGTCGTGCCTGGTTTGCCTGGCACGATATTACGCACAAC TAATGGT | 8902 |
| gb:MN938384 | Organism:Severe | AGAGAAGTGGGTTTTGTCGTGCCTGGTTTGCCTGGCACGATATTACGCACAAC TAATGGT | 8870 |
| gb:MT044258 | Organism:Severe | AGAGAAGTGGGTTTTGTCGTGCCTGGTTTGCCTGGCACGATATTACGCACAAC TAATGGT | 8878 |
| gb:MT039890 | Organism:Severe | AGAGAAGTGGGTTTTGTCGTGCCTGGTTTGCCTGGCACGATATTACGCACAAC TAATGGT | 8902 |
| gb:MN988713 | Organism:Severe | AGAGAAGTGGGTTTTGTCGTGCCTGGTTTGCCTGGCACGATATTACGCACAAC TAATGGT | 8902 |
| gb:LC521925 | Organism:Severe | AGAGAAGTGGGTTTTGTCGTGCCTGGTTTGCCTGGCACGATATTACGCACAAC TAATGGT | 8875 |
| gb:MT093571 | Organism:Severe | AGAGAAGTGGGTTTTGTCGTGCCTGGTTTGCCTGGCACGATATTACGCACAAC TAATGGT | 8902 |
| gb:MT039887 | Organism:Severe | AGAGAAGTGGGTTTTGTCGTGCCTGGTTTGCCTGGCACGATATTACGCACAAC TAATGGT | 8902 |
| gb:MT019530 | Organism:Severe | AGAGAAGTGGGTTTTGTCGTGCCTGGTTTGCCTGGCACGATATTACGCACAAC TAATGGT | 8902 |
| gb:MT039888 | Organism:Severe | AGAGAAGTGGGTTTTGTCGTGCCTGGTTTGCCTGGCACGATATTACGCACAAC TAATGGT | 8902 |
| gb:LC522972 | Organism:Severe | AGAGAAGTGGGTTTTGTCGTGCCTGGTTTGCCTGGCACGATATTACGCACAAC TAATGGT | 8899 |
| gb:MT027063 | Organism:Severe | AGAGAAGTGGGTTTTGTCGTGCCTGGTTTGCCTGGCACGATATTACGCACAAC TAATGGT | 8902 |
| gb:MT027062 | Organism:Severe | AGAGAAGTGGGTTTTGTCGTGCCTGGTTTGCCTGGCACGATATTACGCACAAC TAATGGT | 8902 |
| gb:MT019529 | Organism:Severe | AGAGAAGTGGGTTTTGTCGTGCCTGGTTTGCCTGGCACGATATTACGCACAAC TAATGGT | 8902 |
| gb:MN996529 | Organism:Severe | AGAGAAGTGGGTTTTGTCGTGCCTGGTTTGCCTGGCACGATATTACGCACAAC TAATGGT | 8890 |
| gb:MN996531 | Organism:Severe | AGAGAAGTGGGTTTTGTCGTGCCTGGTTTGCCTGGCACGATATTACGCACAAC TAATGGT | 8889 |
| gb:MT066176 | Organism:Severe | AGAGAAGTGGGTTTTGTCGTGCCTGGTTTGCCTGGCACGATATTACGCACAAC TAATGGT | 8902 |
| gb:MT027064 | Organism:Severe | AGAGAAGTGGGTTTTGTCGTGCCTGGTTTGCCTGGCACGATATTACGCACAAC TAATGGT | 8902 |
| gb:MN994468 | Organism:Severe | AGAGAAGTGGGTTTTGTCGTGCCTGGTTTGCCTGGCACGATATTACGCACAAC TAATGGT | 8902 |
| gb:MT072688 | Organism:Severe | AGAGAAGTGGGTTTTGTCGTGCCTGGTTTGCCTGGCACGATATTACGCACAAC TAATGGT | 8887 |
| gb:MN996527 | Organism:Severe | AGAGAAGTGGGTTTTGTCGTGCCTGGTTTGCCTGGCACGATATTACGCACAAC TAATGGT | 8869 |
| gb:MT093631 | Organism:Severe | AGAGAAGTGGGTTTTGTCGTGCCTGGTTTGCCTGGCACGATATTACGCACAAC TAATGGT | 8940 |
| gb:MT106053 | Organism:Severe | AGAGAAGTGGGTTTTGTCGTGCCTGGTTTGCCTGGCACGATATTACGCACAAC TAATGGT | 8902 |
| gb:MT019533 | Organism:Severe | AGAGAAGTGGGTTTTGTCGTGCCTGGTTTGCCTGGCACGATATTACGCACAAC TAATGGT | 8902 |
| gb:MT019531 | Organism:Severe | AGAGAAGTGGGTTTTGTCGTGCCTGGTTTGCCTGGCACGATATTACGCACAAC TAATGGT | 8902 |
| gb:MN996528 | Organism:Severe | AGAGAAGTGGGTTTTGTCGTGCCTGGTTTGCCTGGCACGATATTACGCACAAC TAATGGT | 8902 |
| gb:MN996530 | Organism:Severe | AGAGAAGTGGGTTTTGTCGTGCCTGGTTTGCCTGGCACGATATTACGCACAAC TAATGGT | 8888 |
| gb:MN908947 | Organism:Severe | AGAGAAGTGGGTTTTGTCGTGCCTGGTTTGCCTGGCACGATATTACGCACAAC TAATGGT | 8902 |
| gb:MT019532 | Organism:Severe | AGAGAAGTGGGTTTTGTCGTGCCTGGTTTGCCTGGCACGATATTACGCACAAC TAATGGT | 8902 |

\*\*\*\*\*

|             |                 |                                                              |      |
|-------------|-----------------|--------------------------------------------------------------|------|
| gb:MT020781 | Organism:Severe | GACTTTTTGCATTTCTTACCTAGAGTTTTTAGTGCAGTTGGTAACATCTGTTACACACCA | 8950 |
| gb:MT007544 | Organism:Severe | GACTTTTTGCATTTCTTACCTAGAGTTTTTAGTGCAGTTGGTAACATCTGTTACACACCA | 8962 |
| gb:MN994467 | Organism:Severe | GACTTTTTGCATTTCTTACCTAGAGTTTTTAGTGCAGTTGGTAACATCTGTTACACACCA | 8962 |
| gb:MT044257 | Organism:Severe | GACTTTTTGCATTTCTTACCTAGAGTTTTTAGTGCAGTTGGTAACATCTGTTACACACCA | 8962 |
| gb:MT106054 | Organism:Severe | GACTTTTTGCATTTCTTACCTAGAGTTTTTAGTGCAGTTGGTAACATCTGTTACACACCA | 8962 |
| gb:MT049951 | Organism:Severe | GACTTTTTGCATTTCTTACCTAGAGTTTTTAGTGCAGTTGGTAACATCTGTTACACACCA | 8962 |
| gb:MN975262 | Organism:Severe | GACTTTTTGCATTTCTTACCTAGAGTTTTTAGTGCAGTTGGTAACATCTGTTACACACCA | 8962 |
| gb:MT106052 | Organism:Severe | GACTTTTTGCATTTCTTACCTAGAGTTTTTAGTGCAGTTGGTAACATCTGTTACACACCA | 8962 |
| gb:LC522975 | Organism:Severe | GACTTTTTGCATTTCTTACCTAGAGTTTTTAGTGCAGTTGGTAACATCTGTTACACACCA | 8959 |
| gb:LC522973 | Organism:Severe | GACTTTTTGCATTTCTTACCTAGAGTTTTTAGTGCAGTTGGTAACATCTGTTACACACCA | 8959 |
| gb:LC522974 | Organism:Severe | GACTTTTTGCATTTCTTACCTAGAGTTTTTAGTGCAGTTGGTAACATCTGTTACACACCA | 8959 |
| gb:MN985325 | Organism:Severe | GACTTTTTGCATTTCTTACCTAGAGTTTTTAGTGCAGTTGGTAACATCTGTTACACACCA | 8962 |
| gb:MT020881 | Organism:Severe | GACTTTTTGCATTTCTTACCTAGAGTTTTTAGTGCAGTTGGTAACATCTGTTACACACCA | 8962 |
| gb:MT020880 | Organism:Severe | GACTTTTTGCATTTCTTACCTAGAGTTTTTAGTGCAGTTGGTAACATCTGTTACACACCA | 8962 |
| gb:MT066175 | Organism:Severe | GACTTTTTGCATTTCTTACCTAGAGTTTTTAGTGCAGTTGGTAACATCTGTTACACACCA | 8962 |
| gb:MN997409 | Organism:Severe | GACTTTTTGCATTTCTTACCTAGAGTTTTTAGTGCAGTTGGTAACATCTGTTACACACCA | 8962 |
| gb:MN938384 | Organism:Severe | GACTTTTTGCATTTCTTACCTAGAGTTTTTAGTGCAGTTGGTAACATCTGTTACACACCA | 8962 |
| gb:MT044258 | Organism:Severe | GACTTTTTGCATTTCTTACCTAGAGTTTTTAGTGCAGTTGGTAACATCTGTTACACACCA | 8930 |
| gb:MT039890 | Organism:Severe | GACTTTTTGCATTTCTTACCTAGAGTTTTTAGTGCAGTTGGTAACATCTGTTACACACCA | 8938 |
| gb:MN988713 | Organism:Severe | GACTTTTTGCATTTCTTACCTAGAGTTTTTAGTGCAGTTGGTAACATCTGTTACACACCA | 8962 |
| gb:LC521925 | Organism:Severe | GACTTTTTGCATTTCTTACCTAGAGTTTTTAGTGCAGTTGGTAACATCTGTTACACACCA | 8962 |
| gb:MT093571 | Organism:Severe | GACTTTTTGCATTTCTTACCTAGAGTTTTTAGTGCAGTTGGTAACATCTGTTACACACCA | 8935 |
| gb:MT039887 | Organism:Severe | GACTTTTTGCATTTCTTACCTAGAGTTTTTAGTGCAGTTGGTAACATCTGTTACACACCA | 8962 |
| gb:MT019530 | Organism:Severe | GACTTTTTGCATTTCTTACCTAGAGTTTTTAGTGCAGTTGGTAACATCTGTTACACACCA | 8962 |
| gb:MT039888 | Organism:Severe | GACTTTTTGCATTTCTTACCTAGAGTTTTTAGTGCAGTTGGTAACATCTGTTACACACCA | 8962 |
| gb:LC522972 | Organism:Severe | GACTTTTTGCATTTCTTACCTAGAGTTTTTAGTGCAGTTGGTAACATCTGTTACACACCA | 8962 |
| gb:MT027063 | Organism:Severe | GACTTTTTGCATTTCTTACCTAGAGTTTTTAGTGCAGTTGGTAACATCTGTTACACACCA | 8959 |
| gb:MT027062 | Organism:Severe | GACTTTTTGCATTTCTTACCTAGAGTTTTTAGTGCAGTTGGTAACATCTGTTACACACCA | 8962 |
| gb:MT019529 | Organism:Severe | GACTTTTTGCATTTCTTACCTAGAGTTTTTAGTGCAGTTGGTAACATCTGTTACACACCA | 8962 |
| gb:MN996529 | Organism:Severe | GACTTTTTGCATTTCTTACCTAGAGTTTTTAGTGCAGTTGGTAACATCTGTTACACACCA | 8962 |
| gb:MN996531 | Organism:Severe | GACTTTTTGCATTTCTTACCTAGAGTTTTTAGTGCAGTTGGTAACATCTGTTACACACCA | 8950 |
| gb:MT066176 | Organism:Severe | GACTTTTTGCATTTCTTACCTAGAGTTTTTAGTGCAGTTGGTAACATCTGTTACACACCA | 8949 |
| gb:MT066176 | Organism:Severe | GACTTTTTGCATTTCTTACCTAGAGTTTTTAGTGCAGTTGGTAACATCTGTTACACACCA | 8962 |

|             |                 |                                                             |      |
|-------------|-----------------|-------------------------------------------------------------|------|
| gb:MT027064 | Organism:Severe | GACTTTTTGCATTTCTTACCTAGAGTTTTAGTGCAGTTGGTAACATCTGTTACACACCA | 8962 |
| gb:MN994468 | Organism:Severe | GACTTTTTGCATTTCTTACCTAGAGTTTTAGTGCAGTTGGTAACATCTGTTACACACCA | 8962 |
| gb:MT072688 | Organism:Severe | GACTTTTTGCATTTCTTACCTAGAGTTTTAGTGCAGTTGGTAACATCTGTTACACACCA | 8947 |
| gb:MN996527 | Organism:Severe | GACTTTTTGCATTTCTTACCTAGAGTTTTAGTGCAGTTGGTAACATCTGTTACACACCA | 8929 |
| gb:MT093631 | Organism:Severe | GACTTTTTGCATTTCTTACCTAGAGTTTTAGTGCAGTTGGTAACATCTGTTACACACCA | 9000 |
| gb:MT106053 | Organism:Severe | GACTTTTTGCATTTCTTACCTAGAGTTTTAGTGCAGTTGGTAACATCTGTTACACACCA | 8962 |
| gb:MT019533 | Organism:Severe | GACTTTTTGCATTTCTTACCTAGAGTTTTAGTGCAGTTGGTAACATCTGTTACACACCA | 8962 |
| gb:MT019531 | Organism:Severe | GACTTTTTGCATTTCTTACCTAGAGTTTTAGTGCAGTTGGTAACATCTGTTACACACCA | 8962 |
| gb:MN996528 | Organism:Severe | GACTTTTTGCATTTCTTACCTAGAGTTTTAGTGCAGTTGGTAACATCTGTTACACACCA | 8962 |
| gb:MN996530 | Organism:Severe | GACTTTTTGCATTTCTTACCTAGAGTTTTAGTGCAGTTGGTAACATCTGTTACACACCA | 8948 |
| gb:MN908947 | Organism:Severe | GACTTTTTGCATTTCTTACCTAGAGTTTTAGTGCAGTTGGTAACATCTGTTACACACCA | 8962 |
| gb:MT019532 | Organism:Severe | GACTTTTTGCATTTCTTACCTAGAGTTTTAGTGCAGTTGGTAACATCTGTTACACACCA | 8962 |

\*\*\*\*\*

|             |                 |                                                              |      |
|-------------|-----------------|--------------------------------------------------------------|------|
| gb:MT020781 | Organism:Severe | TCAAACCTTATAGAGTACACTGACTTTGCAACATCAGCTTGTGTTTTGGCTGCTGAATGT | 9010 |
| gb:MT007544 | Organism:Severe | TCAAACCTTATAGAGTACACTGACTTTGCAACATCAGCTTGTGTTTTGGCTGCTGAATGT | 9022 |
| gb:MN994467 | Organism:Severe | TCAAACCTTATAGAGTACACTGACTTTGCAACATCAGCTTGTGTTTTGGCTGCTGAATGT | 9022 |
| gb:MT044257 | Organism:Severe | TCAAACCTTATAGAGTACACTGACTTTGCAACATCAGCTTGTGTTTTGGCTGCTGAATGT | 9022 |
| gb:MT106054 | Organism:Severe | TCAAACCTTATAGAGTACACTGACTTTGCAACATCAGCTTGTGTTTTGGCTGCTGAATGT | 9022 |
| gb:MT049951 | Organism:Severe | TCAAACCTTATAGAGTACACTGACTTTGCAACATCAGCTTGTGTTTTGGCTGCTGAATGT | 9022 |
| gb:MN975262 | Organism:Severe | TCAAACCTTATAGAGTACACTGACTTTGCAACATCAGCTTGTGTTTTGGCTGCTGAATGT | 9022 |
| gb:MT106052 | Organism:Severe | TCAAACCTTATAGAGTACACTGACTTTGCAACATCAGCTTGTGTTTTGGCTGCTGAATGT | 9022 |
| gb:LC522975 | Organism:Severe | TCAAACCTTATAGAGTACACTGACTTTGCAACATCAGCTTGTGTTTTGGCTGCTGAATGT | 9019 |
| gb:LC522973 | Organism:Severe | TCAAACCTTATAGAGTACACTGACTTTGCAACATCAGCTTGTGTTTTGGCTGCTGAATGT | 9019 |
| gb:LC522974 | Organism:Severe | TCAAACCTTATAGAGTACACTGACTTTGCAACATCAGCTTGTGTTTTGGCTGCTGAATGT | 9019 |
| gb:MN985325 | Organism:Severe | TCAAACCTTATAGAGTACACTGACTTTGCAACATCAGCTTGTGTTTTGGCTGCTGAATGT | 9022 |
| gb:MT020881 | Organism:Severe | TCAAACCTTATAGAGTACACTGACTTTGCAACATCAGCTTGTGTTTTGGCTGCTGAATGT | 9022 |
| gb:MT020880 | Organism:Severe | TCAAACCTTATAGAGTACACTGACTTTGCAACATCAGCTTGTGTTTTGGCTGCTGAATGT | 9022 |
| gb:MT066175 | Organism:Severe | TCAAACCTTATAGAGTACACTGACTTTGCAACATCAGCTTGTGTTTTGGCTGCTGAATGT | 9022 |
| gb:MN997409 | Organism:Severe | TCAAACCTTATAGAGTACACTGACTTTGCAACATCAGCTTGTGTTTTGGCTGCTGAATGT | 9022 |
| gb:MN938384 | Organism:Severe | TCAAACCTTATAGAGTACACTGACTTTGCAACATCAGCTTGTGTTTTGGCTGCTGAATGT | 8990 |
| gb:MT044258 | Organism:Severe | TCAAACCTTATAGAGTACACTGACTTTGCAACATCAGCTTGTGTTTTGGCTGCTGAATGT | 8998 |
| gb:MT039890 | Organism:Severe | TCAAACCTTATAGAGTACACTGACTTTGCAACATCAGCTTGTGTTTTGGCTGCTGAATGT | 9022 |
| gb:MN988713 | Organism:Severe | TCAAACCTTATAGAGTACACTGACTTTGCAACATCAGCTTGTGTTTTGGCTGCTGAATGT | 9022 |
| gb:LC521925 | Organism:Severe | TCAAACCTTATAGAGTACACTGACTTTGCAACATCAGCTTGTGTTTTGGCTGCTGAATGT | 8995 |
| gb:MT093571 | Organism:Severe | TCAAACCTTATAGAGTACACTGACTTTGCAACATCAGCTTGTGTTTTGGCTGCTGAATGT | 9022 |
| gb:MT039887 | Organism:Severe | TCAAACCTTATAGAGTACACTGACTTTGCAACATCAGCTTGTGTTTTGGCTGCTGAATGT | 9022 |
| gb:MT019530 | Organism:Severe | TCAAACCTTATAGAGTACACTGACTTTGCAACATCAGCTTGTGTTTTGGCTGCTGAATGT | 9022 |
| gb:MT039888 | Organism:Severe | TCAAACCTTATAGAGTACACTGACTTTGCAACATCAGCTTGTGTTTTGGCTGCTGAATGT | 9022 |
| gb:LC522972 | Organism:Severe | TCAAACCTTATAGAGTACACTGACTTTGCAACATCAGCTTGTGTTTTGGCTGCTGAATGT | 9019 |
| gb:MT027063 | Organism:Severe | TCAAACCTTATAGAGTACACTGACTTTGCAACATCAGCTTGTGTTTTGGCTGCTGAATGT | 9022 |
| gb:MT027062 | Organism:Severe | TCAAACCTTATAGAGTACACTGACTTTGCAACATCAGCTTGTGTTTTGGCTGCTGAATGT | 9022 |
| gb:MT019529 | Organism:Severe | TCAAACCTTATAGAGTACACTGACTTTGCAACATCAGCTTGTGTTTTGGCTGCTGAATGT | 9022 |
| gb:MN996529 | Organism:Severe | TCAAACCTTATAGAGTACACTGACTTTGCAACATCAGCTTGTGTTTTGGCTGCTGAATGT | 9010 |
| gb:MN996531 | Organism:Severe | TCAAACCTTATAGAGTACACTGACTTTGCAACATCAGCTTGTGTTTTGGCTGCTGAATGT | 9009 |
| gb:MT066176 | Organism:Severe | TCAAACCTTATAGAGTACACTGACTTTGCAACATCAGCTTGTGTTTTGGCTGCTGAATGT | 9022 |
| gb:MT027064 | Organism:Severe | TCAAACCTTATAGAGTACACTGACTTTGCAACATCAGCTTGTGTTTTGGCTGCTGAATGT | 9022 |
| gb:MN994468 | Organism:Severe | TCAAACCTTATAGAGTACACTGACTTTGCAACATCAGCTTGTGTTTTGGCTGCTGAATGT | 9022 |
| gb:MT072688 | Organism:Severe | TCAAACCTTATAGAGTACACTGACTTTGCAACATCAGCTTGTGTTTTGGCTGCTGAATGT | 9007 |
| gb:MN996527 | Organism:Severe | TCAAACCTTATAGAGTACACTGACTTTGCAACATCAGCTTGTGTTTTGGCTGCTGAATGT | 8989 |
| gb:MT093631 | Organism:Severe | TCAAACCTTATAGAGTACACTGACTTTGCAACATCAGCTTGTGTTTTGGCTGCTGAATGT | 9060 |
| gb:MT106053 | Organism:Severe | TCAAACCTTATAGAGTACACTGACTTTGCAACATCAGCTTGTGTTTTGGCTGCTGAATGT | 9022 |
| gb:MT019533 | Organism:Severe | TCAAACCTTATAGAGTACACTGACTTTGCAACATCAGCTTGTGTTTTGGCTGCTGAATGT | 9022 |
| gb:MT019531 | Organism:Severe | TCAAACCTTATAGAGTACACTGACTTTGCAACATCAGCTTGTGTTTTGGCTGCTGAATGT | 9022 |
| gb:MN996528 | Organism:Severe | TCAAACCTTATAGAGTACACTGACTTTGCAACATCAGCTTGTGTTTTGGCTGCTGAATGT | 9022 |
| gb:MN996530 | Organism:Severe | TCAAACCTTATAGAGTACACTGACTTTGCAACATCAGCTTGTGTTTTGGCTGCTGAATGT | 9008 |
| gb:MN908947 | Organism:Severe | TCAAACCTTATAGAGTACACTGACTTTGCAACATCAGCTTGTGTTTTGGCTGCTGAATGT | 9022 |
| gb:MT019532 | Organism:Severe | TCAAACCTTATAGAGTACACTGACTTTGCAACATCAGCTTGTGTTTTGGCTGCTGAATGT | 9022 |

\*\*\*\*\*

|             |                 |                                                             |      |
|-------------|-----------------|-------------------------------------------------------------|------|
| gb:MT020781 | Organism:Severe | ACAATTTTAAAGATGCTTCTGGTAAGCCAGTACCATATTGTTATGATACCAATGTACTA | 9070 |
| gb:MT007544 | Organism:Severe | ACAATTTTAAAGATGCTTCTGGTAAGCCAGTACCATATTGTTATGATACCAATGTACTA | 9082 |
| gb:MN994467 | Organism:Severe | ACAATTTTAAAGATGCTTCTGGTAAGCCAGTACCATATTGTTATGATACCAATGTACTA | 9082 |
| gb:MT044257 | Organism:Severe | ACAATTTTAAAGATGCTTCTGGTAAGCCAGTACCATATTGTTATGATACCAATGTACTA | 9082 |
| gb:MT106054 | Organism:Severe | ACAATTTTAAAGATGCTTCTGGTAAGCCAGTACCATATTGTTATGATACCAATGTACTA | 9082 |

|             |                 |                                                          |      |
|-------------|-----------------|----------------------------------------------------------|------|
| gb:MT049951 | Organism:Severe | ACAATTTTAAAGATGCTTCTGGTAAGCCAGTACCATATTGTTATGATACCAATGTA | 9082 |
| gb:MN975262 | Organism:Severe | ACAATTTTAAAGATGCTTCTGGTAAGCCAGTACCATATTGTTATGATACCAATGTA | 9082 |
| gb:MT106052 | Organism:Severe | ACAATTTTAAAGATGCTTCTGGTAAGCCAGTACCATATTGTTATGATACCAATGTA | 9082 |
| gb:LC522975 | Organism:Severe | ACAATTTTAAAGATGCTTCTGGTAAGCCAGTACCATATTGTTATGATACCAATGTA | 9079 |
| gb:LC522973 | Organism:Severe | ACAATTTTAAAGATGCTTCTGGTAAGCCAGTACCATATTGTTATGATACCAATGTA | 9079 |
| gb:LC522974 | Organism:Severe | ACAATTTTAAAGATGCTTCTGGTAAGCCAGTACCATATTGTTATGATACCAATGTA | 9079 |
| gb:MN985325 | Organism:Severe | ACAATTTTAAAGATGCTTCTGGTAAGCCAGTACCATATTGTTATGATACCAATGTA | 9082 |
| gb:MT020881 | Organism:Severe | ACAATTTTAAAGATGCTTCTGGTAAGCCAGTACCATATTGTTATGATACCAATGTA | 9082 |
| gb:MT020880 | Organism:Severe | ACAATTTTAAAGATGCTTCTGGTAAGCCAGTACCATATTGTTATGATACCAATGTA | 9082 |
| gb:MT066175 | Organism:Severe | ACAATTTTAAAGATGCTTCTGGTAAGCCAGTACCATATTGTTATGATACCAATGTA | 9082 |
| gb:MN997409 | Organism:Severe | ACAATTTTAAAGATGCTTCTGGTAAGCCAGTACCATATTGTTATGATACCAATGTA | 9082 |
| gb:MN938384 | Organism:Severe | ACAATTTTAAAGATGCTTCTGGTAAGCCAGTACCATATTGTTATGATACCAATGTA | 9050 |
| gb:MT044258 | Organism:Severe | ACAATTTTAAAGATGCTTCTGGTAAGCCAGTACCATATTGTTATGATACCAATGTA | 9058 |
| gb:MT039890 | Organism:Severe | ACAATTTTAAAGATGCTTCTGGTAAGCCAGTACCATATTGTTATGATACCAATGTA | 9082 |
| gb:MN988713 | Organism:Severe | ACAATTTTAAAGATGCTTCTGGTAAGCCAGTACCATATTGTTATGATACCAATGTA | 9082 |
| gb:LC521925 | Organism:Severe | ACAATTTTAAAGATGCTTCTGGTAAGCCAGTACCATATTGTTATGATACCAATGTA | 9055 |
| gb:MT093571 | Organism:Severe | ACAATTTTAAAGATGCTTCTGGTAAGCCAGTACCATATTGTTATGATACCAATGTA | 9082 |
| gb:MT039887 | Organism:Severe | ACAATTTTAAAGATGCTTCTGGTAAGCCAGTACCATATTGTTATGATACCAATGTA | 9082 |
| gb:MT019530 | Organism:Severe | ACAATTTTAAAGATGCTTCTGGTAAGCCAGTACCATATTGTTATGATACCAATGTA | 9082 |
| gb:MT039888 | Organism:Severe | ACAATTTTAAAGATGCTTCTGGTAAGCCAGTACCATATTGTTATGATACCAATGTA | 9082 |
| gb:LC522972 | Organism:Severe | ACAATTTTAAAGATGCTTCTGGTAAGCCAGTACCATATTGTTATGATACCAATGTA | 9079 |
| gb:MT027063 | Organism:Severe | ACAATTTTAAAGATGCTTCTGGTAAGCCAGTACCATATTGTTATGATACCAATGTA | 9082 |
| gb:MT027062 | Organism:Severe | ACAATTTTAAAGATGCTTCTGGTAAGCCAGTACCATATTGTTATGATACCAATGTA | 9082 |
| gb:MT019529 | Organism:Severe | ACAATTTTAAAGATGCTTCTGGTAAGCCAGTACCATATTGTTATGATACCAATGTA | 9082 |
| gb:MN996529 | Organism:Severe | ACAATTTTAAAGATGCTTCTGGTAAGCCAGTACCATATTGTTATGATACCAATGTA | 9070 |
| gb:MN996531 | Organism:Severe | ACAATTTTAAAGATGCTTCTGGTAAGCCAGTACCATATTGTTATGATACCAATGTA | 9069 |
| gb:MT066176 | Organism:Severe | ACAATTTTAAAGATGCTTCTGGTAAGCCAGTACCATATTGTTATGATACCAATGTA | 9082 |
| gb:MT027064 | Organism:Severe | ACAATTTTAAAGATGCTTCTGGTAAGCCAGTACCATATTGTTATGATACCAATGTA | 9082 |
| gb:MN994468 | Organism:Severe | ACAATTTTAAAGATGCTTCTGGTAAGCCAGTACCATATTGTTATGATACCAATGTA | 9082 |
| gb:MT072688 | Organism:Severe | ACAATTTTAAAGATGCTTCTGGTAAGCCAGTACCATATTGTTATGATACCAATGTA | 9067 |
| gb:MN996527 | Organism:Severe | ACAATTTTAAAGATGCTTCTGGTAAGCCAGTACCATATTGTTATGATACCAATGTA | 9049 |
| gb:MT093631 | Organism:Severe | ACAATTTTAAAGATGCTTCTGGTAAGCCAGTACCATATTGTTATGATACCAATGTA | 9120 |
| gb:MT106053 | Organism:Severe | ACAATTTTAAAGATGCTTCTGGTAAGCCAGTACCATATTGTTATGATACCAATGTA | 9082 |
| gb:MT019533 | Organism:Severe | ACAATTTTAAAGATGCTTCTGGTAAGCCAGTACCATATTGTTATGATACCAATGTA | 9082 |
| gb:MT019531 | Organism:Severe | ACAATTTTAAAGATGCTTCTGGTAAGCCAGTACCATATTGTTATGATACCAATGTA | 9082 |
| gb:MN996528 | Organism:Severe | ACAATTTTAAAGATGCTTCTGGTAAGCCAGTACCATATTGTTATGATACCAATGTA | 9082 |
| gb:MN996530 | Organism:Severe | ACAATTTTAAAGATGCTTCTGGTAAGCCAGTACCATATTGTTATGATACCAATGTA | 9068 |
| gb:MN908947 | Organism:Severe | ACAATTTTAAAGATGCTTCTGGTAAGCCAGTACCATATTGTTATGATACCAATGTA | 9082 |
| gb:MT019532 | Organism:Severe | ACAATTTTAAAGATGCTTCTGGTAAGCCAGTACCATATTGTTATGATACCAATGTA | 9082 |

\*\*\*\*\*

|             |                 |                                                              |      |
|-------------|-----------------|--------------------------------------------------------------|------|
| gb:MT020781 | Organism:Severe | GAAGGTTCTGTTGCTTATGAAAGTTTACGCCCTGACACACGTTATGTGCTCATGGATGGC | 9130 |
| gb:MT007544 | Organism:Severe | GAAGGTTCTGTTGCTTATGAAAGTTTACGCCCTGACACACGTTATGTGCTCATGGATGGC | 9142 |
| gb:MN994467 | Organism:Severe | GAAGGTTCTGTTGCTTATGAAAGTTTACGCCCTGACACACGTTATGTGCTCATGGATGGC | 9142 |
| gb:MT044257 | Organism:Severe | GAAGGTTCTGTTGCTTATGAAAGTTTACGCCCTGACACACGTTATGTGCTCATGGATGGC | 9142 |
| gb:MT106054 | Organism:Severe | GAAGGTTCTGTTGCTTATGAAAGTTTACGCCCTGACACACGTTATGTGCTCATGGATGGC | 9142 |
| gb:MT049951 | Organism:Severe | GAAGGTTCTGTTGCTTATGAAAGTTTACGCCCTGACACACGTTATGTGCTCATGGATGGC | 9142 |
| gb:MN975262 | Organism:Severe | GAAGGTTCTGTTGCTTATGAAAGTTTACGCCCTGACACACGTTATGTGCTCATGGATGGC | 9142 |
| gb:MT106052 | Organism:Severe | GAAGGTTCTGTTGCTTATGAAAGTTTACGCCCTGACACACGTTATGTGCTCATGGATGGC | 9142 |
| gb:LC522975 | Organism:Severe | GAAGGTTCTGTTGCTTATGAAAGTTTACGCCCTGACACACGTTATGTGCTCATGGATGGC | 9139 |
| gb:LC522973 | Organism:Severe | GAAGGTTCTGTTGCTTATGAAAGTTTACGCCCTGACACACGTTATGTGCTCATGGATGGC | 9139 |
| gb:LC522974 | Organism:Severe | GAAGGTTCTGTTGCTTATGAAAGTTTACGCCCTGACACACGTTATGTGCTCATGGATGGC | 9139 |
| gb:MN985325 | Organism:Severe | GAAGGTTCTGTTGCTTATGAAAGTTTACGCCCTGACACACGTTATGTGCTCATGGATGGC | 9142 |
| gb:MT020881 | Organism:Severe | GAAGGTTCTGTTGCTTATGAAAGTTTACGCCCTGACACACGTTATGTGCTCATGGATGGC | 9142 |
| gb:MT020880 | Organism:Severe | GAAGGTTCTGTTGCTTATGAAAGTTTACGCCCTGACACACGTTATGTGCTCATGGATGGC | 9142 |
| gb:MT066175 | Organism:Severe | GAAGGTTCTGTTGCTTATGAAAGTTTACGCCCTGACACACGTTATGTGCTCATGGATGGC | 9142 |
| gb:MN997409 | Organism:Severe | GAAGGTTCTGTTGCTTATGAAAGTTTACGCCCTGACACACGTTATGTGCTCATGGATGGC | 9142 |
| gb:MN938384 | Organism:Severe | GAAGGTTCTGTTGCTTATGAAAGTTTACGCCCTGACACACGTTATGTGCTCATGGATGGC | 9110 |
| gb:MT044258 | Organism:Severe | GAAGGTTCTGTTGCTTATGAAAGTTTACGCCCTGACACACGTTATGTGCTCATGGATGGC | 9118 |
| gb:MT039890 | Organism:Severe | GAAGGTTCTGTTGCTTATGAAAGTTTACGCCCTGACACACGTTATGTGCTCATGGATGGC | 9142 |
| gb:MN988713 | Organism:Severe | GAAGGTTCTGTTGCTTATGAAAGTTTACGCCCTGACACACGTTATGTGCTCATGGATGGC | 9142 |
| gb:LC521925 | Organism:Severe | GAAGGTTCTGTTGCTTATGAAAGTTTACGCCCTGACACACGTTATGTGCTCATGGATGGC | 9115 |
| gb:MT093571 | Organism:Severe | GAAGGTTCTGTTGCTTATGAAAGTTTACGCCCTGACACACGTTATGTGCTCATGGATGGC | 9142 |
| gb:MT039887 | Organism:Severe | GAAGGTTCTGTTGCTTATGAAAGTTTACGCCCTGACACACGTTATGTGCTCATGGATGGC | 9142 |
| gb:MT019530 | Organism:Severe | GAAGGTTCTGTTGCTTATGAAAGTTTACGCCCTGACACACGTTATGTGCTCATGGATGGC | 9142 |

|             |                 |                                                              |      |
|-------------|-----------------|--------------------------------------------------------------|------|
| gb:MT039888 | Organism:Severe | GAAGGTTCTGTTGCTTATGAAAGTTTACGCCCTGACACACGTTATGTGCTCATGGATGGC | 9142 |
| gb:LC522972 | Organism:Severe | GAAGGTTCTGTTGCTTATGAAAGTTTACGCCCTGACACACGTTATGTGCTCATGGATGGC | 9139 |
| gb:MT027063 | Organism:Severe | GAAGGTTCTGTTGCTTATGAAAGTTTACGCCCTGACACACGTTATGTGCTCATGGATGGC | 9142 |
| gb:MT027062 | Organism:Severe | GAAGGTTCTGTTGCTTATGAAAGTTTACGCCCTGACACACGTTATGTGCTCATGGATGGC | 9142 |
| gb:MT019529 | Organism:Severe | GAAGGTTCTGTTGCTTATGAAAGTTTACGCCCTGACACACGTTATGTGCTCATGGATGGC | 9142 |
| gb:MN996529 | Organism:Severe | GAAGGTTCTGTTGCTTATGAAAGTTTACGCCCTGACACACGTTATGTGCTCATGGATGGC | 9130 |
| gb:MN996531 | Organism:Severe | GAAGGTTCTGTTGCTTATGAAAGTTTACGCCCTGACACACGTTATGTGCTCATGGATGGC | 9129 |
| gb:MT066176 | Organism:Severe | GAAGGTTCTGTTGCTTATGAAAGTTTACGCCCTGACACACGTTATGTGCTCATGGATGGC | 9142 |
| gb:MT027064 | Organism:Severe | GAAGGTTCTGTTGCTTATGAAAGTTTACGCCCTGACACACGTTATGTGCTCATGGATGGC | 9142 |
| gb:MN994468 | Organism:Severe | GAAGGTTCTGTTGCTTATGAAAGTTTACGCCCTGACACACGTTATGTGCTCATGGATGGC | 9142 |
| gb:MT072688 | Organism:Severe | GAAGGTTCTGTTGCTTATGAAAGTTTACGCCCTGACACACGTTATGTGCTCATGGATGGC | 9127 |
| gb:MN996527 | Organism:Severe | GAAGGTTCTGTTGCTTATGAAAGTTTACGCCCTGACACACGTTATGTGCTCATGGATGGC | 9109 |
| gb:MT093631 | Organism:Severe | GAAGGTTCTGTTGCTTATGAAAGTTTACGCCCTGACACACGTTATGTGCTCATGGATGGC | 9180 |
| gb:MT106053 | Organism:Severe | GAAGGTTCTGTTGCTTATGAAAGTTTACGCCCTGACACACGTTATGTGCTCATGGATGGC | 9142 |
| gb:MT019533 | Organism:Severe | GAAGGTTCTGTTGCTTATGAAAGTTTACGCCCTGACACACGTTATGTGCTCATGGATGGC | 9142 |
| gb:MT019531 | Organism:Severe | GAAGGTTCTGTTGCTTATGAAAGTTTACGCCCTGACACACGTTATGTGCTCATGGATGGC | 9142 |
| gb:MN996528 | Organism:Severe | GAAGGTTCTGTTGCTTATGAAAGTTTACGCCCTGACACACGTTATGTGCTCATGGATGGC | 9142 |
| gb:MN996530 | Organism:Severe | GAAGGTTCTGTTGCTTATGAAAGTTTACGCCCTGACACACGTTATGTGCTCATGGATGGC | 9128 |
| gb:MN908947 | Organism:Severe | GAAGGTTCTGTTGCTTATGAAAGTTTACGCCCTGACACACGTTATGTGCTCATGGATGGC | 9142 |
| gb:MT019532 | Organism:Severe | GAAGGTTCTGTTGCTTATGAAAGTTTACGCCCTGACACACGTTATGTGCTCATGGATGGC | 9142 |

\*\*\*\*\*

|             |                 |                                                              |      |
|-------------|-----------------|--------------------------------------------------------------|------|
| gb:MT020781 | Organism:Severe | TCTATTATTCAATTTCTAACACCTACCTTGAAGGTTCTGTTAGAGTGGTAACAACCTTTT | 9190 |
| gb:MT007544 | Organism:Severe | TCTATTATTCAATTTCTAACACCTACCTTGAAGGTTCTGTTAGAGTGGTAACAACCTTTT | 9202 |
| gb:MN994467 | Organism:Severe | TCTATTATTCAATTTCTAACACCTACCTTGAAGGTTCTGTTAGAGTGGTAACAACCTTTT | 9202 |
| gb:MT044257 | Organism:Severe | TCTATTATTCAATTTCTAACACCTACCTTGAAGGTTCTGTTAGAGTGGTAACAACCTTTT | 9202 |
| gb:MT106054 | Organism:Severe | TCTATTATTCAATTTCTAACACCTACCTTGAAGGTTCTGTTAGAGTGGTAACAACCTTTT | 9202 |
| gb:MT049951 | Organism:Severe | TCTATTATTCAATTTCTAACACCTACCTTGAAGGTTCTGTTAGAGTGGTAACAACCTTTT | 9202 |
| gb:MN975262 | Organism:Severe | TCTATTATTCAATTTCTAACACCTACCTTGAAGGTTCTGTTAGAGTGGTAACAACCTTTT | 9202 |
| gb:MT106052 | Organism:Severe | TCTATTATTCAATTTCTAACACCTACCTTGAAGGTTCTGTTAGAGTGGTAACAACCTTTT | 9202 |
| gb:LC522975 | Organism:Severe | TCTATTATTCAATTTCTAACACCTACCTTGAAGGTTCTGTTAGAGTGGTAACAACCTTTT | 9199 |
| gb:LC522973 | Organism:Severe | TCTATTATTCAATTTCTAACACCTACCTTGAAGGTTCTGTTAGAGTGGTAACAACCTTTT | 9199 |
| gb:LC522974 | Organism:Severe | TCTATTATTCAATTTCTAACACCTACCTTGAAGGTTCTGTTAGAGTGGTAACAACCTTTT | 9199 |
| gb:MN985325 | Organism:Severe | TCTATTATTCAATTTCTAACACCTACCTTGAAGGTTCTGTTAGAGTGGTAACAACCTTTT | 9202 |
| gb:MT020881 | Organism:Severe | TCTATTATTCAATTTCTAACACCTACCTTGAAGGTTCTGTTAGAGTGGTAACAACCTTTT | 9202 |
| gb:MT020880 | Organism:Severe | TCTATTATTCAATTTCTAACACCTACCTTGAAGGTTCTGTTAGAGTGGTAACAACCTTTT | 9202 |
| gb:MT066175 | Organism:Severe | TCTATTATTCAATTTCTAACACCTACCTTGAAGGTTCTGTTAGAGTGGTAACAACCTTTT | 9202 |
| gb:MN997409 | Organism:Severe | TCTATTATTCAATTTCTAACACCTACCTTGAAGGTTCTGTTAGAGTGGTAACAACCTTTT | 9202 |
| gb:MN938384 | Organism:Severe | TCTATTATTCAATTTCTAACACCTACCTTGAAGGTTCTGTTAGAGTGGTAACAACCTTTT | 9170 |
| gb:MT044258 | Organism:Severe | TCTATTATTCAATTTCTAACACCTACCTTGAAGGTTCTGTTAGAGTGGTAACAACCTTTT | 9178 |
| gb:MT039890 | Organism:Severe | TCTATTATTCAATTTCTAACACCTACCTTGAAGGTTCTGTTAGAGTGGTAACAACCTTTT | 9202 |
| gb:MN988713 | Organism:Severe | TCTATTATTCAATTTCTAACACCTACCTTGAAGGTTCTGTTAGAGTGGTAACAACCTTTT | 9202 |
| gb:LC521925 | Organism:Severe | TCTATTATTCAATTTCTAACACCTACCTTGAAGGTTCTGTTAGAGTGGTAACAACCTTTT | 9175 |
| gb:MT093571 | Organism:Severe | TCTATTATTCAATTTCTAACACCTACCTTGAAGGTTCTGTTAGAGTGGTAACAACCTTTT | 9202 |
| gb:MT039887 | Organism:Severe | TCTATTATTCAATTTCTAACACCTACCTTGAAGGTTCTGTTAGAGTGGTAACAACCTTTT | 9202 |
| gb:MT019530 | Organism:Severe | TCTATTATTCAATTTCTAACACCTACCTTGAAGGTTCTGTTAGAGTGGTAACAACCTTTT | 9202 |
| gb:MT039888 | Organism:Severe | TCTATTATTCAATTTCTAACACCTACCTTGAAGGTTCTGTTAGAGTGGTAACAACCTTTT | 9202 |
| gb:LC522972 | Organism:Severe | TCTATTATTCAATTTCTAACACCTACCTTGAAGGTTCTGTTAGAGTGGTAACAACCTTTT | 9199 |
| gb:MT027063 | Organism:Severe | TCTATTATTCAATTTCTAACACCTACCTTGAAGGTTCTGTTAGAGTGGTAACAACCTTTT | 9202 |
| gb:MT027062 | Organism:Severe | TCTATTATTCAATTTCTAACACCTACCTTGAAGGTTCTGTTAGAGTGGTAACAACCTTTT | 9202 |
| gb:MT019529 | Organism:Severe | TCTATTATTCAATTTCTAACACCTACCTTGAAGGTTCTGTTAGAGTGGTAACAACCTTTT | 9202 |
| gb:MN996529 | Organism:Severe | TCTATTATTCAATTTCTAACACCTACCTTGAAGGTTCTGTTAGAGTGGTAACAACCTTTT | 9190 |
| gb:MN996531 | Organism:Severe | TCTATTATTCAATTTCTAACACCTACCTTGAAGGTTCTGTTAGAGTGGTAACAACCTTTT | 9189 |
| gb:MT066176 | Organism:Severe | TCTATTATTCAATTTCTAACACCTACCTTGAAGGTTCTGTTAGAGTGGTAACAACCTTTT | 9202 |
| gb:MT027064 | Organism:Severe | TCTATTATTCAATTTCTAACACCTACCTTGAAGGTTCTGTTAGAGTGGTAACAACCTTTT | 9202 |
| gb:MN994468 | Organism:Severe | TCTATTATTCAATTTCTAACACCTACCTTGAAGGTTCTGTTAGAGTGGTAACAACCTTTT | 9202 |
| gb:MT072688 | Organism:Severe | TCTATTATTCAATTTCTAACACCTACCTTGAAGGTTCTGTTAGAGTGGTAACAACCTTTT | 9187 |
| gb:MN996527 | Organism:Severe | TCTATTATTCAATTTCTAACACCTACCTTGAAGGTTCTGTTAGAGTGGTAACAACCTTTT | 9169 |
| gb:MT093631 | Organism:Severe | TCTATTATTCAATTTCTAACACCTACCTTGAAGGTTCTGTTAGAGTGGTAACAACCTTTT | 9240 |
| gb:MT106053 | Organism:Severe | TCTATTATTCAATTTCTAACACCTACCTTGAAGGTTCTGTTAGAGTGGTAACAACCTTTT | 9202 |
| gb:MT019533 | Organism:Severe | TCTATTATTCAATTTCTAACACCTACCTTGAAGGTTCTGTTAGAGTGGTAACAACCTTTT | 9202 |
| gb:MT019531 | Organism:Severe | TCTATTATTCAATTTCTAACACCTACCTTGAAGGTTCTGTTAGAGTGGTAACAACCTTTT | 9202 |
| gb:MN996528 | Organism:Severe | TCTATTATTCAATTTCTAACACCTACCTTGAAGGTTCTGTTAGAGTGGTAACAACCTTTT | 9202 |
| gb:MN996530 | Organism:Severe | TCTATTATTCAATTTCTAACACCTACCTTGAAGGTTCTGTTAGAGTGGTAACAACCTTTT | 9188 |
| gb:MN908947 | Organism:Severe | TCTATTATTCAATTTCTAACACCTACCTTGAAGGTTCTGTTAGAGTGGTAACAACCTTTT | 9202 |

|             |                  |                                                                       |      |
|-------------|------------------|-----------------------------------------------------------------------|------|
| gb:MT019532 | Organism: Severe | TCTATTATCAATTCCTAACACCTACCTTGAAGTTCTGTTAGAGTGGTAACAACCTTTT<br>*****   | 9202 |
| gb:MT020781 | Organism: Severe | GATTCTGAGTACTGTAGGCACGGCCTTGTGAAAGATCAGAAGCTGGTGTGTTGTGTATCT          | 9250 |
| gb:MT007544 | Organism: Severe | GATTCTGAGTACTGTAGGCACGGCCTTGTGAAAGATCAGAAGCTGGTGTGTTGTGTATCT          | 9262 |
| gb:MN994467 | Organism: Severe | GATTCTGAGTACTGTAGGCACGGCCTTGTGAAAGATCAGAAGCTGGTGTGTTGTGTATCT          | 9262 |
| gb:MT044257 | Organism: Severe | GATTCTGAGTACTGTAGGCACGGCCTTGTGAAAGATCAGAAGCTGGTGTGTTGTGTATCT          | 9262 |
| gb:MT106054 | Organism: Severe | GATTCTGAGTACTGTAGGCACGGCCTTGTGAAAGATCAGAAGCTGGTGTGTTGTGTATCT          | 9262 |
| gb:MT049951 | Organism: Severe | GATTCTGAGTACTGTAGGCACGGCCTTGTGAAAGATCAGAAGCTGGTGTGTTGTGTATCT          | 9262 |
| gb:MN975262 | Organism: Severe | GATTCTGAGTACTGTAGGCACGGCCTTGTGAAAGATCAGAAGCTGGTGTGTTGTGTATCT          | 9262 |
| gb:MT106052 | Organism: Severe | GATTCTGAGTACTGTAGGCACGGCCTTGTGAAAGATCAGAAGCTGGTGTGTTGTGTATCT          | 9262 |
| gb:LC522975 | Organism: Severe | GATTCTGAGTACTGTAGGCACGGCCTTGTGAAAGATCAGAAGCTGGTGTGTTGTGTATCT          | 9259 |
| gb:LC522973 | Organism: Severe | GATTCTGAGTACTGTAGGCACGGCCTTGTGAAAGATCAGAAGCTGGTGTGTTGTGTATCT          | 9259 |
| gb:LC522974 | Organism: Severe | GATTCTGAGTACTGTAGGCACGGCCTTGTGAAAGATCAGAAGCTGGTGTGTTGTGTATCT          | 9259 |
| gb:MN985325 | Organism: Severe | GATTCTGAGTACTGTAGGCACGGCCTTGTGAAAGATCAGAAGCTGGTGTGTTGTGTATCT          | 9262 |
| gb:MT020881 | Organism: Severe | GATTCTGAGTACTGTAGGCACGGCCTTGTGAAAGATCAGAAGCTGGTGTGTTGTGTATCT          | 9262 |
| gb:MT020880 | Organism: Severe | GATTCTGAGTACTGTAGGCACGGCCTTGTGAAAGATCAGAAGCTGGTGTGTTGTGTATCT          | 9262 |
| gb:MT066175 | Organism: Severe | GATTCTGAGTACTGTAGGCACGGCCTTGTGAAAGATCAGAAGCTGGTGTGTTGTGTATCT          | 9262 |
| gb:MN997409 | Organism: Severe | GATTCTGAGTACTGTAGGCACGGCCTTGTGAAAGATCAGAAGCTGGTGTGTTGTGTATCT          | 9262 |
| gb:MN938384 | Organism: Severe | GATTCTGAGTACTGTAGGCACGGCCTTGTGAAAGATCAGAAGCTGGTGTGTTGTGTATCT          | 9230 |
| gb:MT044258 | Organism: Severe | GATTCTGAGTACTGTAGGCACGGCCTTGTGAAAGATCAGAAGCTGGTGTGTTGTGTATCT          | 9238 |
| gb:MT039890 | Organism: Severe | GATTCTGAGTACTGTAGGCACGGCCTTGTGAAAGATCAGAAGCTGGTGTGTTGTGTATCT          | 9262 |
| gb:MN988713 | Organism: Severe | GATTCTGAGTACTGTAGGCACGGCCTTGTGAAAGATCAGAAGCTGGTGTGTTGTGTATCT          | 9262 |
| gb:LC521925 | Organism: Severe | GATTCTGAGTACTGTAGGCACGGCCTTGTGAAAGATCAGAAGCTGGTGTGTTGTGTATCT          | 9235 |
| gb:MT093571 | Organism: Severe | GATTCTGAGTACTGTAGGCACGGCCTTGTGAAAGATCAGAAGCTGGTGTGTTGTGTATCT          | 9262 |
| gb:MT039887 | Organism: Severe | GATTCTGAGTACTGTAGGCACGGCCTTGTGAAAGATCAGAAGCTGGTGTGTTGTGTATCT          | 9262 |
| gb:MT019530 | Organism: Severe | GATTCTGAGTACTGTAGGCACGGCCTTGTGAAAGATCAGAAGCTGGTGTGTTGTGTATCT          | 9262 |
| gb:MT039888 | Organism: Severe | GATTCTGAGTACTGTAGGCACGGCCTTGTGAAAGATCAGAAGCTGGTGTGTTGTGTATCT          | 9262 |
| gb:LC522972 | Organism: Severe | GATTCTGAGTACTGTAGGCACGGCCTTGTGAAAGATCAGAAGCTGGTGTGTTGTGTATCT          | 9259 |
| gb:MT027063 | Organism: Severe | GATTCTGAGTACTGTAGGCACGGCCTTGTGAAAGATCAGAAGCTGGTGTGTTGTGTATCT          | 9262 |
| gb:MT027062 | Organism: Severe | GATTCTGAGTACTGTAGGCACGGCCTTGTGAAAGATCAGAAGCTGGTGTGTTGTGTATCT          | 9262 |
| gb:MT019529 | Organism: Severe | GATTCTGAGTACTGTAGGCACGGCCTTGTGAAAGATCAGAAGCTGGTGTGTTGTGTATCT          | 9262 |
| gb:MN996529 | Organism: Severe | GATTCTGAGTACTGTAGGCACGGCCTTGTGAAAGATCAGAAGCTGGTGTGTTGTGTATCT          | 9250 |
| gb:MN996531 | Organism: Severe | GATTCTGAGTACTGTAGGCACGGCCTTGTGAAAGATCAGAAGCTGGTGTGTTGTGTATCT          | 9249 |
| gb:MT066176 | Organism: Severe | GATTCTGAGTACTGTAGGCACGGCCTTGTGAAAGATCAGAAGCTGGTGTGTTGTGTATCT          | 9262 |
| gb:MT027064 | Organism: Severe | GATTCTGAGTACTGTAGGCACGGCCTTGTGAAAGATCAGAAGCTGGTGTGTTGTGTATCT          | 9262 |
| gb:MN994468 | Organism: Severe | GATTCTGAGTACTGTAGGCACGGCCTTGTGAAAGATCAGAAGCTGGTGTGTTGTGTATCT          | 9262 |
| gb:MT072688 | Organism: Severe | GATTCTGAGTACTGTAGGCACGGCCTTGTGAAAGATCAGAAGCTGGTGTGTTGTGTATCT          | 9247 |
| gb:MN996527 | Organism: Severe | GATTCTGAGTACTGTAGGCACGGCCTTGTGAAAGATCAGAAGCTGGTGTGTTGTGTATCT          | 9229 |
| gb:MT093631 | Organism: Severe | GATTCTGAGTACTGTAGGCACGGCCTTGTGAAAGATCAGAAGCTGGTGTGTTGTGTATCT          | 9300 |
| gb:MT106053 | Organism: Severe | GATTCTGAGTACTGTAGGCACGGCCTTGTGAAAGATCAGAAGCTGGTGTGTTGTGTATCT          | 9262 |
| gb:MT019533 | Organism: Severe | GATTCTGAGTACTGTAGGCACGGCCTTGTGAAAGATCAGAAGCTGGTGTGTTGTGTATCT          | 9262 |
| gb:MT019531 | Organism: Severe | GATTCTGAGTACTGTAGGCACGGCCTTGTGAAAGATCAGAAGCTGGTGTGTTGTGTATCT          | 9262 |
| gb:MN996528 | Organism: Severe | GATTCTGAGTACTGTAGGCACGGCCTTGTGAAAGATCAGAAGCTGGTGTGTTGTGTATCT          | 9262 |
| gb:MN996530 | Organism: Severe | GATTCTGAGTACTGTAGGCACGGCCTTGTGAAAGATCAGAAGCTGGTGTGTTGTGTATCT          | 9248 |
| gb:MN908947 | Organism: Severe | GATTCTGAGTACTGTAGGCACGGCCTTGTGAAAGATCAGAAGCTGGTGTGTTGTGTATCT          | 9262 |
| gb:MT019532 | Organism: Severe | GATTCTGAGTACTGTAGGCACGGCCTTGTGAAAGATCAGAAGCTGGTGTGTTGTGTATCT<br>***** | 9262 |

|             |                  |                                                              |      |
|-------------|------------------|--------------------------------------------------------------|------|
| gb:MT020781 | Organism: Severe | ACTAGTGGTAGATGGGTACTTAACAATGATTATTACAGATCTTTACCAGGAGTTTTCTGT | 9310 |
| gb:MT007544 | Organism: Severe | ACTAGTGGTAGATGGGTACTTAACAATGATTATTACAGATCTTTACCAGGAGTTTTCTGT | 9322 |
| gb:MN994467 | Organism: Severe | ACTAGTGGTAGATGGGTACTTAACAATGATTATTACAGATCTTTACCAGGAGTTTTCTGT | 9322 |
| gb:MT044257 | Organism: Severe | ACTAGTGGTAGATGGGTACTTAACAATGATTATTACAGATCTTTACCAGGAGTTTTCTGT | 9322 |
| gb:MT106054 | Organism: Severe | ACTAGTGGTAGATGGGTACTTAACAATGATTATTACAGATCTTTACCAGGAGTTTTCTGT | 9322 |
| gb:MT049951 | Organism: Severe | ACTAGTGGTAGATGGGTACTTAACAATGATTATTACAGATCTTTACCAGGAGTTTTCTGT | 9322 |
| gb:MN975262 | Organism: Severe | ACTAGTGGTAGATGGGTACTTAACAATGATTATTACAGATCTTTACCAGGAGTTTTCTGT | 9322 |
| gb:MT106052 | Organism: Severe | ACTAGTGGTAGATGGGTACTTAACAATGATTATTACAGATCTTTACCAGGAGTTTTCTGT | 9322 |
| gb:LC522975 | Organism: Severe | ACTAGTGGTAGATGGGTACTTAACAATGATTATTACAGATCTTTACCAGGAGTTTTCTGT | 9319 |
| gb:LC522973 | Organism: Severe | ACTAGTGGTAGATGGGTACTTAACAATGATTATTACAGATCTTTACCAGGAGTTTTCTGT | 9319 |
| gb:LC522974 | Organism: Severe | ACTAGTGGTAGATGGGTACTTAACAATGATTATTACAGATCTTTACCAGGAGTTTTCTGT | 9319 |
| gb:MN985325 | Organism: Severe | ACTAGTGGTAGATGGGTACTTAACAATGATTATTACAGATCTTTACCAGGAGTTTTCTGT | 9322 |
| gb:MT020881 | Organism: Severe | ACTAGTGGTAGATGGGTACTTAACAATGATTATTACAGATCTTTACCAGGAGTTTTCTGT | 9322 |
| gb:MT020880 | Organism: Severe | ACTAGTGGTAGATGGGTACTTAACAATGATTATTACAGATCTTTACCAGGAGTTTTCTGT | 9322 |
| gb:MT066175 | Organism: Severe | ACTAGTGGTAGATGGGTACTTAACAATGATTATTACAGATCTTTACCAGGAGTTTTCTGT | 9322 |
| gb:MN997409 | Organism: Severe | ACTAGTGGTAGATGGGTACTTAACAATGATTATTACAGATCTTTACCAGGAGTTTTCTGT | 9322 |

|             |                 |                                                             |      |
|-------------|-----------------|-------------------------------------------------------------|------|
| gb:MN938384 | Organism:Severe | ACTAGTGGTAGATGGGTACTTAACAATGATTATTACAGATCTTTACCAGGAGTTTCTGT | 9290 |
| gb:MT044258 | Organism:Severe | ACTAGTGGTAGATGGGTACTTAACAATGATTATTACAGATCTTTACCAGGAGTTTCTGT | 9298 |
| gb:MT039890 | Organism:Severe | ACTAGTGGTAGATGGGTACTTAACAATGATTATTACAGATCTTTACCAGGAGTTTCTGT | 9322 |
| gb:MN988713 | Organism:Severe | ACTAGTGGTAGATGGGTACTTAACAATGATTATTACAGATCTTTACCAGGAGTTTCTGT | 9322 |
| gb:LC521925 | Organism:Severe | ACTAGTGGTAGATGGGTACTTAACAATGATTATTACAGATCTTTACCAGGAGTTTCTGT | 9295 |
| gb:MT093571 | Organism:Severe | ACTAGTGGTAGATGGGTACTTAACAATGATTATTACAGATCTTTACCAGGAGTTTCTGT | 9322 |
| gb:MT039887 | Organism:Severe | ACTAGTGGTAGATGGGTACTTAACAATGATTATTACAGATCTTTACCAGGAGTTTCTGT | 9322 |
| gb:MT019530 | Organism:Severe | ACTAGTGGTAGATGGGTACTTAACAATGATTATTACAGATCTTTACCAGGAGTTTCTGT | 9322 |
| gb:MT039888 | Organism:Severe | ACTAGTGGTAGATGGGTACTTAACAATGATTATTACAGATCTTTACCAGGAGTTTCTGT | 9322 |
| gb:LC522972 | Organism:Severe | ACTAGTGGTAGATGGGTACTTAACAATGATTATTACAGATCTTTACCAGGAGTTTCTGT | 9319 |
| gb:MT027063 | Organism:Severe | ACTAGTGGTAGATGGGTACTTAACAATGATTATTACAGATCTTTACCAGGAGTTTCTGT | 9322 |
| gb:MT027062 | Organism:Severe | ACTAGTGGTAGATGGGTACTTAACAATGATTATTACAGATCTTTACCAGGAGTTTCTGT | 9322 |
| gb:MT019529 | Organism:Severe | ACTAGTGGTAGATGGGTACTTAACAATGATTATTACAGATCTTTACCAGGAGTTTCTGT | 9322 |
| gb:MN996529 | Organism:Severe | ACTAGTGGTAGATGGGTACTTAACAATGATTATTACAGATCTTTACCAGGAGTTTCTGT | 9310 |
| gb:MN996531 | Organism:Severe | ACTAGTGGTAGATGGGTACTTAACAATGATTATTACAGATCTTTACCAGGAGTTTCTGT | 9309 |
| gb:MT066176 | Organism:Severe | ACTAGTGGTAGATGGGTACTTAACAATGATTATTACAGATCTTTACCAGGAGTTTCTGT | 9322 |
| gb:MT027064 | Organism:Severe | ACTAGTGGTAGATGGGTACTTAACAATGATTATTACAGATCTTTACCAGGAGTTTCTGT | 9322 |
| gb:MN994468 | Organism:Severe | ACTAGTGGTAGATGGGTACTTAACAATGATTATTACAGATCTTTACCAGGAGTTTCTGT | 9322 |
| gb:MT072688 | Organism:Severe | ACTAGTGGTAGATGGGTACTTAACAATGATTATTACAGATCTTTACCAGGAGTTTCTGT | 9307 |
| gb:MN996527 | Organism:Severe | ACTAGTGGTAGATGGGTACTTAACAATGATTATTACAGATCTTTACCAGGAGTTTCTGT | 9289 |
| gb:MT093631 | Organism:Severe | ACTAGTGGTAGATGGGTACTTAACAATGATTATTACAGATCTTTACCAGGAGTTTCTGT | 9360 |
| gb:MT106053 | Organism:Severe | ACTAGTGGTAGATGGGTACTTAACAATGATTATTACAGATCTTTACCAGGAGTTTCTGT | 9322 |
| gb:MT019533 | Organism:Severe | ACTAGTGGTAGATGGGTACTTAACAATGATTATTACAGATCTTTACCAGGAGTTTCTGT | 9322 |
| gb:MT019531 | Organism:Severe | ACTAGTGGTAGATGGGTACTTAACAATGATTATTACAGATCTTTACCAGGAGTTTCTGT | 9322 |
| gb:MN996528 | Organism:Severe | ACTAGTGGTAGATGGGTACTTAACAATGATTATTACAGATCTTTACCAGGAGTTTCTGT | 9322 |
| gb:MN996530 | Organism:Severe | ACTAGTGGTAGATGGGTACTTAACAATGATTATTACAGATCTTTACCAGGAGTTTCTGT | 9308 |
| gb:MN908947 | Organism:Severe | ACTAGTGGTAGATGGGTACTTAACAATGATTATTACAGATCTTTACCAGGAGTTTCTGT | 9322 |
| gb:MT019532 | Organism:Severe | ACTAGTGGTAGATGGGTACTTAACAATGATTATTACAGATCTTTACCAGGAGTTTCTGT | 9322 |

\*\*\*\*\*

|             |                 |                                                            |      |
|-------------|-----------------|------------------------------------------------------------|------|
| gb:MT020781 | Organism:Severe | GGTGTAGATGCTGTAATTTACTTACTAATATGTTTACACCCTAATTCAACCTATTGGT | 9370 |
| gb:MT007544 | Organism:Severe | GGTGTAGATGCTGTAATTTACTTACTAATATGTTTACACCCTAATTCAACCTATTGGT | 9382 |
| gb:MN994467 | Organism:Severe | GGTGTAGATGCTGTAATTTACTTACTAATATGTTTACACCCTAATTCAACCTATTGGT | 9382 |
| gb:MT044257 | Organism:Severe | GGTGTAGATGCTGTAATTTACTTACTAATATGTTTACACCCTAATTCAACCTATTGGT | 9382 |
| gb:MT106054 | Organism:Severe | GGTGTAGATGCTGTAATTTACTTACTAATATGTTTACACCCTAATTCAACCTATTGGT | 9382 |
| gb:MT049951 | Organism:Severe | GGTGTAGATGCTGTAATTTACTTACTAATATGTTTACACCCTAATTCAACCTATTGGT | 9382 |
| gb:MN975262 | Organism:Severe | GGTGTAGATGCTGTAATTTACTTACTAATATGTTTACACCCTAATTCAACCTATTGGT | 9382 |
| gb:MT106052 | Organism:Severe | GGTGTAGATGCTGTAATTTACTTACTAATATGTTTACACCCTAATTCAACCTATTGGT | 9382 |
| gb:LC522975 | Organism:Severe | GGTGTAGATGCTGTAATTTACTTACTAATATGTTTACACCCTAATTCAACCTATTGGT | 9379 |
| gb:LC522973 | Organism:Severe | GGTGTAGATGCTGTAATTTACTTACTAATATGTTTACACCCTAATTCAACCTATTGGT | 9379 |
| gb:LC522974 | Organism:Severe | GGTGTAGATGCTGTAATTTACTTACTAATATGTTTACACCCTAATTCAACCTATTGGT | 9379 |
| gb:MN985325 | Organism:Severe | GGTGTAGATGCTGTAATTTACTTACTAATATGTTTACACCCTAATTCAACCTATTGGT | 9382 |
| gb:MT020881 | Organism:Severe | GGTGTAGATGCTGTAATTTACTTACTAATATGTTTACACCCTAATTCAACCTATTGGT | 9382 |
| gb:MT020880 | Organism:Severe | GGTGTAGATGCTGTAATTTACTTACTAATATGTTTACACCCTAATTCAACCTATTGGT | 9382 |
| gb:MT066175 | Organism:Severe | GGTGTAGATGCTGTAATTTACTTACTAATATGTTTACACCCTAATTCAACCTATTGGT | 9382 |
| gb:MN997409 | Organism:Severe | GGTGTAGATGCTGTAATTTACTTACTAATATGTTTACACCCTAATTCAACCTATTGGT | 9382 |
| gb:MN938384 | Organism:Severe | GGTGTAGATGCTGTAATTTACTTACTAATATGTTTACACCCTAATTCAACCTATTGGT | 9350 |
| gb:MT044258 | Organism:Severe | GGTGTAGATGCTGTAATTTACTTACTAATATGTTTACACCCTAATTCAACCTATTGGT | 9358 |
| gb:MT039890 | Organism:Severe | GGTGTAGATGCTGTAATTTACTTACTAATATGTTTACACCCTAATTCAACCTATTGGT | 9382 |
| gb:MN988713 | Organism:Severe | GGTGTAGATGCTGTAATTTACTTACTAATATGTTTACACCCTAATTCAACCTATTGGT | 9382 |
| gb:LC521925 | Organism:Severe | GGTGTAGATGCTGTAATTTACTTACTAATATGTTTACACCCTAATTCAACCTATTGGT | 9355 |
| gb:MT093571 | Organism:Severe | GGTGTAGATGCTGTAATTTACTTACTAATATGTTTACACCCTAATTCAACCTATTGGT | 9382 |
| gb:MT039887 | Organism:Severe | GGTGTAGATGCTGTAATTTACTTACTAATATGTTTACACCCTAATTCAACCTATTGGT | 9382 |
| gb:MT019530 | Organism:Severe | GGTGTAGATGCTGTAATTTACTTACTAATATGTTTACACCCTAATTCAACCTATTGGT | 9382 |
| gb:MT039888 | Organism:Severe | GGTGTAGATGCTGTAATTTACTTACTAATATGTTTACACCCTAATTCAACCTATTGGT | 9382 |
| gb:LC522972 | Organism:Severe | GGTGTAGATGCTGTAATTTACTTACTAATATGTTTACACCCTAATTCAACCTATTGGT | 9379 |
| gb:MT027063 | Organism:Severe | GGTGTAGATGCTGTAATTTACTTACTAATATGTTTACACCCTAATTCAACCTATTGGT | 9382 |
| gb:MT027062 | Organism:Severe | GGTGTAGATGCTGTAATTTACTTACTAATATGTTTACACCCTAATTCAACCTATTGGT | 9382 |
| gb:MT019529 | Organism:Severe | GGTGTAGATGCTGTAATTTACTTACTAATATGTTTACACCCTAATTCAACCTATTGGT | 9382 |
| gb:MN996529 | Organism:Severe | GGTGTAGATGCTGTAATTTACTTACTAATATGTTTACACCCTAATTCAACCTATTGGT | 9370 |
| gb:MN996531 | Organism:Severe | GGTGTAGATGCTGTAATTTACTTACTAATATGTTTACACCCTAATTCAACCTATTGGT | 9369 |
| gb:MT066176 | Organism:Severe | GGTGTAGATGCTGTAATTTACTTACTAATATGTTTACACCCTAATTCAACCTATTGGT | 9382 |
| gb:MT027064 | Organism:Severe | GGTGTAGATGCTGTAATTTACTTACTAATATGTTTACACCCTAATTCAACCTATTGGT | 9382 |
| gb:MN994468 | Organism:Severe | GGTGTAGATGCTGTAATTTACTTACTAATATGTTTACACCCTAATTCAACCTATTGGT | 9382 |
| gb:MT072688 | Organism:Severe | GGTGTAGATGCTGTAATTTACTTACTAATATGTTTACACCCTAATTCAACCTATTGGT | 9367 |



|             |                 |                                                            |      |
|-------------|-----------------|------------------------------------------------------------|------|
| gb:MN996527 | Organism:Severe | GGTGTAGATGCTGTAATTTACTTACTAATATGTTTACACCCTAATTCAACCTATTGGT | 9349 |
| gb:MT093631 | Organism:Severe | GGTGTAGATGCTGTAATTTACTTACTAATATGTTTACACCCTAATTCAACCTATTGGT | 9420 |
| gb:MT106053 | Organism:Severe | GGTGTAGATGCTGTAATTTACTTACTAATATGTTTACACCCTAATTCAACCTATTGGT | 9382 |
| gb:MT019533 | Organism:Severe | GGTGTAGATGCTGTAATTTACTTACTAATATGTTTACACCCTAATTCAACCTATTGGT | 9382 |
| gb:MT019531 | Organism:Severe | GGTGTAGATGCTGTAATTTACTTACTAATATGTTTACACCCTAATTCAACCTATTGGT | 9382 |
| gb:MN996528 | Organism:Severe | GGTGTAGATGCTGTAATTTACTTACTAATATGTTTACACCCTAATTCAACCTATTGGT | 9382 |
| gb:MN996530 | Organism:Severe | GGTGTAGATGCTGTAATTTACTTACTAATATGTTTACACCCTAATTCAACCTATTGGT | 9368 |
| gb:MN908947 | Organism:Severe | GGTGTAGATGCTGTAATTTACTTACTAATATGTTTACACCCTAATTCAACCTATTGGT | 9382 |
| gb:MT019532 | Organism:Severe | GGTGTAGATGCTGTAATTTACTTACTAATATGTTTACACCCTAATTCAACCTATTGGT | 9382 |

\*\*\*\*\*

|             |                 |                                                              |      |
|-------------|-----------------|--------------------------------------------------------------|------|
| gb:MT020781 | Organism:Severe | GCTTTGGACATATCAGCATCTATAGTAGCTGGTGGTATTGTAGCTATCGTAGTAACATGC | 9430 |
| gb:MT007544 | Organism:Severe | GCTTTGGACATATCAGCATCTATAGTAGCTGGTGGTATTGTAGCTATCGTAGTAACATGC | 9442 |
| gb:MN994467 | Organism:Severe | GCTTTGGACATATCAGCATCTATAGTAGCTGGTGGTATTGTAGCTATCGTAGTAACATGC | 9442 |
| gb:MT044257 | Organism:Severe | GCTTTGGACATATCAGCATCTATAGTAGCTGGTGGTATTGTAGCTATCGTAGTAACATGC | 9442 |
| gb:MT106054 | Organism:Severe | GCTTTGGACATATCAGCATCTATAGTAGCTGGTGGTATTGTAGCTATCGTAGTAACATGC | 9442 |
| gb:MT049951 | Organism:Severe | GCTTTGGACATATCAGCATCTATAGTAGCTGGTGGTATTGTAGCTATCGTAGTAACATGC | 9442 |
| gb:MN975262 | Organism:Severe | GCTTTGGACATATCAGCATCTATAGTAGCTGGTGGTATTGTAGCTATCGTAGTAACATGC | 9442 |
| gb:MT106052 | Organism:Severe | GCTTTGGACATATCAGCATCTATAGTAGCTGGTGGTATTGTAGCTATCGTAGTAACATGC | 9442 |
| gb:LC522975 | Organism:Severe | GCTTTGGACATATCAGCATCTATAGTAGCTGGTGGTATTGTAGCTATCGTAGTAACATGC | 9439 |
| gb:LC522973 | Organism:Severe | GCTTTGGACATATCAGCATCTATAGTAGCTGGTGGTATTGTAGCTATCGTAGTAACATGC | 9439 |
| gb:LC522974 | Organism:Severe | GCTTTGGACATATCAGCATCTATAGTAGCTGGTGGTATTGTAGCTATCGTAGTAACATGC | 9439 |
| gb:MN985325 | Organism:Severe | GCTTTGGACATATCAGCATCTATAGTAGCTGGTGGTATTGTAGCTATCGTAGTAACATGC | 9442 |
| gb:MT020881 | Organism:Severe | GCTTTGGACATATCAGCATCTATAGTAGCTGGTGGTATTGTAGCTATCGTAGTAACATGC | 9442 |
| gb:MT020880 | Organism:Severe | GCTTTGGACATATCAGCATCTATAGTAGCTGGTGGTATTGTAGCTATCGTAGTAACATGC | 9442 |
| gb:MT066175 | Organism:Severe | GCTTTGGACATATCAGCATCTATAGTAGCTGGTGGTATTGTAGCTATCGTAGTAACATGC | 9442 |
| gb:MN997409 | Organism:Severe | GCTTTGGACATATCAGCATCTATAGTAGCTGGTGGTATTGTAGCTATCGTAGTAACATGC | 9442 |
| gb:MN938384 | Organism:Severe | GCTTTGGACATATCAGCATCTATAGTAGCTGGTGGTATTGTAGCTATCGTAGTAACATGC | 9410 |
| gb:MT044258 | Organism:Severe | GCTTTGGACATATCAGCATCTATAGTAGCTGGTGGTATTGTAGCTATCGTAGTAACATGC | 9418 |
| gb:MT039890 | Organism:Severe | GCTTTGGACATATCAGCATCTATAGTAGCTGGTGGTATTGTAGCTATCGTAGTAACATGC | 9442 |
| gb:MN988713 | Organism:Severe | GCTTTGGACATATCAGCATCTATAGTAGCTGGTGGTATTGTAGCTATCGTAGTAACATGC | 9442 |
| gb:LC521925 | Organism:Severe | GCTTTGGACATATCAGCATCTATAGTAGCTGGTGGTATTGTAGCTATCGTAGTAACATGC | 9415 |
| gb:MT093571 | Organism:Severe | GCTTTGGACATATCAGCATCTATAGTAGCTGGTGGTATTGTAGCTATCGTAGTAACATGC | 9442 |
| gb:MT039887 | Organism:Severe | GCTTTGGACATATCAGCATCTATAGTAGCTGGTGGTATTGTAGCTATCGTAGTAACATGC | 9442 |
| gb:MT019530 | Organism:Severe | GCTTTGGACATATCAGCATCTATAGTAGCTGGTGGTATTGTAGCTATCGTAGTAACATGC | 9442 |
| gb:MT039888 | Organism:Severe | GCTTTGGACATATCAGCATCTATAGTAGCTGGTGGTATTGTAGCTATCGTAGTAACATGC | 9442 |
| gb:LC522972 | Organism:Severe | GCTTTGGACATATCAGCATCTATAGTAGCTGGTGGTATTGTAGCTATCGTAGTAACATGC | 9439 |
| gb:MT027063 | Organism:Severe | GCTTTGGACATATCAGCATCTATAGTAGCTGGTGGTATTGTAGCTATCGTAGTAACATGC | 9442 |
| gb:MT027062 | Organism:Severe | GCTTTGGACATATCAGCATCTATAGTAGCTGGTGGTATTGTAGCTATCGTAGTAACATGC | 9442 |
| gb:MT019529 | Organism:Severe | GCTTTGGACATATCAGCATCTATAGTAGCTGGTGGTATTGTAGCTATCGTAGTAACATGC | 9442 |
| gb:MN996529 | Organism:Severe | GCTTTGGACATATCAGCATCTATAGTAGCTGGTGGTATTGTAGCTATCGTAGTAACATGC | 9430 |
| gb:MN996531 | Organism:Severe | GCTTTGGACATATCAGCATCTATAGTAGCTGGTGGTATTGTAGCTATCGTAGTAACATGC | 9429 |
| gb:MT066176 | Organism:Severe | GCTTTGGACATATCAGCATCTATAGTAGCTGGTGGTATTGTAGCTATCGTAGTAACATGC | 9442 |
| gb:MT027064 | Organism:Severe | GCTTTGGACATATCAGCATCTATAGTAGCTGGTGGTATTGTAGCTATCGTAGTAACATGC | 9442 |
| gb:MN994468 | Organism:Severe | GCTTTGGACATATCAGCATCTATAGTAGCTGGTGGTATTGTAGCTATCGTAGTAACATGC | 9442 |
| gb:MT072688 | Organism:Severe | GCTTTGGACATATCAGCATCTATAGTAGCTGGTGGTATTGTAGCTATCGTAGTAACATGC | 9427 |
| gb:MN996527 | Organism:Severe | GCTTTGGACATATCAGCATCTATAGTAGCTGGTGGTATTGTAGCTATCGTAGTAACATGC | 9409 |
| gb:MT093631 | Organism:Severe | GCTTTGGACATATCAGCATCTATAGTAGCTGGTGGTATTGTAGCTATCGTAGTAACATGC | 9480 |
| gb:MT106053 | Organism:Severe | GCTTTGGACATATCAGCATCTATAGTAGCTGGTGGTATTGTAGCTATCGTAGTAACATGC | 9442 |
| gb:MT019533 | Organism:Severe | GCTTTGGACATATCAGCATCTATAGTAGCTGGTGGTATTGTAGCTATCGTAGTAACATGC | 9442 |
| gb:MT019531 | Organism:Severe | GCTTTGGACATATCAGCATCTATAGTAGCTGGTGGTATTGTAGCTATCGTAGTAACATGC | 9442 |
| gb:MN996528 | Organism:Severe | GCTTTGGACATATCAGCATCTATAGTAGCTGGTGGTATTGTAGCTATCGTAGTAACATGC | 9442 |
| gb:MN996530 | Organism:Severe | GCTTTGGACATATCAGCATCTATAGTAGCTGGTGGTATTGTAGCTATCGTAGTAACATGC | 9428 |
| gb:MN908947 | Organism:Severe | GCTTTGGACATATCAGCATCTATAGTAGCTGGTGGTATTGTAGCTATCGTAGTAACATGC | 9442 |
| gb:MT019532 | Organism:Severe | GCTTTGGACATATCAGCATCTATAGTAGCTGGTGGTATTGTAGCTATCGTAGTAACATGC | 9442 |

\*\*\*\*\*

|             |                 |                                                              |      |
|-------------|-----------------|--------------------------------------------------------------|------|
| gb:MT020781 | Organism:Severe | CTTGCCTACTATTTTATGAGGTTTAGAAGAGCTTTTGGTGAATACAGTCATGTAGTTGCC | 9490 |
| gb:MT007544 | Organism:Severe | CTTGCCTACTATTTTATGAGGTTTAGAAGAGCTTTTGGTGAATACAGTCATGTAGTTGCC | 9502 |
| gb:MN994467 | Organism:Severe | CTTGCCTACTATTTTATGAGGTTTAGAAGAGCTTTTGGTGAATACAGTCATGTAGTTGCC | 9502 |
| gb:MT044257 | Organism:Severe | CTTGCCTACTATTTTATGAGGTTTAGAAGAGCTTTTGGTGAATACAGTCATGTAGTTGCC | 9502 |
| gb:MT106054 | Organism:Severe | CTTGCCTACTATTTTATGAGGTTTAGAAGAGCTTTTGGTGAATACAGTCATGTAGTTGCC | 9502 |
| gb:MT049951 | Organism:Severe | CTTGCCTACTATTTTATGAGGTTTAGAAGAGCTTTTGGTGAATACAGTCATGTAGTTGCC | 9502 |
| gb:MN975262 | Organism:Severe | CTTGCCTACTATTTTATGAGGTTTAGAAGAGCTTTTGGTGAATACAGTCATGTAGTTGCC | 9502 |
| gb:MT106052 | Organism:Severe | CTTGCCTACTATTTTATGAGGTTTAGAAGAGCTTTTGGTGAATACAGTCATGTAGTTGCC | 9502 |

|             |                 |                                                              |      |
|-------------|-----------------|--------------------------------------------------------------|------|
| gb:LC522975 | Organism:Severe | CTTGCCTACTATTTTATGAGGTTTAGAAGAGCTTTTGGTGAATACAGTCATGTAGTTGCC | 9499 |
| gb:LC522973 | Organism:Severe | CTTGCCTACTATTTTATGAGGTTTAGAAGAGCTTTTGGTGAATACAGTCATGTAGTTGCC | 9499 |
| gb:LC522974 | Organism:Severe | CTTGCCTACTATTTTATGAGGTTTAGAAGAGCTTTTGGTGAATACAGTCATGTAGTTGCC | 9499 |
| gb:MN985325 | Organism:Severe | CTTGCCTACTATTTTATGAGGTTTAGAAGAGCTTTTGGTGAATACAGTCATGTAGTTGCC | 9502 |
| gb:MT020881 | Organism:Severe | CTTGCCTACTATTTTATGAGGTTTAGAAGAGCTTTTGGTGAATACAGTCATGTAGTTGCC | 9502 |
| gb:MT020880 | Organism:Severe | CTTGCCTACTATTTTATGAGGTTTAGAAGAGCTTTTGGTGAATACAGTCATGTAGTTGCC | 9502 |
| gb:MT066175 | Organism:Severe | CTTGCCTACTATTTTATGAGGTTTAGAAGAGCTTTTGGTGAATACAGTCATGTAGTTGCC | 9502 |
| gb:MN997409 | Organism:Severe | CTTGCCTACTATTTTATGAGGTTTAGAAGAGCTTTTGGTGAATACAGTCATGTAGTTGCC | 9502 |
| gb:MN938384 | Organism:Severe | CTTGCCTACTATTTTATGAGGTTTAGAAGAGCTTTTGGTGAATACAGTCATGTAGTTGCC | 9470 |
| gb:MT044258 | Organism:Severe | CTTGCCTACTATTTTATGAGGTTTAGAAGAGCTTTTGGTGAATACAGTCATGTAGTTGCC | 9478 |
| gb:MT039890 | Organism:Severe | CTTGCCTACTATTTTATGAGGTTTAGAAGAGCTTTTGGTGAATACAGTCATGTAGTTGCC | 9502 |
| gb:MN988713 | Organism:Severe | CTTGCCTACTATTTTATGAGGTTTAGAAGAGCTTTTGGTGAATACAGTCATGTAGTTGCC | 9502 |
| gb:LC521925 | Organism:Severe | CTTGCCTACTATTTTATGAGGTTTAGAAGAGCTTTTGGTGAATACAGTCATGTAGTTGCC | 9475 |
| gb:MT093571 | Organism:Severe | CTTGCCTACTATTTTATGAGGTTTAGAAGAGCTTTTGGTGAATACAGTCATGTAGTTGCC | 9502 |
| gb:MT039887 | Organism:Severe | CTTGCCTACTATTTTATGAGGTTTAGAAGAGCTTTTGGTGAATACAGTCATGTAGTTGCC | 9502 |
| gb:MT019530 | Organism:Severe | CTTGCCTACTATTTTATGAGGTTTAGAAGAGCTTTTGGTGAATACAGTCATGTAGTTGCC | 9502 |
| gb:MT039888 | Organism:Severe | CTTGCCTACTATTTTATGAGGTTTAGAAGAGCTTTTGGTGAATACAGTCATGTAGTTGCC | 9502 |
| gb:LC522972 | Organism:Severe | CTTGCCTACTATTTTATGAGGTTTAGAAGAGCTTTTGGTGAATACAGTCATGTAGTTGCC | 9499 |
| gb:MT027063 | Organism:Severe | CTTGCCTACTATTTTATGAGGTTTAGAAGAGCTTTTGGTGAATACAGTCATGTAGTTGCC | 9502 |
| gb:MT027062 | Organism:Severe | CTTGCCTACTATTTTATGAGGTTTAGAAGAGCTTTTGGTGAATACAGTCATGTAGTTGCC | 9502 |
| gb:MT019529 | Organism:Severe | CTTGCCTACTATTTTATGAGGTTTAGAAGAGCTTTTGGTGAATACAGTCATGTAGTTGCC | 9502 |
| gb:MN996529 | Organism:Severe | CTTGCCTACTATTTTATGAGGTTTAGAAGAGCTTTTGGTGAATACAGTCATGTAGTTGCC | 9490 |
| gb:MN996531 | Organism:Severe | CTTGCCTACTATTTTATGAGGTTTAGAAGAGCTTTTGGTGAATACAGTCATGTAGTTGCC | 9489 |
| gb:MT066176 | Organism:Severe | CTTGCCTACTATTTTATGAGGTTTAGAAGAGCTTTTGGTGAATACAGTTATGTAGTTGCC | 9502 |
| gb:MT027064 | Organism:Severe | CTTGCCTACTATTTTATGAGGTTTAGAAGAGCTTTTGGTGAATACAGTCATGTAGTTGCC | 9502 |
| gb:MN994468 | Organism:Severe | CTTGCCTACTATTTTATGAGGTTTAGAAGAGCTTTTGGTGAATACAGTCATGTAGTTGCC | 9502 |
| gb:MT072688 | Organism:Severe | CTTGCCTACTATTTTATGAGGTTTAGAAGAGCTTTTGGTGAATACAGTCATGTAGTTGCC | 9487 |
| gb:MN996527 | Organism:Severe | CTTGCCTACTATTTTATGAGGTTTAGAAGAGCTTTTGGTGAATACAGTCATGTAGTTGCC | 9469 |
| gb:MT093631 | Organism:Severe | CTTGCCTACTATTTTATGAGGTTTAGAAGAGCTTTTGGTGAATACAGTCATGTAGTTGCC | 9540 |
| gb:MT106053 | Organism:Severe | CTTGCCTACTATTTTATGAGGTTTAGAAGAGCTTTTGGTGAATACAGTCATGTAGTTGCC | 9502 |
| gb:MT019533 | Organism:Severe | CTTGCCTACTATTTTATGAGGTTTAGAAGAGCTTTTGGTGAATACAGTCATGTAGTTGCC | 9502 |
| gb:MT019531 | Organism:Severe | CTTGCCTACTATTTTATGAGGTTTAGAAGAGCTTTTGGTGAATACAGTCATGTAGTTGCC | 9502 |
| gb:MN996528 | Organism:Severe | CTTGCCTACTATTTTATGAGGTTTAGAAGAGCTTTTGGTGAATACAGTCATGTAGTTGCC | 9502 |
| gb:MN996530 | Organism:Severe | CTTGCCTACTATTTTATGAGGTTTAGAAGAGCTTTTGGTGAATACAGTCATGTAGTTGCC | 9488 |
| gb:MN908947 | Organism:Severe | CTTGCCTACTATTTTATGAGGTTTAGAAGAGCTTTTGGTGAATACAGTCATGTAGTTGCC | 9502 |
| gb:MT019532 | Organism:Severe | CTTGCCTACTATTTTATGAGGTTTAGAAGAGCTTTTGGTGAATACAGTCATGTAGTTGCC | 9502 |

\*\*\*\*\*

|             |                 |                                                             |      |
|-------------|-----------------|-------------------------------------------------------------|------|
| gb:MT020781 | Organism:Severe | TTTAATACTTTACTATTCCTTATGTCATTCACTGTACTCTGTTTAAACCAGTTTACTCA | 9550 |
| gb:MT007544 | Organism:Severe | TTTAATACTTTACTATTCCTTATGTCATTCACTGTACTCTGTTTAAACCAGTTTACTCA | 9562 |
| gb:MN994467 | Organism:Severe | TTTAATACTTTACTATTCCTTATGTCATTCACTGTACTCTGTTTAAACCAGTTTACTCA | 9562 |
| gb:MT044257 | Organism:Severe | TTTAATACTTTACTATTCCTTATGTCATTCACTGTACTCTGTTTAAACCAGTTTACTCA | 9562 |
| gb:MT106054 | Organism:Severe | TTTAATACTTTACTATTCCTTATGTCATTCACTGTACTCTGTTTAAACCAGTTTACTCA | 9562 |
| gb:MT049951 | Organism:Severe | TTTAATACTTTACTATTCCTTATGTCATTCACTGTACTCTGTTTAAACCAGTTTACTCA | 9562 |
| gb:MN975262 | Organism:Severe | TTTAATACTTTACTATTCCTTATGTCATTCACTGTACTCTGTTTAAACCAGTTTACTT  | 9562 |
| gb:MT106052 | Organism:Severe | TTTAATACTTTACTATTCCTTATGTCATTCACTGTACTCTGTTTAAACCAGTTTACTCA | 9562 |
| gb:LC522975 | Organism:Severe | TTTAATACTTTACTATTCCTTATGTCATTCACTGTACTCTGTTTAAACCAGTTTACTCA | 9559 |
| gb:LC522973 | Organism:Severe | TTTAATACTTTACTATTCCTTATGTCATTCACTGTACTCTGTTTAAACCAGTTTACTCA | 9559 |
| gb:LC522974 | Organism:Severe | TTTAATACTTTACTATTCCTTATGTCATTCACTGTACTCTGTTTAAACCAGTTTACTCA | 9559 |
| gb:MN985325 | Organism:Severe | TTTAATACTTTACTATTCCTTATGTCATTCACTGTACTCTGTTTAAACCAGTTTACTCA | 9562 |
| gb:MT020881 | Organism:Severe | TTTAATACTTTACTATTCCTTATGTCATTCACTGTACTCTGTTTAAACCAGTTTACTCA | 9562 |
| gb:MT020880 | Organism:Severe | TTTAATACTTTACTATTCCTTATGTCATTCACTGTACTCTGTTTAAACCAGTTTACTCA | 9562 |
| gb:MT066175 | Organism:Severe | TTTAATACTTTACTATTCCTTATGTCATTCACTGTACTCTGTTTAAACCAGTTTACTCA | 9562 |
| gb:MN997409 | Organism:Severe | TTTAATACTTTACTATTCCTTATGTCATTCACTGTACTCTGTTTAAACCAGTTTACTCA | 9562 |
| gb:MN938384 | Organism:Severe | TTTAATACTTTACTATTCCTTATGTCATTCACTGTACTCTGTTTAAACCAGTTTACTCA | 9530 |
| gb:MT044258 | Organism:Severe | TTTAATACTTTACTATTCCTTATGTCATTCACTGTACTCTGTTTAAACCAGTTTACTCA | 9538 |
| gb:MT039890 | Organism:Severe | TTTAATACTTTACTATTCCTTATGTCATTCACTGTACTCTGTTTAAACCAGTTTACTCA | 9562 |
| gb:MN988713 | Organism:Severe | TTTAATACTTTACTATTCCTTATGTCATTCACTGTACTCTGTTTAAACCAGTTTACTCA | 9562 |
| gb:LC521925 | Organism:Severe | TTTAATACTTTACTATTCCTTATGTCATTCACTGTACTCTGTTTAAACCAGTTTACTCA | 9535 |
| gb:MT093571 | Organism:Severe | TTTAATACTTTACTATTCCTTATGTCATTCACTGTACTCTGTTTAAACCAGTTTACTCA | 9562 |
| gb:MT039887 | Organism:Severe | TTTAATACTTTACTATTCCTTATGTCATTCACTGTACTCTGTTTAAACCAGTTTACTCA | 9562 |
| gb:MT019530 | Organism:Severe | TTTAATACTTTACTATTCCTTATGTCATTCACTGTACTCTGTTTAAACCAGTTTACTCA | 9562 |
| gb:MT039888 | Organism:Severe | TTTAATACTTTACTATTCCTTATGTCATTCACTGTACTCTGTTTAAACCAGTTTACTCA | 9562 |
| gb:LC522972 | Organism:Severe | TTTAATACTTTACTATTCCTTATGTCATTCACTGTACTCTGTTTAAACCAGTTTACTCA | 9559 |
| gb:MT027063 | Organism:Severe | TTTAATACTTTACTATTCCTTATGTCATTCACTGTACTCTGTTTAAACCAGTTTACTCA | 9562 |

|             |                 |                                                             |      |
|-------------|-----------------|-------------------------------------------------------------|------|
| gb:MT027062 | Organism:Severe | TTTAATACTTTACTATTCCCTTATGTCATTCCTGACTCTGTTTAAACACCAGTTACTCA | 9562 |
| gb:MT019529 | Organism:Severe | TTTAATACTTTACTATTCCCTTATGTCATTCCTGACTCTGTTTAAACACCAGTTACTCA | 9562 |
| gb:MN996529 | Organism:Severe | TTTAATACTTTACTATTCCCTTATGTCATTCCTGACTCTGTTTAAACACCAGTTACTCA | 9550 |
| gb:MN996531 | Organism:Severe | TTTAATACTTTACTATTCCCTTATGTCATTCCTGACTCTGTTTAAACACCAGTTACTCA | 9549 |
| gb:MT066176 | Organism:Severe | TTTAATACTTTACTATTCCCTTATGTCATTCCTGACTCTGTTTAAACACCAGTTACTCA | 9562 |
| gb:MT027064 | Organism:Severe | TTTAATACTTTACTATTCCCTTATGTCATTCCTGACTCTGTTTAAACACCAGTTACTCA | 9562 |
| gb:MN994468 | Organism:Severe | TTTAATACTTTACTATTCCCTTATGTCATTCCTGACTCTGTTTAAACACCAGTTACTCA | 9562 |
| gb:MT072688 | Organism:Severe | TTTAATACTTTACTATTCCCTTATGTCATTCCTGACTCTGTTTAAACACCAGTTACTCA | 9547 |
| gb:MN996527 | Organism:Severe | TTTAATACTTTACTATTCCCTTATGTCATTCCTGACTCTGTTTAAACACCAGTTACTCA | 9529 |
| gb:MT093631 | Organism:Severe | TTTAATACTTTACTATTCCCTTATGTCATTCCTGACTCTGTTTAAACACCAGTTACTCA | 9600 |
| gb:MT106053 | Organism:Severe | TTTAATACTTTACTATTCCCTTATGTCATTCCTGACTCTGTTTAAACACCAGTTACTCA | 9562 |
| gb:MT019533 | Organism:Severe | TTTAATACTTTACTATTCCCTTATGTCATTCCTGACTCTGTTTAAACACCAGTTACTCA | 9562 |
| gb:MT019531 | Organism:Severe | TTTAATACTTTACTATTCCCTTATGTCATTCCTGACTCTGTTTAAACACCAGTTACTCA | 9562 |
| gb:MN996528 | Organism:Severe | TTTAATACTTTACTATTCCCTTATGTCATTCCTGACTCTGTTTAAACACCAGTTACTCA | 9562 |
| gb:MN996530 | Organism:Severe | TTTAATACTTTACTATTCCCTTATGTCATTCCTGACTCTGTTTAAACACCAGTTACTCA | 9548 |
| gb:MN908947 | Organism:Severe | TTTAATACTTTACTATTCCCTTATGTCATTCCTGACTCTGTTTAAACACCAGTTACTCA | 9562 |
| gb:MT019532 | Organism:Severe | TTTAATACTTTACTATTCCCTTATGTCATTCCTGACTCTGTTTAAACACCAGTTACTCA | 9562 |

\*\*\*\*\*

|             |                 |                                                              |      |
|-------------|-----------------|--------------------------------------------------------------|------|
| gb:MT020781 | Organism:Severe | TTCTTACCTGGTGTTTATTCTGTTATTTACTTGTACTTGACATTTTATCTTACTAATGAT | 9610 |
| gb:MT007544 | Organism:Severe | TTCTTACCTGGTGTTTATTCTGTTATTTACTTGTACTTGACATTTTATCTTACTAATGAT | 9622 |
| gb:MN994467 | Organism:Severe | TTCTTACCTGGTGTTTATTCTGTTATTTACTTGTACTTGACATTTTATCTTACTAATGAT | 9622 |
| gb:MT044257 | Organism:Severe | TTCTTACCTGGTGTTTATTCTGTTATTTACTTGTACTTGACATTTTATCTTACTAATGAT | 9622 |
| gb:MT106054 | Organism:Severe | TTCTTACCTGGTGTTTATTCTGTTATTTACTTGTACTTGACATTTTATCTTACTAATGAT | 9622 |
| gb:MT049951 | Organism:Severe | TTCTTACCTGGTGTTTATTCTGTTATTTACTTGTACTTGACATTTTATCTTACTAATGAT | 9622 |
| gb:MN975262 | Organism:Severe | TTCTTACCTGGTGTTTATTCTGTTATTTACTTGTACTTGACATTTTATCTTACTAATGAT | 9622 |
| gb:MT106052 | Organism:Severe | TTCTTACCTGGTGTTTATTCTGTTATTTACTTGTACTTGACATTTTATCTTACTAATGAT | 9622 |
| gb:LC522975 | Organism:Severe | TTCTTACCTGGTGTTTATTCTGTTATTTACTTGTACTTGACATTTTATCTTACTAATGAT | 9619 |
| gb:LC522973 | Organism:Severe | TTCTTACCTGGTGTTTATTCTGTTATTTACTTGTACTTGACATTTTATCTTACTAATGAT | 9619 |
| gb:LC522974 | Organism:Severe | TTCTTACCTGGTGTTTATTCTGTTATTTACTTGTACTTGACATTTTATCTTACTAATGAT | 9619 |
| gb:MN985325 | Organism:Severe | TTCTTACCTGGTGTTTATTCTGTTATTTACTTGTACTTGACATTTTATCTTACTAATGAT | 9622 |
| gb:MT020881 | Organism:Severe | TTCTTACCTGGTGTTTATTCTGTTATTTACTTGTACTTGACATTTTATCTTACTAATGAT | 9622 |
| gb:MT020880 | Organism:Severe | TTCTTACCTGGTGTTTATTCTGTTATTTACTTGTACTTGACATTTTATCTTACTAATGAT | 9622 |
| gb:MT066175 | Organism:Severe | TTCTTACCTGGTGTTTATTCTGTTATTTACTTGTACTTGACATTTTATCTTACTAATGAT | 9622 |
| gb:MN997409 | Organism:Severe | TTCTTACCTGGTGTTTATTCTGTTATTTACTTGTACTTGACATTTTATCTTACTAATGAT | 9622 |
| gb:MN938384 | Organism:Severe | TTCTTACCTGGTGTTTATTCTGTTATTTACTTGTACTTGACATTTTATCTTACTAATGAT | 9590 |
| gb:MT044258 | Organism:Severe | TTCTTACCTGGTGTTTATTCTGTTATTTACTTGTACTTGACATTTTATCTTACTAATGAT | 9598 |
| gb:MT039890 | Organism:Severe | TTCTTACCTGGTGTTTATTCTGTTATTTACTTGTACTTGACATTTTATCTTACTAATGAT | 9622 |
| gb:MN988713 | Organism:Severe | TTCTTACCTGGTGTTTATTCTGTTATTTACTTGTACTTGACATTTTATCTTACTAATGAT | 9622 |
| gb:LC521925 | Organism:Severe | TTCTTACCTGGTGTTTATTCTGTTATTTACTTGTACTTGACATTTTATCTTACTAATGAT | 9595 |
| gb:MT093571 | Organism:Severe | TTCTTACCTGGTGTTTATTCTGTTATTTACTTGTACTTGACATTTTATCTTACTAATGAT | 9622 |
| gb:MT039887 | Organism:Severe | TTCTTACCTGGTGTTTATTCTGTTATTTACTTGTACTTGACATTTTATCTTACTAATGAT | 9622 |
| gb:MT019530 | Organism:Severe | TTCTTACCTGGTGTTTATTCTGTTATTTACTTGTACTTGACATTTTATCTTACTAATGAT | 9622 |
| gb:MT039888 | Organism:Severe | TTCTTACCTGGTGTTTATTCTGTTATTTACTTGTACTTGACATTTTATCTTACTAATGAT | 9622 |
| gb:LC522972 | Organism:Severe | TTCTTACCTGGTGTTTATTCTGTTATTTACTTGTACTTGACATTTTATCTTACTAATGAT | 9619 |
| gb:MT027063 | Organism:Severe | TTCTTACCTGGTGTTTATTCTGTTATTTACTTGTACTTGACATTTTATCTTACTAATGAT | 9622 |
| gb:MT027062 | Organism:Severe | TTCTTACCTGGTGTTTATTCTGTTATTTACTTGTACTTGACATTTTATCTTACTAATGAT | 9622 |
| gb:MT019529 | Organism:Severe | TTCTTACCTGGTGTTTATTCTGTTATTTACTTGTACTTGACATTTTATCTTACTAATGAT | 9622 |
| gb:MN996529 | Organism:Severe | TTCTTACCTGGTGTTTATTCTGTTATTTACTTGTACTTGACATTTTATCTTACTAATGAT | 9610 |
| gb:MN996531 | Organism:Severe | TTCTTACCTGGTGTTTATTCTGTTATTTACTTGTACTTGACATTTTATCTTACTAATGAT | 9609 |
| gb:MT066176 | Organism:Severe | TTCTTACCTGGTGTTTATTCTGTTATTTACTTGTACTTGACATTTTATCTTACTAATGAT | 9622 |
| gb:MT027064 | Organism:Severe | TTCTTACCTGGTGTTTATTCTGTTATTTACTTGTACTTGACATTTTATCTTACTAATGAT | 9622 |
| gb:MN994468 | Organism:Severe | TTCTTACCTGGTGTTTATTCTGTTATTTACTTGTACTTGACATTTTATCTTACTAATGAT | 9622 |
| gb:MT072688 | Organism:Severe | TTCTTACCTGGTGTTTATTCTGTTATTTACTTGTACTTGACATTTTATCTTACTAATGAT | 9607 |
| gb:MN996527 | Organism:Severe | TTCTTACCTGGTGTTTATTCTGTTATTTACTTGTACTTGACATTTTATCTTACTAATGAT | 9589 |
| gb:MT093631 | Organism:Severe | TTCTTACCTGGTGTTTATTCTGTTATTTACTTGTACTTGACATTTTATCTTACTAATGAT | 9660 |
| gb:MT106053 | Organism:Severe | TTCTTACCTGGTGTTTATTCTGTTATTTACTTGTACTTGACATTTTATCTTACTAATGAT | 9622 |
| gb:MT019533 | Organism:Severe | TTCTTACCTGGTGTTTATTCTGTTATTTACTTGTACTTGACATTTTATCTTACTAATGAT | 9622 |
| gb:MT019531 | Organism:Severe | TTCTTACCTGGTGTTTATTCTGTTATTTACTTGTACTTGACATTTTATCTTACTAATGAT | 9622 |
| gb:MN996528 | Organism:Severe | TTCTTACCTGGTGTTTATTCTGTTATTTACTTGTACTTGACATTTTATCTTACTAATGAT | 9622 |
| gb:MN996530 | Organism:Severe | TTCTTACCTGGTGTTTATTCTGTTATTTACTTGTACTTGACATTTTATCTTACTAATGAT | 9608 |
| gb:MN908947 | Organism:Severe | TTCTTACCTGGTGTTTATTCTGTTATTTACTTGTACTTGACATTTTATCTTACTAATGAT | 9622 |
| gb:MT019532 | Organism:Severe | TTCTTACCTGGTGTTTATTCTGTTATTTACTTGTACTTGACATTTTATCTTACTAATGAT | 9622 |

\*\*\*\*\*

|             |                 |                                                             |      |
|-------------|-----------------|-------------------------------------------------------------|------|
| gb:MT020781 | Organism:Severe | GTTTCTTTTTAGCACATATTCAGTGGATGGTTATGTTCCACACCTTAGTACCTTTCTGG | 9670 |
| gb:MT007544 | Organism:Severe | GTTTCTTTTTAGCACATATTCAGTGGATGGTTATGTTCCACACCTTAGTACCTTTCTGG | 9682 |
| gb:MN994467 | Organism:Severe | GTTTCTTTTTAGCACATATTCAGTGGATGGTTATGTTCCACACCTTAGTACCTTTCTGG | 9682 |
| gb:MT044257 | Organism:Severe | GTTTCTTTTTAGCACATATTCAGTGGATGGTTATGTTCCACACCTTAGTACCTTTCTGG | 9682 |
| gb:MT106054 | Organism:Severe | GTTTCTTTTTAGCACATATTCAGTGGATGGTTATGTTCCACACCTTAGTACCTTTCTGG | 9682 |
| gb:MT049951 | Organism:Severe | GTTTCTTTTTAGCACATATTCAGTGGATGGTTATGTTCCACACCTTAGTACCTTTCTGG | 9682 |
| gb:MN975262 | Organism:Severe | GTTTCTTTTTAGCACATATTCAGTGGATGGTTATGTTCCACACCTTAGTACCTTTCTGG | 9682 |
| gb:MT106052 | Organism:Severe | GTTTCTTTTTAGCACATATTCAGTGGATGGTTATGTTCCACACCTTAGTACCTTTCTGG | 9682 |
| gb:LC522975 | Organism:Severe | GTTTCTTTTTAGCACATATTCAGTGGATGGTTATGTTCCACACCTTAGTACCTTTCTGG | 9679 |
| gb:LC522973 | Organism:Severe | GTTTCTTTTTAGCACATATTCAGTGGATGGTTATGTTCCACACCTTAGTACCTTTCTGG | 9679 |
| gb:LC522974 | Organism:Severe | GTTTCTTTTTAGCACATATTCAGTGGATGGTTATGTTCCACACCTTAGTACCTTTCTGG | 9679 |
| gb:MN985325 | Organism:Severe | GTTTCTTTTTAGCACATATTCAGTGGATGGTTATGTTCCACACCTTAGTACCTTTCTGG | 9682 |
| gb:MT020881 | Organism:Severe | GTTTCTTTTTAGCACATATTCAGTGGATGGTTATGTTCCACACCTTAGTACCTTTCTGG | 9682 |
| gb:MT020880 | Organism:Severe | GTTTCTTTTTAGCACATATTCAGTGGATGGTTATGTTCCACACCTTAGTACCTTTCTGG | 9682 |
| gb:MT066175 | Organism:Severe | GTTTCTTTTTAGCACATATTCAGTGGATGGTTATGTTCCACACCTTAGTACCTTTCTGG | 9682 |
| gb:MN997409 | Organism:Severe | GTTTCTTTTTAGCACATATTCAGTGGATGGTTATGTTCCACACCTTAGTACCTTTCTGG | 9682 |
| gb:MN938384 | Organism:Severe | GTTTCTTTTTAGCACATATTCAGTGGATGGTTATGTTCCACACCTTAGTACCTTTCTGG | 9650 |
| gb:MT044258 | Organism:Severe | GTTTCTTTTTAGCACATATTCAGTGGATGGTTATGTTCCACACCTTAGTACCTTTCTGG | 9658 |
| gb:MT039890 | Organism:Severe | GTTTCTTTTTAGCACATATTCAGTGGATGGTTATGTTCCACACCTTAGTACCTTTCTGG | 9682 |
| gb:MN988713 | Organism:Severe | GTTTCTTTTTAGCACATATTCAGTGGATGGTTATGTTCCACACCTTAGTACCTTTCTGG | 9682 |
| gb:LC521925 | Organism:Severe | GTTTCTTTTTAGCACATATTCAGTGGATGGTTATGTTCCACACCTTAGTACCTTTCTGG | 9655 |
| gb:MT093571 | Organism:Severe | GTTTCTTTTTAGCACATATTCAGTGGATGGTTATGTTCCACACCTTAGTACCTTTCTGG | 9682 |
| gb:MT039887 | Organism:Severe | GTTTCTTTTTAGCACATATTCAGTGGATGGTTATGTTCCACACCTTAGTACCTTTCTGG | 9682 |
| gb:MT019530 | Organism:Severe | GTTTCTTTTTAGCACATATTCAGTGGATGGTTATGTTCCACACCTTAGTACCTTTCTGG | 9682 |
| gb:MT039888 | Organism:Severe | GTTTCTTTTTAGCACATATTCAGTGGATGGTTATGTTCCACACCTTAGTACCTTTCTGG | 9682 |
| gb:LC522972 | Organism:Severe | GTTTCTTTTTAGCACATATTCAGTGGATGGTTATGTTCCACACCTTAGTACCTTTCTGG | 9679 |
| gb:MT027063 | Organism:Severe | GTTTCTTTTTAGCACATATTCAGTGGATGGTTATGTTCCACACCTTAGTACCTTTCTGG | 9682 |
| gb:MT027062 | Organism:Severe | GTTTCTTTTTAGCACATATTCAGTGGATGGTTATGTTCCACACCTTAGTACCTTTCTGG | 9682 |
| gb:MT019529 | Organism:Severe | GTTTCTTTTTAGCACATATTCAGTGGATGGTTATGTTCCACACCTTAGTACCTTTCTGG | 9682 |
| gb:MN996529 | Organism:Severe | GTTTCTTTTTAGCACATATTCAGTGGATGGTTATGTTCCACACCTTAGTACCTTTCTGG | 9670 |
| gb:MN996531 | Organism:Severe | GTTTCTTTTTAGCACATATTCAGTGGATGGTTATGTTCCACACCTTAGTACCTTTCTGG | 9669 |
| gb:MT066176 | Organism:Severe | GTTTCTTTTTAGCACATATTCAGTGGATGGTTATGTTCCACACCTTAGTACCTTTCTGG | 9682 |
| gb:MT027064 | Organism:Severe | GTTTCTTTTTAGCACATATTCAGTGGATGGTTATGTTCCACACCTTAGTACCTTTCTGG | 9682 |
| gb:MN994468 | Organism:Severe | GTTTCTTTTTAGCACATATTCAGTGGATGGTTATGTTCCACACCTTAGTACCTTTCTGG | 9682 |
| gb:MT072688 | Organism:Severe | GTTTCTTTTTAGCACATATTCAGTGGATGGTTATGTTCCACACCTTAGTACCTTTCTGG | 9667 |
| gb:MN996527 | Organism:Severe | GTTTCTTTTTAGCACATATTCAGTGGATGGTTATGTTCCACACCTTAGTACCTTTCTGG | 9649 |
| gb:MT093631 | Organism:Severe | GTTTCTTTTTAGCACATATTCAGTGGATGGTTATGTTCCACACCTTAGTACCTTTCTGG | 9720 |
| gb:MT106053 | Organism:Severe | GTTTCTTTTTAGCACATATTCAGTGGATGGTTATGTTCCACACCTTAGTACCTTTCTGG | 9682 |
| gb:MT019533 | Organism:Severe | GTTTCTTTTTAGCACATATTCAGTGGATGGTTATGTTCCACACCTTAGTACCTTTCTGG | 9682 |
| gb:MT019531 | Organism:Severe | GTTTCTTTTTAGCACATATTCAGTGGATGGTTATGTTCCACACCTTAGTACCTTTCTGG | 9682 |
| gb:MN996528 | Organism:Severe | GTTTCTTTTTAGCACATATTCAGTGGATGGTTATGTTCCACACCTTAGTACCTTTCTGG | 9682 |
| gb:MN996530 | Organism:Severe | GTTTCTTTTTAGCACATATTCAGTGGATGGTTATGTTCCACACCTTAGTACCTTTCTGG | 9668 |
| gb:MN908947 | Organism:Severe | GTTTCTTTTTAGCACATATTCAGTGGATGGTTATGTTCCACACCTTAGTACCTTTCTGG | 9682 |
| gb:MT019532 | Organism:Severe | GTTTCTTTTTAGCACATATTCAGTGGATGGTTATGTTCCACACCTTAGTACCTTTCTGG | 9682 |

\*\*\*\*\*

|             |                 |                                                            |      |
|-------------|-----------------|------------------------------------------------------------|------|
| gb:MT020781 | Organism:Severe | ATAACAATTGCTTATATCATTGTATTTCCACAAAGCATTCTATTGGTTCCTTAGTAAT | 9730 |
| gb:MT007544 | Organism:Severe | ATAACAATTGCTTATATCATTGTATTTCCACAAAGCATTCTATTGGTTCCTTAGTAAT | 9742 |
| gb:MN994467 | Organism:Severe | ATAACAATTGCTTATATCATTGTATTTCCACAAAGCATTCTATTGGTTCCTTAGTAAT | 9742 |
| gb:MT044257 | Organism:Severe | ATAACAATTGCTTATATCATTGTATTTCCACAAAGCATTCTATTGGTTCCTTAGTAAT | 9742 |
| gb:MT106054 | Organism:Severe | ATAACAATTGCTTATATCATTGTATTTCCACAAAGCATTCTATTGGTTCCTTAGTAAT | 9742 |
| gb:MT049951 | Organism:Severe | ATAACAATTGCTTATATCATTGTATTTCCACAAAGCATTCTATTGGTTCCTTAGTAAT | 9742 |
| gb:MN975262 | Organism:Severe | ATAACAATTGCTTATATCATTGTATTTCCACAAAGCATTCTATTGGTTCCTTAGTAAT | 9742 |
| gb:MT106052 | Organism:Severe | ATAACAATTGCTTATATCATTGTATTTCCACAAAGCATTCTATTGGTTCCTTAGTAAT | 9742 |
| gb:LC522975 | Organism:Severe | ATAACAATTGCTTATATCATTGTATTTCCACAAAGCATTCTATTGGTTCCTTAGTAAT | 9739 |
| gb:LC522973 | Organism:Severe | ATAACAATTGCTTATATCATTGTATTTCCACAAAGCATTCTATTGGTTCCTTAGTAAT | 9739 |
| gb:LC522974 | Organism:Severe | ATAACAATTGCTTATATCATTGTATTTCCACAAAGCATTCTATTGGTTCCTTAGTAAT | 9739 |
| gb:MN985325 | Organism:Severe | ATAACAATTGCTTATATCATTGTATTTCCACAAAGCATTCTATTGGTTCCTTAGTAAT | 9742 |
| gb:MT020881 | Organism:Severe | ATAACAATTGCTTATATCATTGTATTTCCACAAAGCATTCTATTGGTTCCTTAGTAAT | 9742 |
| gb:MT020880 | Organism:Severe | ATAACAATTGCTTATATCATTGTATTTCCACAAAGCATTCTATTGGTTCCTTAGTAAT | 9742 |
| gb:MT066175 | Organism:Severe | ATAACAATTGCTTATATCATTGTATTTCCACAAAGCATTCTATTGGTTCCTTAGTAAT | 9742 |
| gb:MN997409 | Organism:Severe | ATAACAATTGCTTATATCATTGTATTTCCACAAAGCATTCTATTGGTTCCTTAGTAAT | 9742 |
| gb:MN938384 | Organism:Severe | ATAACAATTGCTTATATCATTGTATTTCCACAAAGCATTCTATTGGTTCCTTAGTAAT | 9710 |
| gb:MT044258 | Organism:Severe | ATAACAATTGCTTATATCATTGTATTTCCACAAAGCATTCTATTGGTTCCTTAGTAAT | 9718 |
| gb:MT039890 | Organism:Severe | ATAACAATTGCTTATATCATTGTATTTCCACAAAGCATTCTATTGGTTCCTTAGTAAT | 9742 |

|             |                 |                                                              |      |
|-------------|-----------------|--------------------------------------------------------------|------|
| gb:MN988713 | Organism:Severe | ATAACAATTGCTTATATCATTTGTATTTCCACAAAGCATTTCTATTGGTTCCTTAGTAAT | 9742 |
| gb:LC521925 | Organism:Severe | ATAACAATTGCTTATATCATTTGTATTTCCACAAAGCATTTCTATTGGTTCCTTAGTAAT | 9715 |
| gb:MT093571 | Organism:Severe | ATAACAATTGCTTATATCATTTGTATTTCCACAAAGCATTTCTATTGGTTCCTTAGTAAT | 9742 |
| gb:MT039887 | Organism:Severe | ATAACAATTGCTTATATCATTTGTATTTCCACAAAGCATTTCTATTGGTTCCTTAGTAAT | 9742 |
| gb:MT019530 | Organism:Severe | ATAACAATTGCTTATATCATTTGTATTTCCACAAAGCATTTCTATTGGTTCCTTAGTAAT | 9742 |
| gb:MT039888 | Organism:Severe | ATAACAATTGCTTATATCATTTGTATTTCCACAAAGCATTTCTATTGGTTCCTTAGTAAT | 9742 |
| gb:LC522972 | Organism:Severe | ATAACAATTGCTTATATCATTTGTATTTCCACAAAGCATTTCTATTGGTTCCTTAGTAAT | 9739 |
| gb:MT027063 | Organism:Severe | ATAACAATTGCTTATATCATTTGTATTTCCACAAAGCATTTCTATTGGTTCCTTAGTAAT | 9742 |
| gb:MT027062 | Organism:Severe | ATAACAATTGCTTATATCATTTGTATTTCCACAAAGCATTTCTATTGGTTCCTTAGTAAT | 9742 |
| gb:MT019529 | Organism:Severe | ATAACAATTGCTTATATCATTTGTATTTCCACAAAGCATTTCTATTGGTTCCTTAGTAAT | 9742 |
| gb:MN996529 | Organism:Severe | ATAACAATTGCTTATATCATTTGTATTTCCACAAAGCATTTCTATTGGTTCCTTAGTAAT | 9730 |
| gb:MN996531 | Organism:Severe | ATAACAATTGCTTATATCATTTGTATTTCCACAAAGCATTTCTATTGGTTCCTTAGTAAT | 9729 |
| gb:MT066176 | Organism:Severe | ATAACAATTGCTTATATCATTTGTATTTCCACAAAGCATTTCTATTGGTTCCTTAGTAAT | 9742 |
| gb:MT027064 | Organism:Severe | ATAACAATTGCTTATATCATTTGTATTTCCACAAAGCATTTCTATTGGTTCCTTAGTAAT | 9742 |
| gb:MN994468 | Organism:Severe | ATAACAATTGCTTATATCATTTGTATTTCCACAAAGCATTTCTATTGGTTCCTTAGTAAT | 9742 |
| gb:MT072688 | Organism:Severe | ATAACAATTGCTTATATCATTTGTATTTCCACAAAGCATTTCTATTGGTTCCTTAGTAAT | 9727 |
| gb:MN996527 | Organism:Severe | ATAACAATTGCTTATATCATTTGTATTTCCACAAAGCATTTCTATTGGTTCCTTAGTAAT | 9709 |
| gb:MT093631 | Organism:Severe | ATAACAATTGCTTATATCATTTGTATTTCCACAAAGCATTTCTATTGGTTCCTTAGTAAT | 9780 |
| gb:MT106053 | Organism:Severe | ATAACAATTGCTTATATCATTTGTATTTCCACAAAGCATTTCTATTGGTTCCTTAGTAAT | 9742 |
| gb:MT019533 | Organism:Severe | ATAACAATTGCTTATATCATTTGTATTTCCACAAAGCATTTCTATTGGTTCCTTAGTAAT | 9742 |
| gb:MT019531 | Organism:Severe | ATAACAATTGCTTATATCATTTGTATTTCCACAAAGCATTTCTATTGGTTCCTTAGTAAT | 9742 |
| gb:MN996528 | Organism:Severe | ATAACAATTGCTTATATCATTTGTATTTCCACAAAGCATTTCTATTGGTTCCTTAGTAAT | 9742 |
| gb:MN996530 | Organism:Severe | ATAACAATTGCTTATATCATTTGTATTTCCACAAAGCATTTCTATTGGTTCCTTAGTAAT | 9728 |
| gb:MN908947 | Organism:Severe | ATAACAATTGCTTATATCATTTGTATTTCCACAAAGCATTTCTATTGGTTCCTTAGTAAT | 9742 |
| gb:MT019532 | Organism:Severe | ATAACAATTGCTTATATCATTTGTATTTCCACAAAGCATTTCTATTGGTTCCTTAGTAAT | 9742 |

\*\*\*\*\*

|             |                 |                                                              |      |
|-------------|-----------------|--------------------------------------------------------------|------|
| gb:MT020781 | Organism:Severe | TACCTAAAGAGACGTGTAGTCTTTAATGGTGTTTCCTTTAGTACTTTTGAAGAAGCTGCG | 9790 |
| gb:MT007544 | Organism:Severe | TACCTAAAGAGACGTGTAGTCTTTAATGGTGTTTCCTTTAGTACTTTTGAAGAAGCTGCG | 9802 |
| gb:MN994467 | Organism:Severe | TACCTAAAGAGACGTGTAGTCTTTAATGGTGTTTCCTTTAGTACTTTTGAAGAAGCTGCG | 9802 |
| gb:MT044257 | Organism:Severe | TACCTAAAGAGACGTGTAGTCTTTAATGGTGTTTCCTTTAGTACTTTTGAAGAAGCTGCG | 9802 |
| gb:MT106054 | Organism:Severe | TACCTAAAGAGACGTGTAGTCTTTAATGGTGTTTCCTTTAGTACTTTTGAAGAAGCTGCG | 9802 |
| gb:MT049951 | Organism:Severe | TACCTAAAGAGACGTGTAGTCTTTAATGGTGTTTCCTTTAGTACTTTTGAAGAAGCTGCG | 9802 |
| gb:MN975262 | Organism:Severe | TACCTAAAGAGACGTGTAGTCTTTAATGGTGTTTCCTTTAGTACTTTTGAAGAAGCTGCG | 9802 |
| gb:MT106052 | Organism:Severe | TACCTAAAGAGACGTGTAGTCTTTAATGGTGTTTCCTTTAGTACTTTTGAAGAAGCTGCG | 9802 |
| gb:LC522975 | Organism:Severe | TACCTAAAGAGACGTGTAGTCTTTAATGGTGTTTCCTTTAGTACTTTTGAAGAAGCTGCG | 9799 |
| gb:LC522973 | Organism:Severe | TACCTAAAGAGACGTGTAGTCTTTAATGGTGTTTCCTTTAGTACTTTTGAAGAAGCTGCG | 9799 |
| gb:LC522974 | Organism:Severe | TACCTAAAGAGACGTGTAGTCTTTAATGGTGTTTCCTTTAGTACTTTTGAAGAAGCTGCG | 9799 |
| gb:MN985325 | Organism:Severe | TACCTAAAGAGACGTGTAGTCTTTAATGGTGTTTCCTTTAGTACTTTTGAAGAAGCTGCG | 9802 |
| gb:MT020881 | Organism:Severe | TACCTAAAGAGACGTGTAGTCTTTAATGGTGTTTCCTTTAGTACTTTTGAAGAAGCTGCG | 9802 |
| gb:MT020880 | Organism:Severe | TACCTAAAGAGACGTGTAGTCTTTAATGGTGTTTCCTTTAGTACTTTTGAAGAAGCTGCG | 9802 |
| gb:MT066175 | Organism:Severe | TACCTAAAGAGACGTGTAGTCTTTAATGGTGTTTCCTTTAGTACTTTTGAAGAAGCTGCG | 9802 |
| gb:MN997409 | Organism:Severe | TACCTAAAGAGACGTGTAGTCTTTAATGGTGTTTCCTTTAGTACTTTTGAAGAAGCTGCG | 9802 |
| gb:MN938384 | Organism:Severe | TACCTAAAGAGACGTGTAGTCTTTAATGGTGTTTCCTTTAGTACTTTTGAAGAAGCTGCG | 9770 |
| gb:MT044258 | Organism:Severe | TACCTAAAGAGACGTGTAGTCTTTAATGGTGTTTCCTTTAGTACTTTTGAAGAAGCTGCG | 9778 |
| gb:MT039890 | Organism:Severe | TACCTAAAGAGACGTGTAGTCTTTAATGGTGTTTCCTTTAGTACTTTTGAAGAAGCTGCG | 9802 |
| gb:MN988713 | Organism:Severe | TACCTAAAGAGACGTGTAGTCTTTAATGGTGTTTCCTTTAGTACTTTTGAAGAAGCTGCG | 9802 |
| gb:LC521925 | Organism:Severe | TACCTAAAGAGACGTGTAGTCTTTAATGGTGTTTCCTTTAGTACTTTTGAAGAAGCTGCG | 9775 |
| gb:MT093571 | Organism:Severe | TACCTAAAGAGACGTGTAGTCTTTAATGGTGTTTCCTTTAGTACTTTTGAAGAAGCTGCG | 9802 |
| gb:MT039887 | Organism:Severe | TACCTAAAGAGACGTGTAGTCTTTAATGGTGTTTCCTTTAGTACTTTTGAAGAAGCTGCG | 9802 |
| gb:MT019530 | Organism:Severe | TACCTAAAGAGACGTGTAGTCTTTAATGGTGTTTCCTTTAGTACTTTTGAAGAAGCTGCG | 9802 |
| gb:MT039888 | Organism:Severe | TACCTAAAGAGACGTGTAGTCTTTAATGGTGTTTCCTTTAGTACTTTTGAAGAAGCTGCG | 9802 |
| gb:LC522972 | Organism:Severe | TACCTAAAGAGACGTGTAGTCTTTAATGGTGTTTCCTTTAGTACTTTTGAAGAAGCTGCG | 9799 |
| gb:MT027063 | Organism:Severe | TACCTAAAGAGACGTGTAGTCTTTAATGGTGTTTCCTTTAGTACTTTTGAAGAAGCTGCG | 9802 |
| gb:MT027062 | Organism:Severe | TACCTAAAGAGACGTGTAGTCTTTAATGGTGTTTCCTTTAGTACTTTTGAAGAAGCTGCG | 9802 |
| gb:MT019529 | Organism:Severe | TACCTAAAGAGACGTGTAGTCTTTAATGGTGTTTCCTTTAGTACTTTTGAAGAAGCTGCG | 9802 |
| gb:MN996529 | Organism:Severe | TACCTAAAGAGACGTGTAGTCTTTAATGGTGTTTCCTTTAGTACTTTTGAAGAAGCTGCG | 9790 |
| gb:MN996531 | Organism:Severe | TACCTAAAGAGACGTGTAGTCTTTAATGGTGTTTCCTTTAGTACTTTTGAAGAAGCTGCG | 9789 |
| gb:MT066176 | Organism:Severe | TACCTAAAGAGACGTGTAGTCTTTAATGGTGTTTCCTTTAGTACTTTTGAAGAAGCTGCG | 9802 |
| gb:MT027064 | Organism:Severe | TACCTAAAGAGACGTGTAGTCTTTAATGGTGTTTCCTTTAGTACTTTTGAAGAAGCTGCG | 9802 |
| gb:MN994468 | Organism:Severe | TACCTAAAGAGACGTGTAGTCTTTAATGGTGTTTCCTTTAGTACTTTTGAAGAAGCTGCG | 9802 |
| gb:MT072688 | Organism:Severe | TACCTAAAGAGACGTGTAGTCTTTAATGGTGTTTCCTTTAGTACTTTTGAAGAAGCTGCG | 9787 |
| gb:MN996527 | Organism:Severe | TACCTAAAGAGACGTGTAGTCTTTAATGGTGTTTCCTTTAGTACTTTTGAAGAAGCTGCG | 9769 |
| gb:MT093631 | Organism:Severe | TACCTAAAGAGACGTGTAGTCTTTAATGGTGTTTCCTTTAGTACTTTTGAAGAAGCTGCG | 9840 |
| gb:MT106053 | Organism:Severe | TACCTAAAGAGACGTGTAGTCTTTAATGGTGTTTCCTTTAGTACTTTTGAAGAAGCTGCG | 9802 |

|             |                 |                                                            |      |
|-------------|-----------------|------------------------------------------------------------|------|
| gb:MT019533 | Organism:Severe | TACCTAAAGACGTGTAGTCTTTAATGGTGTTTCCTTTAGTACTTTTGAAGAAGCTGCG | 9802 |
| gb:MT019531 | Organism:Severe | TACCTAAAGACGTGTAGTCTTTAATGGTGTTTCCTTTAGTACTTTTGAAGAAGCTGCG | 9802 |
| gb:MN996528 | Organism:Severe | TACCTAAAGACGTGTAGTCTTTAATGGTGTTTCCTTTAGTACTTTTGAAGAAGCTGCG | 9802 |
| gb:MN996530 | Organism:Severe | TACCTAAAGACGTGTAGTCTTTAATGGTGTTTCCTTTAGTACTTTTGAAGAAGCTGCG | 9788 |
| gb:MN908947 | Organism:Severe | TACCTAAAGACGTGTAGTCTTTAATGGTGTTTCCTTTAGTACTTTTGAAGAAGCTGCG | 9802 |
| gb:MT019532 | Organism:Severe | TACCTAAAGACGTGTAGTCTTTAATGGTGTTTCCTTTAGTACTTTTGAAGAAGCTGCG | 9802 |

\*\*\*\*\*

|             |                 |                                                              |      |
|-------------|-----------------|--------------------------------------------------------------|------|
| gb:MT020781 | Organism:Severe | CTGTGCACCTTTTTGTTAAATAAAGAAATGTATCTAAAGTTGCGTAGTGATGTGCTATTA | 9850 |
| gb:MT007544 | Organism:Severe | CTGTGCACCTTTTTGTTAAATAAAGAAATGTATCTAAAGTTGCGTAGTGATGTGCTATTA | 9862 |
| gb:MN994467 | Organism:Severe | CTGTGCACCTTTTTGTTAAATAAAGAAATGTATCTAAAGTTGCGTAGTGATGTGCTATTA | 9862 |
| gb:MT044257 | Organism:Severe | CTGTGCACCTTTTTGTTAAATAAAGAAATGTATCTAAAGTTGCGTAGTGATGTGCTATTA | 9862 |
| gb:MT106054 | Organism:Severe | CTGTGCACCTTTTTGTTAAATAAAGAAATGTATCTAAAGTTGCGTAGTGATGTGCTATTA | 9862 |
| gb:MT049951 | Organism:Severe | CTGTGCACCTTTTTGTTAAATAAAGAAATGTATCTAAAGTTGCGTAGTGATGTGCTATTA | 9862 |
| gb:MN975262 | Organism:Severe | CTGTGCACCTTTTTGTTAAATAAAGAAATGTATCTAAAGTTGCGTAGTGATGTGCTATTA | 9862 |
| gb:MT106052 | Organism:Severe | CTGTGCACCTTTTTGTTAAATAAAGAAATGTATCTAAAGTTGCGTAGTGATGTGCTATTA | 9862 |
| gb:LC522975 | Organism:Severe | CTGTGCACCTTTTTGTTAAATAAAGAAATGTATCTAAAGTTGCGTAGTGATGTGCTATTA | 9859 |
| gb:LC522973 | Organism:Severe | CTGTGCACCTTTTTGTTAAATAAAGAAATGTATCTAAAGTTGCGTAGTGATGTGCTATTA | 9859 |
| gb:LC522974 | Organism:Severe | CTGTGCACCTTTTTGTTAAATAAAGAAATGTATCTAAAGTTGCGTAGTGATGTGCTATTA | 9859 |
| gb:MN985325 | Organism:Severe | CTGTGCACCTTTTTGTTAAATAAAGAAATGTATCTAAAGTTGCGTAGTGATGTGCTATTA | 9862 |
| gb:MT020881 | Organism:Severe | CTGTGCACCTTTTTGTTAAATAAAGAAATGTATCTAAAGTTGCGTAGTGATGTGCTATTA | 9862 |
| gb:MT020880 | Organism:Severe | CTGTGCACCTTTTTGTTAAATAAAGAAATGTATCTAAAGTTGCGTAGTGATGTGCTATTA | 9862 |
| gb:MT066175 | Organism:Severe | CTGTGCACCTTTTTGTTAAATAAAGAAATGTATCTAAAGTTGCGTAGTGATGTGCTATTA | 9862 |
| gb:MN997409 | Organism:Severe | CTGTGCACCTTTTTGTTAAATAAAGAAATGTATCTAAAGTTGCGTAGTGATGTGCTATTA | 9862 |
| gb:MN938384 | Organism:Severe | CTGTGCACCTTTTTGTTAAATAAAGAAATGTATCTAAAGTTGCGTAGTGATGTGCTATTA | 9830 |
| gb:MT044258 | Organism:Severe | CTGTGCACCTTTTTGTTAAATAAAGAAATGTATCTAAAGTTGCGTAGTGATGTGCTATTA | 9838 |
| gb:MT039890 | Organism:Severe | CTGTGCACCTTTTTGTTAAATAAAGAAATGTATCTAAAGTTGCGTAGTGATGTGCTATTA | 9862 |
| gb:MN988713 | Organism:Severe | CTGTGCACCTTTTTGTTAAATAAAGAAATGTATCTAAAGTTGCGTAGTGATGTGCTATTA | 9862 |
| gb:LC521925 | Organism:Severe | CTGTGCACCTTTTTGTTAAATAAAGAAATGTATCTAAAGTTGCGTAGTGATGTGCTATTA | 9835 |
| gb:MT093571 | Organism:Severe | CTGTGCACCTTTTTGTTAAATAAAGAAATGTATCTAAAGTTGCGTAGTGATGTGCTATTA | 9862 |
| gb:MT039887 | Organism:Severe | CTGTGCACCTTTTTGTTAAATAAAGAAATGTATCTAAAGTTGCGTAGTGATGTGCTATTA | 9862 |
| gb:MT019530 | Organism:Severe | CTGTGCACCTTTTTGTTAAATAAAGAAATGTATCTAAAGTTGCGTAGTGATGTGCTATTA | 9862 |
| gb:MT039888 | Organism:Severe | CTGTGCACCTTTTTGTTAAATAAAGAAATGTATCTAAAGTTGCGTAGTGATGTGCTATTA | 9862 |
| gb:LC522972 | Organism:Severe | CTGTGCACCTTTTTGTTAAATAAAGAAATGTATCTAAAGTTGCGTAGTGATGTGCTATTA | 9859 |
| gb:MT027063 | Organism:Severe | CTGTGCACCTTTTTGTTAAATAAAGAAATGTATCTAAAGTTGCGTAGTGATGTGCTATTA | 9862 |
| gb:MT027062 | Organism:Severe | CTGTGCACCTTTTTGTTAAATAAAGAAATGTATCTAAAGTTGCGTAGTGATGTGCTATTA | 9862 |
| gb:MT019529 | Organism:Severe | CTGTGCACCTTTTTGTTAAATAAAGAAATGTATCTAAAGTTGCGTAGTGATGTGCTATTA | 9862 |
| gb:MN996529 | Organism:Severe | CTGTGCACCTTTTTGTTAAATAAAGAAATGTATCTAAAGTTGCGTAGTGATGTGCTATTA | 9850 |
| gb:MN996531 | Organism:Severe | CTGTGCACCTTTTTGTTAAATAAAGAAATGTATCTAAAGTTGCGTAGTGATGTGCTATTA | 9849 |
| gb:MT066176 | Organism:Severe | CTGTGCACCTTTTTGTTAAATAAAGAAATGTATCTAAAGTTGCGTAGTGATGTGCTATTA | 9862 |
| gb:MT027064 | Organism:Severe | CTGTGCACCTTTTTGTTAAATAAAGAAATGTATCTAAAGTTGCGTAGTGATGTGCTATTA | 9862 |
| gb:MN994468 | Organism:Severe | CTGTGCACCTTTTTGTTAAATAAAGAAATGTATCTAAAGTTGCGTAGTGATGTGCTATTA | 9862 |
| gb:MT072688 | Organism:Severe | CTGTGCACCTTTTTGTTAAATAAAGAAATGTATCTAAAGTTGCGTAGTGATGTGCTATTA | 9847 |
| gb:MN996527 | Organism:Severe | CTGTGCACCTTTTTGTTAAATAAAGAAATGTATCTAAAGTTGCGTAGTGATGTGCTATTA | 9829 |
| gb:MT093631 | Organism:Severe | CTGTGCACCTTTTTGTTAAATAAAGAAATGTATCTAAAGTTGCGTAGTGATGTGCTATTA | 9900 |
| gb:MT106053 | Organism:Severe | CTGTGCACCTTTTTGTTAAATAAAGAAATGTATCTAAAGTTGCGTAGTGATGTGCTATTA | 9862 |
| gb:MT019533 | Organism:Severe | CTGTGCACCTTTTTGTTAAATAAAGAAATGTATCTAAAGTTGCGTAGTGATGTGCTATTA | 9862 |
| gb:MT019531 | Organism:Severe | CTGTGCACCTTTTTGTTAAATAAAGAAATGTATCTAAAGTTGCGTAGTGATGTGCTATTA | 9862 |
| gb:MN996528 | Organism:Severe | CTGTGCACCTTTTTGTTAAATAAAGAAATGTATCTAAAGTTGCGTAGTGATGTGCTATTA | 9862 |
| gb:MN996530 | Organism:Severe | CTGTGCACCTTTTTGTTAAATAAAGAAATGTATCTAAAGTTGCGTAGTGATGTGCTATTA | 9848 |
| gb:MN908947 | Organism:Severe | CTGTGCACCTTTTTGTTAAATAAAGAAATGTATCTAAAGTTGCGTAGTGATGTGCTATTA | 9862 |
| gb:MT019532 | Organism:Severe | CTGTGCACCTTTTTGTTAAATAAAGAAATGTATCTAAAGTTGCGTAGTGATGTGCTATTA | 9862 |

\*\*\*\*\*

|             |                 |                                                              |      |
|-------------|-----------------|--------------------------------------------------------------|------|
| gb:MT020781 | Organism:Severe | CCTCTTACGCAATATAATAGATACTTAGCTCTTTATAATAAGTACAAGTATTTTAGTGGA | 9910 |
| gb:MT007544 | Organism:Severe | CCTCTTACGCAATATAATAGATACTTAGCTCTTTATAATAAGTACAAGTATTTTAGTGGA | 9922 |
| gb:MN994467 | Organism:Severe | CCTCTTACGCAATATAATAGATACTTAGCTCTTTATAATAAGTACAAGTATTTTAGTGGA | 9922 |
| gb:MT044257 | Organism:Severe | CCTCTTACGCAATATAATAGATACTTAGCTCTTTATAATAAGTACAAGTATTTTAGTGGA | 9922 |
| gb:MT106054 | Organism:Severe | CCTCTTACGCAATATAATAGATACTTAGCTCTTTATAATAAGTACAAGTATTTTAGTGGA | 9922 |
| gb:MT049951 | Organism:Severe | CCTCTTACGCAATATAATAGATACTTAGCTCTTTATAATAAGTACAAGTATTTTAGTGGA | 9922 |
| gb:MN975262 | Organism:Severe | CCTCTTACGCAATATAATAGATACTTAGCTCTTTATAATAAGTACAAGTATTTTAGTGGA | 9922 |
| gb:MT106052 | Organism:Severe | CCTCTTACGCAATATAATAGATACTTAGCTCTTTATAATAAGTACAAGTATTTTAGTGGA | 9922 |
| gb:LC522975 | Organism:Severe | CCTCTTACGCAATATAATAGATACTTAGCTCTTTATAATAAGTACAAGTATTTTAGTGGA | 9919 |
| gb:LC522973 | Organism:Severe | CCTCTTACGCAATATAATAGATACTTAGCTCTTTATAATAAGTACAAGTATTTTAGTGGA | 9919 |
| gb:LC522974 | Organism:Severe | CCTCTTACGCAATATAATAGATACTTAGCTCTTTATAATAAGTACAAGTATTTTAGTGGA | 9919 |

|             |                 |                                                        |      |
|-------------|-----------------|--------------------------------------------------------|------|
| gb:MN985325 | Organism:Severe | CCTCTTACGCAATATAATAGATACTTAGCTCTTTATAATAAGTACAAGTATTTT | 9922 |
| gb:MT020881 | Organism:Severe | CCTCTTACGCAATATAATAGATACTTAGCTCTTTATAATAAGTACAAGTATTTT | 9922 |
| gb:MT020880 | Organism:Severe | CCTCTTACGCAATATAATAGATACTTAGCTCTTTATAATAAGTACAAGTATTTT | 9922 |
| gb:MT066175 | Organism:Severe | CCTCTTACGCAATATAATAGATACTTAGCTCTTTATAATAAGTACAAGTATTTT | 9922 |
| gb:MN997409 | Organism:Severe | CCTCTTACGCAATATAATAGATACTTAGCTCTTTATAATAAGTACAAGTATTTT | 9922 |
| gb:MN938384 | Organism:Severe | CCTCTTACGCAATATAATAGATACTTAGCTCTTTATAATAAGTACAAGTATTTT | 9890 |
| gb:MT044258 | Organism:Severe | CCTCTTACGCAATATAATAGATACTTAGCTCTTTATAATAAGTACAAGTATTTT | 9898 |
| gb:MT039890 | Organism:Severe | CCTCTTACGCAATATAATAGATACTTAGCTCTTTATAATAAGTACAAGTATTTT | 9922 |
| gb:MN988713 | Organism:Severe | CCTCTTACGCAATATAATAGATACTTAGCTCTTTATAATAAGTACAAGTATTTT | 9922 |
| gb:LC521925 | Organism:Severe | CCTCTTACGCAATATAATAGATACTTAGCTCTTTATAATAAGTACAAGTATTTT | 9895 |
| gb:MT093571 | Organism:Severe | CCTCTTACGCAATATAATAGATACTTAGCTCTTTATAATAAGTACAAGTATTTT | 9922 |
| gb:MT039887 | Organism:Severe | CCTCTTACGCAATATAATAGATACTTAGCTCTTTATAATAAGTACAAGTATTTT | 9922 |
| gb:MT019530 | Organism:Severe | CCTCTTACGCAATATAATAGATACTTAGCTCTTTATAATAAGTACAAGTATTTT | 9922 |
| gb:MT039888 | Organism:Severe | CCTCTTACGCAATATAATAGATACTTAGCTCTTTATAATAAGTACAAGTATTTT | 9922 |
| gb:LC522972 | Organism:Severe | CCTCTTACGCAATATAATAGATACTTAGCTCTTTATAATAAGTACAAGTATTTT | 9919 |
| gb:MT027063 | Organism:Severe | CCTCTTACGCAATATAATAGATACTTAGCTCTTTATAATAAGTACAAGTATTTT | 9922 |
| gb:MT027062 | Organism:Severe | CCTCTTACGCAATATAATAGATACTTAGCTCTTTATAATAAGTACAAGTATTTT | 9922 |
| gb:MT019529 | Organism:Severe | CCTCTTACGCAATATAATAGATACTTAGCTCTTTATAATAAGTACAAGTATTTT | 9922 |
| gb:MN996529 | Organism:Severe | CCTCTTACGCAATATAATAGATACTTAGCTCTTTATAATAAGTACAAGTATTTT | 9910 |
| gb:MN996531 | Organism:Severe | CCTCTTACGCAATATAATAGATACTTAGCTCTTTATAATAAGTACAAGTATTTT | 9909 |
| gb:MT066176 | Organism:Severe | CCTCTTACGCAATATAATAGATACTTAGCTCTTTATAATAAGTACAAGTATTTT | 9922 |
| gb:MT027064 | Organism:Severe | CCTCTTACGCAATATAATAGATACTTAGCTCTTTATAATAAGTACAAGTATTTT | 9922 |
| gb:MN994468 | Organism:Severe | CCTCTTACGCAATATAATAGATACTTAGCTCTTTATAATAAGTACAAGTATTTT | 9922 |
| gb:MT072688 | Organism:Severe | CCTCTTACGCAATATAATAGATACTTAGCTCTTTATAATAAGTACAAGTATTTT | 9907 |
| gb:MN996527 | Organism:Severe | CCTCTTACGCAATATAATAGATACTTAGCTCTTTATAATAAGTACAAGTATTTT | 9889 |
| gb:MT093631 | Organism:Severe | CCTCTTACGCAATATAATAGATACTTAGCTCTTTATAATAAGTACAAGTATTTT | 9960 |
| gb:MT106053 | Organism:Severe | CCTCTTACGCAATATAATAGATACTTAGCTCTTTATAATAAGTACAAGTATTTT | 9922 |
| gb:MT019533 | Organism:Severe | CCTCTTACGCAATATAATAGATACTTAGCTCTTTATAATAAGTACAAGTATTTT | 9922 |
| gb:MT019531 | Organism:Severe | CCTCTTACGCAATATAATAGATACTTAGCTCTTTATAATAAGTACAAGTATTTT | 9922 |
| gb:MN996528 | Organism:Severe | CCTCTTACGCAATATAATAGATACTTAGCTCTTTATAATAAGTACAAGTATTTT | 9922 |
| gb:MN996530 | Organism:Severe | CCTCTTACGCAATATAATAGATACTTAGCTCTTTATAATAAGTACAAGTATTTT | 9908 |
| gb:MN908947 | Organism:Severe | CCTCTTACGCAATATAATAGATACTTAGCTCTTTATAATAAGTACAAGTATTTT | 9922 |
| gb:MT019532 | Organism:Severe | CCTCTTACGCAATATAATAGATACTTAGCTCTTTATAATAAGTACAAGTATTTT | 9922 |

\*\*\*\*\*

|             |                 |                                                               |      |
|-------------|-----------------|---------------------------------------------------------------|------|
| gb:MT020781 | Organism:Severe | GCAATGGATACAACCTAGCTACAGAGAAGCTGCTTGTGTGCATCTCGCAAAGGCTCTCAAT | 9970 |
| gb:MT007544 | Organism:Severe | GCAATGGATACAACCTAGCTACAGAGAAGCTGCTTGTGTGCATCTCGCAAAGGCTCTCAAT | 9982 |
| gb:MN994467 | Organism:Severe | GCAATGGATACAACCTAGCTACAGAGAAGCTGCTTGTGTGCATCTCGCAAAGGCTCTCAAT | 9982 |
| gb:MT044257 | Organism:Severe | GCAATGGATACAACCTAGCTACAGAGAAGCTGCTTGTGTGCATCTCGCAAAGGCTCTCAAT | 9982 |
| gb:MT106054 | Organism:Severe | GCAATGGATACAACCTAGCTACAGAGAAGCTGCTTGTGTGCATCTCGCAAAGGCTCTCAAT | 9982 |
| gb:MT049951 | Organism:Severe | GCAATGGATACAACCTAGCTACAGAGAAGCTGCTTGTGTGCATCTCGCAAAGGCTCTCAAT | 9982 |
| gb:MN975262 | Organism:Severe | GCAATGGATACAACCTAGCTACAGAGAAGCTGCTTGTGTGCATCTCGCAAAGGCTCTCAAT | 9982 |
| gb:MT106052 | Organism:Severe | GCAATGGATACAACCTAGCTACAGAGAAGCTGCTTGTGTGCATCTCGCAAAGGCTCTCAAT | 9982 |
| gb:LC522975 | Organism:Severe | GCAATGGATACAACCTAGCTACAGAGAAGCTGCTTGTGTGCATCTCGCAAAGGCTCTCAAT | 9979 |
| gb:LC522973 | Organism:Severe | GCAATGGATACAACCTAGCTACAGAGAAGCTGCTTGTGTGCATCTCGCAAAGGCTCTCAAT | 9979 |
| gb:LC522974 | Organism:Severe | GCAATGGATACAACCTAGCTACAGAGAAGCTGCTTGTGTGCATCTCGCAAAGGCTCTCAAT | 9979 |
| gb:MN985325 | Organism:Severe | GCAATGGATACAACCTAGCTACAGAGAAGCTGCTTGTGTGCATCTCGCAAAGGCTCTCAAT | 9982 |
| gb:MT020881 | Organism:Severe | GCAATGGATACAACCTAGCTACAGAGAAGCTGCTTGTGTGCATCTCGCAAAGGCTCTCAAT | 9982 |
| gb:MT020880 | Organism:Severe | GCAATGGATACAACCTAGCTACAGAGAAGCTGCTTGTGTGCATCTCGCAAAGGCTCTCAAT | 9982 |
| gb:MT066175 | Organism:Severe | GCAATGGATACAACCTAGCTACAGAGAAGCTGCTTGTGTGCATCTCGCAAAGGCTCTCAAT | 9982 |
| gb:MN997409 | Organism:Severe | GCAATGGATACAACCTAGCTACAGAGAAGCTGCTTGTGTGCATCTCGCAAAGGCTCTCAAT | 9982 |
| gb:MN938384 | Organism:Severe | GCAATGGATACAACCTAGCTACAGAGAAGCTGCTTGTGTGCATCTCGCAAAGGCTCTCAAT | 9950 |
| gb:MT044258 | Organism:Severe | GCAATGGATACAACCTAGCTACAGAGAAGCTGCTTGTGTGCATCTCGCAAAGGCTCTCAAT | 9958 |
| gb:MT039890 | Organism:Severe | GCAATGGATACAACCTAGCTACAGAGAAGCTGCTTGTGTGCATCTCGCAAAGGCTCTCAAT | 9982 |
| gb:MN988713 | Organism:Severe | GCAATGGATACAACCTAGCTACAGAGAAGCTGCTTGTGTGCATCTCGCAAAGGCTCTCAAT | 9982 |
| gb:LC521925 | Organism:Severe | GCAATGGATACAACCTAGCTACAGAGAAGCTGCTTGTGTGCATCTCGCAAAGGCTCTCAAT | 9955 |
| gb:MT093571 | Organism:Severe | GCAATGGATACAACCTAGCTACAGAGAAGCTGCTTGTGTGCATCTCGCAAAGGCTCTCAAT | 9982 |
| gb:MT039887 | Organism:Severe | GCAATGGATACAACCTAGCTACAGAGAAGCTGCTTGTGTGCATCTCGCAAAGGCTCTCAAT | 9982 |
| gb:MT019530 | Organism:Severe | GCAATGGATACAACCTAGCTACAGAGAAGCTGCTTGTGTGCATCTCGCAAAGGCTCTCAAT | 9982 |
| gb:MT039888 | Organism:Severe | GCAATGGATACAACCTAGCTACAGAGAAGCTGCTTGTGTGCATCTCGCAAAGGCTCTCAAT | 9982 |
| gb:LC522972 | Organism:Severe | GCAATGGATACAACCTAGCTACAGAGAAGCTGCTTGTGTGCATCTCGCAAAGGCTCTCAAT | 9979 |
| gb:MT027063 | Organism:Severe | GCAATGGATACAACCTAGCTACAGAGAAGCTGCTTGTGTGCATCTCGCAAAGGCTCTCAAT | 9982 |
| gb:MT027062 | Organism:Severe | GCAATGGATACAACCTAGCTACAGAGAAGCTGCTTGTGTGCATCTCGCAAAGGCTCTCAAT | 9982 |
| gb:MT019529 | Organism:Severe | GCAATGGATACAACCTAGCTACAGAGAAGCTGCTTGTGTGCATCTCGCAAAGGCTCTCAAT | 9982 |
| gb:MN996529 | Organism:Severe | GCAATGGATACAACCTAGCTACAGAGAAGCTGCTTGTGTGCATCTCGCAAAGGCTCTCAAT | 9970 |

|             |                 |                                                                |       |
|-------------|-----------------|----------------------------------------------------------------|-------|
| gb:MN996531 | Organism:Severe | GCAATGGATAACAAC TAGCTACAGAGAAGCTGCTTGTGTGCATCTCGCAAAGGCTCTCAAT | 9969  |
| gb:MT066176 | Organism:Severe | GCAATGGATAACAAC TAGCTACAGAGAAGCTGCTTGTGTGCATCTCGCAAAGGCTCTCAAT | 9982  |
| gb:MT027064 | Organism:Severe | GCAATGGATAACAAC TAGCTACAGAGAAGCTGCTTGTGTGCATCTCGCAAAGGCTCTCAAT | 9982  |
| gb:MN994468 | Organism:Severe | GCAATGGATAACAAC TAGCTACAGAGAAGCTGCTTGTGTGCATCTCGCAAAGGCTCTCAAT | 9982  |
| gb:MT072688 | Organism:Severe | GCAATGGATAACAAC TAGCTACAGAGAAGCTGCTTGTGTGCATCTCGCAAAGGCTCTCAAT | 9967  |
| gb:MN996527 | Organism:Severe | GCAATGGATAACAAC TAGCTACAGAGAAGCTGCTTGTGTGCATCTCGCAAAGGCTCTCAAT | 9949  |
| gb:MT093631 | Organism:Severe | GCAATGGATAACAAC TAGCTACAGAGAAGCTGCTTGTGTGCATCTCGCAAAGGCTCTCAAT | 10020 |
| gb:MT106053 | Organism:Severe | GCAATGGATAACAAC TAGCTACAGAGAAGCTGCTTGTGTGCATCTCGCAAAGGCTCTCAAT | 9982  |
| gb:MT019533 | Organism:Severe | GCAATGGATAACAAC TAGCTACAGAGAAGCTGCTTGTGTGCATCTCGCAAAGGCTCTCAAT | 9982  |
| gb:MT019531 | Organism:Severe | GCAATGGATAACAAC TAGCTACAGAGAAGCTGCTTGTGTGCATCTCGCAAAGGCTCTCAAT | 9982  |
| gb:MN996528 | Organism:Severe | GCAATGGATAACAAC TAGCTACAGAGAAGCTGCTTGTGTGCATCTCGCAAAGGCTCTCAAT | 9982  |
| gb:MN996530 | Organism:Severe | GCAATGGATAACAAC TAGCTACAGAGAAGCTGCTTGTGTGCATCTCGCAAAGGCTCTCAAT | 9968  |
| gb:MN908947 | Organism:Severe | GCAATGGATAACAAC TAGCTACAGAGAAGCTGCTTGTGTGCATCTCGCAAAGGCTCTCAAT | 9982  |
| gb:MT019532 | Organism:Severe | GCAATGGATAACAAC TAGCTACAGAGAAGCTGCTTGTGTGCATCTCGCAAAGGCTCTCAAT | 9982  |

\*\*\*\*\*

|             |                 |                                                              |       |
|-------------|-----------------|--------------------------------------------------------------|-------|
| gb:MT020781 | Organism:Severe | GACTTCAGTAACTCAGTTCTGATGTTCTTTACCAACCACCACAAAACCTCTATCACCTCA | 10030 |
| gb:MT007544 | Organism:Severe | GACTTCAGTAACTCAGTTCTGATGTTCTTTACCAACCACCACAAAACCTCTATCACCTCA | 10042 |
| gb:MN994467 | Organism:Severe | GACTTCAGTAACTCAGTTCTGATGTTCTTTACCAACCACCACAAAACCTCTATCACCTCA | 10042 |
| gb:MT044257 | Organism:Severe | GACTTCAGTAACTCAGTTCTGATGTTCTTTACCAACCACCACAAAACCTCTATCACCTCA | 10042 |
| gb:MT106054 | Organism:Severe | GACTTCAGTAACTCAGTTCTGATGTTCTTTACCAACCACCACAAAACCTCTATCACCTCA | 10042 |
| gb:MT049951 | Organism:Severe | GACTTCAGTAACTCAGTTCTGATGTTCTTTACCAACCACCACAAAACCTCTATCACCTCA | 10042 |
| gb:MN975262 | Organism:Severe | GACTTCAGTAACTCAGTTCTGATGTTCTTTACCAACCACCACAAAACCTCTATCACCTCA | 10042 |
| gb:MT106052 | Organism:Severe | GACTTCAGTAACTCAGTTCTGATGTTCTTTACCAACCACCACAAAACCTCTATCACCTCA | 10042 |
| gb:LC522975 | Organism:Severe | GACTTCAGTAACTCAGTTCTGATGTTCTTTACCAACCACCACAAAACCTCTATCACCTCA | 10039 |
| gb:LC522973 | Organism:Severe | GACTTCAGTAACTCAGTTCTGATGTTCTTTACCAACCACCACAAAACCTCTATCACCTCA | 10039 |
| gb:LC522974 | Organism:Severe | GACTTCAGTAACTCAGTTCTGATGTTCTTTACCAACCACCACAAAACCTCTATCACCTCA | 10039 |
| gb:MN985325 | Organism:Severe | GACTTCAGTAACTCAGTTCTGATGTTCTTTACCAACCACCACAAAACCTCTATCACCTCA | 10042 |
| gb:MT020881 | Organism:Severe | GACTTCAGTAACTCAGTTCTGATGTTCTTTACCAACCACCACAAAACCTCTATCACCTCA | 10042 |
| gb:MT020880 | Organism:Severe | GACTTCAGTAACTCAGTTCTGATGTTCTTTACCAACCACCACAAAACCTCTATCACCTCA | 10042 |
| gb:MT066175 | Organism:Severe | GACTTCAGTAACTCAGTTCTGATGTTCTTTACCAACCACCACAAAACCTCTATCACCTCA | 10042 |
| gb:MN997409 | Organism:Severe | GACTTCAGTAACTCAGTTCTGATGTTCTTTACCAACCACCACAAAACCTCTATCACCTCA | 10042 |
| gb:MN938384 | Organism:Severe | GACTTCAGTAACTCAGTTCTGATGTTCTTTACCAACCACCACAAAACCTCTATCACCTCA | 10010 |
| gb:MT044258 | Organism:Severe | GACTTCAGTAACTCAGTTCTGATGTTCTTTACCAACCACCACAAAACCTCTATCACCTCA | 10018 |
| gb:MT039890 | Organism:Severe | GACTTCAGTAACTCAGTTCTGATGTTCTTTACCAACCACCACAAAACCTCTATCACCTCA | 10042 |
| gb:MN988713 | Organism:Severe | GACTTCAGTAACTCAGTTCTGATGTTCTTTACCAACCACCACAAAACCTCTATCACCTCA | 10042 |
| gb:LC521925 | Organism:Severe | GACTTCAGTAACTCAGTTCTGATGTTCTTTACCAACCACCACAAAACCTCTATCACCTCA | 10015 |
| gb:MT093571 | Organism:Severe | GACTTCAGTAACTCAGTTCTGATGTTCTTTACCAACCACCACAAAACCTCTATCACCTCA | 10042 |
| gb:MT039887 | Organism:Severe | GACTTCAGTAACTCAGTTCTGATGTTCTTTACCAACCACCACAAAACCTCTATCACCTCA | 10042 |
| gb:MT019530 | Organism:Severe | GACTTCAGTAACTCAGTTCTGATGTTCTTTACCAACCACCACAAAACCTCTATCACCTCA | 10042 |
| gb:MT039888 | Organism:Severe | GACTTCAGTAACTCAGTTCTGATGTTCTTTACCAACCACCACAAAACCTCTATCACCTCA | 10042 |
| gb:LC522972 | Organism:Severe | GACTTCAGTAACTCAGTTCTGATGTTCTTTACCAACCACCACAAAACCTCTATCACCTCA | 10039 |
| gb:MT027063 | Organism:Severe | GACTTCAGTAACTCAGTTCTGATGTTCTTTACCAACCACCACAAAACCTCTATCACCTCA | 10042 |
| gb:MT027062 | Organism:Severe | GACTTCAGTAACTCAGTTCTGATGTTCTTTACCAACCACCACAAAACCTCTATCACCTCA | 10042 |
| gb:MT019529 | Organism:Severe | GACTTCAGTAACTCAGTTCTGATGTTCTTTACCAACCACCACAAAACCTCTATCACCTCA | 10042 |
| gb:MN996529 | Organism:Severe | GACTTCAGTAACTCAGTTCTGATGTTCTTTACCAACCACCACAAAACCTCTATCACCTCA | 10030 |
| gb:MN996531 | Organism:Severe | GACTTCAGTAACTCAGTTCTGATGTTCTTTACCAACCACCACAAAACCTCTATCACCTCA | 10029 |
| gb:MT066176 | Organism:Severe | GACTTCAGTAACTCAGTTCTGATGTTCTTTACCAACCACCACAAAACCTCTATCACCTCA | 10042 |
| gb:MT027064 | Organism:Severe | GACTTCAGTAACTCAGTTCTGATGTTCTTTACCAACCACCACAAAACCTCTATCACCTCA | 10042 |
| gb:MN994468 | Organism:Severe | GACTTCAGTAACTCAGTTCTGATGTTCTTTACCAACCACCACAAAACCTCTATCACCTCA | 10042 |
| gb:MT072688 | Organism:Severe | GACTTCAGTAACTCAGTTCTGATGTTCTTTACCAACCACCACAAAACCTCTATCACCTCA | 10027 |
| gb:MN996527 | Organism:Severe | GACTTCAGTAACTCAGTTCTGATGTTCTTTACCAACCACCACAAAACCTCTATCACCTCA | 10009 |
| gb:MT093631 | Organism:Severe | GACTTCAGTAACTCAGTTCTGATGTTCTTTACCAACCACCACAAAACCTCTATCACCTCA | 10080 |
| gb:MT106053 | Organism:Severe | GACTTCAGTAACTCAGTTCTGATGTTCTTTACCAACCACCACAAAACCTCTATCACCTCA | 10042 |
| gb:MT019533 | Organism:Severe | GACTTCAGTAACTCAGTTCTGATGTTCTTTACCAACCACCACAAAACCTCTATCACCTCA | 10042 |
| gb:MT019531 | Organism:Severe | GACTTCAGTAACTCAGTTCTGATGTTCTTTACCAACCACCACAAAACCTCTATCACCTCA | 10042 |
| gb:MN996528 | Organism:Severe | GACTTCAGTAACTCAGTTCTGATGTTCTTTACCAACCACCACAAAACCTCTATCACCTCA | 10042 |
| gb:MN996530 | Organism:Severe | GACTTCAGTAACTCAGTTCTGATGTTCTTTACCAACCACCACAAAACCTCTATCACCTCA | 10028 |
| gb:MN908947 | Organism:Severe | GACTTCAGTAACTCAGTTCTGATGTTCTTTACCAACCACCACAAAACCTCTATCACCTCA | 10042 |
| gb:MT019532 | Organism:Severe | GACTTCAGTAACTCAGTTCTGATGTTCTTTACCAACCACCACAAAACCTCTATCACCTCA | 10042 |

\*\*\*\*\*

|             |                 |                                                              |       |
|-------------|-----------------|--------------------------------------------------------------|-------|
| gb:MT020781 | Organism:Severe | GCTGTTTTGCAGAGTGGTTTTAGAAAAATGGCATTCCCATCTGGTAAAGTTGAGGGTTGT | 10090 |
| gb:MT007544 | Organism:Severe | GCTGTTTTGCAGAGTGGTTTTAGAAAAATGGCATTCCCATCTGGTAAAGTTGAGGGTTGT | 10102 |
| gb:MN994467 | Organism:Severe | GCTGTTTTGCAGAGTGGTTTTAGAAAAATGGCATTCCCATCTGGTAAAGTTGAGGGTTGT | 10102 |





|             |                 |                                                          |       |
|-------------|-----------------|----------------------------------------------------------|-------|
| gb:MT039887 | Organism:Severe | ATGGTACAAGTAACCTTGTGGTACAACCTAACGGTCTTTGGCTTGATGACGTAGTT | 10162 |
| gb:MT019530 | Organism:Severe | ATGGTACAAGTAACCTTGTGGTACAACCTAACGGTCTTTGGCTTGATGACGTAGTT | 10162 |
| gb:MT039888 | Organism:Severe | ATGGTACAAGTAACCTTGTGGTACAACCTAACGGTCTTTGGCTTGATGACGTAGTT | 10162 |
| gb:LC522972 | Organism:Severe | ATGGTACAAGTAACCTTGTGGTACAACCTAACGGTCTTTGGCTTGATGACGTAGTT | 10159 |
| gb:MT027063 | Organism:Severe | ATGGTACAAGTAACCTTGTGGTACAACCTAACGGTCTTTGGCTTGATGACGTAGTT | 10162 |
| gb:MT027062 | Organism:Severe | ATGGTACAAGTAACCTTGTGGTACAACCTAACGGTCTTTGGCTTGATGACGTAGTT | 10162 |
| gb:MT019529 | Organism:Severe | ATGGTACAAGTAACCTTGTGGTACAACCTAACGGTCTTTGGCTTGATGACGTAGTT | 10162 |
| gb:MN996529 | Organism:Severe | ATGGTACAAGTAACCTTGTGGTACAACCTAACGGTCTTTGGCTTGATGACGTAGTT | 10150 |
| gb:MN996531 | Organism:Severe | ATGGTACAAGTAACCTTGTGGTACAACCTAACGGTCTTTGGCTTGATGACGTAGTT | 10149 |
| gb:MT066176 | Organism:Severe | ATGGTACAAGTAACCTTGTGGTACAACCTAACGGTCTTTGGCTTGATGACGTAGTT | 10162 |
| gb:MT027064 | Organism:Severe | ATGGTACAAGTAACCTTGTGGTACAACCTAACGGTCTTTGGCTTGATGACGTAGTT | 10162 |
| gb:MN994468 | Organism:Severe | ATGGTACAAGTAACCTTGTGGTACAACCTAACGGTCTTTGGCTTGATGACGTAGTT | 10162 |
| gb:MT072688 | Organism:Severe | ATGGTACAAGTAACCTTGTGGTACAACCTAACGGTCTTTGGCTTGATGACGTAGTT | 10147 |
| gb:MN996527 | Organism:Severe | ATGGTACAAGTAACCTTGTGGTACAACCTAACGGTCTTTGGCTTGATGACGTAGTT | 10129 |
| gb:MT093631 | Organism:Severe | ATGGTACAAGTAACCTTGTGGTACAACCTAACGGTCTTTGGCTTGATGACGTAGTT | 10200 |
| gb:MT106053 | Organism:Severe | ATGGTACAAGTAACCTTGTGGTACAACCTAACGGTCTTTGGCTTGATGACGTAGTT | 10162 |
| gb:MT019533 | Organism:Severe | ATGGTACAAGTAACCTTGTGGTACAACCTAACGGTCTTTGGCTTGATGACGTAGTT | 10162 |
| gb:MT019531 | Organism:Severe | ATGGTACAAGTAACCTTGTGGTACAACCTAACGGTCTTTGGCTTGATGACGTAGTT | 10162 |
| gb:MN996528 | Organism:Severe | ATGGTACAAGTAACCTTGTGGTACAACCTAACGGTCTTTGGCTTGATGACGTAGTT | 10162 |
| gb:MN996530 | Organism:Severe | ATGGTACAAGTAACCTTGTGGTACAACCTAACGGTCTTTGGCTTGATGACGTAGTT | 10148 |
| gb:MN908947 | Organism:Severe | ATGGTACAAGTAACCTTGTGGTACAACCTAACGGTCTTTGGCTTGATGACGTAGTT | 10162 |
| gb:MT019532 | Organism:Severe | ATGGTACAAGTAACCTTGTGGTACAACCTAACGGTCTTTGGCTTGATGACGTAGTT | 10162 |

\*\*\*\*\*

|             |                 |                                                              |       |
|-------------|-----------------|--------------------------------------------------------------|-------|
| gb:MT020781 | Organism:Severe | TACTGTCCAAGACATGTGATCTGCACCTCTGAAGACATGCTTAACCCTAATTATGAAGAT | 10210 |
| gb:MT007544 | Organism:Severe | TACTGTCCAAGACATGTGATCTGCACCTCTGAAGACATGCTTAACCCTAATTATGAAGAT | 10222 |
| gb:MN994467 | Organism:Severe | TACTGTCCAAGACATGTGATCTGCACCTCTGAAGACATGCTTAACCCTAATTATGAAGAT | 10222 |
| gb:MT044257 | Organism:Severe | TACTGTCCAAGACATGTGATCTGCACCTCTGAAGACATGCTTAACCCTAATTATGAAGAT | 10222 |
| gb:MT106054 | Organism:Severe | TACTGTCCAAGACATGTGATCTGCACCTCTGAAGACATGCTTAACCCTAATTATGAAGAT | 10222 |
| gb:MT049951 | Organism:Severe | TACTGTCCAAGACATGTGATCTGCACCTCTGAAGACATGCTTAACCCTAATTATGAAGAT | 10222 |
| gb:MN975262 | Organism:Severe | TACTGTCCAAGACATGTGATCTGCACCTCTGAAGACATGCTTAACCCTAATTATGAAGAT | 10222 |
| gb:MT106052 | Organism:Severe | TACTGTCCAAGACATGTGATCTGCACCTCTGAAGACATGCTTAACCCTAATTATGAAGAT | 10222 |
| gb:LC522975 | Organism:Severe | TACTGTCCAAGACATGTGATCTGCACCTCTGAAGACATGCTTAACCCTAATTATGAAGAT | 10219 |
| gb:LC522973 | Organism:Severe | TACTGTCCAAGACATGTGATCTGCACCTCTGAAGACATGCTTAACCCTAATTATGAAGAT | 10219 |
| gb:LC522974 | Organism:Severe | TACTGTCCAAGACATGTGATCTGCACCTCTGAAGACATGCTTAACCCTAATTATGAAGAT | 10219 |
| gb:MN985325 | Organism:Severe | TACTGTCCAAGACATGTGATCTGCACCTCTGAAGACATGCTTAACCCTAATTATGAAGAT | 10222 |
| gb:MT020881 | Organism:Severe | TACTGTCCAAGACATGTGATCTGCACCTCTGAAGACATGCTTAACCCTAATTATGAAGAT | 10222 |
| gb:MT020880 | Organism:Severe | TACTGTCCAAGACATGTGATCTGCACCTCTGAAGACATGCTTAACCCTAATTATGAAGAT | 10222 |
| gb:MT066175 | Organism:Severe | TACTGTCCAAGACATGTGATCTGCACCTCTGAAGACATGCTTAACCCTAATTATGAAGAT | 10222 |
| gb:MN997409 | Organism:Severe | TACTGTCCAAGACATGTGATCTGCACCTCTGAAGACATGCTTAACCCTAATTATGAAGAT | 10222 |
| gb:MN938384 | Organism:Severe | TACTGTCCAAGACATGTGATCTGCACCTCTGAAGACATGCTTAACCCTAATTATGAAGAT | 10190 |
| gb:MT044258 | Organism:Severe | TACTGTCCAAGACATGTGATCTGCACCTCTGAAGACATGCTTAACCCTAATTATGAAGAT | 10198 |
| gb:MT039890 | Organism:Severe | TACTGTCCAAGACATGTGATCTGCACCTCTGAAGACATGCTTAACCCTAATTATGAAGAT | 10222 |
| gb:MN988713 | Organism:Severe | TACTGTCCAAGACATGTGATCTGCACCTCTGAAGACATGCTTAACCCTAATTATGAAGAT | 10222 |
| gb:LC521925 | Organism:Severe | TACTGTCCAAGACATGTGATCTGCACCTCTGAAGACATGCTTAACCCTAATTATGAAGAT | 10195 |
| gb:MT093571 | Organism:Severe | TACTGTCCAAGACATGTGATCTGCACCTCTGAAGACATGCTTAACCCTAATTATGAAGAT | 10222 |
| gb:MT039887 | Organism:Severe | TACTGTCCAAGACATGTGATCTGCACCTCTGAAGACATGCTTAACCCTAATTATGAAGAT | 10222 |
| gb:MT019530 | Organism:Severe | TACTGTCCAAGACATGTGATCTGCACCTCTGAAGACATGCTTAACCCTAATTATGAAGAT | 10222 |
| gb:MT039888 | Organism:Severe | TACTGTCCAAGACATGTGATCTGCACCTCTGAAGACATGCTTAACCCTAATTATGAAGAT | 10222 |
| gb:LC522972 | Organism:Severe | TACTGTCCAAGACATGTGATCTGCACCTCTGAAGACATGCTTAACCCTAATTATGAAGAT | 10219 |
| gb:MT027063 | Organism:Severe | TACTGTCCAAGACATGTGATCTGCACCTCTGAAGACATGCTTAACCCTAATTATGAAGAT | 10222 |
| gb:MT027062 | Organism:Severe | TACTGTCCAAGACATGTGATCTGCACCTCTGAAGACATGCTTAACCCTAATTATGAAGAT | 10222 |
| gb:MT019529 | Organism:Severe | TACTGTCCAAGACATGTGATCTGCACCTCTGAAGACATGCTTAACCCTAATTATGAAGAT | 10222 |
| gb:MN996529 | Organism:Severe | TACTGTCCAAGACATGTGATCTGCACCTCTGAAGACATGCTTAACCCTAATTATGAAGAT | 10210 |
| gb:MN996531 | Organism:Severe | TACTGTCCAAGACATGTGATCTGCACCTCTGAAGACATGCTTAACCCTAATTATGAAGAT | 10209 |
| gb:MT066176 | Organism:Severe | TACTGTCCAAGACATGTGATCTGCACCTCTGAAGACATGCTTAACCCTAATTATGAAGAT | 10222 |
| gb:MT027064 | Organism:Severe | TACTGTCCAAGACATGTGATCTGCACCTCTGAAGACATGCTTAACCCTAATTATGAAGAT | 10222 |
| gb:MN994468 | Organism:Severe | TACTGTCCAAGACATGTGATCTGCACCTCTGAAGACATGCTTAACCCTAATTATGAAGAT | 10222 |
| gb:MT072688 | Organism:Severe | TACTGTCCAAGACATGTGATCTGCACCTCTGAAGACATGCTTAACCCTAATTATGAAGAT | 10207 |
| gb:MN996527 | Organism:Severe | TACTGTCCAAGACATGTGATCTGCACCTCTGAAGACATGCTTAACCCTAATTATGAAGAT | 10189 |
| gb:MT093631 | Organism:Severe | TACTGTCCAAGACATGTGATCTGCACCTCTGAAGACATGCTTAACCCTAATTATGAAGAT | 10260 |
| gb:MT106053 | Organism:Severe | TACTGTCCAAGACATGTGATCTGCACCTCTGAAGACATGCTTAACCCTAATTATGAAGAT | 10222 |
| gb:MT019533 | Organism:Severe | TACTGTCCAAGACATGTGATCTGCACCTCTGAAGACATGCTTAACCCTAATTATGAAGAT | 10222 |
| gb:MT019531 | Organism:Severe | TACTGTCCAAGACATGTGATCTGCACCTCTGAAGACATGCTTAACCCTAATTATGAAGAT | 10222 |
| gb:MN996528 | Organism:Severe | TACTGTCCAAGACATGTGATCTGCACCTCTGAAGACATGCTTAACCCTAATTATGAAGAT | 10222 |

|             |                  |                                                                        |       |
|-------------|------------------|------------------------------------------------------------------------|-------|
| gb:MN996530 | Organism: Severe | TACTGTCCAAGACATGTGATCTGCACCTCTGAAGACATGCTTAACCTAATTATGAAGAT            | 10208 |
| gb:MN908947 | Organism: Severe | TACTGTCCAAGACATGTGATCTGCACCTCTGAAGACATGCTTAACCTAATTATGAAGAT            | 10222 |
| gb:MT019532 | Organism: Severe | TACTGTCCAAGACATGTGATCTGCACCTCTGAAGACATGCTTAACCTAATTATGAAGAT<br>*****   | 10222 |
| gb:MT020781 | Organism: Severe | TTACTCATTTCGTAAGTCTAATCATAATTTCTTGGTACAGGCTGGTAATGTTCAACTCAGG          | 10270 |
| gb:MT007544 | Organism: Severe | TTACTCATTTCGTAAGTCTAATCATAATTTCTTGGTACAGGCTGGTAATGTTCAACTCAGG          | 10282 |
| gb:MN994467 | Organism: Severe | TTACTCATTTCGTAAGTCTAATCATAATTTCTTGGTACAGGCTGGTAATGTTCAACTCAGG          | 10282 |
| gb:MT044257 | Organism: Severe | TTACTCATTTCGTAAGTCTAATCATAATTTCTTGGTACAGGCTGGTAATGTTCAACTCAGG          | 10282 |
| gb:MT106054 | Organism: Severe | TTACTCATTTCGTAAGTCTAATCATAATTTCTTGGTACAGGCTGGTAATGTTCAACTCAGG          | 10282 |
| gb:MT049951 | Organism: Severe | TTACTCATTTCGTAAGTCTAATCATAATTTCTTGGTACAGGCTGGTAATGTTCAACTCAGG          | 10282 |
| gb:MN975262 | Organism: Severe | TTACTCATTTCGTAAGTCTAATCATAATTTCTTGGTACAGGCTGGTAATGTTCAACTCAGG          | 10282 |
| gb:MT106052 | Organism: Severe | TTACTCATTTCGTAAGTCTAATCATAATTTCTTGGTACAGGCTGGTAATGTTCAACTCAGG          | 10282 |
| gb:LC522975 | Organism: Severe | TTACTCATTTCGTAAGTCTAATCATAATTTCTTGGTACAGGCTGGTAATGTTCAACTCAGG          | 10279 |
| gb:LC522973 | Organism: Severe | TTACTCATTTCGTAAGTCTAATCATAATTTCTTGGTACAGGCTGGTAATGTTCAACTCAGG          | 10279 |
| gb:LC522974 | Organism: Severe | TTACTCATTTCGTAAGTCTAATCATAATTTCTTGGTACAGGCTGGTAATGTTCAACTCAGG          | 10279 |
| gb:MN985325 | Organism: Severe | TTACTCATTTCGTAAGTCTAATCATAATTTCTTGGTACAGGCTGGTAATGTTCAACTCAGG          | 10282 |
| gb:MT020881 | Organism: Severe | TTACTCATTTCGTAAGTCTAATCATAATTTCTTGGTACAGGCTGGTAATGTTCAACTCAGG          | 10282 |
| gb:MT020880 | Organism: Severe | TTACTCATTTCGTAAGTCTAATCATAATTTCTTGGTACAGGCTGGTAATGTTCAACTCAGG          | 10282 |
| gb:MT066175 | Organism: Severe | TTACTCATTTCGTAAGTCTAATCATAATTTCTTGGTACAGGCTGGTAATGTTCAACTCAGG          | 10282 |
| gb:MN997409 | Organism: Severe | TTACTCATTTCGTAAGTCTAATCATAATTTCTTGGTACAGGCTGGTAATGTTCAACTCAGG          | 10282 |
| gb:MN938384 | Organism: Severe | TTACTCATTTCGTAAGTCTAATCATAATTTCTTGGTACAGGCTGGTAATGTTCAACTCAGG          | 10250 |
| gb:MT044258 | Organism: Severe | TTACTCATTTCGTAAGTCTAATCATAATTTCTTGGTACAGGCTGGTAATGTTCAACTCAGG          | 10258 |
| gb:MT039890 | Organism: Severe | TTACTCATTTCGTAAGTCTAATCATAATTTCTTGGTACAGGCTGGTAATGTTCAACTCAGG          | 10282 |
| gb:MN988713 | Organism: Severe | TTACTCATTTCGTAAGTCTAATCATAATTTCTTGGTACAGGCTGGTAATGTTCAACTCAGG          | 10282 |
| gb:LC521925 | Organism: Severe | TTACTCATTTCGTAAGTCTAATCATAATTTCTTGGTACAGGCTGGTAATGTTCAACTCAGG          | 10255 |
| gb:MT093571 | Organism: Severe | TTACTCATTTCGTAAGTCTAATCATAATTTCTTGGTACAGGCTGGTAATGTTCAACTCAGG          | 10282 |
| gb:MT039887 | Organism: Severe | TTACTCATTTCGTAAGTCTAATCATAATTTCTTGGTACAGGCTGGTAATGTTCAACTCAGG          | 10282 |
| gb:MT019530 | Organism: Severe | TTACTCATTTCGTAAGTCTAATCATAATTTCTTGGTACAGGCTGGTAATGTTCAACTCAGG          | 10282 |
| gb:MT039888 | Organism: Severe | TTACTCATTTCGTAAGTCTAATCATAATTTCTTGGTACAGGCTGGTAATGTTCAACTCAGG          | 10282 |
| gb:LC522972 | Organism: Severe | TTACTCATTTCGTAAGTCTAATCATAATTTCTTGGTACAGGCTGGTAATGTTCAACTCAGG          | 10279 |
| gb:MT027063 | Organism: Severe | TTACTCATTTCGTAAGTCTAATCATAATTTCTTGGTACAGGCTGGTAATGTTCAACTCAGG          | 10282 |
| gb:MT027062 | Organism: Severe | TTACTCATTTCGTAAGTCTAATCATAATTTCTTGGTACAGGCTGGTAATGTTCAACTCAGG          | 10282 |
| gb:MT019529 | Organism: Severe | TTACTCATTTCGTAAGTCTAATCATAATTTCTTGGTACAGGCTGGTAATGTTCAACTCAGG          | 10282 |
| gb:MN996529 | Organism: Severe | TTACTCATTTCGTAAGTCTAATCATAATTTCTTGGTACAGGCTGGTAATGTTCAACTCAGG          | 10270 |
| gb:MN996531 | Organism: Severe | TTACTCATTTCGTAAGTCTAATCATAATTTCTTGGTACAGGCTGGTAATGTTCAACTCAGG          | 10269 |
| gb:MT066176 | Organism: Severe | TTACTCATTTCGTAAGTCTAATCATAATTTCTTGGTACAGGCTGGTAATGTTCAACTCAGG          | 10282 |
| gb:MT027064 | Organism: Severe | TTACTCATTTCGTAAGTCTAATCATAATTTCTTGGTACAGGCTGGTAATGTTCAACTCAGG          | 10282 |
| gb:MN994468 | Organism: Severe | TTACTCATTTCGTAAGTCTAATCATAATTTCTTGGTACAGGCTGGTAATGTTCAACTCAGG          | 10282 |
| gb:MT072688 | Organism: Severe | TTACTCATTTCGTAAGTCTAATCATAATTTCTTGGTACAGGCTGGTAATGTTCAACTCAGG          | 10267 |
| gb:MN996527 | Organism: Severe | TTACTCATTTCGTAAGTCTAATCATAATTTCTTGGTACAGGCTGGTAATGTTCAACTCAGG          | 10249 |
| gb:MT093631 | Organism: Severe | TTACTCATTTCGTAAGTCTAATCATAATTTCTTGGTACAGGCTGGTAATGTTCAACTCAGG          | 10320 |
| gb:MT106053 | Organism: Severe | TTACTCATTTCGTAAGTCTAATCATAATTTCTTGGTACAGGCTGGTAATGTTCAACTCAGG          | 10282 |
| gb:MT019533 | Organism: Severe | TTACTCATTTCGTAAGTCTAATCATAATTTCTTGGTACAGGCTGGTAATGTTCAACTCAGG          | 10282 |
| gb:MT019531 | Organism: Severe | TTACTCATTTCGTAAGTCTAATCATAATTTCTTGGTACAGGCTGGTAATGTTCAACTCAGG          | 10282 |
| gb:MN996528 | Organism: Severe | TTACTCATTTCGTAAGTCTAATCATAATTTCTTGGTACAGGCTGGTAATGTTCAACTCAGG          | 10282 |
| gb:MN996530 | Organism: Severe | TTACTCATTTCGTAAGTCTAATCATAATTTCTTGGTACAGGCTGGTAATGTTCAACTCAGG          | 10268 |
| gb:MN908947 | Organism: Severe | TTACTCATTTCGTAAGTCTAATCATAATTTCTTGGTACAGGCTGGTAATGTTCAACTCAGG          | 10282 |
| gb:MT019532 | Organism: Severe | TTACTCATTTCGTAAGTCTAATCATAATTTCTTGGTACAGGCTGGTAATGTTCAACTCAGG<br>***** | 10282 |

|             |                  |                                                              |       |
|-------------|------------------|--------------------------------------------------------------|-------|
| gb:MT020781 | Organism: Severe | GTTATTGGACATTCTATGCAAAATTTGTGACTTAAGCTTAAGGTTGATACAGCCAATCCT | 10330 |
| gb:MT007544 | Organism: Severe | GTTATTGGACATTCTATGCAAAATTTGTGACTTAAGCTTAAGGTTGATACAGCCAATCCT | 10342 |
| gb:MN994467 | Organism: Severe | GTTATTGGACATTCTATGCAAAATTTGTGACTTAAGCTTAAGGTTGATACAGCCAATCCT | 10342 |
| gb:MT044257 | Organism: Severe | GTTATTGGACATTCTATGCAAAATTTGTGACTTAAGCTTAAGGTTGATACAGCCAATCCT | 10342 |
| gb:MT106054 | Organism: Severe | GTTATTGGACATTCTATGCAAAATTTGTGACTTAAGCTTAAGGTTGATACAGCCAATCCT | 10342 |
| gb:MT049951 | Organism: Severe | GTTATTGGACATTCTATGCAAAATTTGTGACTTAAGCTTAAGGTTGATACAGCCAATCCT | 10342 |
| gb:MN975262 | Organism: Severe | GTTATTGGACATTCTATGCAAAATTTGTGACTTAAGCTTAAGGTTGATACAGCCAATCCT | 10342 |
| gb:MT106052 | Organism: Severe | GTTATTGGACATTCTATGCAAAATTTGTGACTTAAGCTTAAGGTTGATACAGCCAATCCT | 10342 |
| gb:LC522975 | Organism: Severe | GTTATTGGACATTCTATGCAAAATTTGTGACTTAAGCTTAAGGTTGATACAGCCAATCCT | 10339 |
| gb:LC522973 | Organism: Severe | GTTATTGGACATTCTATGCAAAATTTGTGACTTAAGCTTAAGGTTGATACAGCCAATCCT | 10339 |
| gb:LC522974 | Organism: Severe | GTTATTGGACATTCTATGCAAAATTTGTGACTTAAGCTTAAGGTTGATACAGCCAATCCT | 10339 |
| gb:MN985325 | Organism: Severe | GTTATTGGACATTCTATGCAAAATTTGTGACTTAAGCTTAAGGTTGATACAGCCAATCCT | 10342 |
| gb:MT020881 | Organism: Severe | GTTATTGGACATTCTATGCAAAATTTGTGACTTAAGCTTAAGGTTGATACAGCCAATCCT | 10342 |
| gb:MT020880 | Organism: Severe | GTTATTGGACATTCTATGCAAAATTTGTGACTTAAGCTTAAGGTTGATACAGCCAATCCT | 10342 |

|             |                 |                                                             |       |
|-------------|-----------------|-------------------------------------------------------------|-------|
| gb:MT066175 | Organism:Severe | GTTATTGGACATTCTATGCAAAATTGTGACTTAAGCTTAAGGTTGATACAGCCAATCCT | 10342 |
| gb:MN997409 | Organism:Severe | GTTATTGGACATTCTATGCAAAATTGTGACTTAAGCTTAAGGTTGATACAGCCAATCCT | 10342 |
| gb:MN938384 | Organism:Severe | GTTATTGGACATTCTATGCAAAATTGTGACTTAAGCTTAAGGTTGATACAGCCAATCCT | 10310 |
| gb:MT044258 | Organism:Severe | GTTATTGGACATTCTATGCAAAATTGTGACTTAAGCTTAAGGTTGATACAGCCAATCCT | 10318 |
| gb:MT039890 | Organism:Severe | GTTATTGGACATTCTATGCAAAATTGTGACTTAAGCTTAAGGTTGATACAGCCAATCCT | 10342 |
| gb:MN988713 | Organism:Severe | GTTATTGGACATTCTATGCAAAATTGTGACTTAAGCTTAAGGTTGATACAGCCAATCCT | 10342 |
| gb:LC521925 | Organism:Severe | GTTATTGGACATTCTATGCAAAATTGTGACTTAAGCTTAAGGTTGATACAGCCAATCCT | 10315 |
| gb:MT093571 | Organism:Severe | GTTATTGGACATTCTATGCAAAATTGTGACTTAAGCTTAAGGTTGATACAGCCAATCCT | 10342 |
| gb:MT039887 | Organism:Severe | GTTATTGGACATTCTATGCAAAATTGTGACTTAAGCTTAAGGTTGATACAGCCAATCCT | 10342 |
| gb:MT019530 | Organism:Severe | GTTATTGGACATTCTATGCAAAATTGTGACTTAAGCTTAAGGTTGATACAGCCAATCCT | 10342 |
| gb:MT039888 | Organism:Severe | GTTATTGGACATTCTATGCAAAATTGTGACTTAAGCTTAAGGTTGATACAGCCAATCCT | 10342 |
| gb:LC522972 | Organism:Severe | GTTATTGGACATTCTATGCAAAATTGTGACTTAAGCTTAAGGTTGATACAGCCAATCCT | 10339 |
| gb:MT027063 | Organism:Severe | GTTATTGGACATTCTATGCAAAATTGTGACTTAAGCTTAAGGTTGATACAGCCAATCCT | 10342 |
| gb:MT027062 | Organism:Severe | GTTATTGGACATTCTATGCAAAATTGTGACTTAAGCTTAAGGTTGATACAGCCAATCCT | 10342 |
| gb:MT019529 | Organism:Severe | GTTATTGGACATTCTATGCAAAATTGTGACTTAAGCTTAAGGTTGATACAGCCAATCCT | 10342 |
| gb:MN996529 | Organism:Severe | GTTATTGGACATTCTATGCAAAATTGTGACTTAAGCTTAAGGTTGATACAGCCAATCCT | 10330 |
| gb:MN996531 | Organism:Severe | GTTATTGGACATTCTATGCAAAATTGTGACTTAAGCTTAAGGTTGATACAGCCAATCCT | 10329 |
| gb:MT066176 | Organism:Severe | GTTATTGGACATTCTATGCAAAATTGTGACTTAAGCTTAAGGTTGATACAGCCAATCCT | 10342 |
| gb:MT027064 | Organism:Severe | GTTATTGGACATTCTATGCAAAATTGTGACTTAAGCTTAAGGTTGATACAGCCAATCCT | 10342 |
| gb:MN994468 | Organism:Severe | GTTATTGGACATTCTATGCAAAATTGTGACTTAAGCTTAAGGTTGATACAGCCAATCCT | 10342 |
| gb:MT072688 | Organism:Severe | GTTATTGGACATTCTATGCAAAATTGTGACTTAAGCTTAAGGTTGATACAGCCAATCCT | 10327 |
| gb:MN996527 | Organism:Severe | GTTATTGGACATTCTATGCAAAATTGTGACTTAAGCTTAAGGTTGATACAGCCAATCCT | 10309 |
| gb:MT093631 | Organism:Severe | GTTATTGGACATTCTATGCAAAATTGTGACTTAAGCTTAAGGTTGATACAGCCAATCCT | 10380 |
| gb:MT106053 | Organism:Severe | GTTATTGGACATTCTATGCAAAATTGTGACTTAAGCTTAAGGTTGATACAGCCAATCCT | 10342 |
| gb:MT019533 | Organism:Severe | GTTATTGGACATTCTATGCAAAATTGTGACTTAAGCTTAAGGTTGATACAGCCAATCCT | 10342 |
| gb:MT019531 | Organism:Severe | GTTATTGGACATTCTATGCAAAATTGTGACTTAAGCTTAAGGTTGATACAGCCAATCCT | 10342 |
| gb:MN996528 | Organism:Severe | GTTATTGGACATTCTATGCAAAATTGTGACTTAAGCTTAAGGTTGATACAGCCAATCCT | 10342 |
| gb:MN996530 | Organism:Severe | GTTATTGGACATTCTATGCAAAATTGTGACTTAAGCTTAAGGTTGATACAGCCAATCCT | 10328 |
| gb:MN908947 | Organism:Severe | GTTATTGGACATTCTATGCAAAATTGTGACTTAAGCTTAAGGTTGATACAGCCAATCCT | 10342 |
| gb:MT019532 | Organism:Severe | GTTATTGGACATTCTATGCAAAATTGTGACTTAAGCTTAAGGTTGATACAGCCAATCCT | 10342 |

\*\*\*\*\*

|             |                 |                                                              |       |
|-------------|-----------------|--------------------------------------------------------------|-------|
| gb:MT020781 | Organism:Severe | AAGACACCTAAGTATAAGTTTGTTCGCATTCAACCAGGACAGACTTTTTTCAGTGTAGCT | 10390 |
| gb:MT007544 | Organism:Severe | AAGACACCTAAGTATAAGTTTGTTCGCATTCAACCAGGACAGACTTTTTTCAGTGTAGCT | 10402 |
| gb:MN994467 | Organism:Severe | AAGACACCTAAGTATAAGTTTGTTCGCATTCAACCAGGACAGACTTTTTTCAGTGTAGCT | 10402 |
| gb:MT044257 | Organism:Severe | AAGACACCTAAGTATAAGTTTGTTCGCATTCAACCAGGACAGACTTTTTTCAGTGTAGCT | 10402 |
| gb:MT106054 | Organism:Severe | AAGACACCTAAGTATAAGTTTGTTCGCATTCAACCAGGACAGACTTTTTTCAGTGTAGCT | 10402 |
| gb:MT049951 | Organism:Severe | AAGACACCTAAGTATAAGTTTGTTCGCATTCAACCAGGACAGACTTTTTTCAGTGTAGCT | 10402 |
| gb:MN975262 | Organism:Severe | AAGACACCTAAGTATAAGTTTGTTCGCATTCAACCAGGACAGACTTTTTTCAGTGTAGCT | 10402 |
| gb:MT106052 | Organism:Severe | AAGACACCTAAGTATAAGTTTGTTCGCATTCAACCAGGACAGACTTTTTTCAGTGTAGCT | 10402 |
| gb:LC522975 | Organism:Severe | AAGACACCTAAGTATAAGTTTGTTCGCATTCAACCAGGACAGACTTTTTTCAGTGTAGCT | 10399 |
| gb:LC522973 | Organism:Severe | AAGACACCTAAGTATAAGTTTGTTCGCATTCAACCAGGACAGACTTTTTTCAGTGTAGCT | 10399 |
| gb:LC522974 | Organism:Severe | AAGACACCTAAGTATAAGTTTGTTCGCATTCAACCAGGACAGACTTTTTTCAGTGTAGCT | 10399 |
| gb:MN985325 | Organism:Severe | AAGACACCTAAGTATAAGTTTGTTCGCATTCAACCAGGACAGACTTTTTTCAGTGTAGCT | 10402 |
| gb:MT020881 | Organism:Severe | AAGACACCTAAGTATAAGTTTGTTCGCATTCAACCAGGACAGACTTTTTTCAGTGTAGCT | 10402 |
| gb:MT020880 | Organism:Severe | AAGACACCTAAGTATAAGTTTGTTCGCATTCAACCAGGACAGACTTTTTTCAGTGTAGCT | 10402 |
| gb:MT066175 | Organism:Severe | AAGACACCTAAGTATAAGTTTGTTCGCATTCAACCAGGACAGACTTTTTTCAGTGTAGCT | 10402 |
| gb:MN997409 | Organism:Severe | AAGACACCTAAGTATAAGTTTGTTCGCATTCAACCAGGACAGACTTTTTTCAGTGTAGCT | 10402 |
| gb:MN938384 | Organism:Severe | AAGACACCTAAGTATAAGTTTGTTCGCATTCAACCAGGACAGACTTTTTTCAGTGTAGCT | 10370 |
| gb:MT044258 | Organism:Severe | AAGACACCTAAGTATAAGTTTGTTCGCATTCAACCAGGACAGACTTTTTTCAGTGTAGCT | 10378 |
| gb:MT039890 | Organism:Severe | AAGACACCTAAGTATAAGTTTGTTCGCATTCAACCAGGACAGACTTTTTTCAGTGTAGCT | 10402 |
| gb:MN988713 | Organism:Severe | AAGACACCTAAGTATAAGTTTGTTCGCATTCAACCAGGACAGACTTTTTTCAGTGTAGCT | 10402 |
| gb:LC521925 | Organism:Severe | AAGACACCTAAGTATAAGTTTGTTCGCATTCAACCAGGACAGACTTTTTTCAGTGTAGCT | 10375 |
| gb:MT093571 | Organism:Severe | AAGACACCTAAGTATAAGTTTGTTCGCATTCAACCAGGACAGACTTTTTTCAGTGTAGCT | 10402 |
| gb:MT039887 | Organism:Severe | AAGACACCTAAGTATAAGTTTGTTCGCATTCAACCAGGACAGACTTTTTTCAGTGTAGCT | 10402 |
| gb:MT019530 | Organism:Severe | AAGACACCTAAGTATAAGTTTGTTCGCATTCAACCAGGACAGACTTTTTTCAGTGTAGCT | 10402 |
| gb:MT039888 | Organism:Severe | AAGACACCTAAGTATAAGTTTGTTCGCATTCAACCAGGACAGACTTTTTTCAGTGTAGCT | 10402 |
| gb:LC522972 | Organism:Severe | AAGACACCTAAGTATAAGTTTGTTCGCATTCAACCAGGACAGACTTTTTTCAGTGTAGCT | 10399 |
| gb:MT027063 | Organism:Severe | AAGACACCTAAGTATAAGTTTGTTCGCATTCAACCAGGACAGACTTTTTTCAGTGTAGCT | 10402 |
| gb:MT027062 | Organism:Severe | AAGACACCTAAGTATAAGTTTGTTCGCATTCAACCAGGACAGACTTTTTTCAGTGTAGCT | 10402 |
| gb:MT019529 | Organism:Severe | AAGACACCTAAGTATAAGTTTGTTCGCATTCAACCAGGACAGACTTTTTTCAGTGTAGCT | 10402 |
| gb:MN996529 | Organism:Severe | AAGACACCTAAGTATAAGTTTGTTCGCATTCAACCAGGACAGACTTTTTTCAGTGTAGCT | 10390 |
| gb:MN996531 | Organism:Severe | AAGACACCTAAGTATAAGTTTGTTCGCATTCAACCAGGACAGACTTTTTTCAGTGTAGCT | 10389 |
| gb:MT066176 | Organism:Severe | AAGACACCTAAGTATAAGTTTGTTCGCATTCAACCAGGACAGACTTTTTTCAGTGTAGCT | 10402 |
| gb:MT027064 | Organism:Severe | AAGACACCTAAGTATAAGTTTGTTCGCATTCAACCAGGACAGACTTTTTTCAGTGTAGCT | 10402 |

|             |                 |                                                              |       |
|-------------|-----------------|--------------------------------------------------------------|-------|
| gb:MN994468 | Organism:Severe | AAGACACCTAAGTATAAGTTTGTTCGCATTCAACCAGGACAGACTTTTTTCAGTGTAGCT | 10402 |
| gb:MT072688 | Organism:Severe | AAGACACCTAAGTATAAGTTTGTTCGCATTCAACCAGGACAGACTTTTTTCAGTGTAGCT | 10387 |
| gb:MN996527 | Organism:Severe | AAGACACCTAAGTATAAGTTTGTTCGCATTCAACCAGGACAGACTTTTTTCAGTGTAGCT | 10369 |
| gb:MT093631 | Organism:Severe | AAGACACCTAAGTATAAGTTTGTTCGCATTCAACCAGGACAGACTTTTTTCAGTGTAGCT | 10440 |
| gb:MT106053 | Organism:Severe | AAGACACCTAAGTATAAGTTTGTTCGCATTCAACCAGGACAGACTTTTTTCAGTGTAGCT | 10402 |
| gb:MT019533 | Organism:Severe | AAGACACCTAAGTATAAGTTTGTTCGCATTCAACCAGGACAGACTTTTTTCAGTGTAGCT | 10402 |
| gb:MT019531 | Organism:Severe | AAGACACCTAAGTATAAGTTTGTTCGCATTCAACCAGGACAGACTTTTTTCAGTGTAGCT | 10402 |
| gb:MN996528 | Organism:Severe | AAGACACCTAAGTATAAGTTTGTTCGCATTCAACCAGGACAGACTTTTTTCAGTGTAGCT | 10402 |
| gb:MN996530 | Organism:Severe | AAGACACCTAAGTATAAGTTTGTTCGCATTCAACCAGGACAGACTTTTTTCAGTGTAGCT | 10388 |
| gb:MN908947 | Organism:Severe | AAGACACCTAAGTATAAGTTTGTTCGCATTCAACCAGGACAGACTTTTTTCAGTGTAGCT | 10402 |
| gb:MT019532 | Organism:Severe | AAGACACCTAAGTATAAGTTTGTTCGCATTCAACCAGGACAGACTTTTTTCAGTGTAGCT | 10402 |

\*\*\*\*\*

|             |                 |                                                              |       |
|-------------|-----------------|--------------------------------------------------------------|-------|
| gb:MT020781 | Organism:Severe | TGTTACAATGGTTCACCATCTGGTGTTTACCAATGTGCTATGAGGCCCAATTTCACTATT | 10450 |
| gb:MT007544 | Organism:Severe | TGTTACAATGGTTCACCATCTGGTGTTTACCAATGTGCTATGAGGCCCAATTTCACTATT | 10462 |
| gb:MN994467 | Organism:Severe | TGTTACAATGGTTCACCATCTGGTGTTTACCAATGTGCTATGAGGCCCAATTTCACTATT | 10462 |
| gb:MT044257 | Organism:Severe | TGTTACAATGGTTCACCATCTGGTGTTTACCAATGTGCTATGAGGCCCAATTTCACTATT | 10462 |
| gb:MT106054 | Organism:Severe | TGTTACAATGGTTCACCATCTGGTGTTTACCAATGTGCTATGAGGCCCAATTTCACTATT | 10462 |
| gb:MT049951 | Organism:Severe | TGTTACAATGGTTCACCATCTGGTGTTTACCAATGTGCTATGAGGCCCAATTTCACTATT | 10462 |
| gb:MN975262 | Organism:Severe | TGTTACAATGGTTCACCATCTGGTGTTTACCAATGTGCTATGAGGCCCAATTTCACTATT | 10462 |
| gb:MT106052 | Organism:Severe | TGTTACAATGGTTCACCATCTGGTGTTTACCAATGTGCTATGAGGCCCAATTTCACTATT | 10462 |
| gb:LC522975 | Organism:Severe | TGTTACAATGGTTCACCATCTGGTGTTTACCAATGTGCTATGAGGCCCAATTTCACTATT | 10459 |
| gb:LC522973 | Organism:Severe | TGTTACAATGGTTCACCATCTGGTGTTTACCAATGTGCTATGAGGCCCAATTTCACTATT | 10459 |
| gb:LC522974 | Organism:Severe | TGTTACAATGGTTCACCATCTGGTGTTTACCAATGTGCTATGAGGCCCAATTTCACTATT | 10459 |
| gb:MN985325 | Organism:Severe | TGTTACAATGGTTCACCATCTGGTGTTTACCAATGTGCTATGAGGCCCAATTTCACTATT | 10462 |
| gb:MT020881 | Organism:Severe | TGTTACAATGGTTCACCATCTGGTGTTTACCAATGTGCTATGAGGCCCAATTTCACTATT | 10462 |
| gb:MT020880 | Organism:Severe | TGTTACAATGGTTCACCATCTGGTGTTTACCAATGTGCTATGAGGCCCAATTTCACTATT | 10462 |
| gb:MT066175 | Organism:Severe | TGTTACAATGGTTCACCATCTGGTGTTTACCAATGTGCTATGAGGCCCAATTTCACTATT | 10462 |
| gb:MN997409 | Organism:Severe | TGTTACAATGGTTCACCATCTGGTGTTTACCAATGTGCTATGAGGCCCAATTTCACTATT | 10462 |
| gb:MN938384 | Organism:Severe | TGTTACAATGGTTCACCATCTGGTGTTTACCAATGTGCTATGAGGCCCAATTTCACTATT | 10430 |
| gb:MT044258 | Organism:Severe | TGTTACAATGGTTCACCATCTGGTGTTTACCAATGTGCTATGAGGCCCAATTTCACTATT | 10438 |
| gb:MT039890 | Organism:Severe | TGTTACAATGGTTCACCATCTGGTGTTTACCAATGTGCTATGAGGCCCAATTTCACTATT | 10462 |
| gb:MN988713 | Organism:Severe | TGTTACAATGGTTCACCATCTGGTGTTTACCAATGTGCTATGAGGCCCAATTTCACTATT | 10462 |
| gb:LC521925 | Organism:Severe | TGTTACAATGGTTCACCATCTGGTGTTTACCAATGTGCTATGAGGCCCAATTTCACTATT | 10435 |
| gb:MT093571 | Organism:Severe | TGTTACAATGGTTCACCATCTGGTGTTTACCAATGTGCTATGAGGCCCAATTTCACTATT | 10462 |
| gb:MT039887 | Organism:Severe | TGTTACAATGGTTCACCATCTGGTGTTTACCAATGTGCTATGAGGCCCAATTTCACTATT | 10462 |
| gb:MT019530 | Organism:Severe | TGTTACAATGGTTCACCATCTGGTGTTTACCAATGTGCTATGAGGCCCAATTTCACTATT | 10462 |
| gb:MT039888 | Organism:Severe | TGTTACAATGGTTCACCATCTGGTGTTTACCAATGTGCTATGAGGCCCAATTTCACTATT | 10462 |
| gb:LC522972 | Organism:Severe | TGTTACAATGGTTCACCATCTGGTGTTTACCAATGTGCTATGAGGCCCAATTTCACTATT | 10459 |
| gb:MT027063 | Organism:Severe | TGTTACAATGGTTCACCATCTGGTGTTTACCAATGTGCTATGAGGCCCAATTTCACTATT | 10462 |
| gb:MT027062 | Organism:Severe | TGTTACAATGGTTCACCATCTGGTGTTTACCAATGTGCTATGAGGCCCAATTTCACTATT | 10462 |
| gb:MT019529 | Organism:Severe | TGTTACAATGGTTCACCATCTGGTGTTTACCAATGTGCTATGAGGCCCAATTTCACTATT | 10462 |
| gb:MN996529 | Organism:Severe | TGTTACAATGGTTCACCATCTGGTGTTTACCAATGTGCTATGAGGCCCAATTTCACTATT | 10450 |
| gb:MN996531 | Organism:Severe | TGTTACAATGGTTCACCATCTGGTGTTTACCAATGTGCTATGAGGCCCAATTTCACTATT | 10449 |
| gb:MT066176 | Organism:Severe | TGTTACAATGGTTCACCATCTGGTGTTTACCAATGTGCTATGAGGCCCAATTTCACTATT | 10462 |
| gb:MT027064 | Organism:Severe | TGTTACAATGGTTCACCATCTGGTGTTTACCAATGTGCTATGAGGCCCAATTTCACTATT | 10462 |
| gb:MN994468 | Organism:Severe | TGTTACAATGGTTCACCATCTGGTGTTTACCAATGTGCTATGAGGCCCAATTTCACTATT | 10462 |
| gb:MT072688 | Organism:Severe | TGTTACAATGGTTCACCATCTGGTGTTTACCAATGTGCTATGAGGCCCAATTTCACTATT | 10447 |
| gb:MN996527 | Organism:Severe | TGTTACAATGGTTCACCATCTGGTGTTTACCAATGTGCTATGAGGCCCAATTTCACTATT | 10429 |
| gb:MT093631 | Organism:Severe | TGTTACAATGGTTCACCATCTGGTGTTTACCAATGTGCTATGAGGCCCAATTTCACTATT | 10500 |
| gb:MT106053 | Organism:Severe | TGTTACAATGGTTCACCATCTGGTGTTTACCAATGTGCTATGAGGCCCAATTTCACTATT | 10462 |
| gb:MT019533 | Organism:Severe | TGTTACAATGGTTCACCATCTGGTGTTTACCAATGTGCTATGAGGCCCAATTTCACTATT | 10462 |
| gb:MT019531 | Organism:Severe | TGTTACAATGGTTCACCATCTGGTGTTTACCAATGTGCTATGAGGCCCAATTTCACTATT | 10462 |
| gb:MN996528 | Organism:Severe | TGTTACAATGGTTCACCATCTGGTGTTTACCAATGTGCTATGAGGCCCAATTTCACTATT | 10462 |
| gb:MN996530 | Organism:Severe | TGTTACAATGGTTCACCATCTGGTGTTTACCAATGTGCTATGAGGCCCAATTTCACTATT | 10448 |
| gb:MN908947 | Organism:Severe | TGTTACAATGGTTCACCATCTGGTGTTTACCAATGTGCTATGAGGCCCAATTTCACTATT | 10462 |
| gb:MT019532 | Organism:Severe | TGTTACAATGGTTCACCATCTGGTGTTTACCAATGTGCTATGAGGCCCAATTTCACTATT | 10462 |

\*\*\*\*\*

|             |                 |                                                             |       |
|-------------|-----------------|-------------------------------------------------------------|-------|
| gb:MT020781 | Organism:Severe | AAGGGTTCATTCCTTAATGGTTCATGTGGTAGTGTGGTTTTAACATAGATTATGACTGT | 10510 |
| gb:MT007544 | Organism:Severe | AAGGGTTCATTCCTTAATGGTTCATGTGGTAGTGTGGTTTTAACATAGATTATGACTGT | 10522 |
| gb:MN994467 | Organism:Severe | AAGGGTTCATTCCTTAATGGTTCATGTGGTAGTGTGGTTTTAACATAGATTATGACTGT | 10522 |
| gb:MT044257 | Organism:Severe | AAGGGTTCATTCCTTAATGGTTCATGTGGTAGTGTGGTTTTAACATAGATTATGACTGT | 10522 |
| gb:MT106054 | Organism:Severe | AAGGGTTCATTCCTTAATGGTTCATGTGGTAGTGTGGTTTTAACATAGATTATGACTGT | 10522 |
| gb:MT049951 | Organism:Severe | AAGGGTTCATTCCTTAATGGTTCATGTGGTAGTGTGGTTTTAACATAGATTATGACTGT | 10522 |



|             |                 |                                                              |       |
|-------------|-----------------|--------------------------------------------------------------|-------|
| gb:LC522972 | Organism:Severe | GTCTCTTTTTGTTACATGCACCATATGGAATTACCAACTGGAGTTCATGCTGGCACAGAC | 10579 |
| gb:MT027063 | Organism:Severe | GTCTCTTTTTGTTACATGCACCATATGGAATTACCAACTGGAGTTCATGCTGGCACAGAC | 10582 |
| gb:MT027062 | Organism:Severe | GTCTCTTTTTGTTACATGCACCATATGGAATTACCAACTGGAGTTCATGCTGGCACAGAC | 10582 |
| gb:MT019529 | Organism:Severe | GTCTCTTTTTGTTACATGCACCATATGGAATTACCAACTGGAGTTCATGCTGGCACAGAC | 10582 |
| gb:MN996529 | Organism:Severe | GTCTCTTTTTGTTACATGCACCATATGGAATTACCAACTGGAGTTCATGCTGGCACAGAC | 10570 |
| gb:MN996531 | Organism:Severe | GTCTCTTTTTGTTACATGCACCATATGGAATTACCAACTGGAGTTCATGCTGGCACAGAC | 10569 |
| gb:MT066176 | Organism:Severe | GTCTCTTTTTGTTACATGCACCATATGGAATTACCAACTGGAGTTCATGCTGGCACAGAC | 10582 |
| gb:MT027064 | Organism:Severe | GTCTCTTTTTGTTACATGCACCATATGGAATTACCAACTGGAGTTCATGCTGGCACAGAC | 10582 |
| gb:MN994468 | Organism:Severe | GTCTCTTTTTGTTACATGCACCATATGGAATTACCAACTGGAGTTCATGCTGGCACAGAC | 10582 |
| gb:MT072688 | Organism:Severe | GTCTCTTTTTGTTACATGCACCATATGGAATTACCAACTGGAGTTCATGCTGGCACAGAC | 10567 |
| gb:MN996527 | Organism:Severe | GTCTCTTTTTGTTACATGCACCATATGGAATTACCAACTGGAGTTCATGCTGGCACAGAC | 10549 |
| gb:MT093631 | Organism:Severe | GTCTCTTTTTGTTACATGCACCATATGGAATTACCAACTGGAGTTCATGCTGGCACAGAC | 10620 |
| gb:MT106053 | Organism:Severe | GTCTCTTTTTGTTACATGCACCATATGGAATTACCAACTGGAGTTCATGCTGGCACAGAC | 10582 |
| gb:MT019533 | Organism:Severe | GTCTCTTTTTGTTACATGCACCATATGGAATTACCAACTGGAGTTCATGCTGGCACAGAC | 10582 |
| gb:MT019531 | Organism:Severe | GTCTCTTTTTGTTACATGCACCATATGGAATTACCAACTGGAGTTCATGCTGGCACAGAC | 10582 |
| gb:MN996528 | Organism:Severe | GTCTCTTTTTGTTACATGCACCATATGGAATTACCAACTGGAGTTCATGCTGGCACAGAC | 10582 |
| gb:MN996530 | Organism:Severe | GTCTCTTTTTGTTACATGCACCATATGGAATTACCAACTGGAGTTCATGCTGGCACAGAC | 10568 |
| gb:MN908947 | Organism:Severe | GTCTCTTTTTGTTACATGCACCATATGGAATTACCAACTGGAGTTCATGCTGGCACAGAC | 10582 |
| gb:MT019532 | Organism:Severe | GTCTCTTTTTGTTACATGCACCATATGGAATTACCAACTGGAGTTCATGCTGGCACAGAC | 10582 |

\*\*\*\*\*

|             |                 |                                                             |       |
|-------------|-----------------|-------------------------------------------------------------|-------|
| gb:MT020781 | Organism:Severe | TTAGAAGGTAACTTTTATGGACCTTTTGTGACAGGCAAACAGCACAAGCAGCTGGTACG | 10630 |
| gb:MT007544 | Organism:Severe | TTAGAAGGTAACTTTTATGGACCTTTTGTGACAGGCAAACAGCACAAGCAGCTGGTACG | 10642 |
| gb:MN994467 | Organism:Severe | TTAGAAGGTAACTTTTATGGACCTTTTGTGACAGGCAAACAGCACAAGCAGCTGGTACG | 10642 |
| gb:MT044257 | Organism:Severe | TTAGAAGGTAACTTTTATGGACCTTTTGTGACAGGCAAACAGCACAAGCAGCTGGTACG | 10642 |
| gb:MT106054 | Organism:Severe | TTAGAAGGTAACTTTTATGGACCTTTTGTGACAGGCAAACAGCACAAGCAGCTGGTACG | 10642 |
| gb:MT049951 | Organism:Severe | TTAGAAGGTAACTTTTATGGACCTTTTGTGACAGGCAAACAGCACAAGCAGCTGGTACG | 10642 |
| gb:MN975262 | Organism:Severe | TTAGAAGGTAACTTTTATGGACCTTTTGTGACAGGCAAACAGCACAAGCAGCTGGTACG | 10642 |
| gb:MT106052 | Organism:Severe | TTAGAAGGTAACTTTTATGGACCTTTTGTGACAGGCAAACAGCACAAGCAGCTGGTACG | 10642 |
| gb:LC522975 | Organism:Severe | TTAGAAGGTAACTTTTATGGACCTTTTGTGACAGGCAAACAGCACAAGCAGCTGGTACG | 10639 |
| gb:LC522973 | Organism:Severe | TTAGAAGGTAACTTTTATGGACCTTTTGTGACAGGCAAACAGCACAAGCAGCTGGTACG | 10639 |
| gb:LC522974 | Organism:Severe | TTAGAAGGTAACTTTTATGGACCTTTTGTGACAGGCAAACAGCACAAGCAGCTGGTACG | 10639 |
| gb:MN985325 | Organism:Severe | TTAGAAGGTAACTTTTATGGACCTTTTGTGACAGGCAAACAGCACAAGCAGCTGGTACG | 10642 |
| gb:MT020881 | Organism:Severe | TTAGAAGGTAACTTTTATGGACCTTTTGTGACAGGCAAACAGCACAAGCAGCTGGTACG | 10642 |
| gb:MT020880 | Organism:Severe | TTAGAAGGTAACTTTTATGGACCTTTTGTGACAGGCAAACAGCACAAGCAGCTGGTACG | 10642 |
| gb:MT066175 | Organism:Severe | TTAGAAGGTAACTTTTATGGACCTTTTGTGACAGGCAAACAGCACAAGCAGCTGGTACG | 10642 |
| gb:MN997409 | Organism:Severe | TTAGAAGGTAACTTTTATGGACCTTTTGTGACAGGCAAACAGCACAAGCAGCTGGTACG | 10642 |
| gb:MN938384 | Organism:Severe | TTAGAAGGTAACTTTTATGGACCTTTTGTGACAGGCAAACAGCACAAGCAGCTGGTACG | 10610 |
| gb:MT044258 | Organism:Severe | TTAGAAGGTAACTTTTATGGACCTTTTGTGACAGGCAAACAGCACAAGCAGCTGGTACG | 10618 |
| gb:MT039890 | Organism:Severe | TTAGAAGGTAACTTTTATGGACCTTTTGTGACAGGCAAACAGCACAAGCAGCTGGTACG | 10642 |
| gb:MN988713 | Organism:Severe | TTAGAAGGTAACTTTTATGGACCTTTTGTGACAGGCAAACAGCACAAGCAGCTGGTACG | 10642 |
| gb:LC521925 | Organism:Severe | TTAGAAGGTAACTTTTATGGACCTTTTGTGACAGGCAAACAGCACAAGCAGCTGGTACG | 10615 |
| gb:MT093571 | Organism:Severe | TTAGAAGGTAACTTTTATGGACCTTTTGTGACAGGCAAACAGCACAAGCAGCTGGTACG | 10642 |
| gb:MT039887 | Organism:Severe | TTAGAAGGTAACTTTTATGGACCTTTTGTGACAGGCAAACAGCACAAGCAGCTGGTACG | 10642 |
| gb:MT019530 | Organism:Severe | TTAGAAGGTAACTTTTATGGACCTTTTGTGACAGGCAAACAGCACAAGCAGCTGGTACG | 10642 |
| gb:MT039888 | Organism:Severe | TTAGAAGGTAACTTTTATGGACCTTTTGTGACAGGCAAACAGCACAAGCAGCTGGTACG | 10642 |
| gb:LC522972 | Organism:Severe | TTAGAAGGTAACTTTTATGGACCTTTTGTGACAGGCAAACAGCACAAGCAGCTGGTACG | 10639 |
| gb:MT027063 | Organism:Severe | TTAGAAGGTAACTTTTATGGACCTTTTGTGACAGGCAAACAGCACAAGCAGCTGGTACG | 10642 |
| gb:MT027062 | Organism:Severe | TTAGAAGGTAACTTTTATGGACCTTTTGTGACAGGCAAACAGCACAAGCAGCTGGTACG | 10642 |
| gb:MT019529 | Organism:Severe | TTAGAAGGTAACTTTTATGGACCTTTTGTGACAGGCAAACAGCACAAGCAGCTGGTACG | 10642 |
| gb:MN996529 | Organism:Severe | TTAGAAGGTAACTTTTATGGACCTTTTGTGACAGGCAAACAGCACAAGCAGCTGGTACG | 10630 |
| gb:MN996531 | Organism:Severe | TTAGAAGGTAACTTTTATGGACCTTTTGTGACAGGCAAACAGCACAAGCAGCTGGTACG | 10629 |
| gb:MT066176 | Organism:Severe | TTAGAAGGTAACTTTTATGGACCTTTTGTGACAGGCAAACAGCACAAGCAGCTGGTACG | 10642 |
| gb:MT027064 | Organism:Severe | TTAGAAGGTAACTTTTATGGACCTTTTGTGACAGGCAAACAGCACAAGCAGCTGGTACG | 10642 |
| gb:MN994468 | Organism:Severe | TTAGAAGGTAACTTTTATGGACCTTTTGTGACAGGCAAACAGCACAAGCAGCTGGTACG | 10642 |
| gb:MT072688 | Organism:Severe | TTAGAAGGTAACTTTTATGGACCTTTTGTGACAGGCAAACAGCACAAGCAGCTGGTACG | 10627 |
| gb:MN996527 | Organism:Severe | TTAGAAGGTAACTTTTATGGACCTTTTGTGACAGGCAAACAGCACAAGCAGCTGGTACG | 10609 |
| gb:MT093631 | Organism:Severe | TTAGAAGGTAACTTTTATGGACCTTTTGTGACAGGCAAACAGCACAAGCAGCTGGTACG | 10680 |
| gb:MT106053 | Organism:Severe | TTAGAAGGTAACTTTTATGGACCTTTTGTGACAGGCAAACAGCACAAGCAGCTGGTACG | 10642 |
| gb:MT019533 | Organism:Severe | TTAGAAGGTAACTTTTATGGACCTTTTGTGACAGGCAAACAGCACAAGCAGCTGGTACG | 10642 |
| gb:MT019531 | Organism:Severe | TTAGAAGGTAACTTTTATGGACCTTTTGTGACAGGCAAACAGCACAAGCAGCTGGTACG | 10642 |
| gb:MN996528 | Organism:Severe | TTAGAAGGTAACTTTTATGGACCTTTTGTGACAGGCAAACAGCACAAGCAGCTGGTACG | 10642 |
| gb:MN996530 | Organism:Severe | TTAGAAGGTAACTTTTATGGACCTTTTGTGACAGGCAAACAGCACAAGCAGCTGGTACG | 10628 |
| gb:MN908947 | Organism:Severe | TTAGAAGGTAACTTTTATGGACCTTTTGTGACAGGCAAACAGCACAAGCAGCTGGTACG | 10642 |
| gb:MT019532 | Organism:Severe | TTAGAAGGTAACTTTTATGGACCTTTTGTGACAGGCAAACAGCACAAGCAGCTGGTACG | 10642 |

\*\*\*\*\*

|             |                  |                                                             |       |
|-------------|------------------|-------------------------------------------------------------|-------|
| gb:MT020781 | Organism: Severe | GACACAACATTACAGTTAATGTTTTAGCTTGGTTGTACGCTGCTGTTATAAATGGAGAC | 10690 |
| gb:MT007544 | Organism: Severe | GACACAACATTACAGTTAATGTTTTAGCTTGGTTGTACGCTGCTGTTATAAATGGAGAC | 10702 |
| gb:MN994467 | Organism: Severe | GACACAACATTACAGTTAATGTTTTAGCTTGGTTGTACGCTGCTGTTATAAATGGAGAC | 10702 |
| gb:MT044257 | Organism: Severe | GACACAACATTACAGTTAATGTTTTAGCTTGGTTGTACGCTGCTGTTATAAATGGAGAC | 10702 |
| gb:MT106054 | Organism: Severe | GACACAACATTACAGTTAATGTTTTAGCTTGGTTGTACGCTGCTGTTATAAATGGAGAC | 10702 |
| gb:MT049951 | Organism: Severe | GACACAACATTACAGTTAATGTTTTAGCTTGGTTGTACGCTGCTGTTATAAATGGAGAC | 10702 |
| gb:MN975262 | Organism: Severe | GACACAACATTACAGTTAATGTTTTAGCTTGGTTGTACGCTGCTGTTATAAATGGAGAC | 10702 |
| gb:MT106052 | Organism: Severe | GACACAACATTACAGTTAATGTTTTAGCTTGGTTGTACGCTGCTGTTATAAATGGAGAC | 10702 |
| gb:LC522975 | Organism: Severe | GACACAACATTACAGTTAATGTTTTAGCTTGGTTGTACGCTGCTGTTATAAATGGAGAC | 10699 |
| gb:LC522973 | Organism: Severe | GACACAACATTACAGTTAATGTTTTAGCTTGGTTGTACGCTGCTGTTATAAATGGAGAC | 10699 |
| gb:LC522974 | Organism: Severe | GACACAACATTACAGTTAATGTTTTAGCTTGGTTGTACGCTGCTGTTATAAATGGAGAC | 10699 |
| gb:MN985325 | Organism: Severe | GACACAACATTACAGTTAATGTTTTAGCTTGGTTGTACGCTGCTGTTATAAATGGAGAC | 10702 |
| gb:MT020881 | Organism: Severe | GACACAACATTACAGTTAATGTTTTAGCTTGGTTGTACGCTGCTGTTATAAATGGAGAC | 10702 |
| gb:MT020880 | Organism: Severe | GACACAACATTACAGTTAATGTTTTAGCTTGGTTGTACGCTGCTGTTATAAATGGAGAC | 10702 |
| gb:MT066175 | Organism: Severe | GACACAACATTACAGTTAATGTTTTAGCTTGGTTGTACGCTGCTGTTATAAATGGAGAC | 10702 |
| gb:MN997409 | Organism: Severe | GACACAACATTACAGTTAATGTTTTAGCTTGGTTGTACGCTGCTGTTATAAATGGAGAC | 10702 |
| gb:MN938384 | Organism: Severe | GACACAACATTACAGTTAATGTTTTAGCTTGGTTGTACGCTGCTGTTATAAATGGAGAC | 10670 |
| gb:MT044258 | Organism: Severe | GACACAACATTACAGTTAATGTTTTAGCTTGGTTGTACGCTGCTGTTATAAATGGAGAC | 10678 |
| gb:MT039890 | Organism: Severe | GACACAACATTACAGTTAATGTTTTAGCTTGGTTGTACGCTGCTGTTATAAATGGAGAC | 10702 |
| gb:MN988713 | Organism: Severe | GACACAACATTACAGTTAATGTTTTAGCTTGGTTGTACGCTGCTGTTATAAATGGAGAC | 10702 |
| gb:LC521925 | Organism: Severe | GACACAACATTACAGTTAATGTTTTAGCTTGGTTGTACGCTGCTGTTATAAATGGAGAC | 10675 |
| gb:MT093571 | Organism: Severe | GACACAACATTACAGTTAATGTTTTAGCTTGGTTGTACGCTGCTGTTATAAATGGAGAC | 10702 |
| gb:MT039887 | Organism: Severe | GACACAACATTACAGTTAATGTTTTAGCTTGGTTGTACGCTGCTGTTATAAATGGAGAC | 10702 |
| gb:MT019530 | Organism: Severe | GACACAACATTACAGTTAATGTTTTAGCTTGGTTGTACGCTGCTGTTATAAATGGAGAC | 10702 |
| gb:MT039888 | Organism: Severe | GACACAACATTACAGTTAATGTTTTAGCTTGGTTGTACGCTGCTGTTATAAATGGAGAC | 10702 |
| gb:LC522972 | Organism: Severe | GACACAACATTACAGTTAATGTTTTAGCTTGGTTGTACGCTGCTGTTATAAATGGAGAC | 10699 |
| gb:MT027063 | Organism: Severe | GACACAACATTACAGTTAATGTTTTAGCTTGGTTGTACGCTGCTGTTATAAATGGAGAC | 10702 |
| gb:MT027062 | Organism: Severe | GACACAACATTACAGTTAATGTTTTAGCTTGGTTGTACGCTGCTGTTATAAATGGAGAC | 10702 |
| gb:MT019529 | Organism: Severe | GACACAACATTACAGTTAATGTTTTAGCTTGGTTGTACGCTGCTGTTATAAATGGAGAC | 10702 |
| gb:MN996529 | Organism: Severe | GACACAACATTACAGTTAATGTTTTAGCTTGGTTGTACGCTGCTGTTATAAATGGAGAC | 10690 |
| gb:MN996531 | Organism: Severe | GACACAACATTACAGTTAATGTTTTAGCTTGGTTGTACGCTGCTGTTATAAATGGAGAC | 10689 |
| gb:MT066176 | Organism: Severe | GACACAACATTACAGTTAATGTTTTAGCTTGGTTGTACGCTGCTGTTATAAATGGAGAC | 10702 |
| gb:MT027064 | Organism: Severe | GACACAACATTACAGTTAATGTTTTAGCTTGGTTGTACGCTGCTGTTATAAATGGAGAC | 10702 |
| gb:MN994468 | Organism: Severe | GACACAACATTACAGTTAATGTTTTAGCTTGGTTGTACGCTGCTGTTATAAATGGAGAC | 10702 |
| gb:MT072688 | Organism: Severe | GACACAACATTACAGTTAATGTTTTAGCTTGGTTGTACGCTGCTGTTATAAATGGAGAC | 10687 |
| gb:MN996527 | Organism: Severe | GACACAACATTACAGTTAATGTTTTAGCTTGGTTGTACGCTGCTGTTATAAATGGAGAC | 10669 |
| gb:MT093631 | Organism: Severe | GACACAACATTACAGTTAATGTTTTAGCTTGGTTGTACGCTGCTGTTATAAATGGAGAC | 10740 |
| gb:MT106053 | Organism: Severe | GACACAACATTACAGTTAATGTTTTAGCTTGGTTGTACGCTGCTGTTATAAATGGAGAC | 10702 |
| gb:MT019533 | Organism: Severe | GACACAACATTACAGTTAATGTTTTAGCTTGGTTGTACGCTGCTGTTATAAATGGAGAC | 10702 |
| gb:MT019531 | Organism: Severe | GACACAACATTACAGTTAATGTTTTAGCTTGGTTGTACGCTGCTGTTATAAATGGAGAC | 10702 |
| gb:MN996528 | Organism: Severe | GACACAACATTACAGTTAATGTTTTAGCTTGGTTGTACGCTGCTGTTATAAATGGAGAC | 10702 |
| gb:MN996530 | Organism: Severe | GACACAACATTACAGTTAATGTTTTAGCTTGGTTGTACGCTGCTGTTATAAATGGAGAC | 10688 |
| gb:MN908947 | Organism: Severe | GACACAACATTACAGTTAATGTTTTAGCTTGGTTGTACGCTGCTGTTATAAATGGAGAC | 10702 |
| gb:MT019532 | Organism: Severe | GACACAACATTACAGTTAATGTTTTAGCTTGGTTGTACGCTGCTGTTATAAATGGAGAC | 10702 |

\*\*\*\*\*

|             |                  |                                                               |       |
|-------------|------------------|---------------------------------------------------------------|-------|
| gb:MT020781 | Organism: Severe | AGGTGGTTTCTCAATCGATTTACCACAACCTCTTAATGACTTTAACCTTGTGGCTATGAAG | 10750 |
| gb:MT007544 | Organism: Severe | AGGTGGTTTCTCAATCGATTTACCACAACCTCTTAATGACTTTAACCTTGTGGCTATGAAG | 10762 |
| gb:MN994467 | Organism: Severe | AGGTGGTTTCTCAATCGATTTACCACAACCTCTTAATGACTTTAACCTTGTGGCTATGAAG | 10762 |
| gb:MT044257 | Organism: Severe | AGGTGGTTTCTCAATCGATTTACCACAACCTCTTAATGACTTTAACCTTGTGGCTATGAAG | 10762 |
| gb:MT106054 | Organism: Severe | AGGTGGTTTCTCAATCGATTTACCACAACCTCTTAATGACTTTAACCTTGTGGCTATGAAG | 10762 |
| gb:MT049951 | Organism: Severe | AGGTGGTTTCTCAATCGATTTACCACAACCTCTTAATGACTTTAACCTTGTGGCTATGAAG | 10762 |
| gb:MN975262 | Organism: Severe | AGGTGGTTTCTCAATCGATTTACCACAACCTCTTAATGACTTTAACCTTGTGGCTATGAAG | 10762 |
| gb:MT106052 | Organism: Severe | AGGTGGTTTCTCAATCGATTTACCACAACCTCTTAATGACTTTAACCTTGTGGCTATGAAG | 10762 |
| gb:LC522975 | Organism: Severe | AGGTGGTTTCTCAATCGATTTACCACAACCTCTTAATGACTTTAACCTTGTGGCTATGAAG | 10759 |
| gb:LC522973 | Organism: Severe | AGGTGGTTTCTCAATCGATTTACCACAACCTCTTAATGACTTTAACCTTGTGGCTATGAAG | 10759 |
| gb:LC522974 | Organism: Severe | AGGTGGTTTCTCAATCGATTTACCACAACCTCTTAATGACTTTAACCTTGTGGCTATGAAG | 10759 |
| gb:MN985325 | Organism: Severe | AGGTGGTTTCTCAATCGATTTACCACAACCTCTTAATGACTTTAACCTTGTGGCTATGAAG | 10762 |
| gb:MT020881 | Organism: Severe | AGGTGGTTTCTCAATCGATTTACCACAACCTCTTAATGACTTTAACCTTGTGGCTATGAAG | 10762 |
| gb:MT020880 | Organism: Severe | AGGTGGTTTCTCAATCGATTTACCACAACCTCTTAATGACTTTAACCTTGTGGCTATGAAG | 10762 |
| gb:MT066175 | Organism: Severe | AGGTGGTTTCTCAATCGATTTACCACAACCTCTTAATGACTTTAACCTTGTGGCTATGAAG | 10762 |
| gb:MN997409 | Organism: Severe | AGGTGGTTTCTCAATCGATTTACCACAACCTCTTAATGACTTTAACCTTGTGGCTATGAAG | 10762 |
| gb:MN938384 | Organism: Severe | AGGTGGTTTCTCAATCGATTTACCACAACCTCTTAATGACTTTAACCTTGTGGCTATGAAG | 10730 |



|             |                 |                                                               |       |
|-------------|-----------------|---------------------------------------------------------------|-------|
| gb:MT044258 | Organism:Severe | AGGTGGTTTCTCAATCGATTTACCACAACCTCTTAATGACTTTAACCTTGTGGCTATGAAG | 10738 |
| gb:MT039890 | Organism:Severe | AGGTGGTTTCTCAATCGATTTACCACAACCTCTTAATGACTTTAACCTTGTGGCTATGAAG | 10762 |
| gb:MN988713 | Organism:Severe | AGGTGGTTTCTCAATCGATTTACCACAACCTCTTAATGACTTTAACCTTGTGGCTATGAAG | 10762 |
| gb:LC521925 | Organism:Severe | AGGTGGTTTCTCAATCGATTTACCACAACCTCTTAATGACTTTAACCTTGTGGCTATGAAG | 10735 |
| gb:MT093571 | Organism:Severe | AGGTGGTTTCTCAATCGATTTACCACAACCTCTTAATGACTTTAACCTTGTGGCTATGAAG | 10762 |
| gb:MT039887 | Organism:Severe | AGGTGGTTTCTCAATCGATTTACCACAACCTCTTAATGACTTTAACCTTGTGGCTATGAAG | 10762 |
| gb:MT019530 | Organism:Severe | AGGTGGTTTCTCAATCGATTTACCACAACCTCTTAATGACTTTAACCTTGTGGCTATGAAG | 10762 |
| gb:MT039888 | Organism:Severe | AGGTGGTTTCTCAATCGATTTACCACAACCTCTTAATGACTTTAACCTTGTGGCTATGAAG | 10762 |
| gb:LC522972 | Organism:Severe | AGGTGGTTTCTCAATCGATTTACCACAACCTCTTAATGACTTTAACCTTGTGGCTATGAAG | 10759 |
| gb:MT027063 | Organism:Severe | AGGTGGTTTCTCAATCGATTTACCACAACCTCTTAATGACTTTAACCTTGTGGCTATGAAG | 10762 |
| gb:MT027062 | Organism:Severe | AGGTGGTTTCTCAATCGATTTACCACAACCTCTTAATGACTTTAACCTTGTGGCTATGAAG | 10762 |
| gb:MT019529 | Organism:Severe | AGGTGGTTTCTCAATCGATTTACCACAACCTCTTAATGACTTTAACCTTGTGGCTATGAAG | 10762 |
| gb:MN996529 | Organism:Severe | AGGTGGTTTCTCAATCGATTTACCACAACCTCTTAATGACTTTAACCTTGTGGCTATGAAG | 10750 |
| gb:MN996531 | Organism:Severe | AGGTGGTTTCTCAATCGATTTACCACAACCTCTTAATGACTTTAACCTTGTGGCTATGAAG | 10749 |
| gb:MT066176 | Organism:Severe | AGGTGGTTTCTCAATCGATTTACCACAACCTCTTAATGACTTTAACCTTGTGGCTATGAAG | 10762 |
| gb:MT027064 | Organism:Severe | AGGTGGTTTCTCAATCGATTTACCACAACCTCTTAATGACTTTAACCTTGTGGCTATGAAG | 10762 |
| gb:MN994468 | Organism:Severe | AGGTGGTTTCTCAATCGATTTACCACAACCTCTTAATGACTTTAACCTTGTGGCTATGAAG | 10762 |
| gb:MT072688 | Organism:Severe | AGGTGGTTTCTCAATCGATTTACCACAACCTCTTAATGACTTTAACCTTGTGGCTATGAAG | 10747 |
| gb:MN996527 | Organism:Severe | AGGTGGTTTCTCAATCGATTTACCACAACCTCTTAATGACTTTAACCTTGTGGCTATGAAG | 10729 |
| gb:MT093631 | Organism:Severe | AGGTGGTTTCTCAATCGATTTACCACAACCTCTTAATGACTTTAACCTTGTGGCTATGAAG | 10800 |
| gb:MT106053 | Organism:Severe | AGGTGGTTTCTCAATCGATTTACCACAACCTCTTAATGACTTTAACCTTGTGGCTATGAAG | 10762 |
| gb:MT019533 | Organism:Severe | AGGTGGTTTCTCAATCGATTTACCACAACCTCTTAATGACTTTAACCTTGTGGCTATGAAG | 10762 |
| gb:MT019531 | Organism:Severe | AGGTGGTTTCTCAATCGATTTACCACAACCTCTTAATGACTTTAACCTTGTGGCTATGAAG | 10762 |
| gb:MN996528 | Organism:Severe | AGGTGGTTTCTCAATCGATTTACCACAACCTCTTAATGACTTTAACCTTGTGGCTATGAAG | 10762 |
| gb:MN996530 | Organism:Severe | AGGTGGTTTCTCAATCGATTTACCACAACCTCTTAATGACTTTAACCTTGTGGCTATGAAG | 10748 |
| gb:MN908947 | Organism:Severe | AGGTGGTTTCTCAATCGATTTACCACAACCTCTTAATGACTTTAACCTTGTGGCTATGAAG | 10762 |
| gb:MT019532 | Organism:Severe | AGGTGGTTTCTCAATCGATTTACCACAACCTCTTAATGACTTTAACCTTGTGGCTATGAAG | 10762 |

\*\*\*\*\*

|             |                 |                                                              |       |
|-------------|-----------------|--------------------------------------------------------------|-------|
| gb:MT020781 | Organism:Severe | TACAATTATGAACCTCTAACACAAGACCATGTTGACATACTAGGACCTCTTTCTGCTCAA | 10810 |
| gb:MT007544 | Organism:Severe | TACAATTATGAACCTCTAACACAAGACCATGTTGACATACTAGGACCTCTTTCTGCTCAA | 10822 |
| gb:MN994467 | Organism:Severe | TACAATTATGAACCTCTAACACAAGACCATGTTGACATACTAGGACCTCTTTCTGCTCAA | 10822 |
| gb:MT044257 | Organism:Severe | TACAATTATGAACCTCTAACACAAGACCATGTTGACATACTAGGACCTCTTTCTGCTCAA | 10822 |
| gb:MT106054 | Organism:Severe | TACAATTATGAACCTCTAACACAAGACCATGTTGACATACTAGGACCTCTTTCTGCTCAA | 10822 |
| gb:MT049951 | Organism:Severe | TACAATTATGAACCTCTAACACAAGACCATGTTGACATACTAGGACCTCTTTCTGCTCAA | 10822 |
| gb:MN975262 | Organism:Severe | TACAATTATGAACCTCTAACACAAGACCATGTTGACATACTAGGACCTCTTTCTGCTCAA | 10822 |
| gb:MT106052 | Organism:Severe | TACAATTATGAACCTCTAACACAAGACCATGTTGACATACTAGGACCTCTTTCTGCTCAA | 10822 |
| gb:LC522975 | Organism:Severe | TACAATTATGAACCTCTAACACAAGACCATGTTGACATACTAGGACCTCTTTCTGCTCAA | 10819 |
| gb:LC522973 | Organism:Severe | TACAATTATGAACCTCTAACACAAGACCATGTTGACATACTAGGACCTCTTTCTGCTCAA | 10819 |
| gb:LC522974 | Organism:Severe | TACAATTATGAACCTCTAACACAAGACCATGTTGACATACTAGGACCTCTTTCTGCTCAA | 10819 |
| gb:MN985325 | Organism:Severe | TACAATTATGAACCTCTAACACAAGACCATGTTGACATACTAGGACCTCTTTCTGCTCAA | 10822 |
| gb:MT020881 | Organism:Severe | TACAATTATGAACCTCTAACACAAGACCATGTTGACATACTAGGACCTCTTTCTGCTCAA | 10822 |
| gb:MT020880 | Organism:Severe | TACAATTATGAACCTCTAACACAAGACCATGTTGACATACTAGGACCTCTTTCTGCTCAA | 10822 |
| gb:MT066175 | Organism:Severe | TACAATTATGAACCTCTAACACAAGACCATGTTGACATACTAGGACCTCTTTCTGCTCAA | 10822 |
| gb:MN997409 | Organism:Severe | TACAATTATGAACCTCTAACACAAGACCATGTTGACATACTAGGACCTCTTTCTGCTCAA | 10822 |
| gb:MN938384 | Organism:Severe | TACAATTATGAACCTCTAACACAAGACCATGTTGACATACTAGGACCTCTTTCTGCTCAA | 10790 |
| gb:MT044258 | Organism:Severe | TACAATTATGAACCTCTAACACAAGACCATGTTGACATACTAGGACCTCTTTCTGCTCAA | 10798 |
| gb:MT039890 | Organism:Severe | TACAATTATGAACCTCTAACACAAGACCATGTTGACATACTAGGACCTCTTTCTGCTCAA | 10822 |
| gb:MN988713 | Organism:Severe | TACAATTATGAACCTCTAACACAAGACCATGTTGACATACTAGGACCTCTTTCTGCTCAA | 10822 |
| gb:LC521925 | Organism:Severe | TACAATTATGAACCTCTAACACAAGACCATGTTGACATACTAGGACCTCTTTCTGCTCAA | 10795 |
| gb:MT093571 | Organism:Severe | TACAATTATGAACCTCTAACACAAGACCATGTTGACATACTAGGACCTCTTTCTGCTCAA | 10822 |
| gb:MT039887 | Organism:Severe | TACAATTATGAACCTCTAACACAAGACCATGTTGACATACTAGGACCTCTTTCTGCTCAA | 10822 |
| gb:MT019530 | Organism:Severe | TACAATTATGAACCTCTAACACAAGACCATGTTGACATACTAGGACCTCTTTCTGCTCAA | 10822 |
| gb:MT039888 | Organism:Severe | TACAATTATGAACCTCTAACACAAGACCATGTTGACATACTAGGACCTCTTTCTGCTCAA | 10822 |
| gb:LC522972 | Organism:Severe | TACAATTATGAACCTCTAACACAAGACCATGTTGACATACTAGGACCTCTTTCTGCTCAA | 10819 |
| gb:MT027063 | Organism:Severe | TACAATTATGAACCTCTAACACAAGACCATGTTGACATACTAGGACCTCTTTCTGCTCAA | 10822 |
| gb:MT027062 | Organism:Severe | TACAATTATGAACCTCTAACACAAGACCATGTTGACATACTAGGACCTCTTTCTGCTCAA | 10822 |
| gb:MT019529 | Organism:Severe | TACAATTATGAACCTCTAACACAAGACCATGTTGACATACTAGGACCTCTTTCTGCTCAA | 10822 |
| gb:MN996529 | Organism:Severe | TACAATTATGAACCTCTAACACAAGACCATGTTGACATACTAGGACCTCTTTCTGCTCAA | 10810 |
| gb:MN996531 | Organism:Severe | TACAATTATGAACCTCTAACACAAGACCATGTTGACATACTAGGACCTCTTTCTGCTCAA | 10809 |
| gb:MT066176 | Organism:Severe | TACAATTATGAACCTCTAACACAAGACCATGTTGACATACTAGGACCTCTTTCTGCTCAA | 10822 |
| gb:MT027064 | Organism:Severe | TACAATTATGAACCTCTAACACAAGACCATGTTGACATACTAGGACCTCTTTCTGCTCAA | 10822 |
| gb:MN994468 | Organism:Severe | TACAATTATGAACCTCTAACACAAGACCATGTTGACATACTAGGACCTCTTTCTGCTCAA | 10822 |
| gb:MT072688 | Organism:Severe | TACAATTATGAACCTCTAACACAAGACCATGTTGACATACTAGGACCTCTTTCTGCTCAA | 10807 |
| gb:MN996527 | Organism:Severe | TACAATTATGAACCTCTAACACAAGACCATGTTGACATACTAGGACCTCTTTCTGCTCAA | 10789 |

|             |                 |                                                              |       |
|-------------|-----------------|--------------------------------------------------------------|-------|
| gb:MT093631 | Organism:Severe | TACAATTATGAACCTCTAACACAAGACCATGTTGACATACTAGGACCTCTTTCTGCTCAA | 10860 |
| gb:MT106053 | Organism:Severe | TACAATTATGAACCTCTAACACAAGACCATGTTGACATACTAGGACCTCTTTCTGCTCAA | 10822 |
| gb:MT019533 | Organism:Severe | TACAATTATGAACCTCTAACACAAGACCATGTTGACATACTAGGACCTCTTTCTGCTCAA | 10822 |
| gb:MT019531 | Organism:Severe | TACAATTATGAACCTCTAACACAAGACCATGTTGACATACTAGGACCTCTTTCTGCTCAA | 10822 |
| gb:MN996528 | Organism:Severe | TACAATTATGAACCTCTAACACAAGACCATGTTGACATACTAGGACCTCTTTCTGCTCAA | 10822 |
| gb:MN996530 | Organism:Severe | TACAATTATGAACCTCTAACACAAGACCATGTTGACATACTAGGACCTCTTTCTGCTCAA | 10808 |
| gb:MN908947 | Organism:Severe | TACAATTATGAACCTCTAACACAAGACCATGTTGACATACTAGGACCTCTTTCTGCTCAA | 10822 |
| gb:MT019532 | Organism:Severe | TACAATTATGAACCTCTAACACAAGACCATGTTGACATACTAGGACCTCTTTCTGCTCAA | 10822 |

\*\*\*\*\*

|             |                 |                                                            |       |
|-------------|-----------------|------------------------------------------------------------|-------|
| gb:MT020781 | Organism:Severe | ACTGGAATTGCCGTTTTAGATATGTGTGCTTCATTAAGAATTACTGCAAAATGGTATG | 10870 |
| gb:MT007544 | Organism:Severe | ACTGGAATTGCCGTTTTAGATATGTGTGCTTCATTAAGAATTACTGCAAAATGGTATG | 10882 |
| gb:MN994467 | Organism:Severe | ACTGGAATTGCCGTTTTAGATATGTGTGCTTCATTAAGAATTACTGCAAAATGGTATG | 10882 |
| gb:MT044257 | Organism:Severe | ACTGGAATTGCCGTTTTAGATATGTGTGCTTCATTAAGAATTACTGCAAAATGGTATG | 10882 |
| gb:MT106054 | Organism:Severe | ACTGGAATTGCCGTTTTAGATATGTGTGCTTCATTAAGAATTACTGCAAAATGGTATG | 10882 |
| gb:MT049951 | Organism:Severe | ACTGGAATTGCCGTTTTAGATATGTGTGCTTCATTAAGAATTACTGCAAAATGGTATG | 10882 |
| gb:MN975262 | Organism:Severe | ACTGGAATTGCCGTTTTAGATATGTGTGCTTCATTAAGAATTACTGCAAAATGGTATG | 10882 |
| gb:MT106052 | Organism:Severe | ACTGGAATTGCCGTTTTAGATATGTGTGCTTCATTAAGAATTACTGCAAAATGGTATG | 10882 |
| gb:LC522975 | Organism:Severe | ACTGGAATTGCCGTTTTAGATATGTGTGCTTCATTAAGAATTACTGCAAAATGGTATG | 10879 |
| gb:LC522973 | Organism:Severe | ACTGGAATTGCCGTTTTAGATATGTGTGCTTCATTAAGAATTACTGCAAAATGGTATG | 10879 |
| gb:LC522974 | Organism:Severe | ACTGGAATTGCCGTTTTAGATATGTGTGCTTCATTAAGAATTACTGCAAAATGGTATG | 10879 |
| gb:MN985325 | Organism:Severe | ACTGGAATTGCCGTTTTAGATATGTGTGCTTCATTAAGAATTACTGCAAAATGGTATG | 10882 |
| gb:MT020881 | Organism:Severe | ACTGGAATTGCCGTTTTAGATATGTGTGCTTCATTAAGAATTACTGCAAAATGGTATG | 10882 |
| gb:MT020880 | Organism:Severe | ACTGGAATTGCCGTTTTAGATATGTGTGCTTCATTAAGAATTACTGCAAAATGGTATG | 10882 |
| gb:MT066175 | Organism:Severe | ACTGGAATTGCCGTTTTAGATATGTGTGCTTCATTAAGAATTACTGCAAAATGGTATG | 10882 |
| gb:MN997409 | Organism:Severe | ACTGGAATTGCCGTTTTAGATATGTGTGCTTCATTAAGAATTACTGCAAAATGGTATG | 10882 |
| gb:MN938384 | Organism:Severe | ACTGGAATTGCCGTTTTAGATATGTGTGCTTCATTAAGAATTACTGCAAAATGGTATG | 10850 |
| gb:MT044258 | Organism:Severe | ACTGGAATTGCCGTTTTAGATATGTGTGCTTCATTAAGAATTACTGCAAAATGGTATG | 10858 |
| gb:MT039890 | Organism:Severe | ACTGGAATTGCCGTTTTAGATATGTGTGCTTCATTAAGAATTACTGCAAAATGGTATG | 10882 |
| gb:MN988713 | Organism:Severe | ACTGGAATTGCCGTTTTAGATATGTGTGCTTCATTAAGAATTACTGCAAAATGGTATG | 10882 |
| gb:LC521925 | Organism:Severe | ACTGGAATTGCCGTTTTAGATATGTGTGCTTCATTAAGAATTACTGCAAAATGGTATG | 10855 |
| gb:MT093571 | Organism:Severe | ACTGGAATTGCCGTTTTAGATATGTGTGCTTCATTAAGAATTACTGCAAAATGGTATG | 10882 |
| gb:MT039887 | Organism:Severe | ACTGGAATTGCCGTTTTAGATATGTGTGCTTCATTAAGAATTACTGCAAAATGGTATG | 10882 |
| gb:MT019530 | Organism:Severe | ACTGGAATTGCCGTTTTAGATATGTGTGCTTCATTAAGAATTACTGCAAAATGGTATG | 10882 |
| gb:MT039888 | Organism:Severe | ACTGGAATTGCCGTTTTAGATATGTGTGCTTCATTAAGAATTACTGCAAAATGGTATG | 10882 |
| gb:LC522972 | Organism:Severe | ACTGGAATTGCCGTTTTAGATATGTGTGCTTCATTAAGAATTACTGCAAAATGGTATG | 10879 |
| gb:MT027063 | Organism:Severe | ACTGGAATTGCCGTTTTAGATATGTGTGCTTCATTAAGAATTACTGCAAAATGGTATG | 10882 |
| gb:MT027062 | Organism:Severe | ACTGGAATTGCCGTTTTAGATATGTGTGCTTCATTAAGAATTACTGCAAAATGGTATG | 10882 |
| gb:MT019529 | Organism:Severe | ACTGGAATTGCCGTTTTAGATATGTGTGCTTCATTAAGAATTACTGCAAAATGGTATG | 10882 |
| gb:MN996529 | Organism:Severe | ACTGGAATTGCCGTTTTAGATATGTGTGCTTCATTAAGAATTACTGCAAAATGGTATG | 10870 |
| gb:MN996531 | Organism:Severe | ACTGGAATTGCCGTTTTAGATATGTGTGCTTCATTAAGAATTACTGCAAAATGGTATG | 10869 |
| gb:MT066176 | Organism:Severe | ACTGGAATTGCCGTTTTAGATATGTGTGCTTCATTAAGAATTACTGCAAAATGGTATG | 10882 |
| gb:MT027064 | Organism:Severe | ACTGGAATTGCCGTTTTAGATATGTGTGCTTCATTAAGAATTACTGCAAAATGGTATG | 10882 |
| gb:MN994468 | Organism:Severe | ACTGGAATTGCCGTTTTAGATATGTGTGCTTCATTAAGAATTACTGCAAAATGGTATG | 10882 |
| gb:MT072688 | Organism:Severe | ACTGGAATTGCCGTTTTAGATATGTGTGCTTCATTAAGAATTACTGCAAAATGGTATG | 10867 |
| gb:MN996527 | Organism:Severe | ACTGGAATTGCCGTTTTAGATATGTGTGCTTCATTAAGAATTACTGCAAAATGGTATG | 10849 |
| gb:MT093631 | Organism:Severe | ACTGGAATTGCCGTTTTAGATATGTGTGCTTCATTAAGAATTACTGCAAAATGGTATG | 10920 |
| gb:MT106053 | Organism:Severe | ACTGGAATTGCCGTTTTAGATATGTGTGCTTCATTAAGAATTACTGCAAAATGGTATG | 10882 |
| gb:MT019533 | Organism:Severe | ACTGGAATTGCCGTTTTAGATATGTGTGCTTCATTAAGAATTACTGCAAAATGGTATG | 10882 |
| gb:MT019531 | Organism:Severe | ACTGGAATTGCCGTTTTAGATATGTGTGCTTCATTAAGAATTACTGCAAAATGGTATG | 10882 |
| gb:MN996528 | Organism:Severe | ACTGGAATTGCCGTTTTAGATATGTGTGCTTCATTAAGAATTACTGCAAAATGGTATG | 10882 |
| gb:MN996530 | Organism:Severe | ACTGGAATTGCCGTTTTAGATATGTGTGCTTCATTAAGAATTACTGCAAAATGGTATG | 10868 |
| gb:MN908947 | Organism:Severe | ACTGGAATTGCCGTTTTAGATATGTGTGCTTCATTAAGAATTACTGCAAAATGGTATG | 10882 |
| gb:MT019532 | Organism:Severe | ACTGGAATTGCCGTTTTAGATATGTGTGCTTCATTAAGAATTACTGCAAAATGGTATG | 10882 |

\*\*\*\*\*

|             |                 |                                                              |       |
|-------------|-----------------|--------------------------------------------------------------|-------|
| gb:MT020781 | Organism:Severe | AATGGACGTACCATATTGGGTAGTGTCTTATTAGAAGATGAATTTACACCTTTTGATGTT | 10930 |
| gb:MT007544 | Organism:Severe | AATGGACGTACCATATTGGGTAGTGTCTTATTAGAAGATGAATTTACACCTTTTGATGTT | 10942 |
| gb:MN994467 | Organism:Severe | AATGGACGTACCATATTGGGTAGTGTCTTATTAGAAGATGAATTTACACCTTTTGATGTT | 10942 |
| gb:MT044257 | Organism:Severe | AATGGACGTACCATATTGGGTAGTGTCTTATTAGAAGATGAATTTACACCTTTTGATGTT | 10942 |
| gb:MT106054 | Organism:Severe | AATGGACGTACCATATTGGGTAGTGTCTTATTAGAAGATGAATTTACACCTTTTGATGTT | 10942 |
| gb:MT049951 | Organism:Severe | AATGGACGTACCATATTGGGTAGTGTCTTATTAGAAGATGAATTTACACCTTTTGATGTT | 10942 |
| gb:MN975262 | Organism:Severe | AATGGACGTACCATATTGGGTAGTGTCTTATTAGAAGATGAATTTACACCTTTTGATGTT | 10942 |
| gb:MT106052 | Organism:Severe | AATGGACGTACCATATTGGGTAGTGTCTTATTAGAAGATGAATTTACACCTTTTGATGTT | 10942 |
| gb:LC522975 | Organism:Severe | AATGGACGTACCATATTGGGTAGTGTCTTATTAGAAGATGAATTTACACCTTTTGATGTT | 10939 |

|             |                 |                            |       |
|-------------|-----------------|----------------------------|-------|
| gb:LC522973 | Organism:Severe | AATGGACGTACCATATTGGGTAGTGC | 10939 |
| gb:LC522974 | Organism:Severe | AATGGACGTACCATATTGGGTAGTGC | 10939 |
| gb:MN985325 | Organism:Severe | AATGGACGTACCATATTGGGTAGTGC | 10942 |
| gb:MT020881 | Organism:Severe | AATGGACGTACCATATTGGGTAGTGC | 10942 |
| gb:MT020880 | Organism:Severe | AATGGACGTACCATATTGGGTAGTGC | 10942 |
| gb:MT066175 | Organism:Severe | AATGGACGTACCATATTGGGTAGTGC | 10942 |
| gb:MN997409 | Organism:Severe | AATGGACGTACCATATTGGGTAGTGC | 10942 |
| gb:MN938384 | Organism:Severe | AATGGACGTACCATATTGGGTAGTGC | 10910 |
| gb:MT044258 | Organism:Severe | AATGGACGTACCATATTGGGTAGTGC | 10918 |
| gb:MT039890 | Organism:Severe | AATGGACGTACCATATTGGGTAGTGC | 10942 |
| gb:MN988713 | Organism:Severe | AATGGACGTACCATATTGGGTAGTGC | 10942 |
| gb:LC521925 | Organism:Severe | AATGGACGTACCATATTGGGTAGTGC | 10915 |
| gb:MT093571 | Organism:Severe | AATGGACGTACCATATTGGGTAGTGC | 10942 |
| gb:MT039887 | Organism:Severe | AATGGACGTACCATATTGGGTAGTGC | 10942 |
| gb:MT019530 | Organism:Severe | AATGGACGTACCATATTGGGTAGTGC | 10942 |
| gb:MT039888 | Organism:Severe | AATGGACGTACCATATTGGGTAGTGC | 10942 |
| gb:LC522972 | Organism:Severe | AATGGACGTACCATATTGGGTAGTGC | 10939 |
| gb:MT027063 | Organism:Severe | AATGGACGTACCATATTGGGTAGTGC | 10942 |
| gb:MT027062 | Organism:Severe | AATGGACGTACCATATTGGGTAGTGC | 10942 |
| gb:MT019529 | Organism:Severe | AATGGACGTACCATATTGGGTAGTGC | 10942 |
| gb:MN996529 | Organism:Severe | AATGGACGTACCATATTGGGTAGTGC | 10930 |
| gb:MN996531 | Organism:Severe | AATGGACGTACCATATTGGGTAGTGC | 10929 |
| gb:MT066176 | Organism:Severe | AATGGACGTACCATATTGGGTAGTGC | 10942 |
| gb:MT027064 | Organism:Severe | AATGGACGTACCATATTGGGTAGTGC | 10942 |
| gb:MN994468 | Organism:Severe | AATGGACGTACCATATTGGGTAGTGC | 10942 |
| gb:MT072688 | Organism:Severe | AATGGACGTACCATATTGGGTAGTGC | 10927 |
| gb:MN996527 | Organism:Severe | AATGGACGTACCATATTGGGTAGTGC | 10909 |
| gb:MT093631 | Organism:Severe | AATGGACGTACCATATTGGGTAGTGC | 10980 |
| gb:MT106053 | Organism:Severe | AATGGACGTACCATATTGGGTAGTGC | 10942 |
| gb:MT019533 | Organism:Severe | AATGGACGTACCATATTGGGTAGTGC | 10942 |
| gb:MT019531 | Organism:Severe | AATGGACGTACCATATTGGGTAGTGC | 10942 |
| gb:MN996528 | Organism:Severe | AATGGACGTACCATATTGGGTAGTGC | 10942 |
| gb:MN996530 | Organism:Severe | AATGGACGTACCATATTGGGTAGTGC | 10928 |
| gb:MN908947 | Organism:Severe | AATGGACGTACCATATTGGGTAGTGC | 10942 |
| gb:MT019532 | Organism:Severe | AATGGACGTACCATATTGGGTAGTGC | 10942 |

\*\*\*\*\*

|             |                 |                                       |       |
|-------------|-----------------|---------------------------------------|-------|
| gb:MT020781 | Organism:Severe | GTTAGACAATGCTCAGGTGTTACTTTCAAAGTGCAGT | 10990 |
| gb:MT007544 | Organism:Severe | GTTAGACAATGCTCAGGTGTTACTTTCAAAGTGCAGT | 11002 |
| gb:MN994467 | Organism:Severe | GTTAGACAATGCTCAGGTGTTACTTTCAAAGTGCAGT | 11002 |
| gb:MT044257 | Organism:Severe | GTTAGACAATGCTCAGGTGTTACTTTCAAAGTGCAGT | 11002 |
| gb:MT106054 | Organism:Severe | GTTAGACAATGCTCAGGTGTTACTTTCAAAGTGCAGT | 11002 |
| gb:MT049951 | Organism:Severe | GTTAGACAATGCTCAGGTGTTACTTTCAAAGTGCAGT | 11002 |
| gb:MN975262 | Organism:Severe | GTTAGACAATGCTCAGGTGTTACTTTCAAAGTGCAGT | 11002 |
| gb:MT106052 | Organism:Severe | GTTAGACAATGCTCAGGTGTTACTTTCAAAGTGCAGT | 11002 |
| gb:LC522975 | Organism:Severe | GTTAGACAATGCTCAGGTGTTACTTTCAAAGTGCAGT | 10999 |
| gb:LC522973 | Organism:Severe | GTTAGACAATGCTCAGGTGTTACTTTCAAAGTGCAGT | 10999 |
| gb:LC522974 | Organism:Severe | GTTAGACAATGCTCAGGTGTTACTTTCAAAGTGCAGT | 10999 |
| gb:MN985325 | Organism:Severe | GTTAGACAATGCTCAGGTGTTACTTTCAAAGTGCAGT | 11002 |
| gb:MT020881 | Organism:Severe | GTTAGACAATGCTCAGGTGTTACTTTCAAAGTGCAGT | 11002 |
| gb:MT020880 | Organism:Severe | GTTAGACAATGCTCAGGTGTTACTTTCAAAGTGCAGT | 11002 |
| gb:MT066175 | Organism:Severe | GTTAGACAATGCTCAGGTGTTACTTTCAAAGTGCAGT | 11002 |
| gb:MN997409 | Organism:Severe | GTTAGACAATGCTCAGGTGTTACTTTCAAAGTGCAGT | 11002 |
| gb:MN938384 | Organism:Severe | GTTAGACAATGCTCAGGTGTTACTTTCAAAGTGCAGT | 10970 |
| gb:MT044258 | Organism:Severe | GTTAGACAATGCTCAGGTGTTACTTTCAAAGTGCAGT | 10978 |
| gb:MT039890 | Organism:Severe | GTTAGACAATGCTCAGGTGTTACTTTCAAAGTGCAGT | 11002 |
| gb:MN988713 | Organism:Severe | GTTAGACAATGCTCAGGTGTTACTTTCAAAGTGCAGT | 11002 |
| gb:LC521925 | Organism:Severe | GTTAGACAATGCTCAGGTGTTACTTTCAAAGTGCAGT | 10975 |
| gb:MT093571 | Organism:Severe | GTTAGACAATGCTCAGGTGTTACTTTCAAAGTGCAGT | 11002 |
| gb:MT039887 | Organism:Severe | GTTAGACAATGCTCAGGTGTTACTTTCAAAGTGCAGT | 11002 |
| gb:MT019530 | Organism:Severe | GTTAGACAATGCTCAGGTGTTACTTTCAAAGTGCAGT | 11002 |
| gb:MT039888 | Organism:Severe | GTTAGACAATGCTCAGGTGTTACTTTCAAAGTGCAGT | 11002 |
| gb:LC522972 | Organism:Severe | GTTAGACAATGCTCAGGTGTTACTTTCAAAGTGCAGT | 10999 |
| gb:MT027063 | Organism:Severe | GTTAGACAATGCTCAGGTGTTACTTTCAAAGTGCAGT | 11002 |
| gb:MT027062 | Organism:Severe | GTTAGACAATGCTCAGGTGTTACTTTCAAAGTGCAGT | 11002 |

|             |                 |                                                              |       |
|-------------|-----------------|--------------------------------------------------------------|-------|
| gb:MT019529 | Organism:Severe | GTTAGACAATGCTCAGGTGTTACTTTCCAAAGTGCAGTGAAAAGAACAATCAAGGGTACA | 11002 |
| gb:MN996529 | Organism:Severe | GTTAGACAATGCTCAGGTGTTACTTTCCAAAGTGCAGTGAAAAGAACAATCAAGGGTACA | 10990 |
| gb:MN996531 | Organism:Severe | GTTAGACAATGCTCAGGTGTTACTTTCCAAAGTGCAGTGAAAAGAACAATCAAGGGTACA | 10989 |
| gb:MT066176 | Organism:Severe | GTTAGACAATGCTCAGGTGTTACTTTCCAAAGTGCAGTGAAAAGAACAATCAAGGGTACA | 11002 |
| gb:MT027064 | Organism:Severe | GTTAGACAATGCTCAGGTGTTACTTTCCAAAGTGCAGTGAAAAGAACAATCAAGGGTACA | 11002 |
| gb:MN994468 | Organism:Severe | GTTAGACAATGCTCAGGTGTTACTTTCCAAAGTGCAGTGAAAAGAACAATCAAGGGTACA | 11002 |
| gb:MT072688 | Organism:Severe | GTTAGACAATGCTCAGGTGTTACTTTCCAAAGTGCAGTGAAAAGAACAATCAAGGGTACA | 10987 |
| gb:MN996527 | Organism:Severe | GTTAGACAATGCTCAGGTGTTACTTTCCAAAGTGCAGTGAAAAGAACAATCAAGGGTACA | 10969 |
| gb:MT093631 | Organism:Severe | GTTAGACAATGCTCAGGTGTTACTTTCCAAAGTGCAGTGAAAAGAACAATCAAGGGTACA | 11040 |
| gb:MT106053 | Organism:Severe | GTTAGACAATGCTCAGGTGTTACTTTCCAAAGTGCAGTGAAAAGAACAATCAAGGGTACA | 11002 |
| gb:MT019533 | Organism:Severe | GTTAGACAATGCTCAGGTGTTACTTTCCAAAGTGCAGTGAAAAGAACAATCAAGGGTACA | 11002 |
| gb:MT019531 | Organism:Severe | GTTAGACAATGCTCAGGTGTTACTTTCCAAAGTGCAGTGAAAAGAACAATCAAGGGTACA | 11002 |
| gb:MN996528 | Organism:Severe | GTTAGACAATGCTCAGGTGTTACTTTCCAAAGTGCAGTGAAAAGAACAATCAAGGGTACA | 11002 |
| gb:MN996530 | Organism:Severe | GTTAGACAATGCTCAGGTGTTACTTTCCAAAGTGCAGTGAAAAGAACAATCAAGGGTACA | 10988 |
| gb:MN908947 | Organism:Severe | GTTAGACAATGCTCAGGTGTTACTTTCCAAAGTGCAGTGAAAAGAACAATCAAGGGTACA | 11002 |
| gb:MT019532 | Organism:Severe | GTTAGACAATGCTCAGGTGTTACTTTCCAAAGTGCAGTGAAAAGAACAATCAAGGGTACA | 11002 |

\*\*\*\*\*

|             |                 |                                                              |       |
|-------------|-----------------|--------------------------------------------------------------|-------|
| gb:MT020781 | Organism:Severe | CACCACTGGTTGTTACTCACAATTTTGACTTCACCTTTAGTTTTAGTCCAGAGTACTCAA | 11050 |
| gb:MT007544 | Organism:Severe | CACCACTGGTTGTTACTCACAATTTTGACTTCACCTTTAGTTTTAGTCCAGAGTACTCAA | 11062 |
| gb:MN994467 | Organism:Severe | CACCACTGGTTGTTACTCACAATTTTGACTTCACCTTTAGTTTTAGTCCAGAGTACTCAA | 11062 |
| gb:MT044257 | Organism:Severe | CACCACTGGTTGTTACTCACAATTTTGACTTCACCTTTAGTTTTAGTCCAGAGTACTCAA | 11062 |
| gb:MT106054 | Organism:Severe | CACCACTGGTTGTTACTCACAATTTTGACTTCACCTTTAGTTTTAGTCCAGAGTACTCAA | 11062 |
| gb:MT049951 | Organism:Severe | CACCACTGGTTGTTACTCACAATTTTGACTTCACCTTTAGTTTTAGTCCAGAGTACTCAA | 11062 |
| gb:MN975262 | Organism:Severe | CACCACTGGTTGTTACTCACAATTTTGACTTCACCTTTAGTTTTAGTCCAGAGTACTCAA | 11062 |
| gb:MT106052 | Organism:Severe | CACCACTGGTTGTTACTCACAATTTTGACTTCACCTTTAGTTTTAGTCCAGAGTACTCAA | 11062 |
| gb:LC522975 | Organism:Severe | CACCACTGGTTGTTACTCACAATTTTGACTTCACCTTTAGTTTTAGTCCAGAGTACTCAA | 11059 |
| gb:LC522973 | Organism:Severe | CACCACTGGTTGTTACTCACAATTTTGACTTCACCTTTAGTTTTAGTCCAGAGTACTCAA | 11059 |
| gb:LC522974 | Organism:Severe | CACCACTGGTTGTTACTCACAATTTTGACTTCACCTTTAGTTTTAGTCCAGAGTACTCAA | 11059 |
| gb:MN985325 | Organism:Severe | CACCACTGGTTGTTACTCACAATTTTGACTTCACCTTTAGTTTTAGTCCAGAGTACTCAA | 11062 |
| gb:MT020881 | Organism:Severe | CACCACTGGTTGTTACTCACAATTTTGACTTCACCTTTAGTTTTAGTCCAGAGTACTCAA | 11062 |
| gb:MT020880 | Organism:Severe | CACCACTGGTTGTTACTCACAATTTTGACTTCACCTTTAGTTTTAGTCCAGAGTACTCAA | 11062 |
| gb:MT066175 | Organism:Severe | CACCACTGGTTGTTACTCACAATTTTGACTTCACCTTTAGTTTTAGTCCAGAGTACTCAA | 11062 |
| gb:MN997409 | Organism:Severe | CACCACTGGTTGTTACTCACAATTTTGACTTCACCTTTAGTTTTAGTCCAGAGTACTCAA | 11062 |
| gb:MN938384 | Organism:Severe | CACCACTGGTTGTTACTCACAATTTTGACTTCACCTTTAGTTTTAGTCCAGAGTACTCAA | 11030 |
| gb:MT044258 | Organism:Severe | CACCACTGGTTGTTACTCACAATTTTGACTTCACCTTTAGTTTTAGTCCAGAGTACTCAA | 11038 |
| gb:MT039890 | Organism:Severe | CACCACTGGTTGTTACTCACAATTTTGACTTCACCTTTAGTTTTAGTCCAGAGTACTCAA | 11062 |
| gb:MN988713 | Organism:Severe | CACCACTGGTTGTTACTCACAATTTTGACTTCACCTTTAGTTTTAGTCCAGAGTACTCAA | 11062 |
| gb:LC521925 | Organism:Severe | CACCACTGGTTGTTACTCACAATTTTGACTTCACCTTTAGTTTTAGTCCAGAGTACTCAA | 11035 |
| gb:MT093571 | Organism:Severe | CACCACTGGTTGTTACTCACAATTTTGACTTCACCTTTAGTTTTAGTCCAGAGTACTCAA | 11062 |
| gb:MT039887 | Organism:Severe | CACCACTGGTTGTTACTCACAATTTTGACTTCACCTTTAGTTTTAGTCCAGAGTACTCAA | 11062 |
| gb:MT019530 | Organism:Severe | CACCACTGGTTGTTACTCACAATTTTGACTTCACCTTTAGTTTTAGTCCAGAGTACTCAA | 11062 |
| gb:MT039888 | Organism:Severe | CACCACTGGTTGTTACTCACAATTTTGACTTCACCTTTAGTTTTAGTCCAGAGTACTCAA | 11062 |
| gb:LC522972 | Organism:Severe | CACCACTGGTTGTTACTCACAATTTTGACTTCACCTTTAGTTTTAGTCCAGAGTACTCAA | 11059 |
| gb:MT027063 | Organism:Severe | CACCACTGGTTGTTACTCACAATTTTGACTTCACCTTTAGTTTTAGTCCAGAGTACTCAA | 11062 |
| gb:MT027062 | Organism:Severe | CACCACTGGTTGTTACTCACAATTTTGACTTCACCTTTAGTTTTAGTCCAGAGTACTCAA | 11062 |
| gb:MT019529 | Organism:Severe | CACCACTGGTTGTTACTCACAATTTTGACTTCACCTTTAGTTTTAGTCCAGAGTACTCAA | 11062 |
| gb:MN996529 | Organism:Severe | CACCACTGGTTGTTACTCACAATTTTGACTTCACCTTTAGTTTTAGTCCAGAGTACTCAA | 11050 |
| gb:MN996531 | Organism:Severe | CACCACTGGTTGTTACTCACAATTTTGACTTCACCTTTAGTTTTAGTCCAGAGTACTCAA | 11049 |
| gb:MT066176 | Organism:Severe | CACCACTGGTTGTTACTCACAATTTTGACTTCACCTTTAGTTTTAGTCCAGAGTACTCAA | 11062 |
| gb:MT027064 | Organism:Severe | CACCACTGGTTGTTACTCACAATTTTGACTTCACCTTTAGTTTTAGTCCAGAGTACTCAA | 11062 |
| gb:MN994468 | Organism:Severe | CACCACTGGTTGTTACTCACAATTTTGACTTCACCTTTAGTTTTAGTCCAGAGTACTCAA | 11062 |
| gb:MT072688 | Organism:Severe | CACCACTGGTTGTTACTCACAATTTTGACTTCACCTTTAGTTTTAGTCCAGAGTACTCAA | 11047 |
| gb:MN996527 | Organism:Severe | CACCACTGGTTGTTACTCACAATTTTGACTTCACCTTTAGTTTTAGTCCAGAGTACTCAA | 11029 |
| gb:MT093631 | Organism:Severe | CACCACTGGTTGTTACTCACAATTTTGACTTCACCTTTAGTTTTAGTCCAGAGTACTCAA | 11100 |
| gb:MT106053 | Organism:Severe | CACCACTGGTTGTTACTCACAATTTTGACTTCACCTTTAGTTTTAGTCCAGAGTACTCAA | 11062 |
| gb:MT019533 | Organism:Severe | CACCACTGGTTGTTACTCACAATTTTGACTTCACCTTTAGTTTTAGTCCAGAGTACTCAA | 11062 |
| gb:MT019531 | Organism:Severe | CACCACTGGTTGTTACTCACAATTTTGACTTCACCTTTAGTTTTAGTCCAGAGTACTCAA | 11062 |
| gb:MN996528 | Organism:Severe | CACCACTGGTTGTTACTCACAATTTTGACTTCACCTTTAGTTTTAGTCCAGAGTACTCAA | 11062 |
| gb:MN996530 | Organism:Severe | CACCACTGGTTGTTACTCACAATTTTGACTTCACCTTTAGTTTTAGTCCAGAGTACTCAA | 11048 |
| gb:MN908947 | Organism:Severe | CACCACTGGTTGTTACTCACAATTTTGACTTCACCTTTAGTTTTAGTCCAGAGTACTCAA | 11062 |
| gb:MT019532 | Organism:Severe | CACCACTGGTTGTTACTCACAATTTTGACTTCACCTTTAGTTTTAGTCCAGAGTACTCAA | 11062 |

\*\*\*\*\*

|             |                 |                                                             |       |
|-------------|-----------------|-------------------------------------------------------------|-------|
| gb:MT020781 | Organism:Severe | TGGTCTTTGTTCTTTTTTTTGTATGAAAATGCCTTTTACCTTTTGCTATGGGTATTATT | 11110 |
|-------------|-----------------|-------------------------------------------------------------|-------|



|             |                 |                                                             |       |
|-------------|-----------------|-------------------------------------------------------------|-------|
| gb:LC521925 | Organism:Severe | GCTATGCTGCTTTTGAATGATGTTTGTCAAACATAAAGCATGCATTTCTCTGTTTGTTT | 11155 |
| gb:MT093571 | Organism:Severe | GCTATGCTGCTTTTGAATGATGTTTGTCAAACATAAAGCATGCATTTCTCTGTTTGTTT | 11182 |
| gb:MT039887 | Organism:Severe | GCTATGCTGCTTTTGAATGATGTTTGTCAAACATAAAGCATGCATTTCTCTGTTTGTTT | 11182 |
| gb:MT019530 | Organism:Severe | GCTATGCTGCTTTTGAATGATGTTTGTCAAACATAAAGCATGCATTTCTCTGTTTGTTT | 11182 |
| gb:MT039888 | Organism:Severe | GCTATGCTGCTTTTGAATGATGTTTGTCAAACATAAAGCATGCATTTCTCTGTTTGTTT | 11182 |
| gb:LC522972 | Organism:Severe | GCTATGCTGCTTTTGAATGATGTTTGTCAAACATAAAGCATGCATTTCTCTGTTTGTTT | 11179 |
| gb:MT027063 | Organism:Severe | GCTATGCTGCTTTTGAATGATGTTTGTCAAACATAAAGCATGCATTTCTCTGTTTGTTT | 11182 |
| gb:MT027062 | Organism:Severe | GCTATGCTGCTTTTGAATGATGTTTGTCAAACATAAAGCATGCATTTCTCTGTTTGTTT | 11182 |
| gb:MT019529 | Organism:Severe | GCTATGCTGCTTTTGAATGATGTTTGTCAAACATAAAGCATGCATTTCTCTGTTTGTTT | 11182 |
| gb:MN996529 | Organism:Severe | GCTATGCTGCTTTTGAATGATGTTTGTCAAACATAAAGCATGCATTTCTCTGTTTGTTT | 11170 |
| gb:MN996531 | Organism:Severe | GCTATGCTGCTTTTGAATGATGTTTGTCAAACATAAAGCATGCATTTCTCTGTTTGTTT | 11169 |
| gb:MT066176 | Organism:Severe | GCTATGCTGCTTTTGAATGATGTTTGTCAAACATAAAGCATGCATTTCTCTGTTTGTTT | 11182 |
| gb:MT027064 | Organism:Severe | GCTATGCTGCTTTTGAATGATGTTTGTCAAACATAAAGCATGCATTTCTCTGTTTGTTT | 11182 |
| gb:MN994468 | Organism:Severe | GCTATGCTGCTTTTGAATGATGTTTGTCAAACATAAAGCATGCATTTCTCTGTTTGTTT | 11182 |
| gb:MT072688 | Organism:Severe | GCTATGCTGCTTTTGAATGATGTTTGTCAAACATAAAGCATGCATTTCTCTGTTTGTTT | 11167 |
| gb:MN996527 | Organism:Severe | GCTATGCTGCTTTTGAATGATGTTTGTCAAACATAAAGCATGCATTTCTCTGTTTGTTT | 11149 |
| gb:MT093631 | Organism:Severe | GCTATGCTGCTTTTGAATGATGTTTGTCAAACATAAAGCATGCATTTCTCTGTTTGTTT | 11220 |
| gb:MT106053 | Organism:Severe | GCTATGCTGCTTTTGAATGATGTTTGTCAAACATAAAGCATGCATTTCTCTGTTTGTTT | 11182 |
| gb:MT019533 | Organism:Severe | GCTATGCTGCTTTTGAATGATGTTTGTCAAACATAAAGCATGCATTTCTCTGTTTGTTT | 11182 |
| gb:MT019531 | Organism:Severe | GCTATGCTGCTTTTGAATGATGTTTGTCAAACATAAAGCATGCATTTCTCTGTTTGTTT | 11182 |
| gb:MN996528 | Organism:Severe | GCTATGCTGCTTTTGAATGATGTTTGTCAAACATAAAGCATGCATTTCTCTGTTTGTTT | 11182 |
| gb:MN996530 | Organism:Severe | GCTATGCTGCTTTTGAATGATGTTTGTCAAACATAAAGCATGCATTTCTCTGTTTGTTT | 11168 |
| gb:MN908947 | Organism:Severe | GCTATGCTGCTTTTGAATGATGTTTGTCAAACATAAAGCATGCATTTCTCTGTTTGTTT | 11182 |
| gb:MT019532 | Organism:Severe | GCTATGCTGCTTTTGAATGATGTTTGTCAAACATAAAGCATGCATTTCTCTGTTTGTTT | 11182 |

\*\*\*\*\*

|             |                 |                                                              |       |
|-------------|-----------------|--------------------------------------------------------------|-------|
| gb:MT020781 | Organism:Severe | TTGTTACCTTCTCTTGCCACTGTAGCTTATTTTAATATGGTCTATATGCCTGCTAGTTGG | 11230 |
| gb:MT007544 | Organism:Severe | TTGTTACCTTCTCTTGCCACTGTAGCTTATTTTAATATGGTCTATATGCCTGCTAGTTGG | 11242 |
| gb:MN994467 | Organism:Severe | TTGTTACCTTCTCTTGCCACTGTAGCTTATTTTAATATGGTCTATATGCCTGCTAGTTGG | 11242 |
| gb:MT044257 | Organism:Severe | TTGTTACCTTCTCTTGCCACTGTAGCTTATTTTAATATGGTCTATATGCCTGCTAGTTGG | 11242 |
| gb:MT106054 | Organism:Severe | TTGTTACCTTCTCTTGCCACTGTAGCTTATTTTAATATGGTCTATATGCCTGCTAGTTGG | 11242 |
| gb:MT049951 | Organism:Severe | TTGTTACCTTCTCTTGCCACTGTAGCTTATTTTAATATGGTCTATATGCCTGCTAGTTGG | 11242 |
| gb:MN975262 | Organism:Severe | TTGTTACCTTCTCTTGCCACTGTAGCTTATTTTAATATGGTCTATATGCCTGCTAGTTGG | 11242 |
| gb:MT106052 | Organism:Severe | TTGTTACCTTCTCTTGCCACTGTAGCTTATTTTAATATGGTCTATATGCCTGCTAGTTGG | 11242 |
| gb:LC522975 | Organism:Severe | TTGTTACCTTCTCTTGCCACTGTAGCTTATTTTAATATGGTCTATATGCCTGCTAGTTGG | 11239 |
| gb:LC522973 | Organism:Severe | TTGTTACCTTCTCTTGCCACTGTAGCTTATTTTAATATGGTCTATATGCCTGCTAGTTGG | 11239 |
| gb:LC522974 | Organism:Severe | TTGTTACCTTCTCTTGCCACTGTAGCTTATTTTAATATGGTCTATATGCCTGCTAGTTGG | 11239 |
| gb:MN985325 | Organism:Severe | TTGTTACCTTCTCTTGCCACTGTAGCTTATTTTAATATGGTCTATATGCCTGCTAGTTGG | 11242 |
| gb:MT020881 | Organism:Severe | TTGTTACCTTCTCTTGCCACTGTAGCTTATTTTAATATGGTCTATATGCCTGCTAGTTGG | 11242 |
| gb:MT020880 | Organism:Severe | TTGTTACCTTCTCTTGCCACTGTAGCTTATTTTAATATGGTCTATATGCCTGCTAGTTGG | 11242 |
| gb:MT066175 | Organism:Severe | TTGTTACCTTCTCTTGCCACTGTAGCTTATTTTAATATGGTCTATATGCCTGCTAGTTGG | 11242 |
| gb:MN997409 | Organism:Severe | TTGTTACCTTCTCTTGCCACTGTAGCTTATTTTAATATGGTCTATATGCCTGCTAGTTGG | 11242 |
| gb:MN938384 | Organism:Severe | TTGTTACCTTCTCTTGCCACTGTAGCTTATTTTAATATGGTCTATATGCCTGCTAGTTGG | 11210 |
| gb:MT044258 | Organism:Severe | TTGTTACCTTCTCTTGCCACTGTAGCTTATTTTAATATGGTCTATATGCCTGCTAGTTGG | 11218 |
| gb:MT039890 | Organism:Severe | TTGTTACCTTCTCTTGCCACTGTAGCTTATTTTAATATGGTCTATATGCCTGCTAGTTGG | 11242 |
| gb:MN988713 | Organism:Severe | TTGTTACCTTCTCTTGCCACTGTAGCTTATTTTAATATGGTCTATATGCCTGCTAGTTGG | 11242 |
| gb:LC521925 | Organism:Severe | TTGTTACCTTCTCTTGCCACTGTAGCTTATTTTAATATGGTCTATATGCCTGCTAGTTGG | 11215 |
| gb:MT093571 | Organism:Severe | TTGTTACCTTCTCTTGCCACTGTAGCTTATTTTAATATGGTCTATATGCCTGCTAGTTGG | 11242 |
| gb:MT039887 | Organism:Severe | TTGTTACCTTCTCTTGCCACTGTAGCTTATTTTAATATGGTCTATATGCCTGCTAGTTGG | 11242 |
| gb:MT019530 | Organism:Severe | TTGTTACCTTCTCTTGCCACTGTAGCTTATTTTAATATGGTCTATATGCCTGCTAGTTGG | 11242 |
| gb:MT039888 | Organism:Severe | TTGTTACCTTCTCTTGCCACTGTAGCTTATTTTAATATGGTCTATATGCCTGCTAGTTGG | 11242 |
| gb:LC522972 | Organism:Severe | TTGTTACCTTCTCTTGCCACTGTAGCTTATTTTAATATGGTCTATATGCCTGCTAGTTGG | 11239 |
| gb:MT027063 | Organism:Severe | TTGTTACCTTCTCTTGCCACTGTAGCTTATTTTAATATGGTCTATATGCCTGCTAGTTGG | 11242 |
| gb:MT027062 | Organism:Severe | TTGTTACCTTCTCTTGCCACTGTAGCTTATTTTAATATGGTCTATATGCCTGCTAGTTGG | 11242 |
| gb:MT019529 | Organism:Severe | TTGTTACCTTCTCTTGCCACTGTAGCTTATTTTAATATGGTCTATATGCCTGCTAGTTGG | 11242 |
| gb:MN996529 | Organism:Severe | TTGTTACCTTCTCTTGCCACTGTAGCTTATTTTAATATGGTCTATATGCCTGCTAGTTGG | 11230 |
| gb:MN996531 | Organism:Severe | TTGTTACCTTCTCTTGCCACTGTAGCTTATTTTAATATGGTCTATATGCCTGCTAGTTGG | 11229 |
| gb:MT066176 | Organism:Severe | TTGTTACCTTCTCTTGCCACTGTAGCTTATTTTAATATGGTCTATATGCCTGCTAGTTGG | 11242 |
| gb:MT027064 | Organism:Severe | TTGTTACCTTCTCTTGCCACTGTAGCTTATTTTAATATGGTCTATATGCCTGCTAGTTGG | 11242 |
| gb:MN994468 | Organism:Severe | TTGTTACCTTCTCTTGCCACTGTAGCTTATTTTAATATGGTCTATATGCCTGCTAGTTGG | 11242 |
| gb:MT072688 | Organism:Severe | TTGTTACCTTCTCTTGCCACTGTAGCTTATTTTAATATGGTCTATATGCCTGCTAGTTGG | 11227 |
| gb:MN996527 | Organism:Severe | TTGTTACCTTCTCTTGCCACTGTAGCTTATTTTAATATGGTCTATATGCCTGCTAGTTGG | 11209 |
| gb:MT093631 | Organism:Severe | TTGTTACCTTCTCTTGCCACTGTAGCTTATTTTAATATGGTCTATATGCCTGCTAGTTGG | 11280 |
| gb:MT106053 | Organism:Severe | TTGTTACCTTCTCTTGCCACTGTAGCTTATTTTAATATGGTCTATATGCCTGCTAGTTGG | 11242 |
| gb:MT019533 | Organism:Severe | TTGTTACCTTCTCTTGCCACTGTAGCTTATTTTAATATGGTCTATATGCCTGCTAGTTGG | 11242 |

|             |                 |                                                               |       |
|-------------|-----------------|---------------------------------------------------------------|-------|
| gb:MT019531 | Organism:Severe | TTGTTACCTTCTCTGGCCACTGTAGCTTATTTTAAATATGGTCTATATGCCTGCTAGTTGG | 11242 |
| gb:MN996528 | Organism:Severe | TTGTTACCTTCTCTGGCCACTGTAGCTTATTTTAAATATGGTCTATATGCCTGCTAGTTGG | 11242 |
| gb:MN996530 | Organism:Severe | TTGTTACCTTCTCTGGCCACTGTAGCTTATTTTAAATATGGTCTATATGCCTGCTAGTTGG | 11228 |
| gb:MN908947 | Organism:Severe | TTGTTACCTTCTCTGGCCACTGTAGCTTATTTTAAATATGGTCTATATGCCTGCTAGTTGG | 11242 |
| gb:MT019532 | Organism:Severe | TTGTTACCTTCTCTGGCCACTGTAGCTTATTTTAAATATGGTCTATATGCCTGCTAGTTGG | 11242 |

\*\*\*\*\*

|             |                 |                                                              |       |
|-------------|-----------------|--------------------------------------------------------------|-------|
| gb:MT020781 | Organism:Severe | GTGATGCGTATTATGACATGGTTGGATATGGTTGATACTAGTTTGTCTGGTTTTAAGCTA | 11290 |
| gb:MT007544 | Organism:Severe | GTGATGCGTATTATGACATGGTTGGATATGGTTGATACTAGTTTGTCTGGTTTTAAGCTA | 11302 |
| gb:MN994467 | Organism:Severe | GTGATGCGTATTATGACATGGTTGGATATGGTTGATACTAGTTTGTCTGGTTTTAAGCTA | 11302 |
| gb:MT044257 | Organism:Severe | GTGATGCGTATTATGACATGGTTGGATATGGTTGATACTAGTTTGTCTGGTTTTAAGCTA | 11302 |
| gb:MT106054 | Organism:Severe | GTGATGCGTATTATGACATGGTTGGATATGGTTGATACTAGTTTGTCTGGTTTTAAGCTA | 11302 |
| gb:MT049951 | Organism:Severe | GTGATGCGTATTATGACATGGTTGGATATGGTTGATACTAGTTTGTCTGGTTTTAAGCTA | 11302 |
| gb:MN975262 | Organism:Severe | GTGATGCGTATTATGACATGGTTGGATATGGTTGATACTAGTTTGTCTGGTTTTAAGCTA | 11302 |
| gb:MT106052 | Organism:Severe | GTGATGCGTATTATGACATGGTTGGATATGGTTGATACTAGTTTGTCTGGTTTTAAGCTA | 11302 |
| gb:LC522975 | Organism:Severe | GTGATGCGTATTATGACATGGTTGGATATGGTTGATACTAGTTTGTCTGGTTTTAAGCTA | 11299 |
| gb:LC522973 | Organism:Severe | GTGATGCGTATTATGACATGGTTGGATATGGTTGATACTAGTTTGTCTGGTTTTAAGCTA | 11299 |
| gb:LC522974 | Organism:Severe | GTGATGCGTATTATGACATGGTTGGATATGGTTGATACTAGTTTGTCTGGTTTTAAGCTA | 11299 |
| gb:MN985325 | Organism:Severe | GTGATGCGTATTATGACATGGTTGGATATGGTTGATACTAGTTTGTCTGGTTTTAAGCTA | 11302 |
| gb:MT020881 | Organism:Severe | GTGATGCGTATTATGACATGGTTGGATATGGTTGATACTAGTTTGTCTGGTTTTAAGCTA | 11302 |
| gb:MT020880 | Organism:Severe | GTGATGCGTATTATGACATGGTTGGATATGGTTGATACTAGTTTGTCTGGTTTTAAGCTA | 11302 |
| gb:MT066175 | Organism:Severe | GTGATGCGTATTATGACATGGTTGGATATGGTTGATACTAGTTTGTCTGGTTTTAAGCTA | 11302 |
| gb:MN997409 | Organism:Severe | GTGATGCGTATTATGACATGGTTGGATATGGTTGATACTAGTTTGTCTGGTTTTAAGCTA | 11302 |
| gb:MN938384 | Organism:Severe | GTGATGCGTATTATGACATGGTTGGATATGGTTGATACTAGTTTGTCTGGTTTTAAGCTA | 11270 |
| gb:MT044258 | Organism:Severe | GTGATGCGTATTATGACATGGTTGGATATGGTTGATACTAGTTTGTCTGGTTTTAAGCTA | 11278 |
| gb:MT039890 | Organism:Severe | GTGATGCGTATTATGACATGGTTGGATATGGTTGATACTAGTTTGTCTGGTTTTAAGCTA | 11302 |
| gb:MN988713 | Organism:Severe | GTGATGCGTATTATGACATGGTTGGATATGGTTGATACTAGTTTGTCTGGTTTTAAGCTA | 11302 |
| gb:LC521925 | Organism:Severe | GTGATGCGTATTATGACATGGTTGGATATGGTTGATACTAGTTTGTCTGGTTTTAAGCTA | 11275 |
| gb:MT093571 | Organism:Severe | GTGATGCGTATTATGACATGGTTGGATATGGTTGATACTAGTTTGTCTGGTTTTAAGCTA | 11302 |
| gb:MT039887 | Organism:Severe | GTGATGCGTATTATGACATGGTTGGATATGGTTGATACTAGTTTGTCTGGTTTTAAGCTA | 11302 |
| gb:MT019530 | Organism:Severe | GTGATGCGTATTATGACATGGTTGGATATGGTTGATACTAGTTTGTCTGGTTTTAAGCTA | 11302 |
| gb:MT039888 | Organism:Severe | GTGATGCGTATTATGACATGGTTGGATATGGTTGATACTAGTTTGTCTGGTTTTAAGCTA | 11302 |
| gb:LC522972 | Organism:Severe | GTGATGCGTATTATGACATGGTTGGATATGGTTGATACTAGTTTGTCTGGTTTTAAGCTA | 11299 |
| gb:MT027063 | Organism:Severe | GTGATGCGTATTATGACATGGTTGGATATGGTTGATACTAGTTTGTCTGGTTTTAAGCTA | 11302 |
| gb:MT027062 | Organism:Severe | GTGATGCGTATTATGACATGGTTGGATATGGTTGATACTAGTTTGTCTGGTTTTAAGCTA | 11302 |
| gb:MT019529 | Organism:Severe | GTGATGCGTATTATGACATGGTTGGATATGGTTGATACTAGTTTGTCTGGTTTTAAGCTA | 11302 |
| gb:MN996529 | Organism:Severe | GTGATGCGTATTATGACATGGTTGGATATGGTTGATACTAGTTTGTCTGGTTTTAAGCTA | 11290 |
| gb:MN996531 | Organism:Severe | GTGATGCGTATTATGACATGGTTGGATATGGTTGATACTAGTTTGTCTGGTTTTAAGCTA | 11289 |
| gb:MT066176 | Organism:Severe | GTGATGCGTATTATGACATGGTTGGATATGGTTGATACTAGTTTGTCTGGTTTTAAGCTA | 11302 |
| gb:MT027064 | Organism:Severe | GTGATGCGTATTATGACATGGTTGGATATGGTTGATACTAGTTTGTCTGGTTTTAAGCTA | 11302 |
| gb:MN994468 | Organism:Severe | GTGATGCGTATTATGACATGGTTGGATATGGTTGATACTAGTTTGTCTGGTTTTAAGCTA | 11302 |
| gb:MT072688 | Organism:Severe | GTGATGCGTATTATGACATGGTTGGATATGGTTGATACTAGTTTGTCTGGTTTTAAGCTA | 11287 |
| gb:MN996527 | Organism:Severe | GTGATGCGTATTATGACATGGTTGGATATGGTTGATACTAGTTTGTCTGGTTTTAAGCTA | 11269 |
| gb:MT093631 | Organism:Severe | GTGATGCGTATTATGACATGGTTGGATATGGTTGATACTAGTTTGTCTGGTTTTAAGCTA | 11340 |
| gb:MT106053 | Organism:Severe | GTGATGCGTATTATGACATGGTTGGATATGGTTGATACTAGTTTGTCTGGTTTTAAGCTA | 11302 |
| gb:MT019533 | Organism:Severe | GTGATGCGTATTATGACATGGTTGGATATGGTTGATACTAGTTTGTCTGGTTTTAAGCTA | 11302 |
| gb:MT019531 | Organism:Severe | GTGATGCGTATTATGACATGGTTGGATATGGTTGATACTAGTTTGTCTGGTTTTAAGCTA | 11302 |
| gb:MN996528 | Organism:Severe | GTGATGCGTATTATGACATGGTTGGATATGGTTGATACTAGTTTGTCTGGTTTTAAGCTA | 11302 |
| gb:MN996530 | Organism:Severe | GTGATGCGTATTATGACATGGTTGGATATGGTTGATACTAGTTTGTCTGGTTTTAAGCTA | 11288 |
| gb:MN908947 | Organism:Severe | GTGATGCGTATTATGACATGGTTGGATATGGTTGATACTAGTTTGTCTGGTTTTAAGCTA | 11302 |
| gb:MT019532 | Organism:Severe | GTGATGCGTATTATGACATGGTTGGATATGGTTGATACTAGTTTGTCTGGTTTTAAGCTA | 11302 |

\*\*\*\*\*

|             |                 |                                                             |       |
|-------------|-----------------|-------------------------------------------------------------|-------|
| gb:MT020781 | Organism:Severe | AAAGACTGTGTTATGTATGCATCAGCTGTAGTGTACTAATCCTTATGACAGCAAGAACT | 11350 |
| gb:MT007544 | Organism:Severe | AAAGACTGTGTTATGTATGCATCAGCTGTAGTGTACTAATCCTTATGACAGCAAGAACT | 11362 |
| gb:MN994467 | Organism:Severe | AAAGACTGTGTTATGTATGCATCAGCTGTAGTGTACTAATCCTTATGACAGCAAGAACT | 11362 |
| gb:MT044257 | Organism:Severe | AAAGACTGTGTTATGTATGCATCAGCTGTAGTGTACTAATCCTTATGACAGCAAGAACT | 11362 |
| gb:MT106054 | Organism:Severe | AAAGACTGTGTTATGTATGCATCAGCTGTAGTGTACTAATCCTTATGACAGCAAGAACT | 11362 |
| gb:MT049951 | Organism:Severe | AAAGACTGTGTTATGTATGCATCAGCTGTAGTGTACTAATCCTTATGACAGCAAGAACT | 11362 |
| gb:MN975262 | Organism:Severe | AAAGACTGTGTTATGTATGCATCAGCTGTAGTGTACTAATCCTTATGACAGCAAGAACT | 11362 |
| gb:MT106052 | Organism:Severe | AAAGACTGTGTTATGTATGCATCAGCTGTAGTGTACTAATCCTTATGACAGCAAGAACT | 11362 |
| gb:LC522975 | Organism:Severe | AAAGACTGTGTTATGTATGCATCAGCTGTAGTGTACTAATCCTTATGACAGCAAGAACT | 11359 |
| gb:LC522973 | Organism:Severe | AAAGACTGTGTTATGTATGCATCAGCTGTAGTGTACTAATCCTTATGACAGCAAGAACT | 11359 |
| gb:LC522974 | Organism:Severe | AAAGACTGTGTTATGTATGCATCAGCTGTAGTGTACTAATCCTTATGACAGCAAGAACT | 11359 |
| gb:MN985325 | Organism:Severe | AAAGACTGTGTTATGTATGCATCAGCTGTAGTGTACTAATCCTTATGACAGCAAGAACT | 11362 |





|             |                 |                                                               |       |
|-------------|-----------------|---------------------------------------------------------------|-------|
| gb:MT066176 | Organism:Severe | GTGTATGATGATGGTGTCTAGGAGAGTGTGGACACTTATGAATGTCTTGACACTCGTTTAT | 11422 |
| gb:MT027064 | Organism:Severe | GTGTATGATGATGGTGTCTAGGAGAGTGTGGACACTTATGAATGTCTTGACACTCGTTTAT | 11422 |
| gb:MN994468 | Organism:Severe | GTGTATGATGATGGTGTCTAGGAGAGTGTGGACACTTATGAATGTCTTGACACTCGTTTAT | 11422 |
| gb:MT072688 | Organism:Severe | GTGTATGATGATGGTGTCTAGGAGAGTGTGGACACTTATGAATGTCTTGACACTCGTTTAT | 11407 |
| gb:MN996527 | Organism:Severe | GTGTATGATGATGGTGTCTAGGAGAGTGTGGACACTTATGAATGTCTTGACACTCGTTTAT | 11389 |
| gb:MT093631 | Organism:Severe | GTGTATGATGATGGTGTCTAGGAGAGTGTGGACACTTATGAATGTCTTGACACTCGTTTAT | 11460 |
| gb:MT106053 | Organism:Severe | GTGTATGATGATGGTGTCTAGGAGAGTGTGGACACTTATGAATGTCTTGACACTCGTTTAT | 11422 |
| gb:MT019533 | Organism:Severe | GTGTATGATGATGGTGTCTAGGAGAGTGTGGACACTTATGAATGTCTTGACACTCGTTTAT | 11422 |
| gb:MT019531 | Organism:Severe | GTGTATGATGATGGTGTCTAGGAGAGTGTGGACACTTATGAATGTCTTGACACTCGTTTAT | 11422 |
| gb:MN996528 | Organism:Severe | GTGTATGATGATGGTGTCTAGGAGAGTGTGGACACTTATGAATGTCTTGACACTCGTTTAT | 11422 |
| gb:MN996530 | Organism:Severe | GTGTATGATGATGGTGTCTAGGAGAGTGTGGACACTTATGAATGTCTTGACACTCGTTTAT | 11408 |
| gb:MN908947 | Organism:Severe | GTGTATGATGATGGTGTCTAGGAGAGTGTGGACACTTATGAATGTCTTGACACTCGTTTAT | 11422 |
| gb:MT019532 | Organism:Severe | GTGTATGATGATGGTGTCTAGGAGAGTGTGGACACTTATGAATGTCTTGACACTCGTTTAT | 11422 |

\*\*\*\*\*

|             |                 |                                                              |       |
|-------------|-----------------|--------------------------------------------------------------|-------|
| gb:MT020781 | Organism:Severe | AAAGTTTATTATGGTAATGCTTTAGATCAAGCCATTTCCATGTGGGCTCTTATAATCTCT | 11470 |
| gb:MT007544 | Organism:Severe | AAAGTTTATTATGGTAATGCTTTAGATCAAGCCATTTCCATGTGGGCTCTTATAATCTCT | 11482 |
| gb:MN994467 | Organism:Severe | AAAGTTTATTATGGTAATGCTTTAGATCAAGCCATTTCCATGTGGGCTCTTATAATCTCT | 11482 |
| gb:MT044257 | Organism:Severe | AAAGTTTATTATGGTAATGCTTTAGATCAAGCCATTTCCATGTGGGCTCTTATAATCTCT | 11482 |
| gb:MT106054 | Organism:Severe | AAAGTTTATTATGGTAATGCTTTAGATCAAGCCATTTCCATGTGGGCTCTTATAATCTCT | 11482 |
| gb:MT049951 | Organism:Severe | AAAGTTTATTATGGTAATGCTTTAGATCAAGCCATTTCCATGTGGGCTCTTATAATCTCT | 11482 |
| gb:MN975262 | Organism:Severe | AAAGTTTATTATGGTAATGCTTTAGATCAAGCCATTTCCATGTGGGCTCTTATAATCTCT | 11482 |
| gb:MT106052 | Organism:Severe | AAAGTTTATTATGGTAATGCTTTAGATCAAGCCATTTCCATGTGGGCTCTTATAATCTCT | 11482 |
| gb:LC522975 | Organism:Severe | AAAGTTTATTATGGTAATGCTTTAGATCAAGCCATTTCCATGTGGGCTCTTATAATCTCT | 11479 |
| gb:LC522973 | Organism:Severe | AAAGTTTATTATGGTAATGCTTTAGATCAAGCCATTTCCATGTGGGCTCTTATAATCTCT | 11479 |
| gb:LC522974 | Organism:Severe | AAAGTTTATTATGGTAATGCTTTAGATCAAGCCATTTCCATGTGGGCTCTTATAATCTCT | 11479 |
| gb:MN985325 | Organism:Severe | AAAGTTTATTATGGTAATGCTTTAGATCAAGCCATTTCCATGTGGGCTCTTATAATCTCT | 11482 |
| gb:MT020881 | Organism:Severe | AAAGTTTATTATGGTAATGCTTTAGATCAAGCCATTTCCATGTGGGCTCTTATAATCTCT | 11482 |
| gb:MT020880 | Organism:Severe | AAAGTTTATTATGGTAATGCTTTAGATCAAGCCATTTCCATGTGGGCTCTTATAATCTCT | 11482 |
| gb:MT066175 | Organism:Severe | AAAGTTTATTATGGTAATGCTTTAGATCAAGCCATTTCCATGTGGGCTCTTATAATCTCT | 11482 |
| gb:MN997409 | Organism:Severe | AAAGTTTATTATGGTAATGCTTTAGATCAAGCCATTTCCATGTGGGCTCTTATAATCTCT | 11482 |
| gb:MN938384 | Organism:Severe | AAAGTTTATTATGGTAATGCTTTAGATCAAGCCATTTCCATGTGGGCTCTTATAATCTCT | 11450 |
| gb:MT044258 | Organism:Severe | AAAGTTTATTATGGTAATGCTTTAGATCAAGCCATTTCCATGTGGGCTCTTATAATCTCT | 11458 |
| gb:MT039890 | Organism:Severe | AAAGTTTATTATGGTAATGCTTTAGATCAAGCCATTTCCATGTGGGCTCTTATAATCTCT | 11482 |
| gb:MN988713 | Organism:Severe | AAAGTTTATTATGGTAATGCTTTAGATCAAGCCATTTCCATGTGGGCTCTTATAATCTCT | 11482 |
| gb:LC521925 | Organism:Severe | AAAGTTTATTATGGTAATGCTTTAGATCAAGCCATTTCCATGTGGGCTCTTATAATCTCT | 11455 |
| gb:MT093571 | Organism:Severe | AAAGTTTATTATGGTAATGCTTTAGATCAAGCCATTTCCATGTGGGCTCTTATAATCTCT | 11482 |
| gb:MT039887 | Organism:Severe | AAAGTTTATTATGGTAATGCTTTAGATCAAGCCATTTCCATGTGGGCTCTTATAATCTCT | 11482 |
| gb:MT019530 | Organism:Severe | AAAGTTTATTATGGTAATGCTTTAGATCAAGCCATTTCCATGTGGGCTCTTATAATCTCT | 11482 |
| gb:MT039888 | Organism:Severe | AAAGTTTATTATGGTAATGCTTTAGATCAAGCCATTTCCATGTGGGCTCTTATAATCTCT | 11482 |
| gb:LC522972 | Organism:Severe | AAAGTTTATTATGGTAATGCTTTAGATCAAGCCATTTCCATGTGGGCTCTTATAATCTCT | 11479 |
| gb:MT027063 | Organism:Severe | AAAGTTTATTATGGTAATGCTTTAGATCAAGCCATTTCCATGTGGGCTCTTATAATCTCT | 11482 |
| gb:MT027062 | Organism:Severe | AAAGTTTATTATGGTAATGCTTTAGATCAAGCCATTTCCATGTGGGCTCTTATAATCTCT | 11482 |
| gb:MT019529 | Organism:Severe | AAAGTTTATTATGGTAATGCTTTAGATCAAGCCATTTCCATGTGGGCTCTTATAATCTCT | 11482 |
| gb:MN996529 | Organism:Severe | AAAGTTTATTATGGTAATGCTTTAGATCAAGCCATTTCCATGTGGGCTCTTATAATCTCT | 11470 |
| gb:MN996531 | Organism:Severe | AAAGTTTATTATGGTAATGCTTTAGATCAAGCCATTTCCATGTGGGCTCTTATAATCTCT | 11469 |
| gb:MT066176 | Organism:Severe | AAAGTTTATTATGGTAATGCTTTAGATCAAGCCATTTCCATGTGGGCTCTTATAATCTCT | 11482 |
| gb:MT027064 | Organism:Severe | AAAGTTTATTATGGTAATGCTTTAGATCAAGCCATTTCCATGTGGGCTCTTATAATCTCT | 11482 |
| gb:MN994468 | Organism:Severe | AAAGTTTATTATGGTAATGCTTTAGATCAAGCCATTTCCATGTGGGCTCTTATAATCTCT | 11482 |
| gb:MT072688 | Organism:Severe | AAAGTTTATTATGGTAATGCTTTAGATCAAGCCATTTCCATGTGGGCTCTTATAATCTCT | 11467 |
| gb:MN996527 | Organism:Severe | AAAGTTTATTATGGTAATGCTTTAGATCAAGCCATTTCCATGTGGGCTCTTATAATCTCT | 11449 |
| gb:MT093631 | Organism:Severe | AAAGTTTATTATGGTAATGCTTTAGATCAAGCCATTTCCATGTGGGCTCTTATAATCTCT | 11520 |
| gb:MT106053 | Organism:Severe | AAAGTTTATTATGGTAATGCTTTAGATCAAGCCATTTCCATGTGGGCTCTTATAATCTCT | 11482 |
| gb:MT019533 | Organism:Severe | AAAGTTTATTATGGTAATGCTTTAGATCAAGCCATTTCCATGTGGGCTCTTATAATCTCT | 11482 |
| gb:MT019531 | Organism:Severe | AAAGTTTATTATGGTAATGCTTTAGATCAAGCCATTTCCATGTGGGCTCTTATAATCTCT | 11482 |
| gb:MN996528 | Organism:Severe | AAAGTTTATTATGGTAATGCTTTAGATCAAGCCATTTCCATGTGGGCTCTTATAATCTCT | 11482 |
| gb:MN996530 | Organism:Severe | AAAGTTTATTATGGTAATGCTTTAGATCAAGCCATTTCCATGTGGGCTCTTATAATCTCT | 11468 |
| gb:MN908947 | Organism:Severe | AAAGTTTATTATGGTAATGCTTTAGATCAAGCCATTTCCATGTGGGCTCTTATAATCTCT | 11482 |
| gb:MT019532 | Organism:Severe | AAAGTTTATTATGGTAATGCTTTAGATCAAGCCATTTCCATGTGGGCTCTTATAATCTCT | 11482 |

\*\*\*\*\*

|             |                 |                                                             |       |
|-------------|-----------------|-------------------------------------------------------------|-------|
| gb:MT020781 | Organism:Severe | GTTACTTCTAACTACTCAGGTGTAGTTACAACGTGCATGTTTTGGCCAGAGGTATTGTT | 11530 |
| gb:MT007544 | Organism:Severe | GTTACTTCTAACTACTCAGGTGTAGTTACAACGTGCATGTTTTGGCCAGAGGTATTGTT | 11542 |
| gb:MN994467 | Organism:Severe | GTTACTTCTAACTACTCAGGTGTAGTTACAACGTGCATGTTTTGGCCAGAGGTATTGTT | 11542 |
| gb:MT044257 | Organism:Severe | GTTACTTCTAACTACTCAGGTGTAGTTACAACGTGCATGTTTTGGCCAGAGGTATTGTT | 11542 |





|             |                 |                                                                       |       |
|-------------|-----------------|-----------------------------------------------------------------------|-------|
| gb:MN908947 | Organism:Severe | ATGCTAGTTTATTGTTTCTTAGGCTATTTTTGTACTTGTTACTTTGGCCTCTTTTGTTTA          | 11662 |
| gb:MT019532 | Organism:Severe | ATGCTAGTTTATTGTTTCTTAGGCTATTTTTGTACTTGTTACTTTGGCCTCTTTTGTTTA<br>***** | 11662 |

|             |                 |                                                                       |       |
|-------------|-----------------|-----------------------------------------------------------------------|-------|
| gb:MT020781 | Organism:Severe | CTCAACCGCTACTTTAGACTGACTCTTGGTGTTTATGATTACTTAGTTTCTACACAGGAG          | 11710 |
| gb:MT007544 | Organism:Severe | CTCAACCGCTACTTTAGACTGACTCTTGGTGTTTATGATTACTTAGTTTCTACACAGGAG          | 11722 |
| gb:MN994467 | Organism:Severe | CTCAACCGCTACTTTAGACTGACTCTTGGTGTTTATGATTACTTAGTTTCTACACAGGAG          | 11722 |
| gb:MT044257 | Organism:Severe | CTCAACCGCTACTTTAGACTGACTCTTGGTGTTTATGATTACTTAGTTTCTACACAGGAG          | 11722 |
| gb:MT106054 | Organism:Severe | CTCAACCGCTACTTTAGACTGACTCTTGGTGTTTATGATTACTTAGTTTCTACACAGGAG          | 11722 |
| gb:MT049951 | Organism:Severe | CTCAACCGCTACTTTAGACTGACTCTTGGTGTTTATGATTACTTAGTTTCTACACAGGAG          | 11722 |
| gb:MN975262 | Organism:Severe | CTCAACCGCTACTTTAGACTGACTCTTGGTGTTTATGATTACTTAGTTTCTACACAGGAG          | 11722 |
| gb:MT106052 | Organism:Severe | CTCAACCGCTACTTTAGACTGACTCTTGGTGTTTATGATTACTTAGTTTCTACACAGGAG          | 11722 |
| gb:LC522975 | Organism:Severe | CTCAACCGCTACTTTAGACTGACTCTTGGTGTTTATGATTACTTAGTTTCTACACAGGAG          | 11719 |
| gb:LC522973 | Organism:Severe | CTCAACCGCTACTTTAGACTGACTCTTGGTGTTTATGATTACTTAGTTTCTACACAGGAG          | 11719 |
| gb:LC522974 | Organism:Severe | CTCAACCGCTACTTTAGACTGACTCTTGGTGTTTATGATTACTTAGTTTCTACACAGGAG          | 11719 |
| gb:MN985325 | Organism:Severe | CTCAACCGCTACTTTAGACTGACTCTTGGTGTTTATGATTACTTAGTTTCTACACAGGAG          | 11722 |
| gb:MT020881 | Organism:Severe | CTCAACCGCTACTTTAGACTGACTCTTGGTGTTTATGATTACTTAGTTTCTACACAGGAG          | 11722 |
| gb:MT020880 | Organism:Severe | CTCAACCGCTACTTTAGACTGACTCTTGGTGTTTATGATTACTTAGTTTCTACACAGGAG          | 11722 |
| gb:MT066175 | Organism:Severe | CTCAACCGCTACTTTAGACTGACTCTTGGTGTTTATGATTACTTAGTTTCTACACAGGAG          | 11722 |
| gb:MN997409 | Organism:Severe | CTCAACCGCTACTTTAGACTGACTCTTGGTGTTTATGATTACTTAGTTTCTACACAGGAG          | 11722 |
| gb:MN938384 | Organism:Severe | CTCAACCGCTACTTTAGACTGACTCTTGGTGTTTATGATTACTTAGTTTCTACACAGGAG          | 11690 |
| gb:MT044258 | Organism:Severe | CTCAACCGCTACTTTAGACTGACTCTTGGTGTTTATGATTACTTAGTTTCTACACAGGAG          | 11698 |
| gb:MT039890 | Organism:Severe | CTCAACCGCTACTTTAGACTGACTCTTGGTGTTTATGATTACTTAGTTTCTACACAGGAG          | 11722 |
| gb:MN988713 | Organism:Severe | CTCAACCGCTACTTTAGACTGACTCTTGGTGTTTATGATTACTTAGTTTCTACACAGGAG          | 11722 |
| gb:LC521925 | Organism:Severe | CTCAACCGCTACTTTAGACTGACTCTTGGTGTTTATGATTACTTAGTTTCTACACAGGAG          | 11695 |
| gb:MT093571 | Organism:Severe | CTCAACCGCTACTTTAGACTGACTCTTGGTGTTTATGATTACTTAGTTTCTACACAGGAG          | 11722 |
| gb:MT039887 | Organism:Severe | CTCAACCGCTACTTTAGACTGACTCTTGGTGTTTATGATTACTTAGTTTCTACACAGGAG          | 11722 |
| gb:MT019530 | Organism:Severe | CTCAACCGCTACTTTAGACTGACTCTTGGTGTTTATGATTACTTAGTTTCTACACAGGAG          | 11722 |
| gb:MT039888 | Organism:Severe | CTCAACCGCTACTTTAGACTGACTCTTGGTGTTTATGATTACTTAGTTTCTACACAGGAG          | 11722 |
| gb:LC522972 | Organism:Severe | CTCAACCGCTACTTTAGACTGACTCTTGGTGTTTATGATTACTTAGTTTCTACACAGGAG          | 11719 |
| gb:MT027063 | Organism:Severe | CTCAACCGCTACTTTAGACTGACTCTTGGTGTTTATGATTACTTAGTTTCTACACAGGAG          | 11722 |
| gb:MT027062 | Organism:Severe | CTCAACCGCTACTTTAGACTGACTCTTGGTGTTTATGATTACTTAGTTTCTACACAGGAG          | 11722 |
| gb:MT019529 | Organism:Severe | CTCAACCGCTACTTTAGACTGACTCTTGGTGTTTATGATTACTTAGTTTCTACACAGGAG          | 11722 |
| gb:MN996529 | Organism:Severe | CTCAACCGCTACTTTAGACTGACTCTTGGTGTTTATGATTACTTAGTTTCTACACAGGAG          | 11710 |
| gb:MN996531 | Organism:Severe | CTCAACCGCTACTTTAGACTGACTCTTGGTGTTTATGATTACTTAGTTTCTACACAGGAG          | 11709 |
| gb:MT066176 | Organism:Severe | CTCAACCGCTACTTTAGACTGACTCTTGGTGTTTATGATTACTTAGTTTCTACACAGGAG          | 11722 |
| gb:MT027064 | Organism:Severe | CTCAACCGCTACTTTAGACTGACTCTTGGTGTTTATGATTACTTAGTTTCTACACAGGAG          | 11722 |
| gb:MN994468 | Organism:Severe | CTCAACCGCTACTTTAGACTGACTCTTGGTGTTTATGATTACTTAGTTTCTACACAGGAG          | 11722 |
| gb:MT072688 | Organism:Severe | CTCAACCGCTACTTTAGACTGACTCTTGGTGTTTATGATTACTTAGTTTCTACACAGGAG          | 11707 |
| gb:MN996527 | Organism:Severe | CTCAACCGCTACTTTAGACTGACTCTTGGTGTTTATGATTACTTAGTTTCTACACAGGAG          | 11689 |
| gb:MT093631 | Organism:Severe | CTCAACCGCTACTTTAGACTGACTCTTGGTGTTTATGATTACTTAGTTTCTACACAGGAG          | 11760 |
| gb:MT106053 | Organism:Severe | CTCAACCGCTACTTTAGACTGACTCTTGGTGTTTATGATTACTTAGTTTCTACACAGGAG          | 11722 |
| gb:MT019533 | Organism:Severe | CTCAACCGCTACTTTAGACTGACTCTTGGTGTTTATGATTACTTAGTTTCTACACAGGAG          | 11722 |
| gb:MT019531 | Organism:Severe | CTCAACCGCTACTTTAGACTGACTCTTGGTGTTTATGATTACTTAGTTTCTACACAGGAG          | 11722 |
| gb:MN996528 | Organism:Severe | CTCAACCGCTACTTTAGACTGACTCTTGGTGTTTATGATTACTTAGTTTCTACACAGGAG          | 11722 |
| gb:MN996530 | Organism:Severe | CTCAACCGCTACTTTAGACTGACTCTTGGTGTTTATGATTACTTAGTTTCTACACAGGAG          | 11708 |
| gb:MN908947 | Organism:Severe | CTCAACCGCTACTTTAGACTGACTCTTGGTGTTTATGATTACTTAGTTTCTACACAGGAG          | 11722 |
| gb:MT019532 | Organism:Severe | CTCAACCGCTACTTTAGACTGACTCTTGGTGTTTATGATTACTTAGTTTCTACACAGGAG<br>***** | 11722 |

|             |                 |                                                            |       |
|-------------|-----------------|------------------------------------------------------------|-------|
| gb:MT020781 | Organism:Severe | TTTAGATATATGAATTCACAGGGACTACTCCCACCAAGAATAGCATAGATGCCTTCAA | 11770 |
| gb:MT007544 | Organism:Severe | TTTAGATATATGAATTCACAGGGACTACTCCCACCAAGAATAGCATAGATGCCTTCAA | 11782 |
| gb:MN994467 | Organism:Severe | TTTAGATATATGAATTCACAGGGACTACTCCCACCAAGAATAGCATAGATGCCTTCAA | 11782 |
| gb:MT044257 | Organism:Severe | TTTAGATATATGAATTCACAGGGACTACTCCCACCAAGAATAGCATAGATGCCTTCAA | 11782 |
| gb:MT106054 | Organism:Severe | TTTAGATATATGAATTCACAGGGACTACTCCCACCAAGAATAGCATAGATGCCTTCAA | 11782 |
| gb:MT049951 | Organism:Severe | TTTAGATATATGAATTCACAGGGACTACTCCCACCAAGAATAGCATAGATGCCTTCAA | 11782 |
| gb:MN975262 | Organism:Severe | TTTAGATATATGAATTCACAGGGACTACTCCCACCAAGAATAGCATAGATGCCTTCAA | 11782 |
| gb:MT106052 | Organism:Severe | TTTAGATATATGAATTCACAGGGACTACTCCCACCAAGAATAGCATAGATGCCTTCAA | 11782 |
| gb:LC522975 | Organism:Severe | TTTAGATATATGAATTCACAGGGACTACTCCCACCAAGAATAGCATAGATGCCTTCAA | 11779 |
| gb:LC522973 | Organism:Severe | TTTAGATATATGAATTCACAGGGACTACTCCCACCAAGAATAGCATAGATGCCTTCAA | 11779 |
| gb:LC522974 | Organism:Severe | TTTAGATATATGAATTCACAGGGACTACTCCCACCAAGAATAGCATAGATGCCTTCAA | 11779 |
| gb:MN985325 | Organism:Severe | TTTAGATATATGAATTCACAGGGACTACTCCCACCAAGAATAGCATAGATGCCTTCAA | 11782 |
| gb:MT020881 | Organism:Severe | TTTAGATATATGAATTCACAGGGACTACTCCCACCAAGAATAGCATAGATGCCTTCAA | 11782 |
| gb:MT020880 | Organism:Severe | TTTAGATATATGAATTCACAGGGACTACTCCCACCAAGAATAGCATAGATGCCTTCAA | 11782 |
| gb:MT066175 | Organism:Severe | TTTAGATATATGAATTCACAGGGACTACTCCCACCAAGAATAGCATAGATGCCTTCAA | 11782 |

|             |                 |                                                            |       |
|-------------|-----------------|------------------------------------------------------------|-------|
| gb:MN997409 | Organism:Severe | TTTAGATATATGAATTCACAGGGACTACTCCCACCAAGAATAGCATAGATGCCTTCAA | 11782 |
| gb:MN938384 | Organism:Severe | TTTAGATATATGAATTCACAGGGACTACTCCCACCAAGAATAGCATAGATGCCTTCAA | 11750 |
| gb:MT044258 | Organism:Severe | TTTAGATATATGAATTCACAGGGACTACTCCCACCAAGAATAGCATAGATGCCTTCAA | 11758 |
| gb:MT039890 | Organism:Severe | TTTAGATATATGAATTCACAGGGACTACTCCCACCAAGAATAGCATAGATGCCTTCAA | 11782 |
| gb:MN988713 | Organism:Severe | TTTAGATATATGAATTCACAGGGACTACTCCCACCAAGAATAGCATAGATGCCTTCAA | 11782 |
| gb:LC521925 | Organism:Severe | TTTAGATATATGAATTCACAGGGACTACTCCCACCAAGAATAGCATAGATGCCTTCAA | 11755 |
| gb:MT093571 | Organism:Severe | TTTAGATATATGAATTCACAGGGACTACTCCCACCAAGAATAGCATAGATGCCTTCAA | 11782 |
| gb:MT039887 | Organism:Severe | TTTAGATATATGAATTCACAGGGACTACTCCCACCAAGAATAGCATAGATGCCTTCAA | 11782 |
| gb:MT019530 | Organism:Severe | TTTAGATATATGAATTCACAGGGACTACTCCCACCAAGAATAGCATAGATGCCTTCAA | 11782 |
| gb:MT039888 | Organism:Severe | TTTAGATATATGAATTCACAGGGACTACTCCCACCAAGAATAGCATAGATGCCTTCAA | 11782 |
| gb:LC522972 | Organism:Severe | TTTAGATATATGAATTCACAGGGACTACTCCCACCAAGAATAGCATAGATGCCTTCAA | 11779 |
| gb:MT027063 | Organism:Severe | TTTAGATATATGAATTCACAGGGACTACTCCCACCAAGAATAGCATAGATGCCTTCAA | 11782 |
| gb:MT027062 | Organism:Severe | TTTAGATATATGAATTCACAGGGACTACTCCCACCAAGAATAGCATAGATGCCTTCAA | 11782 |
| gb:MT019529 | Organism:Severe | TTTAGATATATGAATTCACAGGGACTACTCCCACCAAGAATAGCATAGATGCCTTCAA | 11782 |
| gb:MN996529 | Organism:Severe | TTTAGATATATGAATTCACAGGGACTACTCCCACCAAGAATAGCATAGATGCCTTCAA | 11770 |
| gb:MN996531 | Organism:Severe | TTTAGATATATGAATTCACAGGGACTACTCCCACCAAGAATAGCATAGATGCCTTCAA | 11769 |
| gb:MT066176 | Organism:Severe | TTTAGATATATGAATTCACAGGGACTACTCCCACCAAGAATAGCATAGATGCCTTCAA | 11782 |
| gb:MT027064 | Organism:Severe | TTTAGATATATGAATTCACAGGGACTACTCCCACCAAGAATAGCATAGATGCCTTCAA | 11782 |
| gb:MN994468 | Organism:Severe | TTTAGATATATGAATTCACAGGGACTACTCCCACCAAGAATAGCATAGATGCCTTCAA | 11782 |
| gb:MT072688 | Organism:Severe | TTTAGATATATGAATTCACAGGGACTACTCCCACCAAGAATAGCATAGATGCCTTCAA | 11767 |
| gb:MN996527 | Organism:Severe | TTTAGATATATGAATTCACAGGGACTACTCCCACCAAGAATAGCATAGATGCCTTCAA | 11749 |
| gb:MT093631 | Organism:Severe | TTTAGATATATGAATTCACAGGGACTACTCCCACCAAGAATAGCATAGATGCCTTCAA | 11820 |
| gb:MT106053 | Organism:Severe | TTTAGATATATGAATTCACAGGGACTACTCCCACCAAGAATAGCATAGATGCCTTCAA | 11782 |
| gb:MT019533 | Organism:Severe | TTTAGATATATGAATTCACAGGGACTACTCCCACCAAGAATAGCATAGATGCCTTCAA | 11782 |
| gb:MT019531 | Organism:Severe | TTTAGATATATGAATTCACAGGGACTACTCCCACCAAGAATAGCATAGATGCCTTCAA | 11782 |
| gb:MN996528 | Organism:Severe | TTTAGATATATGAATTCACAGGGACTACTCCCACCAAGAATAGCATAGATGCCTTCAA | 11782 |
| gb:MN996530 | Organism:Severe | TTTAGATATATGAATTCACAGGGACTACTCCCACCAAGAATAGCATAGATGCCTTCAA | 11768 |
| gb:MN908947 | Organism:Severe | TTTAGATATATGAATTCACAGGGACTACTCCCACCAAGAATAGCATAGATGCCTTCAA | 11782 |
| gb:MT019532 | Organism:Severe | TTTAGATATATGAATTCACAGGGACTACTCCCACCAAGAATAGCATAGATGCCTTCAA | 11782 |

\*\*\*\*\*

|             |                 |                                                               |       |
|-------------|-----------------|---------------------------------------------------------------|-------|
| gb:MT020781 | Organism:Severe | CTCAACATTA AATTGTTGGGTGTTGGTGGCAAACCTTGTATCAAAGTAGCCACTGTACAG | 11830 |
| gb:MT007544 | Organism:Severe | CTCAACATTA AATTGTTGGGTGTTGGTGGCAAACCTTGTATCAAAGTAGCCACTGTACAG | 11842 |
| gb:MN994467 | Organism:Severe | CTCAACATTA AATTGTTGGGTGTTGGTGGCAAACCTTGTATCAAAGTAGCCACTGTACAG | 11842 |
| gb:MT044257 | Organism:Severe | CTCAACATTA AATTGTTGGGTGTTGGTGGCAAACCTTGTATCAAAGTAGCCACTGTACAG | 11842 |
| gb:MT106054 | Organism:Severe | CTCAACATTA AATTGTTGGGTGTTGGTGGCAAACCTTGTATCAAAGTAGCCACTGTACAG | 11842 |
| gb:MT049951 | Organism:Severe | CTCAACATTA AATTGTTGGGTGTTGGTGGCAAACCTTGTATCAAAGTAGCCACTGTACAG | 11842 |
| gb:MN975262 | Organism:Severe | CTCAACATTA AATTGTTGGGTGTTGGTGGCAAACCTTGTATCAAAGTAGCCACTGTACAG | 11842 |
| gb:MT106052 | Organism:Severe | CTCAACATTA AATTGTTGGGTGTTGGTGGCAAACCTTGTATCAAAGTAGCCACTGTACAG | 11842 |
| gb:LC522975 | Organism:Severe | CTCAACATTA AATTGTTGGGTGTTGGTGGCAAACCTTGTATCAAAGTAGCCACTGTACAG | 11839 |
| gb:LC522973 | Organism:Severe | CTCAACATTA AATTGTTGGGTGTTGGTGGCAAACCTTGTATCAAAGTAGCCACTGTACAG | 11839 |
| gb:LC522974 | Organism:Severe | CTCAACATTA AATTGTTGGGTGTTGGTGGCAAACCTTGTATCAAAGTAGCCACTGTACAG | 11839 |
| gb:MN985325 | Organism:Severe | CTCAACATTA AATTGTTGGGTGTTGGTGGCAAACCTTGTATCAAAGTAGCCACTGTACAG | 11842 |
| gb:MT020881 | Organism:Severe | CTCAACATTA AATTGTTGGGTGTTGGTGGCAAACCTTGTATCAAAGTAGCCACTGTACAG | 11842 |
| gb:MT020880 | Organism:Severe | CTCAACATTA AATTGTTGGGTGTTGGTGGCAAACCTTGTATCAAAGTAGCCACTGTACAG | 11842 |
| gb:MT066175 | Organism:Severe | CTCAACATTA AATTGTTGGGTGTTGGTGGCAAACCTTGTATCAAAGTAGCCACTGTACAG | 11842 |
| gb:MN997409 | Organism:Severe | CTCAACATTA AATTGTTGGGTGTTGGTGGCAAACCTTGTATCAAAGTAGCCACTGTACAG | 11842 |
| gb:MN938384 | Organism:Severe | CTCAACATTA AATTGTTGGGTGTTGGTGGCAAACCTTGTATCAAAGTAGCCACTGTACAG | 11810 |
| gb:MT044258 | Organism:Severe | CTCAACATTA AATTGTTGGGTGTTGGTGGCAAACCTTGTATCAAAGTAGCCACTGTACAG | 11818 |
| gb:MT039890 | Organism:Severe | CTCAACATTA AATTGTTGGGTGTTGGTGGCAAACCTTGTATCAAAGTAGCCACTGTACAG | 11842 |
| gb:MN988713 | Organism:Severe | CTCAACATTA AATTGTTGGGTGTTGGTGGCAAACCTTGTATCAAAGTAGCCACTGTACAG | 11842 |
| gb:LC521925 | Organism:Severe | CTCAACATTA AATTGTTGGGTGTTGGTGGCAAACCTTGTATCAAAGTAGCCACTGTACAG | 11815 |
| gb:MT093571 | Organism:Severe | CTCAACATTA AATTGTTGGGTGTTGGTGGCAAACCTTGTATCAAAGTAGCCACTGTACAG | 11842 |
| gb:MT039887 | Organism:Severe | CTCAACATTA AATTGTTGGGTGTTGGTGGCAAACCTTGTATCAAAGTAGCCACTGTACAG | 11842 |
| gb:MT019530 | Organism:Severe | CTCAACATTA AATTGTTGGGTGTTGGTGGCAAACCTTGTATCAAAGTAGCCACTGTACAG | 11842 |
| gb:MT039888 | Organism:Severe | CTCAACATTA AATTGTTGGGTGTTGGTGGCAAACCTTGTATCAAAGTAGCCACTGTACAG | 11842 |
| gb:LC522972 | Organism:Severe | CTCAACATTA AATTGTTGGGTGTTGGTGGCAAACCTTGTATCAAAGTAGCCACTGTACAG | 11839 |
| gb:MT027063 | Organism:Severe | CTCAACATTA AATTGTTGGGTGTTGGTGGCAAACCTTGTATCAAAGTAGCCACTGTACAG | 11842 |
| gb:MT027062 | Organism:Severe | CTCAACATTA AATTGTTGGGTGTTGGTGGCAAACCTTGTATCAAAGTAGCCACTGTACAG | 11842 |
| gb:MT019529 | Organism:Severe | CTCAACATTA AATTGTTGGGTGTTGGTGGCAAACCTTGTATCAAAGTAGCCACTGTACAG | 11842 |
| gb:MN996529 | Organism:Severe | CTCAACATTA AATTGTTGGGTGTTGGTGGCAAACCTTGTATCAAAGTAGCCACTGTACAG | 11830 |
| gb:MN996531 | Organism:Severe | CTCAACATTA AATTGTTGGGTGTTGGTGGCAAACCTTGTATCAAAGTAGCCACTGTACAG | 11829 |
| gb:MT066176 | Organism:Severe | CTCAACATTA AATTGTTGGGTGTTGGTGGCAAACCTTGTATCAAAGTAGCCACTGTACAG | 11842 |
| gb:MT027064 | Organism:Severe | CTCAACATTA AATTGTTGGGTGTTGGTGGCAAACCTTGTATCAAAGTAGCCACTGTACAG | 11842 |
| gb:MN994468 | Organism:Severe | CTCAACATTA AATTGTTGGGTGTTGGTGGCAAACCTTGTATCAAAGTAGCCACTGTACAG | 11842 |

|             |                 |                                                               |       |
|-------------|-----------------|---------------------------------------------------------------|-------|
| gb:MT072688 | Organism:Severe | CTCAACATTA AATTGTTGGGTGTTGGTGGCAAACCTTGTATCAAAGTAGCCACTGTACAG | 11827 |
| gb:MN996527 | Organism:Severe | CTCAACATTA AATTGTTGGGTGTTGGTGGCAAACCTTGTATCAAAGTAGCCACTGTACAG | 11809 |
| gb:MT093631 | Organism:Severe | CTCAACATTA AATTGTTGGGTGTTGGTGGCAAACCTTGTATCAAAGTAGCCACTGTACAG | 11880 |
| gb:MT106053 | Organism:Severe | CTCAACATTA AATTGTTGGGTGTTGGTGGCAAACCTTGTATCAAAGTAGCCACTGTACAG | 11842 |
| gb:MT019533 | Organism:Severe | CTCAACATTA AATTGTTGGGTGTTGGTGGCAAACCTTGTATCAAAGTAGCCACTGTACAG | 11842 |
| gb:MT019531 | Organism:Severe | CTCAACATTA AATTGTTGGGTGTTGGTGGCAAACCTTGTATCAAAGTAGCCACTGTACAG | 11842 |
| gb:MN996528 | Organism:Severe | CTCAACATTA AATTGTTGGGTGTTGGTGGCAAACCTTGTATCAAAGTAGCCACTGTACAG | 11842 |
| gb:MN996530 | Organism:Severe | CTCAACATTA AATTGTTGGGTGTTGGTGGCAAACCTTGTATCAAAGTAGCCACTGTACAG | 11828 |
| gb:MN908947 | Organism:Severe | CTCAACATTA AATTGTTGGGTGTTGGTGGCAAACCTTGTATCAAAGTAGCCACTGTACAG | 11842 |
| gb:MT019532 | Organism:Severe | CTCAACATTA AATTGTTGGGTGTTGGTGGCAAACCTTGTATCAAAGTAGCCACTGTACAG | 11842 |

\*\*\*\*\*

|             |                 |                                                                |       |
|-------------|-----------------|----------------------------------------------------------------|-------|
| gb:MT020781 | Organism:Severe | TCTAAAATGTCAGATGTA AAGTGCACATCAGTAGTCTTACTCTCAGTTTTGCAACAACCTC | 11890 |
| gb:MT007544 | Organism:Severe | TCTAAAATGTCAGATGTA AAGTGCACATCAGTAGTCTTACTCTCAGTTTTGCAACAACCTC | 11902 |
| gb:MN994467 | Organism:Severe | TCTAAAATGTCAGATGTA AAGTGCACATCAGTAGTCTTACTCTCAGTTTTGCAACAACCTC | 11902 |
| gb:MT044257 | Organism:Severe | TCTAAAATGTCAGATGTA AAGTGCACATCAGTAGTCTTACTCTCAGTTTTGCAACAACCTC | 11902 |
| gb:MT106054 | Organism:Severe | TCTAAAATGTCAGATGTA AAGTGCACATCAGTAGTCTTACTCTCAGTTTTGCAACAACCTC | 11902 |
| gb:MT049951 | Organism:Severe | TCTAAAATGTCAGATGTA AAGTGCACATCAGTAGTCTTACTCTCAGTTTTGCAACAACCTC | 11902 |
| gb:MN975262 | Organism:Severe | TCTAAAATGTCAGATGTA AAGTGCACATCAGTAGTCTTACTCTCAGTTTTGCAACAACCTC | 11902 |
| gb:MT106052 | Organism:Severe | TCTAAAATGTCAGATGTA AAGTGCACATCAGTAGTCTTACTCTCAGTTTTGCAACAACCTC | 11902 |
| gb:LC522975 | Organism:Severe | TCTAAAATGTCAGATGTA AAGTGCACATCAGTAGTCTTACTCTCAGTTTTGCAACAACCTC | 11899 |
| gb:LC522973 | Organism:Severe | TCTAAAATGTCAGATGTA AAGTGCACATCAGTAGTCTTACTCTCAGTTTTGCAACAACCTC | 11899 |
| gb:LC522974 | Organism:Severe | TCTAAAATGTCAGATGTA AAGTGCACATCAGTAGTCTTACTCTCAGTTTTGCAACAACCTC | 11899 |
| gb:MN985325 | Organism:Severe | TCTAAAATGTCAGATGTA AAGTGCACATCAGTAGTCTTACTCTCAGTTTTGCAACAACCTC | 11902 |
| gb:MT020881 | Organism:Severe | TCTAAAATGTCAGATGTA AAGTGCACATCAGTAGTCTTACTCTCAGTTTTGCAACAACCTC | 11902 |
| gb:MT020880 | Organism:Severe | TCTAAAATGTCAGATGTA AAGTGCACATCAGTAGTCTTACTCTCAGTTTTGCAACAACCTC | 11902 |
| gb:MT066175 | Organism:Severe | TCTAAAATGTCAGATGTA AAGTGCACATCAGTAGTCTTACTCTCAGTTTTGCAACAACCTC | 11902 |
| gb:MN997409 | Organism:Severe | TCTAAAATGTCAGATGTA AAGTGCACATCAGTAGTCTTACTCTCAGTTTTGCAACAACCTC | 11902 |
| gb:MN938384 | Organism:Severe | TCTAAAATGTCAGATGTA AAGTGCACATCAGTAGTCTTACTCTCAGTTTTGCAACAACCTC | 11870 |
| gb:MT044258 | Organism:Severe | TCTAAAATGTCAGATGTA AAGTGCACATCAGTAGTCTTACTCTCAGTTTTGCAACAACCTC | 11878 |
| gb:MT039890 | Organism:Severe | TCTAAAATGTCAGATGTA AAGTGCACATCAGTAGTCTTACTCTCAGTTTTGCAACAACCTC | 11902 |
| gb:MN988713 | Organism:Severe | TCTAAAATGTCAGATGTA AAGTGCACATCAGTAGTCTTACTCTCAGTTTTGCAACAACCTC | 11902 |
| gb:LC521925 | Organism:Severe | TCTAAAATGTCAGATGTA AAGTGCACATCAGTAGTCTTACTCTCAGTTTTGCAACAACCTC | 11875 |
| gb:MT093571 | Organism:Severe | TCTAAAATGTCAGATGTA AAGTGCACATCAGTAGTCTTACTCTCAGTTTTGCAACAACCTC | 11902 |
| gb:MT039887 | Organism:Severe | TCTAAAATGTCAGATGTA AAGTGCACATCAGTAGTCTTACTCTCAGTTTTGCAACAACCTC | 11902 |
| gb:MT019530 | Organism:Severe | TCTAAAATGTCAGATGTA AAGTGCACATCAGTAGTCTTACTCTCAGTTTTGCAACAACCTC | 11902 |
| gb:MT039888 | Organism:Severe | TCTAAAATGTCAGATGTA AAGTGCACATCAGTAGTCTTACTCTCAGTTTTGCAACAACCTC | 11902 |
| gb:LC522972 | Organism:Severe | TCTAAAATGTCAGATGTA AAGTGCACATCAGTAGTCTTACTCTCAGTTTTGCAACAACCTC | 11899 |
| gb:MT027063 | Organism:Severe | TCTAAAATGTCAGATGTA AAGTGCACATCAGTAGTCTTACTCTCAGTTTTGCAACAACCTC | 11902 |
| gb:MT027062 | Organism:Severe | TCTAAAATGTCAGATGTA AAGTGCACATCAGTAGTCTTACTCTCAGTTTTGCAACAACCTC | 11902 |
| gb:MT019529 | Organism:Severe | TCTAAAATGTCAGATGTA AAGTGCACATCAGTAGTCTTACTCTCAGTTTTGCAACAACCTC | 11902 |
| gb:MN996529 | Organism:Severe | TCTAAAATGTCAGATGTA AAGTGCACATCAGTAGTCTTACTCTCAGTTTTGCAACAACCTC | 11890 |
| gb:MN996531 | Organism:Severe | TCTAAAATGTCAGATGTA AAGTGCACATCAGTAGTCTTACTCTCAGTTTTGCAACAACCTC | 11889 |
| gb:MT066176 | Organism:Severe | TCTAAAATGTCAGATGTA AAGTGCACATCAGTAGTCTTACTCTCAGTTTTGCAACAACCTC | 11902 |
| gb:MT027064 | Organism:Severe | TCTAAAATGTCAGATGTA AAGTGCACATCAGTAGTCTTACTCTCAGTTTTGCAACAACCTC | 11902 |
| gb:MN994468 | Organism:Severe | TCTAAAATGTCAGATGTA AAGTGCACATCAGTAGTCTTACTCTCAGTTTTGCAACAACCTC | 11902 |
| gb:MT072688 | Organism:Severe | TCTAAAATGTCAGATGTA AAGTGCACATCAGTAGTCTTACTCTCAGTTTTGCAACAACCTC | 11887 |
| gb:MN996527 | Organism:Severe | TCTAAAATGTCAGATGTA AAGTGCACATCAGTAGTCTTACTCTCAGTTTTGCAACAACCTC | 11869 |
| gb:MT093631 | Organism:Severe | TCTAAAATGTCAGATGTA AAGTGCACATCAGTAGTCTTACTCTCAGTTTTGCAACAACCTC | 11940 |
| gb:MT106053 | Organism:Severe | TCTAAAATGTCAGATGTA AAGTGCACATCAGTAGTCTTACTCTCAGTTTTGCAACAACCTC | 11902 |
| gb:MT019533 | Organism:Severe | TCTAAAATGTCAGATGTA AAGTGCACATCAGTAGTCTTACTCTCAGTTTTGCAACAACCTC | 11902 |
| gb:MT019531 | Organism:Severe | TCTAAAATGTCAGATGTA AAGTGCACATCAGTAGTCTTACTCTCAGTTTTGCAACAACCTC | 11902 |
| gb:MN996528 | Organism:Severe | TCTAAAATGTCAGATGTA AAGTGCACATCAGTAGTCTTACTCTCAGTTTTGCAACAACCTC | 11902 |
| gb:MN996530 | Organism:Severe | TCTAAAATGTCAGATGTA AAGTGCACATCAGTAGTCTTACTCTCAGTTTTGCAACAACCTC | 11888 |
| gb:MN908947 | Organism:Severe | TCTAAAATGTCAGATGTA AAGTGCACATCAGTAGTCTTACTCTCAGTTTTGCAACAACCTC | 11902 |
| gb:MT019532 | Organism:Severe | TCTAAAATGTCAGATGTA AAGTGCACATCAGTAGTCTTACTCTCAGTTTTGCAACAACCTC | 11902 |

\*\*\*\*\*

|             |                 |                                                              |       |
|-------------|-----------------|--------------------------------------------------------------|-------|
| gb:MT020781 | Organism:Severe | AGAGTAGAATCATCATCTAAATTGTGGGCTCAATGTGTCCAGTTACACAATGACATTCTC | 11950 |
| gb:MT007544 | Organism:Severe | AGAGTAGAATCATCATCTAAATTGTGGGCTCAATGTGTCCAGTTACACAATGACATTCTC | 11962 |
| gb:MN994467 | Organism:Severe | AGAGTAGAATCATCATCTAAATTGTGGGCTCAATGTGTCCAGTTACACAATGACATTCTC | 11962 |
| gb:MT044257 | Organism:Severe | AGAGTAGAATCATCATCTAAATTGTGGGCTCAATGTGTCCAGTTACACAATGACATTCTC | 11962 |
| gb:MT106054 | Organism:Severe | AGAGTAGAATCATCATCTAAATTGTGGGCTCAATGTGTCCAGTTACACAATGACATTCTC | 11962 |
| gb:MT049951 | Organism:Severe | AGAGTAGAATCATCATCTAAATTGTGGGCTCAATGTGTCCAGTTACACAATGACATTCTC | 11962 |
| gb:MN975262 | Organism:Severe | AGAGTAGAATCATCATCTAAATTGTGGGCTCAATGTGTCCAGTTACACAATGACATTCTC | 11962 |



|             |                 |                                                              |       |
|-------------|-----------------|--------------------------------------------------------------|-------|
| gb:MT027063 | Organism:Severe | TTAGCTAAAGATACTACTGAAGCCTTTGAAAAAATGGTTTCACTACTTTCTGTTTTGCTT | 12022 |
| gb:MT027062 | Organism:Severe | TTAGCTAAAGATACTACTGAAGCCTTTGAAAAAATGGTTTCACTACTTTCTGTTTTGCTT | 12022 |
| gb:MT019529 | Organism:Severe | TTAGCTAAAGATACTACTGAAGCCTTTGAAAAAATGGTTTCACTACTTTCTGTTTTGCTT | 12022 |
| gb:MN996529 | Organism:Severe | TTAGCTAAAGATACTACTGAAGCCTTTGAAAAAATGGTTTCACTACTTTCTGTTTTGCTT | 12010 |
| gb:MN996531 | Organism:Severe | TTAGCTAAAGATACTACTGAAGCCTTTGAAAAAATGGTTTCACTACTTTCTGTTTTGCTT | 12009 |
| gb:MT066176 | Organism:Severe | TTAGCTAAAGATACTACTGAAGCCTTTGAAAAAATGGTTTCACTACTTTCTGTTTTGCTT | 12022 |
| gb:MT027064 | Organism:Severe | TTAGCTAAAGATACTACTGAAGCCTTTGAAAAAATGGTTTCACTACTTTCTGTTTTGCTT | 12022 |
| gb:MN994468 | Organism:Severe | TTAGCTAAAGATACTACTGAAGCCTTTGAAAAAATGGTTTCACTACTTTCTGTTTTGCTT | 12022 |
| gb:MT072688 | Organism:Severe | TTAGCTAAAGATACTACTGAAGCCTTTGAAAAAATGGTTTCACTACTTTCTGTTTTGCTT | 12007 |
| gb:MN996527 | Organism:Severe | TTAGCTAAAGATACTACTGAAGCCTTTGAAAAAATGGTTTCACTACTTTCTGTTTTGCTT | 11989 |
| gb:MT093631 | Organism:Severe | TTAGCTAAAGATACTACTGAAGCCTTTGAAAAAATGGTTTCACTACTTTCTGTTTTGCTT | 12060 |
| gb:MT106053 | Organism:Severe | TTAGCTAAAGATACTACTGAAGCCTTTGAAAAAATGGTTTCACTACTTTCTGTTTTGCTT | 12022 |
| gb:MT019533 | Organism:Severe | TTAGCTAAAGATACTACTGAAGCCTTTGAAAAAATGGTTTCACTACTTTCTGTTTTGCTT | 12022 |
| gb:MT019531 | Organism:Severe | TTAGCTAAAGATACTACTGAAGCCTTTGAAAAAATGGTTTCACTACTTTCTGTTTTGCTT | 12022 |
| gb:MN996528 | Organism:Severe | TTAGCTAAAGATACTACTGAAGCCTTTGAAAAAATGGTTTCACTACTTTCTGTTTTGCTT | 12022 |
| gb:MN996530 | Organism:Severe | TTAGCTAAAGATACTACTGAAGCCTTTGAAAAAATGGTTTCACTACTTTCTGTTTTGCTT | 12008 |
| gb:MN908947 | Organism:Severe | TTAGCTAAAGATACTACTGAAGCCTTTGAAAAAATGGTTTCACTACTTTCTGTTTTGCTT | 12022 |
| gb:MT019532 | Organism:Severe | TTAGCTAAAGATACTACTGAAGCCTTTGAAAAAATGGTTTCACTACTTTCTGTTTTGCTT | 12022 |

\*\*\*\*\*

|             |                 |                                                             |       |
|-------------|-----------------|-------------------------------------------------------------|-------|
| gb:MT020781 | Organism:Severe | TCCATGCAGGGTCTGTAGACATAAACAAGCTTTGTGAAGAAATGCTGGACAACAGGGCA | 12070 |
| gb:MT007544 | Organism:Severe | TCCATGCAGGGTCTGTAGACATAAACAAGCTTTGTGAAGAAATGCTGGACAACAGGGCA | 12082 |
| gb:MN994467 | Organism:Severe | TCCATGCAGGGTCTGTAGACATAAACAAGCTTTGTGAAGAAATGCTGGACAACAGGGCA | 12082 |
| gb:MT044257 | Organism:Severe | TCCATGCAGGGTCTGTAGACATAAACAAGCTTTGTGAAGAAATGCTGGACAACAGGGCA | 12082 |
| gb:MT106054 | Organism:Severe | TCCATGCAGGGTCTGTAGACATAAACAAGCTTTGTGAAGAAATGCTGGACAACAGGGCA | 12082 |
| gb:MT049951 | Organism:Severe | TCCATGCAGGGTCTGTAGACATAAACAAGCTTTGTGAAGAAATGCTGGACAACAGGGCA | 12082 |
| gb:MN975262 | Organism:Severe | TCCATGCAGGGTCTGTAGACATAAACAAGCTTTGTGAAGAAATGCTGGACAACAGGGCA | 12082 |
| gb:MT106052 | Organism:Severe | TCCATGCAGGGTCTGTAGACATAAACAAGCTTTGTGAAGAAATGCTGGACAACAGGGCA | 12082 |
| gb:LC522975 | Organism:Severe | TCCATGCAGGGTCTGTAGACATAAACAAGCTTTGTGAAGAAATGCTGGACAACAGGGCA | 12079 |
| gb:LC522973 | Organism:Severe | TCCATGCAGGGTCTGTAGACATAAACAAGCTTTGTGAAGAAATGCTGGACAACAGGGCA | 12079 |
| gb:LC522974 | Organism:Severe | TCCATGCAGGGTCTGTAGACATAAACAAGCTTTGTGAAGAAATGCTGGACAACAGGGCA | 12079 |
| gb:MN985325 | Organism:Severe | TCCATGCAGGGTCTGTAGACATAAACAAGCTTTGTGAAGAAATGCTGGACAACAGGGCA | 12082 |
| gb:MT020881 | Organism:Severe | TCCATGCAGGGTCTGTAGACATAAACAAGCTTTGTGAAGAAATGCTGGACAACAGGGCA | 12082 |
| gb:MT020880 | Organism:Severe | TCCATGCAGGGTCTGTAGACATAAACAAGCTTTGTGAAGAAATGCTGGACAACAGGGCA | 12082 |
| gb:MT066175 | Organism:Severe | TCCATGCAGGGTCTGTAGACATAAACAAGCTTTGTGAAGAAATGCTGGACAACAGGGCA | 12082 |
| gb:MN997409 | Organism:Severe | TCCATGCAGGGTCTGTAGACATAAACAAGCTTTGTGAAGAAATGCTGGACAACAGGGCA | 12082 |
| gb:MN938384 | Organism:Severe | TCCATGCAGGGTCTGTAGACATAAACAAGCTTTGTGAAGAAATGCTGGACAACAGGGCA | 12050 |
| gb:MT044258 | Organism:Severe | TCCATGCAGGGTCTGTAGACATAAACAAGCTTTGTGAAGAAATGCTGGACAACAGGGCA | 12058 |
| gb:MT039890 | Organism:Severe | TCCATGCAGGGTCTGTAGACATAAACAAGCTTTGTGAAGAAATGCTGGACAACAGGGCA | 12082 |
| gb:MN988713 | Organism:Severe | TCCATGCAGGGTCTGTAGACATAAACAAGCTTTGTGAAGAAATGCTGGACAACAGGGCA | 12082 |
| gb:LC521925 | Organism:Severe | TCCATGCAGGGTCTGTAGACATAAACAAGCTTTGTGAAGAAATGCTGGACAACAGGGCA | 12055 |
| gb:MT093571 | Organism:Severe | TCCATGCAGGGTCTGTAGACATAAACAAGCTTTGTGAAGAAATGCTGGACAACAGGGCA | 12082 |
| gb:MT039887 | Organism:Severe | TCCATGCAGGGTCTGTAGACATAAACAAGCTTTGTGAAGAAATGCTGGACAACAGGGCA | 12082 |
| gb:MT019530 | Organism:Severe | TCCATGCAGGGTCTGTAGACATAAACAAGCTTTGTGAAGAAATGCTGGACAACAGGGCA | 12082 |
| gb:MT039888 | Organism:Severe | TCCATGCAGGGTCTGTAGACATAAACAAGCTTTGTGAAGAAATGCTGGACAACAGGGCA | 12082 |
| gb:LC522972 | Organism:Severe | TCCATGCAGGGTCTGTAGACATAAACAAGCTTTGTGAAGAAATGCTGGACAACAGGGCA | 12079 |
| gb:MT027063 | Organism:Severe | TCCATGCAGGGTCTGTAGACATAAACAAGCTTTGTGAAGAAATGCTGGACAACAGGGCA | 12082 |
| gb:MT027062 | Organism:Severe | TCCATGCAGGGTCTGTAGACATAAACAAGCTTTGTGAAGAAATGCTGGACAACAGGGCA | 12082 |
| gb:MT019529 | Organism:Severe | TCCATGCAGGGTCTGTAGACATAAACAAGCTTTGTGAAGAAATGCTGGACAACAGGGCA | 12082 |
| gb:MN996529 | Organism:Severe | TCCATGCAGGGTCTGTAGACATAAACAAGCTTTGTGAAGAAATGCTGGACAACAGGGCA | 12070 |
| gb:MN996531 | Organism:Severe | TCCATGCAGGGTCTGTAGACATAAACAAGCTTTGTGAAGAAATGCTGGACAACAGGGCA | 12069 |
| gb:MT066176 | Organism:Severe | TCCATGCAGGGTCTGTAGACATAAACAAGCTTTGTGAAGAAATGCTGGACAACAGGGCA | 12082 |
| gb:MT027064 | Organism:Severe | TCCATGCAGGGTCTGTAGACATAAACAAGCTTTGTGAAGAAATGCTGGACAACAGGGCA | 12082 |
| gb:MN994468 | Organism:Severe | TCCATGCAGGGTCTGTAGACATAAACAAGCTTTGTGAAGAAATGCTGGACAACAGGGCA | 12082 |
| gb:MT072688 | Organism:Severe | TCCATGCAGGGTCTGTAGACATAAACAAGCTTTGTGAAGAAATGCTGGACAACAGGGCA | 12067 |
| gb:MN996527 | Organism:Severe | TCCATGCAGGGTCTGTAGACATAAACAAGCTTTGTGAAGAAATGCTGGACAACAGGGCA | 12049 |
| gb:MT093631 | Organism:Severe | TCCATGCAGGGTCTGTAGACATAAACAAGCTTTGTGAAGAAATGCTGGACAACAGGGCA | 12120 |
| gb:MT106053 | Organism:Severe | TCCATGCAGGGTCTGTAGACATAAACAAGCTTTGTGAAGAAATGCTGGACAACAGGGCA | 12082 |
| gb:MT019533 | Organism:Severe | TCCATGCAGGGTCTGTAGACATAAACAAGCTTTGTGAAGAAATGCTGGACAACAGGGCA | 12082 |
| gb:MT019531 | Organism:Severe | TCCATGCAGGGTCTGTAGACATAAACAAGCTTTGTGAAGAAATGCTGGACAACAGGGCA | 12082 |
| gb:MN996528 | Organism:Severe | TCCATGCAGGGTCTGTAGACATAAACAAGCTTTGTGAAGAAATGCTGGACAACAGGGCA | 12082 |
| gb:MN996530 | Organism:Severe | TCCATGCAGGGTCTGTAGACATAAACAAGCTTTGTGAAGAAATGCTGGACAACAGGGCA | 12068 |
| gb:MN908947 | Organism:Severe | TCCATGCAGGGTCTGTAGACATAAACAAGCTTTGTGAAGAAATGCTGGACAACAGGGCA | 12082 |
| gb:MT019532 | Organism:Severe | TCCATGCAGGGTCTGTAGACATAAACAAGCTTTGTGAAGAAATGCTGGACAACAGGGCA | 12082 |

\*\*\*\*\*



|             |                 |                                                             |       |
|-------------|-----------------|-------------------------------------------------------------|-------|
| gb:MT020781 | Organism:Severe | ACCTTACAAGCTATAGCCTCAGAGTTAGTTCCCTTCCATCATATGCAGCTTTTGCTACT | 12130 |
| gb:MT007544 | Organism:Severe | ACCTTACAAGCTATAGCCTCAGAGTTAGTTCCCTTCCATCATATGCAGCTTTTGCTACT | 12142 |
| gb:MN994467 | Organism:Severe | ACCTTACAAGCTATAGCCTCAGAGTTAGTTCCCTTCCATCATATGCAGCTTTTGCTACT | 12142 |
| gb:MT044257 | Organism:Severe | ACCTTACAAGCTATAGCCTCAGAGTTAGTTCCCTTCCATCATATGCAGCTTTTGCTACT | 12142 |
| gb:MT106054 | Organism:Severe | ACCTTACAAGCTATAGCCTCAGAGTTAGTTCCCTTCCATCATATGCAGCTTTTGCTACT | 12142 |
| gb:MT049951 | Organism:Severe | ACCTTACAAGCTATAGCCTCAGAGTTAGTTCCCTTCCATCATATGCAGCTTTTGCTACT | 12142 |
| gb:MN975262 | Organism:Severe | ACCTTACAAGCTATAGCCTCAGAGTTAGTTCCCTTCCATCATATGCAGCTTTTGCTACT | 12142 |
| gb:MT106052 | Organism:Severe | ACCTTACAAGCTATAGCCTCAGAGTTAGTTCCCTTCCATCATATGCAGCTTTTGCTACT | 12142 |
| gb:LC522975 | Organism:Severe | ACCTTACAAGCTATAGCCTCAGAGTTAGTTCCCTTCCATCATATGCAGCTTTTGCTACT | 12139 |
| gb:LC522973 | Organism:Severe | ACCTTACAAGCTATAGCCTCAGAGTTAGTTCCCTTCCATCATATGCAGCTTTTGCTACT | 12139 |
| gb:LC522974 | Organism:Severe | ACCTTACAAGCTATAGCCTCAGAGTTAGTTCCCTTCCATCATATGCAGCTTTTGCTACT | 12139 |
| gb:MN985325 | Organism:Severe | ACCTTACAAGCTATAGCCTCAGAGTTAGTTCCCTTCCATCATATGCAGCTTTTGCTACT | 12142 |
| gb:MT020881 | Organism:Severe | ACCTTACAAGCTATAGCCTCAGAGTTAGTTCCCTTCCATCATATGCAGCTTTTGCTACT | 12142 |
| gb:MT020880 | Organism:Severe | ACCTTACAAGCTATAGCCTCAGAGTTAGTTCCCTTCCATCATATGCAGCTTTTGCTACT | 12142 |
| gb:MT066175 | Organism:Severe | ACCTTACAAGCTATAGCCTCAGAGTTAGTTCCCTTCCATCATATGCAGCTTTTGCTACT | 12142 |
| gb:MN997409 | Organism:Severe | ACCTTACAAGCTATAGCCTCAGAGTTAGTTCCCTTCCATCATATGCAGCTTTTGCTACT | 12142 |
| gb:MN938384 | Organism:Severe | ACCTTACAAGCTATAGCCTCAGAGTTAGTTCCCTTCCATCATATGCAGCTTTTGCTACT | 12110 |
| gb:MT044258 | Organism:Severe | ACCTTACAAGCTATAGCCTCAGAGTTAGTTCCCTTCCATCATATGCAGCTTTTGCTACT | 12118 |
| gb:MT039890 | Organism:Severe | ACCTTACAAGCTATAGCCTCAGAGTTAGTTCTCTTCCATCATATGCAGCTTTTGCTACT | 12142 |
| gb:MN988713 | Organism:Severe | ACCTTACAAGCTATAGCCTCAGAGTTAGTTCCCTTCCATCATATGCAGCTTTTGCTACT | 12142 |
| gb:LC521925 | Organism:Severe | ACCTTACAAGCTATAGCCTCAGAGTTAGTTCCCTTCCATCATATGCAGCTTTTGCTACT | 12115 |
| gb:MT093571 | Organism:Severe | ACCTTACAAGCTATAGCCTCAGAGTTAGTTCCCTTCCATCATATGCAGCTTTTGCTACT | 12142 |
| gb:MT039887 | Organism:Severe | ACCTTACAAGCTATAGCCTCAGAGTTAGTTCCCTTCCATCATATGCAGCTTTTGCTACT | 12142 |
| gb:MT019530 | Organism:Severe | ACCTTACAAGCTATAGCCTCAGAGTTAGTTCCCTTCCATCATATGCAGCTTTTGCTACT | 12142 |
| gb:MT039888 | Organism:Severe | ACCTTACAAGCTATAGCCTCAGAGTTAGTTCCCTTCCATCATATGCAGCTTTTGCTACT | 12142 |
| gb:LC522972 | Organism:Severe | ACCTTACAAGCTATAGCCTCAGAGTTAGTTCCCTTCCATCATATGCAGCTTTTGCTACT | 12139 |
| gb:MT027063 | Organism:Severe | ACCTTACAAGCTATAGCCTCAGAGTTAGTTCCCTTCCATCATATGCAGCTTTTGCTACT | 12142 |
| gb:MT027062 | Organism:Severe | ACCTTACAAGCTATAGCCTCAGAGTTAGTTCCCTTCCATCATATGCAGCTTTTGCTACT | 12142 |
| gb:MT019529 | Organism:Severe | ACCTTACAAGCTATAGCCTCAGAGTTAGTTCCCTTCCATCATATGCAGCTTTTGCTACT | 12142 |
| gb:MN996529 | Organism:Severe | ACCTTACAAGCTATAGCCTCAGAGTTAGTTCCCTTCCATCATATGCAGCTTTTGCTACT | 12130 |
| gb:MN996531 | Organism:Severe | ACCTTACAAGCTATAGCCTCAGAGTTAGTTCCCTTCCATCATATGCAGCTTTTGCTACT | 12129 |
| gb:MT066176 | Organism:Severe | ACCTTACAAGCTATAGCCTCAGAGTTAGTTCCCTTCCATCATATGCAGCTTTTGCTACT | 12142 |
| gb:MT027064 | Organism:Severe | ACCTTACAAGCTATAGCCTCAGAGTTAGTTCCCTTCCATCATATGCAGCTTTTGCTACT | 12142 |
| gb:MN994468 | Organism:Severe | ACCTTACAAGCTATAGCCTCAGAGTTAGTTCCCTTCCATCATATGCAGCTTTTGCTACT | 12142 |
| gb:MT072688 | Organism:Severe | ACCTTACAAGCTATAGCCTCAGAGTTAGTTCCCTTCCATCATATGCAGCTTTTGCTACT | 12127 |
| gb:MN996527 | Organism:Severe | ACCTTACAAGCTATAGCCTCAGAGTTAGTTCCCTTCCATCATATGCAGCTTTTGCTACT | 12109 |
| gb:MT093631 | Organism:Severe | ACCTTACAAGCTATAGCCTCAGAGTTAGTTCCCTTCCATCATATGCAGCTTTTGCTACT | 12180 |
| gb:MT106053 | Organism:Severe | ACCTTACAAGCTATAGCCTCAGAGTTAGTTCCCTTCCATCATATGCAGCTTTTGCTACT | 12142 |
| gb:MT019533 | Organism:Severe | ACCTTACAAGCTATAGCCTCAGAGTTAGTTCCCTTCCATCATATGCAGCTTTTGCTACT | 12142 |
| gb:MT019531 | Organism:Severe | ACCTTACAAGCTATAGCCTCAGAGTTAGTTCCCTTCCATCATATGCAGCTTTTGCTACT | 12142 |
| gb:MN996528 | Organism:Severe | ACCTTACAAGCTATAGCCTCAGAGTTAGTTCCCTTCCATCATATGCAGCTTTTGCTACT | 12142 |
| gb:MN996530 | Organism:Severe | ACCTTACAAGCTATAGCCTCAGAGTTAGTTCCCTTCCATCATATGCAGCTTTTGCTACT | 12128 |
| gb:MN908947 | Organism:Severe | ACCTTACAAGCTATAGCCTCAGAGTTAGTTCCCTTCCATCATATGCAGCTTTTGCTACT | 12142 |
| gb:MT019532 | Organism:Severe | ACCTTACAAGCTATAGCCTCAGAGTTAGTTCCCTTCCATCATATGCAGCTTTTGCTACT | 12142 |

\*\*\*\*\*

|             |                 |                                                              |       |
|-------------|-----------------|--------------------------------------------------------------|-------|
| gb:MT020781 | Organism:Severe | GCTCAAGAAGCTTATGAGCAGGCTGTTGCTAATGGTGATTCTGAAGTTGTTCTTAAAAAG | 12190 |
| gb:MT007544 | Organism:Severe | GCTCAAGAAGCTTATGAGCAGGCTGTTGCTAATGGTGATTCTGAAGTTGTTCTTAAAAAG | 12202 |
| gb:MN994467 | Organism:Severe | GCTCAAGAAGCTTATGAGCAGGCTGTTGCTAATGGTGATTCTGAAGTTGTTCTTAAAAAG | 12202 |
| gb:MT044257 | Organism:Severe | GCTCAAGAAGCTTATGAGCAGGCTGTTGCTAATGGTGATTCTGAAGTTGTTCTTAAAAAG | 12202 |
| gb:MT106054 | Organism:Severe | GCTCAAGAAGCTTATGAGCAGGCTGTTGCTAATGGTGATTCTGAAGTTGTTCTTAAAAAG | 12202 |
| gb:MT049951 | Organism:Severe | GCTCAAGAAGCTTATGAGCAGGCTGTTGCTAATGGTGATTCTGAAGTTGTTCTTAAAAAG | 12202 |
| gb:MN975262 | Organism:Severe | GCTCAAGAAGCTTATGAGCAGGCTGTTGCTAATGGTGATTCTGAAGTTGTTCTTAAAAAG | 12202 |
| gb:MT106052 | Organism:Severe | GCTCAAGAAGCTTATGAGCAGGCTGTTGCTAATGGTGATTCTGAAGTTGTTCTTAAAAAG | 12202 |
| gb:LC522975 | Organism:Severe | GCTCAAGAAGCTTATGAGCAGGCTGTTGCTAATGGTGATTCTGAAGTTGTTCTTAAAAAG | 12199 |
| gb:LC522973 | Organism:Severe | GCTCAAGAAGCTTATGAGCAGGCTGTTGCTAATGGTGATTCTGAAGTTGTTCTTAAAAAG | 12199 |
| gb:LC522974 | Organism:Severe | GCTCAAGAAGCTTATGAGCAGGCTGTTGCTAATGGTGATTCTGAAGTTGTTCTTAAAAAG | 12199 |
| gb:MN985325 | Organism:Severe | GCTCAAGAAGCTTATGAGCAGGCTGTTGCTAATGGTGATTCTGAAGTTGTTCTTAAAAAG | 12202 |
| gb:MT020881 | Organism:Severe | GCTCAAGAAGCTTATGAGCAGGCTGTTGCTAATGGTGATTCTGAAGTTGTTCTTAAAAAG | 12202 |
| gb:MT020880 | Organism:Severe | GCTCAAGAAGCTTATGAGCAGGCTGTTGCTAATGGTGATTCTGAAGTTGTTCTTAAAAAG | 12202 |
| gb:MT066175 | Organism:Severe | GCTCAAGAAGCTTATGAGCAGGCTGTTGCTAATGGTGATTCTGAAGTTGTTCTTAAAAAG | 12202 |
| gb:MN997409 | Organism:Severe | GCTCAAGAAGCTTATGAGCAGGCTGTTGCTAATGGTGATTCTGAAGTTGTTCTTAAAAAG | 12202 |
| gb:MN938384 | Organism:Severe | GCTCAAGAAGCTTATGAGCAGGCTGTTGCTAATGGTGATTCTGAAGTTGTTCTTAAAAAG | 12170 |
| gb:MT044258 | Organism:Severe | GCTCAAGAAGCTTATGAGCAGGCTGTTGCTAATGGTGATTCTGAAGTTGTTCTTAAAAAG | 12178 |



|             |                 |                                                              |       |
|-------------|-----------------|--------------------------------------------------------------|-------|
| gb:MT106053 | Organism:Severe | TTGAAGAAGTCTTTGAATGTGGCTAAATCTGAATTTGACCGTGATGCAGCCATGCAACGT | 12262 |
| gb:MT019533 | Organism:Severe | TTGAAGAAGTCTTTGAATGTGGCTAAATCTGAATTTGACCGTGATGCAGCCATGCAACGT | 12262 |
| gb:MT019531 | Organism:Severe | TTGAAGAAGTCTTTGAATGTGGCTAAATCTGAATTTGACCGTGATGCAGCCATGCAACGT | 12262 |
| gb:MN996528 | Organism:Severe | TTGAAGAAGTCTTTGAATGTGGCTAAATCTGAATTTGACCGTGATGCAGCCATGCAACGT | 12262 |
| gb:MN996530 | Organism:Severe | TTGAAGAAGTCTTTGAATGTGGCTAAATCTGAATTTGACCGTGATGCAGCCATGCAACGT | 12248 |
| gb:MN908947 | Organism:Severe | TTGAAGAAGTCTTTGAATGTGGCTAAATCTGAATTTGACCGTGATGCAGCCATGCAACGT | 12262 |
| gb:MT019532 | Organism:Severe | TTGAAGAAGTCTTTGAATGTGGCTAAATCTGAATTTGACCGTGATGCAGCCATGCAACGT | 12262 |

\*\*\*\*\*

|             |                 |                                                             |       |
|-------------|-----------------|-------------------------------------------------------------|-------|
| gb:MT020781 | Organism:Severe | AAGTTGGAAAAGATGGCTGATCAAGCTATGACCCAATGTATAAACAGGCTAGATCTGAG | 12310 |
| gb:MT007544 | Organism:Severe | AAGTTGGAAAAGATGGCTGATCAAGCTATGACCCAATGTATAAACAGGCTAGATCTGAG | 12322 |
| gb:MN994467 | Organism:Severe | AAGTTGGAAAAGATGGCTGATCAAGCTATGACCCAATGTATAAACAGGCTAGATCTGAG | 12322 |
| gb:MT044257 | Organism:Severe | AAGTTGGAAAAGATGGCTGATCAAGCTATGACCCAATGTATAAACAGGCTAGATCTGAG | 12322 |
| gb:MT106054 | Organism:Severe | AAGTTGGAAAAGATGGCTGATCAAGCTATGACCCAATGTATAAACAGGCTAGATCTGAG | 12322 |
| gb:MT049951 | Organism:Severe | AAGTTGGAAAAGATGGCTGATCAAGCTATGACCCAATGTATAAACAGGCTAGATCTGAG | 12322 |
| gb:MN975262 | Organism:Severe | AAGTTGGAAAAGATGGCTGATCAAGCTATGACCCAATGTATAAACAGGCTAGATCTGAG | 12322 |
| gb:MT106052 | Organism:Severe | AAGTTGGAAAAGATGGCTGATCAAGCTATGACCCAATGTATAAACAGGCTAGATCTGAG | 12322 |
| gb:LC522975 | Organism:Severe | AAGTTGGAAAAGATGGCTGATCAAGCTATGACCCAATGTATAAACAGGCTAGATCTGAG | 12319 |
| gb:LC522973 | Organism:Severe | AAGTTGGAAAAGATGGCTGATCAAGCTATGACCCAATGTATAAACAGGCTAGATCTGAG | 12319 |
| gb:LC522974 | Organism:Severe | AAGTTGGAAAAGATGGCTGATCAAGCTATGACCCAATGTATAAACAGGCTAGATCTGAG | 12319 |
| gb:MN985325 | Organism:Severe | AAGTTGGAAAAGATGGCTGATCAAGCTATGACCCAATGTATAAACAGGCTAGATCTGAG | 12322 |
| gb:MT020881 | Organism:Severe | AAGTTGGAAAAGATGGCTGATCAAGCTATGACCCAATGTATAAACAGGCTAGATCTGAG | 12322 |
| gb:MT020880 | Organism:Severe | AAGTTGGAAAAGATGGCTGATCAAGCTATGACCCAATGTATAAACAGGCTAGATCTGAG | 12322 |
| gb:MT066175 | Organism:Severe | AAGTTGGAAAAGATGGCTGATCAAGCTATGACCCAATGTATAAACAGGCTAGATCTGAG | 12322 |
| gb:MN997409 | Organism:Severe | AAGTTGGAAAAGATGGCTGATCAAGCTATGACCCAATGTATAAACAGGCTAGATCTGAG | 12322 |
| gb:MN938384 | Organism:Severe | AAGTTGGAAAAGATGGCTGATCAAGCTATGACCCAATGTATAAACAGGCTAGATCTGAG | 12290 |
| gb:MT044258 | Organism:Severe | AAGTTGGAAAAGATGGCTGATCAAGCTATGACCCAATGTATAAACAGGCTAGATCTGAG | 12298 |
| gb:MT039890 | Organism:Severe | AAGTTGGAAAAGATGGCTGATCAAGCTATGACCCAATGTATAAACAGGCTAGATCTGAG | 12322 |
| gb:MN988713 | Organism:Severe | AAGTTGGAAAAGATGGCTGATCAAGCTATGACCCAATGTATAAACAGGCTAGATCTGAG | 12322 |
| gb:LC521925 | Organism:Severe | AAGTTGGAAAAGATGGCTGATCAAGCTATGACCCAATGTATAAACAGGCTAGATCTGAG | 12295 |
| gb:MT093571 | Organism:Severe | AAGTTGGAAAAGATGGCTGATCAAGCTATGACCCAATGTATAAACAGGCTAGATCTGAG | 12322 |
| gb:MT039887 | Organism:Severe | AAGTTGGAAAAGATGGCTGATCAAGCTATGACCCAATGTATAAACAGGCTAGATCTGAG | 12322 |
| gb:MT019530 | Organism:Severe | AAGTTGGAAAAGATGGCTGATCAAGCTATGACCCAATGTATAAACAGGCTAGATCTGAG | 12322 |
| gb:MT039888 | Organism:Severe | AAGTTGGAAAAGATGGCTGATCAAGCTATGACCCAATGTATAAACAGGCTAGATCTGAG | 12322 |
| gb:LC522972 | Organism:Severe | AAGTTGGAAAAGATGGCTGATCAAGCTATGACCCAATGTATAAACAGGCTAGATCTGAG | 12319 |
| gb:MT027063 | Organism:Severe | AAGTTGGAAAAGATGGCTGATCAAGCTATGACCCAATGTATAAACAGGCTAGATCTGAG | 12322 |
| gb:MT027062 | Organism:Severe | AAGTTGGAAAAGATGGCTGATCAAGCTATGACCCAATGTATAAACAGGCTAGATCTGAG | 12322 |
| gb:MT019529 | Organism:Severe | AAGTTGGAAAAGATGGCTGATCAAGCTATGACCCAATGTATAAACAGGCTAGATCTGAG | 12322 |
| gb:MN996529 | Organism:Severe | AAGTTGGAAAAGATGGCTGATCAAGCTATGACCCAATGTATAAACAGGCTAGATCTGAG | 12310 |
| gb:MN996531 | Organism:Severe | AAGTTGGAAAAGATGGCTGATCAAGCTATGACCCAATGTATAAACAGGCTAGATCTGAG | 12309 |
| gb:MT066176 | Organism:Severe | AAGTTGGAAAAGATGGCTGATCAAGCTATGACCCAATGTATAAACAGGCTAGATCTGAG | 12322 |
| gb:MT027064 | Organism:Severe | AAGTTGGAAAAGATGGCTGATCAAGCTATGACCCAATGTATAAACAGGCTAGATCTGAG | 12322 |
| gb:MN994468 | Organism:Severe | AAGTTGGAAAAGATGGCTGATCAAGCTATGACCCAATGTATAAACAGGCTAGATCTGAG | 12322 |
| gb:MT072688 | Organism:Severe | AAGTTGGAAAAGATGGCTGATCAAGCTATGACCCAATGTATAAACAGGCTAGATCTGAG | 12307 |
| gb:MN996527 | Organism:Severe | AAGTTGGAAAAGATGGCTGATCAAGCTATGACCCAATGTATAAACAGGCTAGATCTGAG | 12289 |
| gb:MT093631 | Organism:Severe | AAGTTGGAAAAGATGGCTGATCAAGCTATGACCCAATGTATAAACAGGCTAGATCTGAG | 12360 |
| gb:MT106053 | Organism:Severe | AAGTTGGAAAAGATGGCTGATCAAGCTATGACCCAATGTATAAACAGGCTAGATCTGAG | 12322 |
| gb:MT019533 | Organism:Severe | AAGTTGGAAAAGATGGCTGATCAAGCTATGACCCAATGTATAAACAGGCTAGATCTGAG | 12322 |
| gb:MT019531 | Organism:Severe | AAGTTGGAAAAGATGGCTGATCAAGCTATGACCCAATGTATAAACAGGCTAGATCTGAG | 12322 |
| gb:MN996528 | Organism:Severe | AAGTTGGAAAAGATGGCTGATCAAGCTATGACCCAATGTATAAACAGGCTAGATCTGAG | 12322 |
| gb:MN996530 | Organism:Severe | AAGTTGGAAAAGATGGCTGATCAAGCTATGACCCAATGTATAAACAGGCTAGATCTGAG | 12308 |
| gb:MN908947 | Organism:Severe | AAGTTGGAAAAGATGGCTGATCAAGCTATGACCCAATGTATAAACAGGCTAGATCTGAG | 12322 |
| gb:MT019532 | Organism:Severe | AAGTTGGAAAAGATGGCTGATCAAGCTATGACCCAATGTATAAACAGGCTAGATCTGAG | 12322 |

\*\*\*\*\*

|             |                 |                                                            |       |
|-------------|-----------------|------------------------------------------------------------|-------|
| gb:MT020781 | Organism:Severe | GACAAGAGGGCAAAGTTACTAGTGTATGCAGACAATGCTTTTACTATGCTTAGAAAAG | 12370 |
| gb:MT007544 | Organism:Severe | GACAAGAGGGCAAAGTTACTAGTGTATGCAGACAATGCTTTTACTATGCTTAGAAAAG | 12382 |
| gb:MN994467 | Organism:Severe | GACAAGAGGGCAAAGTTACTAGTGTATGCAGACAATGCTTTTACTATGCTTAGAAAAG | 12382 |
| gb:MT044257 | Organism:Severe | GACAAGAGGGCAAAGTTACTAGTGTATGCAGACAATGCTTTTACTATGCTTAGAAAAG | 12382 |
| gb:MT106054 | Organism:Severe | GACAAGAGGGCAAAGTTACTAGTGTATGCAGACAATGCTTTTACTATGCTTAGAAAAG | 12382 |
| gb:MT049951 | Organism:Severe | GACAAGAGGGCAAAGTTACTAGTGTATGCAGACAATGCTTTTACTATGCTTAGAAAAG | 12382 |
| gb:MN975262 | Organism:Severe | GACAAGAGGGCAAAGTTACTAGTGTATGCAGACAATGCTTTTACTATGCTTAGAAAAG | 12382 |
| gb:MT106052 | Organism:Severe | GACAAGAGGGCAAAGTTACTAGTGTATGCAGACAATGCTTTTACTATGCTTAGAAAAG | 12382 |
| gb:LC522975 | Organism:Severe | GACAAGAGGGCAAAGTTACTAGTGTATGCAGACAATGCTTTTACTATGCTTAGAAAAG | 12379 |
| gb:LC522973 | Organism:Severe | GACAAGAGGGCAAAGTTACTAGTGTATGCAGACAATGCTTTTACTATGCTTAGAAAAG | 12379 |

|             |                 |                                                            |       |
|-------------|-----------------|------------------------------------------------------------|-------|
| gb:LC522974 | Organism:Severe | GACAAGAGGGCAAAGTTACTAGTGCATGCAGACAATGCTTTTACTATGCTTAGAAAAG | 12379 |
| gb:MN985325 | Organism:Severe | GACAAGAGGGCAAAGTTACTAGTGCATGCAGACAATGCTTTTACTATGCTTAGAAAAG | 12382 |
| gb:MT020881 | Organism:Severe | GACAAGAGGGCAAAGTTACTAGTGCATGCAGACAATGCTTTTACTATGCTTAGAAAAG | 12382 |
| gb:MT020880 | Organism:Severe | GACAAGAGGGCAAAGTTACTAGTGCATGCAGACAATGCTTTTACTATGCTTAGAAAAG | 12382 |
| gb:MT066175 | Organism:Severe | GACAAGAGGGCAAAGTTACTAGTGCATGCAGACAATGCTTTTACTATGCTTAGAAAAG | 12382 |
| gb:MN997409 | Organism:Severe | GACAAGAGGGCAAAGTTACTAGTGCATGCAGACAATGCTTTTACTATGCTTAGAAAAG | 12382 |
| gb:MN938384 | Organism:Severe | GACAAGAGGGCAAAGTTACTAGTGCATGCAGACAATGCTTTTACTATGCTTAGAAAAG | 12350 |
| gb:MT044258 | Organism:Severe | GACAAGAGGGCAAAGTTACTAGTGCATGCAGACAATGCTTTTACTATGCTTAGAAAAG | 12358 |
| gb:MT039890 | Organism:Severe | GACAAGAGGGCAAAGTTACTAGTGCATGCAGACAATGCTTTTACTATGCTTAGAAAAG | 12382 |
| gb:MN988713 | Organism:Severe | GACAAGAGGGCAAAGTTACTAGTGCATGCAGACAATGCTTTTACTATGCTTAGAAAAG | 12382 |
| gb:LC521925 | Organism:Severe | GACAAGAGGGCAAAGTTACTAGTGCATGCAGACAATGCTTTTACTATGCTTAGAAAAG | 12355 |
| gb:MT093571 | Organism:Severe | GACAAGAGGGCAAAGTTACTAGTGCATGCAGACAATGCTTTTACTATGCTTAGAAAAG | 12382 |
| gb:MT039887 | Organism:Severe | GACAAGAGGGCAAAGTTACTAGTGCATGCAGACAATGCTTTTACTATGCTTAGAAAAG | 12382 |
| gb:MT019530 | Organism:Severe | GACAAGAGGGCAAAGTTACTAGTGCATGCAGACAATGCTTTTACTATGCTTAGAAAAG | 12382 |
| gb:MT039888 | Organism:Severe | GACAAGAGGGCAAAGTTACTAGTGCATGCAGACAATGCTTTTACTATGCTTAGAAAAG | 12382 |
| gb:LC522972 | Organism:Severe | GACAAGAGGGCAAAGTTACTAGTGCATGCAGACAATGCTTTTACTATGCTTAGAAAAG | 12379 |
| gb:MT027063 | Organism:Severe | GACAAGAGGGCAAAGTTACTAGTGCATGCAGACAATGCTTTTACTATGCTTAGAAAAG | 12382 |
| gb:MT027062 | Organism:Severe | GACAAGAGGGCAAAGTTACTAGTGCATGCAGACAATGCTTTTACTATGCTTAGAAAAG | 12382 |
| gb:MT019529 | Organism:Severe | GACAAGAGGGCAAAGTTACTAGTGCATGCAGACAATGCTTTTACTATGCTTAGAAAAG | 12382 |
| gb:MN996529 | Organism:Severe | GACAAGAGGGCAAAGTTACTAGTGCATGCAGACAATGCTTTTACTATGCTTAGAAAAG | 12370 |
| gb:MN996531 | Organism:Severe | GACAAGAGGGCAAAGTTACTAGTGCATGCAGACAATGCTTTTACTATGCTTAGAAAAG | 12369 |
| gb:MT066176 | Organism:Severe | GACAAGAGGGCAAAGTTACTAGTGCATGCAGACAATGCTTTTACTATGCTTAGAAAAG | 12382 |
| gb:MT027064 | Organism:Severe | GACAAGAGGGCAAAGTTACTAGTGCATGCAGACAATGCTTTTACTATGCTTAGAAAAG | 12382 |
| gb:MN994468 | Organism:Severe | GACAAGAGGGCAAAGTTACTAGTGCATGCAGACAATGCTTTTACTATGCTTAGAAAAG | 12382 |
| gb:MT072688 | Organism:Severe | GACAAGAGGGCAAAGTTACTAGTGCATGCAGACAATGCTTTTACTATGCTTAGAAAAG | 12367 |
| gb:MN996527 | Organism:Severe | GACAAGAGGGCAAAGTTACTAGTGCATGCAGACAATGCTTTTACTATGCTTAGAAAAG | 12349 |
| gb:MT093631 | Organism:Severe | GACAAGAGGGCAAAGTTACTAGTGCATGCAGACAATGCTTTTACTATGCTTAGAAAAG | 12420 |
| gb:MT106053 | Organism:Severe | GACAAGAGGGCAAAGTTACTAGTGCATGCAGACAATGCTTTTACTATGCTTAGAAAAG | 12382 |
| gb:MT019533 | Organism:Severe | GACAAGAGGGCAAAGTTACTAGTGCATGCAGACAATGCTTTTACTATGCTTAGAAAAG | 12382 |
| gb:MT019531 | Organism:Severe | GACAAGAGGGCAAAGTTACTAGTGCATGCAGACAATGCTTTTACTATGCTTAGAAAAG | 12382 |
| gb:MN996528 | Organism:Severe | GACAAGAGGGCAAAGTTACTAGTGCATGCAGACAATGCTTTTACTATGCTTAGAAAAG | 12382 |
| gb:MN996530 | Organism:Severe | GACAAGAGGGCAAAGTTACTAGTGCATGCAGACAATGCTTTTACTATGCTTAGAAAAG | 12368 |
| gb:MN908947 | Organism:Severe | GACAAGAGGGCAAAGTTACTAGTGCATGCAGACAATGCTTTTACTATGCTTAGAAAAG | 12382 |
| gb:MT019532 | Organism:Severe | GACAAGAGGGCAAAGTTACTAGTGCATGCAGACAATGCTTTTACTATGCTTAGAAAAG | 12382 |

\*\*\*\*\*

|             |                 |                                                              |       |
|-------------|-----------------|--------------------------------------------------------------|-------|
| gb:MT020781 | Organism:Severe | TTGGATAATGATGCACTCAACAACATTATCAACAATGCAAGAGATGGTTGTGTTCCCTTG | 12430 |
| gb:MT007544 | Organism:Severe | TTGGATAATGATGCACTCAACAACATTATCAACAATGCAAGAGATGGTTGTGTTCCCTTG | 12442 |
| gb:MN994467 | Organism:Severe | TTGGATAATGATGCACTCAACAACATTATCAACAATGCAAGAGATGGTTGTGTTCCCTTG | 12442 |
| gb:MT044257 | Organism:Severe | TTGGATAATGATGCACTCAACAACATTATCAACAATGCAAGAGATGGTTGTGTTCCCTTG | 12442 |
| gb:MT106054 | Organism:Severe | TTGGATAATGATGCACTCAACAACATTATCAACAATGCAAGAGATGGTTGTGTTCCCTTG | 12442 |
| gb:MT049951 | Organism:Severe | TTGGATAATGATGCACTCAACAACATTATCAACAATGCAAGAGATGGTTGTGTTCCCTTG | 12442 |
| gb:MN975262 | Organism:Severe | TTGGATAATGATGCACTCAACAACATTATCAACAATGCAAGAGATGGTTGTGTTCCCTTG | 12442 |
| gb:MT106052 | Organism:Severe | TTGGATAATGATGCACTCAACAACATTATCAACAATGCAAGAGATGGTTGTGTTCCCTTG | 12442 |
| gb:LC522975 | Organism:Severe | TTGGATAATGATGCACTCAACAACATTATCAACAATGCAAGAGATGGTTGTGTTCCCTTG | 12439 |
| gb:LC522973 | Organism:Severe | TTGGATAATGATGCACTCAACAACATTATCAACAATGCAAGAGATGGTTGTGTTCCCTTG | 12439 |
| gb:LC522974 | Organism:Severe | TTGGATAATGATGCACTCAACAACATTATCAACAATGCAAGAGATGGTTGTGTTCCCTTG | 12439 |
| gb:MN985325 | Organism:Severe | TTGGATAATGATGCACTCAACAACATTATCAACAATGCAAGAGATGGTTGTGTTCCCTTG | 12442 |
| gb:MT020881 | Organism:Severe | TTGGATAATGATGCACTCAACAACATTATCAACAATGCAAGAGATGGTTGTGTTCCCTTG | 12442 |
| gb:MT020880 | Organism:Severe | TTGGATAATGATGCACTCAACAACATTATCAACAATGCAAGAGATGGTTGTGTTCCCTTG | 12442 |
| gb:MT066175 | Organism:Severe | TTGGATAATGATGCACTCAACAACATTATCAACAATGCAAGAGATGGTTGTGTTCCCTTG | 12442 |
| gb:MN997409 | Organism:Severe | TTGGATAATGATGCACTCAACAACATTATCAACAATGCAAGAGATGGTTGTGTTCCCTTG | 12442 |
| gb:MN938384 | Organism:Severe | TTGGATAATGATGCACTCAACAACATTATCAACAATGCAAGAGATGGTTGTGTTCCCTTG | 12410 |
| gb:MT044258 | Organism:Severe | TTGGATAATGATGCACTCAACAACATTATCAACAATGCAAGAGATGGTTGTGTTCCCTTG | 12418 |
| gb:MT039890 | Organism:Severe | TTGGATAATGATGCACTCAACAACATTATCAACAATGCAAGAGATGGTTGTGTTCCCTTG | 12442 |
| gb:MN988713 | Organism:Severe | TTGGATAATGATGCACTCAACAACATTATCAACAATGCAAGAGATGGTTGTGTTCCCTTG | 12442 |
| gb:LC521925 | Organism:Severe | TTGGATAATGATGCACTCAACAACATTATCAACAATGCAAGAGATGGTTGTGTTCCCTTG | 12415 |
| gb:MT093571 | Organism:Severe | TTGGATAATGATGCACTCAACAACATTATCAACAATGCAAGAGATGGTTGTGTTCCCTTG | 12442 |
| gb:MT039887 | Organism:Severe | TTGGATAATGATGCACTCAACAACATTATCAACAATGCAAGAGATGGTTGTGTTCCCTTG | 12442 |
| gb:MT019530 | Organism:Severe | TTGGATAATGATGCACTCAACAACATTATCAACAATGCAAGAGATGGTTGTGTTCCCTTG | 12442 |
| gb:MT039888 | Organism:Severe | TTGGATAATGATGCACTCAACAACATTATCAACAATGCAAGAGATGGTTGTGTTCCCTTG | 12442 |
| gb:LC522972 | Organism:Severe | TTGGATAATGATGCACTCAACAACATTATCAACAATGCAAGAGATGGTTGTGTTCCCTTG | 12439 |
| gb:MT027063 | Organism:Severe | TTGGATAATGATGCACTCAACAACATTATCAACAATGCAAGAGATGGTTGTGTTCCCTTG | 12442 |
| gb:MT027062 | Organism:Severe | TTGGATAATGATGCACTCAACAACATTATCAACAATGCAAGAGATGGTTGTGTTCCCTTG | 12442 |
| gb:MT019529 | Organism:Severe | TTGGATAATGATGCACTCAACAACATTATCAACAATGCAAGAGATGGTTGTGTTCCCTTG | 12442 |

|             |                 |                                                              |       |
|-------------|-----------------|--------------------------------------------------------------|-------|
| gb:MN996529 | Organism:Severe | TTGGATAATGATGCACTCAACAACATTATCAACAATGCAAGAGATGGTTGTGTTCCCTTG | 12430 |
| gb:MN996531 | Organism:Severe | TTGGATAATGATGCACTCAACAACATTATCAACAATGCAAGAGATGGTTGTGTTCCCTTG | 12429 |
| gb:MT066176 | Organism:Severe | TTGGATAATGATGCACTCAACAACATTATCAACAATGCAAGAGATGGTTGTGTTCCCTTG | 12442 |
| gb:MT027064 | Organism:Severe | TTGGATAATGATGCACTCAACAACATTATCAACAATGCAAGAGATGGTTGTGTTCCCTTG | 12442 |
| gb:MN994468 | Organism:Severe | TTGGATAATGATGCACTCAACAACATTATCAACAATGCAAGAGATGGTTGTGTTCCCTTG | 12442 |
| gb:MT072688 | Organism:Severe | TTGGATAATGATGCACTCAACAACATTATCAACAATGCAAGAGATGGTTGTGTTCCCTTG | 12427 |
| gb:MN996527 | Organism:Severe | TTGGATAATGATGCACTCAACAACATTATCAACAATGCAAGAGATGGTTGTGTTCCCTTG | 12409 |
| gb:MT093631 | Organism:Severe | TTGGATAATGATGCACTCAACAACATTATCAACAATGCAAGAGATGGTTGTGTTCCCTTG | 12480 |
| gb:MT106053 | Organism:Severe | TTGGATAATGATGCACTCAACAACATTATCAACAATGCAAGAGATGGTTGTGTTCCCTTG | 12442 |
| gb:MT019533 | Organism:Severe | TTGGATAATGATGCACTCAACAACATTATCAACAATGCAAGAGATGGTTGTGTTCCCTTG | 12442 |
| gb:MT019531 | Organism:Severe | TTGGATAATGATGCACTCAACAACATTATCAACAATGCAAGAGATGGTTGTGTTCCCTTG | 12442 |
| gb:MN996528 | Organism:Severe | TTGGATAATGATGCACTCAACAACATTATCAACAATGCAAGAGATGGTTGTGTTCCCTTG | 12442 |
| gb:MN996530 | Organism:Severe | TTGGATAATGATGCACTCAACAACATTATCAACAATGCAAGAGATGGTTGTGTTCCCTTG | 12428 |
| gb:MN908947 | Organism:Severe | TTGGATAATGATGCACTCAACAACATTATCAACAATGCAAGAGATGGTTGTGTTCCCTTG | 12442 |
| gb:MT019532 | Organism:Severe | TTGGATAATGATGCACTCAACAACATTATCAACAATGCAAGAGATGGTTGTGTTCCCTTG | 12442 |

\*\*\*\*\*

|             |                 |                                                              |       |
|-------------|-----------------|--------------------------------------------------------------|-------|
| gb:MT020781 | Organism:Severe | AACATAATACCTCTTACAACAGCAGCCAAACTAATGGTTGTCATACCAGACTATAACACA | 12490 |
| gb:MT007544 | Organism:Severe | AACATAATACCTCTTACAACAGCAGCCAAACTAATGGTTGTCATACCAGACTATAACACA | 12502 |
| gb:MN994467 | Organism:Severe | AACATAATACCTCTTACAACAGCAGCCAAACTAATGGTTGTCATACCAGACTATAACACA | 12502 |
| gb:MT044257 | Organism:Severe | AACATAATACCTCTTACAACAGCAGCCAAACTAATGGTTGTCATACCAGACTATAACACA | 12502 |
| gb:MT106054 | Organism:Severe | AACATAATACCTCTTACAACAGCAGCCAAACTAATGGTTGTCATACCAGACTATAACACA | 12502 |
| gb:MT049951 | Organism:Severe | AACATAATACCTCTTACAACAGCAGCCAAACTAATGGTTGTCATACCAGACTATAACACA | 12502 |
| gb:MN975262 | Organism:Severe | AACATAATACCTCTTACAACAGCAGCCAAACTAATGGTTGTCATACCAGACTATAACACA | 12502 |
| gb:MT106052 | Organism:Severe | AACATAATACCTCTTACAACAGCAGCCAAACTAATGGTTGTCATACCAGACTATAACACA | 12502 |
| gb:LC522975 | Organism:Severe | AACATAATACCTCTTACAACAGCAGCCAAACTAATGGTTGTCATACCAGACTATAACACA | 12499 |
| gb:LC522973 | Organism:Severe | AACATAATACCTCTTACAACAGCAGCCAAACTAATGGTTGTCATACCAGACTATAACACA | 12499 |
| gb:LC522974 | Organism:Severe | AACATAATACCTCTTACAACAGCAGCCAAACTAATGGTTGTCATACCAGACTATAACACA | 12499 |
| gb:MN985325 | Organism:Severe | AACATAATACCTCTTACAACAGCAGCCAAACTAATGGTTGTCATACCAGACTATAACACA | 12502 |
| gb:MT020881 | Organism:Severe | AACATAATACCTCTTACAACAGCAGCCAAACTAATGGTTGTCATACCAGACTATAACACA | 12502 |
| gb:MT020880 | Organism:Severe | AACATAATACCTCTTACAACAGCAGCCAAACTAATGGTTGTCATACCAGACTATAACACA | 12502 |
| gb:MT066175 | Organism:Severe | AACATAATACCTCTTACAACAGCAGCCAAACTAATGGTTGTCATACCAGACTATAACACA | 12502 |
| gb:MN997409 | Organism:Severe | AACATAATACCTCTTACAACAGCAGCCAAACTAATGGTTGTCATACCAGACTATAACACA | 12502 |
| gb:MN938384 | Organism:Severe | AACATAATACCTCTTACAACAGCAGCCAAACTAATGGTTGTCATACCAGACTATAACACA | 12470 |
| gb:MT044258 | Organism:Severe | AACATAATACCTCTTACAACAGCAGCCAAACTAATGGTTGTCATACCAGACTATAACACA | 12478 |
| gb:MT039890 | Organism:Severe | AACATAATACCTCTTACAACAGCAGCCAAACTAATGGTTGTCATACCAGACTATAACACA | 12502 |
| gb:MN988713 | Organism:Severe | AACATAATACCTCTTACAACAGCAGCCAAACTAATGGTTGTCATACCAGACTATAACACA | 12502 |
| gb:LC521925 | Organism:Severe | AACATAATACCTCTTACAACAGCAGCCAAACTAATGGTTGTCATACCAGACTATAACACA | 12475 |
| gb:MT093571 | Organism:Severe | AACATAATACCTCTTACAACAGCAGCCAAACTAATGGTTGTCATACCAGACTATAACACA | 12502 |
| gb:MT039887 | Organism:Severe | AACATAATACCTCTTACAACAGCAGCCAAACTAATGGTTGTCATACCAGACTATAACACA | 12502 |
| gb:MT019530 | Organism:Severe | AACATAATACCTCTTACAACAGCAGCCAAACTAATGGTTGTCATACCAGACTATAACACA | 12502 |
| gb:MT039888 | Organism:Severe | AACATAATACCTCTTACAACAGCAGCCAAACTAATGGTTGTCATACCAGACTATAACACA | 12502 |
| gb:LC522972 | Organism:Severe | AACATAATACCTCTTACAACAGCAGCCAAACTAATGGTTGTCATACCAGACTATAACACA | 12499 |
| gb:MT027063 | Organism:Severe | AACATAATACCTCTTACAACAGCAGCCAAACTAATGGTTGTCATACCAGACTATAACACA | 12502 |
| gb:MT027062 | Organism:Severe | AACATAATACCTCTTACAACAGCAGCCAAACTAATGGTTGTCATACCAGACTATAACACA | 12502 |
| gb:MT019529 | Organism:Severe | AACATAATACCTCTTACAACAGCAGCCAAACTAATGGTTGTCATACCAGACTATAACACA | 12502 |
| gb:MN996529 | Organism:Severe | AACATAATACCTCTTACAACAGCAGCCAAACTAATGGTTGTCATACCAGACTATAACACA | 12490 |
| gb:MN996531 | Organism:Severe | AACATAATACCTCTTACAACAGCAGCCAAACTAATGGTTGTCATACCAGACTATAACACA | 12489 |
| gb:MT066176 | Organism:Severe | AACATAATACCTCTTACAACAGCAGCCAAACTAATGGTTGTCATACCAGACTATAACACA | 12502 |
| gb:MT027064 | Organism:Severe | AACATAATACCTCTTACAACAGCAGCCAAACTAATGGTTGTCATACCAGACTATAACACA | 12502 |
| gb:MN994468 | Organism:Severe | AACATAATACCTCTTACAACAGCAGCCAAACTAATGGTTGTCATACCAGACTATAACACA | 12502 |
| gb:MT072688 | Organism:Severe | AACATAATACCTCTTACAACAGCAGCCAAACTAATGGTTGTCATACCAGACTATAACACA | 12487 |
| gb:MN996527 | Organism:Severe | AACATAATACCTCTTACAACAGCAGCCAAACTAATGGTTGTCATACCAGACTATAACACA | 12469 |
| gb:MT093631 | Organism:Severe | AACATAATACCTCTTACAACAGCAGCCAAACTAATGGTTGTCATACCAGACTATAACACA | 12540 |
| gb:MT106053 | Organism:Severe | AACATAATACCTCTTACAACAGCAGCCAAACTAATGGTTGTCATACCAGACTATAACACA | 12502 |
| gb:MT019533 | Organism:Severe | AACATAATACCTCTTACAACAGCAGCCAAACTAATGGTTGTCATACCAGACTATAACACA | 12502 |
| gb:MT019531 | Organism:Severe | AACATAATACCTCTTACAACAGCAGCCAAACTAATGGTTGTCATACCAGACTATAACACA | 12502 |
| gb:MN996528 | Organism:Severe | AACATAATACCTCTTACAACAGCAGCCAAACTAATGGTTGTCATACCAGACTATAACACA | 12502 |
| gb:MN996530 | Organism:Severe | AACATAATACCTCTTACAACAGCAGCCAAACTAATGGTTGTCATACCAGACTATAACACA | 12488 |
| gb:MN908947 | Organism:Severe | AACATAATACCTCTTACAACAGCAGCCAAACTAATGGTTGTCATACCAGACTATAACACA | 12502 |
| gb:MT019532 | Organism:Severe | AACATAATACCTCTTACAACAGCAGCCAAACTAATGGTTGTCATACCAGACTATAACACA | 12502 |

\*\*\*\*\*

|             |                 |                                                              |       |
|-------------|-----------------|--------------------------------------------------------------|-------|
| gb:MT020781 | Organism:Severe | TATAAAAATACGTGTGATGGTACAACATTTACTTATGCATCAGCATTGTGGGAAATCCAA | 12550 |
| gb:MT007544 | Organism:Severe | TATAAAAATACGTGTGATGGTACAACATTTACTTATGCATCAGCATTGTGGGAAATCCAA | 12562 |

|             |                 |                                                              |       |
|-------------|-----------------|--------------------------------------------------------------|-------|
| gb:MN994467 | Organism:Severe | TATAAAAATACGTGTGATGGTACAACATTTACTTATGCATCAGCATTGTGGGAAATCCAA | 12562 |
| gb:MT044257 | Organism:Severe | TATAAAAATACGTGTGATGGTACAACATTTACTTATGCATCAGCATTGTGGGAAATCCAA | 12562 |
| gb:MT106054 | Organism:Severe | TATAAAAATACGTGTGATGGTACAACATTTACTTATGCATCAGCATTGTGGGAAATCCAA | 12562 |
| gb:MT049951 | Organism:Severe | TATAAAAATACGTGTGATGGTACAACATTTACTTATGCATCAGCATTGTGGGAAATCCAA | 12562 |
| gb:MN975262 | Organism:Severe | TATAAAAATACGTGTGATGGTACAACATTTACTTATGCATCAGCATTGTGGGAAATCCAA | 12562 |
| gb:MT106052 | Organism:Severe | TATAAAAATACGTGTGATGGTACAACATTTACTTATGCATCAGCATTGTGGGAAATCCAA | 12562 |
| gb:LC522975 | Organism:Severe | TATAAAAATACGTGTGATGGTACAACATTTACTTATGCATCAGCATTGTGGGAAATCCAA | 12559 |
| gb:LC522973 | Organism:Severe | TATAAAAATACGTGTGATGGTACAACATTTACTTATGCATCAGCATTGTGGGAAATCCAA | 12559 |
| gb:LC522974 | Organism:Severe | TATAAAAATACGTGTGATGGTACAACATTTACTTATGCATCAGCATTGTGGGAAATCCAA | 12559 |
| gb:MN985325 | Organism:Severe | TATAAAAATACGTGTGATGGTACAACATTTACTTATGCATCAGCATTGTGGGAAATCCAA | 12562 |
| gb:MT020881 | Organism:Severe | TATAAAAATACGTGTGATGGTACAACATTTACTTATGCATCAGCATTGTGGGAAATCCAA | 12562 |
| gb:MT020880 | Organism:Severe | TATAAAAATACGTGTGATGGTACAACATTTACTTATGCATCAGCATTGTGGGAAATCCAA | 12562 |
| gb:MT066175 | Organism:Severe | TATAAAAATACGTGTGATGGTACAACATTTACTTATGCATCAGCATTGTGGGAAATCCAA | 12562 |
| gb:MN997409 | Organism:Severe | TATAAAAATACGTGTGATGGTACAACATTTACTTATGCATCAGCATTGTGGGAAATCCAA | 12562 |
| gb:MN938384 | Organism:Severe | TATAAAAATACGTGTGATGGTACAACATTTACTTATGCATCAGCATTGTGGGAAATCCAA | 12530 |
| gb:MT044258 | Organism:Severe | TATAAAAATACGTGTGATGGTACAACATTTACTTATGCATCAGCATTGTGGGAAATCCAA | 12538 |
| gb:MT039890 | Organism:Severe | TATAAAAATACGTGTGATGGTACAACATTTACTTATGCATCAGCATTGTGGGAAATCCAA | 12562 |
| gb:MN988713 | Organism:Severe | TATAAAAATACGTGTGATGGTACAACATTTACTTATGCATCAGCATTGTGGGAAATCCAA | 12562 |
| gb:LC521925 | Organism:Severe | TATAAAAATACGTGTGATGGTACAACATTTACTTATGCATCAGCATTGTGGGAAATCCAA | 12535 |
| gb:MT093571 | Organism:Severe | TATAAAAATACGTGTGATGGTACAACATTTACTTATGCATCAGCATTGTGGGAAATCCAA | 12562 |
| gb:MT039887 | Organism:Severe | TATAAAAATACGTGTGATGGTACAACATTTACTTATGCATCAGCATTGTGGGAAATCCAA | 12562 |
| gb:MT019530 | Organism:Severe | TATAAAAATACGTGTGATGGTACAACATTTACTTATGCATCAGCATTGTGGGAAATCCAA | 12562 |
| gb:MT039888 | Organism:Severe | TATAAAAATACGTGTGATGGTACAACATTTACTTATGCATCAGCATTGTGGGAAATCCAA | 12562 |
| gb:LC522972 | Organism:Severe | TATAAAAATACGTGTGATGGTACAACATTTACTTATGCATCAGCATTGTGGGAAATCCAA | 12559 |
| gb:MT027063 | Organism:Severe | TATAAAAATACGTGTGATGGTACAACATTTACTTATGCATCAGCATTGTGGGAAATCCAA | 12562 |
| gb:MT027062 | Organism:Severe | TATAAAAATACGTGTGATGGTACAACATTTACTTATGCATCAGCATTGTGGGAAATCCAA | 12562 |
| gb:MT019529 | Organism:Severe | TATAAAAATACGTGTGATGGTACAACATTTACTTATGCATCAGCATTGTGGGAAATCCAA | 12562 |
| gb:MN996529 | Organism:Severe | TATAAAAATACGTGTGATGGTACAACATTTACTTATGCATCAGCATTGTGGGAAATCCAA | 12550 |
| gb:MN996531 | Organism:Severe | TATAAAAATACGTGTGATGGTACAACATTTACTTATGCATCAGCATTGTGGGAAATCCAA | 12549 |
| gb:MT066176 | Organism:Severe | TATAAAAATACGTGTGATGGTACAACATTTACTTATGCATCAGCATTGTGGGAAATCCAA | 12562 |
| gb:MT027064 | Organism:Severe | TATAAAAATACGTGTGATGGTACAACATTTACTTATGCATCAGCATTGTGGGAAATCCAA | 12562 |
| gb:MN994468 | Organism:Severe | TATAAAAATACGTGTGATGGTACAACATTTACTTATGCATCAGCATTGTGGGAAATCCAA | 12562 |
| gb:MT072688 | Organism:Severe | TATAAAAATACGTGTGATGGTACAACATTTACTTATGCATCAGCATTGTGGGAAATCCAA | 12547 |
| gb:MN996527 | Organism:Severe | TATAAAAATACGTGTGATGGTACAACATTTACTTATGCATCAGCATTGTGGGAAATCCAA | 12529 |
| gb:MT093631 | Organism:Severe | TATAAAAATACGTGTGATGGTACAACATTTACTTATGCATCAGCATTGTGGGAAATCCAA | 12600 |
| gb:MT106053 | Organism:Severe | TATAAAAATACGTGTGATGGTACAACATTTACTTATGCATCAGCATTGTGGGAAATCCAA | 12562 |
| gb:MT019533 | Organism:Severe | TATAAAAATACGTGTGATGGTACAACATTTACTTATGCATCAGCATTGTGGGAAATCCAA | 12562 |
| gb:MT019531 | Organism:Severe | TATAAAAATACGTGTGATGGTACAACATTTACTTATGCATCAGCATTGTGGGAAATCCAA | 12562 |
| gb:MN996528 | Organism:Severe | TATAAAAATACGTGTGATGGTACAACATTTACTTATGCATCAGCATTGTGGGAAATCCAA | 12562 |
| gb:MN996530 | Organism:Severe | TATAAAAATACGTGTGATGGTACAACATTTACTTATGCATCAGCATTGTGGGAAATCCAA | 12548 |
| gb:MN908947 | Organism:Severe | TATAAAAATACGTGTGATGGTACAACATTTACTTATGCATCAGCATTGTGGGAAATCCAA | 12562 |
| gb:MT019532 | Organism:Severe | TATAAAAATACGTGTGATGGTACAACATTTACTTATGCATCAGCATTGTGGGAAATCCAA | 12562 |

\*\*\*\*\*

|             |                 |                                                               |       |
|-------------|-----------------|---------------------------------------------------------------|-------|
| gb:MT020781 | Organism:Severe | CAGGTTGTAGATGCAGATAGTAAAATTTGTTCAACTTAGTGAAATTAGTATGGACAATTCA | 12610 |
| gb:MT007544 | Organism:Severe | CAGGTTGTAGATGCAGATAGTAAAATTTGTTCAACTTAGTGAAATTAGTATGGACAATTCA | 12622 |
| gb:MN994467 | Organism:Severe | CAGGTTGTAGATGCAGATAGTAAAATTTGTTCAACTTAGTGAAATTAGTATGGACAATTCA | 12622 |
| gb:MT044257 | Organism:Severe | CAGGTTGTAGATGCAGATAGTAAAATTTGTTCAACTTAGTGAAATTAGTATGGACAATTCA | 12622 |
| gb:MT106054 | Organism:Severe | CAGGTTGTAGATGCAGATAGTAAAATTTGTTCAACTTAGTGAAATTAGTATGGACAATTCA | 12622 |
| gb:MT049951 | Organism:Severe | CAGGTTGTAGATGCAGATAGTAAAATTTGTTCAACTTAGTGAAATTAGTATGGACAATTCA | 12622 |
| gb:MN975262 | Organism:Severe | CAGGTTGTAGATGCAGATAGTAAAATTTGTTCAACTTAGTGAAATTAGTATGGACAATTCA | 12622 |
| gb:MT106052 | Organism:Severe | CAGGTTGTAGATGCAGATAGTAAAATTTGTTCAACTTAGTGAAATTAGTATGGACAATTCA | 12622 |
| gb:LC522975 | Organism:Severe | CAGGTTGTAGATGCAGATAGTAAAATTTGTTCAACTTAGTGAAATTAGTATGGACAATTCA | 12619 |
| gb:LC522973 | Organism:Severe | CAGGTTGTAGATGCAGATAGTAAAATTTGTTCAACTTAGTGAAATTAGTATGGACAATTCA | 12619 |
| gb:LC522974 | Organism:Severe | CAGGTTGTAGATGCAGATAGTAAAATTTGTTCAACTTAGTGAAATTAGTATGGACAATTCA | 12619 |
| gb:MN985325 | Organism:Severe | CAGGTTGTAGATGCAGATAGTAAAATTTGTTCAACTTAGTGAAATTAGTATGGACAATTCA | 12622 |
| gb:MT020881 | Organism:Severe | CAGGTTGTAGATGCAGATAGTAAAATTTGTTCAACTTAGTGAAATTAGTATGGACAATTCA | 12622 |
| gb:MT020880 | Organism:Severe | CAGGTTGTAGATGCAGATAGTAAAATTTGTTCAACTTAGTGAAATTAGTATGGACAATTCA | 12622 |
| gb:MT066175 | Organism:Severe | CAGGTTGTAGATGCAGATAGTAAAATTTGTTCAACTTAGTGAAATTAGTATGGACAATTCA | 12622 |
| gb:MN997409 | Organism:Severe | CAGGTTGTAGATGCAGATAGTAAAATTTGTTCAACTTAGTGAAATTAGTATGGACAATTCA | 12622 |
| gb:MN938384 | Organism:Severe | CAGGTTGTAGATGCAGATAGTAAAATTTGTTCAACTTAGTGAAATTAGTATGGACAATTCA | 12590 |
| gb:MT044258 | Organism:Severe | CAGGTTGTAGATGCAGATAGTAAAATTTGTTCAACTTAGTGAAATTAGTATGGACAATTCA | 12598 |
| gb:MT039890 | Organism:Severe | CAGGTTGTAGATGCAGATAGTAAAATTTGTTCAACTTAGTGAAATTAGTATGGACAATTCA | 12622 |
| gb:MN988713 | Organism:Severe | CAGGTTGTAGATGCAGATAGTAAAATTTGTTCAACTTAGTGAAATTAGTATGGACAATTCA | 12622 |
| gb:LC521925 | Organism:Severe | CAGGTTGTAGATGCAGATAGTAAAATTTGTTCAACTTAGTGAAATTAGTATGGACAATTCA | 12595 |



|             |                  |                                                              |       |
|-------------|------------------|--------------------------------------------------------------|-------|
| gb:MN996528 | Organism: Severe | CCTAATTTAGCATGGCCTCTTATTGTAACAGCTTTAAGGGCCAATTCTGCTGTCAAATTA | 12682 |
| gb:MN996530 | Organism: Severe | CCTAATTTAGCATGGCCTCTTATTGTAACAGCTTTAAGGGCCAATTCTGCTGTCAAATTA | 12668 |
| gb:MN908947 | Organism: Severe | CCTAATTTAGCATGGCCTCTTATTGTAACAGCTTTAAGGGCCAATTCTGCTGTCAAATTA | 12682 |
| gb:MT019532 | Organism: Severe | CCTAATTTAGCATGGCCTCTTATTGTAACAGCTTTAAGGGCCAATTCTGCTGTCAAATTA | 12682 |
| *****       |                  |                                                              |       |
| gb:MT020781 | Organism: Severe | CAGAATAATGAGCTTAGTCCTGTTGCACTACGACAGATGCTTTGTGCTGCCGGTACTACA | 12730 |
| gb:MT007544 | Organism: Severe | CAGAATAATGAGCTTAGTCCTGTTGCACTACGACAGATGCTTTGTGCTGCCGGTACTACA | 12742 |
| gb:MN994467 | Organism: Severe | CAGAATAATGAGCTTAGTCCTGTTGCACTACGACAGATGCTTTGTGCTGCCGGTACTACA | 12742 |
| gb:MT044257 | Organism: Severe | CAGAATAATGAGCTTAGTCCTGTTGCACTACGACAGATGCTTTGTGCTGCCGGTACTACA | 12742 |
| gb:MT106054 | Organism: Severe | CAGAATAATGAGCTTAGTCCTGTTGCACTACGACAGATGCTTTGTGCTGCCGGTACTACA | 12742 |
| gb:MT049951 | Organism: Severe | CAGAATAATGAGCTTAGTCCTGTTGCACTACGACAGATGCTTTGTGCTGCCGGTACTACA | 12742 |
| gb:MN975262 | Organism: Severe | CAGAATAATGAGCTTAGTCCTGTTGCACTACGACAGATGCTTTGTGCTGCCGGTACTACA | 12742 |
| gb:MT106052 | Organism: Severe | CAGAATAATGAGCTTAGTCCTGTTGCACTACGACAGATGCTTTGTGCTGCCGGTACTACA | 12742 |
| gb:LC522975 | Organism: Severe | CAGAATAATGAGCTTAGTCCTGTTGCACTACGACAGATGCTTTGTGCTGCCGGTACTACA | 12739 |
| gb:LC522973 | Organism: Severe | CAGAATAATGAGCTTAGTCCTGTTGCACTACGACAGATGCTTTGTGCTGCCGGTACTACA | 12739 |
| gb:LC522974 | Organism: Severe | CAGAATAATGAGCTTAGTCCTGTTGCACTACGACAGATGCTTTGTGCTGCCGGTACTACA | 12739 |
| gb:MN985325 | Organism: Severe | CAGAATAATGAGCTTAGTCCTGTTGCACTACGACAGATGCTTTGTGCTGCCGGTACTACA | 12742 |
| gb:MT020881 | Organism: Severe | CAGAATAATGAGCTTAGTCCTGTTGCACTACGACAGATGCTTTGTGCTGCCGGTACTACA | 12742 |
| gb:MT020880 | Organism: Severe | CAGAATAATGAGCTTAGTCCTGTTGCACTACGACAGATGCTTTGTGCTGCCGGTACTACA | 12742 |
| gb:MT066175 | Organism: Severe | CAGAATAATGAGCTTAGTCCTGTTGCACTACGACAGATGCTTTGTGCTGCCGGTACTACA | 12742 |
| gb:MN997409 | Organism: Severe | CAGAATAATGAGCTTAGTCCTGTTGCACTACGACAGATGCTTTGTGCTGCCGGTACTACA | 12742 |
| gb:MN938384 | Organism: Severe | CAGAATAATGAGCTTAGTCCTGTTGCACTACGACAGATGCTTTGTGCTGCCGGTACTACA | 12710 |
| gb:MT044258 | Organism: Severe | CAGAATAATGAGCTTAGTCCTGTTGCACTACGACAGATGCTTTGTGCTGCCGGTACTACA | 12718 |
| gb:MT039890 | Organism: Severe | CAGAATAATGAGCTTAGTCCTGTTGCACTACGACAGATGCTTTGTGCTGCCGGTACTACA | 12742 |
| gb:MN988713 | Organism: Severe | CAGAATAATGAGCTTAGTCCTGTTGCACTACGACAGATGCTTTGTGCTGCCGGTACTACA | 12742 |
| gb:LC521925 | Organism: Severe | CAGAATAATGAGCTTAGTCCTGTTGCACTACGACAGATGCTTTGTGCTGCCGGTACTACA | 12715 |
| gb:MT093571 | Organism: Severe | CAGAATAATGAGCTTAGTCCTGTTGCACTACGACAGATGCTTTGTGCTGCCGGTACTACA | 12742 |
| gb:MT039887 | Organism: Severe | CAGAATAATGAGCTTAGTCCTGTTGCACTACGACAGATGCTTTGTGCTGCCGGTACTACA | 12742 |
| gb:MT019530 | Organism: Severe | CAGAATAATGAGCTTAGTCCTGTTGCACTACGACAGATGCTTTGTGCTGCCGGTACTACA | 12742 |
| gb:MT039888 | Organism: Severe | CAGAATAATGAGCTTAGTCCTGTTGCACTACGACAGATGCTTTGTGCTGCCGGTACTACA | 12742 |
| gb:LC522972 | Organism: Severe | CAGAATAATGAGCTTAGTCCTGTTGCACTACGACAGATGCTTTGTGCTGCCGGTACTACA | 12739 |
| gb:MT027063 | Organism: Severe | CAGAATAATGAGCTTAGTCCTGTTGCACTACGACAGATGCTTTGTGCTGCCGGTACTACA | 12742 |
| gb:MT027062 | Organism: Severe | CAGAATAATGAGCTTAGTCCTGTTGCACTACGACAGATGCTTTGTGCTGCCGGTACTACA | 12742 |
| gb:MT019529 | Organism: Severe | CAGAATAATGAGCTTAGTCCTGTTGCACTACGACAGATGCTTTGTGCTGCCGGTACTACA | 12742 |
| gb:MN996529 | Organism: Severe | CAGAATAATGAGCTTAGTCCTGTTGCACTACGACAGATGCTTTGTGCTGCCGGTACTACA | 12730 |
| gb:MN996531 | Organism: Severe | CAGAATAATGAGCTTAGTCCTGTTGCACTACGACAGATGCTTTGTGCTGCCGGTACTACA | 12729 |
| gb:MT066176 | Organism: Severe | CAGAATAATGAGCTTAGTCCTGTTGCACTACGACAGATGCTTTGTGCTGCCGGTACTACA | 12742 |
| gb:MT027064 | Organism: Severe | CAGAATAATGAGCTTAGTCCTGTTGCACTACGACAGATGCTTTGTGCTGCCGGTACTACA | 12742 |
| gb:MN994468 | Organism: Severe | CAGAATAATGAGCTTAGTCCTGTTGCACTACGACAGATGCTTTGTGCTGCCGGTACTACA | 12742 |
| gb:MT072688 | Organism: Severe | CAGAATAATGAGCTTAGTCCTGTTGCACTACGACAGATGCTTTGTGCTGCCGGTACTACA | 12727 |
| gb:MN996527 | Organism: Severe | CAGAATAATGAGCTTAGTCCTGTTGCACTACGACAGATGCTTTGTGCTGCCGGTACTACA | 12709 |
| gb:MT093631 | Organism: Severe | CAGAATAATGAGCTTAGTCCTGTTGCACTACGACAGATGCTTTGTGCTGCCGGTACTACA | 12780 |
| gb:MT106053 | Organism: Severe | CAGAATAATGAGCTTAGTCCTGTTGCACTACGACAGATGCTTTGTGCTGCCGGTACTACA | 12742 |
| gb:MT019533 | Organism: Severe | CAGAATAATGAGCTTAGTCCTGTTGCACTACGACAGATGCTTTGTGCTGCCGGTACTACA | 12742 |
| gb:MT019531 | Organism: Severe | CAGAATAATGAGCTTAGTCCTGTTGCACTACGACAGATGCTTTGTGCTGCCGGTACTACA | 12742 |
| gb:MN996528 | Organism: Severe | CAGAATAATGAGCTTAGTCCTGTTGCACTACGACAGATGCTTTGTGCTGCCGGTACTACA | 12742 |
| gb:MN996530 | Organism: Severe | CAGAATAATGAGCTTAGTCCTGTTGCACTACGACAGATGCTTTGTGCTGCCGGTACTACA | 12728 |
| gb:MN908947 | Organism: Severe | CAGAATAATGAGCTTAGTCCTGTTGCACTACGACAGATGCTTTGTGCTGCCGGTACTACA | 12742 |
| gb:MT019532 | Organism: Severe | CAGAATAATGAGCTTAGTCCTGTTGCACTACGACAGATGCTTTGTGCTGCCGGTACTACA | 12742 |
| *****       |                  |                                                              |       |
| gb:MT020781 | Organism: Severe | CAAACCTGCTTGCACTGATGACAATGCGTTAGCTTACTACAACACAACAAGGGAGGTAGG | 12790 |
| gb:MT007544 | Organism: Severe | CAAACCTGCTTGCACTGATGACAATGCGTTAGCTTACTACAACACAACAAGGGAGGTAGG | 12802 |
| gb:MN994467 | Organism: Severe | CAAACCTGCTTGCACTGATGACAATGCGTTAGCTTACTACAACACAACAAGGGAGGTAGG | 12802 |
| gb:MT044257 | Organism: Severe | CAAACCTGCTTGCACTGATGACAATGCGTTAGCTTACTACAACACAACAAGGGAGGTAGG | 12802 |
| gb:MT106054 | Organism: Severe | CAAACCTGCTTGCACTGATGACAATGCGTTAGCTTACTACAACACAACAAGGGAGGTAGG | 12802 |
| gb:MT049951 | Organism: Severe | CAAACCTGCTTGCACTGATGACAATGCGTTAGCTTACTACAACACAACAAGGGAGGTAGG | 12802 |
| gb:MN975262 | Organism: Severe | CAAACCTGCTTGCACTGATGACAATGCGTTAGCTTACTACAACACAACAAGGGAGGTAGG | 12802 |
| gb:MT106052 | Organism: Severe | CAAACCTGCTTGCACTGATGACAATGCGTTAGCTTACTACAACACAACAAGGGAGGTAGG | 12802 |
| gb:LC522975 | Organism: Severe | CAAACCTGCTTGCACTGATGACAATGCGTTAGCTTACTACAACACAACAAGGGAGGTAGG | 12799 |
| gb:LC522973 | Organism: Severe | CAAACCTGCTTGCACTGATGACAATGCGTTAGCTTACTACAACACAACAAGGGAGGTAGG | 12799 |
| gb:LC522974 | Organism: Severe | CAAACCTGCTTGCACTGATGACAATGCGTTAGCTTACTACAACACAACAAGGGAGGTAGG | 12799 |
| gb:MN985325 | Organism: Severe | CAAACCTGCTTGCACTGATGACAATGCGTTAGCTTACTACAACACAACAAGGGAGGTAGG | 12802 |
| gb:MT020881 | Organism: Severe | CAAACCTGCTTGCACTGATGACAATGCGTTAGCTTACTACAACACAACAAGGGAGGTAGG | 12802 |



|             |                 |                                                              |       |
|-------------|-----------------|--------------------------------------------------------------|-------|
| gb:MT020880 | Organism:Severe | CAAACCTGCTTGCACTGATGACAATGCGTTAGCTTACTACAACACAACAAGGGAGGTAGG | 12802 |
| gb:MT066175 | Organism:Severe | CAAACCTGCTTGCACTGATGACAATGCGTTAGCTTACTACAACACAACAAGGGAGGTAGG | 12802 |
| gb:MN997409 | Organism:Severe | CAAACCTGCTTGCACTGATGACAATGCGTTAGCTTACTACAACACAACAAGGGAGGTAGG | 12802 |
| gb:MN938384 | Organism:Severe | CAAACCTGCTTGCACTGATGACAATGCGTTAGCTTACTACAACACAACAAGGGAGGTAGG | 12770 |
| gb:MT044258 | Organism:Severe | CAAACCTGCTTGCACTGATGACAATGCGTTAGCTTACTACAACACAACAAGGGAGGTAGG | 12778 |
| gb:MT039890 | Organism:Severe | CAAACCTGCTTGCACTGATGACAATGCGTTAGCTTACTACAACACAACAAGGGAGGTAGG | 12802 |
| gb:MN988713 | Organism:Severe | CAAACCTGCTTGCACTGATGACAATGCGTTAGCTTACTACAACACAACAAGGGAGGTAGG | 12802 |
| gb:LC521925 | Organism:Severe | CAAACCTGCTTGCACTGATGACAATGCGTTAGCTTACTACAACACAACAAGGGAGGTAGG | 12775 |
| gb:MT093571 | Organism:Severe | CAAACCTGCTTGCACTGATGACAATGCGTTAGCTTACTACAACACAACAAGGGAGGTAGG | 12802 |
| gb:MT039887 | Organism:Severe | CAAACCTGCTTGCACTGATGACAATGCGTTAGCTTACTACAACACAACAAGGGAGGTAGG | 12802 |
| gb:MT019530 | Organism:Severe | CAAACCTGCTTGCACTGATGACAATGCGTTAGCTTACTACAACACAACAAGGGAGGTAGG | 12802 |
| gb:MT039888 | Organism:Severe | CAAACCTGCTTGCACTGATGACAATGCGTTAGCTTACTACAACACAACAAGGGAGGTAGG | 12802 |
| gb:LC522972 | Organism:Severe | CAAACCTGCTTGCACTGATGACAATGCGTTAGCTTACTACAACACAACAAGGGAGGTAGG | 12799 |
| gb:MT027063 | Organism:Severe | CAAACCTGCTTGCACTGATGACAATGCGTTAGCTTACTACAACACAACAAGGGAGGTAGG | 12802 |
| gb:MT027062 | Organism:Severe | CAAACCTGCTTGCACTGATGACAATGCGTTAGCTTACTACAACACAACAAGGGAGGTAGG | 12802 |
| gb:MT019529 | Organism:Severe | CAAACCTGCTTGCACTGATGACAATGCGTTAGCTTACTACAACACAACAAGGGAGGTAGG | 12802 |
| gb:MN996529 | Organism:Severe | CAAACCTGCTTGCACTGATGACAATGCGTTAGCTTACTACAACACAACAAGGGAGGTAGG | 12790 |
| gb:MN996531 | Organism:Severe | CAAACCTGCTTGCACTGATGACAATGCGTTAGCTTACTACAACACAACAAGGGAGGTAGG | 12789 |
| gb:MT066176 | Organism:Severe | CAAACCTGCTTGCACTGATGACAATGCGTTAGCTTACTACAACACAACAAGGGAGGTAGG | 12802 |
| gb:MT027064 | Organism:Severe | CAAACCTGCTTGCACTGATGACAATGCGTTAGCTTACTACAACACAACAAGGGAGGTAGG | 12802 |
| gb:MN994468 | Organism:Severe | CAAACCTGCTTGCACTGATGACAATGCGTTAGCTTACTACAACACAACAAGGGAGGTAGG | 12802 |
| gb:MT072688 | Organism:Severe | CAAACCTGCTTGCACTGATGACAATGCGTTAGCTTACTACAACACAACAAGGGAGGTAGG | 12787 |
| gb:MN996527 | Organism:Severe | CAAACCTGCTTGCACTGATGACAATGCGTTAGCTTACTACAACACAACAAGGGAGGTAGG | 12769 |
| gb:MT093631 | Organism:Severe | CAAACCTGCTTGCACTGATGACAATGCGTTAGCTTACTACAACACAACAAGGGAGGTAGG | 12840 |
| gb:MT106053 | Organism:Severe | CAAACCTGCTTGCACTGATGACAATGCGTTAGCTTACTACAACACAACAAGGGAGGTAGG | 12802 |
| gb:MT019533 | Organism:Severe | CAAACCTGCTTGCACTGATGACAATGCGTTAGCTTACTACAACACAACAAGGGAGGTAGG | 12802 |
| gb:MT019531 | Organism:Severe | CAAACCTGCTTGCACTGATGACAATGCGTTAGCTTACTACAACACAACAAGGGAGGTAGG | 12802 |
| gb:MN996528 | Organism:Severe | CAAACCTGCTTGCACTGATGACAATGCGTTAGCTTACTACAACACAACAAGGGAGGTAGG | 12802 |
| gb:MN996530 | Organism:Severe | CAAACCTGCTTGCACTGATGACAATGCGTTAGCTTACTACAACACAACAAGGGAGGTAGG | 12788 |
| gb:MN908947 | Organism:Severe | CAAACCTGCTTGCACTGATGACAATGCGTTAGCTTACTACAACACAACAAGGGAGGTAGG | 12802 |
| gb:MT019532 | Organism:Severe | CAAACCTGCTTGCACTGATGACAATGCGTTAGCTTACTACAACACAACAAGGGAGGTAGG | 12802 |

\*\*\*\*\*

|             |                 |                                                             |       |
|-------------|-----------------|-------------------------------------------------------------|-------|
| gb:MT020781 | Organism:Severe | TTTGTACTTGCACTGTTATCCGATTTACAGGATTTGAAATGGGCTAGATTCCTAAGAGT | 12850 |
| gb:MT007544 | Organism:Severe | TTTGTACTTGCACTGTTATCCGATTTACAGGATTTGAAATGGGCTAGATTCCTAAGAGT | 12862 |
| gb:MN994467 | Organism:Severe | TTTGTACTTGCACTGTTATCCGATTTACAGGATTTGAAATGGGCTAGATTCCTAAGAGT | 12862 |
| gb:MT044257 | Organism:Severe | TTTGTACTTGCACTGTTATCCGATTTACAGGATTTGAAATGGGCTAGATTCCTAAGAGT | 12862 |
| gb:MT106054 | Organism:Severe | TTTGTACTTGCACTGTTATCCGATTTACAGGATTTGAAATGGGCTAGATTCCTAAGAGT | 12862 |
| gb:MT049951 | Organism:Severe | TTTGTACTTGCACTGTTATCCGATTTACAGGATTTGAAATGGGCTAGATTCCTAAGAGT | 12862 |
| gb:MN975262 | Organism:Severe | TTTGTACTTGCACTGTTATCCGATTTACAGGATTTGAAATGGGCTAGATTCCTAAGAGT | 12862 |
| gb:MT106052 | Organism:Severe | TTTGTACTTGCACTGTTATCCGATTTACAGGATTTGAAATGGGCTAGATTCCTAAGAGT | 12862 |
| gb:LC522975 | Organism:Severe | TTTGTACTTGCACTGTTATCCGATTTACAGGATTTGAAATGGGCTAGATTCCTAAGAGT | 12859 |
| gb:LC522973 | Organism:Severe | TTTGTACTTGCACTGTTATCCGATTTACAGGATTTGAAATGGGCTAGATTCCTAAGAGT | 12859 |
| gb:LC522974 | Organism:Severe | TTTGTACTTGCACTGTTATCCGATTTACAGGATTTGAAATGGGCTAGATTCCTAAGAGT | 12859 |
| gb:MN985325 | Organism:Severe | TTTGTACTTGCACTGTTATCCGATTTACAGGATTTGAAATGGGCTAGATTCCTAAGAGT | 12862 |
| gb:MT020881 | Organism:Severe | TTTGTACTTGCACTGTTATCCGATTTACAGGATTTGAAATGGGCTAGATTCCTAAGAGT | 12862 |
| gb:MT020880 | Organism:Severe | TTTGTACTTGCACTGTTATCCGATTTACAGGATTTGAAATGGGCTAGATTCCTAAGAGT | 12862 |
| gb:MT066175 | Organism:Severe | TTTGTACTTGCACTGTTATCCGATTTACAGGATTTGAAATGGGCTAGATTCCTAAGAGT | 12862 |
| gb:MN997409 | Organism:Severe | TTTGTACTTGCACTGTTATCCGATTTACAGGATTTGAAATGGGCTAGATTCCTAAGAGT | 12862 |
| gb:MN938384 | Organism:Severe | TTTGTACTTGCACTGTTATCCGATTTACAGGATTTGAAATGGGCTAGATTCCTAAGAGT | 12830 |
| gb:MT044258 | Organism:Severe | TTTGTACTTGCACTGTTATCCGATTTACAGGATTTGAAATGGGCTAGATTCCTAAGAGT | 12838 |
| gb:MT039890 | Organism:Severe | TTTGTACTTGCACTGTTATCCGATTTACAGGATTTGAAATGGGCTAGATTCCTAAGAGT | 12862 |
| gb:MN988713 | Organism:Severe | TTTGTACTTGCACTGTTATCCGATTTACAGGATTTGAAATGGGCTAGATTCCTAAGAGT | 12862 |
| gb:LC521925 | Organism:Severe | TTTGTACTTGCACTGTTATCCGATTTACAGGATTTGAAATGGGCTAGATTCCTAAGAGT | 12835 |
| gb:MT093571 | Organism:Severe | TTTGTACTTGCACTGTTATCCGATTTACAGGATTTGAAATGGGCTAGATTCCTAAGAGT | 12862 |
| gb:MT039887 | Organism:Severe | TTTGTACTTGCACTGTTATCCGATTTACAGGATTTGAAATGGGCTAGATTCCTAAGAGT | 12862 |
| gb:MT019530 | Organism:Severe | TTTGTACTTGCACTGTTATCCGATTTACAGGATTTGAAATGGGCTAGATTCCTAAGAGT | 12862 |
| gb:MT039888 | Organism:Severe | TTTGTACTTGCACTGTTATCCGATTTACAGGATTTGAAATGGGCTAGATTCCTAAGAGT | 12862 |
| gb:LC522972 | Organism:Severe | TTTGTACTTGCACTGTTATCCGATTTACAGGATTTGAAATGGGCTAGATTCCTAAGAGT | 12859 |
| gb:MT027063 | Organism:Severe | TTTGTACTTGCACTGTTATCCGATTTACAGGATTTGAAATGGGCTAGATTCCTAAGAGT | 12862 |
| gb:MT027062 | Organism:Severe | TTTGTACTTGCACTGTTATCCGATTTACAGGATTTGAAATGGGCTAGATTCCTAAGAGT | 12862 |
| gb:MT019529 | Organism:Severe | TTTGTACTTGCACTGTTATCCGATTTACAGGATTTGAAATGGGCTAGATTCCTAAGAGT | 12862 |
| gb:MN996529 | Organism:Severe | TTTGTACTTGCACTGTTATCCGATTTACAGGATTTGAAATGGGCTAGATTCCTAAGAGT | 12850 |
| gb:MN996531 | Organism:Severe | TTTGTACTTGCACTGTTATCCGATTTACAGGATTTGAAATGGGCTAGATTCCTAAGAGT | 12849 |
| gb:MT066176 | Organism:Severe | TTTGTACTTGCACTGTTATCCGATTTACAGGATTTGAAATGGGCTAGATTCCTAAGAGT | 12862 |

|             |                 |                                                            |       |
|-------------|-----------------|------------------------------------------------------------|-------|
| gb:MT027064 | Organism:Severe | TTTGTACTTGCAGTGTATCCGATTTACAGGATTTGAAATGGGCTAGATTCCTAAGAGT | 12862 |
| gb:MN994468 | Organism:Severe | TTTGTACTTGCAGTGTATCCGATTTACAGGATTTGAAATGGGCTAGATTCCTAAGAGT | 12862 |
| gb:MT072688 | Organism:Severe | TTTGTACTTGCAGTGTATCCGATTTACAGGATTTGAAATGGGCTAGATTCCTAAGAGT | 12847 |
| gb:MN996527 | Organism:Severe | TTTGTACTTGCAGTGTATCCGATTTACAGGATTTGAAATGGGCTAGATTCCTAAGAGT | 12829 |
| gb:MT093631 | Organism:Severe | TTTGTACTTGCAGTGTATCCGATTTACAGGATTTGAAATGGGCTAGATTCCTAAGAGT | 12900 |
| gb:MT106053 | Organism:Severe | TTTGTACTTGCAGTGTATCCGATTTACAGGATTTGAAATGGGCTAGATTCCTAAGAGT | 12862 |
| gb:MT019533 | Organism:Severe | TTTGTACTTGCAGTGTATCCGATTTACAGGATTTGAAATGGGCTAGATTCCTAAGAGT | 12862 |
| gb:MT019531 | Organism:Severe | TTTGTACTTGCAGTGTATCCGATTTACAGGATTTGAAATGGGCTAGATTCCTAAGAGT | 12862 |
| gb:MN996528 | Organism:Severe | TTTGTACTTGCAGTGTATCCGATTTACAGGATTTGAAATGGGCTAGATTCCTAAGAGT | 12862 |
| gb:MN996530 | Organism:Severe | TTTGTACTTGCAGTGTATCCGATTTACAGGATTTGAAATGGGCTAGATTCCTAAGAGT | 12848 |
| gb:MN908947 | Organism:Severe | TTTGTACTTGCAGTGTATCCGATTTACAGGATTTGAAATGGGCTAGATTCCTAAGAGT | 12862 |
| gb:MT019532 | Organism:Severe | TTTGTACTTGCAGTGTATCCGATTTACAGGATTTGAAATGGGCTAGATTCCTAAGAGT | 12862 |

\*\*\*\*\*

|             |                 |                                                           |       |
|-------------|-----------------|-----------------------------------------------------------|-------|
| gb:MT020781 | Organism:Severe | GATGGAAGTGGTACTATCTATACAGAAGTGAACACCTTGTAGGTTTGTACAGACACA | 12910 |
| gb:MT007544 | Organism:Severe | GATGGAAGTGGTACTATCTATACAGAAGTGAACACCTTGTAGGTTTGTACAGACACA | 12922 |
| gb:MN994467 | Organism:Severe | GATGGAAGTGGTACTATCTATACAGAAGTGAACACCTTGTAGGTTTGTACAGACACA | 12922 |
| gb:MT044257 | Organism:Severe | GATGGAAGTGGTACTATCTATACAGAAGTGAACACCTTGTAGGTTTGTACAGACACA | 12922 |
| gb:MT106054 | Organism:Severe | GATGGAAGTGGTACTATCTATACAGAAGTGAACACCTTGTAGGTTTGTACAGACACA | 12922 |
| gb:MT049951 | Organism:Severe | GATGGAAGTGGTACTATCTATACAGAAGTGAACACCTTGTAGGTTTGTACAGACACA | 12922 |
| gb:MN975262 | Organism:Severe | GATGGAAGTGGTACTATCTATACAGAAGTGAACACCTTGTAGGTTTGTACAGACACA | 12922 |
| gb:MT106052 | Organism:Severe | GATGGAAGTGGTACTATCTATACAGAAGTGAACACCTTGTAGGTTTGTACAGACACA | 12922 |
| gb:LC522975 | Organism:Severe | GATGGAAGTGGTACTATCTATACAGAAGTGAACACCTTGTAGGTTTGTACAGACACA | 12919 |
| gb:LC522973 | Organism:Severe | GATGGAAGTGGTACTATCTATACAGAAGTGAACACCTTGTAGGTTTGTACAGACACA | 12919 |
| gb:LC522974 | Organism:Severe | GATGGAAGTGGTACTATCTATACAGAAGTGAACACCTTGTAGGTTTGTACAGACACA | 12919 |
| gb:MN985325 | Organism:Severe | GATGGAAGTGGTACTATCTATACAGAAGTGAACACCTTGTAGGTTTGTACAGACACA | 12922 |
| gb:MT020881 | Organism:Severe | GATGGAAGTGGTACTATCTATACAGAAGTGAACACCTTGTAGGTTTGTACAGACACA | 12922 |
| gb:MT020880 | Organism:Severe | GATGGAAGTGGTACTATCTATACAGAAGTGAACACCTTGTAGGTTTGTACAGACACA | 12922 |
| gb:MT066175 | Organism:Severe | GATGGAAGTGGTACTATCTATACAGAAGTGAACACCTTGTAGGTTTGTACAGACACA | 12922 |
| gb:MN997409 | Organism:Severe | GATGGAAGTGGTACTATCTATACAGAAGTGAACACCTTGTAGGTTTGTACAGACACA | 12922 |
| gb:MN938384 | Organism:Severe | GATGGAAGTGGTACTATCTATACAGAAGTGAACACCTTGTAGGTTTGTACAGACACA | 12890 |
| gb:MT044258 | Organism:Severe | GATGGAAGTGGTACTATCTATACAGAAGTGAACACCTTGTAGGTTTGTACAGACACA | 12898 |
| gb:MT039890 | Organism:Severe | GATGGAAGTGGTACTATCTATACAGAAGTGAACACCTTGTAGGTTTGTACAGACACA | 12922 |
| gb:MN988713 | Organism:Severe | GATGGAAGTGGTACTATCTATACAGAAGTGAACACCTTGTAGGTTTGTACAGACACA | 12922 |
| gb:LC521925 | Organism:Severe | GATGGAAGTGGTACTATCTATACAGAAGTGAACACCTTGTAGGTTTGTACAGACACA | 12895 |
| gb:MT093571 | Organism:Severe | GATGGAAGTGGTACTATCTATACAGAAGTGAACACCTTGTAGGTTTGTACAGACACA | 12922 |
| gb:MT039887 | Organism:Severe | GATGGAAGTGGTACTATCTATACAGAAGTGAACACCTTGTAGGTTTGTACAGACACA | 12922 |
| gb:MT019530 | Organism:Severe | GATGGAAGTGGTACTATCTATACAGAAGTGAACACCTTGTAGGTTTGTACAGACACA | 12922 |
| gb:MT039888 | Organism:Severe | GATGGAAGTGGTACTATCTATACAGAAGTGAACACCTTGTAGGTTTGTACAGACACA | 12922 |
| gb:LC522972 | Organism:Severe | GATGGAAGTGGTACTATCTATACAGAAGTGAACACCTTGTAGGTTTGTACAGACACA | 12919 |
| gb:MT027063 | Organism:Severe | GATGGAAGTGGTACTATCTATACAGAAGTGAACACCTTGTAGGTTTGTACAGACACA | 12922 |
| gb:MT027062 | Organism:Severe | GATGGAAGTGGTACTATCTATACAGAAGTGAACACCTTGTAGGTTTGTACAGACACA | 12922 |
| gb:MT019529 | Organism:Severe | GATGGAAGTGGTACTATCTATACAGAAGTGAACACCTTGTAGGTTTGTACAGACACA | 12922 |
| gb:MN996529 | Organism:Severe | GATGGAAGTGGTACTATCTATACAGAAGTGAACACCTTGTAGGTTTGTACAGACACA | 12910 |
| gb:MN996531 | Organism:Severe | GATGGAAGTGGTACTATCTATACAGAAGTGAACACCTTGTAGGTTTGTACAGACACA | 12909 |
| gb:MT066176 | Organism:Severe | GATGGAAGTGGTACTATCTATACAGAAGTGAACACCTTGTAGGTTTGTACAGACACA | 12922 |
| gb:MT027064 | Organism:Severe | GATGGAAGTGGTACTATCTATACAGAAGTGAACACCTTGTAGGTTTGTACAGACACA | 12922 |
| gb:MN994468 | Organism:Severe | GATGGAAGTGGTACTATCTATACAGAAGTGAACACCTTGTAGGTTTGTACAGACACA | 12922 |
| gb:MT072688 | Organism:Severe | GATGGAAGTGGTACTATCTATACAGAAGTGAACACCTTGTAGGTTTGTACAGACACA | 12907 |
| gb:MN996527 | Organism:Severe | GATGGAAGTGGTACTATCTATACAGAAGTGAACACCTTGTAGGTTTGTACAGACACA | 12889 |
| gb:MT093631 | Organism:Severe | GATGGAAGTGGTACTATCTATACAGAAGTGAACACCTTGTAGGTTTGTACAGACACA | 12960 |
| gb:MT106053 | Organism:Severe | GATGGAAGTGGTACTATCTATACAGAAGTGAACACCTTGTAGGTTTGTACAGACACA | 12922 |
| gb:MT019533 | Organism:Severe | GATGGAAGTGGTACTATCTATACAGAAGTGAACACCTTGTAGGTTTGTACAGACACA | 12922 |
| gb:MT019531 | Organism:Severe | GATGGAAGTGGTACTATCTATACAGAAGTGAACACCTTGTAGGTTTGTACAGACACA | 12922 |
| gb:MN996528 | Organism:Severe | GATGGAAGTGGTACTATCTATACAGAAGTGAACACCTTGTAGGTTTGTACAGACACA | 12922 |
| gb:MN996530 | Organism:Severe | GATGGAAGTGGTACTATCTATACAGAAGTGAACACCTTGTAGGTTTGTACAGACACA | 12908 |
| gb:MN908947 | Organism:Severe | GATGGAAGTGGTACTATCTATACAGAAGTGAACACCTTGTAGGTTTGTACAGACACA | 12922 |
| gb:MT019532 | Organism:Severe | GATGGAAGTGGTACTATCTATACAGAAGTGAACACCTTGTAGGTTTGTACAGACACA | 12922 |

\*\*\*\*\*

|             |                 |                                                          |       |
|-------------|-----------------|----------------------------------------------------------|-------|
| gb:MT020781 | Organism:Severe | CCTAAAGTCTAAAGTGAAGTATTTATACTTTATTAAGGATTAACAACCTAAATAGA | 12970 |
| gb:MT007544 | Organism:Severe | CCTAAAGTCTAAAGTGAAGTATTTATACTTTATTAAGGATTAACAACCTAAATAGA | 12982 |
| gb:MN994467 | Organism:Severe | CCTAAAGTCTAAAGTGAAGTATTTATACTTTATTAAGGATTAACAACCTAAATAGA | 12982 |
| gb:MT044257 | Organism:Severe | CCTAAAGTCTAAAGTGAAGTATTTATACTTTATTAAGGATTAACAACCTAAATAGA | 12982 |
| gb:MT106054 | Organism:Severe | CCTAAAGTCTAAAGTGAAGTATTTATACTTTATTAAGGATTAACAACCTAAATAGA | 12982 |

|             |                 |                                                          |       |
|-------------|-----------------|----------------------------------------------------------|-------|
| gb:MT049951 | Organism:Severe | CCTAAAGTCTAAAGTGAAGTATTTATACTTTATTAAGGATTAACAACCTAAATAGA | 12982 |
| gb:MN975262 | Organism:Severe | CCTAAAGTCTAAAGTGAAGTATTTATACTTTATTAAGGATTAACAACCTAAATAGA | 12982 |
| gb:MT106052 | Organism:Severe | CCTAAAGTCTAAAGTGAAGTATTTATACTTTATTAAGGATTAACAACCTAAATAGA | 12982 |
| gb:LC522975 | Organism:Severe | CCTAAAGTCTAAAGTGAAGTATTTATACTTTATTAAGGATTAACAACCTAAATAGA | 12979 |
| gb:LC522973 | Organism:Severe | CCTAAAGTCTAAAGTGAAGTATTTATACTTTATTAAGGATTAACAACCTAAATAGA | 12979 |
| gb:LC522974 | Organism:Severe | CCTAAAGTCTAAAGTGAAGTATTTATACTTTATTAAGGATTAACAACCTAAATAGA | 12979 |
| gb:MN985325 | Organism:Severe | CCTAAAGTCTAAAGTGAAGTATTTATACTTTATTAAGGATTAACAACCTAAATAGA | 12982 |
| gb:MT020881 | Organism:Severe | CCTAAAGTCTAAAGTGAAGTATTTATACTTTATTAAGGATTAACAACCTAAATAGA | 12982 |
| gb:MT020880 | Organism:Severe | CCTAAAGTCTAAAGTGAAGTATTTATACTTTATTAAGGATTAACAACCTAAATAGA | 12982 |
| gb:MT066175 | Organism:Severe | CCTAAAGTCTAAAGTGAAGTATTTATACTTTATTAAGGATTAACAACCTAAATAGA | 12982 |
| gb:MN997409 | Organism:Severe | CCTAAAGTCTAAAGTGAAGTATTTATACTTTATTAAGGATTAACAACCTAAATAGA | 12982 |
| gb:MN938384 | Organism:Severe | CCTAAAGTCTAAAGTGAAGTATTTATACTTTATTAAGGATTAACAACCTAAATAGA | 12950 |
| gb:MT044258 | Organism:Severe | CCTAAAGTCTAAAGTGAAGTATTTATACTTTATTAAGGATTAACAACCTAAATAGA | 12958 |
| gb:MT039890 | Organism:Severe | CCTAAAGTCTAAAGTGAAGTATTTATACTTTATTAAGGATTAACAACCTAAATAGA | 12982 |
| gb:MN988713 | Organism:Severe | CCTAAAGTCTAAAGTGAAGTATTTATACTTTATTAAGGATTAACAACCTAAATAGA | 12982 |
| gb:LC521925 | Organism:Severe | CCTAAAGTCTAAAGTGAAGTATTTATACTTTATTAAGGATTAACAACCTAAATAGA | 12955 |
| gb:MT093571 | Organism:Severe | CCTAAAGTCTAAAGTGAAGTATTTATACTTTATTAAGGATTAACAACCTAAATAGA | 12982 |
| gb:MT039887 | Organism:Severe | CCTAAAGTCTAAAGTGAAGTATTTATACTTTATTAAGGATTAACAACCTAAATAGA | 12982 |
| gb:MT019530 | Organism:Severe | CCTAAAGTCTAAAGTGAAGTATTTATACTTTATTAAGGATTAACAACCTAAATAGA | 12982 |
| gb:MT039888 | Organism:Severe | CCTAAAGTCTAAAGTGAAGTATTTATACTTTATTAAGGATTAACAACCTAAATAGA | 12982 |
| gb:LC522972 | Organism:Severe | CCTAAAGTCTAAAGTGAAGTATTTATACTTTATTAAGGATTAACAACCTAAATAGA | 12979 |
| gb:MT027063 | Organism:Severe | CCTAAAGTCTAAAGTGAAGTATTTATACTTTATTAAGGATTAACAACCTAAATAGA | 12982 |
| gb:MT027062 | Organism:Severe | CCTAAAGTCTAAAGTGAAGTATTTATACTTTATTAAGGATTAACAACCTAAATAGA | 12982 |
| gb:MT019529 | Organism:Severe | CCTAAAGTCTAAAGTGAAGTATTTATACTTTATTAAGGATTAACAACCTAAATAGA | 12982 |
| gb:MN996529 | Organism:Severe | CCTAAAGTCTAAAGTGAAGTATTTATACTTTATTAAGGATTAACAACCTAAATAGA | 12970 |
| gb:MN996531 | Organism:Severe | CCTAAAGTCTAAAGTGAAGTATTTATACTTTATTAAGGATTAACAACCTAAATAGA | 12969 |
| gb:MT066176 | Organism:Severe | CCTAAAGTCTAAAGTGAAGTATTTATACTTTATTAAGGATTAACAACCTAAATAGA | 12982 |
| gb:MT027064 | Organism:Severe | CCTAAAGTCTAAAGTGAAGTATTTATACTTTATTAAGGATTAACAACCTAAATAGA | 12982 |
| gb:MN994468 | Organism:Severe | CCTAAAGTCTAAAGTGAAGTATTTATACTTTATTAAGGATTAACAACCTAAATAGA | 12982 |
| gb:MT072688 | Organism:Severe | CCTAAAGTCTAAAGTGAAGTATTTATACTTTATTAAGGATTAACAACCTAAATAGA | 12967 |
| gb:MN996527 | Organism:Severe | CCTAAAGTCTAAAGTGAAGTATTTATACTTTATTAAGGATTAACAACCTAAATAGA | 12949 |
| gb:MT093631 | Organism:Severe | CCTAAAGTCTAAAGTGAAGTATTTATACTTTATTAAGGATTAACAACCTAAATAGA | 13020 |
| gb:MT106053 | Organism:Severe | CCTAAAGTCTAAAGTGAAGTATTTATACTTTATTAAGGATTAACAACCTAAATAGA | 12982 |
| gb:MT019533 | Organism:Severe | CCTAAAGTCTAAAGTGAAGTATTTATACTTTATTAAGGATTAACAACCTAAATAGA | 12982 |
| gb:MT019531 | Organism:Severe | CCTAAAGTCTAAAGTGAAGTATTTATACTTTATTAAGGATTAACAACCTAAATAGA | 12982 |
| gb:MN996528 | Organism:Severe | CCTAAAGTCTAAAGTGAAGTATTTATACTTTATTAAGGATTAACAACCTAAATAGA | 12982 |
| gb:MN996530 | Organism:Severe | CCTAAAGTCTAAAGTGAAGTATTTATACTTTATTAAGGATTAACAACCTAAATAGA | 12968 |
| gb:MN908947 | Organism:Severe | CCTAAAGTCTAAAGTGAAGTATTTATACTTTATTAAGGATTAACAACCTAAATAGA | 12982 |
| gb:MT019532 | Organism:Severe | CCTAAAGTCTAAAGTGAAGTATTTATACTTTATTAAGGATTAACAACCTAAATAGA | 12982 |

\*\*\*\*\*

|             |                 |                                                              |       |
|-------------|-----------------|--------------------------------------------------------------|-------|
| gb:MT020781 | Organism:Severe | GGTATGGTACTTGGTAGTTTAGCTGCCACAGTACGTCTACAAGCTGGTAATGCAACAGAA | 13030 |
| gb:MT007544 | Organism:Severe | GGTATGGTACTTGGTAGTTTAGCTGCCACAGTACGTCTACAAGCTGGTAATGCAACAGAA | 13042 |
| gb:MN994467 | Organism:Severe | GGTATGGTACTTGGTAGTTTAGCTGCCACAGTACGTCTACAAGCTGGTAATGCAACAGAA | 13042 |
| gb:MT044257 | Organism:Severe | GGTATGGTACTTGGTAGTTTAGCTGCCACAGTACGTCTACAAGCTGGTAATGCAACAGAA | 13042 |
| gb:MT106054 | Organism:Severe | GGTATGGTACTTGGTAGTTTAGCTGCCACAGTACGTCTACAAGCTGGTAATGCAACAGAA | 13042 |
| gb:MT049951 | Organism:Severe | GGTATGGTACTTGGTAGTTTAGCTGCCACAGTACGTCTACAAGCTGGTAATGCAACAGAA | 13042 |
| gb:MN975262 | Organism:Severe | GGTATGGTACTTGGTAGTTTAGCTGCCACAGTACGTCTACAAGCTGGTAATGCAACAGAA | 13042 |
| gb:MT106052 | Organism:Severe | GGTATGGTACTTGGTAGTTTAGCTGCCACAGTACGTCTACAAGCTGGTAATGCAACAGAA | 13042 |
| gb:LC522975 | Organism:Severe | GGTATGGTACTTGGTAGTTTAGCTGCCACAGTACGTCTACAAGCTGGTAATGCAACAGAA | 13039 |
| gb:LC522973 | Organism:Severe | GGTATGGTACTTGGTAGTTTAGCTGCCACAGTACGTCTACAAGCTGGTAATGCAACAGAA | 13039 |
| gb:LC522974 | Organism:Severe | GGTATGGTACTTGGTAGTTTAGCTGCCACAGTACGTCTACAAGCTGGTAATGCAACAGAA | 13039 |
| gb:MN985325 | Organism:Severe | GGTATGGTACTTGGTAGTTTAGCTGCCACAGTACGTCTACAAGCTGGTAATGCAACAGAA | 13042 |
| gb:MT020881 | Organism:Severe | GGTATGGTACTTGGTAGTTTAGCTGCCACAGTACGTCTACAAGCTGGTAATGCAACAGAA | 13042 |
| gb:MT020880 | Organism:Severe | GGTATGGTACTTGGTAGTTTAGCTGCCACAGTACGTCTACAAGCTGGTAATGCAACAGAA | 13042 |
| gb:MT066175 | Organism:Severe | GGTATGGTACTTGGTAGTTTAGCTGCCACAGTACGTCTACAAGCTGGTAATGCAACAGAA | 13042 |
| gb:MN997409 | Organism:Severe | GGTATGGTACTTGGTAGTTTAGCTGCCACAGTACGTCTACAAGCTGGTAATGCAACAGAA | 13042 |
| gb:MN938384 | Organism:Severe | GGTATGGTACTTGGTAGTTTAGCTGCCACAGTACGTCTACAAGCTGGTAATGCAACAGAA | 13010 |
| gb:MT044258 | Organism:Severe | GGTATGGTACTTGGTAGTTTAGCTGCCACAGTACGTCTACAAGCTGGTAATGCAACAGAA | 13018 |
| gb:MT039890 | Organism:Severe | GGTATGGTACTTGGTAGTTTAGCTGCCACAGTACGTCTACAAGCTGGTAATGCAACAGAA | 13042 |
| gb:MN988713 | Organism:Severe | GGTATGGTACTTGGTAGTTTAGCTGCCACAGTACGTCTACAAGCTGGTAATGCAACAGAA | 13042 |
| gb:LC521925 | Organism:Severe | GGTATGGTACTTGGTAGTTTAGCTGCCACAGTACGTCTACAAGCTGGTAATGCAACAGAA | 13015 |
| gb:MT093571 | Organism:Severe | GGTATGGTACTTGGTAGTTTAGCTGCCACAGTACGTCTACAAGCTGGTAATGCAACAGAA | 13042 |
| gb:MT039887 | Organism:Severe | GGTATGGTACTTGGTAGTTTAGCTGCCACAGTACGTCTACAAGCTGGTAATGCAACAGAA | 13042 |
| gb:MT019530 | Organism:Severe | GGTATGGTACTTGGTAGTTTAGCTGCCACAGTACGTCTACAAGCTGGTAATGCAACAGAA | 13042 |



|             |                  |                                                                      |       |
|-------------|------------------|----------------------------------------------------------------------|-------|
| gb:MT019532 | Organism: Severe | GTGCCTGCCAATTCAACTGTATTATCTTTCTGTGCTTTTGTCTAGATGCTGCTAAAGCT<br>***** | 13102 |
| gb:MT020781 | Organism: Severe | TACAAAGATTATCTAGCTAGTGGGGGACAACCAATCACTAATTGTGTTAAGATGTTGTG          | 13150 |
| gb:MT007544 | Organism: Severe | TACAAAGATTATCTAGCTAGTGGGGGACAACCAATCACTAATTGTGTTAAGATGTTGTG          | 13162 |
| gb:MN994467 | Organism: Severe | TACAAAGATTATCTAGCTAGTGGGGGACAACCAATCACTAATTGTGTTAAGATGTTGTG          | 13162 |
| gb:MT044257 | Organism: Severe | TACAAAGATTATCTAGCTAGTGGGGGACAACCAATCACTAATTGTGTTAAGATGTTGTG          | 13162 |
| gb:MT106054 | Organism: Severe | TACAAAGATTATCTAGCTAGTGGGGGACAACCAATCACTAATTGTGTTAAGATGTTGTG          | 13162 |
| gb:MT049951 | Organism: Severe | TACAAAGATTATCTAGCTAGTGGGGGACAACCAATCACTAATTGTGTTAAGATGTTGTG          | 13162 |
| gb:MN975262 | Organism: Severe | TACAAAGATTATCTAGCTAGTGGGGGACAACCAATCACTAATTGTGTTAAGATGTTGTG          | 13162 |
| gb:MT106052 | Organism: Severe | TACAAAGATTATCTAGCTAGTGGGGGACAACCAATCACTAATTGTGTTAAGATGTTGTG          | 13162 |
| gb:LC522975 | Organism: Severe | TACAAAGATTATCTAGCTAGTGGGGGACAACCAATCACTAATTGTGTTAAGATGTTGTG          | 13159 |
| gb:LC522973 | Organism: Severe | TACAAAGATTATCTAGCTAGTGGGGGACAACCAATCACTAATTGTGTTAAGATGTTGTG          | 13159 |
| gb:LC522974 | Organism: Severe | TACAAAGATTATCTAGCTAGTGGGGGACAACCAATCACTAATTGTGTTAAGATGTTGTG          | 13159 |
| gb:MN985325 | Organism: Severe | TACAAAGATTATCTAGCTAGTGGGGGACAACCAATCACTAATTGTGTTAAGATGTTGTG          | 13162 |
| gb:MT020881 | Organism: Severe | TACAAAGATTATCTAGCTAGTGGGGGACAACCAATCACTAATTGTGTTAAGATGTTGTG          | 13162 |
| gb:MT020880 | Organism: Severe | TACAAAGATTATCTAGCTAGTGGGGGACAACCAATCACTAATTGTGTTAAGATGTTGTG          | 13162 |
| gb:MT066175 | Organism: Severe | TACAAAGATTATCTAGCTAGTGGGGGACAACCAATCACTAATTGTGTTAAGATGTTGTG          | 13162 |
| gb:MN997409 | Organism: Severe | TACAAAGATTATCTAGCTAGTGGGGGACAACCAATCACTAATTGTGTTAAGATGTTGTG          | 13162 |
| gb:MN938384 | Organism: Severe | TACAAAGATTATCTAGCTAGTGGGGGACAACCAATCACTAATTGTGTTAAGATGTTGTG          | 13130 |
| gb:MT044258 | Organism: Severe | TACAAAGATTATCTAGCTAGTGGGGGACAACCAATCACTAATTGTGTTAAGATGTTGTG          | 13138 |
| gb:MT039890 | Organism: Severe | TACAAAGATTATCTAGCTAGTGGGGGACAACCAATCACTAATTGTGTTAAGATGTTGTG          | 13162 |
| gb:MN988713 | Organism: Severe | TACAAAGATTATCTAGCTAGTGGGGGACAACCAATCACTAATTGTGTTAAGATGTTGTG          | 13162 |
| gb:LC521925 | Organism: Severe | TACAAAGATTATCTAGCTAGTGGGGGACAACCAATCACTAATTGTGTTAAGATGTTGTG          | 13135 |
| gb:MT093571 | Organism: Severe | TACAAAGATTATCTAGCTAGTGGGGGACAACCAATCACTAATTGTGTTAAGATGTTGTG          | 13162 |
| gb:MT039887 | Organism: Severe | TACAAAGATTATCTAGCTAGTGGGGGACAACCAATCACTAATTGTGTTAAGATGTTGTG          | 13162 |
| gb:MT019530 | Organism: Severe | TACAAAGATTATCTAGCTAGTGGGGGACAACCAATCACTAATTGTGTTAAGATGTTGTG          | 13162 |
| gb:MT039888 | Organism: Severe | TACAAAGATTATCTAGCTAGTGGGGGACAACCAATCACTAATTGTGTTAAGATGTTGTG          | 13162 |
| gb:LC522972 | Organism: Severe | TACAAAGATTATCTAGCTAGTGGGGGACAACCAATCACTAATTGTGTTAAGATGTTGTG          | 13159 |
| gb:MT027063 | Organism: Severe | TACAAAGATTATCTAGCTAGTGGGGGACAACCAATCACTAATTGTGTTAAGATGTTGTG          | 13162 |
| gb:MT027062 | Organism: Severe | TACAAAGATTATCTAGCTAGTGGGGGACAACCAATCACTAATTGTGTTAAGATGTTGTG          | 13162 |
| gb:MT019529 | Organism: Severe | TACAAAGATTATCTAGCTAGTGGGGGACAACCAATCACTAATTGTGTTAAGATGTTGTG          | 13162 |
| gb:MN996529 | Organism: Severe | TACAAAGATTATCTAGCTAGTGGGGGACAACCAATCACTAATTGTGTTAAGATGTTGTG          | 13150 |
| gb:MN996531 | Organism: Severe | TACAAAGATTATCTAGCTAGTGGGGGACAACCAATCACTAATTGTGTTAAGATGTTGTG          | 13149 |
| gb:MT066176 | Organism: Severe | TACAAAGATTATCTAGCTAGTGGGGGACAACCAATCACTAATTGTGTTAAGATGTTGTG          | 13162 |
| gb:MT027064 | Organism: Severe | TACAAAGATTATCTAGCTAGTGGGGGACAACCAATCACTAATTGTGTTAAGATGTTGTG          | 13162 |
| gb:MN994468 | Organism: Severe | TACAAAGATTATCTAGCTAGTGGGGGACAACCAATCACTAATTGTGTTAAGATGTTGTG          | 13162 |
| gb:MT072688 | Organism: Severe | TACAAAGATTATCTAGCTAGTGGGGGACAACCAATCACTAATTGTGTTAAGATGTTGTG          | 13147 |
| gb:MN996527 | Organism: Severe | TACAAAGATTATCTAGCTAGTGGGGGACAACCAATCACTAATTGTGTTAAGATGTTGTG          | 13129 |
| gb:MT093631 | Organism: Severe | TACAAAGATTATCTAGCTAGTGGGGGACAACCAATCACTAATTGTGTTAAGATGTTGTG          | 13200 |
| gb:MT106053 | Organism: Severe | TACAAAGATTATCTAGCTAGTGGGGGACAACCAATCACTAATTGTGTTAAGATGTTGTG          | 13162 |
| gb:MT019533 | Organism: Severe | TACAAAGATTATCTAGCTAGTGGGGGACAACCAATCACTAATTGTGTTAAGATGTTGTG          | 13162 |
| gb:MT019531 | Organism: Severe | TACAAAGATTATCTAGCTAGTGGGGGACAACCAATCACTAATTGTGTTAAGATGTTGTG          | 13162 |
| gb:MN996528 | Organism: Severe | TACAAAGATTATCTAGCTAGTGGGGGACAACCAATCACTAATTGTGTTAAGATGTTGTG          | 13162 |
| gb:MN996530 | Organism: Severe | TACAAAGATTATCTAGCTAGTGGGGGACAACCAATCACTAATTGTGTTAAGATGTTGTG          | 13148 |
| gb:MN908947 | Organism: Severe | TACAAAGATTATCTAGCTAGTGGGGGACAACCAATCACTAATTGTGTTAAGATGTTGTG          | 13162 |
| gb:MT019532 | Organism: Severe | TACAAAGATTATCTAGCTAGTGGGGGACAACCAATCACTAATTGTGTTAAGATGTTGTG<br>***** | 13162 |

|             |                  |                                                              |       |
|-------------|------------------|--------------------------------------------------------------|-------|
| gb:MT020781 | Organism: Severe | ACACACACTGGTACTGGTCAGGCAATAACAGTTACACCGGAAGCCAATATGGATCAAGAA | 13210 |
| gb:MT007544 | Organism: Severe | ACACACACTGGTACTGGTCAGGCAATAACAGTTACACCGGAAGCCAATATGGATCAAGAA | 13222 |
| gb:MN994467 | Organism: Severe | ACACACACTGGTACTGGTCAGGCAATAACAGTTACACCGGAAGCCAATATGGATCAAGAA | 13222 |
| gb:MT044257 | Organism: Severe | ACACACACTGGTACTGGTCAGGCAATAACAGTTACACCGGAAGCCAATATGGATCAAGAA | 13222 |
| gb:MT106054 | Organism: Severe | ACACACACTGGTACTGGTCAGGCAATAACAGTTACACCGGAAGCCAATATGGATCAAGAA | 13222 |
| gb:MT049951 | Organism: Severe | ACACACACTGGTACTGGTCAGGCAATAACAGTTACACCGGAAGCCAATATGGATCAAGAA | 13222 |
| gb:MN975262 | Organism: Severe | ACACACACTGGTACTGGTCAGGCAATAACAGTTACACCGGAAGCCAATATGGATCAAGAA | 13222 |
| gb:MT106052 | Organism: Severe | ACACACACTGGTACTGGTCAGGCAATAACAGTTACACCGGAAGCCAATATGGATCAAGAA | 13222 |
| gb:LC522975 | Organism: Severe | ACACACACTGGTACTGGTCAGGCAATAACAGTTACACCGGAAGCCAATATGGATCAAGAA | 13219 |
| gb:LC522973 | Organism: Severe | ACACACACTGGTACTGGTCAGGCAATAACAGTTACACCGGAAGCCAATATGGATCAAGAA | 13219 |
| gb:LC522974 | Organism: Severe | ACACACACTGGTACTGGTCAGGCAATAACAGTTACACCGGAAGCCAATATGGATCAAGAA | 13219 |
| gb:MN985325 | Organism: Severe | ACACACACTGGTACTGGTCAGGCAATAACAGTTACACCGGAAGCCAATATGGATCAAGAA | 13222 |
| gb:MT020881 | Organism: Severe | ACACACACTGGTACTGGTCAGGCAATAACAGTTACACCGGAAGCCAATATGGATCAAGAA | 13222 |
| gb:MT020880 | Organism: Severe | ACACACACTGGTACTGGTCAGGCAATAACAGTTACACCGGAAGCCAATATGGATCAAGAA | 13222 |
| gb:MT066175 | Organism: Severe | ACACACACTGGTACTGGTCAGGCAATAACAGTTACACCGGAAGCCAATATGGATCAAGAA | 13222 |
| gb:MN997409 | Organism: Severe | ACACACACTGGTACTGGTCAGGCAATAACAGTTACACCGGAAGCCAATATGGATCAAGAA | 13222 |

|             |                 |                                                              |       |
|-------------|-----------------|--------------------------------------------------------------|-------|
| gb:MN938384 | Organism:Severe | ACACACACTGGTACTGGTCAGGCAATAACAGTTACACCGGAAGCCAATATGGATCAAGAA | 13190 |
| gb:MT044258 | Organism:Severe | ACACACACTGGTACTGGTCAGGCAATAACAGTTACACCGGAAGCCAATATGGATCAAGAA | 13198 |
| gb:MT039890 | Organism:Severe | ACACACACTGGTACTGGTCAGGCAATAACAGTTACACCGGAAGCCAATATGGATCAAGAA | 13222 |
| gb:MN988713 | Organism:Severe | ACACACACTGGTACTGGTCAGGCAATAACAGTTACACCGGAAGCCAATATGGATCAAGAA | 13222 |
| gb:LC521925 | Organism:Severe | ACACACACTGGTACTGGTCAGGCAATAACAGTTACACCGGAAGCCAATATGGATCAAGAA | 13195 |
| gb:MT093571 | Organism:Severe | ACACACACTGGTACTGGTCAGGCAATAACAGTTACACCGGAAGCCAATATGGATCAAGAA | 13222 |
| gb:MT039887 | Organism:Severe | ACACACACTGGTACTGGTCAGGCAATAACAGTTACACCGGAAGCCAATATGGATCAAGAA | 13222 |
| gb:MT019530 | Organism:Severe | ACACACACTGGTACTGGTCAGGCAATAACAGTTACACCGGAAGCCAATATGGATCAAGAA | 13222 |
| gb:MT039888 | Organism:Severe | ACACACACTGGTACTGGTCAGGCAATAACAGTTACACCGGAAGCCAATATGGATCAAGAA | 13222 |
| gb:LC522972 | Organism:Severe | ACACACACTGGTACTGGTCAGGCAATAACAGTTACACCGGAAGCCAATATGGATCAAGAA | 13219 |
| gb:MT027063 | Organism:Severe | ACACACACTGGTACTGGTCAGGCAATAACAGTTACACCGGAAGCCAATATGGATCAAGAA | 13222 |
| gb:MT027062 | Organism:Severe | ACACACACTGGTACTGGTCAGGCAATAACAGTTACACCGGAAGCCAATATGGATCAAGAA | 13222 |
| gb:MT019529 | Organism:Severe | ACACACACTGGTACTGGTCAGGCAATAACAGTTACACCGGAAGCCAATATGGATCAAGAA | 13222 |
| gb:MN996529 | Organism:Severe | ACACACACTGGTACTGGTCAGGCAATAACAGTTACACCGGAAGCCAATATGGATCAAGAA | 13210 |
| gb:MN996531 | Organism:Severe | ACACACACTGGTACTGGTCAGGCAATAACAGTTACACCGGAAGCCAATATGGATCAAGAA | 13209 |
| gb:MT066176 | Organism:Severe | ACACACACTGGTACTGGTCAGGCAATAACAGTTACACCGGAAGCCAATATGGATCAAGAA | 13222 |
| gb:MT027064 | Organism:Severe | ACACACACTGGTACTGGTCAGGCAATAACAGTTACACCGGAAGCCAATATGGATCAAGAA | 13222 |
| gb:MN994468 | Organism:Severe | ACACACACTGGTACTGGTCAGGCAATAACAGTTACACCGGAAGCCAATATGGATCAAGAA | 13222 |
| gb:MT072688 | Organism:Severe | ACACACACTGGTACTGGTCAGGCAATAACAGTTACACCGGAAGCCAATATGGATCAAGAA | 13207 |
| gb:MN996527 | Organism:Severe | ACACACACTGGTACTGGTCAGGCAATAACAGTTACACCGGAAGCCAATATGGATCAAGAA | 13189 |
| gb:MT093631 | Organism:Severe | ACACACACTGGTACTGGTCAGGCAATAACAGTTACACCGGAAGCCAATATGGATCAAGAA | 13260 |
| gb:MT106053 | Organism:Severe | ACACACACTGGTACTGGTCAGGCAATAACAGTTACACCGGAAGCCAATATGGATCAAGAA | 13222 |
| gb:MT019533 | Organism:Severe | ACACACACTGGTACTGGTCAGGCAATAACAGTTACACCGGAAGCCAATATGGATCAAGAA | 13222 |
| gb:MT019531 | Organism:Severe | ACACACACTGGTACTGGTCAGGCAATAACAGTTACACCGGAAGCCAATATGGATCAAGAA | 13222 |
| gb:MN996528 | Organism:Severe | ACACACACTGGTACTGGTCAGGCAATAACAGTTACACCGGAAGCCAATATGGATCAAGAA | 13222 |
| gb:MN996530 | Organism:Severe | ACACACACTGGTACTGGTCAGGCAATAACAGTTACACCGGAAGCCAATATGGATCAAGAA | 13208 |
| gb:MN908947 | Organism:Severe | ACACACACTGGTACTGGTCAGGCAATAACAGTTACACCGGAAGCCAATATGGATCAAGAA | 13222 |
| gb:MT019532 | Organism:Severe | ACACACACTGGTACTGGTCAGGCAATAACAGTTACACCGGAAGCCAATATGGATCAAGAA | 13222 |

\*\*\*\*\*

|             |                 |                                                             |       |
|-------------|-----------------|-------------------------------------------------------------|-------|
| gb:MT020781 | Organism:Severe | TCCTTTGGTGGTGCATCGTGTGTCTGTACTGCCGTTGCCACATAGATCATCCAAATCCT | 13270 |
| gb:MT007544 | Organism:Severe | TCCTTTGGTGGTGCATCGTGTGTCTGTACTGCCGTTGCCACATAGATCATCCAAATCCT | 13282 |
| gb:MN994467 | Organism:Severe | TCCTTTGGTGGTGCATCGTGTGTCTGTACTGCCGTTGCCACATAGATCATCCAAATCCT | 13282 |
| gb:MT044257 | Organism:Severe | TCCTTTGGTGGTGCATCGTGTGTCTGTACTGCCGTTGCCACATAGATCATCCAAATCCT | 13282 |
| gb:MT106054 | Organism:Severe | TCCTTTGGTGGTGCATCGTGTGTCTGTACTGCCGTTGCCACATAGATCATCCAAATCCT | 13282 |
| gb:MT049951 | Organism:Severe | TCCTTTGGTGGTGCATCGTGTGTCTGTACTGCCGTTGCCACATAGATCATCCAAATCCT | 13282 |
| gb:MN975262 | Organism:Severe | TCCTTTGGTGGTGCATCGTGTGTCTGTACTGCCGTTGCCACATAGATCATCCAAATCCT | 13282 |
| gb:MT106052 | Organism:Severe | TCCTTTGGTGGTGCATCGTGTGTCTGTACTGCCGTTGCCACATAGATCATCCAAATCCT | 13282 |
| gb:LC522975 | Organism:Severe | TCCTTTGGTGGTGCATCGTGTGTCTGTACTGCCGTTGCCACATAGATCATCCAAATCCT | 13279 |
| gb:LC522973 | Organism:Severe | TCCTTTGGTGGTGCATCGTGTGTCTGTACTGCCGTTGCCACATAGATCATCCAAATCCT | 13279 |
| gb:LC522974 | Organism:Severe | TCCTTTGGTGGTGCATCGTGTGTCTGTACTGCCGTTGCCACATAGATCATCCAAATCCT | 13279 |
| gb:MN985325 | Organism:Severe | TCCTTTGGTGGTGCATCGTGTGTCTGTACTGCCGTTGCCACATAGATCATCCAAATCCT | 13282 |
| gb:MT020881 | Organism:Severe | TCCTTTGGTGGTGCATCGTGTGTCTGTACTGCCGTTGCCACATAGATCATCCAAATCCT | 13282 |
| gb:MT020880 | Organism:Severe | TCCTTTGGTGGTGCATCGTGTGTCTGTACTGCCGTTGCCACATAGATCATCCAAATCCT | 13282 |
| gb:MT066175 | Organism:Severe | TCCTTTGGTGGTGCATCGTGTGTCTGTACTGCCGTTGCCACATAGATCATCCAAATCCT | 13282 |
| gb:MN997409 | Organism:Severe | TCCTTTGGTGGTGCATCGTGTGTCTGTACTGCCGTTGCCACATAGATCATCCAAATCCT | 13282 |
| gb:MN938384 | Organism:Severe | TCCTTTGGTGGTGCATCGTGTGTCTGTACTGCCGTTGCCACATAGATCATCCAAATCCT | 13250 |
| gb:MT044258 | Organism:Severe | TCCTTTGGTGGTGCATCGTGTGTCTGTACTGCCGTTGCCACATAGATCATCCAAATCCT | 13258 |
| gb:MT039890 | Organism:Severe | TCCTTTGGTGGTGCATCGTGTGTCTGTACTGCCGTTGCCACATAGATCATCCAAATCCT | 13282 |
| gb:MN988713 | Organism:Severe | TCCTTTGGTGGTGCATCGTGTGTCTGTACTGCCGTTGCCACATAGATCATCCAAATCCT | 13282 |
| gb:LC521925 | Organism:Severe | TCCTTTGGTGGTGCATCGTGTGTCTGTACTGCCGTTGCCACATAGATCATCCAAATCCT | 13255 |
| gb:MT093571 | Organism:Severe | TCGCTTGGTGGTGCATCGTGTGTCTGTACTGCCGTTGCCACATAGATCATCCAAATCCT | 13282 |
| gb:MT039887 | Organism:Severe | TCCTTTGGTGGTGCATCGTGTGTCTGTACTGCCGTTGCCACATAGATCATCCAAATCCT | 13282 |
| gb:MT019530 | Organism:Severe | TCCTTTGGTGGTGCATCGTGTGTCTGTACTGCCGTTGCCACATAGATCATCCAAATCCT | 13282 |
| gb:MT039888 | Organism:Severe | TCCTTTGGTGGTGCATCGTGTGTCTGTACTGCCGTTGCCACATAGATCATCCAAATCCT | 13282 |
| gb:LC522972 | Organism:Severe | TCCTTTGGTGGTGCATCGTGTGTCTGTACTGCCGTTGCCACATAGATCATCCAAATCCT | 13279 |
| gb:MT027063 | Organism:Severe | TCCTTTGGTGGTGCATCGTGTGTCTGTACTGCCGTTGCCACATAGATCATCCAAATCCT | 13282 |
| gb:MT027062 | Organism:Severe | TCCTTTGGTGGTGCATCGTGTGTCTGTACTGCCGTTGCCACATAGATCATCCAAATCCT | 13282 |
| gb:MT019529 | Organism:Severe | TCCTTTGGTGGTGCATCGTGTGTCTGTACTGCCGTTGCCACATAGATCATCCAAATCCT | 13282 |
| gb:MN996529 | Organism:Severe | TCCTTTGGTGGTGCATCGTGTGTCTGTACTGCCGTTGCCACATAGATCATCCAAATCCT | 13270 |
| gb:MN996531 | Organism:Severe | TCCTTTGGTGGTGCATCGTGTGTCTGTACTGCCGTTGCCACATAGATCATCCAAATCCT | 13269 |
| gb:MT066176 | Organism:Severe | TCCTTTGGTGGTGCATCGTGTGTCTGTACTGCCGTTGCCACATAGATCATCCAAATCCT | 13282 |
| gb:MT027064 | Organism:Severe | TCCTTTGGTGGTGCATCGTGTGTCTGTACTGCCGTTGCCACATAGATCATCCAAATCCT | 13282 |
| gb:MN994468 | Organism:Severe | TCCTTTGGTGGTGCATCGTGTGTCTGTACTGCCGTTGCCACATAGATCATCCAAATCCT | 13282 |
| gb:MT072688 | Organism:Severe | TCCTTTGGTGGTGCATCGTGTGTCTGTACTGCCGTTGCCACATAGATCATCCAAATCCT | 13267 |

|             |                 |                                                             |       |
|-------------|-----------------|-------------------------------------------------------------|-------|
| gb:MN996527 | Organism:Severe | TCCTTTGGTGGTGCATCGTGTGTCTGTACTGCCGTTGCCACATAGATCATCCAAATCCT | 13249 |
| gb:MT093631 | Organism:Severe | TCCTTTGGTGGTGCATCGTGTGTCTGTACTGCCGTTGCCACATAGATCATCCAAATCCT | 13320 |
| gb:MT106053 | Organism:Severe | TCCTTTGGTGGTGCATCGTGTGTCTGTACTGCCGTTGCCACATAGATCATCCAAATCCT | 13282 |
| gb:MT019533 | Organism:Severe | TCCTTTGGTGGTGCATCGTGTGTCTGTACTGCCGTTGCCACATAGATCATCCAAATCCT | 13282 |
| gb:MT019531 | Organism:Severe | TCCTTTGGTGGTGCATCGTGTGTCTGTACTGCCGTTGCCACATAGATCATCCAAATCCT | 13282 |
| gb:MN996528 | Organism:Severe | TCCTTTGGTGGTGCATCGTGTGTCTGTACTGCCGTTGCCACATAGATCATCCAAATCCT | 13282 |
| gb:MN996530 | Organism:Severe | TCCTTTGGTGGTGCATCGTGTGTCTGTACTGCCGTTGCCACATAGATCATCCAAATCCT | 13268 |
| gb:MN908947 | Organism:Severe | TCCTTTGGTGGTGCATCGTGTGTCTGTACTGCCGTTGCCACATAGATCATCCAAATCCT | 13282 |
| gb:MT019532 | Organism:Severe | TCCTTTGGTGGTGCATCGTGTGTCTGTACTGCCGTTGCCACATAGATCATCCAAATCCT | 13282 |

\*\* \*\*\*\*\*

|             |                 |                                                              |       |
|-------------|-----------------|--------------------------------------------------------------|-------|
| gb:MT020781 | Organism:Severe | AAAGGATTTTGTGACTTAAAAGGTAAGTATGTACAAATACCTACAACCTGTGCTAATGAC | 13330 |
| gb:MT007544 | Organism:Severe | AAAGGATTTTGTGACTTAAAAGGTAAGTATGTACAAATACCTACAACCTGTGCTAATGAC | 13342 |
| gb:MN994467 | Organism:Severe | AAAGGATTTTGTGACTTAAAAGGTAAGTATGTACAAATACCTACAACCTGTGCTAATGAC | 13342 |
| gb:MT044257 | Organism:Severe | AAAGGATTTTGTGACTTAAAAGGTAAGTATGTACAAATACCTACAACCTGTGCTAATGAC | 13342 |
| gb:MT106054 | Organism:Severe | AAAGGATTTTGTGACTTAAAAGGTAAGTATGTACAAATACCTACAACCTGTGCTAATGAC | 13342 |
| gb:MT049951 | Organism:Severe | AAAGGATTTTGTGACTTAAAAGGTAAGTATGTACAAATACCTACAACCTGTGCTAATGAC | 13342 |
| gb:MN975262 | Organism:Severe | AAAGGATTTTGTGACTTAAAAGGTAAGTATGTACAAATACCTACAACCTGTGCTAATGAC | 13342 |
| gb:MT106052 | Organism:Severe | AAAGGATTTTGTGACTTAAAAGGTAAGTATGTACAAATACCTACAACCTGTGCTAATGAC | 13342 |
| gb:LC522975 | Organism:Severe | AAAGGATTTTGTGACTTAAAAGGTAAGTATGTACAAATACCTACAACCTGTGCTAATGAC | 13339 |
| gb:LC522973 | Organism:Severe | AAAGGATTTTGTGACTTAAAAGGTAAGTATGTACAAATACCTACAACCTGTGCTAATGAC | 13339 |
| gb:LC522974 | Organism:Severe | AAAGGATTTTGTGACTTAAAAGGTAAGTATGTACAAATACCTACAACCTGTGCTAATGAC | 13339 |
| gb:MN985325 | Organism:Severe | AAAGGATTTTGTGACTTAAAAGGTAAGTATGTACAAATACCTACAACCTGTGCTAATGAC | 13342 |
| gb:MT020881 | Organism:Severe | AAAGGATTTTGTGACTTAAAAGGTAAGTATGTACAAATACCTACAACCTGTGCTAATGAC | 13342 |
| gb:MT020880 | Organism:Severe | AAAGGATTTTGTGACTTAAAAGGTAAGTATGTACAAATACCTACAACCTGTGCTAATGAC | 13342 |
| gb:MT066175 | Organism:Severe | AAAGGATTTTGTGACTTAAAAGGTAAGTATGTACAAATACCTACAACCTGTGCTAATGAC | 13342 |
| gb:MN997409 | Organism:Severe | AAAGGATTTTGTGACTTAAAAGGTAAGTATGTACAAATACCTACAACCTGTGCTAATGAC | 13342 |
| gb:MN938384 | Organism:Severe | AAAGGATTTTGTGACTTAAAAGGTAAGTATGTACAAATACCTACAACCTGTGCTAATGAC | 13310 |
| gb:MT044258 | Organism:Severe | AAAGGATTTTGTGACTTAAAAGGTAAGTATGTACAAATACCTACAACCTGTGCTAATGAC | 13318 |
| gb:MT039890 | Organism:Severe | AAAGGATTTTGTGACTTAAAAGGTAAGTATGTACAAATACCTACAACCTGTGCTAATGAC | 13342 |
| gb:MN988713 | Organism:Severe | AAAGGATTTTGTGACTTAAAAGGTAAGTATGTACAAATACCTACAACCTGTGCTAATGAC | 13342 |
| gb:LC521925 | Organism:Severe | AAAGGATTTTGTGACTTAAAAGGTAAGTATGTACAAATACCTACAACCTGTGCTAATGAC | 13315 |
| gb:MT093571 | Organism:Severe | AAAGGATTTTGTGACTTAAAAGGTAAGTATGTACAAATACCTACAACCTGTGCTAATGAC | 13342 |
| gb:MT039887 | Organism:Severe | AAAGGATTTTGTGACTTAAAAGGTAAGTATGTACAAATACCTACAACCTGTGCTAATGAC | 13342 |
| gb:MT019530 | Organism:Severe | AAAGGATTTTGTGACTTAAAAGGTAAGTATGTACAAATACCTACAACCTGTGCTAATGAC | 13342 |
| gb:MT039888 | Organism:Severe | AAAGGATTTTGTGACTTAAAAGGTAAGTATGTACAAATACCTACAACCTGTGCTAATGAC | 13342 |
| gb:LC522972 | Organism:Severe | AAAGGATTTTGTGACTTAAAAGGTAAGTATGTACAAATACCTACAACCTGTGCTAATGAC | 13339 |
| gb:MT027063 | Organism:Severe | AAAGGATTTTGTGACTTAAAAGGTAAGTATGTACAAATACCTACAACCTGTGCTAATGAC | 13342 |
| gb:MT027062 | Organism:Severe | AAAGGATTTTGTGACTTAAAAGGTAAGTATGTACAAATACCTACAACCTGTGCTAATGAC | 13342 |
| gb:MT019529 | Organism:Severe | AAAGGATTTTGTGACTTAAAAGGTAAGTATGTACAAATACCTACAACCTGTGCTAATGAC | 13342 |
| gb:MN996529 | Organism:Severe | AAAGGATTTTGTGACTTAAAAGGTAAGTATGTACAAATACCTACAACCTGTGCTAATGAC | 13330 |
| gb:MN996531 | Organism:Severe | AAAGGATTTTGTGACTTAAAAGGTAAGTATGTACAAATACCTACAACCTGTGCTAATGAC | 13329 |
| gb:MT066176 | Organism:Severe | AAAGGATTTTGTGACTTAAAAGGTAAGTATGTACAAATACCTACAACCTGTGCTAATGAC | 13342 |
| gb:MT027064 | Organism:Severe | AAAGGATTTTGTGACTTAAAAGGTAAGTATGTACAAATACCTACAACCTGTGCTAATGAC | 13342 |
| gb:MN994468 | Organism:Severe | AAAGGATTTTGTGACTTAAAAGGTAAGTATGTACAAATACCTACAACCTGTGCTAATGAC | 13342 |
| gb:MT072688 | Organism:Severe | AAAGGATTTTGTGACTTAAAAGGTAAGTATGTACAAATACCTACAACCTGTGCTAATGAC | 13327 |
| gb:MN996527 | Organism:Severe | AAAGGATTTTGTGACTTAAAAGGTAAGTATGTACAAATACCTACAACCTGTGCTAATGAC | 13309 |
| gb:MT093631 | Organism:Severe | AAAGGATTTTGTGACTTAAAAGGTAAGTATGTACAAATACCTACAACCTGTGCTAATGAC | 13380 |
| gb:MT106053 | Organism:Severe | AAAGGATTTTGTGACTTAAAAGGTAAGTATGTACAAATACCTACAACCTGTGCTAATGAC | 13342 |
| gb:MT019533 | Organism:Severe | AAAGGATTTTGTGACTTAAAAGGTAAGTATGTACAAATACCTACAACCTGTGCTAATGAC | 13342 |
| gb:MT019531 | Organism:Severe | AAAGGATTTTGTGACTTAAAAGGTAAGTATGTACAAATACCTACAACCTGTGCTAATGAC | 13342 |
| gb:MN996528 | Organism:Severe | AAAGGATTTTGTGACTTAAAAGGTAAGTATGTACAAATACCTACAACCTGTGCTAATGAC | 13342 |
| gb:MN996530 | Organism:Severe | AAAGGATTTTGTGACTTAAAAGGTAAGTATGTACAAATACCTACAACCTGTGCTAATGAC | 13328 |
| gb:MN908947 | Organism:Severe | AAAGGATTTTGTGACTTAAAAGGTAAGTATGTACAAATACCTACAACCTGTGCTAATGAC | 13342 |
| gb:MT019532 | Organism:Severe | AAAGGATTTTGTGACTTAAAAGGTAAGTATGTACAAATACCTACAACCTGTGCTAATGAC | 13342 |

\*\*\*\*\*

|             |                 |                                                            |       |
|-------------|-----------------|------------------------------------------------------------|-------|
| gb:MT020781 | Organism:Severe | CCTGTGGGTTTACACTTAAAACACAGTCTGTACCGTCTGCGGTATGTGGAAAGGTTAT | 13390 |
| gb:MT007544 | Organism:Severe | CCTGTGGGTTTACACTTAAAACACAGTCTGTACCGTCTGCGGTATGTGGAAAGGTTAT | 13402 |
| gb:MN994467 | Organism:Severe | CCTGTGGGTTTACACTTAAAACACAGTCTGTACCGTCTGCGGTATGTGGAAAGGTTAT | 13402 |
| gb:MT044257 | Organism:Severe | CCTGTGGGTTTACACTTAAAACACAGTCTGTACCGTCTGCGGTATGTGGAAAGGTTAT | 13402 |
| gb:MT106054 | Organism:Severe | CCTGTGGGTTTACACTTAAAACACAGTCTGTACCGTCTGCGGTATGTGGAAAGGTTAT | 13402 |
| gb:MT049951 | Organism:Severe | CCTGTGGGTTTACACTTAAAACACAGTCTGTACCGTCTGCGGTATGTGGAAAGGTTAT | 13402 |
| gb:MN975262 | Organism:Severe | CCTGTGGGTTTACACTTAAAACACAGTCTGTACCGTCTGCGGTATGTGGAAAGGTTAT | 13402 |
| gb:MT106052 | Organism:Severe | CCTGTGGGTTTACACTTAAAACACAGTCTGTACCGTCTGCGGTATGTGGAAAGGTTAT | 13402 |

|             |                 |                                                            |       |
|-------------|-----------------|------------------------------------------------------------|-------|
| gb:LC522975 | Organism:Severe | CCTGTGGGTTTTACTTAAAAACACAGTCTGTACCGTCTGCGGTATGTGGAAAGGTTAT | 13399 |
| gb:LC522973 | Organism:Severe | CCTGTGGGTTTTACTTAAAAACACAGTCTGTACCGTCTGCGGTATGTGGAAAGGTTAT | 13399 |
| gb:LC522974 | Organism:Severe | CCTGTGGGTTTTACTTAAAAACACAGTCTGTACCGTCTGCGGTATGTGGAAAGGTTAT | 13399 |
| gb:MN985325 | Organism:Severe | CCTGTGGGTTTTACTTAAAAACACAGTCTGTACCGTCTGCGGTATGTGGAAAGGTTAT | 13402 |
| gb:MT020881 | Organism:Severe | CCTGTGGGTTTTACTTAAAAACACAGTCTGTACCGTCTGCGGTATGTGGAAAGGTTAT | 13402 |
| gb:MT020880 | Organism:Severe | CCTGTGGGTTTTACTTAAAAACACAGTCTGTACCGTCTGCGGTATGTGGAAAGGTTAT | 13402 |
| gb:MT066175 | Organism:Severe | CCTGTGGGTTTTACTTAAAAACACAGTCTGTACCGTCTGCGGTATGTGGAAAGGTTAT | 13402 |
| gb:MN997409 | Organism:Severe | CCTGTGGGTTTTACTTAAAAACACAGTCTGTACCGTCTGCGGTATGTGGAAAGGTTAT | 13402 |
| gb:MN938384 | Organism:Severe | CCTGTGGGTTTTACTTAAAAACACAGTCTGTACCGTCTGCGGTATGTGGAAAGGTTAT | 13370 |
| gb:MT044258 | Organism:Severe | CCTGTGGGTTTTACTTAAAAACACAGTCTGTACCGTCTGCGGTATGTGGAAAGGTTAT | 13378 |
| gb:MT039890 | Organism:Severe | CCTGTGGGTTTTACTTAAAAACACAGTCTGTACCGTCTGCGGTATGTGGAAAGGTTAT | 13402 |
| gb:MN988713 | Organism:Severe | CCTGTGGGTTTTACTTAAAAACACAGTCTGTACCGTCTGCGGTATGTGGAAAGGTTAT | 13402 |
| gb:LC521925 | Organism:Severe | CCTGTGGGTTTTACTTAAAAACACAGTCTGTACCGTCTGCGGTATGTGGAAAGGTTAT | 13375 |
| gb:MT093571 | Organism:Severe | CCTGTGGGTTTTACTTAAAAACACAGTCTGTACCGTCTGCGGTATGTGGAAAGGTTAT | 13402 |
| gb:MT039887 | Organism:Severe | CCTGTGGGTTTTACTTAAAAACACAGTCTGTACCGTCTGCGGTATGTGGAAAGGTTAT | 13402 |
| gb:MT019530 | Organism:Severe | CCTGTGGGTTTTACTTAAAAACACAGTCTGTACCGTCTGCGGTATGTGGAAAGGTTAT | 13402 |
| gb:MT039888 | Organism:Severe | CCTGTGGGTTTTACTTAAAAACACAGTCTGTACCGTCTGCGGTATGTGGAAAGGTTAT | 13402 |
| gb:LC522972 | Organism:Severe | CCTGTGGGTTTTACTTAAAAACACAGTCTGTACCGTCTGCGGTATGTGGAAAGGTTAT | 13399 |
| gb:MT027063 | Organism:Severe | CCTGTGGGTTTTACTTAAAAACACAGTCTGTACCGTCTGCGGTATGTGGAAAGGTTAT | 13402 |
| gb:MT027062 | Organism:Severe | CCTGTGGGTTTTACTTAAAAACACAGTCTGTACCGTCTGCGGTATGTGGAAAGGTTAT | 13402 |
| gb:MT019529 | Organism:Severe | CCTGTGGGTTTTACTTAAAAACACAGTCTGTACCGTCTGCGGTATGTGGAAAGGTTAT | 13402 |
| gb:MN996529 | Organism:Severe | CCTGTGGGTTTTACTTAAAAACACAGTCTGTACCGTCTGCGGTATGTGGAAAGGTTAT | 13390 |
| gb:MN996531 | Organism:Severe | CCTGTGGGTTTTACTTAAAAACACAGTCTGTACCGTCTGCGGTATGTGGAAAGGTTAT | 13389 |
| gb:MT066176 | Organism:Severe | CCTGTGGGTTTTACTTAAAAACACAGTCTGTACCGTCTGCGGTATGTGGAAAGGTTAT | 13402 |
| gb:MT027064 | Organism:Severe | CCTGTGGGTTTTACTTAAAAACACAGTCTGTACCGTCTGCGGTATGTGGAAAGGTTAT | 13402 |
| gb:MN994468 | Organism:Severe | CCTGTGGGTTTTACTTAAAAACACAGTCTGTACCGTCTGCGGTATGTGGAAAGGTTAT | 13402 |
| gb:MT072688 | Organism:Severe | CCTGTGGGTTTTACTTAAAAACACAGTCTGTACCGTCTGCGGTATGTGGAAAGGTTAT | 13387 |
| gb:MN996527 | Organism:Severe | CCTGTGGGTTTTACTTAAAAACACAGTCTGTACCGTCTGCGGTATGTGGAAAGGTTAT | 13369 |
| gb:MT093631 | Organism:Severe | CCTGTGGGTTTTACTTAAAAACACAGTCTGTACCGTCTGCGGTATGTGGAAAGGTTAT | 13440 |
| gb:MT106053 | Organism:Severe | CCTGTGGGTTTTACTTAAAAACACAGTCTGTACCGTCTGCGGTATGTGGAAAGGTTAT | 13402 |
| gb:MT019533 | Organism:Severe | CCTGTGGGTTTTACTTAAAAACACAGTCTGTACCGTCTGCGGTATGTGGAAAGGTTAT | 13402 |
| gb:MT019531 | Organism:Severe | CCTGTGGGTTTTACTTAAAAACACAGTCTGTACCGTCTGCGGTATGTGGAAAGGTTAT | 13402 |
| gb:MN996528 | Organism:Severe | CCTGTGGGTTTTACTTAAAAACACAGTCTGTACCGTCTGCGGTATGTGGAAAGGTTAT | 13402 |
| gb:MN996530 | Organism:Severe | CCTGTGGGTTTTACTTAAAAACACAGTCTGTACCGTCTGCGGTATGTGGAAAGGTTAT | 13388 |
| gb:MN908947 | Organism:Severe | CCTGTGGGTTTTACTTAAAAACACAGTCTGTACCGTCTGCGGTATGTGGAAAGGTTAT | 13402 |
| gb:MT019532 | Organism:Severe | CCTGTGGGTTTTACTTAAAAACACAGTCTGTACCGTCTGCGGTATGTGGAAAGGTTAT | 13402 |

\*\*\*\*\*

|             |                 |                                                              |       |
|-------------|-----------------|--------------------------------------------------------------|-------|
| gb:MT020781 | Organism:Severe | GGCTGTAGTTGTGATCAACTCCGCGAACCCATGCTTCAGTCAGTGTATGCACAATCGTTT | 13450 |
| gb:MT007544 | Organism:Severe | GGCTGTAGTTGTGATCAACTCCGCGAACCCATGCTTCAGTCAGTGTATGCACAATCGTTT | 13462 |
| gb:MN994467 | Organism:Severe | GGCTGTAGTTGTGATCAACTCCGCGAACCCATGCTTCAGTCAGTGTATGCACAATCGTTT | 13462 |
| gb:MT044257 | Organism:Severe | GGCTGTAGTTGTGATCAACTCCGCGAACCCATGCTTCAGTCAGTGTATGCACAATCGTTT | 13462 |
| gb:MT106054 | Organism:Severe | GGCTGTAGTTGTGATCAACTCCGCGAACCCATGCTTCAGTCAGTGTATGCACAATCGTTT | 13462 |
| gb:MT049951 | Organism:Severe | GGCTGTAGTTGTGATCAACTCCGCGAACCCATGCTTCAGTCAGTGTATGCACAATCGTTT | 13462 |
| gb:MN975262 | Organism:Severe | GGCTGTAGTTGTGATCAACTCCGCGAACCCATGCTTCAGTCAGTGTATGCACAATCGTTT | 13462 |
| gb:MT106052 | Organism:Severe | GGCTGTAGTTGTGATCAACTCCGCGAACCCATGCTTCAGTCAGTGTATGCACAATCGTTT | 13462 |
| gb:LC522975 | Organism:Severe | GGCTGTAGTTGTGATCAACTCCGCGAACCCATGCTTCAGTCAGTGTATGCACAATCGTTT | 13459 |
| gb:LC522973 | Organism:Severe | GGCTGTAGTTGTGATCAACTCCGCGAACCCATGCTTCAGTCAGTGTATGCACAATCGTTT | 13459 |
| gb:LC522974 | Organism:Severe | GGCTGTAGTTGTGATCAACTCCGCGAACCCATGCTTCAGTCAGTGTATGCACAATCGTTT | 13459 |
| gb:MN985325 | Organism:Severe | GGCTGTAGTTGTGATCAACTCCGCGAACCCATGCTTCAGTCAGTGTATGCACAATCGTTT | 13462 |
| gb:MT020881 | Organism:Severe | GGCTGTAGTTGTGATCAACTCCGCGAACCCATGCTTCAGTCAGTGTATGCACAATCGTTT | 13462 |
| gb:MT020880 | Organism:Severe | GGCTGTAGTTGTGATCAACTCCGCGAACCCATGCTTCAGTCAGTGTATGCACAATCGTTT | 13462 |
| gb:MT066175 | Organism:Severe | GGCTGTAGTTGTGATCAACTCCGCGAACCCATGCTTCAGTCAGTGTATGCACAATCGTTT | 13462 |
| gb:MN997409 | Organism:Severe | GGCTGTAGTTGTGATCAACTCCGCGAACCCATGCTTCAGTCAGTGTATGCACAATCGTTT | 13462 |
| gb:MN938384 | Organism:Severe | GGCTGTAGTTGTGATCAACTCCGCGAACCCATGCTTCAGTCAGTGTATGCACAATCGTTT | 13430 |
| gb:MT044258 | Organism:Severe | GGCTGTAGTTGTGATCAACTCCGCGAACCCATGCTTCAGTCAGTGTATGCACAATCGTTT | 13438 |
| gb:MT039890 | Organism:Severe | GGCTGTAGTTGTGATCAACTCCGCGAACCCATGCTTCAGTCAGTGTATGCACAATCGTTT | 13462 |
| gb:MN988713 | Organism:Severe | GGCTGTAGTTGTGATCAACTCCGCGAACCCATGCTTCAGTCAGTGTATGCACAATCGTTT | 13462 |
| gb:LC521925 | Organism:Severe | GGCTGTAGTTGTGATCAACTCCGCGAACCCATGCTTCAGTCAGTGTATGCACAATCGTTT | 13435 |
| gb:MT093571 | Organism:Severe | GGCTGTAGTTGTGATCAACTCCGCGAACCCATGCTTCAGTCAGTGTATGCACAATCGTTT | 13462 |
| gb:MT039887 | Organism:Severe | GGCTGTAGTTGTGATCAACTCCGCGAACCCATGCTTCAGTCAGTGTATGCACAATCGTTT | 13462 |
| gb:MT019530 | Organism:Severe | GGCTGTAGTTGTGATCAACTCCGCGAACCCATGCTTCAGTCAGTGTATGCACAATCGTTT | 13462 |
| gb:MT039888 | Organism:Severe | GGCTGTAGTTGTGATCAACTCCGCGAACCCATGCTTCAGTCAGTGTATGCACAATCGTTT | 13462 |
| gb:LC522972 | Organism:Severe | GGCTGTAGTTGTGATCAACTCCGCGAACCCATGCTTCAGTCAGTGTATGCACAATCGTTT | 13459 |
| gb:MT027063 | Organism:Severe | GGCTGTAGTTGTGATCAACTCCGCGAACCCATGCTTCAGTCAGTGTATGCACAATCGTTT | 13462 |





|             |                 |                                                              |       |
|-------------|-----------------|--------------------------------------------------------------|-------|
| gb:MT020781 | Organism:Severe | CTGATGTCGTATACAGGGCTTTTGACATCTACAATGATAAAGTAGCTGGTTTTGCTAAAT | 13570 |
| gb:MT007544 | Organism:Severe | CTGATGTCGTATACAGGGCTTTTGACATCTACAATGATAAAGTAGCTGGTTTTGCTAAAT | 13582 |
| gb:MN994467 | Organism:Severe | CTGATGTCGTATACAGGGCTTTTGACATCTACAATGATAAAGTAGCTGGTTTTGCTAAAT | 13582 |
| gb:MT044257 | Organism:Severe | CTGATGTCGTATACAGGGCTTTTGACATCTACAATGATAAAGTAGCTGGTTTTGCTAAAT | 13582 |
| gb:MT106054 | Organism:Severe | CTGATGTCGTATACAGGGCTTTTGACATCTACAATGATAAAGTAGCTGGTTTTGCTAAAT | 13582 |
| gb:MT049951 | Organism:Severe | CTGATGTCGTATACAGGGCTTTTGACATCTACAATGATAAAGTAGCTGGTTTTGCTAAAT | 13582 |
| gb:MN975262 | Organism:Severe | CTGATGTCGTATACAGGGCTTTTGACATCTACAATGATAAAGTAGCTGGTTTTGCTAAAT | 13582 |
| gb:MT106052 | Organism:Severe | CTGATGTCGTATACAGGGCTTTTGACATCTACAATGATAAAGTAGCTGGTTTTGCTAAAT | 13582 |
| gb:LC522975 | Organism:Severe | CTGATGTCGTATACAGGGCTTTTGACATCTACAATGATAAAGTAGCTGGTTTTGCTAAAT | 13579 |
| gb:LC522973 | Organism:Severe | CTGATGTCGTATACAGGGCTTTTGACATCTACAATGATAAAGTAGCTGGTTTTGCTAAAT | 13579 |
| gb:LC522974 | Organism:Severe | CTGATGTCGTATACAGGGCTTTTGACATCTACAATGATAAAGTAGCTGGTTTTGCTAAAT | 13579 |
| gb:MN985325 | Organism:Severe | CTGATGTCGTATACAGGGCTTTTGACATCTACAATGATAAAGTAGCTGGTTTTGCTAAAT | 13582 |
| gb:MT020881 | Organism:Severe | CTGATGTCGTATACAGGGCTTTTGACATCTACAATGATAAAGTAGCTGGTTTTGCTAAAT | 13582 |
| gb:MT020880 | Organism:Severe | CTGATGTCGTATACAGGGCTTTTGACATCTACAATGATAAAGTAGCTGGTTTTGCTAAAT | 13582 |
| gb:MT066175 | Organism:Severe | CTGATGTCGTATACAGGGCTTTTGACATCTACAATGATAAAGTAGCTGGTTTTGCTAAAT | 13582 |
| gb:MN997409 | Organism:Severe | CTGATGTCGTATACAGGGCTTTTGACATCTACAATGATAAAGTAGCTGGTTTTGCTAAAT | 13582 |
| gb:MN938384 | Organism:Severe | CTGATGTCGTATACAGGGCTTTTGACATCTACAATGATAAAGTAGCTGGTTTTGCTAAAT | 13550 |
| gb:MT044258 | Organism:Severe | CTGATGTCGTATACAGGGCTTTTGACATCTACAATGATAAAGTAGCTGGTTTTGCTAAAT | 13558 |
| gb:MT039890 | Organism:Severe | CTGATGTCGTATACAGGGCTTTTGACATCTACAATGATAAAGTAGCTGGTTTTGCTAAAT | 13582 |
| gb:MN988713 | Organism:Severe | CTGATGTCGTATACAGGGCTTTTGACATCTACAATGATAAAGTAGCTGGTTTTGCTAAAT | 13582 |
| gb:LC521925 | Organism:Severe | CTGATGTCGTATACAGGGCTTTTGACATCTACAATGATAAAGTAGCTGGTTTTGCTAAAT | 13555 |
| gb:MT093571 | Organism:Severe | CTGATGTCGTATACAGGGCTTTTGACATCTACAATGATAAAGTAGCTGGTTTTGCTAAAT | 13582 |
| gb:MT039887 | Organism:Severe | CTGATGTCGTATACAGGGCTTTTGACATCTACAATGATAAAGTAGCTGGTTTTGCTAAAT | 13582 |
| gb:MT019530 | Organism:Severe | CTGATGTCGTATACAGGGCTTTTGACATCTACAATGATAAAGTAGCTGGTTTTGCTAAAT | 13582 |
| gb:MT039888 | Organism:Severe | CTGATGTCGTATACAGGGCTTTTGACATCTACAATGATAAAGTAGCTGGTTTTGCTAAAT | 13582 |
| gb:LC522972 | Organism:Severe | CTGATGTCGTATACAGGGCTTTTGACATCTACAATGATAAAGTAGCTGGTTTTGCTAAAT | 13579 |
| gb:MT027063 | Organism:Severe | CTGATGTCGTATACAGGGCTTTTGACATCTACAATGATAAAGTAGCTGGTTTTGCTAAAT | 13582 |
| gb:MT027062 | Organism:Severe | CTGATGTCGTATACAGGGCTTTTGACATCTACAATGATAAAGTAGCTGGTTTTGCTAAAT | 13582 |
| gb:MT019529 | Organism:Severe | CTGATGTCGTATACAGGGCTTTTGACATCTACAATGATAAAGTAGCTGGTTTTGCTAAAT | 13582 |
| gb:MN996529 | Organism:Severe | CTGATGTCGTATACAGGGCTTTTGACATCTACAATGATAAAGTAGCTGGTTTTGCTAAAT | 13570 |
| gb:MN996531 | Organism:Severe | CTGATGTCGTATACAGGGCTTTTGACATCTACAATGATAAAGTAGCTGGTTTTGCTAAAT | 13569 |
| gb:MT066176 | Organism:Severe | CTGATGTCGTATACAGGGCTTTTGACATCTACAATGATAAAGTAGCTGGTTTTGCTAAAT | 13582 |
| gb:MT027064 | Organism:Severe | CTGATGTCGTATACAGGGCTTTTGACATCTACAATGATAAAGTAGCTGGTTTTGCTAAAT | 13582 |
| gb:MN994468 | Organism:Severe | CTGATGTCGTATACAGGGCTTTTGACATCTACAATGATAAAGTAGCTGGTTTTGCTAAAT | 13582 |
| gb:MT072688 | Organism:Severe | CTGATGTCGTATACAGGGCTTTTGACATCTACAATGATAAAGTAGCTGGTTTTGCTAAAT | 13567 |
| gb:MN996527 | Organism:Severe | CTGATGTCGTATACAGGGCTTTTGACATCTACAATGATAAAGTAGCTGGTTTTGCTAAAT | 13549 |
| gb:MT093631 | Organism:Severe | CTGATGTCGTATACAGGGCTTTTGACATCTACAATGATAAAGTAGCTGGTTTTGCTAAAT | 13620 |
| gb:MT106053 | Organism:Severe | CTGATGTCGTATACAGGGCTTTTGACATCTACAATGATAAAGTAGCTGGTTTTGCTAAAT | 13582 |
| gb:MT019533 | Organism:Severe | CTGATGTCGTATACAGGGCTTTTGACATCTACAATGATAAAGTAGCTGGTTTTGCTAAAT | 13582 |
| gb:MT019531 | Organism:Severe | CTGATGTCGTATACAGGGCTTTTGACATCTACAATGATAAAGTAGCTGGTTTTGCTAAAT | 13582 |
| gb:MN996528 | Organism:Severe | CTGATGTCGTATACAGGGCTTTTGACATCTACAATGATAAAGTAGCTGGTTTTGCTAAAT | 13582 |
| gb:MN996530 | Organism:Severe | CTGATGTCGTATACAGGGCTTTTGACATCTACAATGATAAAGTAGCTGGTTTTGCTAAAT | 13568 |
| gb:MN908947 | Organism:Severe | CTGATGTCGTATACAGGGCTTTTGACATCTACAATGATAAAGTAGCTGGTTTTGCTAAAT | 13582 |
| gb:MT019532 | Organism:Severe | CTGATGTCGTATACAGGGCTTTTGACATCTACAATGATAAAGTAGCTGGTTTTGCTAAAT | 13582 |

\*\*\*\*\*

|             |                 |                                                             |       |
|-------------|-----------------|-------------------------------------------------------------|-------|
| gb:MT020781 | Organism:Severe | TCCTAAAACTAATTGTTGTCGCTTCCAAGAAAAGGACGAAGATGACAATTTAATTGATT | 13630 |
| gb:MT007544 | Organism:Severe | TCCTAAAACTAATTGTTGTCGCTTCCAAGAAAAGGACGAAGATGACAATTTAATTGATT | 13642 |
| gb:MN994467 | Organism:Severe | TCCTAAAACTAATTGTTGTCGCTTCCAAGAAAAGGACGAAGATGACAATTTAATTGATT | 13642 |
| gb:MT044257 | Organism:Severe | TCCTAAAACTAATTGTTGTCGCTTCCAAGAAAAGGACGAAGATGACAATTTAATTGATT | 13642 |
| gb:MT106054 | Organism:Severe | TCCTAAAACTAATTGTTGTCGCTTCCAAGAAAAGGACGAAGATGACAATTTAATTGATT | 13642 |
| gb:MT049951 | Organism:Severe | TCCTAAAACTAATTGTTGTCGCTTCCAAGAAAAGGACGAAGATGACAATTTAATTGATT | 13642 |
| gb:MN975262 | Organism:Severe | TCCTAAAACTAATTGTTGTCGCTTCCAAGAAAAGGACGAAGATGACAATTTAATTGATT | 13642 |
| gb:MT106052 | Organism:Severe | TCCTAAAACTAATTGTTGTCGCTTCCAAGAAAAGGACGAAGATGACAATTTAATTGATT | 13642 |
| gb:LC522975 | Organism:Severe | TCCTAAAACTAATTGTTGTCGCTTCCAAGAAAAGGACGAAGATGACAATTTAATTGATT | 13639 |
| gb:LC522973 | Organism:Severe | TCCTAAAACTAATTGTTGTCGCTTCCAAGAAAAGGACGAAGATGACAATTTAATTGATT | 13639 |
| gb:LC522974 | Organism:Severe | TCCTAAAACTAATTGTTGTCGCTTCCAAGAAAAGGACGAAGATGACAATTTAATTGATT | 13639 |
| gb:MN985325 | Organism:Severe | TCCTAAAACTAATTGTTGTCGCTTCCAAGAAAAGGACGAAGATGACAATTTAATTGATT | 13642 |
| gb:MT020881 | Organism:Severe | TCCTAAAACTAATTGTTGTCGCTTCCAAGAAAAGGACGAAGATGACAATTTAATTGATT | 13642 |
| gb:MT020880 | Organism:Severe | TCCTAAAACTAATTGTTGTCGCTTCCAAGAAAAGGACGAAGATGACAATTTAATTGATT | 13642 |
| gb:MT066175 | Organism:Severe | TCCTAAAACTAATTGTTGTCGCTTCCAAGAAAAGGACGAAGATGACAATTTAATTGATT | 13642 |
| gb:MN997409 | Organism:Severe | TCCTAAAACTAATTGTTGTCGCTTCCAAGAAAAGGACGAAGATGACAATTTAATTGATT | 13642 |
| gb:MN938384 | Organism:Severe | TCCTAAAACTAATTGTTGTCGCTTCCAAGAAAAGGACGAAGATGACAATTTAATTGATT | 13610 |
| gb:MT044258 | Organism:Severe | TCCTAAAACTAATTGTTGTCGCTTCCAAGAAAAGGACGAAGATGACAATTTAATTGATT | 13618 |
| gb:MT039890 | Organism:Severe | TCCTAAAACTAATTGTTGTCGCTTCCAAGAAAAGGACGAAGATGACAATTTAATTGATT | 13642 |

|             |                 |                                                             |       |
|-------------|-----------------|-------------------------------------------------------------|-------|
| gb:MN988713 | Organism:Severe | TCCTAAAACTAATTGTTGTCGCTTCCAAGAAAAGGACGAAGATGACAATTTAATTGATT | 13642 |
| gb:LC521925 | Organism:Severe | TCCTAAAACTAATTGTTGTCGCTTCCAAGAAAAGGACGAAGATGACAATTTAATTGATT | 13615 |
| gb:MT093571 | Organism:Severe | TCCTAAAACTAATTGTTGTCGCTTCCAAGAAAAGGACGAAGATGACAATTTAATTGATT | 13642 |
| gb:MT039887 | Organism:Severe | TCCTAAAACTAATTGTTGTCGCTTCCAAGAAAAGGACGAAGATGACAATTTAATTGATT | 13642 |
| gb:MT019530 | Organism:Severe | TCCTAAAACTAATTGTTGTCGCTTCCAAGAAAAGGACGAAGATGACAATTTAATTGATT | 13642 |
| gb:MT039888 | Organism:Severe | TCCTAAAACTAATTGTTGTCGCTTCCAAGAAAAGGACGAAGATGACAATTTAATTGATT | 13642 |
| gb:LC522972 | Organism:Severe | TCCTAAAACTAATTGTTGTCGCTTCCAAGAAAAGGACGAAGATGACAATTTAATTGATT | 13639 |
| gb:MT027063 | Organism:Severe | TCCTAAAACTAATTGTTGTCGCTTCCAAGAAAAGGACGAAGATGACAATTTAATTGATT | 13642 |
| gb:MT027062 | Organism:Severe | TCCTAAAACTAATTGTTGTCGCTTCCAAGAAAAGGACGAAGATGACAATTTAATTGATT | 13642 |
| gb:MT019529 | Organism:Severe | TCCTAAAACTAATTGTTGTCGCTTCCAAGAAAAGGACGAAGATGACAATTTAATTGATT | 13642 |
| gb:MN996529 | Organism:Severe | TCCTAAAACTAATTGTTGTCGCTTCCAAGAAAAGGACGAAGATGACAATTTAATTGATT | 13630 |
| gb:MN996531 | Organism:Severe | TCCTAAAACTAATTGTTGTCGCTTCCAAGAAAAGGACGAAGATGACAATTTAATTGATT | 13629 |
| gb:MT066176 | Organism:Severe | TCCTAAAACTAATTGTTGTCGCTTCCAAGAAAAGGACGAAGATGACAATTTAATTGATT | 13642 |
| gb:MT027064 | Organism:Severe | TCCTAAAACTAATTGTTGTCGCTTCCAAGAAAAGGACGAAGATGACAATTTAATTGATT | 13642 |
| gb:MN994468 | Organism:Severe | TCCTAAAACTAATTGTTGTCGCTTCCAAGAAAAGGACGAAGATGACAATTTAATTGATT | 13642 |
| gb:MT072688 | Organism:Severe | TCCTAAAACTAATTGTTGTCGCTTCCAAGAAAAGGACGAAGATGACAATTTAATTGATT | 13627 |
| gb:MN996527 | Organism:Severe | TCCTAAAACTAATTGTTGTCGCTTCCAAGAAAAGGACGAAGATGACAATTTAATTGATT | 13609 |
| gb:MT093631 | Organism:Severe | TCCTAAAACTAATTGTTGTCGCTTCCAAGAAAAGGACGAAGATGACAATTTAATTGATT | 13680 |
| gb:MT106053 | Organism:Severe | TCCTAAAACTAATTGTTGTCGCTTCCAAGAAAAGGACGAAGATGACAATTTAATTGATT | 13642 |
| gb:MT019533 | Organism:Severe | TCCTAAAACTAATTGTTGTCGCTTCCAAGAAAAGGACGAAGATGACAATTTAATTGATT | 13642 |
| gb:MT019531 | Organism:Severe | TCCTAAAACTAATTGTTGTCGCTTCCAAGAAAAGGACGAAGATGACAATTTAATTGATT | 13642 |
| gb:MN996528 | Organism:Severe | TCCTAAAACTAATTGTTGTCGCTTCCAAGAAAAGGACGAAGATGACAATTTAATTGATT | 13642 |
| gb:MN996530 | Organism:Severe | TCCTAAAACTAATTGTTGTCGCTTCCAAGAAAAGGACGAAGATGACAATTTAATTGATT | 13628 |
| gb:MN908947 | Organism:Severe | TCCTAAAACTAATTGTTGTCGCTTCCAAGAAAAGGACGAAGATGACAATTTAATTGATT | 13642 |
| gb:MT019532 | Organism:Severe | TCCTAAAACTAATTGTTGTCGCTTCCAAGAAAAGGACGAAGATGACAATTTAATTGATT | 13642 |

\*\*\*\*\*

|             |                 |                                                              |       |
|-------------|-----------------|--------------------------------------------------------------|-------|
| gb:MT020781 | Organism:Severe | CTTACTTTGTAGTTAAGAGACACACTTTCTCTAACTACCAACATGAAGAAACAATTTATA | 13690 |
| gb:MT007544 | Organism:Severe | CTTACTTTGTAGTTAAGAGACACACTTTCTCTAACTACCAACATGAAGAAACAATTTATA | 13702 |
| gb:MN994467 | Organism:Severe | CTTACTTTGTAGTTAAGAGACACACTTTCTCTAACTACCAACATGAAGAAACAATTTATA | 13702 |
| gb:MT044257 | Organism:Severe | CTTACTTTGTAGTTAAGAGACACACTTTCTCTAACTACCAACATGAAGAAACAATTTATA | 13702 |
| gb:MT106054 | Organism:Severe | CTTACTTTGTAGTTAAGAGACACACTTTCTCTAACTACCAACATGAAGAAACAATTTATA | 13702 |
| gb:MT049951 | Organism:Severe | CTTACTTTGTAGTTAAGAGACACACTTTCTCTAACTACCAACATGAAGAAACAATTTATA | 13702 |
| gb:MN975262 | Organism:Severe | CTTACTTTGTAGTTAAGAGACACACTTTCTCTAACTACCAACATGAAGAAACAATTTATA | 13702 |
| gb:MT106052 | Organism:Severe | CTTACTTTGTAGTTAAGAGACACACTTTCTCTAACTACCAACATGAAGAAACAATTTATA | 13702 |
| gb:LC522975 | Organism:Severe | CTTACTTTGTAGTTAAGAGACACACTTTCTCTAACTACCAACATGAAGAAACAATTTATA | 13699 |
| gb:LC522973 | Organism:Severe | CTTACTTTGTAGTTAAGAGACACACTTTCTCTAACTACCAACATGAAGAAACAATTTATA | 13699 |
| gb:LC522974 | Organism:Severe | CTTACTTTGTAGTTAAGAGACACACTTTCTCTAACTACCAACATGAAGAAACAATTTATA | 13699 |
| gb:MN985325 | Organism:Severe | CTTACTTTGTAGTTAAGAGACACACTTTCTCTAACTACCAACATGAAGAAACAATTTATA | 13702 |
| gb:MT020881 | Organism:Severe | CTTACTTTGTAGTTAAGAGACACACTTTCTCTAACTACCAACATGAAGAAACAATTTATA | 13702 |
| gb:MT020880 | Organism:Severe | CTTACTTTGTAGTTAAGAGACACACTTTCTCTAACTACCAACATGAAGAAACAATTTATA | 13702 |
| gb:MT066175 | Organism:Severe | CTTACTTTGTAGTTAAGAGACACACTTTCTCTAACTACCAACATGAAGAAACAATTTATA | 13702 |
| gb:MN997409 | Organism:Severe | CTTACTTTGTAGTTAAGAGACACACTTTCTCTAACTACCAACATGAAGAAACAATTTATA | 13702 |
| gb:MN938384 | Organism:Severe | CTTACTTTGTAGTTAAGAGACACACTTTCTCTAACTACCAACATGAAGAAACAATTTATA | 13670 |
| gb:MT044258 | Organism:Severe | CTTACTTTGTAGTTAAGAGACACACTTTCTCTAACTACCAACATGAAGAAACAATTTATA | 13678 |
| gb:MT039890 | Organism:Severe | CTTACTTTGTAGTTAAGAGACACACTTTCTCTAACTACCAACATGAAGAAACAATTTATA | 13702 |
| gb:MN988713 | Organism:Severe | CTTACTTTGTAGTTAAGAGACACACTTTCTCTAACTACCAACATGAAGAAACAATTTATA | 13702 |
| gb:LC521925 | Organism:Severe | CTTACTTTGTAGTTAAGAGACACACTTTCTCTAACTACCAACATGAAGAAACAATTTATA | 13675 |
| gb:MT093571 | Organism:Severe | CTTACTTTGTAGTTAAGAGACACACTTTCTCTAACTACCAACATGAAGAAACAATTTATA | 13702 |
| gb:MT039887 | Organism:Severe | CTTACTTTGTAGTTAAGAGACACACTTTCTCTAACTACCAACATGAAGAAACAATTTATA | 13702 |
| gb:MT019530 | Organism:Severe | CTTACTTTGTAGTTAAGAGACACACTTTCTCTAACTACCAACATGAAGAAACAATTTATA | 13702 |
| gb:MT039888 | Organism:Severe | CTTACTTTGTAGTTAAGAGACACACTTTCTCTAACTACCAACATGAAGAAACAATTTATA | 13702 |
| gb:LC522972 | Organism:Severe | CTTACTTTGTAGTTAAGAGACACACTTTCTCTAACTACCAACATGAAGAAACAATTTATA | 13699 |
| gb:MT027063 | Organism:Severe | CTTACTTTGTAGTTAAGAGACACACTTTCTCTAACTACCAACATGAAGAAACAATTTATA | 13702 |
| gb:MT027062 | Organism:Severe | CTTACTTTGTAGTTAAGAGACACACTTTCTCTAACTACCAACATGAAGAAACAATTTATA | 13702 |
| gb:MT019529 | Organism:Severe | CTTACTTTGTAGTTAAGAGACACACTTTCTCTAACTACCAACATGAAGAAACAATTTATA | 13702 |
| gb:MN996529 | Organism:Severe | CTTACTTTGTAGTTAAGAGACACACTTTCTCTAACTACCAACATGAAGAAACAATTTATA | 13690 |
| gb:MN996531 | Organism:Severe | CTTACTTTGTAGTTAAGAGACACACTTTCTCTAACTACCAACATGAAGAAACAATTTATA | 13689 |
| gb:MT066176 | Organism:Severe | CTTACTTTGTAGTTAAGAGACACACTTTCTCTAACTACCAACATGAAGAAACAATTTATA | 13702 |
| gb:MT027064 | Organism:Severe | CTTACTTTGTAGTTAAGAGACACACTTTCTCTAACTACCAACATGAAGAAACAATTTATA | 13702 |
| gb:MN994468 | Organism:Severe | CTTACTTTGTAGTTAAGAGACACACTTTCTCTAACTACCAACATGAAGAAACAATTTATA | 13702 |
| gb:MT072688 | Organism:Severe | CTTACTTTGTAGTTAAGAGACACACTTTCTCTAACTACCAACATGAAGAAACAATTTATA | 13687 |
| gb:MN996527 | Organism:Severe | CTTACTTTGTAGTTAAGAGACACACTTTCTCTAACTACCAACATGAAGAAACAATTTATA | 13669 |
| gb:MT093631 | Organism:Severe | CTTACTTTGTAGTTAAGAGACACACTTTCTCTAACTACCAACATGAAGAAACAATTTATA | 13740 |
| gb:MT106053 | Organism:Severe | CTTACTTTGTAGTTAAGAGACACACTTTCTCTAACTACCAACATGAAGAAACAATTTATA | 13702 |

|             |                 |                                                              |       |
|-------------|-----------------|--------------------------------------------------------------|-------|
| gb:MT019533 | Organism:Severe | CTTACTTTGTAGTTAAGAGACACACTTTCTCTAACTACCAACATGAAGAAACAATTTATA | 13702 |
| gb:MT019531 | Organism:Severe | CTTACTTTGTAGTTAAGAGACACACTTTCTCTAACTACCAACATGAAGAAACAATTTATA | 13702 |
| gb:MN996528 | Organism:Severe | CTTACTTTGTAGTTAAGAGACACACTTTCTCTAACTACCAACATGAAGAAACAATTTATA | 13702 |
| gb:MN996530 | Organism:Severe | CTTACTTTGTAGTTAAGAGACACACTTTCTCTAACTACCAACATGAAGAAACAATTTATA | 13688 |
| gb:MN908947 | Organism:Severe | CTTACTTTGTAGTTAAGAGACACACTTTCTCTAACTACCAACATGAAGAAACAATTTATA | 13702 |
| gb:MT019532 | Organism:Severe | CTTACTTTGTAGTTAAGAGACACACTTTCTCTAACTACCAACATGAAGAAACAATTTATA | 13702 |

\*\*\*\*\*

|             |                 |                                                              |       |
|-------------|-----------------|--------------------------------------------------------------|-------|
| gb:MT020781 | Organism:Severe | ATTTACTTAAGGATTGTCCAGCTGTTGCTAAACATGACTTCTTTAAGTTTAGAATAGACG | 13750 |
| gb:MT007544 | Organism:Severe | ATTTACTTAAGGATTGTCCAGCTGTTGCTAAACATGACTTCTTTAAGTTTAGAATAGACG | 13762 |
| gb:MN994467 | Organism:Severe | ATTTACTTAAGGATTGTCCAGCTGTTGCTAAACATGACTTCTTTAAGTTTAGAATAGACG | 13762 |
| gb:MT044257 | Organism:Severe | ATTTACTTAAGGATTGTCCAGCTGTTGCTAAACATGACTTCTTTAAGTTTAGAATAGACG | 13762 |
| gb:MT106054 | Organism:Severe | ATTTACTTAAGGATTGTCCAGCTGTTGCTAAACATGACTTCTTTAAGTTTAGAATAGACG | 13762 |
| gb:MT049951 | Organism:Severe | ATTTACTTAAGGATTGTCCAGCTGTTGCTAAACATGACTTCTTTAAGTTTAGAATAGACG | 13762 |
| gb:MN975262 | Organism:Severe | ATTTACTTAAGGATTGTCCAGCTGTTGCTAAACATGACTTCTTTAAGTTTAGAATAGACG | 13762 |
| gb:MT106052 | Organism:Severe | ATTTACTTAAGGATTGTCCAGCTGTTGCTAAACATGACTTCTTTAAGTTTAGAATAGACG | 13762 |
| gb:LC522975 | Organism:Severe | ATTTACTTAAGGATTGTCCAGCTGTTGCTAAACATGACTTCTTTAAGTTTAGAATAGACG | 13759 |
| gb:LC522973 | Organism:Severe | ATTTACTTAAGGATTGTCCAGCTGTTGCTAAACATGACTTCTTTAAGTTTAGAATAGACG | 13759 |
| gb:LC522974 | Organism:Severe | ATTTACTTAAGGATTGTCCAGCTGTTGCTAAACATGACTTCTTTAAGTTTAGAATAGACG | 13759 |
| gb:MN985325 | Organism:Severe | ATTTACTTAAGGATTGTCCAGCTGTTGCTAAACATGACTTCTTTAAGTTTAGAATAGACG | 13762 |
| gb:MT020881 | Organism:Severe | ATTTACTTAAGGATTGTCCAGCTGTTGCTAAACATGACTTCTTTAAGTTTAGAATAGACG | 13762 |
| gb:MT020880 | Organism:Severe | ATTTACTTAAGGATTGTCCAGCTGTTGCTAAACATGACTTCTTTAAGTTTAGAATAGACG | 13762 |
| gb:MT066175 | Organism:Severe | ATTTACTTAAGGATTGTCCAGCTGTTGCTAAACATGACTTCTTTAAGTTTAGAATAGACG | 13762 |
| gb:MN997409 | Organism:Severe | ATTTACTTAAGGATTGTCCAGCTGTTGCTAAACATGACTTCTTTAAGTTTAGAATAGACG | 13762 |
| gb:MN938384 | Organism:Severe | ATTTACTTAAGGATTGTCCAGCTGTTGCTAAACATGACTTCTTTAAGTTTAGAATAGACG | 13730 |
| gb:MT044258 | Organism:Severe | ATTTACTTAAGGATTGTCCAGCTGTTGCTAAACATGACTTCTTTAAGTTTAGAATAGACG | 13738 |
| gb:MT039890 | Organism:Severe | ATTTACTTAAGGATTGTCCAGCTGTTGCTAAACATGACTTCTTTAAGTTTAGAATAGACG | 13762 |
| gb:MN988713 | Organism:Severe | ATTTACTTAAGGATTGTCCAGCTGTTGCTAAACATGACTTCTTTAAGTTTAGAATAGACG | 13762 |
| gb:LC521925 | Organism:Severe | ATTTACTTAAGGATTGTCCAGCTGTTGCTAAACATGACTTCTTTAAGTTTAGAATAGACG | 13735 |
| gb:MT093571 | Organism:Severe | ATTTACTTAAGGATTGTCCAGCTGTTGCTAAACATGACTTCTTTAAGTTTAGAATAGACG | 13762 |
| gb:MT039887 | Organism:Severe | ATTTACTTAAGGATTGTCCAGCTGTTGCTAAACATGACTTCTTTAAGTTTAGAATAGACG | 13762 |
| gb:MT019530 | Organism:Severe | ATTTACTTAAGGATTGTCCAGCTGTTGCTAAACATGACTTCTTTAAGTTTAGAATAGACG | 13762 |
| gb:MT039888 | Organism:Severe | ATTTACTTAAGGATTGTCCAGCTGTTGCTAAACATGACTTCTTTAAGTTTAGAATAGACG | 13762 |
| gb:LC522972 | Organism:Severe | ATTTACTTAAGGATTGTCCAGCTGTTGCTAAACATGACTTCTTTAAGTTTAGAATAGACG | 13759 |
| gb:MT027063 | Organism:Severe | ATTTACTTAAGGATTGTCCAGCTGTTGCTAAACATGACTTCTTTAAGTTTAGAATAGACG | 13762 |
| gb:MT027062 | Organism:Severe | ATTTACTTAAGGATTGTCCAGCTGTTGCTAAACATGACTTCTTTAAGTTTAGAATAGACG | 13762 |
| gb:MT019529 | Organism:Severe | ATTTACTTAAGGATTGTCCAGCTGTTGCTAAACATGACTTCTTTAAGTTTAGAATAGACG | 13762 |
| gb:MN996529 | Organism:Severe | ATTTACTTAAGGATTGTCCAGCTGTTGCTAAACATGACTTCTTTAAGTTTAGAATAGACG | 13750 |
| gb:MN996531 | Organism:Severe | ATTTACTTAAGGATTGTCCAGCTGTTGCTAAACATGACTTCTTTAAGTTTAGAATAGACG | 13749 |
| gb:MT066176 | Organism:Severe | ATTTACTTAAGGATTGTCCAGCTGTTGCTAAACATGACTTCTTTAAGTTTAGAATAGACG | 13762 |
| gb:MT027064 | Organism:Severe | ATTTACTTAAGGATTGTCCAGCTGTTGCTAAACATGACTTCTTTAAGTTTAGAATAGACG | 13762 |
| gb:MN994468 | Organism:Severe | ATTTACTTAAGGATTGTCCAGCTGTTGCTAAACATGACTTCTTTAAGTTTAGAATAGACG | 13762 |
| gb:MT072688 | Organism:Severe | ATTTACTTAAGGATTGTCCAGCTGTTGCTAAACATGACTTCTTTAAGTTTAGAATAGACG | 13747 |
| gb:MN996527 | Organism:Severe | ATTTACTTAAGGATTGTCCAGCTGTTGCTAAACATGACTTCTTTAAGTTTAGAATAGACG | 13729 |
| gb:MT093631 | Organism:Severe | ATTTACTTAAGGATTGTCCAGCTGTTGCTAAACATGACTTCTTTAAGTTTAGAATAGACG | 13800 |
| gb:MT106053 | Organism:Severe | ATTTACTTAAGGATTGTCCAGCTGTTGCTAAACATGACTTCTTTAAGTTTAGAATAGACG | 13762 |
| gb:MT019533 | Organism:Severe | ATTTACTTAAGGATTGTCCAGCTGTTGCTAAACATGACTTCTTTAAGTTTAGAATAGACG | 13762 |
| gb:MT019531 | Organism:Severe | ATTTACTTAAGGATTGTCCAGCTGTTGCTAAACATGACTTCTTTAAGTTTAGAATAGACG | 13762 |
| gb:MN996528 | Organism:Severe | ATTTACTTAAGGATTGTCCAGCTGTTGCTAAACATGACTTCTTTAAGTTTAGAATAGACG | 13762 |
| gb:MN996530 | Organism:Severe | ATTTACTTAAGGATTGTCCAGCTGTTGCTAAACATGACTTCTTTAAGTTTAGAATAGACG | 13748 |
| gb:MN908947 | Organism:Severe | ATTTACTTAAGGATTGTCCAGCTGTTGCTAAACATGACTTCTTTAAGTTTAGAATAGACG | 13762 |
| gb:MT019532 | Organism:Severe | ATTTACTTAAGGATTGTCCAGCTGTTGCTAAACATGACTTCTTTAAGTTTAGAATAGACG | 13762 |

\*\*\*\*\*

|             |                 |                                                              |       |
|-------------|-----------------|--------------------------------------------------------------|-------|
| gb:MT020781 | Organism:Severe | GTGACATGGTACCACATATATCACGTCAACGTCTTACTAAATACACAATGGCAGACCTCG | 13810 |
| gb:MT007544 | Organism:Severe | GTGACATGGTACCACATATATCACGTCAACGTCTTACTAAATACACAATGGCAGACCTCG | 13822 |
| gb:MN994467 | Organism:Severe | GTGACATGGTACCACATATATCACGTCAACGTCTTACTAAATACACAATGGCAGACCTCG | 13822 |
| gb:MT044257 | Organism:Severe | GTGACATGGTACCACATATATCACGTCAACGTCTTACTAAATACACAATGGCAGACCTCG | 13822 |
| gb:MT106054 | Organism:Severe | GTGACATGGTACCACATATATCACGTCAACGTCTTACTAAATACACAATGGCAGACCTCG | 13822 |
| gb:MT049951 | Organism:Severe | GTGACATGGTACCACATATATCACGTCAACGTCTTACTAAATACACAATGGCAGACCTCG | 13822 |
| gb:MN975262 | Organism:Severe | GTGACATGGTACCACATATATCACGTCAACGTCTTACTAAATACACAATGGCAGACCTCG | 13822 |
| gb:MT106052 | Organism:Severe | GTGACATGGTACCACATATATCACGTCAACGTCTTACTAAATACACAATGGCAGACCTCG | 13822 |
| gb:LC522975 | Organism:Severe | GTGACATGGTACCACATATATCACGTCAACGTCTTACTAAATACACAATGGCAGACCTCG | 13819 |
| gb:LC522973 | Organism:Severe | GTGACATGGTACCACATATATCACGTCAACGTCTTACTAAATACACAATGGCAGACCTCG | 13819 |
| gb:LC522974 | Organism:Severe | GTGACATGGTACCACATATATCACGTCAACGTCTTACTAAATACACAATGGCAGACCTCG | 13819 |



|             |                 |                                                               |       |
|-------------|-----------------|---------------------------------------------------------------|-------|
| gb:MN996531 | Organism:Severe | TCTATGCTTTAAGGCATTTTGATGAAGGTAATTGTGACACATTA AAAAGAAACTTTGTCA | 13869 |
| gb:MT066176 | Organism:Severe | TCTATGCTTTAAGGCATTTTGATGAAGGTAATTGTGACACATTA AAAAGAAACTTTGTCA | 13882 |
| gb:MT027064 | Organism:Severe | TCTATGCTTTAAGGCATTTTGATGAAGGTAATTGTGACACATTA AAAAGAAACTTTGTCA | 13882 |
| gb:MN994468 | Organism:Severe | TCTATGCTTTAAGGCATTTTGATGAAGGTAATTGTGACACATTA AAAAGAAACTTTGTCA | 13882 |
| gb:MT072688 | Organism:Severe | TCTATGCTTTAAGGCATTTTGATGAAGGTAATTGTGACACATTA AAAAGAAACTTTGTCA | 13867 |
| gb:MN996527 | Organism:Severe | TCTATGCTTTAAGGCATTTTGATGAAGGTAATTGTGACACATTA AAAAGAAACTTTGTCA | 13849 |
| gb:MT093631 | Organism:Severe | TCTATGCTTTAAGGCATTTTGATGAAGGTAATTGTGACACATTA AAAAGAAACTTTGTCA | 13920 |
| gb:MT106053 | Organism:Severe | TCTATGCTTTAAGGCATTTTGATGAAGGTAATTGTGACACATTA AAAAGAAACTTTGTCA | 13882 |
| gb:MT019533 | Organism:Severe | TCTATGCTTTAAGGCATTTTGATGAAGGTAATTGTGACACATTA AAAAGAAACTTTGTCA | 13882 |
| gb:MT019531 | Organism:Severe | TCTATGCTTTAAGGCATTTTGATGAAGGTAATTGTGACACATTA AAAAGAAACTTTGTCA | 13882 |
| gb:MN996528 | Organism:Severe | TCTATGCTTTAAGGCATTTTGATGAAGGTAATTGTGACACATTA AAAAGAAACTTTGTCA | 13882 |
| gb:MN996530 | Organism:Severe | TCTATGCTTTAAGGCATTTTGATGAAGGTAATTGTGACACATTA AAAAGAAACTTTGTCA | 13868 |
| gb:MN908947 | Organism:Severe | TCTATGCTTTAAGGCATTTTGATGAAGGTAATTGTGACACATTA AAAAGAAACTTTGTCA | 13882 |
| gb:MT019532 | Organism:Severe | TCTATGCTTTAAGGCATTTTGATGAAGGTAATTGTGACACATTA AAAAGAAACTTTGTCA | 13882 |

\*\*\*\*\*

|             |                 |                                                               |       |
|-------------|-----------------|---------------------------------------------------------------|-------|
| gb:MT020781 | Organism:Severe | CATACAATTGTTGTGATGATGATTATTTCAATAAAAAAGGACTGGTATGATTTTGTAGAAA | 13930 |
| gb:MT007544 | Organism:Severe | CATACAATTGTTGTGATGATGATTATTTCAATAAAAAAGGACTGGTATGATTTTGTAGAAA | 13942 |
| gb:MN994467 | Organism:Severe | CATACAATTGTTGTGATGATGATTATTTCAATAAAAAAGGACTGGTATGATTTTGTAGAAA | 13942 |
| gb:MT044257 | Organism:Severe | CATACAATTGTTGTGATGATGATTATTTCAATAAAAAAGGACTGGTATGATTTTGTAGAAA | 13942 |
| gb:MT106054 | Organism:Severe | CATACAATTGTTGTGATGATGATTATTTCAATAAAAAAGGACTGGTATGATTTTGTAGAAA | 13942 |
| gb:MT049951 | Organism:Severe | CATACAATTGTTGTGATGATGATTATTTCAATAAAAAAGGACTGGTATGATTTTGTAGAAA | 13942 |
| gb:MN975262 | Organism:Severe | CATACAATTGTTGTGATGATGATTATTTCAATAAAAAAGGACTGGTATGATTTTGTAGAAA | 13942 |
| gb:MT106052 | Organism:Severe | CATACAATTGTTGTGATGATGATTATTTCAATAAAAAAGGACTGGTATGATTTTGTAGAAA | 13942 |
| gb:LC522975 | Organism:Severe | CATACAATTGTTGTGATGATGATTATTTCAATAAAAAAGGACTGGTATGATTTTGTAGAAA | 13939 |
| gb:LC522973 | Organism:Severe | CATACAATTGTTGTGATGATGATTATTTCAATAAAAAAGGACTGGTATGATTTTGTAGAAA | 13939 |
| gb:LC522974 | Organism:Severe | CATACAATTGTTGTGATGATGATTATTTCAATAAAAAAGGACTGGTATGATTTTGTAGAAA | 13939 |
| gb:MN985325 | Organism:Severe | CATACAATTGTTGTGATGATGATTATTTCAATAAAAAAGGACTGGTATGATTTTGTAGAAA | 13942 |
| gb:MT020881 | Organism:Severe | CATACAATTGTTGTGATGATGATTATTTCAATAAAAAAGGACTGGTATGATTTTGTAGAAA | 13942 |
| gb:MT020880 | Organism:Severe | CATACAATTGTTGTGATGATGATTATTTCAATAAAAAAGGACTGGTATGATTTTGTAGAAA | 13942 |
| gb:MT066175 | Organism:Severe | CATACAATTGTTGTGATGATGATTATTTCAATAAAAAAGGACTGGTATGATTTTGTAGAAA | 13942 |
| gb:MN997409 | Organism:Severe | CATACAATTGTTGTGATGATGATTATTTCAATAAAAAAGGACTGGTATGATTTTGTAGAAA | 13942 |
| gb:MN938384 | Organism:Severe | CATACAATTGTTGTGATGATGATTATTTCAATAAAAAAGGACTGGTATGATTTTGTAGAAA | 13910 |
| gb:MT044258 | Organism:Severe | CATACAATTGTTGTGATGATGATTATTTCAATAAAAAAGGACTGGTATGATTTTGTAGAAA | 13918 |
| gb:MT039890 | Organism:Severe | CATACAATTGTTGTGATGATGATTATTTCAATAAAAAAGGACTGGTATGATTTTGTAGAAA | 13942 |
| gb:MN988713 | Organism:Severe | CATACAATTGTTGTGATGATGATTATTTCAATAAAAAAGGACTGGTATGATTTTGTAGAAA | 13942 |
| gb:LC521925 | Organism:Severe | CATACAATTGTTGTGATGATGATTATTTCAATAAAAAAGGACTGGTATGATTTTGTAGAAA | 13915 |
| gb:MT093571 | Organism:Severe | CATACAATTGTTGTGATGATGATTATTTCAATAAAAAAGGACTGGTATGATTTTGTAGAAA | 13942 |
| gb:MT039887 | Organism:Severe | CATACAATTGTTGTGATGATGATTATTTCAATAAAAAAGGACTGGTATGATTTTGTAGAAA | 13942 |
| gb:MT019530 | Organism:Severe | CATACAATTGTTGTGATGATGATTATTTCAATAAAAAAGGACTGGTATGATTTTGTAGAAA | 13942 |
| gb:MT039888 | Organism:Severe | CATACAATTGTTGTGATGATGATTATTTCAATAAAAAAGGACTGGTATGATTTTGTAGAAA | 13942 |
| gb:LC522972 | Organism:Severe | CATACAATTGTTGTGATGATGATTATTTCAATAAAAAAGGACTGGTATGATTTTGTAGAAA | 13939 |
| gb:MT027063 | Organism:Severe | CATACAATTGTTGTGATGATGATTATTTCAATAAAAAAGGACTGGTATGATTTTGTAGAAA | 13942 |
| gb:MT027062 | Organism:Severe | CATACAATTGTTGTGATGATGATTATTTCAATAAAAAAGGACTGGTATGATTTTGTAGAAA | 13942 |
| gb:MT019529 | Organism:Severe | CATACAATTGTTGTGATGATGATTATTTCAATAAAAAAGGACTGGTATGATTTTGTAGAAA | 13942 |
| gb:MN996529 | Organism:Severe | CATACAATTGTTGTGATGATGATTATTTCAATAAAAAAGGACTGGTATGATTTTGTAGAAA | 13930 |
| gb:MN996531 | Organism:Severe | CATACAATTGTTGTGATGATGATTATTTCAATAAAAAAGGACTGGTATGATTTTGTAGAAA | 13929 |
| gb:MT066176 | Organism:Severe | CATACAATTGTTGTGATGATGATTATTTCAATAAAAAAGGACTGGTATGATTTTGTAGAAA | 13942 |
| gb:MT027064 | Organism:Severe | CATACAATTGTTGTGATGATGATTATTTCAATAAAAAAGGACTGGTATGATTTTGTAGAAA | 13942 |
| gb:MN994468 | Organism:Severe | CATACAATTGTTGTGATGATGATTATTTCAATAAAAAAGGACTGGTATGATTTTGTAGAAA | 13942 |
| gb:MT072688 | Organism:Severe | CATACAATTGTTGTGATGATGATTATTTCAATAAAAAAGGACTGGTATGATTTTGTAGAAA | 13927 |
| gb:MN996527 | Organism:Severe | CATACAATTGTTGTGATGATGATTATTTCAATAAAAAAGGACTGGTATGATTTTGTAGAAA | 13909 |
| gb:MT093631 | Organism:Severe | CATACAATTGTTGTGATGATGATTATTTCAATAAAAAAGGACTGGTATGATTTTGTAGAAA | 13980 |
| gb:MT106053 | Organism:Severe | CATACAATTGTTGTGATGATGATTATTTCAATAAAAAAGGACTGGTATGATTTTGTAGAAA | 13942 |
| gb:MT019533 | Organism:Severe | CATACAATTGTTGTGATGATGATTATTTCAATAAAAAAGGACTGGTATGATTTTGTAGAAA | 13942 |
| gb:MT019531 | Organism:Severe | CATACAATTGTTGTGATGATGATTATTTCAATAAAAAAGGACTGGTATGATTTTGTAGAAA | 13942 |
| gb:MN996528 | Organism:Severe | CATACAATTGTTGTGATGATGATTATTTCAATAAAAAAGGACTGGTATGATTTTGTAGAAA | 13942 |
| gb:MN996530 | Organism:Severe | CATACAATTGTTGTGATGATGATTATTTCAATAAAAAAGGACTGGTATGATTTTGTAGAAA | 13928 |
| gb:MN908947 | Organism:Severe | CATACAATTGTTGTGATGATGATTATTTCAATAAAAAAGGACTGGTATGATTTTGTAGAAA | 13942 |
| gb:MT019532 | Organism:Severe | CATACAATTGTTGTGATGATGATTATTTCAATAAAAAAGGACTGGTATGATTTTGTAGAAA | 13942 |

\*\*\*\*\*

|             |                 |                                                               |       |
|-------------|-----------------|---------------------------------------------------------------|-------|
| gb:MT020781 | Organism:Severe | ACCCAGATATATTACGCGTATACGCCAAGCTTAGGTGAACGTGTACGCCAAGCTTTGTTAA | 13990 |
| gb:MT007544 | Organism:Severe | ACCCAGATATATTACGCGTATACGCCAAGCTTAGGTGAACGTGTACGCCAAGCTTTGTTAA | 14002 |
| gb:MN994467 | Organism:Severe | ACCCAGATATATTACGCGTATACGCCAAGCTTAGGTGAACGTGTACGCCAAGCTTTGTTAA | 14002 |







|             |                  |                                                                       |       |
|-------------|------------------|-----------------------------------------------------------------------|-------|
| gb:MN996530 | Organism: Severe | ATAATCAAGATCTCAATGGTAACTGGTATGATTTGCGTGATTTCATACAAACCACGCCAG          | 14108 |
| gb:MN908947 | Organism: Severe | ATAATCAAGATCTCAATGGTAACTGGTATGATTTGCGTGATTTCATACAAACCACGCCAG          | 14122 |
| gb:MT019532 | Organism: Severe | ATAATCAAGATCTCAATGGTAACTGGTATGATTTGCGTGATTTCATACAAACCACGCCAG<br>***** | 14122 |
| gb:MT020781 | Organism: Severe | GTAGTGGAGTTTCTGTTGTAGATTCTTATTATTCATTGTTAATGCCTATATTAACCTTGA          | 14170 |
| gb:MT007544 | Organism: Severe | GTAGTGGAGTTTCTGTTGTAGATTCTTATTATTCATTGTTAATGCCTATATTAACCTTGA          | 14182 |
| gb:MN994467 | Organism: Severe | GTAGTGGAGTTTCTGTTGTAGATTCTTATTATTCATTGTTAATGCCTATATTAACCTTGA          | 14182 |
| gb:MT044257 | Organism: Severe | GTAGTGGAGTTTCTGTTGTAGATTCTTATTATTCATTGTTAATGCCTATATTAACCTTGA          | 14182 |
| gb:MT106054 | Organism: Severe | GTAGTGGAGTTTCTGTTGTAGATTCTTATTATTCATTGTTAATGCCTATATTAACCTTGA          | 14182 |
| gb:MT049951 | Organism: Severe | GTAGTGGAGTTTCTGTTGTAGATTCTTATTATTCATTGTTAATGCCTATATTAACCTTGA          | 14182 |
| gb:MN975262 | Organism: Severe | GTAGTGGAGTTTCTGTTGTAGATTCTTATTATTCATTGTTAATGCCTATATTAACCTTGA          | 14182 |
| gb:MT106052 | Organism: Severe | GTAGTGGAGTTTCTGTTGTAGATTCTTATTATTCATTGTTAATGCCTATATTAACCTTGA          | 14182 |
| gb:LC522975 | Organism: Severe | GTAGTGGAGTTTCTGTTGTAGATTCTTATTATTCATTGTTAATGCCTATATTAACCTTGA          | 14179 |
| gb:LC522973 | Organism: Severe | GTAGTGGAGTTTCTGTTGTAGATTCTTATTATTCATTGTTAATGCCTATATTAACCTTGA          | 14179 |
| gb:LC522974 | Organism: Severe | GTAGTGGAGTTTCTGTTGTAGATTCTTATTATTCATTGTTAATGCCTATATTAACCTTGA          | 14179 |
| gb:MN985325 | Organism: Severe | GTAGTGGAGTTTCTGTTGTAGATTCTTATTATTCATTGTTAATGCCTATATTAACCTTGA          | 14182 |
| gb:MT020881 | Organism: Severe | GTAGTGGAGTTTCTGTTGTAGATTCTTATTATTCATTGTTAATGCCTATATTAACCTTGA          | 14182 |
| gb:MT020880 | Organism: Severe | GTAGTGGAGTTTCTGTTGTAGATTCTTATTATTCATTGTTAATGCCTATATTAACCTTGA          | 14182 |
| gb:MT066175 | Organism: Severe | GTAGTGGAGTTTCTGTTGTAGATTCTTATTATTCATTGTTAATGCCTATATTAACCTTGA          | 14182 |
| gb:MN997409 | Organism: Severe | GTAGTGGAGTTTCTGTTGTAGATTCTTATTATTCATTGTTAATGCCTATATTAACCTTGA          | 14182 |
| gb:MN938384 | Organism: Severe | GTAGTGGAGTTTCTGTTGTAGATTCTTATTATTCATTGTTAATGCCTATATTAACCTTGA          | 14150 |
| gb:MT044258 | Organism: Severe | GTAGTGGAGTTTCTGTTGTAGATTCTTATTATTCATTGTTAATGCCTATATTAACCTTGA          | 14158 |
| gb:MT039890 | Organism: Severe | GTAGTGGAGTTTCTGTTGTAGATTCTTATTATTCATTGTTAATGCCTATATTAACCTTGA          | 14182 |
| gb:MN988713 | Organism: Severe | GTAGTGGAGTTTCTGTTGTAGATTCTTATTATTCATTGTTAATGCCTATATTAACCTTGA          | 14182 |
| gb:LC521925 | Organism: Severe | GTAGTGGAGTTTCTGTTGTAGATTCTTATTATTCATTGTTAATGCCTATATTAACCTTGA          | 14155 |
| gb:MT093571 | Organism: Severe | GTAGTGGAGTTTCTGTTGTAGATTCTTATTATTCATTGTTAATGCCTATATTAACCTTGA          | 14182 |
| gb:MT039887 | Organism: Severe | GTAGTGGAGTTTCTGTTGTAGATTCTTATTATTCATTGTTAATGCCTATATTAACCTTGA          | 14182 |
| gb:MT019530 | Organism: Severe | GTAGTGGAGTTTCTGTTGTAGATTCTTATTATTCATTGTTAATGCCTATATTAACCTTGA          | 14182 |
| gb:MT039888 | Organism: Severe | GTAGTGGAGTTTCTGTTGTAGATTCTTATTATTCATTGTTAATGCCTATATTAACCTTGA          | 14182 |
| gb:LC522972 | Organism: Severe | GTAGTGGAGTTTCTGTTGTAGATTCTTATTATTCATTGTTAATGCCTATATTAACCTTGA          | 14179 |
| gb:MT027063 | Organism: Severe | GTAGTGGAGTTTCTGTTGTAGATTCTTATTATTCATTGTTAATGCCTATATTAACCTTGA          | 14182 |
| gb:MT027062 | Organism: Severe | GTAGTGGAGTTTCTGTTGTAGATTCTTATTATTCATTGTTAATGCCTATATTAACCTTGA          | 14182 |
| gb:MT019529 | Organism: Severe | GTAGTGGAGTTTCTGTTGTAGATTCTTATTATTCATTGTTAATGCCTATATTAACCTTGA          | 14182 |
| gb:MN996529 | Organism: Severe | GTAGTGGAGTTTCTGTTGTAGATTCTTATTATTCATTGTTAATGCCTATATTAACCTTGA          | 14170 |
| gb:MN996531 | Organism: Severe | GTAGTGGAGTTTCTGTTGTAGATTCTTATTATTCATTGTTAATGCCTATATTAACCTTGA          | 14169 |
| gb:MT066176 | Organism: Severe | GTAGTGGAGTTTCTGTTGTAGATTCTTATTATTCATTGTTAATGCCTATATTAACCTTGA          | 14182 |
| gb:MT027064 | Organism: Severe | GTAGTGGAGTTTCTGTTGTAGATTCTTATTATTCATTGTTAATGCCTATATTAACCTTGA          | 14182 |
| gb:MN994468 | Organism: Severe | GTAGTGGAGTTTCTGTTGTAGATTCTTATTATTCATTGTTAATGCCTATATTAACCTTGA          | 14182 |
| gb:MT072688 | Organism: Severe | GTAGTGGAGTTTCTGTTGTAGATTCTTATTATTCATTGTTAATGCCTATATTAACCTTGA          | 14167 |
| gb:MN996527 | Organism: Severe | GTAGTGGAGTTTCTGTTGTAGATTCTTATTATTCATTGTTAATGCCTATATTAACCTTGA          | 14149 |
| gb:MT093631 | Organism: Severe | GTAGTGGAGTTTCTGTTGTAGATTCTTATTATTCATTGTTAATGCCTATATTAACCTTGA          | 14220 |
| gb:MT106053 | Organism: Severe | GTAGTGGAGTTTCTGTTGTAGATTCTTATTATTCATTGTTAATGCCTATATTAACCTTGA          | 14182 |
| gb:MT019533 | Organism: Severe | GTAGTGGAGTTTCTGTTGTAGATTCTTATTATTCATTGTTAATGCCTATATTAACCTTGA          | 14182 |
| gb:MT019531 | Organism: Severe | GTAGTGGAGTTTCTGTTGTAGATTCTTATTATTCATTGTTAATGCCTATATTAACCTTGA          | 14182 |
| gb:MN996528 | Organism: Severe | GTAGTGGAGTTTCTGTTGTAGATTCTTATTATTCATTGTTAATGCCTATATTAACCTTGA          | 14182 |
| gb:MN996530 | Organism: Severe | GTAGTGGAGTTTCTGTTGTAGATTCTTATTATTCATTGTTAATGCCTATATTAACCTTGA          | 14168 |
| gb:MN908947 | Organism: Severe | GTAGTGGAGTTTCTGTTGTAGATTCTTATTATTCATTGTTAATGCCTATATTAACCTTGA          | 14182 |
| gb:MT019532 | Organism: Severe | GTAGTGGAGTTTCTGTTGTAGATTCTTATTATTCATTGTTAATGCCTATATTAACCTTGA<br>***** | 14182 |

|             |                  |                                                              |       |
|-------------|------------------|--------------------------------------------------------------|-------|
| gb:MT020781 | Organism: Severe | CCAGGGCTTTAACTGCAGAGTCACATGTTGACACTGACTTAACAAAGCCTTACATTAAGT | 14230 |
| gb:MT007544 | Organism: Severe | CCAGGGCTTTAACTGCAGAGTCACATGTTGACACTGACTTAACAAAGCCTTACATTAAGT | 14242 |
| gb:MN994467 | Organism: Severe | CCAGGGCTTTAACTGCAGAGTCACATGTTGACACTGACTTAACAAAGCCTTACATTAAGT | 14242 |
| gb:MT044257 | Organism: Severe | CCAGGGCTTTAACTGCAGAGTCACATGTTGACACTGACTTAACAAAGCCTTACATTAAGT | 14242 |
| gb:MT106054 | Organism: Severe | CCAGGGCTTTAACTGCAGAGTCACATGTTGACACTGACTTAACAAAGCCTTACATTAAGT | 14242 |
| gb:MT049951 | Organism: Severe | CCAGGGCTTTAACTGCAGAGTCACATGTTGACACTGACTTAACAAAGCCTTACATTAAGT | 14242 |
| gb:MN975262 | Organism: Severe | CCAGGGCTTTAACTGCAGAGTCACATGTTGACACTGACTTAACAAAGCCTTACATTAAGT | 14242 |
| gb:MT106052 | Organism: Severe | CCAGGGCTTTAACTGCAGAGTCACATGTTGACACTGACTTAACAAAGCCTTACATTAAGT | 14242 |
| gb:LC522975 | Organism: Severe | CCAGGGCTTTAACTGCAGAGTCACATGTTGACACTGACTTAACAAAGCCTTACATTAAGT | 14239 |
| gb:LC522973 | Organism: Severe | CCAGGGCTTTAACTGCAGAGTCACATGTTGACACTGACTTAACAAAGCCTTACATTAAGT | 14239 |
| gb:LC522974 | Organism: Severe | CCAGGGCTTTAACTGCAGAGTCACATGTTGACACTGACTTAACAAAGCCTTACATTAAGT | 14239 |
| gb:MN985325 | Organism: Severe | CCAGGGCTTTAACTGCAGAGTCACATGTTGACACTGACTTAACAAAGCCTTACATTAAGT | 14242 |
| gb:MT020881 | Organism: Severe | CCAGGGCTTTAACTGCAGAGTCACATGTTGACACTGACTTAACAAAGCCTTACATTAAGT | 14242 |
| gb:MT020880 | Organism: Severe | CCAGGGCTTTAACTGCAGAGTCACATGTTGACACTGACTTAACAAAGCCTTACATTAAGT | 14242 |

|             |                 |                                                              |       |
|-------------|-----------------|--------------------------------------------------------------|-------|
| gb:MT066175 | Organism:Severe | CCAGGGCTTTAACTGCAGAGTCACATGTTGACACTGACTTAACAAAGCCTTACATTAAGT | 14242 |
| gb:MN997409 | Organism:Severe | CCAGGGCTTTAACTGCAGAGTCACATGTTGACACTGACTTAACAAAGCCTTACATTAAGT | 14242 |
| gb:MN938384 | Organism:Severe | CCAGGGCTTTAACTGCAGAGTCACATGTTGACACTGACTTAACAAAGCCTTACATTAAGT | 14210 |
| gb:MT044258 | Organism:Severe | CCAGGGCTTTAACTGCAGAGTCACATGTTGACACTGACTTAACAAAGCCTTACATTAAGT | 14218 |
| gb:MT039890 | Organism:Severe | CCAGGGCTTTAACTGCAGAGTCACATGTTGACACTGACTTAACAAAGCCTTACATTAAGT | 14242 |
| gb:MN988713 | Organism:Severe | CCAGGGCTTTAACTGCAGAGTCACATGTTGACACTGACTTAACAAAGCCTTACATTAAGT | 14242 |
| gb:LC521925 | Organism:Severe | CCAGGGCTTTAACTGCAGAGTCACATGTTGACACTGACTTAACAAAGCCTTACATTAAGT | 14215 |
| gb:MT093571 | Organism:Severe | CCAGGGCTTTAACTGCAGAGTCACATGTTGACACTGACTTAACAAAGCCTTACATTAAGT | 14242 |
| gb:MT039887 | Organism:Severe | CCAGGGCTTTAACTGCAGAGTCACATGTTGACACTGACTTAACAAAGCCTTACATTAAGT | 14242 |
| gb:MT019530 | Organism:Severe | CCAGGGCTTTAACTGCAGAGTCACATGTTGACACTGACTTAACAAAGCCTTACATTAAGT | 14242 |
| gb:MT039888 | Organism:Severe | CCAGGGCTTTAACTGCAGAGTCACATGTTGACACTGACTTAACAAAGCCTTACATTAAGT | 14242 |
| gb:LC522972 | Organism:Severe | CCAGGGCTTTAACTGCAGAGTCACATGTTGACACTGACTTAACAAAGCCTTACATTAAGT | 14239 |
| gb:MT027063 | Organism:Severe | CCAGGGCTTTAACTGCAGAGTCACATGTTGACACTGACTTAACAAAGCCTTACATTAAGT | 14242 |
| gb:MT027062 | Organism:Severe | CCAGGGCTTTAACTGCAGAGTCACATGTTGACACTGACTTAACAAAGCCTTACATTAAGT | 14242 |
| gb:MT019529 | Organism:Severe | CCAGGGCTTTAACTGCAGAGTCACATGTTGACACTGACTTAACAAAGCCTTACATTAAGT | 14242 |
| gb:MN996529 | Organism:Severe | CCAGGGCTTTAACTGCAGAGTCACATGTTGACACTGACTTAACAAAGCCTTACATTAAGT | 14230 |
| gb:MN996531 | Organism:Severe | CCAGGGCTTTAACTGCAGAGTCACATGTTGACACTGACTTAACAAAGCCTTACATTAAGT | 14229 |
| gb:MT066176 | Organism:Severe | CCAGGGCTTTAACTGCAGAGTCACATGTTGACACTGACTTAACAAAGCCTTACATTAAGT | 14242 |
| gb:MT027064 | Organism:Severe | CCAGGGCTTTAACTGCAGAGTCACATGTTGACACTGACTTAACAAAGCCTTACATTAAGT | 14242 |
| gb:MN994468 | Organism:Severe | CCAGGGCTTTAACTGCAGAGTCACATGTTGACACTGACTTAACAAAGCCTTACATTAAGT | 14242 |
| gb:MT072688 | Organism:Severe | CCAGGGCTTTAACTGCAGAGTCACATGTTGACACTGACTTAACAAAGCCTTACATTAAGT | 14227 |
| gb:MN996527 | Organism:Severe | CCAGGGCTTTAACTGCAGAGTCACATGTTGACACTGACTTAACAAAGCCTTACATTAAGT | 14209 |
| gb:MT093631 | Organism:Severe | CCAGGGCTTTAACTGCAGAGTCACATGTTGACACTGACTTAACAAAGCCTTACATTAAGT | 14280 |
| gb:MT106053 | Organism:Severe | CCAGGGCTTTAACTGCAGAGTCACATGTTGACACTGACTTAACAAAGCCTTACATTAAGT | 14242 |
| gb:MT019533 | Organism:Severe | CCAGGGCTTTAACTGCAGAGTCACATGTTGACACTGACTTAACAAAGCCTTACATTAAGT | 14242 |
| gb:MT019531 | Organism:Severe | CCAGGGCTTTAACTGCAGAGTCACATGTTGACACTGACTTAACAAAGCCTTACATTAAGT | 14242 |
| gb:MN996528 | Organism:Severe | CCAGGGCTTTAACTGCAGAGTCACATGTTGACACTGACTTAACAAAGCCTTACATTAAGT | 14242 |
| gb:MN996530 | Organism:Severe | CCAGGGCTTTAACTGCAGAGTCACATGTTGACACTGACTTAACAAAGCCTTACATTAAGT | 14228 |
| gb:MN908947 | Organism:Severe | CCAGGGCTTTAACTGCAGAGTCACATGTTGACACTGACTTAACAAAGCCTTACATTAAGT | 14242 |
| gb:MT019532 | Organism:Severe | CCAGGGCTTTAACTGCAGAGTCACATGTTGACACTGACTTAACAAAGCCTTACATTAAGT | 14242 |

\*\*\*\*\*

|             |                 |                                                             |       |
|-------------|-----------------|-------------------------------------------------------------|-------|
| gb:MT020781 | Organism:Severe | GGGATTTGTTAAAATATGACTTCACGGAAGAGAGGTTAAAACCTTTGACCGTTATTTTA | 14290 |
| gb:MT007544 | Organism:Severe | GGGATTTGTTAAAATATGACTTCACGGAAGAGAGGTTAAAACCTTTGACCGTTATTTTA | 14302 |
| gb:MN994467 | Organism:Severe | GGGATTTGTTAAAATATGACTTCACGGAAGAGAGGTTAAAACCTTTGACCGTTATTTTA | 14302 |
| gb:MT044257 | Organism:Severe | GGGATTTGTTAAAATATGACTTCACGGAAGAGAGGTTAAAACCTTTGACCGTTATTTTA | 14302 |
| gb:MT106054 | Organism:Severe | GGGATTTGTTAAAATATGACTTCACGGAAGAGAGGTTAAAACCTTTGACCGTTATTTTA | 14302 |
| gb:MT049951 | Organism:Severe | GGGATTTGTTAAAATATGACTTCACGGAAGAGAGGTTAAAACCTTTGACCGTTATTTTA | 14302 |
| gb:MN975262 | Organism:Severe | GGGATTTGTTAAAATATGACTTCACGGAAGAGAGGTTAAAACCTTTGACCGTTATTTTA | 14302 |
| gb:MT106052 | Organism:Severe | GGGATTTGTTAAAATATGACTTCACGGAAGAGAGGTTAAAACCTTTGACCGTTATTTTA | 14302 |
| gb:LC522975 | Organism:Severe | GGGATTTGTTAAAATATGACTTCACGGAAGAGAGGTTAAAACCTTTGACCGTTATTTTA | 14299 |
| gb:LC522973 | Organism:Severe | GGGATTTGTTAAAATATGACTTCACGGAAGAGAGGTTAAAACCTTTGACCGTTATTTTA | 14299 |
| gb:LC522974 | Organism:Severe | GGGATTTGTTAAAATATGACTTCACGGAAGAGAGGTTAAAACCTTTGACCGTTATTTTA | 14299 |
| gb:MN985325 | Organism:Severe | GGGATTTGTTAAAATATGACTTCACGGAAGAGAGGTTAAAACCTTTGACCGTTATTTTA | 14302 |
| gb:MT020881 | Organism:Severe | GGGATTTGTTAAAATATGACTTCACGGAAGAGAGGTTAAAACCTTTGACCGTTATTTTA | 14302 |
| gb:MT020880 | Organism:Severe | GGGATTTGTTAAAATATGACTTCACGGAAGAGAGGTTAAAACCTTTGACCGTTATTTTA | 14302 |
| gb:MT066175 | Organism:Severe | GGGATTTGTTAAAATATGACTTCACGGAAGAGAGGTTAAAACCTTTGACCGTTATTTTA | 14302 |
| gb:MN997409 | Organism:Severe | GGGATTTGTTAAAATATGACTTCACGGAAGAGAGGTTAAAACCTTTGACCGTTATTTTA | 14302 |
| gb:MN938384 | Organism:Severe | GGGATTTGTTAAAATATGACTTCACGGAAGAGAGGTTAAAACCTTTGACCGTTATTTTA | 14270 |
| gb:MT044258 | Organism:Severe | GGGATTTGTTAAAATATGACTTCACGGAAGAGAGGTTAAAACCTTTGACCGTTATTTTA | 14278 |
| gb:MT039890 | Organism:Severe | GGGATTTGTTAAAATATGACTTCACGGAAGAGAGGTTAAAACCTTTGACCGTTATTTTA | 14302 |
| gb:MN988713 | Organism:Severe | GGGATTTGTTAAAATATGACTTCACGGAAGAGAGGTTAAAACCTTTGACCGTTATTTTA | 14302 |
| gb:LC521925 | Organism:Severe | GGGATTTGTTAAAATATGACTTCACGGAAGAGAGGTTAAAACCTTTGACCGTTATTTTA | 14275 |
| gb:MT093571 | Organism:Severe | GGGATTTGTTAAAATATGACTTCACGGAAGAGAGGTTAAAACCTTTGACCGTTATTTTA | 14302 |
| gb:MT039887 | Organism:Severe | GGGATTTGTTAAAATATGACTTCACGGAAGAGAGGTTAAAACCTTTGACCGTTATTTTA | 14302 |
| gb:MT019530 | Organism:Severe | GGGATTTGTTAAAATATGACTTCACGGAAGAGAGGTTAAAACCTTTGACCGTTATTTTA | 14302 |
| gb:MT039888 | Organism:Severe | GGGATTTGTTAAAATATGACTTCACGGAAGAGAGGTTAAAACCTTTGACCGTTATTTTA | 14302 |
| gb:LC522972 | Organism:Severe | GGGATTTGTTAAAATATGACTTCACGGAAGAGAGGTTAAAACCTTTGACCGTTATTTTA | 14299 |
| gb:MT027063 | Organism:Severe | GGGATTTGTTAAAATATGACTTCACGGAAGAGAGGTTAAAACCTTTGACCGTTATTTTA | 14302 |
| gb:MT027062 | Organism:Severe | GGGATTTGTTAAAATATGACTTCACGGAAGAGAGGTTAAAACCTTTGACCGTTATTTTA | 14302 |
| gb:MT019529 | Organism:Severe | GGGATTTGTTAAAATATGACTTCACGGAAGAGAGGTTAAAACCTTTGACCGTTATTTTA | 14302 |
| gb:MN996529 | Organism:Severe | GGGATTTGTTAAAATATGACTTCACGGAAGAGAGGTTAAAACCTTTGACCGTTATTTTA | 14290 |
| gb:MN996531 | Organism:Severe | GGGATTTGTTAAAATATGACTTCACGGAAGAGAGGTTAAAACCTTTGACCGTTATTTTA | 14289 |
| gb:MT066176 | Organism:Severe | GGGATTTGTTAAAATATGACTTCACGGAAGAGAGGTTAAAACCTTTGACCGTTATTTTA | 14302 |
| gb:MT027064 | Organism:Severe | GGGATTTGTTAAAATATGACTTCACGGAAGAGAGGTTAAAACCTTTGACCGTTATTTTA | 14302 |

|             |                 |                                                             |       |
|-------------|-----------------|-------------------------------------------------------------|-------|
| gb:MN994468 | Organism:Severe | GGGATTTGTTAAAATATGACTTCACGGAAGAGAGGTTAAAACCTTTGACCGTTATTTTA | 14302 |
| gb:MT072688 | Organism:Severe | GGGATTTGTTAAAATATGACTTCACGGAAGAGAGGTTAAAACCTTTGACCGTTATTTTA | 14287 |
| gb:MN996527 | Organism:Severe | GGGATTTGTTAAAATATGACTTCACGGAAGAGAGGTTAAAACCTTTGACCGTTATTTTA | 14269 |
| gb:MT093631 | Organism:Severe | GGGATTTGTTAAAATATGACTTCACGGAAGAGAGGTTAAAACCTTTGACCGTTATTTTA | 14340 |
| gb:MT106053 | Organism:Severe | GGGATTTGTTAAAATATGACTTCACGGAAGAGAGGTTAAAACCTTTGACCGTTATTTTA | 14302 |
| gb:MT019533 | Organism:Severe | GGGATTTGTTAAAATATGACTTCACGGAAGAGAGGTTAAAACCTTTGACCGTTATTTTA | 14302 |
| gb:MT019531 | Organism:Severe | GGGATTTGTTAAAATATGACTTCACGGAAGAGAGGTTAAAACCTTTGACCGTTATTTTA | 14302 |
| gb:MN996528 | Organism:Severe | GGGATTTGTTAAAATATGACTTCACGGAAGAGAGGTTAAAACCTTTGACCGTTATTTTA | 14302 |
| gb:MN996530 | Organism:Severe | GGGATTTGTTAAAATATGACTTCACGGAAGAGAGGTTAAAACCTTTGACCGTTATTTTA | 14288 |
| gb:MN908947 | Organism:Severe | GGGATTTGTTAAAATATGACTTCACGGAAGAGAGGTTAAAACCTTTGACCGTTATTTTA | 14302 |
| gb:MT019532 | Organism:Severe | GGGATTTGTTAAAATATGACTTCACGGAAGAGAGGTTAAAACCTTTGACCGTTATTTTA | 14302 |

\*\*\*\*\*

|             |                 |                                                              |       |
|-------------|-----------------|--------------------------------------------------------------|-------|
| gb:MT020781 | Organism:Severe | AATATTGGGATCAGACATACCACCCAAATTGTGTTAACTGTTTGGATGACAGATGCATTC | 14350 |
| gb:MT007544 | Organism:Severe | AATATTGGGATCAGACATACCACCCAAATTGTGTTAACTGTTTGGATGACAGATGCATTC | 14362 |
| gb:MN994467 | Organism:Severe | AATATTGGGATCAGACATACCACCCAAATTGTGTTAACTGTTTGGATGACAGATGCATTC | 14362 |
| gb:MT044257 | Organism:Severe | AATATTGGGATCAGACATACCACCCAAATTGTGTTAACTGTTTGGATGACAGATGCATTC | 14362 |
| gb:MT106054 | Organism:Severe | AATATTGGGATCAGACATACCACCCAAATTGTGTTAACTGTTTGGATGACAGATGCATTC | 14362 |
| gb:MT049951 | Organism:Severe | AATATTGGGATCAGACATACCACCCAAATTGTGTTAACTGTTTGGATGACAGATGCATTC | 14362 |
| gb:MN975262 | Organism:Severe | AATATTGGGATCAGACATACCACCCAAATTGTGTTAACTGTTTGGATGACAGATGCATTC | 14362 |
| gb:MT106052 | Organism:Severe | AATATTGGGATCAGACATACCACCCAAATTGTGTTAACTGTTTGGATGACAGATGCATTC | 14362 |
| gb:LC522975 | Organism:Severe | AATATTGGGATCAGACATACCACCCAAATTGTGTTAACTGTTTGGATGACAGATGCATTC | 14359 |
| gb:LC522973 | Organism:Severe | AATATTGGGATCAGACATACCACCCAAATTGTGTTAACTGTTTGGATGACAGATGCATTC | 14359 |
| gb:LC522974 | Organism:Severe | AATATTGGGATCAGACATACCACCCAAATTGTGTTAACTGTTTGGATGACAGATGCATTC | 14359 |
| gb:MN985325 | Organism:Severe | AATATTGGGATCAGACATACCACCCAAATTGTGTTAACTGTTTGGATGACAGATGCATTC | 14362 |
| gb:MT020881 | Organism:Severe | AATATTGGGATCAGACATACCACCCAAATTGTGTTAACTGTTTGGATGACAGATGCATTC | 14362 |
| gb:MT020880 | Organism:Severe | AATATTGGGATCAGACATACCACCCAAATTGTGTTAACTGTTTGGATGACAGATGCATTC | 14362 |
| gb:MT066175 | Organism:Severe | AATATTGGGATCAGACATACCACCCAAATTGTGTTAACTGTTTGGATGACAGATGCATTC | 14362 |
| gb:MN997409 | Organism:Severe | AATATTGGGATCAGACATACCACCCAAATTGTGTTAACTGTTTGGATGACAGATGCATTC | 14362 |
| gb:MN938384 | Organism:Severe | AATATTGGGATCAGACATACCACCCAAATTGTGTTAACTGTTTGGATGACAGATGCATTC | 14330 |
| gb:MT044258 | Organism:Severe | AATATTGGGATCAGACATACCACCCAAATTGTGTTAACTGTTTGGATGACAGATGCATTC | 14338 |
| gb:MT039890 | Organism:Severe | AATATTGGGATCAGACATACCACCCAAATTGTGTTAACTGTTTGGATGACAGATGCATTC | 14362 |
| gb:MN988713 | Organism:Severe | AATATTGGGATCAGACATACCACCCAAATTGTGTTAACTGTTTGGATGACAGATGCATTC | 14362 |
| gb:LC521925 | Organism:Severe | AATATTGGGATCAGACATACCACCCAAATTGTGTTAACTGTTTGGATGACAGATGCATTC | 14335 |
| gb:MT093571 | Organism:Severe | AATATTGGGATCAGACATACCACCCAAATTGTGTTAACTGTTTGGATGACAGATGCATTC | 14362 |
| gb:MT039887 | Organism:Severe | AATATTGGGATCAGACATACCACCCAAATTGTGTTAACTGTTTGGATGACAGATGCATTC | 14362 |
| gb:MT019530 | Organism:Severe | AATATTGGGATCAGACATACCACCCAAATTGTGTTAACTGTTTGGATGACAGATGCATTC | 14362 |
| gb:MT039888 | Organism:Severe | AATATTGGGATCAGACATACCACCCAAATTGTGTTAACTGTTTGGATGACAGATGCATTC | 14362 |
| gb:LC522972 | Organism:Severe | AATATTGGGATCAGACATACCACCCAAATTGTGTTAACTGTTTGGATGACAGATGCATTC | 14359 |
| gb:MT027063 | Organism:Severe | AATATTGGGATCAGACATACCACCCAAATTGTGTTAACTGTTTGGATGACAGATGCATTC | 14362 |
| gb:MT027062 | Organism:Severe | AATATTGGGATCAGACATACCACCCAAATTGTGTTAACTGTTTGGATGACAGATGCATTC | 14362 |
| gb:MT019529 | Organism:Severe | AATATTGGGATCAGACATACCACCCAAATTGTGTTAACTGTTTGGATGACAGATGCATTC | 14362 |
| gb:MN996529 | Organism:Severe | AATATTGGGATCAGACATACCACCCAAATTGTGTTAACTGTTTGGATGACAGATGCATTC | 14350 |
| gb:MN996531 | Organism:Severe | AATATTGGGATCAGACATACCACCCAAATTGTGTTAACTGTTTGGATGACAGATGCATTC | 14349 |
| gb:MT066176 | Organism:Severe | AATATTGGGATCAGACATACCACCCAAATTGTGTTAACTGTTTGGATGACAGATGCATTC | 14362 |
| gb:MT027064 | Organism:Severe | AATATTGGGATCAGACATACCACCCAAATTGTGTTAACTGTTTGGATGACAGATGCATTC | 14362 |
| gb:MN994468 | Organism:Severe | AATATTGGGATCAGACATACCACCCAAATTGTGTTAACTGTTTGGATGACAGATGCATTC | 14362 |
| gb:MT072688 | Organism:Severe | AATATTGGGATCAGACATACCACCCAAATTGTGTTAACTGTTTGGATGACAGATGCATTC | 14347 |
| gb:MN996527 | Organism:Severe | AATATTGGGATCAGACATACCACCCAAATTGTGTTAACTGTTTGGATGACAGATGCATTC | 14329 |
| gb:MT093631 | Organism:Severe | AATATTGGGATCAGACATACCACCCAAATTGTGTTAACTGTTTGGATGACAGATGCATTC | 14400 |
| gb:MT106053 | Organism:Severe | AATATTGGGATCAGACATACCACCCAAATTGTGTTAACTGTTTGGATGACAGATGCATTC | 14362 |
| gb:MT019533 | Organism:Severe | AATATTGGGATCAGACATACCACCCAAATTGTGTTAACTGTTTGGATGACAGATGCATTC | 14362 |
| gb:MT019531 | Organism:Severe | AATATTGGGATCAGACATACCACCCAAATTGTGTTAACTGTTTGGATGACAGATGCATTC | 14362 |
| gb:MN996528 | Organism:Severe | AATATTGGGATCAGACATACCACCCAAATTGTGTTAACTGTTTGGATGACAGATGCATTC | 14362 |
| gb:MN996530 | Organism:Severe | AATATTGGGATCAGACATACCACCCAAATTGTGTTAACTGTTTGGATGACAGATGCATTC | 14348 |
| gb:MN908947 | Organism:Severe | AATATTGGGATCAGACATACCACCCAAATTGTGTTAACTGTTTGGATGACAGATGCATTC | 14362 |
| gb:MT019532 | Organism:Severe | AATATTGGGATCAGACATACCACCCAAATTGTGTTAACTGTTTGGATGACAGATGCATTC | 14362 |

\*\*\*\*\*

|             |                 |                                                             |       |
|-------------|-----------------|-------------------------------------------------------------|-------|
| gb:MT020781 | Organism:Severe | TGCATTGTGCAAACCTTAATGTTTTATTCTCTACAGTGTTCCCACTACAAGTTTTGGAC | 14410 |
| gb:MT007544 | Organism:Severe | TGCATTGTGCAAACCTTAATGTTTTATTCTCTACAGTGTTCCCACTACAAGTTTTGGAC | 14422 |
| gb:MN994467 | Organism:Severe | TGCATTGTGCAAACCTTAATGTTTTATTCTCTACAGTGTTCCCACTACAAGTTTTGGAC | 14422 |
| gb:MT044257 | Organism:Severe | TGCATTGTGCAAACCTTAATGTTTTATTCTCTACAGTGTTCCCACTACAAGTTTTGGAC | 14422 |
| gb:MT106054 | Organism:Severe | TGCATTGTGCAAACCTTAATGTTTTATTCTCTACAGTGTTCCCACTACAAGTTTTGGAC | 14422 |
| gb:MT049951 | Organism:Severe | TGCATTGTGCAAACCTTAATGTTTTATTCTCTACAGTGTTCCCACTACAAGTTTTGGAC | 14422 |

|             |                 |                                                           |       |
|-------------|-----------------|-----------------------------------------------------------|-------|
| gb:MN975262 | Organism:Severe | TGCATTGTCAAACCTTTAATGTTTTATTCTCTACAGTGTCCACCTACAAGTTTGGAC | 14422 |
| gb:MT106052 | Organism:Severe | TGCATTGTCAAACCTTTAATGTTTTATTCTCTACAGTGTCCACCTACAAGTTTGGAC | 14422 |
| gb:LC522975 | Organism:Severe | TGCATTGTCAAACCTTTAATGTTTTATTCTCTACAGTGTCCACCTACAAGTTTGGAC | 14419 |
| gb:LC522973 | Organism:Severe | TGCATTGTCAAACCTTTAATGTTTTATTCTCTACAGTGTCCACCTACAAGTTTGGAC | 14419 |
| gb:LC522974 | Organism:Severe | TGCATTGTCAAACCTTTAATGTTTTATTCTCTACAGTGTCCACCTACAAGTTTGGAC | 14419 |
| gb:MN985325 | Organism:Severe | TGCATTGTCAAACCTTTAATGTTTTATTCTCTACAGTGTCCACCTACAAGTTTGGAC | 14422 |
| gb:MT020881 | Organism:Severe | TGCATTGTCAAACCTTTAATGTTTTATTCTCTACAGTGTCCACCTACAAGTTTGGAC | 14422 |
| gb:MT020880 | Organism:Severe | TGCATTGTCAAACCTTTAATGTTTTATTCTCTACAGTGTCCACCTACAAGTTTGGAC | 14422 |
| gb:MT066175 | Organism:Severe | TGCATTGTCAAACCTTTAATGTTTTATTCTCTACAGTGTCCACCTACAAGTTTGGAC | 14422 |
| gb:MN997409 | Organism:Severe | TGCATTGTCAAACCTTTAATGTTTTATTCTCTACAGTGTCCACCTACAAGTTTGGAC | 14422 |
| gb:MN938384 | Organism:Severe | TGCATTGTCAAACCTTTAATGTTTTATTCTCTACAGTGTCCACCTACAAGTTTGGAC | 14390 |
| gb:MT044258 | Organism:Severe | TGCATTGTCAAACCTTTAATGTTTTATTCTCTACAGTGTCCACCTACAAGTTTGGAC | 14398 |
| gb:MT039890 | Organism:Severe | TGCATTGTCAAACCTTTAATGTTTTATTCTCTACAGTGTCCACCTACAAGTTTGGAC | 14422 |
| gb:MN988713 | Organism:Severe | TGCATTGTCAAACCTTTAATGTTTTATTCTCTACAGTGTCCACCTACAAGTTTGGAC | 14422 |
| gb:LC521925 | Organism:Severe | TGCATTGTCAAACCTTTAATGTTTTATTCTCTACAGTGTCCACCTACAAGTTTGGAC | 14395 |
| gb:MT093571 | Organism:Severe | TGCATTGTCAAACCTTTAATGTTTTATTCTCTACAGTGTCCACCTACAAGTTTGGAC | 14422 |
| gb:MT039887 | Organism:Severe | TGCATTGTCAAACCTTTAATGTTTTATTCTCTACAGTGTCCACCTACAAGTTTGGAC | 14422 |
| gb:MT019530 | Organism:Severe | TGCATTGTCAAACCTTTAATGTTTTATTCTCTACAGTGTCCACCTACAAGTTTGGAC | 14422 |
| gb:MT039888 | Organism:Severe | TGCATTGTCAAACCTTTAATGTTTTATTCTCTACAGTGTCCACCTACAAGTTTGGAC | 14422 |
| gb:LC522972 | Organism:Severe | TGCATTGTCAAACCTTTAATGTTTTATTCTCTACAGTGTCCACCTACAAGTTTGGAC | 14419 |
| gb:MT027063 | Organism:Severe | TGCATTGTCAAACCTTTAATGTTTTATTCTCTACAGTGTCCACCTACAAGTTTGGAC | 14422 |
| gb:MT027062 | Organism:Severe | TGCATTGTCAAACCTTTAATGTTTTATTCTCTACAGTGTCCACCTACAAGTTTGGAC | 14422 |
| gb:MT019529 | Organism:Severe | TGCATTGTCAAACCTTTAATGTTTTATTCTCTACAGTGTCCACCTACAAGTTTGGAC | 14422 |
| gb:MN996529 | Organism:Severe | TGCATTGTCAAACCTTTAATGTTTTATTCTCTACAGTGTCCACCTACAAGTTTGGAC | 14410 |
| gb:MN996531 | Organism:Severe | TGCATTGTCAAACCTTTAATGTTTTATTCTCTACAGTGTCCACCTACAAGTTTGGAC | 14409 |
| gb:MT066176 | Organism:Severe | TGCATTGTCAAACCTTTAATGTTTTATTCTCTACAGTGTCCACCTACAAGTTTGGAC | 14422 |
| gb:MT027064 | Organism:Severe | TGCATTGTCAAACCTTTAATGTTTTATTCTCTACAGTGTCCACCTACAAGTTTGGAC | 14422 |
| gb:MN994468 | Organism:Severe | TGCATTGTCAAACCTTTAATGTTTTATTCTCTACAGTGTCCACCTACAAGTTTGGAC | 14422 |
| gb:MT072688 | Organism:Severe | TGCATTGTCAAACCTTTAATGTTTTATTCTCTACAGTGTCCACCTACAAGTTTGGAC | 14407 |
| gb:MN996527 | Organism:Severe | TGCATTGTCAAACCTTTAATGTTTTATTCTCTACAGTGTCCACCTACAAGTTTGGAC | 14389 |
| gb:MT093631 | Organism:Severe | TGCATTGTCAAACCTTTAATGTTTTATTCTCTACAGTGTCCACCTACAAGTTTGGAC | 14460 |
| gb:MT106053 | Organism:Severe | TGCATTGTCAAACCTTTAATGTTTTATTCTCTACAGTGTCCACCTACAAGTTTGGAC | 14422 |
| gb:MT019533 | Organism:Severe | TGCATTGTCAAACCTTTAATGTTTTATTCTCTACAGTGTCCACCTACAAGTTTGGAC | 14422 |
| gb:MT019531 | Organism:Severe | TGCATTGTCAAACCTTTAATGTTTTATTCTCTACAGTGTCCACCTACAAGTTTGGAC | 14422 |
| gb:MN996528 | Organism:Severe | TGCATTGTCAAACCTTTAATGTTTTATTCTCTACAGTGTCCACCTACAAGTTTGGAC | 14422 |
| gb:MN996530 | Organism:Severe | TGCATTGTCAAACCTTTAATGTTTTATTCTCTACAGTGTCCACCTACAAGTTTGGAC | 14408 |
| gb:MN908947 | Organism:Severe | TGCATTGTCAAACCTTTAATGTTTTATTCTCTACAGTGTCCACCTACAAGTTTGGAC | 14422 |
| gb:MT019532 | Organism:Severe | TGCATTGTCAAACCTTTAATGTTTTATTCTCTACAGTGTCCACCTACAAGTTTGGAC | 14422 |

\*\*\*\*\*

|             |                 |                                                             |       |
|-------------|-----------------|-------------------------------------------------------------|-------|
| gb:MT020781 | Organism:Severe | CACTAGTGAGAAAAATATTTGTTGATGGTGTCCATTTGTAGTTTCAACTGGATACCACT | 14470 |
| gb:MT007544 | Organism:Severe | CACTAGTGAGAAAAATATTTGTTGATGGTGTCCATTTGTAGTTTCAACTGGATACCACT | 14482 |
| gb:MN994467 | Organism:Severe | CACTAGTGAGAAAAATATTTGTTGATGGTGTCCATTTGTAGTTTCAACTGGATACCACT | 14482 |
| gb:MT044257 | Organism:Severe | CACTAGTGAGAAAAATATTTGTTGATGGTGTCCATTTGTAGTTTCAACTGGATACCACT | 14482 |
| gb:MT106054 | Organism:Severe | CACTAGTGAGAAAAATATTTGTTGATGGTGTCCATTTGTAGTTTCAACTGGATACCACT | 14482 |
| gb:MT049951 | Organism:Severe | CACTAGTGAGAAAAATATTTGTTGATGGTGTCCATTTGTAGTTTCAACTGGATACCACT | 14482 |
| gb:MN975262 | Organism:Severe | CACTAGTGAGAAAAATATTTGTTGATGGTGTCCATTTGTAGTTTCAACTGGATACCACT | 14482 |
| gb:MT106052 | Organism:Severe | CACTAGTGAGAAAAATATTTGTTGATGGTGTCCATTTGTAGTTTCAACTGGATACCACT | 14482 |
| gb:LC522975 | Organism:Severe | CACTAGTGAGAAAAATATTTGTTGATGGTGTCCATTTGTAGTTTCAACTGGATACCACT | 14479 |
| gb:LC522973 | Organism:Severe | CACTAGTGAGAAAAATATTTGTTGATGGTGTCCATTTGTAGTTTCAACTGGATACCACT | 14479 |
| gb:LC522974 | Organism:Severe | CACTAGTGAGAAAAATATTTGTTGATGGTGTCCATTTGTAGTTTCAACTGGATACCACT | 14479 |
| gb:MN985325 | Organism:Severe | CACTAGTGAGAAAAATATTTGTTGATGGTGTCCATTTGTAGTTTCAACTGGATACCACT | 14482 |
| gb:MT020881 | Organism:Severe | CACTAGTGAGAAAAATATTTGTTGATGGTGTCCATTTGTAGTTTCAACTGGATACCACT | 14482 |
| gb:MT020880 | Organism:Severe | CACTAGTGAGAAAAATATTTGTTGATGGTGTCCATTTGTAGTTTCAACTGGATACCACT | 14482 |
| gb:MT066175 | Organism:Severe | CACTAGTGAGAAAAATATTTGTTGATGGTGTCCATTTGTAGTTTCAACTGGATACCACT | 14482 |
| gb:MN997409 | Organism:Severe | CACTAGTGAGAAAAATATTTGTTGATGGTGTCCATTTGTAGTTTCAACTGGATACCACT | 14482 |
| gb:MN938384 | Organism:Severe | CACTAGTGAGAAAAATATTTGTTGATGGTGTCCATTTGTAGTTTCAACTGGATACCACT | 14450 |
| gb:MT044258 | Organism:Severe | CACTAGTGAGAAAAATATTTGTTGATGGTGTCCATTTGTAGTTTCAACTGGATACCACT | 14458 |
| gb:MT039890 | Organism:Severe | CACTAGTGAGAAAAATATTTGTTGATGGTGTCCATTTGTAGTTTCAACTGGATACCACT | 14482 |
| gb:MN988713 | Organism:Severe | CACTAGTGAGAAAAATATTTGTTGATGGTGTCCATTTGTAGTTTCAACTGGATACCACT | 14482 |
| gb:LC521925 | Organism:Severe | CACTAGTGAGAAAAATATTTGTTGATGGTGTCCATTTGTAGTTTCAACTGGATACCACT | 14455 |
| gb:MT093571 | Organism:Severe | CACTAGTGAGAAAAATATTTGTTGATGGTGTCCATTTGTAGTTTCAACTGGATACCACT | 14482 |
| gb:MT039887 | Organism:Severe | CACTAGTGAGAAAAATATTTGTTGATGGTGTCCATTTGTAGTTTCAACTGGATACCACT | 14482 |
| gb:MT019530 | Organism:Severe | CACTAGTGAGAAAAATATTTGTTGATGGTGTCCATTTGTAGTTTCAACTGGATACCACT | 14482 |
| gb:MT039888 | Organism:Severe | CACTAGTGAGAAAAATATTTGTTGATGGTGTCCATTTGTAGTTTCAACTGGATACCACT | 14482 |

|             |                 |                                                             |       |
|-------------|-----------------|-------------------------------------------------------------|-------|
| gb:LC522972 | Organism:Severe | CACTAGTGAGAAAAATATTTGTTGATGGTGTCCATTTGTAGTTTCAACTGGATACCACT | 14479 |
| gb:MT027063 | Organism:Severe | CACTAGTGAGAAAAATATTTGTTGATGGTGTCCATTTGTAGTTTCAACTGGATACCACT | 14482 |
| gb:MT027062 | Organism:Severe | CACTAGTGAGAAAAATATTTGTTGATGGTGTCCATTTGTAGTTTCAACTGGATACCACT | 14482 |
| gb:MT019529 | Organism:Severe | CACTAGTGAGAAAAATATTTGTTGATGGTGTCCATTTGTAGTTTCAACTGGATACCACT | 14482 |
| gb:MN996529 | Organism:Severe | CACTAGTGAGAAAAATATTTGTTGATGGTGTCCATTTGTAGTTTCAACTGGATACCACT | 14470 |
| gb:MN996531 | Organism:Severe | CACTAGTGAGAAAAATATTTGTTGATGGTGTCCATTTGTAGTTTCAACTGGATACCACT | 14469 |
| gb:MT066176 | Organism:Severe | CACTAGTGAGAAAAATATTTGTTGATGGTGTCCATTTGTAGTTTCAACTGGATACCACT | 14482 |
| gb:MT027064 | Organism:Severe | CACTAGTGAGAAAAATATTTGTTGATGGTGTCCATTTGTAGTTTCAACTGGATACCACT | 14482 |
| gb:MN994468 | Organism:Severe | CACTAGTGAGAAAAATATTTGTTGATGGTGTCCATTTGTAGTTTCAACTGGATACCACT | 14482 |
| gb:MT072688 | Organism:Severe | CACTAGTGAGAAAAATATTTGTTGATGGTGTCCATTTGTAGTTTCAACTGGATACCACT | 14467 |
| gb:MN996527 | Organism:Severe | CACTAGTGAGAAAAATATTTGTTGATGGTGTCCATTTGTAGTTTCAACTGGATACCACT | 14449 |
| gb:MT093631 | Organism:Severe | CACTAGTGAGAAAAATATTTGTTGATGGTGTCCATTTGTAGTTTCAACTGGATACCACT | 14520 |
| gb:MT106053 | Organism:Severe | CACTAGTGAGAAAAATATTTGTTGATGGTGTCCATTTGTAGTTTCAACTGGATACCACT | 14482 |
| gb:MT019533 | Organism:Severe | CACTAGTGAGAAAAATATTTGTTGATGGTGTCCATTTGTAGTTTCAACTGGATACCACT | 14482 |
| gb:MT019531 | Organism:Severe | CACTAGTGAGAAAAATATTTGTTGATGGTGTCCATTTGTAGTTTCAACTGGATACCACT | 14482 |
| gb:MN996528 | Organism:Severe | CACTAGTGAGAAAAATATTTGTTGATGGTGTCCATTTGTAGTTTCAACTGGATACCACT | 14482 |
| gb:MN996530 | Organism:Severe | CACTAGTGAGAAAAATATTTGTTGATGGTGTCCATTTGTAGTTTCAACTGGATACCACT | 14468 |
| gb:MN908947 | Organism:Severe | CACTAGTGAGAAAAATATTTGTTGATGGTGTCCATTTGTAGTTTCAACTGGATACCACT | 14482 |
| gb:MT019532 | Organism:Severe | CACTAGTGAGAAAAATATTTGTTGATGGTGTCCATTTGTAGTTTCAACTGGATACCACT | 14482 |

\*\*\*\*\*

|             |                 |                                                              |       |
|-------------|-----------------|--------------------------------------------------------------|-------|
| gb:MT020781 | Organism:Severe | TCAGAGAGCTAGGTGTTGTACATAATCAGGATGTAACCTTACATAGCTCTAGACTTAGTT | 14530 |
| gb:MT007544 | Organism:Severe | TCAGAGAGCTAGGTGTTGTACATAATCAGGATGTAACCTTACATAGCTCTAGACTTAGTT | 14542 |
| gb:MN994467 | Organism:Severe | TCAGAGAGCTAGGTGTTGTACATAATCAGGATGTAACCTTACATAGCTCTAGACTTAGTT | 14542 |
| gb:MT044257 | Organism:Severe | TCAGAGAGCTAGGTGTTGTACATAATCAGGATGTAACCTTACATAGCTCTAGACTTAGTT | 14542 |
| gb:MT106054 | Organism:Severe | TCAGAGAGCTAGGTGTTGTACATAATCAGGATGTAACCTTACATAGCTCTAGACTTAGTT | 14542 |
| gb:MT049951 | Organism:Severe | TCAGAGAGCTAGGTGTTGTACATAATCAGGATGTAACCTTACATAGCTCTAGACTTAGTT | 14542 |
| gb:MN975262 | Organism:Severe | TCAGAGAGCTAGGTGTTGTACATAATCAGGATGTAACCTTACATAGCTCTAGACTTAGTT | 14542 |
| gb:MT106052 | Organism:Severe | TCAGAGAGCTAGGTGTTGTACATAATCAGGATGTAACCTTACATAGCTCTAGACTTAGTT | 14542 |
| gb:LC522975 | Organism:Severe | TCAGAGAGCTAGGTGTTGTACATAATCAGGATGTAACCTTACATAGCTCTAGACTTAGTT | 14539 |
| gb:LC522973 | Organism:Severe | TCAGAGAGCTAGGTGTTGTACATAATCAGGATGTAACCTTACATAGCTCTAGACTTAGTT | 14539 |
| gb:LC522974 | Organism:Severe | TCAGAGAGCTAGGTGTTGTACATAATCAGGATGTAACCTTACATAGCTCTAGACTTAGTT | 14539 |
| gb:MN985325 | Organism:Severe | TCAGAGAGCTAGGTGTTGTACATAATCAGGATGTAACCTTACATAGCTCTAGACTTAGTT | 14542 |
| gb:MT020881 | Organism:Severe | TCAGAGAGCTAGGTGTTGTACATAATCAGGATGTAACCTTACATAGCTCTAGACTTAGTT | 14542 |
| gb:MT020880 | Organism:Severe | TCAGAGAGCTAGGTGTTGTACATAATCAGGATGTAACCTTACATAGCTCTAGACTTAGTT | 14542 |
| gb:MT066175 | Organism:Severe | TCAGAGAGCTAGGTGTTGTACATAATCAGGATGTAACCTTACATAGCTCTAGACTTAGTT | 14542 |
| gb:MN997409 | Organism:Severe | TCAGAGAGCTAGGTGTTGTACATAATCAGGATGTAACCTTACATAGCTCTAGACTTAGTT | 14542 |
| gb:MN938384 | Organism:Severe | TCAGAGAGCTAGGTGTTGTACATAATCAGGATGTAACCTTACATAGCTCTAGACTTAGTT | 14510 |
| gb:MT044258 | Organism:Severe | TCAGAGAGCTAGGTGTTGTACATAATCAGGATGTAACCTTACATAGCTCTAGACTTAGTT | 14518 |
| gb:MT039890 | Organism:Severe | TCAGAGAGCTAGGTGTTGTACATAATCAGGATGTAACCTTACATAGCTCTAGACTTAGTT | 14542 |
| gb:MN988713 | Organism:Severe | TCAGAGAGCTAGGTGTTGTACATAATCAGGATGTAACCTTACATAGCTCTAGACTTAGTT | 14542 |
| gb:LC521925 | Organism:Severe | TCAGAGAGCTAGGTGTTGTACATAATCAGGATGTAACCTTACATAGCTCTAGACTTAGTT | 14515 |
| gb:MT093571 | Organism:Severe | TCAGAGAGCTAGGTGTTGTACATAATCAGGATGTAACCTTACATAGCTCTAGACTTAGTT | 14542 |
| gb:MT039887 | Organism:Severe | TCAGAGAGCTAGGTGTTGTACATAATCAGGATGTAACCTTACATAGCTCTAGACTTAGTT | 14542 |
| gb:MT019530 | Organism:Severe | TCAGAGAGCTAGGTGTTGTACATAATCAGGATGTAACCTTACATAGCTCTAGACTTAGTT | 14542 |
| gb:MT039888 | Organism:Severe | TCAGAGAGCTAGGTGTTGTACATAATCAGGATGTAACCTTACATAGCTCTAGACTTAGTT | 14542 |
| gb:LC522972 | Organism:Severe | TCAGAGAGCTAGGTGTTGTACATAATCAGGATGTAACCTTACATAGCTCTAGACTTAGTT | 14539 |
| gb:MT027063 | Organism:Severe | TCAGAGAGCTAGGTGTTGTACATAATCAGGATGTAACCTTACATAGCTCTAGACTTAGTT | 14542 |
| gb:MT027062 | Organism:Severe | TCAGAGAGCTAGGTGTTGTACATAATCAGGATGTAACCTTACATAGCTCTAGACTTAGTT | 14542 |
| gb:MT019529 | Organism:Severe | TCAGAGAGCTAGGTGTTGTACATAATCAGGATGTAACCTTACATAGCTCTAGACTTAGTT | 14542 |
| gb:MN996529 | Organism:Severe | TCAGAGAGCTAGGTGTTGTACATAATCAGGATGTAACCTTACATAGCTCTAGACTTAGTT | 14530 |
| gb:MN996531 | Organism:Severe | TCAGAGAGCTAGGTGTTGTACATAATCAGGATGTAACCTTACATAGCTCTAGACTTAGTT | 14529 |
| gb:MT066176 | Organism:Severe | TCAGAGAGCTAGGTGTTGTACATAATCAGGATGTAACCTTACATAGCTCTAGACTTAGTT | 14542 |
| gb:MT027064 | Organism:Severe | TCAGAGAGCTAGGTGTTGTACATAATCAGGATGTAACCTTACATAGCTCTAGACTTAGTT | 14542 |
| gb:MN994468 | Organism:Severe | TCAGAGAGCTAGGTGTTGTACATAATCAGGATGTAACCTTACATAGCTCTAGACTTAGTT | 14542 |
| gb:MT072688 | Organism:Severe | TCAGAGAGCTAGGTGTTGTACATAATCAGGATGTAACCTTACATAGCTCTAGACTTAGTT | 14527 |
| gb:MN996527 | Organism:Severe | TCAGAGAGCTAGGTGTTGTACATAATCAGGATGTAACCTTACATAGCTCTAGACTTAGTT | 14509 |
| gb:MT093631 | Organism:Severe | TCAGAGAGCTAGGTGTTGTACATAATCAGGATGTAACCTTACATAGCTCTAGACTTAGTT | 14580 |
| gb:MT106053 | Organism:Severe | TCAGAGAGCTAGGTGTTGTACATAATCAGGATGTAACCTTACATAGCTCTAGACTTAGTT | 14542 |
| gb:MT019533 | Organism:Severe | TCAGAGAGCTAGGTGTTGTACATAATCAGGATGTAACCTTACATAGCTCTAGACTTAGTT | 14542 |
| gb:MT019531 | Organism:Severe | TCAGAGAGCTAGGTGTTGTACATAATCAGGATGTAACCTTACATAGCTCTAGACTTAGTT | 14542 |
| gb:MN996528 | Organism:Severe | TCAGAGAGCTAGGTGTTGTACATAATCAGGATGTAACCTTACATAGCTCTAGACTTAGTT | 14542 |
| gb:MN996530 | Organism:Severe | TCAGAGAGCTAGGTGTTGTACATAATCAGGATGTAACCTTACATAGCTCTAGACTTAGTT | 14528 |
| gb:MN908947 | Organism:Severe | TCAGAGAGCTAGGTGTTGTACATAATCAGGATGTAACCTTACATAGCTCTAGACTTAGTT | 14542 |
| gb:MT019532 | Organism:Severe | TCAGAGAGCTAGGTGTTGTACATAATCAGGATGTAACCTTACATAGCTCTAGACTTAGTT | 14542 |



|             |                 |                                                              |       |
|-------------|-----------------|--------------------------------------------------------------|-------|
| gb:MT044258 | Organism:Severe | TACTAGATAAACGCACTACGTGCTTTTCAGTAGCTGCACTTACTAACAATGTTGCTTTTC | 14638 |
| gb:MT039890 | Organism:Severe | TACTAGATAAACGCACTACGTGCTTTTCAGTAGCTGCACTTACTAACAATGTTGCTTTTC | 14662 |
| gb:MN988713 | Organism:Severe | TACTAGATAAACGCACTACGTGCTTTTCAGTAGCTGCACTTACTAACAATGTTGCTTTTC | 14662 |
| gb:LC521925 | Organism:Severe | TACTAGATAAACGCACTACGTGCTTTTCAGTAGCTGCACTTACTAACAATGTTGCTTTTC | 14635 |
| gb:MT093571 | Organism:Severe | TACTAGATAAACGCACTACGTGCTTTTCAGTAGCTGCACTTACTAACAATGTTGCTTTTC | 14662 |
| gb:MT039887 | Organism:Severe | TACTAGATAAACGCACTACGTGCTTTTCAGTAGCTGCACTTACTAACAATGTTGCTTTTC | 14662 |
| gb:MT019530 | Organism:Severe | TACTAGATAAACGCACTACGTGCTTTTCAGTAGCTGCACTTACTAACAATGTTGCTTTTC | 14662 |
| gb:MT039888 | Organism:Severe | TACTAGATAAACGCACTACGTGCTTTTCAGTAGCTGCACTTACTAACAATGTTGCTTTTC | 14662 |
| gb:LC522972 | Organism:Severe | TACTAGATAAACGCACTACGTGCTTTTCAGTAGCTGCACTTACTAACAATGTTGCTTTTC | 14659 |
| gb:MT027063 | Organism:Severe | TACTAGATAAACGCACTACGTGCTTTTCAGTAGCTGCACTTACTAACAATGTTGCTTTTC | 14662 |
| gb:MT027062 | Organism:Severe | TACTAGATAAACGCACTACGTGCTTTTCAGTAGCTGCACTTACTAACAATGTTGCTTTTC | 14662 |
| gb:MT019529 | Organism:Severe | TACTAGATAAACGCACTACGTGCTTTTCAGTAGCTGCACTTACTAACAATGTTGCTTTTC | 14662 |
| gb:MN996529 | Organism:Severe | TACTAGATAAACGCACTACGTGCTTTTCAGTAGCTGCACTTACTAACAATGTTGCTTTTC | 14650 |
| gb:MN996531 | Organism:Severe | TACTAGATAAACGCACTACGTGCTTTTCAGTAGCTGCACTTACTAACAATGTTGCTTTTC | 14649 |
| gb:MT066176 | Organism:Severe | TACTAGATAAACGCACTACGTGCTTTTCAGTAGCTGCACTTACTAACAATGTTGCTTTTC | 14662 |
| gb:MT027064 | Organism:Severe | TACTAGATAAACGCACTACGTGCTTTTCAGTAGCTGCACTTACTAACAATGTTGCTTTTC | 14662 |
| gb:MN994468 | Organism:Severe | TACTAGATAAACGCACTACGTGCTTTTCAGTAGCTGCACTTACTAACAATGTTGCTTTTC | 14662 |
| gb:MT072688 | Organism:Severe | TACTAGATAAACGCACTACGTGCTTTTCAGTAGCTGCACTTACTAACAATGTTGCTTTTC | 14647 |
| gb:MN996527 | Organism:Severe | TACTAGATAAACGCACTACGTGCTTTTCAGTAGCTGCACTTACTAACAATGTTGCTTTTC | 14629 |
| gb:MT093631 | Organism:Severe | TACTAGATAAACGCACTACGTGCTTTTCAGTAGCTGCACTTACTAACAATGTTGCTTTTC | 14700 |
| gb:MT106053 | Organism:Severe | TACTAGATAAACGCACTACGTGCTTTTCAGTAGCTGCACTTACTAACAATGTTGCTTTTC | 14662 |
| gb:MT019533 | Organism:Severe | TACTAGATAAACGCACTACGTGCTTTTCAGTAGCTGCACTTACTAACAATGTTGCTTTTC | 14662 |
| gb:MT019531 | Organism:Severe | TACTAGATAAACGCACTACGTGCTTTTCAGTAGCTGCACTTACTAACAATGTTGCTTTTC | 14662 |
| gb:MN996528 | Organism:Severe | TACTAGATAAACGCACTACGTGCTTTTCAGTAGCTGCACTTACTAACAATGTTGCTTTTC | 14662 |
| gb:MN996530 | Organism:Severe | TACTAGATAAACGCACTACGTGCTTTTCAGTAGCTGCACTTACTAACAATGTTGCTTTTC | 14648 |
| gb:MN908947 | Organism:Severe | TACTAGATAAACGCACTACGTGCTTTTCAGTAGCTGCACTTACTAACAATGTTGCTTTTC | 14662 |
| gb:MT019532 | Organism:Severe | TACTAGATAAACGCACTACGTGCTTTTCAGTAGCTGCACTTACTAACAATGTTGCTTTTC | 14662 |

\*\*\*\*\*

|             |                 |                                                               |       |
|-------------|-----------------|---------------------------------------------------------------|-------|
| gb:MT020781 | Organism:Severe | AAACTGTCAAACCCGGTAATTTTAAACAAAGACTTCTATGACTTTGCTGTGTCTAAGGGTT | 14710 |
| gb:MT007544 | Organism:Severe | AAACTGTCAAACCCGGTAATTTTAAACAAAGACTTCTATGACTTTGCTGTGTCTAAGGGTT | 14722 |
| gb:MN994467 | Organism:Severe | AAACTGTCAAACCCGGTAATTTTAAACAAAGACTTCTATGACTTTGCTGTGTCTAAGGGTT | 14722 |
| gb:MT044257 | Organism:Severe | AAACTGTCAAACCCGGTAATTTTAAACAAAGACTTCTATGACTTTGCTGTGTCTAAGGGTT | 14722 |
| gb:MT106054 | Organism:Severe | AAACTGTCAAACCCGGTAATTTTAAACAAAGACTTCTATGACTTTGCTGTGTCTAAGGGTT | 14722 |
| gb:MT049951 | Organism:Severe | AAACTGTCAAACCCGGTAATTTTAAACAAAGACTTCTATGACTTTGCTGTGTCTAAGGGTT | 14722 |
| gb:MN975262 | Organism:Severe | AAACTGTCAAACCCGGTAATTTTAAACAAAGACTTCTATGACTTTGCTGTGTCTAAGGGTT | 14722 |
| gb:MT106052 | Organism:Severe | AAACTGTCAAACCCGGTAATTTTAAACAAAGACTTCTATGACTTTGCTGTGTCTAAGGGTT | 14722 |
| gb:LC522975 | Organism:Severe | AAACTGTCAAACCCGGTAATTTTAAACAAAGACTTCTATGACTTTGCTGTGTCTAAGGGTT | 14719 |
| gb:LC522973 | Organism:Severe | AAACTGTCAAACCCGGTAATTTTAAACAAAGACTTCTATGACTTTGCTGTGTCTAAGGGTT | 14719 |
| gb:LC522974 | Organism:Severe | AAACTGTCAAACCCGGTAATTTTAAACAAAGACTTCTATGACTTTGCTGTGTCTAAGGGTT | 14719 |
| gb:MN985325 | Organism:Severe | AAACTGTCAAACCCGGTAATTTTAAACAAAGACTTCTATGACTTTGCTGTGTCTAAGGGTT | 14722 |
| gb:MT020881 | Organism:Severe | AAACTGTCAAACCCGGTAATTTTAAACAAAGACTTCTATGACTTTGCTGTGTCTAAGGGTT | 14722 |
| gb:MT020880 | Organism:Severe | AAACTGTCAAACCCGGTAATTTTAAACAAAGACTTCTATGACTTTGCTGTGTCTAAGGGTT | 14722 |
| gb:MT066175 | Organism:Severe | AAACTGTCAAACCCGGTAATTTTAAACAAAGACTTCTATGACTTTGCTGTGTCTAAGGGTT | 14722 |
| gb:MN997409 | Organism:Severe | AAACTGTCAAACCCGGTAATTTTAAACAAAGACTTCTATGACTTTGCTGTGTCTAAGGGTT | 14722 |
| gb:MN938384 | Organism:Severe | AAACTGTCAAACCCGGTAATTTTAAACAAAGACTTCTATGACTTTGCTGTGTCTAAGGGTT | 14690 |
| gb:MT044258 | Organism:Severe | AAACTGTCAAACCCGGTAATTTTAAACAAAGACTTCTATGACTTTGCTGTGTCTAAGGGTT | 14698 |
| gb:MT039890 | Organism:Severe | AAACTGTCAAACCCGGTAATTTTAAACAAAGACTTCTATGACTTTGCTGTGTCTAAGGGTT | 14722 |
| gb:MN988713 | Organism:Severe | AAACTGTCAAACCCGGTAATTTTAAACAAAGACTTCTATGACTTTGCTGTGTCTAAGGGTT | 14722 |
| gb:LC521925 | Organism:Severe | AAACTGTCAAACCCGGTAATTTTAAACAAAGACTTCTATGACTTTGCTGTGTCTAAGGGTT | 14695 |
| gb:MT093571 | Organism:Severe | AAACTGTCAAACCCGGTAATTTTAAACAAAGACTTCTATGACTTTGCTGTGTCTAAGGGTT | 14722 |
| gb:MT039887 | Organism:Severe | AAACTGTCAAACCCGGTAATTTTAAACAAAGACTTCTATGACTTTGCTGTGTCTAAGGGTT | 14722 |
| gb:MT019530 | Organism:Severe | AAACTGTCAAACCCGGTAATTTTAAACAAAGACTTCTATGACTTTGCTGTGTCTAAGGGTT | 14722 |
| gb:MT039888 | Organism:Severe | AAACTGTCAAACCCGGTAATTTTAAACAAAGACTTCTATGACTTTGCTGTGTCTAAGGGTT | 14722 |
| gb:LC522972 | Organism:Severe | AAACTGTCAAACCCGGTAATTTTAAACAAAGACTTCTATGACTTTGCTGTGTCTAAGGGTT | 14719 |
| gb:MT027063 | Organism:Severe | AAACTGTCAAACCCGGTAATTTTAAACAAAGACTTCTATGACTTTGCTGTGTCTAAGGGTT | 14722 |
| gb:MT027062 | Organism:Severe | AAACTGTCAAACCCGGTAATTTTAAACAAAGACTTCTATGACTTTGCTGTGTCTAAGGGTT | 14722 |
| gb:MT019529 | Organism:Severe | AAACTGTCAAACCCGGTAATTTTAAACAAAGACTTCTATGACTTTGCTGTGTCTAAGGGTT | 14722 |
| gb:MN996529 | Organism:Severe | AAACTGTCAAACCCGGTAATTTTAAACAAAGACTTCTATGACTTTGCTGTGTCTAAGGGTT | 14710 |
| gb:MN996531 | Organism:Severe | AAACTGTCAAACCCGGTAATTTTAAACAAAGACTTCTATGACTTTGCTGTGTCTAAGGGTT | 14709 |
| gb:MT066176 | Organism:Severe | AAACTGTCAAACCCGGTAATTTTAAACAAAGACTTCTATGACTTTGCTGTGTCTAAGGGTT | 14722 |
| gb:MT027064 | Organism:Severe | AAACTGTCAAACCCGGTAATTTTAAACAAAGACTTCTATGACTTTGCTGTGTCTAAGGGTT | 14722 |
| gb:MN994468 | Organism:Severe | AAACTGTCAAACCCGGTAATTTTAAACAAAGACTTCTATGACTTTGCTGTGTCTAAGGGTT | 14722 |
| gb:MT072688 | Organism:Severe | AAACTGTCAAACCCGGTAATTTTAAACAAAGACTTCTATGACTTTGCTGTGTCTAAGGGTT | 14707 |
| gb:MN996527 | Organism:Severe | AAACTGTCAAACCCGGTAATTTTAAACAAAGACTTCTATGACTTTGCTGTGTCTAAGGGTT | 14689 |

|             |                 |                                                               |       |
|-------------|-----------------|---------------------------------------------------------------|-------|
| gb:MT093631 | Organism:Severe | AAACTGTCAAACCCGGTAATTTTAAACAAAGACTTCTATGACTTTGCTGTGTCTAAGGGTT | 14760 |
| gb:MT106053 | Organism:Severe | AAACTGTCAAACCCGGTAATTTTAAACAAAGACTTCTATGACTTTGCTGTGTCTAAGGGTT | 14722 |
| gb:MT019533 | Organism:Severe | AAACTGTCAAACCCGGTAATTTTAAACAAAGACTTCTATGACTTTGCTGTGTCTAAGGGTT | 14722 |
| gb:MT019531 | Organism:Severe | AAACTGTCAAACCCGGTAATTTTAAACAAAGACTTCTATGACTTTGCTGTGTCTAAGGGTT | 14722 |
| gb:MN996528 | Organism:Severe | AAACTGTCAAACCCGGTAATTTTAAACAAAGACTTCTATGACTTTGCTGTGTCTAAGGGTT | 14722 |
| gb:MN996530 | Organism:Severe | AAACTGTCAAACCCGGTAATTTTAAACAAAGACTTCTATGACTTTGCTGTGTCTAAGGGTT | 14708 |
| gb:MN908947 | Organism:Severe | AAACTGTCAAACCCGGTAATTTTAAACAAAGACTTCTATGACTTTGCTGTGTCTAAGGGTT | 14722 |
| gb:MT019532 | Organism:Severe | AAACTGTCAAACCCGGTAATTTTAAACAAAGACTTCTATGACTTTGCTGTGTCTAAGGGTT | 14722 |

\*\*\*\*\*

|             |                 |                                                              |       |
|-------------|-----------------|--------------------------------------------------------------|-------|
| gb:MT020781 | Organism:Severe | TCTTTAAGGAAGGAAGTTCGTGTTGAATTAACAACTTCTTCTTTGCTCAGGATGGTAATG | 14770 |
| gb:MT007544 | Organism:Severe | TCTTTAAGGAAGGAAGTTCGTGTTGAATTAACAACTTCTTCTTTGCTCAGGATGGTAATG | 14782 |
| gb:MN994467 | Organism:Severe | TCTTTAAGGAAGGAAGTTCGTGTTGAATTAACAACTTCTTCTTTGCTCAGGATGGTAATG | 14782 |
| gb:MT044257 | Organism:Severe | TCTTTAAGGAAGGAAGTTCGTGTTGAATTAACAACTTCTTCTTTGCTCAGGATGGTAATG | 14782 |
| gb:MT106054 | Organism:Severe | TCTTTAAGGAAGGAAGTTCGTGTTGAATTAACAACTTCTTCTTTGCTCAGGATGGTAATG | 14782 |
| gb:MT049951 | Organism:Severe | TCTTTAAGGAAGGAAGTTCGTGTTGAATTAACAACTTCTTCTTTGCTCAGGATGGTAATG | 14782 |
| gb:MN975262 | Organism:Severe | TCTTTAAGGAAGGAAGTTCGTGTTGAATTAACAACTTCTTCTTTGCTCAGGATGGTAATG | 14782 |
| gb:MT106052 | Organism:Severe | TCTTTAAGGAAGGAAGTTCGTGTTGAATTAACAACTTCTTCTTTGCTCAGGATGGTAATG | 14782 |
| gb:LC522975 | Organism:Severe | TCTTTAAGGAAGGAAGTTCGTGTTGAATTAACAACTTCTTCTTTGCTCAGGATGGTAATG | 14779 |
| gb:LC522973 | Organism:Severe | TCTTTAAGGAAGGAAGTTCGTGTTGAATTAACAACTTCTTCTTTGCTCAGGATGGTAATG | 14779 |
| gb:LC522974 | Organism:Severe | TCTTTAAGGAAGGAAGTTCGTGTTGAATTAACAACTTCTTCTTTGCTCAGGATGGTAATG | 14779 |
| gb:MN985325 | Organism:Severe | TCTTTAAGGAAGGAAGTTCGTGTTGAATTAACAACTTCTTCTTTGCTCAGGATGGTAATG | 14782 |
| gb:MT020881 | Organism:Severe | TCTTTAAGGAAGGAAGTTCGTGTTGAATTAACAACTTCTTCTTTGCTCAGGATGGTAATG | 14782 |
| gb:MT020880 | Organism:Severe | TCTTTAAGGAAGGAAGTTCGTGTTGAATTAACAACTTCTTCTTTGCTCAGGATGGTAATG | 14782 |
| gb:MT066175 | Organism:Severe | TCTTTAAGGAAGGAAGTTCGTGTTGAATTAACAACTTCTTCTTTGCTCAGGATGGTAATG | 14782 |
| gb:MN997409 | Organism:Severe | TCTTTAAGGAAGGAAGTTCGTGTTGAATTAACAACTTCTTCTTTGCTCAGGATGGTAATG | 14782 |
| gb:MN938384 | Organism:Severe | TCTTTAAGGAAGGAAGTTCGTGTTGAATTAACAACTTCTTCTTTGCTCAGGATGGTAATG | 14750 |
| gb:MT044258 | Organism:Severe | TCTTTAAGGAAGGAAGTTCGTGTTGAATTAACAACTTCTTCTTTGCTCAGGATGGTAATG | 14758 |
| gb:MT039890 | Organism:Severe | TCTTTAAGGAAGGAAGTTCGTGTTGAATTAACAACTTCTTCTTTGCTCAGGATGGTAATG | 14782 |
| gb:MN988713 | Organism:Severe | TCTTTAAGGAAGGAAGTTCGTGTTGAATTAACAACTTCTTCTTTGCTCAGGATGGTAATG | 14782 |
| gb:LC521925 | Organism:Severe | TCTTTAAGGAAGGAAGTTCGTGTTGAATTAACAACTTCTTCTTTGCTCAGGATGGTAATG | 14755 |
| gb:MT093571 | Organism:Severe | TCTTTAAGGAAGGAAGTTCGTGTTGAATTAACAACTTCTTCTTTGCTCAGGATGGTAATG | 14782 |
| gb:MT039887 | Organism:Severe | TCTTTAAGGAAGGAAGTTCGTGTTGAATTAACAACTTCTTCTTTGCTCAGGATGGTAATG | 14782 |
| gb:MT019530 | Organism:Severe | TCTTTAAGGAAGGAAGTTCGTGTTGAATTAACAACTTCTTCTTTGCTCAGGATGGTAATG | 14782 |
| gb:MT039888 | Organism:Severe | TCTTTAAGGAAGGAAGTTCGTGTTGAATTAACAACTTCTTCTTTGCTCAGGATGGTAATG | 14782 |
| gb:LC522972 | Organism:Severe | TCTTTAAGGAAGGAAGTTCGTGTTGAATTAACAACTTCTTCTTTGCTCAGGATGGTAATG | 14779 |
| gb:MT027063 | Organism:Severe | TCTTTAAGGAAGGAAGTTCGTGTTGAATTAACAACTTCTTCTTTGCTCAGGATGGTAATG | 14782 |
| gb:MT027062 | Organism:Severe | TCTTTAAGGAAGGAAGTTCGTGTTGAATTAACAACTTCTTCTTTGCTCAGGATGGTAATG | 14782 |
| gb:MT019529 | Organism:Severe | TCTTTAAGGAAGGAAGTTCGTGTTGAATTAACAACTTCTTCTTTGCTCAGGATGGTAATG | 14782 |
| gb:MN996529 | Organism:Severe | TCTTTAAGGAAGGAAGTTCGTGTTGAATTAACAACTTCTTCTTTGCTCAGGATGGTAATG | 14770 |
| gb:MN996531 | Organism:Severe | TCTTTAAGGAAGGAAGTTCGTGTTGAATTAACAACTTCTTCTTTGCTCAGGATGGTAATG | 14769 |
| gb:MT066176 | Organism:Severe | TCTTTAAGGAAGGAAGTTCGTGTTGAATTAACAACTTCTTCTTTGCTCAGGATGGTAATG | 14782 |
| gb:MT027064 | Organism:Severe | TCTTTAAGGAAGGAAGTTCGTGTTGAATTAACAACTTCTTCTTTGCTCAGGATGGTAATG | 14782 |
| gb:MN994468 | Organism:Severe | TCTTTAAGGAAGGAAGTTCGTGTTGAATTAACAACTTCTTCTTTGCTCAGGATGGTAATG | 14782 |
| gb:MT072688 | Organism:Severe | TCTTTAAGGAAGGAAGTTCGTGTTGAATTAACAACTTCTTCTTTGCTCAGGATGGTAATG | 14767 |
| gb:MN996527 | Organism:Severe | TCTTTAAGGAAGGAAGTTCGTGTTGAATTAACAACTTCTTCTTTGCTCAGGATGGTAATG | 14749 |
| gb:MT093631 | Organism:Severe | TCTTTAAGGAAGGAAGTTCGTGTTGAATTAACAACTTCTTCTTTGCTCAGGATGGTAATG | 14820 |
| gb:MT106053 | Organism:Severe | TCTTTAAGGAAGGAAGTTCGTGTTGAATTAACAACTTCTTCTTTGCTCAGGATGGTAATG | 14782 |
| gb:MT019533 | Organism:Severe | TCTTTAAGGAAGGAAGTTCGTGTTGAATTAACAACTTCTTCTTTGCTCAGGATGGTAATG | 14782 |
| gb:MT019531 | Organism:Severe | TCTTTAAGGAAGGAAGTTCGTGTTGAATTAACAACTTCTTCTTTGCTCAGGATGGTAATG | 14782 |
| gb:MN996528 | Organism:Severe | TCTTTAAGGAAGGAAGTTCGTGTTGAATTAACAACTTCTTCTTTGCTCAGGATGGTAATG | 14782 |
| gb:MN996530 | Organism:Severe | TCTTTAAGGAAGGAAGTTCGTGTTGAATTAACAACTTCTTCTTTGCTCAGGATGGTAATG | 14768 |
| gb:MN908947 | Organism:Severe | TCTTTAAGGAAGGAAGTTCGTGTTGAATTAACAACTTCTTCTTTGCTCAGGATGGTAATG | 14782 |
| gb:MT019532 | Organism:Severe | TCTTTAAGGAAGGAAGTTCGTGTTGAATTAACAACTTCTTCTTTGCTCAGGATGGTAATG | 14782 |

\*\*\*\*\*

|             |                 |                                                              |       |
|-------------|-----------------|--------------------------------------------------------------|-------|
| gb:MT020781 | Organism:Severe | CTGCTATCAGCGATTATGACTACTATCGTTATAATCTACCAACAATGTGTGATATCAGAC | 14830 |
| gb:MT007544 | Organism:Severe | CTGCTATCAGCGATTATGACTACTATCGTTATAATCTACCAACAATGTGTGATATCAGAC | 14842 |
| gb:MN994467 | Organism:Severe | CTGCTATCAGCGATTATGACTACTATCGTTATAATCTACCAACAATGTGTGATATCAGAC | 14842 |
| gb:MT044257 | Organism:Severe | CTGCTATCAGCGATTATGACTACTATCGTTATAATCTACCAACAATGTGTGATATCAGAC | 14842 |
| gb:MT106054 | Organism:Severe | CTGCTATCAGCGATTATGACTACTATCGTTATAATCTACCAACAATGTGTGATATCAGAC | 14842 |
| gb:MT049951 | Organism:Severe | CTGCTATCAGCGATTATGACTACTATCGTTATAATCTACCAACAATGTGTGATATCAGAC | 14842 |
| gb:MN975262 | Organism:Severe | CTGCTATCAGCGATTATGACTACTATCGTTATAATCTACCAACAATGTGTGATATCAGAC | 14842 |
| gb:MT106052 | Organism:Severe | CTGCTATCAGCGATTATGACTACTATCGTTATAATCTACCAACAATGTGTGATATCAGAC | 14842 |
| gb:LC522975 | Organism:Severe | CTGCTATCAGCGATTATGACTACTATCGTTATAATCTACCAACAATGTGTGATATCAGAC | 14839 |





|             |                 |                                                              |       |
|-------------|-----------------|--------------------------------------------------------------|-------|
| gb:MT019529 | Organism:Severe | AACTACTATTTGTAGTTGAAGTTGTTGATAAGTACTTTGATTGTTACGATGGTGGCTGTA | 14902 |
| gb:MN996529 | Organism:Severe | AACTACTATTTGTAGTTGAAGTTGTTGATAAGTACTTTGATTGTTACGATGGTGGCTGTA | 14890 |
| gb:MN996531 | Organism:Severe | AACTACTATTTGTAGTTGAAGTTGTTGATAAGTACTTTGATTGTTACGATGGTGGCTGTA | 14889 |
| gb:MT066176 | Organism:Severe | AACTACTATTTGTAGTTGAAGTTGTTGATAAGTACTTTGATTGTTACGATGGTGGCTGTA | 14902 |
| gb:MT027064 | Organism:Severe | AACTACTATTTGTAGTTGAAGTTGTTGATAAGTACTTTGATTGTTACGATGGTGGCTGTA | 14902 |
| gb:MN994468 | Organism:Severe | AACTACTATTTGTAGTTGAAGTTGTTGATAAGTACTTTGATTGTTACGATGGTGGCTGTA | 14902 |
| gb:MT072688 | Organism:Severe | AACTACTATTTGTAGTTGAAGTTGTTGATAAGTACTTTGATTGTTACGATGGTGGCTGTA | 14887 |
| gb:MN996527 | Organism:Severe | AACTACTATTTGTAGTTGAAGTTGTTGATAAGTACTTTGATTGTTACGATGGTGGCTGTA | 14869 |
| gb:MT093631 | Organism:Severe | AACTACTATTTGTAGTTGAAGTTGTTGATAAGTACTTTGATTGTTACGATGGTGGCTGTA | 14940 |
| gb:MT106053 | Organism:Severe | AACTACTATTTGTAGTTGAAGTTGTTGATAAGTACTTTGATTGTTACGATGGTGGCTGTA | 14902 |
| gb:MT019533 | Organism:Severe | AACTACTATTTGTAGTTGAAGTTGTTGATAAGTACTTTGATTGTTACGATGGTGGCTGTA | 14902 |
| gb:MT019531 | Organism:Severe | AACTACTATTTGTAGTTGAAGTTGTTGATAAGTACTTTGATTGTTACGATGGTGGCTGTA | 14902 |
| gb:MN996528 | Organism:Severe | AACTACTATTTGTAGTTGAAGTTGTTGATAAGTACTTTGATTGTTACGATGGTGGCTGTA | 14902 |
| gb:MN996530 | Organism:Severe | AACTACTATTTGTAGTTGAAGTTGTTGATAAGTACTTTGATTGTTACGATGGTGGCTGTA | 14888 |
| gb:MN908947 | Organism:Severe | AACTACTATTTGTAGTTGAAGTTGTTGATAAGTACTTTGATTGTTACGATGGTGGCTGTA | 14902 |
| gb:MT019532 | Organism:Severe | AACTACTATTTGTAGTTGAAGTTGTTGATAAGTACTTTGATTGTTACGATGGTGGCTGTA | 14902 |

\*\*\*\*\*

|             |                 |                                                              |       |
|-------------|-----------------|--------------------------------------------------------------|-------|
| gb:MT020781 | Organism:Severe | TTAATGCTAACCAAGTCATCGTCAACAACCTAGACAAATCAGCTGGTTTTCCATTTAATA | 14950 |
| gb:MT007544 | Organism:Severe | TTAATGCTAACCAAGTCATCGTCAACAACCTAGACAAATCAGCTGGTTTTCCATTTAATA | 14962 |
| gb:MN994467 | Organism:Severe | TTAATGCTAACCAAGTCATCGTCAACAACCTAGACAAATCAGCTGGTTTTCCATTTAATA | 14962 |
| gb:MT044257 | Organism:Severe | TTAATGCTAACCAAGTCATCGTCAACAACCTAGACAAATCAGCTGGTTTTCCATTTAATA | 14962 |
| gb:MT106054 | Organism:Severe | TTAATGCTAACCAAGTCATCGTCAACAACCTAGACAAATCAGCTGGTTTTCCATTTAATA | 14962 |
| gb:MT049951 | Organism:Severe | TTAATGCTAACCAAGTCATCGTCAACAACCTAGACAAATCAGCTGGTTTTCCATTTAATA | 14962 |
| gb:MN975262 | Organism:Severe | TTAATGCTAACCAAGTCATCGTCAACAACCTAGACAAATCAGCTGGTTTTCCATTTAATA | 14962 |
| gb:MT106052 | Organism:Severe | TTAATGCTAACCAAGTCATCGTCAACAACCTAGACAAATCAGCTGGTTTTCCATTTAATA | 14962 |
| gb:LC522975 | Organism:Severe | TTAATGCTAACCAAGTCATCGTCAACAACCTAGACAAATCAGCTGGTTTTCCATTTAATA | 14959 |
| gb:LC522973 | Organism:Severe | TTAATGCTAACCAAGTCATCGTCAACAACCTAGACAAATCAGCTGGTTTTCCATTTAATA | 14959 |
| gb:LC522974 | Organism:Severe | TTAATGCTAACCAAGTCATCGTCAACAACCTAGACAAATCAGCTGGTTTTCCATTTAATA | 14959 |
| gb:MN985325 | Organism:Severe | TTAATGCTAACCAAGTCATCGTCAACAACCTAGACAAATCAGCTGGTTTTCCATTTAATA | 14962 |
| gb:MT020881 | Organism:Severe | TTAATGCTAACCAAGTCATCGTCAACAACCTAGACAAATCAGCTGGTTTTCCATTTAATA | 14962 |
| gb:MT020880 | Organism:Severe | TTAATGCTAACCAAGTCATCGTCAACAACCTAGACAAATCAGCTGGTTTTCCATTTAATA | 14962 |
| gb:MT066175 | Organism:Severe | TTAATGCTAACCAAGTCATCGTCAACAACCTAGACAAATCAGCTGGTTTTCCATTTAATA | 14962 |
| gb:MN997409 | Organism:Severe | TTAATGCTAACCAAGTCATCGTCAACAACCTAGACAAATCAGCTGGTTTTCCATTTAATA | 14962 |
| gb:MN938384 | Organism:Severe | TTAATGCTAACCAAGTCATCGTCAACAACCTAGACAAATCAGCTGGTTTTCCATTTAATA | 14930 |
| gb:MT044258 | Organism:Severe | TTAATGCTAACCAAGTCATCGTCAACAACCTAGACAAATCAGCTGGTTTTCCATTTAATA | 14938 |
| gb:MT039890 | Organism:Severe | TTAATGCTAACCAAGTCATCGTCAACAACCTAGACAAATCAGCTGGTTTTCCATTTAATA | 14962 |
| gb:MN988713 | Organism:Severe | TTAATGCTAACCAAGTCATCGTCAACAACCTAGACAAATCAGCTGGTTTTCCATTTAATA | 14962 |
| gb:LC521925 | Organism:Severe | TTAATGCTAACCAAGTCATCGTCAACAACCTAGACAAATCAGCTGGTTTTCCATTTAATA | 14935 |
| gb:MT093571 | Organism:Severe | TTAATGCTAACCAAGTCATCGTCAACAACCTAGACAAATCAGCTGGTTTTCCATTTAATA | 14962 |
| gb:MT039887 | Organism:Severe | TTAATGCTAACCAAGTCATCGTCAACAACCTAGACAAATCAGCTGGTTTTCCATTTAATA | 14962 |
| gb:MT019530 | Organism:Severe | TTAATGCTAACCAAGTCATCGTCAACAACCTAGACAAATCAGCTGGTTTTCCATTTAATA | 14962 |
| gb:MT039888 | Organism:Severe | TTAATGCTAACCAAGTCATCGTCAACAACCTAGACAAATCAGCTGGTTTTCCATTTAATA | 14962 |
| gb:LC522972 | Organism:Severe | TTAATGCTAACCAAGTCATCGTCAACAACCTAGACAAATCAGCTGGTTTTCCATTTAATA | 14959 |
| gb:MT027063 | Organism:Severe | TTAATGCTAACCAAGTCATCGTCAACAACCTAGACAAATCAGCTGGTTTTCCATTTAATA | 14962 |
| gb:MT027062 | Organism:Severe | TTAATGCTAACCAAGTCATCGTCAACAACCTAGACAAATCAGCTGGTTTTCCATTTAATA | 14962 |
| gb:MT019529 | Organism:Severe | TTAATGCTAACCAAGTCATCGTCAACAACCTAGACAAATCAGCTGGTTTTCCATTTAATA | 14962 |
| gb:MN996529 | Organism:Severe | TTAATGCTAACCAAGTCATCGTCAACAACCTAGACAAATCAGCTGGTTTTCCATTTAATA | 14950 |
| gb:MN996531 | Organism:Severe | TTAATGCTAACCAAGTCATCGTCAACAACCTAGACAAATCAGCTGGTTTTCCATTTAATA | 14949 |
| gb:MT066176 | Organism:Severe | TTAATGCTAACCAAGTCATCGTCAACAACCTAGACAAATCAGCTGGTTTTCCATTTAATA | 14962 |
| gb:MT027064 | Organism:Severe | TTAATGCTAACCAAGTCATCGTCAACAACCTAGACAAATCAGCTGGTTTTCCATTTAATA | 14962 |
| gb:MN994468 | Organism:Severe | TTAATGCTAACCAAGTCATCGTCAACAACCTAGACAAATCAGCTGGTTTTCCATTTAATA | 14962 |
| gb:MT072688 | Organism:Severe | TTAATGCTAACCAAGTCATCGTCAACAACCTAGACAAATCAGCTGGTTTTCCATTTAATA | 14947 |
| gb:MN996527 | Organism:Severe | TTAATGCTAACCAAGTCATCGTCAACAACCTAGACAAATCAGCTGGTTTTCCATTTAATA | 14929 |
| gb:MT093631 | Organism:Severe | TTAATGCTAACCAAGTCATCGTCAACAACCTAGACAAATCAGCTGGTTTTCCATTTAATA | 15000 |
| gb:MT106053 | Organism:Severe | TTAATGCTAACCAAGTCATCGTCAACAACCTAGACAAATCAGCTGGTTTTCCATTTAATA | 14962 |
| gb:MT019533 | Organism:Severe | TTAATGCTAACCAAGTCATCGTCAACAACCTAGACAAATCAGCTGGTTTTCCATTTAATA | 14962 |
| gb:MT019531 | Organism:Severe | TTAATGCTAACCAAGTCATCGTCAACAACCTAGACAAATCAGCTGGTTTTCCATTTAATA | 14962 |
| gb:MN996528 | Organism:Severe | TTAATGCTAACCAAGTCATCGTCAACAACCTAGACAAATCAGCTGGTTTTCCATTTAATA | 14962 |
| gb:MN996530 | Organism:Severe | TTAATGCTAACCAAGTCATCGTCAACAACCTAGACAAATCAGCTGGTTTTCCATTTAATA | 14948 |
| gb:MN908947 | Organism:Severe | TTAATGCTAACCAAGTCATCGTCAACAACCTAGACAAATCAGCTGGTTTTCCATTTAATA | 14962 |
| gb:MT019532 | Organism:Severe | TTAATGCTAACCAAGTCATCGTCAACAACCTAGACAAATCAGCTGGTTTTCCATTTAATA | 14962 |

\*\*\*\*\*

|             |                 |                                                              |       |
|-------------|-----------------|--------------------------------------------------------------|-------|
| gb:MT020781 | Organism:Severe | AATGGGGTAAGGCTAGACTTTATTATGATTCAATGAGTTATGAGGATCAAGATGCACTTT | 15010 |
|-------------|-----------------|--------------------------------------------------------------|-------|



|             |                 |                                      |       |
|-------------|-----------------|--------------------------------------|-------|
| gb:LC521925 | Organism:Severe | TGCGATATACAAAACGTAATGTCATCCCTACTATAA | 15055 |
| gb:MT093571 | Organism:Severe | TGCGATATACAAAACGTAATGTCATCCCTACTATAA | 15082 |
| gb:MT039887 | Organism:Severe | TGCGATATACAAAACGTAATGTCATCCCTACTATAA | 15082 |
| gb:MT019530 | Organism:Severe | TGCGATATACAAAACGTAATGTCATCCCTACTATAA | 15082 |
| gb:MT039888 | Organism:Severe | TGCGATATACAAAACGTAATGTCATCCCTACTATAA | 15082 |
| gb:LC522972 | Organism:Severe | TGCGATATACAAAACGTAATGTCATCCCTACTATAA | 15079 |
| gb:MT027063 | Organism:Severe | TGCGATATACAAAACGTAATGTCATCCCTACTATAA | 15082 |
| gb:MT027062 | Organism:Severe | TGCGATATACAAAACGTAATGTCATCCCTACTATAA | 15082 |
| gb:MT019529 | Organism:Severe | TGCGATATACAAAACGTAATGTCATCCCTACTATAA | 15082 |
| gb:MN996529 | Organism:Severe | TGCGATATACAAAACGTAATGTCATCCCTACTATAA | 15070 |
| gb:MN996531 | Organism:Severe | TGCGATATACAAAACGTAATGTCATCCCTACTATAA | 15069 |
| gb:MT066176 | Organism:Severe | TGCGATATACAAAACGTAATGTCATCCCTACTATAA | 15082 |
| gb:MT027064 | Organism:Severe | TGCGATATACAAAACGTAATGTCATCCCTACTATAA | 15082 |
| gb:MN994468 | Organism:Severe | TGCGATATACAAAACGTAATGTCATCCCTACTATAA | 15082 |
| gb:MT072688 | Organism:Severe | TGCGATATACAAAACGTAATGTCATCCCTACTATAA | 15067 |
| gb:MN996527 | Organism:Severe | TGCGATATACAAAACGTAATGTCATCCCTACTATAA | 15049 |
| gb:MT093631 | Organism:Severe | TGCGATATACAAAACGTAATGTCATCCCTACTATAA | 15120 |
| gb:MT106053 | Organism:Severe | TGCGATATACAAAACGTAATGTCATCCCTACTATAA | 15082 |
| gb:MT019533 | Organism:Severe | TGCGATATACAAAACGTAATGTCATCCCTACTATAA | 15082 |
| gb:MT019531 | Organism:Severe | TGCGATATACAAAACGTAATGTCATCCCTACTATAA | 15082 |
| gb:MN996528 | Organism:Severe | TGCGATATACAAAACGTAATGTCATCCCTACTATAA | 15082 |
| gb:MN996530 | Organism:Severe | TGCGATATACAAAACGTAATGTCATCCCTACTATAA | 15068 |
| gb:MN908947 | Organism:Severe | TGCGATATACAAAACGTAATGTCATCCCTACTATAA | 15082 |
| gb:MT019532 | Organism:Severe | TGCGATATACAAAACGTAATGTCATCCCTACTATAA | 15082 |

\*\*\*\*\*

|             |                 |                                                              |       |
|-------------|-----------------|--------------------------------------------------------------|-------|
| gb:MT020781 | Organism:Severe | TTAGTGCAAAGAATAGAGCTCGCACCGTAGCTGGTGTCTCTATCTGTAGTACTATGACCA | 15130 |
| gb:MT007544 | Organism:Severe | TTAGTGCAAAGAATAGAGCTCGCACCGTAGCTGGTGTCTCTATCTGTAGTACTATGACCA | 15142 |
| gb:MN994467 | Organism:Severe | TTAGTGCAAAGAATAGAGCTCGCACCGTAGCTGGTGTCTCTATCTGTAGTACTATGACCA | 15142 |
| gb:MT044257 | Organism:Severe | TTAGTGCAAAGAATAGAGCTCGCACCGTAGCTGGTGTCTCTATCTGTAGTACTATGACCA | 15142 |
| gb:MT106054 | Organism:Severe | TTAGTGCAAAGAATAGAGCTCGCACCGTAGCTGGTGTCTCTATCTGTAGTACTATGACCA | 15142 |
| gb:MT049951 | Organism:Severe | TTAGTGCAAAGAATAGAGCTCGCACCGTAGCTGGTGTCTCTATCTGTAGTACTATGACCA | 15142 |
| gb:MN975262 | Organism:Severe | TTAGTGCAAAGAATAGAGCTCGCACCGTAGCTGGTGTCTCTATCTGTAGTACTATGACCA | 15142 |
| gb:MT106052 | Organism:Severe | TTAGTGCAAAGAATAGAGCTCGCACCGTAGCTGGTGTCTCTATCTGTAGTACTATGACCA | 15142 |
| gb:LC522975 | Organism:Severe | TTAGTGCAAAGAATAGAGCTCGCACCGTAGCTGGTGTCTCTATCTGTAGTACTATGACCA | 15139 |
| gb:LC522973 | Organism:Severe | TTAGTGCAAAGAATAGAGCTCGCACCGTAGCTGGTGTCTCTATCTGTAGTACTATGACCA | 15139 |
| gb:LC522974 | Organism:Severe | TTAGTGCAAAGAATAGAGCTCGCACCGTAGCTGGTGTCTCTATCTGTAGTACTATGACCA | 15139 |
| gb:MN985325 | Organism:Severe | TTAGTGCAAAGAATAGAGCTCGCACCGTAGCTGGTGTCTCTATCTGTAGTACTATGACCA | 15142 |
| gb:MT020881 | Organism:Severe | TTAGTGCAAAGAATAGAGCTCGCACCGTAGCTGGTGTCTCTATCTGTAGTACTATGACCA | 15142 |
| gb:MT020880 | Organism:Severe | TTAGTGCAAAGAATAGAGCTCGCACCGTAGCTGGTGTCTCTATCTGTAGTACTATGACCA | 15142 |
| gb:MT066175 | Organism:Severe | TTAGTGCAAAGAATAGAGCTCGCACCGTAGCTGGTGTCTCTATCTGTAGTACTATGACCA | 15142 |
| gb:MN997409 | Organism:Severe | TTAGTGCAAAGAATAGAGCTCGCACCGTAGCTGGTGTCTCTATCTGTAGTACTATGACCA | 15142 |
| gb:MN938384 | Organism:Severe | TTAGTGCAAAGAATAGAGCTCGCACCGTAGCTGGTGTCTCTATCTGTAGTACTATGACCA | 15110 |
| gb:MT044258 | Organism:Severe | TTAGTGCAAAGAATAGAGCTCGCACCGTAGCTGGTGTCTCTATCTGTAGTACTATGACCA | 15118 |
| gb:MT039890 | Organism:Severe | TTAGTGCAAAGAATAGAGCTCGCACCGTAGCTGGTGTCTCTATCTGTAGTACTATGACCA | 15142 |
| gb:MN988713 | Organism:Severe | TTAGTGCAAAGAATAGAGCTCGCACCGTAGCTGGTGTCTCTATCTGTAGTACTATGACCA | 15142 |
| gb:LC521925 | Organism:Severe | TTAGTGCAAAGAATAGAGCTCGCACCGTAGCTGGTGTCTCTATCTGTAGTACTATGACCA | 15115 |
| gb:MT093571 | Organism:Severe | TTAGTGCAAAGAATAGAGCTCGCACCGTAGCTGGTGTCTCTATCTGTAGTACTATGACCA | 15142 |
| gb:MT039887 | Organism:Severe | TTAGTGCAAAGAATAGAGCTCGCACCGTAGCTGGTGTCTCTATCTGTAGTACTATGACCA | 15142 |
| gb:MT019530 | Organism:Severe | TTAGTGCAAAGAATAGAGCTCGCACCGTAGCTGGTGTCTCTATCTGTAGTACTATGACCA | 15142 |
| gb:MT039888 | Organism:Severe | TTAGTGCAAAGAATAGAGCTCGCACCGTAGCTGGTGTCTCTATCTGTAGTACTATGACCA | 15142 |
| gb:LC522972 | Organism:Severe | TTAGTGCAAAGAATAGAGCTCGCACCGTAGCTGGTGTCTCTATCTGTAGTACTATGACCA | 15139 |
| gb:MT027063 | Organism:Severe | TTAGTGCAAAGAATAGAGCTCGCACCGTAGCTGGTGTCTCTATCTGTAGTACTATGACCA | 15142 |
| gb:MT027062 | Organism:Severe | TTAGTGCAAAGAATAGAGCTCGCACCGTAGCTGGTGTCTCTATCTGTAGTACTATGACCA | 15142 |
| gb:MT019529 | Organism:Severe | TTAGTGCAAAGAATAGAGCTCGCACCGTAGCTGGTGTCTCTATCTGTAGTACTATGACCA | 15142 |
| gb:MN996529 | Organism:Severe | TTAGTGCAAAGAATAGAGCTCGCACCGTAGCTGGTGTCTCTATCTGTAGTACTATGACCA | 15130 |
| gb:MN996531 | Organism:Severe | TTAGTGCAAAGAATAGAGCTCGCACCGTAGCTGGTGTCTCTATCTGTAGTACTATGACCA | 15129 |
| gb:MT066176 | Organism:Severe | TTAGTGCAAAGAATAGAGCTCGCACCGTAGCTGGTGTCTCTATCTGTAGTACTATGACCA | 15142 |
| gb:MT027064 | Organism:Severe | TTAGTGCAAAGAATAGAGCTCGCACCGTAGCTGGTGTCTCTATCTGTAGTACTATGACCA | 15142 |
| gb:MN994468 | Organism:Severe | TTAGTGCAAAGAATAGAGCTCGCACCGTAGCTGGTGTCTCTATCTGTAGTACTATGACCA | 15142 |
| gb:MT072688 | Organism:Severe | TTAGTGCAAAGAATAGAGCTCGCACCGTAGCTGGTGTCTCTATCTGTAGTACTATGACCA | 15127 |
| gb:MN996527 | Organism:Severe | TTAGTGCAAAGAATAGAGCTCGCACCGTAGCTGGTGTCTCTATCTGTAGTACTATGACCA | 15109 |
| gb:MT093631 | Organism:Severe | TTAGTGCAAAGAATAGAGCTCGCACCGTAGCTGGTGTCTCTATCTGTAGTACTATGACCA | 15180 |
| gb:MT106053 | Organism:Severe | TTAGTGCAAAGAATAGAGCTCGCACCGTAGCTGGTGTCTCTATCTGTAGTACTATGACCA | 15142 |
| gb:MT019533 | Organism:Severe | TTAGTGCAAAGAATAGAGCTCGCACCGTAGCTGGTGTCTCTATCTGTAGTACTATGACCA | 15142 |

|             |                 |                                                              |       |
|-------------|-----------------|--------------------------------------------------------------|-------|
| gb:MT019531 | Organism:Severe | TTAGTGCAAAGAATAGAGCTCGCACCGTAGCTGGTGTCTCTATCTGTAGTACTATGACCA | 15142 |
| gb:MN996528 | Organism:Severe | TTAGTGCAAAGAATAGAGCTCGCACCGTAGCTGGTGTCTCTATCTGTAGTACTATGACCA | 15142 |
| gb:MN996530 | Organism:Severe | TTAGTGCAAAGAATAGAGCTCGCACCGTAGCTGGTGTCTCTATCTGTAGTACTATGACCA | 15128 |
| gb:MN908947 | Organism:Severe | TTAGTGCAAAGAATAGAGCTCGCACCGTAGCTGGTGTCTCTATCTGTAGTACTATGACCA | 15142 |
| gb:MT019532 | Organism:Severe | TTAGTGCAAAGAATAGAGCTCGCACCGTAGCTGGTGTCTCTATCTGTAGTACTATGACCA | 15142 |

\*\*\*\*\*

|             |                 |                                                              |       |
|-------------|-----------------|--------------------------------------------------------------|-------|
| gb:MT020781 | Organism:Severe | ATAGACAGTTTCATCAAAAATTATTGAAATCAATAGCCGCCACTAGAGGAGCTACTGTAG | 15190 |
| gb:MT007544 | Organism:Severe | ATAGACAGTTTCATCAAAAATTATTGAAATCAATAGCCGCCACTAGAGGAGCTACTGTAG | 15202 |
| gb:MN994467 | Organism:Severe | ATAGACAGTTTCATCAAAAATTATTGAAATCAATAGCCGCCACTAGAGGAGCTACTGTAG | 15202 |
| gb:MT044257 | Organism:Severe | ATAGACAGTTTCATCAAAAATTATTGAAATCAATAGCCGCCACTAGAGGAGCTACTGTAG | 15202 |
| gb:MT106054 | Organism:Severe | ATAGACAGTTTCATCAAAAATTATTGAAATCAATAGCCGCCACTAGAGGAGCTACTGTAG | 15202 |
| gb:MT049951 | Organism:Severe | ATAGACAGTTTCATCAAAAATTATTGAAATCAATAGCCGCCACTAGAGGAGCTACTGTAG | 15202 |
| gb:MN975262 | Organism:Severe | ATAGACAGTTTCATCAAAAATTATTGAAATCAATAGCCGCCACTAGAGGAGCTACTGTAG | 15202 |
| gb:MT106052 | Organism:Severe | ATAGACAGTTTCATCAAAAATTATTGAAATCAATAGCCGCCACTAGAGGAGCTACTGTAG | 15202 |
| gb:LC522975 | Organism:Severe | ATAGACAGTTTCATCAAAAATTATTGAAATCAATAGCCGCCACTAGAGGAGCTACTGTAG | 15199 |
| gb:LC522973 | Organism:Severe | ATAGACAGTTTCATCAAAAATTATTGAAATCAATAGCCGCCACTAGAGGAGCTACTGTAG | 15199 |
| gb:LC522974 | Organism:Severe | ATAGACAGTTTCATCAAAAATTATTGAAATCAATAGCCGCCACTAGAGGAGCTACTGTAG | 15199 |
| gb:MN985325 | Organism:Severe | ATAGACAGTTTCATCAAAAATTATTGAAATCAATAGCCGCCACTAGAGGAGCTACTGTAG | 15202 |
| gb:MT020881 | Organism:Severe | ATAGACAGTTTCATCAAAAATTATTGAAATCAATAGCCGCCACTAGAGGAGCTACTGTAG | 15202 |
| gb:MT020880 | Organism:Severe | ATAGACAGTTTCATCAAAAATTATTGAAATCAATAGCCGCCACTAGAGGAGCTACTGTAG | 15202 |
| gb:MT066175 | Organism:Severe | ATAGACAGTTTCATCAAAAATTATTGAAATCAATAGCCGCCACTAGAGGAGCTACTGTAG | 15202 |
| gb:MN997409 | Organism:Severe | ATAGACAGTTTCATCAAAAATTATTGAAATCAATAGCCGCCACTAGAGGAGCTACTGTAG | 15202 |
| gb:MN938384 | Organism:Severe | ATAGACAGTTTCATCAAAAATTATTGAAATCAATAGCCGCCACTAGAGGAGCTACTGTAG | 15170 |
| gb:MT044258 | Organism:Severe | ATAGACAGTTTCATCAAAAATTATTGAAATCAATAGCCGCCACTAGAGGAGCTACTGTAG | 15178 |
| gb:MT039890 | Organism:Severe | ATAGACAGTTTCATCAAAAATTATTGAAATCAATAGCCGCCACTAGAGGAGCTACTGTAG | 15202 |
| gb:MN988713 | Organism:Severe | ATAGACAGTTTCATCAAAAATTATTGAAATCAATAGCCGCCACTAGAGGAGCTACTGTAG | 15202 |
| gb:LC521925 | Organism:Severe | ATAGACAGTTTCATCAAAAATTATTGAAATCAATAGCCGCCACTAGAGGAGCTACTGTAG | 15175 |
| gb:MT093571 | Organism:Severe | ATAGACAGTTTCATCAAAAATTATTGAAATCAATAGCCGCCACTAGAGGAGCTACTGTAG | 15202 |
| gb:MT039887 | Organism:Severe | ATAGACAGTTTCATCAAAAATTATTGAAATCAATAGCCGCCACTAGAGGAGCTACTGTAG | 15202 |
| gb:MT019530 | Organism:Severe | ATAGACAGTTTCATCAAAAATTATTGAAATCAATAGCCGCCACTAGAGGAGCTACTGTAG | 15202 |
| gb:MT039888 | Organism:Severe | ATAGACAGTTTCATCAAAAATTATTGAAATCAATAGCCGCCACTAGAGGAGCTACTGTAG | 15202 |
| gb:LC522972 | Organism:Severe | ATAGACAGTTTCATCAAAAATTATTGAAATCAATAGCCGCCACTAGAGGAGCTACTGTAG | 15199 |
| gb:MT027063 | Organism:Severe | ATAGACAGTTTCATCAAAAATTATTGAAATCAATAGCCGCCACTAGAGGAGCTACTGTAG | 15202 |
| gb:MT027062 | Organism:Severe | ATAGACAGTTTCATCAAAAATTATTGAAATCAATAGCCGCCACTAGAGGAGCTACTGTAG | 15202 |
| gb:MT019529 | Organism:Severe | ATAGACAGTTTCATCAAAAATTATTGAAATCAATAGCCGCCACTAGAGGAGCTACTGTAG | 15202 |
| gb:MN996529 | Organism:Severe | ATAGACAGTTTCATCAAAAATTATTGAAATCAATAGCCGCCACTAGAGGAGCTACTGTAG | 15190 |
| gb:MN996531 | Organism:Severe | ATAGACAGTTTCATCAAAAATTATTGAAATCAATAGCCGCCACTAGAGGAGCTACTGTAG | 15189 |
| gb:MT066176 | Organism:Severe | ATAGACAGTTTCATCAAAAATTATTGAAATCAATAGCCGCCACTAGAGGAGCTACTGTAG | 15202 |
| gb:MT027064 | Organism:Severe | ATAGACAGTTTCATCAAAAATTATTGAAATCAATAGCCGCCACTAGAGGAGCTACTGTAG | 15202 |
| gb:MN994468 | Organism:Severe | ATAGACAGTTTCATCAAAAATTATTGAAATCAATAGCCGCCACTAGAGGAGCTACTGTAG | 15202 |
| gb:MT072688 | Organism:Severe | ATAGACAGTTTCATCAAAAATTATTGAAATCAATAGCCGCCACTAGAGGAGCTACTGTAG | 15187 |
| gb:MN996527 | Organism:Severe | ATAGACAGTTTCATCAAAAATTATTGAAATCAATAGCCGCCACTAGAGGAGCTACTGTAG | 15169 |
| gb:MT093631 | Organism:Severe | ATAGACAGTTTCATCAAAAATTATTGAAATCAATAGCCGCCACTAGAGGAGCTACTGTAG | 15240 |
| gb:MT106053 | Organism:Severe | ATAGACAGTTTCATCAAAAATTATTGAAATCAATAGCCGCCACTAGAGGAGCTACTGTAG | 15202 |
| gb:MT019533 | Organism:Severe | ATAGACAGTTTCATCAAAAATTATTGAAATCAATAGCCGCCACTAGAGGAGCTACTGTAG | 15202 |
| gb:MT019531 | Organism:Severe | ATAGACAGTTTCATCAAAAATTATTGAAATCAATAGCCGCCACTAGAGGAGCTACTGTAG | 15202 |
| gb:MN996528 | Organism:Severe | ATAGACAGTTTCATCAAAAATTATTGAAATCAATAGCCGCCACTAGAGGAGCTACTGTAG | 15202 |
| gb:MN996530 | Organism:Severe | ATAGACAGTTTCATCAAAAATTATTGAAATCAATAGCCGCCACTAGAGGAGCTACTGTAG | 15188 |
| gb:MN908947 | Organism:Severe | ATAGACAGTTTCATCAAAAATTATTGAAATCAATAGCCGCCACTAGAGGAGCTACTGTAG | 15202 |
| gb:MT019532 | Organism:Severe | ATAGACAGTTTCATCAAAAATTATTGAAATCAATAGCCGCCACTAGAGGAGCTACTGTAG | 15202 |

\*\*\*\*\*

|             |                 |                                                            |       |
|-------------|-----------------|------------------------------------------------------------|-------|
| gb:MT020781 | Organism:Severe | TAATTGGAACAAGCAAATTCATGGTGGTTGGCACAACATGTTAAAACTGTTTATAGTG | 15250 |
| gb:MT007544 | Organism:Severe | TAATTGGAACAAGCAAATTCATGGTGGTTGGCACAACATGTTAAAACTGTTTATAGTG | 15262 |
| gb:MN994467 | Organism:Severe | TAATTGGAACAAGCAAATTCATGGTGGTTGGCACAACATGTTAAAACTGTTTATAGTG | 15262 |
| gb:MT044257 | Organism:Severe | TAATTGGAACAAGCAAATTCATGGTGGTTGGCACAACATGTTAAAACTGTTTATAGTG | 15262 |
| gb:MT106054 | Organism:Severe | TAATTGGAACAAGCAAATTCATGGTGGTTGGCACAACATGTTAAAACTGTTTATAGTG | 15262 |
| gb:MT049951 | Organism:Severe | TAATTGGAACAAGCAAATTCATGGTGGTTGGCACAACATGTTAAAACTGTTTATAGTG | 15262 |
| gb:MN975262 | Organism:Severe | TAATTGGAACAAGCAAATTCATGGTGGTTGGCACAACATGTTAAAACTGTTTATAGTG | 15262 |
| gb:MT106052 | Organism:Severe | TAATTGGAACAAGCAAATTCATGGTGGTTGGCACAACATGTTAAAACTGTTTATAGTG | 15262 |
| gb:LC522975 | Organism:Severe | TAATTGGAACAAGCAAATTCATGGTGGTTGGCACAACATGTTAAAACTGTTTATAGTG | 15259 |
| gb:LC522973 | Organism:Severe | TAATTGGAACAAGCAAATTCATGGTGGTTGGCACAACATGTTAAAACTGTTTATAGTG | 15259 |
| gb:LC522974 | Organism:Severe | TAATTGGAACAAGCAAATTCATGGTGGTTGGCACAACATGTTAAAACTGTTTATAGTG | 15259 |
| gb:MN985325 | Organism:Severe | TAATTGGAACAAGCAAATTCATGGTGGTTGGCACAACATGTTAAAACTGTTTATAGTG | 15262 |



|             |                 |                                                             |       |
|-------------|-----------------|-------------------------------------------------------------|-------|
| gb:MT066176 | Organism:Severe | ATGTAGAAAACCTCACCTTATGGGTTGGGATTATCCTAAATGTGATAGAGCCATGCCTA | 15322 |
| gb:MT027064 | Organism:Severe | ATGTAGAAAACCTCACCTTATGGGTTGGGATTATCCTAAATGTGATAGAGCCATGCCTA | 15322 |
| gb:MN994468 | Organism:Severe | ATGTAGAAAACCTCACCTTATGGGTTGGGATTATCCTAAATGTGATAGAGCCATGCCTA | 15322 |
| gb:MT072688 | Organism:Severe | ATGTAGAAAACCTCACCTTATGGGTTGGGATTATCCTAAATGTGATAGAGCCATGCCTA | 15307 |
| gb:MN996527 | Organism:Severe | ATGTAGAAAACCTCACCTTATGGGTTGGGATTATCCTAAATGTGATAGAGCCATGCCTA | 15289 |
| gb:MT093631 | Organism:Severe | ATGTAGAAAACCTCACCTTATGGGTTGGGATTATCCTAAATGTGATAGAGCCATGCCTA | 15360 |
| gb:MT106053 | Organism:Severe | ATGTAGAAAACCTCACCTTATGGGTTGGGATTATCCTAAATGTGATAGAGCCATGCCTA | 15322 |
| gb:MT019533 | Organism:Severe | ATGTAGAAAACCTCACCTTATGGGTTGGGATTATCCTAAATGTGATAGAGCCATGCCTA | 15322 |
| gb:MT019531 | Organism:Severe | ATGTAGAAAACCTCACCTTATGGGTTGGGATTATCCTAAATGTGATAGAGCCATGCCTA | 15322 |
| gb:MN996528 | Organism:Severe | ATGTAGAAAACCTCACCTTATGGGTTGGGATTATCCTAAATGTGATAGAGCCATGCCTA | 15322 |
| gb:MN996530 | Organism:Severe | ATGTAGAAAACCTCACCTTATGGGTTGGGATTATCCTAAATGTGATAGAGCCATGCCTA | 15308 |
| gb:MN908947 | Organism:Severe | ATGTAGAAAACCTCACCTTATGGGTTGGGATTATCCTAAATGTGATAGAGCCATGCCTA | 15322 |
| gb:MT019532 | Organism:Severe | ATGTAGAAAACCTCACCTTATGGGTTGGGATTATCCTAAATGTGATAGAGCCATGCCTA | 15322 |

\*\*\*\*\*

|             |                 |                                                              |       |
|-------------|-----------------|--------------------------------------------------------------|-------|
| gb:MT020781 | Organism:Severe | ACATGCTTAGAATTATGGCCTCACTTGTTCCTTGCTCGAAACATACAACGTGTTGTAGCT | 15370 |
| gb:MT007544 | Organism:Severe | ACATGCTTAGAATTATGGCCTCACTTGTTCCTTGCTCGAAACATACAACGTGTTGTAGCT | 15382 |
| gb:MN994467 | Organism:Severe | ACATGCTTAGAATTATGGCCTCACTTGTTCCTTGCTCGAAACATACAACGTGTTGTAGCT | 15382 |
| gb:MT044257 | Organism:Severe | ACATGCTTAGAATTATGGCCTCACTTGTTCCTTGCTCGAAACATACAACGTGTTGTAGCT | 15382 |
| gb:MT106054 | Organism:Severe | ACATGCTTAGAATTATGGCCTCACTTGTTCCTTGCTCGAAACATACAACGTGTTGTAGCT | 15382 |
| gb:MT049951 | Organism:Severe | ACATGCTTAGAATTATGGCCTCACTTGTTCCTTGCTCGAAACATACAACGTGTTGTAGCT | 15382 |
| gb:MN975262 | Organism:Severe | ACATGCTTAGAATTATGGCCTCACTTGTTCCTTGCTCGAAACATACAACGTGTTGTAGCT | 15382 |
| gb:MT106052 | Organism:Severe | ACATGCTTAGAATTATGGCCTCACTTGTTCCTTGCTCGAAACATACAACGTGTTGTAGCT | 15382 |
| gb:LC522975 | Organism:Severe | ACATGCTTAGAATTATGGCCTCACTTGTTCCTTGCTCGAAACATACAACGTGTTGTAGCT | 15379 |
| gb:LC522973 | Organism:Severe | ACATGCTTAGAATTATGGCCTCACTTGTTCCTTGCTCGAAACATACAACGTGTTGTAGCT | 15379 |
| gb:LC522974 | Organism:Severe | ACATGCTTAGAATTATGGCCTCACTTGTTCCTTGCTCGAAACATACAACGTGTTGTAGCT | 15379 |
| gb:MN985325 | Organism:Severe | ACATGCTTAGAATTATGGCCTCACTTGTTCCTTGCTCGAAACATACAACGTGTTGTAGCT | 15382 |
| gb:MT020881 | Organism:Severe | ACATGCTTAGAATTATGGCCTCACTTGTTCCTTGCTCGAAACATACAACGTGTTGTAGCT | 15382 |
| gb:MT020880 | Organism:Severe | ACATGCTTAGAATTATGGCCTCACTTGTTCCTTGCTCGAAACATACAACGTGTTGTAGCT | 15382 |
| gb:MT066175 | Organism:Severe | ACATGCTTAGAATTATGGCCTCACTTGTTCCTTGCTCGAAACATACAACGTGTTGTAGCT | 15382 |
| gb:MN997409 | Organism:Severe | ACATGCTTAGAATTATGGCCTCACTTGTTCCTTGCTCGAAACATACAACGTGTTGTAGCT | 15382 |
| gb:MN938384 | Organism:Severe | ACATGCTTAGAATTATGGCCTCACTTGTTCCTTGCTCGAAACATACAACGTGTTGTAGCT | 15350 |
| gb:MT044258 | Organism:Severe | ACATGCTTAGAATTATGGCCTCACTTGTTCCTTGCTCGAAACATACAACGTGTTGTAGCT | 15358 |
| gb:MT039890 | Organism:Severe | ACATGCTTAGAATTATGGCCTCACTTGTTCCTTGCTCGAAACATACAACGTGTTGTAGCT | 15382 |
| gb:MN988713 | Organism:Severe | ACATGCTTAGAATTATGGCCTCACTTGTTCCTTGCTCGAAACATACAACGTGTTGTAGCT | 15382 |
| gb:LC521925 | Organism:Severe | ACATGCTTAGAATTATGGCCTCACTTGTTCCTTGCTCGAAACATACAACGTGTTGTAGCT | 15355 |
| gb:MT093571 | Organism:Severe | ACATGCTTAGAATTATGGCCTCACTTGTTCCTTGCTCGAAACATACAACGTGTTGTAGCT | 15382 |
| gb:MT039887 | Organism:Severe | ACATGCTTAGAATTATGGCCTCACTTGTTCCTTGCTCGAAACATACAACGTGTTGTAGCT | 15382 |
| gb:MT019530 | Organism:Severe | ACATGCTTAGAATTATGGCCTCACTTGTTCCTTGCTCGAAACATACAACGTGTTGTAGCT | 15382 |
| gb:MT039888 | Organism:Severe | ACATGCTTAGAATTATGGCCTCACTTGTTCCTTGCTCGAAACATACAACGTGTTGTAGCT | 15382 |
| gb:LC522972 | Organism:Severe | ATATGCTTAGAATTATGGCCTCACTTGTTCCTTGCTCGAAACATACAACGTGTTGTAGCT | 15379 |
| gb:MT027063 | Organism:Severe | ACATGCTTAGAATTATGGCCTCACTTGTTCCTTGCTCGAAACATACAACGTGTTGTAGCT | 15382 |
| gb:MT027062 | Organism:Severe | ACATGCTTAGAATTATGGCCTCACTTGTTCCTTGCTCGAAACATACAACGTGTTGTAGCT | 15382 |
| gb:MT019529 | Organism:Severe | ACATGCTTAGAATTATGGCCTCACTTGTTCCTTGCTCGAAACATACAACGTGTTGTAGCT | 15382 |
| gb:MN996529 | Organism:Severe | ACATGCTTAGAATTATGGCCTCACTTGTTCCTTGCTCGAAACATACAACGTGTTGTAGCT | 15370 |
| gb:MN996531 | Organism:Severe | ACATGCTTAGAATTATGGCCTCACTTGTTCCTTGCTCGAAACATACAACGTGTTGTAGCT | 15369 |
| gb:MT066176 | Organism:Severe | ACATGCTTAGAATTATGGCCTCACTTGTTCCTTGCTCGAAACATACAACGTGTTGTAGCT | 15382 |
| gb:MT027064 | Organism:Severe | ACATGCTTAGAATTATGGCCTCACTTGTTCCTTGCTCGAAACATACAACGTGTTGTAGCT | 15382 |
| gb:MN994468 | Organism:Severe | ACATGCTTAGAATTATGGCCTCACTTGTTCCTTGCTCGAAACATACAACGTGTTGTAGCT | 15382 |
| gb:MT072688 | Organism:Severe | ACATGCTTAGAATTATGGCCTCACTTGTTCCTTGCTCGAAACATACAACGTGTTGTAGCT | 15367 |
| gb:MN996527 | Organism:Severe | ACATGCTTAGAATTATGGCCTCACTTGTTCCTTGCTCGAAACATACAACGTGTTGTAGCT | 15349 |
| gb:MT093631 | Organism:Severe | ACATGCTTAGAATTATGGCCTCACTTGTTCCTTGCTCGAAACATACAACGTGTTGTAGCT | 15420 |
| gb:MT106053 | Organism:Severe | ACATGCTTAGAATTATGGCCTCACTTGTTCCTTGCTCGAAACATACAACGTGTTGTAGCT | 15382 |
| gb:MT019533 | Organism:Severe | ACATGCTTAGAATTATGGCCTCACTTGTTCCTTGCTCGAAACATACAACGTGTTGTAGCT | 15382 |
| gb:MT019531 | Organism:Severe | ACATGCTTAGAATTATGGCCTCACTTGTTCCTTGCTCGAAACATACAACGTGTTGTAGCT | 15382 |
| gb:MN996528 | Organism:Severe | ACATGCTTAGAATTATGGCCTCACTTGTTCCTTGCTCGAAACATACAACGTGTTGTAGCT | 15382 |
| gb:MN996530 | Organism:Severe | ACATGCTTAGAATTATGGCCTCACTTGTTCCTTGCTCGAAACATACAACGTGTTGTAGCT | 15368 |
| gb:MN908947 | Organism:Severe | ACATGCTTAGAATTATGGCCTCACTTGTTCCTTGCTCGAAACATACAACGTGTTGTAGCT | 15382 |
| gb:MT019532 | Organism:Severe | ACATGCTTAGAATTATGGCCTCACTTGTTCCTTGCTCGAAACATACAACGTGTTGTAGCT | 15382 |

\* \*\*\*\*\*

|             |                 |                                                             |       |
|-------------|-----------------|-------------------------------------------------------------|-------|
| gb:MT020781 | Organism:Severe | TGTCACACCGTTTCTATAGATTAGCTAATGAGTGTGCTCAAGTATTGAGTAAATGGTCA | 15430 |
| gb:MT007544 | Organism:Severe | TGTCACACCGTTTCTATAGATTAGCTAATGAGTGTGCTCAAGTATTGAGTAAATGGTCA | 15442 |
| gb:MN994467 | Organism:Severe | TGTCACACCGTTTCTATAGATTAGCTAATGAGTGTGCTCAAGTATTGAGTAAATGGTCA | 15442 |
| gb:MT044257 | Organism:Severe | TGTCACACCGTTTCTATAGATTAGCTAATGAGTGTGCTCAAGTATTGAGTAAATGGTCA | 15442 |





|             |                 |                                                           |       |
|-------------|-----------------|-----------------------------------------------------------|-------|
| gb:MT019530 | Organism:Severe | TGTGTGGCGTTCACTATATGTTAAACCAGGTGGAACCTCATCAGGAGATGCCACAAC | 15502 |
| gb:MT039888 | Organism:Severe | TGTGTGGCGTTCACTATATGTTAAACCAGGTGGAACCTCATCAGGAGATGCCACAAC | 15502 |
| gb:LC522972 | Organism:Severe | TGTGTGGCGTTCACTATATGTTAAACCAGGTGGAACCTCATCAGGAGATGCCACAAC | 15499 |
| gb:MT027063 | Organism:Severe | TGTGTGGCGTTCACTATATGTTAAACCAGGTGGAACCTCATCAGGAGATGCCACAAC | 15502 |
| gb:MT027062 | Organism:Severe | TGTGTGGCGTTCACTATATGTTAAACCAGGTGGAACCTCATCAGGAGATGCCACAAC | 15502 |
| gb:MT019529 | Organism:Severe | TGTGTGGCGTTCACTATATGTTAAACCAGGTGGAACCTCATCAGGAGATGCCACAAC | 15502 |
| gb:MN996529 | Organism:Severe | TGTGTGGCGTTCACTATATGTTAAACCAGGTGGAACCTCATCAGGAGATGCCACAAC | 15490 |
| gb:MN996531 | Organism:Severe | TGTGTGGCGTTCACTATATGTTAAACCAGGTGGAACCTCATCAGGAGATGCCACAAC | 15489 |
| gb:MT066176 | Organism:Severe | TGTGTGGCGTTCACTATATGTTAAACCAGGTGGAACCTCATCAGGAGATGCCACAAC | 15502 |
| gb:MT027064 | Organism:Severe | TGTGTGGCGTTCACTATATGTTAAACCAGGTGGAACCTCATCAGGAGATGCCACAAC | 15502 |
| gb:MN994468 | Organism:Severe | TGTGTGGCGTTCACTATATGTTAAACCAGGTGGAACCTCATCAGGAGATGCCACAAC | 15502 |
| gb:MT072688 | Organism:Severe | TGTGTGGCGTTCACTATATGTTAAACCAGGTGGAACCTCATCAGGAGATGCCACAAC | 15487 |
| gb:MN996527 | Organism:Severe | TGTGTGGCGTTCACTATATGTTAAACCAGGTGGAACCTCATCAGGAGATGCCACAAC | 15469 |
| gb:MT093631 | Organism:Severe | TGTGTGGCGTTCACTATATGTTAAACCAGGTGGAACCTCATCAGGAGATGCCACAAC | 15540 |
| gb:MT106053 | Organism:Severe | TGTGTGGCGTTCACTATATGTTAAACCAGGTGGAACCTCATCAGGAGATGCCACAAC | 15502 |
| gb:MT019533 | Organism:Severe | TGTGTGGCGTTCACTATATGTTAAACCAGGTGGAACCTCATCAGGAGATGCCACAAC | 15502 |
| gb:MT019531 | Organism:Severe | TGTGTGGCGTTCACTATATGTTAAACCAGGTGGAACCTCATCAGGAGATGCCACAAC | 15502 |
| gb:MN996528 | Organism:Severe | TGTGTGGCGTTCACTATATGTTAAACCAGGTGGAACCTCATCAGGAGATGCCACAAC | 15502 |
| gb:MN996530 | Organism:Severe | TGTGTGGCGTTCACTATATGTTAAACCAGGTGGAACCTCATCAGGAGATGCCACAAC | 15488 |
| gb:MN908947 | Organism:Severe | TGTGTGGCGTTCACTATATGTTAAACCAGGTGGAACCTCATCAGGAGATGCCACAAC | 15502 |
| gb:MT019532 | Organism:Severe | TGTGTGGCGTTCACTATATGTTAAACCAGGTGGAACCTCATCAGGAGATGCCACAAC | 15502 |

\*\*\*\*\*

|             |                 |                                                              |       |
|-------------|-----------------|--------------------------------------------------------------|-------|
| gb:MT020781 | Organism:Severe | CTTATGCTAATAGTGTTTTTAACATTTGTCAAGCTGTCACGGCCAATGTTAATGCACTTT | 15550 |
| gb:MT007544 | Organism:Severe | CTTATGCTAATAGTGTTTTTAACATTTGTCAAGCTGTCACGGCCAATGTTAATGCACTTT | 15562 |
| gb:MN994467 | Organism:Severe | CTTATGCTAATAGTGTTTTTAACATTTGTCAAGCTGTCACGGCCAATGTTAATGCACTTT | 15562 |
| gb:MT044257 | Organism:Severe | CTTATGCTAATAGTGTTTTTAACATTTGTCAAGCTGTCACGGCCAATGTTAATGCACTTT | 15562 |
| gb:MT106054 | Organism:Severe | CTTATGCTAATAGTGTTTTTAACATTTGTCAAGCTGTCACGGCCAATGTTAATGCACTTT | 15562 |
| gb:MT049951 | Organism:Severe | CTTATGCTAATAGTGTTTTTAACATTTGTCAAGCTGTCACGGCCAATGTTAATGCACTTT | 15562 |
| gb:MN975262 | Organism:Severe | CTTATGCTAATAGTGTTTTTAACATTTGTCAAGCTGTCACGGCCAATGTTAATGCACTTT | 15562 |
| gb:MT106052 | Organism:Severe | CTTATGCTAATAGTGTTTTTAACATTTGTCAAGCTGTCACGGCCAATGTTAATGCACTTT | 15562 |
| gb:LC522975 | Organism:Severe | CTTATGCTAATAGTGTTTTTAACATTTGTCAAGCTGTCACGGCCAATGTTAATGCACTTT | 15559 |
| gb:LC522973 | Organism:Severe | CTTATGCTAATAGTGTTTTTAACATTTGTCAAGCTGTCACGGCCAATGTTAATGCACTTT | 15559 |
| gb:LC522974 | Organism:Severe | CTTATGCTAATAGTGTTTTTAACATTTGTCAAGCTGTCACGGCCAATGTTAATGCACTTT | 15559 |
| gb:MN985325 | Organism:Severe | CTTATGCTAATAGTGTTTTTAACATTTGTCAAGCTGTCACGGCCAATGTTAATGCACTTT | 15562 |
| gb:MT020881 | Organism:Severe | CTTATGCTAATAGTGTTTTTAACATTTGTCAAGCTGTCACGGCCAATGTTAATGCACTTT | 15562 |
| gb:MT020880 | Organism:Severe | CTTATGCTAATAGTGTTTTTAACATTTGTCAAGCTGTCACGGCCAATGTTAATGCACTTT | 15562 |
| gb:MT066175 | Organism:Severe | CTTATGCTAATAGTGTTTTTAACATTTGTCAAGCTGTCACGGCCAATGTTAATGCACTTT | 15562 |
| gb:MN997409 | Organism:Severe | CTTATGCTAATAGTGTTTTTAACATTTGTCAAGCTGTCACGGCCAATGTTAATGCACTTT | 15562 |
| gb:MN938384 | Organism:Severe | CTTATGCTAATAGTGTTTTTAACATTTGTCAAGCTGTCACGGCCAATGTTAATGCACTTT | 15530 |
| gb:MT044258 | Organism:Severe | CTTATGCTAATAGTGTTTTTAACATTTGTCAAGCTGTCACGGCCAATGTTAATGCACTTT | 15538 |
| gb:MT039890 | Organism:Severe | CTTATGCTAATAGTGTTTTTAACATTTGTCAAGCTGTCACGGCCAATGTTAATGCACTTT | 15562 |
| gb:MN988713 | Organism:Severe | CTTATGCTAATAGTGTTTTTAACATTTGTCAAGCTGTCACGGCCAATGTTAATGCACTTT | 15562 |
| gb:LC521925 | Organism:Severe | CTTATGCTAATAGTGTTTTTAACATTTGTCAAGCTGTCACGGCCAATGTTAATGCACTTT | 15535 |
| gb:MT093571 | Organism:Severe | CTTATGCTAATAGTGTTTTTAACATTTGTCAAGCTGTCACGGCCAATGTTAATGCACTTT | 15562 |
| gb:MT039887 | Organism:Severe | CTTATGCTAATAGTGTTTTTAACATTTGTCAAGCTGTCACGGCCAATGTTAATGCACTTT | 15562 |
| gb:MT019530 | Organism:Severe | CTTATGCTAATAGTGTTTTTAACATTTGTCAAGCTGTCACGGCCAATGTTAATGCACTTT | 15562 |
| gb:MT039888 | Organism:Severe | CTTATGCTAATAGTGTTTTTAACATTTGTCAAGCTGTCACGGCCAATGTTAATGCACTTT | 15562 |
| gb:LC522972 | Organism:Severe | CTTATGCTAATAGTGTTTTTAACATTTGTCAAGCTGTCACGGCCAATGTTAATGCACTTT | 15559 |
| gb:MT027063 | Organism:Severe | CTTATGCTAATAGTGTTTTTAACATTTGTCAAGCTGTCACGGCCAATGTTAATGCACTTT | 15562 |
| gb:MT027062 | Organism:Severe | CTTATGCTAATAGTGTTTTTAACATTTGTCAAGCTGTCACGGCCAATGTTAATGCACTTT | 15562 |
| gb:MT019529 | Organism:Severe | CTTATGCTAATAGTGTTTTTAACATTTGTCAAGCTGTCACGGCCAATGTTAATGCACTTT | 15562 |
| gb:MN996529 | Organism:Severe | CTTATGCTAATAGTGTTTTTAACATTTGTCAAGCTGTCACGGCCAATGTTAATGCACTTT | 15550 |
| gb:MN996531 | Organism:Severe | CTTATGCTAATAGTGTTTTTAACATTTGTCAAGCTGTCACGGCCAATGTTAATGCACTTT | 15549 |
| gb:MT066176 | Organism:Severe | CTTATGCTAATAGTGTTTTTAACATTTGTCAAGCTGTCACGGCCAATGTTAATGCACTTT | 15562 |
| gb:MT027064 | Organism:Severe | CTTATGCTAATAGTGTTTTTAACATTTGTCAAGCTGTCACGGCCAATGTTAATGCACTTT | 15562 |
| gb:MN994468 | Organism:Severe | CTTATGCTAATAGTGTTTTTAACATTTGTCAAGCTGTCACGGCCAATGTTAATGCACTTT | 15562 |
| gb:MT072688 | Organism:Severe | CTTATGCTAATAGTGTTTTTAACATTTGTCAAGCTGTCACGGCCAATGTTAATGCACTTT | 15547 |
| gb:MN996527 | Organism:Severe | CTTATGCTAATAGTGTTTTTAACATTTGTCAAGCTGTCACGGCCAATGTTAATGCACTTT | 15529 |
| gb:MT093631 | Organism:Severe | CTTATGCTAATAGTGTTTTTAACATTTGTCAAGCTGTCACGGCCAATGTTAATGCACTTT | 15600 |
| gb:MT106053 | Organism:Severe | CTTATGCTAATAGTGTTTTTAACATTTGTCAAGCTGTCACGGCCAATGTTAATGCACTTT | 15562 |
| gb:MT019533 | Organism:Severe | CTTATGCTAATAGTGTTTTTAACATTTGTCAAGCTGTCACGGCCAATGTTAATGCACTTT | 15562 |
| gb:MT019531 | Organism:Severe | CTTATGCTAATAGTGTTTTTAACATTTGTCAAGCTGTCACGGCCAATGTTAATGCACTTT | 15562 |
| gb:MN996528 | Organism:Severe | CTTATGCTAATAGTGTTTTTAACATTTGTCAAGCTGTCACGGCCAATGTTAATGCACTTT | 15562 |
| gb:MN996530 | Organism:Severe | CTTATGCTAATAGTGTTTTTAACATTTGTCAAGCTGTCACGGCCAATGTTAATGCACTTT | 15548 |

|             |                 |                                                              |       |
|-------------|-----------------|--------------------------------------------------------------|-------|
| gb:MN908947 | Organism:Severe | CTTATGCTAATAGTGTTTTTAACATTTGTCAAGCTGTCACGGCCAATGTTAATGCACTTT | 15562 |
| gb:MT019532 | Organism:Severe | CTTATGCTAATAGTGTTTTTAACATTTGTCAAGCTGTCACGGCCAATGTTAATGCACTTT | 15562 |

\*\*\*\*\*

|             |                 |                                                              |       |
|-------------|-----------------|--------------------------------------------------------------|-------|
| gb:MT020781 | Organism:Severe | TATCTACTGATGGTAACAAAATTGCCGATAAGTATGTCCGCAATTTACAACACAGACTTT | 15610 |
| gb:MT007544 | Organism:Severe | TATCTACTGATGGTAACAAAATTGCCGATAAGTATGTCCGCAATTTACAACACAGACTTT | 15622 |
| gb:MN994467 | Organism:Severe | TATCTACTGATGGTAACAAAATTGCCGATAAGTATGTCCGCAATTTACAACACAGACTTT | 15622 |
| gb:MT044257 | Organism:Severe | TATCTACTGATGGTAACAAAATTGCCGATAAGTATGTCCGCAATTTACAACACAGACTTT | 15622 |
| gb:MT106054 | Organism:Severe | TATCTACTGATGGTAACAAAATTGCCGATAAGTATGTCCGCAATTTACAACACAGACTTT | 15622 |
| gb:MT049951 | Organism:Severe | TATCTACTGATGGTAACAAAATTGCCGATAAGTATGTCCGCAATTTACAACACAGACTTT | 15622 |
| gb:MN975262 | Organism:Severe | TATCTACTGATGGTAACAAAATTGCCGATAAGTATGTCCGCAATTTACAACACAGACTTT | 15622 |
| gb:MT106052 | Organism:Severe | TATCTACTGATGGTAACAAAATTGCCGATAAGTATGTCCGCAATTTACAACACAGACTTT | 15622 |
| gb:LC522975 | Organism:Severe | TATCTACTGATGGTAACAAAATTGCCGATAAGTATGTCCGCAATTTACAACACAGACTTT | 15619 |
| gb:LC522973 | Organism:Severe | TATCTACTGATGGTAACAAAATTGCCGATAAGTATGTCCGCAATTTACAACACAGACTTT | 15619 |
| gb:LC522974 | Organism:Severe | TATCTACTGATGGTAACAAAATTGCCGATAAGTATGTCCGCAATTTACAACACAGACTTT | 15619 |
| gb:MN985325 | Organism:Severe | TATCTACTGATGGTAACAAAATTGCCGATAAGTATGTCCGCAATTTACAACACAGACTTT | 15622 |
| gb:MT020881 | Organism:Severe | TATCTACTGATGGTAACAAAATTGCCGATAAGTATGTCCGCAATTTACAACACAGACTTT | 15622 |
| gb:MT020880 | Organism:Severe | TATCTACTGATGGTAACAAAATTGCCGATAAGTATGTCCGCAATTTACAACACAGACTTT | 15622 |
| gb:MT066175 | Organism:Severe | TATCTACTGATGGTAACAAAATTGCCGATAAGTATGTCCGCAATTTACAACACAGACTTT | 15622 |
| gb:MN997409 | Organism:Severe | TATCTACTGATGGTAACAAAATTGCCGATAAGTATGTCCGCAATTTACAACACAGACTTT | 15622 |
| gb:MN938384 | Organism:Severe | TATCTACTGATGGTAACAAAATTGCCGATAAGTATGTCCGCAATTTACAACACAGACTTT | 15590 |
| gb:MT044258 | Organism:Severe | TATCTACTGATGGTAACAAAATTGCCGATAAGTATGTCCGCAATTTACAACACAGACTTT | 15598 |
| gb:MT039890 | Organism:Severe | TATCTACTGATGGTAACAAAATTGCCGATAAGTACGTCCGCAATTTACAACACAGACTTT | 15622 |
| gb:MN988713 | Organism:Severe | TATCTACTGATGGTAACAAAATTGCCGATAAGTATGTCCGCAATTTACAACACAGACTTT | 15622 |
| gb:LC521925 | Organism:Severe | TATCTACTGATGGTAACAAAATTGCCGATAAGTATGTCCGCAATTTACAACACAGACTTT | 15595 |
| gb:MT093571 | Organism:Severe | TATCTACTGATGGTAACAAAATTGCCGATAAGTATGTCCGCAATTTACAACACAGACTTT | 15622 |
| gb:MT039887 | Organism:Severe | TATCTACTGATGGTAACAAAATTGCCGATAAGTATGTCCGCAATTTACAACACAGACTTT | 15622 |
| gb:MT019530 | Organism:Severe | TATCTACTGATGGTAACAAAATTGCCGATAAGTATGTCCGCAATTTACAACACAGACTTT | 15622 |
| gb:MT039888 | Organism:Severe | TATCTACTGATGGTAACAAAATTGCCGATAAGTATGTCCGCAATTTACAACACAGACTTT | 15622 |
| gb:LC522972 | Organism:Severe | TATCTACTGATGGTAACAAAATTGCCGATAAGTATGTCCGCAATTTACAACACAGACTTT | 15619 |
| gb:MT027063 | Organism:Severe | TATCTACTGATGGTAACAAAATTGCCGATAAGTATGTCCGCAATTTACAACACAGACTTT | 15622 |
| gb:MT027062 | Organism:Severe | TATCTACTGATGGTAACAAAATTGCCGATAAGTATGTCCGCAATTTACAACACAGACTTT | 15622 |
| gb:MT019529 | Organism:Severe | TATCTACTGATGGTAACAAAATTGCCGATAAGTATGTCCGCAATTTACAACACAGACTTT | 15622 |
| gb:MN996529 | Organism:Severe | TATCTACTGATGGTAACAAAATTGCCGATAAGTATGTCCGCAATTTACAACACAGACTTT | 15610 |
| gb:MN996531 | Organism:Severe | TATCTACTGATGGTAACAAAATTGCCGATAAGTATGTCCGCAATTTACAACACAGACTTT | 15609 |
| gb:MT066176 | Organism:Severe | TATCTACTGATGGTAACAAAATTGCCGATAAGTATGTCCGCAATTTACAACACAGACTTT | 15622 |
| gb:MT027064 | Organism:Severe | TATCTACTGATGGTAACAAAATTGCCGATAAGTATGTCCGCAATTTACAACACAGACTTT | 15622 |
| gb:MN994468 | Organism:Severe | TATCTACTGATGGTAACAAAATTGCCGATAAGTATGTCCGCAATTTACAACACAGACTTT | 15622 |
| gb:MT072688 | Organism:Severe | TATCTACTGATGGTAACAAAATTGCCGATAAGTATGTCCGCAATTTACAACACAGACTTT | 15607 |
| gb:MN996527 | Organism:Severe | TATCTACTGATGGTAACAAAATTGCCGATAAGTATGTCCGCAATTTACAACACAGACTTT | 15589 |
| gb:MT093631 | Organism:Severe | TATCTACTGATGGTAACAAAATTGCCGATAAGTATGTCCGCAATTTACAACACAGACTTT | 15660 |
| gb:MT106053 | Organism:Severe | TATCTACTGATGGTAACAAAATTGCCGATAAGTATGTCCGCAATTTACAACACAGACTTT | 15622 |
| gb:MT019533 | Organism:Severe | TATCTACTGATGGTAACAAAATTGCCGATAAGTATGTCCGCAATTTACAACACAGACTTT | 15622 |
| gb:MT019531 | Organism:Severe | TATCTACTGATGGTAACAAAATTGCCGATAAGTATGTCCGCAATTTACAACACAGACTTT | 15622 |
| gb:MN996528 | Organism:Severe | TATCTACTGATGGTAACAAAATTGCCGATAAGTATGTCCGCAATTTACAACACAGACTTT | 15622 |
| gb:MN996530 | Organism:Severe | TATCTACTGATGGTAACAAAATTGCCGATAAGTATGTCCGCAATTTACAACACAGACTTT | 15608 |
| gb:MN908947 | Organism:Severe | TATCTACTGATGGTAACAAAATTGCCGATAAGTATGTCCGCAATTTACAACACAGACTTT | 15622 |
| gb:MT019532 | Organism:Severe | TATCTACTGATGGTAACAAAATTGCCGATAAGTATGTCCGCAATTTACAACACAGACTTT | 15622 |

\*\*\*\*\*

|             |                 |                                                              |       |
|-------------|-----------------|--------------------------------------------------------------|-------|
| gb:MT020781 | Organism:Severe | ATGAGTGTCTCTATAGAAATAGAGATGTTGACACAGACTTTGTGAATGAGTTTTACGCAT | 15670 |
| gb:MT007544 | Organism:Severe | ATGAGTGTCTCTATAGAAATAGAGATGTTGACACAGACTTTGTGAATGAGTTTTACGCAT | 15682 |
| gb:MN994467 | Organism:Severe | ATGAGTGTCTCTATAGAAATAGAGATGTTGACACAGACTTTGTGAATGAGTTTTACGCAT | 15682 |
| gb:MT044257 | Organism:Severe | ATGAGTGTCTCTATAGAAATAGAGATGTTGACACAGACTTTGTGAATGAGTTTTACGCAT | 15682 |
| gb:MT106054 | Organism:Severe | ATGAGTGTCTCTATAGAAATAGAGATGTTGACACAGACTTTGTGAATGAGTTTTACGCAT | 15682 |
| gb:MT049951 | Organism:Severe | ATGAGTGTCTCTATAGAAATAGAGATGTTGACACAGACTTTGTGAATGAGTTTTACGCAT | 15682 |
| gb:MN975262 | Organism:Severe | ATGAGTGTCTCTATAGAAATAGAGATGTTGACACAGACTTTGTGAATGAGTTTTACGCAT | 15682 |
| gb:MT106052 | Organism:Severe | ATGAGTGTCTCTATAGAAATAGAGATGTTGACACAGACTTTGTGAATGAGTTTTACGCAT | 15682 |
| gb:LC522975 | Organism:Severe | ATGAGTGTCTCTATAGAAATAGAGATGTTGACACAGACTTTGTGAATGAGTTTTACGCAT | 15679 |
| gb:LC522973 | Organism:Severe | ATGAGTGTCTCTATAGAAATAGAGATGTTGACACAGACTTTGTGAATGAGTTTTACGCAT | 15679 |
| gb:LC522974 | Organism:Severe | ATGAGTGTCTCTATAGAAATAGAGATGTTGACACAGACTTTGTGAATGAGTTTTACGCAT | 15679 |
| gb:MN985325 | Organism:Severe | ATGAGTGTCTCTATAGAAATAGAGATGTTGACACAGACTTTGTGAATGAGTTTTACGCAT | 15682 |
| gb:MT020881 | Organism:Severe | ATGAGTGTCTCTATAGAAATAGAGATGTTGACACAGACTTTGTGAATGAGTTTTACGCAT | 15682 |
| gb:MT020880 | Organism:Severe | ATGAGTGTCTCTATAGAAATAGAGATGTTGACACAGACTTTGTGAATGAGTTTTACGCAT | 15682 |
| gb:MT066175 | Organism:Severe | ATGAGTGTCTCTATAGAAATAGAGATGTTGACACAGACTTTGTGAATGAGTTTTACGCAT | 15682 |

|             |                 |                                                               |       |
|-------------|-----------------|---------------------------------------------------------------|-------|
| gb:MN997409 | Organism:Severe | ATGAGTGTCTCTATAGAAAATAGAGATGTTGACACAGACTTTGTGAATGAGTTTTACGCAT | 15682 |
| gb:MN938384 | Organism:Severe | ATGAGTGTCTCTATAGAAAATAGAGATGTTGACACAGACTTTGTGAATGAGTTTTACGCAT | 15650 |
| gb:MT044258 | Organism:Severe | ATGAGTGTCTCTATAGAAAATAGAGATGTTGACACAGACTTTGTGAATGAGTTTTACGCAT | 15658 |
| gb:MT039890 | Organism:Severe | ATGAGTGTCTCTATAGAAAATAGAGATGTTGACACAGACTTTGTGAATGAGTTTTACGCAT | 15682 |
| gb:MN988713 | Organism:Severe | ATGAGTGTCTCTATAGAAAATAGAGATGTTGACACAGACTTTGTGAATGAGTTTTACGCAT | 15682 |
| gb:LC521925 | Organism:Severe | ATGAGTGTCTCTATAGAAAATAGAGATGTTGACACAGACTTTGTGAATGAGTTTTACGCAT | 15655 |
| gb:MT093571 | Organism:Severe | ATGAGTGTCTCTATAGAAAATAGAGATGTTGACACAGACTTTGTGAATGAGTTTTACGCAT | 15682 |
| gb:MT039887 | Organism:Severe | ATGAGTGTCTCTATAGAAAATAGAGATGTTGACACAGACTTTGTGAATGAGTTTTACGCAT | 15682 |
| gb:MT019530 | Organism:Severe | ATGAGTGTCTCTATAGAAAATAGAGATGTTGACACAGACTTTGTGAATGAGTTTTACGCAT | 15682 |
| gb:MT039888 | Organism:Severe | ATGAGTGTCTCTATAGAAAATAGAGATGTTGACACAGACTTTGTGAATGAGTTTTACGCAT | 15682 |
| gb:LC522972 | Organism:Severe | ATGAGTGTCTCTATAGAAAATAGAGATGTTGACACAGACTTTGTGAATGAGTTTTACGCAT | 15679 |
| gb:MT027063 | Organism:Severe | ATGAGTGTCTCTATAGAAAATAGAGATGTTGACACAGACTTTGTGAATGAGTTTTACGCAT | 15682 |
| gb:MT027062 | Organism:Severe | ATGAGTGTCTCTATAGAAAATAGAGATGTTGACACAGACTTTGTGAATGAGTTTTACGCAT | 15682 |
| gb:MT019529 | Organism:Severe | ATGAGTGTCTCTATAGAAAATAGAGATGTTGACACAGACTTTGTGAATGAGTTTTACGCAT | 15682 |
| gb:MN996529 | Organism:Severe | ATGAGTGTCTCTATAGAAAATAGAGATGTTGACACAGACTTTGTGAATGAGTTTTACGCAT | 15670 |
| gb:MN996531 | Organism:Severe | ATGAGTGTCTCTATAGAAAATAGAGATGTTGACACAGACTTTGTGAATGAGTTTTACGCAT | 15669 |
| gb:MT066176 | Organism:Severe | ATGAGTGTCTCTATAGAAAATAGAGATGTTGACACAGACTTTGTGAATGAGTTTTACGCAT | 15682 |
| gb:MT027064 | Organism:Severe | ATGAGTGTCTCTATAGAAAATAGAGATGTTGACACAGACTTTGTGAATGAGTTTTACGCAT | 15682 |
| gb:MN994468 | Organism:Severe | ATGAGTGTCTCTATAGAAAATAGAGATGTTGACACAGACTTTGTGAATGAGTTTTACGCAT | 15682 |
| gb:MT072688 | Organism:Severe | ATGAGTGTCTCTATAGAAAATAGAGATGTTGACACAGACTTTGTGAATGAGTTTTACGCAT | 15667 |
| gb:MN996527 | Organism:Severe | ATGAGTGTCTCTATAGAAAATAGAGATGTTGACACAGACTTTGTGAATGAGTTTTACGCAT | 15649 |
| gb:MT093631 | Organism:Severe | ATGAGTGTCTCTATAGAAAATAGAGATGTTGACACAGACTTTGTGAATGAGTTTTACGCAT | 15720 |
| gb:MT106053 | Organism:Severe | ATGAGTGTCTCTATAGAAAATAGAGATGTTGACACAGACTTTGTGAATGAGTTTTACGCAT | 15682 |
| gb:MT019533 | Organism:Severe | ATGAGTGTCTCTATAGAAAATAGAGATGTTGACACAGACTTTGTGAATGAGTTTTACGCAT | 15682 |
| gb:MT019531 | Organism:Severe | ATGAGTGTCTCTATAGAAAATAGAGATGTTGACACAGACTTTGTGAATGAGTTTTACGCAT | 15682 |
| gb:MN996528 | Organism:Severe | ATGAGTGTCTCTATAGAAAATAGAGATGTTGACACAGACTTTGTGAATGAGTTTTACGCAT | 15682 |
| gb:MN996530 | Organism:Severe | ATGAGTGTCTCTATAGAAAATAGAGATGTTGACACAGACTTTGTGAATGAGTTTTACGCAT | 15668 |
| gb:MN908947 | Organism:Severe | ATGAGTGTCTCTATAGAAAATAGAGATGTTGACACAGACTTTGTGAATGAGTTTTACGCAT | 15682 |
| gb:MT019532 | Organism:Severe | ATGAGTGTCTCTATAGAAAATAGAGATGTTGACACAGACTTTGTGAATGAGTTTTACGCAT | 15682 |

\*\*\*\*\*

|             |                 |                                                              |       |
|-------------|-----------------|--------------------------------------------------------------|-------|
| gb:MT020781 | Organism:Severe | ATTTGCGTAAACATTTCTCAATGATGATACTCTCTGACGATGCTGTTGTGTGTTTCAATA | 15730 |
| gb:MT007544 | Organism:Severe | ATTTGCGTAAACATTTCTCAATGATGATACTCTCTGACGATGCTGTTGTGTGTTTCAATA | 15742 |
| gb:MN994467 | Organism:Severe | ATTTGCGTAAACATTTCTCAATGATGATACTCTCTGACGATGCTGTTGTGTGTTTCAATA | 15742 |
| gb:MT044257 | Organism:Severe | ATTTGCGTAAACATTTCTCAATGATGATACTCTCTGACGATGCTGTTGTGTGTTTCAATA | 15742 |
| gb:MT106054 | Organism:Severe | ATTTGCGTAAACATTTCTCAATGATGATACTCTCTGACGATGCTGTTGTGTGTTTCAATA | 15742 |
| gb:MT049951 | Organism:Severe | ATTTGCGTAAACATTTCTCAATGATGATACTCTCTGACGATGCTGTTGTGTGTTTCAATA | 15742 |
| gb:MN975262 | Organism:Severe | ATTTGCGTAAACATTTCTCAATGATGATACTCTCTGACGATGCTGTTGTGTGTTTCAATA | 15742 |
| gb:MT106052 | Organism:Severe | ATTTGCGTAAACATTTCTCAATGATGATACTCTCTGACGATGCTGTTGTGTGTTTCAATA | 15742 |
| gb:LC522975 | Organism:Severe | ATTTGCGTAAACATTTCTCAATGATGATACTCTCTGACGATGCTGTTGTGTGTTTCAATA | 15739 |
| gb:LC522973 | Organism:Severe | ATTTGCGTAAACATTTCTCAATGATGATACTCTCTGACGATGCTGTTGTGTGTTTCAATA | 15739 |
| gb:LC522974 | Organism:Severe | ATTTGCGTAAACATTTCTCAATGATGATACTCTCTGACGATGCTGTTGTGTGTTTCAATA | 15739 |
| gb:MN985325 | Organism:Severe | ATTTGCGTAAACATTTCTCAATGATGATACTCTCTGACGATGCTGTTGTGTGTTTCAATA | 15742 |
| gb:MT020881 | Organism:Severe | ATTTGCGTAAACATTTCTCAATGATGATACTCTCTGACGATGCTGTTGTGTGTTTCAATA | 15742 |
| gb:MT020880 | Organism:Severe | ATTTGCGTAAACATTTCTCAATGATGATACTCTCTGACGATGCTGTTGTGTGTTTCAATA | 15742 |
| gb:MT066175 | Organism:Severe | ATTTGCGTAAACATTTCTCAATGATGATACTCTCTGACGATGCTGTTGTGTGTTTCAATA | 15742 |
| gb:MN997409 | Organism:Severe | ATTTGCGTAAACATTTCTCAATGATGATACTCTCTGACGATGCTGTTGTGTGTTTCAATA | 15742 |
| gb:MN938384 | Organism:Severe | ATTTGCGTAAACATTTCTCAATGATGATACTCTCTGACGATGCTGTTGTGTGTTTCAATA | 15710 |
| gb:MT044258 | Organism:Severe | ATTTGCGTAAACATTTCTCAATGATGATACTCTCTGACGATGCTGTTGTGTGTTTCAATA | 15718 |
| gb:MT039890 | Organism:Severe | ATTTGCGTAAACATTTCTCAATGATGATACTCTCTGACGATGCTGTTGTGTGTTTCAATA | 15742 |
| gb:MN988713 | Organism:Severe | ATTTGCGTAAACATTTCTCAATGATGATACTCTCTGACGATGCTGTTGTGTGTTTCAATA | 15742 |
| gb:LC521925 | Organism:Severe | ATTTGCGTAAACATTTCTCAATGATGATACTCTCTGACGATGCTGTTGTGTGTTTCAATA | 15715 |
| gb:MT093571 | Organism:Severe | ATTTGCGTAAACATTTCTCAATGATGATACTCTCTGACGATGCTGTTGTGTGTTTCAATA | 15742 |
| gb:MT039887 | Organism:Severe | ATTTGCGTAAACATTTCTCAATGATGATACTCTCTGACGATGCTGTTGTGTGTTTCAATA | 15742 |
| gb:MT019530 | Organism:Severe | ATTTGCGTAAACATTTCTCAATGATGATACTCTCTGACGATGCTGTTGTGTGTTTCAATA | 15742 |
| gb:MT039888 | Organism:Severe | ATTTGCGTAAACATTTCTCAATGATGATACTCTCTGACGATGCTGTTGTGTGTTTCAATA | 15742 |
| gb:LC522972 | Organism:Severe | ATTTGCGTAAACATTTCTCAATGATGATACTCTCTGACGATGCTGTTGTGTGTTTCAATA | 15739 |
| gb:MT027063 | Organism:Severe | ATTTGCGTAAACATTTCTCAATGATGATACTCTCTGACGATGCTGTTGTGTGTTTCAATA | 15742 |
| gb:MT027062 | Organism:Severe | ATTTGCGTAAACATTTCTCAATGATGATACTCTCTGACGATGCTGTTGTGTGTTTCAATA | 15742 |
| gb:MT019529 | Organism:Severe | ATTTGCGTAAACATTTCTCAATGATGATACTCTCTGACGATGCTGTTGTGTGTTTCAATA | 15742 |
| gb:MN996529 | Organism:Severe | ATTTGCGTAAACATTTCTCAATGATGATACTCTCTGACGATGCTGTTGTGTGTTTCAATA | 15730 |
| gb:MN996531 | Organism:Severe | ATTTGCGTAAACATTTCTCAATGATGATACTCTCTGACGATGCTGTTGTGTGTTTCAATA | 15729 |
| gb:MT066176 | Organism:Severe | ATTTGCGTAAACATTTCTCAATGATGATACTCTCTGACGATGCTGTTGTGTGTTTCAATA | 15742 |
| gb:MT027064 | Organism:Severe | ATTTGCGTAAACATTTCTCAATGATGATACTCTCTGACGATGCTGTTGTGTGTTTCAATA | 15742 |
| gb:MN994468 | Organism:Severe | ATTTGCGTAAACATTTCTCAATGATGATACTCTCTGACGATGCTGTTGTGTGTTTCAATA | 15742 |

|             |                 |                                                              |       |
|-------------|-----------------|--------------------------------------------------------------|-------|
| gb:MT072688 | Organism:Severe | ATTTGCGTAAACATTTCTCAATGATGATACTCTCTGACGATGCTGTTGTGTGTTTCAATA | 15727 |
| gb:MN996527 | Organism:Severe | ATTTGCGTAAACATTTCTCAATGATGATACTCTCTGACGATGCTGTTGTGTGTTTCAATA | 15709 |
| gb:MT093631 | Organism:Severe | ATTTGCGTAAACATTTCTCAATGATGATACTCTCTGACGATGCTGTTGTGTGTTTCAATA | 15780 |
| gb:MT106053 | Organism:Severe | ATTTGCGTAAACATTTCTCAATGATGATACTCTCTGACGATGCTGTTGTGTGTTTCAATA | 15742 |
| gb:MT019533 | Organism:Severe | ATTTGCGTAAACATTTCTCAATGATGATACTCTCTGACGATGCTGTTGTGTGTTTCAATA | 15742 |
| gb:MT019531 | Organism:Severe | ATTTGCGTAAACATTTCTCAATGATGATACTCTCTGACGATGCTGTTGTGTGTTTCAATA | 15742 |
| gb:MN996528 | Organism:Severe | ATTTGCGTAAACATTTCTCAATGATGATACTCTCTGACGATGCTGTTGTGTGTTTCAATA | 15742 |
| gb:MN996530 | Organism:Severe | ATTTGCGTAAACATTTCTCAATGATGATACTCTCTGACGATGCTGTTGTGTGTTTCAATA | 15728 |
| gb:MN908947 | Organism:Severe | ATTTGCGTAAACATTTCTCAATGATGATACTCTCTGACGATGCTGTTGTGTGTTTCAATA | 15742 |
| gb:MT019532 | Organism:Severe | ATTTGCGTAAACATTTCTCAATGATGATACTCTCTGACGATGCTGTTGTGTGTTTCAATA | 15742 |

\*\*\*\*\*

|             |                 |                                                                |       |
|-------------|-----------------|----------------------------------------------------------------|-------|
| gb:MT020781 | Organism:Severe | GCAC TTATGCATCTCAAGGCTAGTGGCTAGCATAAAGA AACTTTAAGTCAGTTCTTTATT | 15790 |
| gb:MT007544 | Organism:Severe | GCAC TTATGCATCTCAAGGCTAGTGGCTAGCATAAAGA AACTTTAAGTCAGTTCTTTATT | 15802 |
| gb:MN994467 | Organism:Severe | GCAC TTATGCATCTCAAGGCTAGTGGCTAGCATAAAGA AACTTTAAGTCAGTTCTTTATT | 15802 |
| gb:MT044257 | Organism:Severe | GCAC TTATGCATCTCAAGGCTAGTGGCTAGCATAAAGA AACTTTAAGTCAGTTCTTTATT | 15802 |
| gb:MT106054 | Organism:Severe | GCAC TTATGCATCTCAAGGCTAGTGGCTAGCATAAAGA AACTTTAAGTCAGTTCTTTATT | 15802 |
| gb:MT049951 | Organism:Severe | GCAC TTATGCATCTCAAGGCTAGTGGCTAGCATAAAGA AACTTTAAGTCAGTTCTTTATT | 15802 |
| gb:MN975262 | Organism:Severe | GCAC TTATGCATCTCAAGGCTAGTGGCTAGCATAAAGA AACTTTAAGTCAGTTCTTTATT | 15802 |
| gb:MT106052 | Organism:Severe | GCAC TTATGCATCTCAAGGCTAGTGGCTAGCATAAAGA AACTTTAAGTCAGTTCTTTATT | 15802 |
| gb:LC522975 | Organism:Severe | GCAC TTATGCATCTCAAGGCTAGTGGCTAGCATAAAGA AACTTTAAGTCAGTTCTTTATT | 15799 |
| gb:LC522973 | Organism:Severe | GCAC TTATGCATCTCAAGGCTAGTGGCTAGCATAAAGA AACTTTAAGTCAGTTCTTTATT | 15799 |
| gb:LC522974 | Organism:Severe | GCAC TTATGCATCTCAAGGCTAGTGGCTAGCATAAAGA AACTTTAAGTCAGTTCTTTATT | 15799 |
| gb:MN985325 | Organism:Severe | GCAC TTATGCATCTCAAGGCTAGTGGCTAGCATAAAGA AACTTTAAGTCAGTTCTTTATT | 15802 |
| gb:MT020881 | Organism:Severe | GCAC TTATGCATCTCAAGGCTAGTGGCTAGCATAAAGA AACTTTAAGTCAGTTCTTTATT | 15802 |
| gb:MT020880 | Organism:Severe | GCAC TTATGCATCTCAAGGCTAGTGGCTAGCATAAAGA AACTTTAAGTCAGTTCTTTATT | 15802 |
| gb:MT066175 | Organism:Severe | GCAC TTATGCATCTCAAGGCTAGTGGCTAGCATAAAGA AACTTTAAGTCAGTTCTTTATT | 15802 |
| gb:MN997409 | Organism:Severe | GCAC TTATGCATCTCAAGGCTAGTGGCTAGCATAAAGA AACTTTAAGTCAGTTCTTTATT | 15802 |
| gb:MN938384 | Organism:Severe | GCAC TTATGCATCTCAAGGCTAGTGGCTAGCATAAAGA AACTTTAAGTCAGTTCTTTATT | 15770 |
| gb:MT044258 | Organism:Severe | GCAC TTATGCATCTCAAGGCTAGTGGCTAGCATAAAGA AACTTTAAGTCAGTTCTTTATT | 15778 |
| gb:MT039890 | Organism:Severe | GCAC TTATGCATCTCAAGGCTAGTGGCTAGCATAAAGA AACTTTAAGTCAGTTCTTTATT | 15802 |
| gb:MN988713 | Organism:Severe | GCAC TTATGCATCTCAAGGCTAGTGGCTAGCATAAAGA AACTTTAAGTCAGTTCTTTATT | 15802 |
| gb:LC521925 | Organism:Severe | GCAC TTATGCATCTCAAGGCTAGTGGCTAGCATAAAGA AACTTTAAGTCAGTTCTTTATT | 15775 |
| gb:MT093571 | Organism:Severe | GCAC TTATGCATCTCAAGGCTAGTGGCTAGCATAAAGA AACTTTAAGTCAGTTCTTTATT | 15802 |
| gb:MT039887 | Organism:Severe | GCAC TTATGCATCTCAAGGCTAGTGGCTAGCATAAAGA AACTTTAAGTCAGTTCTTTATT | 15802 |
| gb:MT019530 | Organism:Severe | GCAC TTATGCATCTCAAGGCTAGTGGCTAGCATAAAGA AACTTTAAGTCAGTTCTTTATT | 15802 |
| gb:MT039888 | Organism:Severe | GCAC TTATGCATCTCAAGGCTAGTGGCTAGCATAAAGA AACTTTAAGTCAGTTCTTTATT | 15802 |
| gb:LC522972 | Organism:Severe | GCAC TTATGCATCTCAAGGCTAGTGGCTAGCATAAAGA AACTTTAAGTCAGTTCTTTATT | 15799 |
| gb:MT027063 | Organism:Severe | GCAC TTATGCATCTCAAGGCTAGTGGCTAGCATAAAGA AACTTTAAGTCAGTTCTTTATT | 15802 |
| gb:MT027062 | Organism:Severe | GCAC TTATGCATCTCAAGGCTAGTGGCTAGCATAAAGA AACTTTAAGTCAGTTCTTTATT | 15802 |
| gb:MT019529 | Organism:Severe | GCAC TTATGCATCTCAAGGCTAGTGGCTAGCATAAAGA AACTTTAAGTCAGTTCTTTATT | 15802 |
| gb:MN996529 | Organism:Severe | GCAC TTATGCATCTCAAGGCTAGTGGCTAGCATAAAGA AACTTTAAGTCAGTTCTTTATT | 15790 |
| gb:MN996531 | Organism:Severe | GCAC TTATGCATCTCAAGGCTAGTGGCTAGCATAAAGA AACTTTAAGTCAGTTCTTTATT | 15789 |
| gb:MT066176 | Organism:Severe | GCAC TTATGCATCTCAAGGCTAGTGGCTAGCATAAAGA AACTTTAAGTCAGTTCTTTATT | 15802 |
| gb:MT027064 | Organism:Severe | GCAC TTATGCATCTCAAGGCTAGTGGCTAGCATAAAGA AACTTTAAGTCAGTTCTTTATT | 15802 |
| gb:MN994468 | Organism:Severe | GCAC TTATGCATCTCAAGGCTAGTGGCTAGCATAAAGA AACTTTAAGTCAGTTCTTTATT | 15802 |
| gb:MT072688 | Organism:Severe | GCAC TTATGCATCTCAAGGCTAGTGGCTAGCATAAAGA AACTTTAAGTCAGTTCTTTATT | 15787 |
| gb:MN996527 | Organism:Severe | GCAC TTATGCATCTCAAGGCTAGTGGCTAGCATAAAGA AACTTTAAGTCAGTTCTTTATT | 15769 |
| gb:MT093631 | Organism:Severe | GCAC TTATGCATCTCAAGGCTAGTGGCTAGCATAAAGA AACTTTAAGTCAGTTCTTTATT | 15840 |
| gb:MT106053 | Organism:Severe | GCAC TTATGCATCTCAAGGCTAGTGGCTAGCATAAAGA AACTTTAAGTCAGTTCTTTATT | 15802 |
| gb:MT019533 | Organism:Severe | GCAC TTATGCATCTCAAGGCTAGTGGCTAGCATAAAGA AACTTTAAGTCAGTTCTTTATT | 15802 |
| gb:MT019531 | Organism:Severe | GCAC TTATGCATCTCAAGGCTAGTGGCTAGCATAAAGA AACTTTAAGTCAGTTCTTTATT | 15802 |
| gb:MN996528 | Organism:Severe | GCAC TTATGCATCTCAAGGCTAGTGGCTAGCATAAAGA AACTTTAAGTCAGTTCTTTATT | 15802 |
| gb:MN996530 | Organism:Severe | GCAC TTATGCATCTCAAGGCTAGTGGCTAGCATAAAGA AACTTTAAGTCAGTTCTTTATT | 15788 |
| gb:MN908947 | Organism:Severe | GCAC TTATGCATCTCAAGGCTAGTGGCTAGCATAAAGA AACTTTAAGTCAGTTCTTTATT | 15802 |
| gb:MT019532 | Organism:Severe | GCAC TTATGCATCTCAAGGCTAGTGGCTAGCATAAAGA AACTTTAAGTCAGTTCTTTATT | 15802 |

\*\*\*\*\*

|             |                 |                                                              |       |
|-------------|-----------------|--------------------------------------------------------------|-------|
| gb:MT020781 | Organism:Severe | ATCAAAACAATGTTTTTATGTCTGAAGCAAAATGTTGGACTGAGACTGACCTTACTAAAG | 15850 |
| gb:MT007544 | Organism:Severe | ATCAAAACAATGTTTTTATGTCTGAAGCAAAATGTTGGACTGAGACTGACCTTACTAAAG | 15862 |
| gb:MN994467 | Organism:Severe | ATCAAAACAATGTTTTTATGTCTGAAGCAAAATGTTGGACTGAGACTGACCTTACTAAAG | 15862 |
| gb:MT044257 | Organism:Severe | ATCAAAACAATGTTTTTATGTCTGAAGCAAAATGTTGGACTGAGACTGACCTTACTAAAG | 15862 |
| gb:MT106054 | Organism:Severe | ATCAAAACAATGTTTTTATGTCTGAAGCAAAATGTTGGACTGAGACTGACCTTACTAAAG | 15862 |
| gb:MT049951 | Organism:Severe | ATCAAAACAATGTTTTTATGTCTGAAGCAAAATGTTGGACTGAGACTGACCTTACTAAAG | 15862 |
| gb:MN975262 | Organism:Severe | ATCAAAACAATGTTTTTATGTCTGAAGCAAAATGTTGGACTGAGACTGACCTTACTAAAG | 15862 |

|             |                 |                                                           |       |
|-------------|-----------------|-----------------------------------------------------------|-------|
| gb:MT106052 | Organism:Severe | ATCAAACAATGTTTTATGTCTGAAGCAAATGTTGGACTGAGACTGACCTTACTAAAG | 15862 |
| gb:LC522975 | Organism:Severe | ATCAAACAATGTTTTATGTCTGAAGCAAATGTTGGACTGAGACTGACCTTACTAAAG | 15859 |
| gb:LC522973 | Organism:Severe | ATCAAACAATGTTTTATGTCTGAAGCAAATGTTGGACTGAGACTGACCTTACTAAAG | 15859 |
| gb:LC522974 | Organism:Severe | ATCAAACAATGTTTTATGTCTGAAGCAAATGTTGGACTGAGACTGACCTTACTAAAG | 15859 |
| gb:MN985325 | Organism:Severe | ATCAAACAATGTTTTATGTCTGAAGCAAATGTTGGACTGAGACTGACCTTACTAAAG | 15862 |
| gb:MT020881 | Organism:Severe | ATCAAACAATGTTTTATGTCTGAAGCAAATGTTGGACTGAGACTGACCTTACTAAAG | 15862 |
| gb:MT020880 | Organism:Severe | ATCAAACAATGTTTTATGTCTGAAGCAAATGTTGGACTGAGACTGACCTTACTAAAG | 15862 |
| gb:MT066175 | Organism:Severe | ATCAAACAATGTTTTATGTCTGAAGCAAATGTTGGACTGAGACTGACCTTACTAAAG | 15862 |
| gb:MN997409 | Organism:Severe | ATCAAACAATGTTTTATGTCTGAAGCAAATGTTGGACTGAGACTGACCTTACTAAAG | 15862 |
| gb:MN938384 | Organism:Severe | ATCAAACAATGTTTTATGTCTGAAGCAAATGTTGGACTGAGACTGACCTTACTAAAG | 15830 |
| gb:MT044258 | Organism:Severe | ATCAAACAATGTTTTATGTCTGAAGCAAATGTTGGACTGAGACTGACCTTACTAAAG | 15838 |
| gb:MT039890 | Organism:Severe | ATCAAACAATGTTTTATGTCTGAAGCAAATGTTGGACTGAGACTGACCTTACTAAAG | 15862 |
| gb:MN988713 | Organism:Severe | ATCAAACAATGTTTTATGTCTGAAGCAAATGTTGGACTGAGACTGACCTTACTAAAG | 15862 |
| gb:LC521925 | Organism:Severe | ATCAAACAATGTTTTATGTCTGAAGCAAATGTTGGACTGAGACTGACCTTACTAAAG | 15835 |
| gb:MT093571 | Organism:Severe | ATCAAACAATGTTTTATGTCTGAAGCAAATGTTGGACTGAGACTGACCTTACTAAAG | 15862 |
| gb:MT039887 | Organism:Severe | ATCAAACAATGTTTTATGTCTGAAGCAAATGTTGGACTGAGACTGACCTTACTAAAG | 15862 |
| gb:MT019530 | Organism:Severe | ATCAAACAATGTTTTATGTCTGAAGCAAATGTTGGACTGAGACTGACCTTACTAAAG | 15862 |
| gb:MT039888 | Organism:Severe | ATCAAACAATGTTTTATGTCTGAAGCAAATGTTGGACTGAGACTGACCTTACTAAAG | 15862 |
| gb:LC522972 | Organism:Severe | ATCAAACAATGTTTTATGTCTGAAGCAAATGTTGGACTGAGACTGACCTTACTAAAG | 15859 |
| gb:MT027063 | Organism:Severe | ATCAAACAATGTTTTATGTCTGAAGCAAATGTTGGACTGAGACTGACCTTACTAAAG | 15862 |
| gb:MT027062 | Organism:Severe | ATCAAACAATGTTTTATGTCTGAAGCAAATGTTGGACTGAGACTGACCTTACTAAAG | 15862 |
| gb:MT019529 | Organism:Severe | ATCAAACAATGTTTTATGTCTGAAGCAAATGTTGGACTGAGACTGACCTTACTAAAG | 15862 |
| gb:MN996529 | Organism:Severe | ATCAAACAATGTTTTATGTCTGAAGCAAATGTTGGACTGAGACTGACCTTACTAAAG | 15850 |
| gb:MN996531 | Organism:Severe | ATCAAACAATGTTTTATGTCTGAAGCAAATGTTGGACTGAGACTGACCTTACTAAAG | 15849 |
| gb:MT066176 | Organism:Severe | ATCAAACAATGTTTTATGTCTGAAGCAAATGTTGGACTGAGACTGACCTTACTAAAG | 15862 |
| gb:MT027064 | Organism:Severe | ATCAAACAATGTTTTATGTCTGAAGCAAATGTTGGACTGAGACTGACCTTACTAAAG | 15862 |
| gb:MN994468 | Organism:Severe | ATCAAACAATGTTTTATGTCTGAAGCAAATGTTGGACTGAGACTGACCTTACTAAAG | 15862 |
| gb:MT072688 | Organism:Severe | ATCAAACAATGTTTTATGTCTGAAGCAAATGTTGGACTGAGACTGACCTTACTAAAG | 15847 |
| gb:MN996527 | Organism:Severe | ATCAAACAATGTTTTATGTCTGAAGCAAATGTTGGACTGAGACTGACCTTACTAAAG | 15829 |
| gb:MT093631 | Organism:Severe | ATCAAACAATGTTTTATGTCTGAAGCAAATGTTGGACTGAGACTGACCTTACTAAAG | 15900 |
| gb:MT106053 | Organism:Severe | ATCAAACAATGTTTTATGTCTGAAGCAAATGTTGGACTGAGACTGACCTTACTAAAG | 15862 |
| gb:MT019533 | Organism:Severe | ATCAAACAATGTTTTATGTCTGAAGCAAATGTTGGACTGAGACTGACCTTACTAAAG | 15862 |
| gb:MT019531 | Organism:Severe | ATCAAACAATGTTTTATGTCTGAAGCAAATGTTGGACTGAGACTGACCTTACTAAAG | 15862 |
| gb:MN996528 | Organism:Severe | ATCAAACAATGTTTTATGTCTGAAGCAAATGTTGGACTGAGACTGACCTTACTAAAG | 15862 |
| gb:MN996530 | Organism:Severe | ATCAAACAATGTTTTATGTCTGAAGCAAATGTTGGACTGAGACTGACCTTACTAAAG | 15848 |
| gb:MN908947 | Organism:Severe | ATCAAACAATGTTTTATGTCTGAAGCAAATGTTGGACTGAGACTGACCTTACTAAAG | 15862 |
| gb:MT019532 | Organism:Severe | ATCAAACAATGTTTTATGTCTGAAGCAAATGTTGGACTGAGACTGACCTTACTAAAG | 15862 |

\*\*\*\*\*

|             |                 |                                                             |       |
|-------------|-----------------|-------------------------------------------------------------|-------|
| gb:MT020781 | Organism:Severe | GACCTCATGAATTTTGTCTCAACATACAATGCTAGTTAAACAGGGTGATGATTATGTGT | 15910 |
| gb:MT007544 | Organism:Severe | GACCTCATGAATTTTGTCTCAACATACAATGCTAGTTAAACAGGGTGATGATTATGTGT | 15922 |
| gb:MN994467 | Organism:Severe | GACCTCATGAATTTTGTCTCAACATACAATGCTAGTTAAACAGGGTGATGATTATGTGT | 15922 |
| gb:MT044257 | Organism:Severe | GACCTCATGAATTTTGTCTCAACATACAATGCTAGTTAAACAGGGTGATGATTATGTGT | 15922 |
| gb:MT106054 | Organism:Severe | GACCTCATGAATTTTGTCTCAACATACAATGCTAGTTAAACAGGGTGATGATTATGTGT | 15922 |
| gb:MT049951 | Organism:Severe | GACCTCATGAATTTTGTCTCAACATACAATGCTAGTTAAACAGGGTGATGATTATGTGT | 15922 |
| gb:MN975262 | Organism:Severe | GACCTCATGAATTTTGTCTCAACATACAATGCTAGTTAAACAGGGTGATGATTATGTGT | 15922 |
| gb:MT106052 | Organism:Severe | GACCTCATGAATTTTGTCTCAACATACAATGCTAGTTAAACAGGGTGATGATTATGTGT | 15922 |
| gb:LC522975 | Organism:Severe | GACCTCATGAATTTTGTCTCAACATACAATGCTAGTTAAACAGGGTGATGATTATGTGT | 15919 |
| gb:LC522973 | Organism:Severe | GACCTCATGAATTTTGTCTCAACATACAATGCTAGTTAAACAGGGTGATGATTATGTGT | 15919 |
| gb:LC522974 | Organism:Severe | GACCTCATGAATTTTGTCTCAACATACAATGCTAGTTAAACAGGGTGATGATTATGTGT | 15919 |
| gb:MN985325 | Organism:Severe | GACCTCATGAATTTTGTCTCAACATACAATGCTAGTTAAACAGGGTGATGATTATGTGT | 15922 |
| gb:MT020881 | Organism:Severe | GACCTCATGAATTTTGTCTCAACATACAATGCTAGTTAAACAGGGTGATGATTATGTGT | 15922 |
| gb:MT020880 | Organism:Severe | GACCTCATGAATTTTGTCTCAACATACAATGCTAGTTAAACAGGGTGATGATTATGTGT | 15922 |
| gb:MT066175 | Organism:Severe | GACCTCATGAATTTTGTCTCAACATACAATGCTAGTTAAACAGGGTGATGATTATGTGT | 15922 |
| gb:MN997409 | Organism:Severe | GACCTCATGAATTTTGTCTCAACATACAATGCTAGTTAAACAGGGTGATGATTATGTGT | 15922 |
| gb:MN938384 | Organism:Severe | GACCTCATGAATTTTGTCTCAACATACAATGCTAGTTAAACAGGGTGATGATTATGTGT | 15890 |
| gb:MT044258 | Organism:Severe | GACCTCATGAATTTTGTCTCAACATACAATGCTAGTTAAACAGGGTGATGATTATGTGT | 15898 |
| gb:MT039890 | Organism:Severe | GACCTCATGAATTTTGTCTCAACATACAATGCTAGTTAAACAGGGTGATGATTATGTGT | 15922 |
| gb:MN988713 | Organism:Severe | GACCTCATGAATTTTGTCTCAACATACAATGCTAGTTAAACAGGGTGATGATTATGTGT | 15922 |
| gb:LC521925 | Organism:Severe | GACCTCATGAATTTTGTCTCAACATACAATGCTAGTTAAACAGGGTGATGATTATGTGT | 15895 |
| gb:MT093571 | Organism:Severe | GACCTCATGAATTTTGTCTCAACATACAATGCTAGTTAAACAGGGTGATGATTATGTGT | 15922 |
| gb:MT039887 | Organism:Severe | GACCTCATGAATTTTGTCTCAACATACAATGCTAGTTAAACAGGGTGATGATTATGTGT | 15922 |
| gb:MT019530 | Organism:Severe | GACCTCATGAATTTTGTCTCAACATACAATGCTAGTTAAACAGGGTGATGATTATGTGT | 15922 |
| gb:MT039888 | Organism:Severe | GACCTCATGAATTTTGTCTCAACATACAATGCTAGTTAAACAGGGTGATGATTATGTGT | 15922 |
| gb:LC522972 | Organism:Severe | GACCTCATGAATTTTGTCTCAACATACAATGCTAGTTAAACAGGGTGATGATTATGTGT | 15919 |

|             |                 |                                                             |       |
|-------------|-----------------|-------------------------------------------------------------|-------|
| gb:MT027063 | Organism:Severe | GACCTCATGAATTTTGCCTCAACATACAATGCTAGTTAAACAGGGTGATGATTATGTGT | 15922 |
| gb:MT027062 | Organism:Severe | GACCTCATGAATTTTGCCTCAACATACAATGCTAGTTAAACAGGGTGATGATTATGTGT | 15922 |
| gb:MT019529 | Organism:Severe | GACCTCATGAATTTTGCCTCAACATACAATGCTAGTTAAACAGGGTGATGATTATGTGT | 15922 |
| gb:MN996529 | Organism:Severe | GACCTCATGAATTTTGCCTCAACATACAATGCTAGTTAAACAGGGTGATGATTATGTGT | 15910 |
| gb:MN996531 | Organism:Severe | GACCTCATGAATTTTGCCTCAACATACAATGCTAGTTAAACAGGGTGATGATTATGTGT | 15909 |
| gb:MT066176 | Organism:Severe | GACCTCATGAATTTTGCCTCAACATACAATGCTAGTTAAACAGGGTGATGATTATGTGT | 15922 |
| gb:MT027064 | Organism:Severe | GACCTCATGAATTTTGCCTCAACATACAATGCTAGTTAAACAGGGTGATGATTATGTGT | 15922 |
| gb:MN994468 | Organism:Severe | GACCTCATGAATTTTGCCTCAACATACAATGCTAGTTAAACAGGGTGATGATTATGTGT | 15922 |
| gb:MT072688 | Organism:Severe | GACCTCATGAATTTTGCCTCAACATACAATGCTAGTTAAACAGGGTGATGATTATGTGT | 15907 |
| gb:MN996527 | Organism:Severe | GACCTCATGAATTTTGCCTCAACATACAATGCTAGTTAAACAGGGTGATGATTATGTGT | 15889 |
| gb:MT093631 | Organism:Severe | GACCTCATGAATTTTGCCTCAACATACAATGCTAGTTAAACAGGGTGATGATTATGTGT | 15960 |
| gb:MT106053 | Organism:Severe | GACCTCATGAATTTTGCCTCAACATACAATGCTAGTTAAACAGGGTGATGATTATGTGT | 15922 |
| gb:MT019533 | Organism:Severe | GACCTCATGAATTTTGCCTCAACATACAATGCTAGTTAAACAGGGTGATGATTATGTGT | 15922 |
| gb:MT019531 | Organism:Severe | GACCTCATGAATTTTGCCTCAACATACAATGCTAGTTAAACAGGGTGATGATTATGTGT | 15922 |
| gb:MN996528 | Organism:Severe | GACCTCATGAATTTTGCCTCAACATACAATGCTAGTTAAACAGGGTGATGATTATGTGT | 15922 |
| gb:MN996530 | Organism:Severe | GACCTCATGAATTTTGCCTCAACATACAATGCTAGTTAAACAGGGTGATGATTATGTGT | 15908 |
| gb:MN908947 | Organism:Severe | GACCTCATGAATTTTGCCTCAACATACAATGCTAGTTAAACAGGGTGATGATTATGTGT | 15922 |
| gb:MT019532 | Organism:Severe | GACCTCATGAATTTTGCCTCAACATACAATGCTAGTTAAACAGGGTGATGATTATGTGT | 15922 |

\*\*\*\*\*

|             |                 |                                                              |       |
|-------------|-----------------|--------------------------------------------------------------|-------|
| gb:MT020781 | Organism:Severe | ACCTTCCTTACCCAGATCCATCAAGAATCCTAGGGGCCGGCTGTTTTGTAGATGATATCG | 15970 |
| gb:MT007544 | Organism:Severe | ACCTTCCTTACCCAGATCCATCAAGAATCCTAGGGGCCGGCTGTTTTGTAGATGATATCG | 15982 |
| gb:MN994467 | Organism:Severe | ACCTTCCTTACCCAGATCCATCAAGAATCCTAGGGGCCGGCTGTTTTGTAGATGATATCG | 15982 |
| gb:MT044257 | Organism:Severe | ACCTTCCTTACCCAGATCCATCAAGAATCCTAGGGGCCGGCTGTTTTGTAGATGATATCG | 15982 |
| gb:MT106054 | Organism:Severe | ACCTTCCTTACCCAGATCCATCAAGAATCCTAGGGGCCGGCTGTTTTGTAGATGATATCG | 15982 |
| gb:MT049951 | Organism:Severe | ACCTTCCTTACCCAGATCCATCAAGAATCCTAGGGGCCGGCTGTTTTGTAGATGATATCG | 15982 |
| gb:MN975262 | Organism:Severe | ACCTTCCTTACCCAGATCCATCAAGAATCCTAGGGGCCGGCTGTTTTGTAGATGATATCG | 15982 |
| gb:MT106052 | Organism:Severe | ACCTTCCTTACCCAGATCCATCAAGAATCCTAGGGGCCGGCTGTTTTGTAGATGATATCG | 15982 |
| gb:LC522975 | Organism:Severe | ACCTTCCTTACCCAGATCCATCAAGAATCCTAGGGGCCGGCTGTTTTGTAGATGATATCG | 15979 |
| gb:LC522973 | Organism:Severe | ACCTTCCTTACCCAGATCCATCAAGAATCCTAGGGGCCGGCTGTTTTGTAGATGATATCG | 15979 |
| gb:LC522974 | Organism:Severe | ACCTTCCTTACCCAGATCCATCAAGAATCCTAGGGGCCGGCTGTTTTGTAGATGATATCG | 15979 |
| gb:MN985325 | Organism:Severe | ACCTTCCTTACCCAGATCCATCAAGAATCCTAGGGGCCGGCTGTTTTGTAGATGATATCG | 15982 |
| gb:MT020881 | Organism:Severe | ACCTTCCTTACCCAGATCCATCAAGAATCCTAGGGGCCGGCTGTTTTGTAGATGATATCG | 15982 |
| gb:MT020880 | Organism:Severe | ACCTTCCTTACCCAGATCCATCAAGAATCCTAGGGGCCGGCTGTTTTGTAGATGATATCG | 15982 |
| gb:MT066175 | Organism:Severe | ACCTTCCTTACCCAGATCCATCAAGAATCCTAGGGGCCGGCTGTTTTGTAGATGATATCG | 15982 |
| gb:MN997409 | Organism:Severe | ACCTTCCTTACCCAGATCCATCAAGAATCCTAGGGGCCGGCTGTTTTGTAGATGATATCG | 15982 |
| gb:MN938384 | Organism:Severe | ACCTTCCTTACCCAGATCCATCAAGAATCCTAGGGGCCGGCTGTTTTGTAGATGATATCG | 15950 |
| gb:MT044258 | Organism:Severe | ACCTTCCTTACCCAGATCCATCAAGAATCCTAGGGGCCGGCTGTTTTGTAGATGATATCG | 15958 |
| gb:MT039890 | Organism:Severe | ACCTTCCTTACCCAGATCCATCAAGAATCCTAGGGGCCGGCTGTTTTGTAGATGATATCG | 15982 |
| gb:MN988713 | Organism:Severe | ACCTTCCTTACCCAGATCCATCAAGAATCCTAGGGGCCGGCTGTTTTGTAGATGATATCG | 15982 |
| gb:LC521925 | Organism:Severe | ACCTTCCTTACCCAGATCCATCAAGAATCCTAGGGGCCGGCTGTTTTGTAGATGATATCG | 15955 |
| gb:MT093571 | Organism:Severe | ACCTTCCTTACCCAGATCCATCAAGAATCCTAGGGGCCGGCTGTTTTGTAGATGATATCG | 15982 |
| gb:MT039887 | Organism:Severe | ACCTTCCTTACCCAGATCCATCAAGAATCCTAGGGGCCGGCTGTTTTGTAGATGATATCG | 15982 |
| gb:MT019530 | Organism:Severe | ACCTTCCTTACCCAGATCCATCAAGAATCCTAGGGGCCGGCTGTTTTGTAGATGATATCG | 15982 |
| gb:MT039888 | Organism:Severe | ACCTTCCTTACCCAGATCCATCAAGAATCCTAGGGGCCGGCTGTTTTGTAGATGATATCG | 15982 |
| gb:LC522972 | Organism:Severe | ACCTTCCTTACCCAGATCCATCAAGAATCCTAGGGGCCGGCTGTTTTGTAGATGATATCG | 15979 |
| gb:MT027063 | Organism:Severe | ACCTTCCTTACCCAGATCCATCAAGAATCCTAGGGGCCGGCTGTTTTGTAGATGATATCG | 15982 |
| gb:MT027062 | Organism:Severe | ACCTTCCTTACCCAGATCCATCAAGAATCCTAGGGGCCGGCTGTTTTGTAGATGATATCG | 15982 |
| gb:MT019529 | Organism:Severe | ACCTTCCTTACCCAGATCCATCAAGAATCCTAGGGGCCGGCTGTTTTGTAGATGATATCG | 15982 |
| gb:MN996529 | Organism:Severe | ACCTTCCTTACCCAGATCCATCAAGAATCCTAGGGGCCGGCTGTTTTGTAGATGATATCG | 15970 |
| gb:MN996531 | Organism:Severe | ACCTTCCTTACCCAGATCCATCAAGAATCCTAGGGGCCGGCTGTTTTGTAGATGATATCG | 15969 |
| gb:MT066176 | Organism:Severe | ACCTTCCTTACCCAGATCCATCAAGAATCCTAGGGGCCGGCTGTTTTGTAGATGATATCG | 15982 |
| gb:MT027064 | Organism:Severe | ACCTTCCTTACCCAGATCCATCAAGAATCCTAGGGGCCGGCTGTTTTGTAGATGATATCG | 15982 |
| gb:MN994468 | Organism:Severe | ACCTTCCTTACCCAGATCCATCAAGAATCCTAGGGGCCGGCTGTTTTGTAGATGATATCG | 15982 |
| gb:MT072688 | Organism:Severe | ACCTTCCTTACCCAGATCCATCAAGAATCCTAGGGGCCGGCTGTTTTGTAGATGATATCG | 15967 |
| gb:MN996527 | Organism:Severe | ACCTTCCTTACCCAGATCCATCAAGAATCCTAGGGGCCGGCTGTTTTGTAGATGATATCG | 15949 |
| gb:MT093631 | Organism:Severe | ACCTTCCTTACCCAGATCCATCAAGAATCCTAGGGGCCGGCTGTTTTGTAGATGATATCG | 16020 |
| gb:MT106053 | Organism:Severe | ACCTTCCTTACCCAGATCCATCAAGAATCCTAGGGGCCGGCTGTTTTGTAGATGATATCG | 15982 |
| gb:MT019533 | Organism:Severe | ACCTTCCTTACCCAGATCCATCAAGAATCCTAGGGGCCGGCTGTTTTGTAGATGATATCG | 15982 |
| gb:MT019531 | Organism:Severe | ACCTTCCTTACCCAGATCCATCAAGAATCCTAGGGGCCGGCTGTTTTGTAGATGATATCG | 15982 |
| gb:MN996528 | Organism:Severe | ACCTTCCTTACCCAGATCCATCAAGAATCCTAGGGGCCGGCTGTTTTGTAGATGATATCG | 15982 |
| gb:MN996530 | Organism:Severe | ACCTTCCTTACCCAGATCCATCAAGAATCCTAGGGGCCGGCTGTTTTGTAGATGATATCG | 15968 |
| gb:MN908947 | Organism:Severe | ACCTTCCTTACCCAGATCCATCAAGAATCCTAGGGGCCGGCTGTTTTGTAGATGATATCG | 15982 |
| gb:MT019532 | Organism:Severe | ACCTTCCTTACCCAGATCCATCAAGAATCCTAGGGGCCGGCTGTTTTGTAGATGATATCG | 15982 |

\*\*\*\*\*

|             |                 |                                                              |       |
|-------------|-----------------|--------------------------------------------------------------|-------|
| gb:MT020781 | Organism:Severe | TAAAAACAGATGGTACACTTATGATTGAACGGTTCGTGTCTTTAGCTATAGATGCTTACC | 16030 |
| gb:MT007544 | Organism:Severe | TAAAAACAGATGGTACACTTATGATTGAACGGTTCGTGTCTTTAGCTATAGATGCTTACC | 16042 |
| gb:MN994467 | Organism:Severe | TAAAAACAGATGGTACACTTATGATTGAACGGTTCGTGTCTTTAGCTATAGATGCTTACC | 16042 |
| gb:MT044257 | Organism:Severe | TAAAAACAGATGGTACACTTATGATTGAACGGTTCGTGTCTTTAGCTATAGATGCTTACC | 16042 |
| gb:MT106054 | Organism:Severe | TAAAAACAGATGGTACACTTATGATTGAACGGTTCGTGTCTTTAGCTATAGATGCTTACC | 16042 |
| gb:MT049951 | Organism:Severe | TAAAAACAGATGGTACACTTATGATTGAACGGTTCGTGTCTTTAGCTATAGATGCTTACC | 16042 |
| gb:MN975262 | Organism:Severe | TAAAAACAGATGGTACACTTATGATTGAACGGTTCGTGTCTTTAGCTATAGATGCTTACC | 16042 |
| gb:MT106052 | Organism:Severe | TAAAAACAGATGGTACACTTATGATTGAACGGTTCGTGTCTTTAGCTATAGATGCTTACC | 16042 |
| gb:LC522975 | Organism:Severe | TAAAAACAGATGGTACACTTATGATTGAACGGTTCGTGTCTTTAGCTATAGATGCTTACC | 16039 |
| gb:LC522973 | Organism:Severe | TAAAAACAGATGGTACACTTATGATTGAACGGTTCGTGTCTTTAGCTATAGATGCTTACC | 16039 |
| gb:LC522974 | Organism:Severe | TAAAAACAGATGGTACACTTATGATTGAACGGTTCGTGTCTTTAGCTATAGATGCTTACC | 16039 |
| gb:MN985325 | Organism:Severe | TAAAAACAGATGGTACACTTATGATTGAACGGTTCGTGTCTTTAGCTATAGATGCTTACC | 16042 |
| gb:MT020881 | Organism:Severe | TAAAAACAGATGGTACACTTATGATTGAACGGTTCGTGTCTTTAGCTATAGATGCTTACC | 16042 |
| gb:MT020880 | Organism:Severe | TAAAAACAGATGGTACACTTATGATTGAACGGTTCGTGTCTTTAGCTATAGATGCTTACC | 16042 |
| gb:MT066175 | Organism:Severe | TAAAAACAGATGGTACACTTATGATTGAACGGTTCGTGTCTTTAGCTATAGATGCTTACC | 16042 |
| gb:MN997409 | Organism:Severe | TAAAAACAGATGGTACACTTATGATTGAACGGTTCGTGTCTTTAGCTATAGATGCTTACC | 16042 |
| gb:MN938384 | Organism:Severe | TAAAAACAGATGGTACACTTATGATTGAACGGTTCGTGTCTTTAGCTATAGATGCTTACC | 16010 |
| gb:MT044258 | Organism:Severe | TAAAAACAGATGGTACACTTATGATTGAACGGTTCGTGTCTTTAGCTATAGATGCTTACC | 16018 |
| gb:MT039890 | Organism:Severe | TAAAAACAGATGGTACACTTATGATTGAACGGTTCGTGTCTTTAGCTATAGATGCTTACC | 16042 |
| gb:MN988713 | Organism:Severe | TAAAAACAGATGGTACACTTATGATTGAACGGTTCGTGTCTTTAGCTATAGATGCTTACC | 16042 |
| gb:LC521925 | Organism:Severe | TAAAAACAGATGGTACACTTATGATTGAACGGTTCGTGTCTTTAGCTATAGATGCTTACC | 16015 |
| gb:MT093571 | Organism:Severe | TAAAAACAGATGGTACACTTATGATTGAACGGTTCGTGTCTTTAGCTATAGATGCTTACC | 16042 |
| gb:MT039887 | Organism:Severe | TAAAAACAGATGGTACACTTATGATTGAACGGTTCGTGTCTTTAGCTATAGATGCTTACC | 16042 |
| gb:MT019530 | Organism:Severe | TAAAAACAGATGGTACACTTATGATTGAACGGTTCGTGTCTTTAGCTATAGATGCTTACC | 16042 |
| gb:MT039888 | Organism:Severe | TAAAAACAGATGGTACACTTATGATTGAACGGTTCGTGTCTTTAGCTATAGATGCTTACC | 16042 |
| gb:LC522972 | Organism:Severe | TAAAAACAGATGGTACACTTATGATTGAACGGTTCGTGTCTTTAGCTATAGATGCTTACC | 16039 |
| gb:MT027063 | Organism:Severe | TAAAAACAGATGGTACACTTATGATTGAACGGTTCGTGTCTTTAGCTATAGATGCTTACC | 16042 |
| gb:MT027062 | Organism:Severe | TAAAAACAGATGGTACACTTATGATTGAACGGTTCGTGTCTTTAGCTATAGATGCTTACC | 16042 |
| gb:MT019529 | Organism:Severe | TAAAAACAGATGGTACACTTATGATTGAACGGTTCGTGTCTTTAGCTATAGATGCTTACC | 16042 |
| gb:MN996529 | Organism:Severe | TAAAAACAGATGGTACACTTATGATTGAACGGTTCGTGTCTTTAGCTATAGATGCTTACC | 16030 |
| gb:MN996531 | Organism:Severe | TAAAAACAGATGGTACACTTATGATTGAACGGTTCGTGTCTTTAGCTATAGATGCTTACC | 16029 |
| gb:MT066176 | Organism:Severe | TAAAAACAGATGGTACACTTATGATTGAACGGTTCGTGTCTTTAGCTATAGATGCTTACC | 16042 |
| gb:MT027064 | Organism:Severe | TAAAAACAGATGGTACACTTATGATTGAACGGTTCGTGTCTTTAGCTATAGATGCTTACC | 16042 |
| gb:MN994468 | Organism:Severe | TAAAAACAGATGGTACACTTATGATTGAACGGTTCGTGTCTTTAGCTATAGATGCTTACC | 16042 |
| gb:MT072688 | Organism:Severe | TAAAAACAGATGGTACACTTATGATTGAACGGTTCGTGTCTTTAGCTATAGATGCTTACC | 16027 |
| gb:MN996527 | Organism:Severe | TAAAAACAGATGGTACACTTATGATTGAACGGTTCGTGTCTTTAGCTATAGATGCTTACC | 16009 |
| gb:MT093631 | Organism:Severe | TAAAAACAGATGGTACACTTATGATTGAACGGTTCGTGTCTTTAGCTATAGATGCTTACC | 16080 |
| gb:MT106053 | Organism:Severe | TAAAAACAGATGGTACACTTATGATTGAACGGTTCGTGTCTTTAGCTATAGATGCTTACC | 16042 |
| gb:MT019533 | Organism:Severe | TAAAAACAGATGGTACACTTATGATTGAACGGTTCGTGTCTTTAGCTATAGATGCTTACC | 16042 |
| gb:MT019531 | Organism:Severe | TAAAAACAGATGGTACACTTATGATTGAACGGTTCGTGTCTTTAGCTATAGATGCTTACC | 16042 |
| gb:MN996528 | Organism:Severe | TAAAAACAGATGGTACACTTATGATTGAACGGTTCGTGTCTTTAGCTATAGATGCTTACC | 16042 |
| gb:MN996530 | Organism:Severe | TAAAAACAGATGGTACACTTATGATTGAACGGTTCGTGTCTTTAGCTATAGATGCTTACC | 16028 |
| gb:MN908947 | Organism:Severe | TAAAAACAGATGGTACACTTATGATTGAACGGTTCGTGTCTTTAGCTATAGATGCTTACC | 16042 |
| gb:MT019532 | Organism:Severe | TAAAAACAGATGGTACACTTATGATTGAACGGTTCGTGTCTTTAGCTATAGATGCTTACC | 16042 |

\*\*\*\*\*

|             |                 |                                                             |       |
|-------------|-----------------|-------------------------------------------------------------|-------|
| gb:MT020781 | Organism:Severe | CACTTACTAAACATCCTAATCAGGAGTATGCTGATGTCTTTCATTTGACTTACAATACA | 16090 |
| gb:MT007544 | Organism:Severe | CACTTACTAAACATCCTAATCAGGAGTATGCTGATGTCTTTCATTTGACTTACAATACA | 16102 |
| gb:MN994467 | Organism:Severe | CACTTACTAAACATCCTAATCAGGAGTATGCTGATGTCTTTCATTTGACTTACAATACA | 16102 |
| gb:MT044257 | Organism:Severe | CACTTACTAAACATCCTAATCAGGAGTATGCTGATGTCTTTCATTTGACTTACAATACA | 16102 |
| gb:MT106054 | Organism:Severe | CACTTACTAAACATCCTAATCAGGAGTATGCTGATGTCTTTCATTTGACTTACAATACA | 16102 |
| gb:MT049951 | Organism:Severe | CACTTACTAAACATCCTAATCAGGAGTATGCTGATGTCTTTCATTTGACTTACAATACA | 16102 |
| gb:MN975262 | Organism:Severe | CACTTACTAAACATCCTAATCAGGAGTATGCTGATGTCTTTCATTTGACTTACAATACA | 16102 |
| gb:MT106052 | Organism:Severe | CACTTACTAAACATCCTAATCAGGAGTATGCTGATGTCTTTCATTTGACTTACAATACA | 16102 |
| gb:LC522975 | Organism:Severe | CACTTACTAAACATCCTAATCAGGAGTATGCTGATGTCTTTCATTTGACTTACAATACA | 16099 |
| gb:LC522973 | Organism:Severe | CACTTACTAAACATCCTAATCAGGAGTATGCTGATGTCTTTCATTTGACTTACAATACA | 16099 |
| gb:LC522974 | Organism:Severe | CACTTACTAAACATCCTAATCAGGAGTATGCTGATGTCTTTCATTTGACTTACAATACA | 16099 |
| gb:MN985325 | Organism:Severe | CACTTACTAAACATCCTAATCAGGAGTATGCTGATGTCTTTCATTTGACTTACAATACA | 16102 |
| gb:MT020881 | Organism:Severe | CACTTACTAAACATCCTAATCAGGAGTATGCTGATGTCTTTCATTTGACTTACAATACA | 16102 |
| gb:MT020880 | Organism:Severe | CACTTACTAAACATCCTAATCAGGAGTATGCTGATGTCTTTCATTTGACTTACAATACA | 16102 |
| gb:MT066175 | Organism:Severe | CACTTACTAAACATCCTAATCAGGAGTATGCTGATGTCTTTCATTTGACTTACAATACA | 16102 |
| gb:MN997409 | Organism:Severe | CACTTACTAAACATCCTAATCAGGAGTATGCTGATGTCTTTCATTTGACTTACAATACA | 16102 |
| gb:MN938384 | Organism:Severe | CACTTACTAAACATCCTAATCAGGAGTATGCTGATGTCTTTCATTTGACTTACAATACA | 16070 |
| gb:MT044258 | Organism:Severe | CACTTACTAAACATCCTAATCAGGAGTATGCTGATGTCTTTCATTTGACTTACAATACA | 16078 |

|             |                 |                                             |       |
|-------------|-----------------|---------------------------------------------|-------|
| gb:MT039890 | Organism:Severe | CACTTACTAAACATCCTAATCAGGAGTATGCTGATGTCTTTCA | 16102 |
| gb:MN988713 | Organism:Severe | CACTTACTAAACATCCTAATCAGGAGTATGCTGATGTCTTTCA | 16102 |
| gb:LC521925 | Organism:Severe | CACTTACTAAACATCCTAATCAGGAGTATGCTGATGTCTTTCA | 16075 |
| gb:MT093571 | Organism:Severe | CACTTACTAAACATCCTAATCAGGAGTATGCTGATGTCTTTCA | 16102 |
| gb:MT039887 | Organism:Severe | CACTTACTAAACATCCTAATCAGGAGTATGCTGATGTCTTTCA | 16102 |
| gb:MT019530 | Organism:Severe | CACTTACTAAACATCCTAATCAGGAGTATGCTGATGTCTTTCA | 16102 |
| gb:MT039888 | Organism:Severe | CACTTACTAAACATCCTAATCAGGAGTATGCTGATGTCTTTCA | 16102 |
| gb:LC522972 | Organism:Severe | CACTTACTAAACATCCTAATCAGGAGTATGCTGATGTCTTTCA | 16099 |
| gb:MT027063 | Organism:Severe | CACTTACTAAACATCCTAATCAGGAGTATGCTGATGTCTTTCA | 16102 |
| gb:MT027062 | Organism:Severe | CACTTACTAAACATCCTAATCAGGAGTATGCTGATGTCTTTCA | 16102 |
| gb:MT019529 | Organism:Severe | CACTTACTAAACATCCTAATCAGGAGTATGCTGATGTCTTTCA | 16102 |
| gb:MN996529 | Organism:Severe | CACTTACTAAACATCCTAATCAGGAGTATGCTGATGTCTTTCA | 16090 |
| gb:MN996531 | Organism:Severe | CACTTACTAAACATCCTAATCAGGAGTATGCTGATGTCTTTCA | 16089 |
| gb:MT066176 | Organism:Severe | CACTTACTAAACATCCTAATCAGGAGTATGCTGATGTCTTTCA | 16102 |
| gb:MT027064 | Organism:Severe | CACTTACTAAACATCCTAATCAGGAGTATGCTGATGTCTTTCA | 16102 |
| gb:MN994468 | Organism:Severe | CACTTACTAAACATCCTAATCAGGAGTATGCTGATGTCTTTCA | 16102 |
| gb:MT072688 | Organism:Severe | CACTTACTAAACATCCTAATCAGGAGTATGCTGATGTCTTTCA | 16087 |
| gb:MN996527 | Organism:Severe | CACTTACTAAACATCCTAATCAGGAGTATGCTGATGTCTTTCA | 16069 |
| gb:MT093631 | Organism:Severe | CACTTACTAAACATCCTAATCAGGAGTATGCTGATGTCTTTCA | 16140 |
| gb:MT106053 | Organism:Severe | CACTTACTAAACATCCTAATCAGGAGTATGCTGATGTCTTTCA | 16102 |
| gb:MT019533 | Organism:Severe | CACTTACTAAACATCCTAATCAGGAGTATGCTGATGTCTTTCA | 16102 |
| gb:MT019531 | Organism:Severe | CACTTACTAAACATCCTAATCAGGAGTATGCTGATGTCTTTCA | 16102 |
| gb:MN996528 | Organism:Severe | CACTTACTAAACATCCTAATCAGGAGTATGCTGATGTCTTTCA | 16102 |
| gb:MN996530 | Organism:Severe | CACTTACTAAACATCCTAATCAGGAGTATGCTGATGTCTTTCA | 16088 |
| gb:MN908947 | Organism:Severe | CACTTACTAAACATCCTAATCAGGAGTATGCTGATGTCTTTCA | 16102 |
| gb:MT019532 | Organism:Severe | CACTTACTAAACATCCTAATCAGGAGTATGCTGATGTCTTTCA | 16102 |

\*\*\*\*\*

|             |                 |                                              |       |
|-------------|-----------------|----------------------------------------------|-------|
| gb:MT020781 | Organism:Severe | TAAGAAAGCTACATGATGAGTTAACAGGACACATGTTAGACATG | 16150 |
| gb:MT007544 | Organism:Severe | TAAGAAAGCTACATGATGAGTTAACAGGACACATGTTAGACATG | 16162 |
| gb:MN994467 | Organism:Severe | TAAGAAAGCTACATGATGAGTTAACAGGACACATGTTAGACATG | 16162 |
| gb:MT044257 | Organism:Severe | TAAGAAAGCTACATGATGAGTTAACAGGACACATGTTAGACATG | 16162 |
| gb:MT106054 | Organism:Severe | TAAGAAAGCTACATGATGAGTTAACAGGACACATGTTAGACATG | 16162 |
| gb:MT049951 | Organism:Severe | TAAGAAAGCTACATGATGAGTTAACAGGACACATGTTAGACATG | 16162 |
| gb:MN975262 | Organism:Severe | TAAGAAAGCTACATGATGAGTTAACAGGACACATGTTAGACATG | 16162 |
| gb:MT106052 | Organism:Severe | TAAGAAAGCTACATGATGAGTTAACAGGACACATGTTAGACATG | 16162 |
| gb:LC522975 | Organism:Severe | TAAGAAAGCTACATGATGAGTTAACAGGACACATGTTAGACATG | 16159 |
| gb:LC522973 | Organism:Severe | TAAGAAAGCTACATGATGAGTTAACAGGACACATGTTAGACATG | 16159 |
| gb:LC522974 | Organism:Severe | TAAGAAAGCTACATGATGAGTTAACAGGACACATGTTAGACATG | 16159 |
| gb:MN985325 | Organism:Severe | TAAGAAAGCTACATGATGAGTTAACAGGACACATGTTAGACATG | 16162 |
| gb:MT020881 | Organism:Severe | TAAGAAAGCTACATGATGAGTTAACAGGACACATGTTAGACATG | 16162 |
| gb:MT020880 | Organism:Severe | TAAGAAAGCTACATGATGAGTTAACAGGACACATGTTAGACATG | 16162 |
| gb:MT066175 | Organism:Severe | TAAGAAAGCTACATGATGAGTTAACAGGACACATGTTAGACATG | 16162 |
| gb:MN997409 | Organism:Severe | TAAGAAAGCTACATGATGAGTTAACAGGACACATGTTAGACATG | 16162 |
| gb:MN938384 | Organism:Severe | TAAGAAAGCTACATGATGAGTTAACAGGACACATGTTAGACATG | 16130 |
| gb:MT044258 | Organism:Severe | TAAGAAAGCTACATGATGAGTTAACAGGACACATGTTAGACATG | 16138 |
| gb:MT039890 | Organism:Severe | TAAGAAAGCTACATGATGAGTTAACAGGACACATGTTAGACATG | 16162 |
| gb:MN988713 | Organism:Severe | TAAGAAAGCTACATGATGAGTTAACAGGACACATGTTAGACATG | 16162 |
| gb:LC521925 | Organism:Severe | TAAGAAAGCTACATGATGAGTTAACAGGACACATGTTAGACATG | 16135 |
| gb:MT093571 | Organism:Severe | TAAGAAAGCTACATGATGAGTTAACAGGACACATGTTAGACATG | 16162 |
| gb:MT039887 | Organism:Severe | TAAGAAAGCTACATGATGAGTTAACAGGACACATGTTAGACATG | 16162 |
| gb:MT019530 | Organism:Severe | TAAGAAAGCTACATGATGAGTTAACAGGACACATGTTAGACATG | 16162 |
| gb:MT039888 | Organism:Severe | TAAGAAAGCTACATGATGAGTTAACAGGACACATGTTAGACATG | 16162 |
| gb:LC522972 | Organism:Severe | TAAGAAAGCTACATGATGAGTTAACAGGACACATGTTAGACATG | 16159 |
| gb:MT027063 | Organism:Severe | TAAGAAAGCTACATGATGAGTTAACAGGACACATGTTAGACATG | 16162 |
| gb:MT027062 | Organism:Severe | TAAGAAAGCTACATGATGAGTTAACAGGACACATGTTAGACATG | 16162 |
| gb:MT019529 | Organism:Severe | TAAGAAAGCTACATGATGAGTTAACAGGACACATGTTAGACATG | 16162 |
| gb:MN996529 | Organism:Severe | TAAGAAAGCTACATGATGAGTTAACAGGACACATGTTAGACATG | 16150 |
| gb:MN996531 | Organism:Severe | TAAGAAAGCTACATGATGAGTTAACAGGACACATGTTAGACATG | 16149 |
| gb:MT066176 | Organism:Severe | TAAGAAAGCTACATGATGAGTTAACAGGACACATGTTAGACATG | 16162 |
| gb:MT027064 | Organism:Severe | TAAGAAAGCTACATGATGAGTTAACAGGACACATGTTAGACATG | 16162 |
| gb:MN994468 | Organism:Severe | TAAGAAAGCTACATGATGAGTTAACAGGACACATGTTAGACATG | 16162 |
| gb:MT072688 | Organism:Severe | TAAGAAAGCTACATGATGAGTTAACAGGACACATGTTAGACATG | 16147 |
| gb:MN996527 | Organism:Severe | TAAGAAAGCTACATGATGAGTTAACAGGACACATGTTAGACATG | 16129 |
| gb:MT093631 | Organism:Severe | TAAGAAAGCTACATGATGAGTTAACAGGACACATGTTAGACATG | 16200 |



|             |                 |                                                              |       |
|-------------|-----------------|--------------------------------------------------------------|-------|
| gb:MT106053 | Organism:Severe | TAAGAAAGCTACATGATGAGTTAACAGGACACATGTTAGACATGTATTCTGTTATGCTTA | 16162 |
| gb:MT019533 | Organism:Severe | TAAGAAAGCTACATGATGAGTTAACAGGACACATGTTAGACATGTATTCTGTTATGCTTA | 16162 |
| gb:MT019531 | Organism:Severe | TAAGAAAGCTACATGATGAGTTAACAGGACACATGTTAGACATGTATTCTGTTATGCTTA | 16162 |
| gb:MN996528 | Organism:Severe | TAAGAAAGCTACATGATGAGTTAACAGGACACATGTTAGACATGTATTCTGTTATGCTTA | 16162 |
| gb:MN996530 | Organism:Severe | TAAGAAAGCTACATGATGAGTTAACAGGACACATGTTAGACATGTATTCTGTTATGCTTA | 16148 |
| gb:MN908947 | Organism:Severe | TAAGAAAGCTACATGATGAGTTAACAGGACACATGTTAGACATGTATTCTGTTATGCTTA | 16162 |
| gb:MT019532 | Organism:Severe | TAAGAAAGCTACATGATGAGTTAACAGGACACATGTTAGACATGTATTCTGTTATGCTTA | 16162 |

\*\*\*\*\*

|             |                 |                                                              |       |
|-------------|-----------------|--------------------------------------------------------------|-------|
| gb:MT020781 | Organism:Severe | CTAATGATAACACTTCAAGGTATTGGGAACCTGAGTTTTATGAGGCTATGTACACACCGC | 16210 |
| gb:MT007544 | Organism:Severe | CTAATGATAACACTTCAAGGTATTGGGAACCTGAGTTTTATGAGGCTATGTACACACCGC | 16222 |
| gb:MN994467 | Organism:Severe | CTAATGATAACACTTCAAGGTATTGGGAACCTGAGTTTTATGAGGCTATGTACACACCGC | 16222 |
| gb:MT044257 | Organism:Severe | CTAATGATAACACTTCAAGGTATTGGGAACCTGAGTTTTATGAGGCTATGTACACACCGC | 16222 |
| gb:MT106054 | Organism:Severe | CTAATGATAACACTTCAAGGTATTGGGAACCTGAGTTTTATGAGGCTATGTACACACCGC | 16222 |
| gb:MT049951 | Organism:Severe | CTAATGATAACACTTCAAGGTATTGGGAACCTGAGTTTTATGAGGCTATGTACACACCGC | 16222 |
| gb:MN975262 | Organism:Severe | CTAATGATAACACTTCAAGGTATTGGGAACCTGAGTTTTATGAGGCTATGTACACACCGC | 16222 |
| gb:MT106052 | Organism:Severe | CTAATGATAACACTTCAAGGTATTGGGAACCTGAGTTTTATGAGGCTATGTACACACCGC | 16222 |
| gb:LC522975 | Organism:Severe | CTAATGATAACACTTCAAGGTATTGGGAACCTGAGTTTTATGAGGCTATGTACACACCGC | 16219 |
| gb:LC522973 | Organism:Severe | CTAATGATAACACTTCAAGGTATTGGGAACCTGAGTTTTATGAGGCTATGTACACACCGC | 16219 |
| gb:LC522974 | Organism:Severe | CTAATGATAACACTTCAAGGTATTGGGAACCTGAGTTTTATGAGGCTATGTACACACCGC | 16219 |
| gb:MN985325 | Organism:Severe | CTAATGATAACACTTCAAGGTATTGGGAACCTGAGTTTTATGAGGCTATGTACACACCGC | 16222 |
| gb:MT020881 | Organism:Severe | CTAATGATAACACTTCAAGGTATTGGGAACCTGAGTTTTATGAGGCTATGTACACACCGC | 16222 |
| gb:MT020880 | Organism:Severe | CTAATGATAACACTTCAAGGTATTGGGAACCTGAGTTTTATGAGGCTATGTACACACCGC | 16222 |
| gb:MT066175 | Organism:Severe | CTAATGATAACACTTCAAGGTATTGGGAACCTGAGTTTTATGAGGCTATGTACACACCGC | 16222 |
| gb:MN997409 | Organism:Severe | CTAATGATAACACTTCAAGGTATTGGGAACCTGAGTTTTATGAGGCTATGTACACACCGC | 16222 |
| gb:MN938384 | Organism:Severe | CTAATGATAACACTTCAAGGTATTGGGAACCTGAGTTTTATGAGGCTATGTACACACCGC | 16190 |
| gb:MT044258 | Organism:Severe | CTAATGATAACACTTCAAGGTATTGGGAACCTGAGTTTTATGAGGCTATGTACACACCGC | 16198 |
| gb:MT039890 | Organism:Severe | CTAATGATAACACTTCAAGGTATTGGGAACCTGAGTTTTATGAGGCTATGTACACACCGC | 16222 |
| gb:MN988713 | Organism:Severe | CTAATGATAACACTTCAAGGTATTGGGAACCTGAGTTTTATGAGGCTATGTACACACCGC | 16222 |
| gb:LC521925 | Organism:Severe | CTAATGATAACACTTCAAGGTATTGGGAACCTGAGTTTTATGAGGCTATGTACACACCGC | 16195 |
| gb:MT093571 | Organism:Severe | CTAATGATAACACTTCAAGGTATTGGGAACCTGAGTTTTATGAGGCTATGTACACACCGC | 16222 |
| gb:MT039887 | Organism:Severe | CTAATGATAACACTTCAAGGTATTGGGAACCTGAGTTTTATGAGGCTATGTACACACCGC | 16222 |
| gb:MT019530 | Organism:Severe | CTAATGATAACACTTCAAGGTATTGGGAACCTGAGTTTTATGAGGCTATGTACACACCGC | 16222 |
| gb:MT039888 | Organism:Severe | CTAATGATAACACTTCAAGGTATTGGGAACCTGAGTTTTATGAGGCTATGTACACACCGC | 16222 |
| gb:LC522972 | Organism:Severe | CTAATGATAACACTTCAAGGTATTGGGAACCTGAGTTTTATGAGGCTATGTACACACCGC | 16219 |
| gb:MT027063 | Organism:Severe | CTAATGATAACACTTCAAGGTATTGGGAACCTGAGTTTTATGAGGCTATGTACACACCGC | 16222 |
| gb:MT027062 | Organism:Severe | CTAATGATAACACTTCAAGGTATTGGGAACCTGAGTTTTATGAGGCTATGTACACACCGC | 16222 |
| gb:MT019529 | Organism:Severe | CTAATGATAACACTTCAAGGTATTGGGAACCTGAGTTTTATGAGGCTATGTACACACCGC | 16222 |
| gb:MN996529 | Organism:Severe | CTAATGATAACACTTCAAGGTATTGGGAACCTGAGTTTTATGAGGCTATGTACACACCGC | 16210 |
| gb:MN996531 | Organism:Severe | CTAATGATAACACTTCAAGGTATTGGGAACCTGAGTTTTATGAGGCTATGTACACACCGC | 16209 |
| gb:MT066176 | Organism:Severe | CTAATGATAACACTTCAAGGTATTGGGAACCTGAGTTTTATGAGGCTATGTACACACCGC | 16222 |
| gb:MT027064 | Organism:Severe | CTAATGATAACACTTCAAGGTATTGGGAACCTGAGTTTTATGAGGCTATGTACACACCGC | 16222 |
| gb:MN994468 | Organism:Severe | CTAATGATAACACTTCAAGGTATTGGGAACCTGAGTTTTATGAGGCTATGTACACACCGC | 16222 |
| gb:MT072688 | Organism:Severe | CTAATGATAACACTTCAAGGTATTGGGAACCTGAGTTTTATGAGGCTATGTACACACCGC | 16207 |
| gb:MN996527 | Organism:Severe | CTAATGATAACACTTCAAGGTATTGGGAACCTGAGTTTTATGAGGCTATGTACACACCGC | 16189 |
| gb:MT093631 | Organism:Severe | CTAATGATAACACTTCAAGGTATTGGGAACCTGAGTTTTATGAGGCTATGTACACACCGC | 16260 |
| gb:MT106053 | Organism:Severe | CTAATGATAACACTTCAAGGTATTGGGAACCTGAGTTTTATGAGGCTATGTACACACCGC | 16222 |
| gb:MT019533 | Organism:Severe | CTAATGATAACACTTCAAGGTATTGGGAACCTGAGTTTTATGAGGCTATGTACACACCGC | 16222 |
| gb:MT019531 | Organism:Severe | CTAATGATAACACTTCAAGGTATTGGGAACCTGAGTTTTATGAGGCTATGTACACACCGC | 16222 |
| gb:MN996528 | Organism:Severe | CTAATGATAACACTTCAAGGTATTGGGAACCTGAGTTTTATGAGGCTATGTACACACCGC | 16222 |
| gb:MN996530 | Organism:Severe | CTAATGATAACACTTCAAGGTATTGGGAACCTGAGTTTTATGAGGCTATGTACACACCGC | 16208 |
| gb:MN908947 | Organism:Severe | CTAATGATAACACTTCAAGGTATTGGGAACCTGAGTTTTATGAGGCTATGTACACACCGC | 16222 |
| gb:MT019532 | Organism:Severe | CTAATGATAACACTTCAAGGTATTGGGAACCTGAGTTTTATGAGGCTATGTACACACCGC | 16222 |

\*\*\*\*\*

|             |                 |                                                              |       |
|-------------|-----------------|--------------------------------------------------------------|-------|
| gb:MT020781 | Organism:Severe | ATACAGTCTTACAGGCTGTTGGGGCTTGTGTTCTTTGCAATTCACAGACTTCATTAAGAT | 16270 |
| gb:MT007544 | Organism:Severe | ATACAGTCTTACAGGCTGTTGGGGCTTGTGTTCTTTGCAATTCACAGACTTCATTAAGAT | 16282 |
| gb:MN994467 | Organism:Severe | ATACAGTCTTACAGGCTGTTGGGGCTTGTGTTCTTTGCAATTCACAGACTTCATTAAGAT | 16282 |
| gb:MT044257 | Organism:Severe | ATACAGTCTTACAGGCTGTTGGGGCTTGTGTTCTTTGCAATTCACAGACTTCATTAAGAT | 16282 |
| gb:MT106054 | Organism:Severe | ATACAGTCTTACAGGCTGTTGGGGCTTGTGTTCTTTGCAATTCACAGACTTCATTAAGAT | 16282 |
| gb:MT049951 | Organism:Severe | ATACAGTCTTACAGGCTGTTGGGGCTTGTGTTCTTTGCAATTCACAGACTTCATTAAGAT | 16282 |
| gb:MN975262 | Organism:Severe | ATACAGTCTTACAGGCTGTTGGGGCTTGTGTTCTTTGCAATTCACAGACTTCATTAAGAT | 16282 |
| gb:MT106052 | Organism:Severe | ATACAGTCTTACAGGCTGTTGGGGCTTGTGTTCTTTGCAATTCACAGACTTCATTAAGAT | 16282 |
| gb:LC522975 | Organism:Severe | ATACAGTCTTACAGGCTGTTGGGGCTTGTGTTCTTTGCAATTCACAGACTTCATTAAGAT | 16279 |
| gb:LC522973 | Organism:Severe | ATACAGTCTTACAGGCTGTTGGGGCTTGTGTTCTTTGCAATTCACAGACTTCATTAAGAT | 16279 |

|             |                 |                                                              |       |
|-------------|-----------------|--------------------------------------------------------------|-------|
| gb:LC522974 | Organism:Severe | ATACAGTCTTACAGGCTGTTGGGGCTTGTGTTCTTTGCAATTCACAGACTTCATTAAGAT | 16279 |
| gb:MN985325 | Organism:Severe | ATACAGTCTTACAGGCTGTTGGGGCTTGTGTTCTTTGCAATTCACAGACTTCATTAAGAT | 16282 |
| gb:MT020881 | Organism:Severe | ATACAGTCTTACAGGCTGTTGGGGCTTGTGTTCTTTGCAATTCACAGACTTCATTAAGAT | 16282 |
| gb:MT020880 | Organism:Severe | ATACAGTCTTACAGGCTGTTGGGGCTTGTGTTCTTTGCAATTCACAGACTTCATTAAGAT | 16282 |
| gb:MT066175 | Organism:Severe | ATACAGTCTTACAGGCTGTTGGGGCTTGTGTTCTTTGCAATTCACAGACTTCATTAAGAT | 16282 |
| gb:MN997409 | Organism:Severe | ATACAGTCTTACAGGCTGTTGGGGCTTGTGTTCTTTGCAATTCACAGACTTCATTAAGAT | 16282 |
| gb:MN938384 | Organism:Severe | ATACAGTCTTACAGGCTGTTGGGGCTTGTGTTCTTTGCAATTCACAGACTTCATTAAGAT | 16250 |
| gb:MT044258 | Organism:Severe | ATACAGTCTTACAGGCTGTTGGGGCTTGTGTTCTTTGCAATTCACAGACTTCATTAAGAT | 16258 |
| gb:MT039890 | Organism:Severe | ATACAGTCTTACAGGCTGTTGGGGCTTGTGTTCTTTGCAATTCACAGACTTCATTAAGAT | 16282 |
| gb:MN988713 | Organism:Severe | ATACAGTCTTACAGGCTGTTGGGGCTTGTGTTCTTTGCAATTCACAGACTTCATTAAGAT | 16282 |
| gb:LC521925 | Organism:Severe | ATACAGTCTTACAGGCTGTTGGGGCTTGTGTTCTTTGCAATTCACAGACTTCATTAAGAT | 16255 |
| gb:MT093571 | Organism:Severe | ATACAGTCTTACAGGCTGTTGGGGCTTGTGTTCTTTGCAATTCACAGACTTCATTAAGAT | 16282 |
| gb:MT039887 | Organism:Severe | ATACAGTCTTACAGGCTGTTGGGGCTTGTGTTCTTTGCAATTCACAGACTTCATTAAGAT | 16282 |
| gb:MT019530 | Organism:Severe | ATACAGTCTTACAGGCTGTTGGGGCTTGTGTTCTTTGCAATTCACAGACTTCATTAAGAT | 16282 |
| gb:MT039888 | Organism:Severe | ATACAGTCTTACAGGCTGTTGGGGCTTGTGTTCTTTGCAATTCACAGACTTCATTAAGAT | 16282 |
| gb:LC522972 | Organism:Severe | ATACAGTCTTACAGGCTGTTGGGGCTTGTGTTCTTTGCAATTCACAGACTTCATTAAGAT | 16279 |
| gb:MT027063 | Organism:Severe | ATACAGTCTTACAGGCTGTTGGGGCTTGTGTTCTTTGCAATTCACAGACTTCATTAAGAT | 16282 |
| gb:MT027062 | Organism:Severe | ATACAGTCTTACAGGCTGTTGGGGCTTGTGTTCTTTGCAATTCACAGACTTCATTAAGAT | 16282 |
| gb:MT019529 | Organism:Severe | ATACAGTCTTACAGGCTGTTGGGGCTTGTGTTCTTTGCAATTCACAGACTTCATTAAGAT | 16282 |
| gb:MN996529 | Organism:Severe | ATACAGTCTTACAGGCTGTTGGGGCTTGTGTTCTTTGCAATTCACAGACTTCATTAAGAT | 16270 |
| gb:MN996531 | Organism:Severe | ATACAGTCTTACAGGCTGTTGGGGCTTGTGTTCTTTGCAATTCACAGACTTCATTAAGAT | 16269 |
| gb:MT066176 | Organism:Severe | ATACAGTCTTACAGGCTGTTGGGGCTTGTGTTCTTTGCAATTCACAGACTTCATTAAGAT | 16282 |
| gb:MT027064 | Organism:Severe | ATACAGTCTTACAGGCTGTTGGGGCTTGTGTTCTTTGCAATTCACAGACTTCATTAAGAT | 16282 |
| gb:MN994468 | Organism:Severe | ATACAGTCTTACAGGCTGTTGGGGCTTGTGTTCTTTGCAATTCACAGACTTCATTAAGAT | 16282 |
| gb:MT072688 | Organism:Severe | ATACAGTCTTACAGGCTGTTGGGGCTTGTGTTCTTTGCAATTCACAGACTTCATTAAGAT | 16267 |
| gb:MN996527 | Organism:Severe | ATACAGTCTTACAGGCTGTTGGGGCTTGTGTTCTTTGCAATTCACAGACTTCATTAAGAT | 16249 |
| gb:MT093631 | Organism:Severe | ATACAGTCTTACAGGCTGTTGGGGCTTGTGTTCTTTGCAATTCACAGACTTCATTAAGAT | 16320 |
| gb:MT106053 | Organism:Severe | ATACAGTCTTACAGGCTGTTGGGGCTTGTGTTCTTTGCAATTCACAGACTTCATTAAGAT | 16282 |
| gb:MT019533 | Organism:Severe | ATACAGTCTTACAGGCTGTTGGGGCTTGTGTTCTTTGCAATTCACAGACTTCATTAAGAT | 16282 |
| gb:MT019531 | Organism:Severe | ATACAGTCTTACAGGCTGTTGGGGCTTGTGTTCTTTGCAATTCACAGACTTCATTAAGAT | 16282 |
| gb:MN996528 | Organism:Severe | ATACAGTCTTACAGGCTGTTGGGGCTTGTGTTCTTTGCAATTCACAGACTTCATTAAGAT | 16282 |
| gb:MN996530 | Organism:Severe | ATACAGTCTTACAGGCTGTTGGGGCTTGTGTTCTTTGCAATTCACAGACTTCATTAAGAT | 16268 |
| gb:MN908947 | Organism:Severe | ATACAGTCTTACAGGCTGTTGGGGCTTGTGTTCTTTGCAATTCACAGACTTCATTAAGAT | 16282 |
| gb:MT019532 | Organism:Severe | ATACAGTCTTACAGGCTGTTGGGGCTTGTGTTCTTTGCAATTCACAGACTTCATTAAGAT | 16282 |

\*\*\*\*\*

|             |                 |                                                             |       |
|-------------|-----------------|-------------------------------------------------------------|-------|
| gb:MT020781 | Organism:Severe | GTGGTGCTTGCATACGTAGACCATTCTTATGTTGTAATGCTGTTACGACCATGTCATAT | 16330 |
| gb:MT007544 | Organism:Severe | GTGGTGCTTGCATACGTAGACCATTCTTATGTTGTAATGCTGTTACGACCATGTCATAT | 16342 |
| gb:MN994467 | Organism:Severe | GTGGTGCTTGCATACGTAGACCATTCTTATGTTGTAATGCTGTTACGACCATGTCATAT | 16342 |
| gb:MT044257 | Organism:Severe | GTGGTGCTTGCATACGTAGACCATTCTTATGTTGTAATGCTGTTACGACCATGTCATAT | 16342 |
| gb:MT106054 | Organism:Severe | GTGGTGCTTGCATACGTAGACCATTCTTATGTTGTAATGCTGTTACGACCATGTCATAT | 16342 |
| gb:MT049951 | Organism:Severe | GTGGTGCTTGCATACGTAGACCATTCTTATGTTGTAATGCTGTTACGACCATGTCATAT | 16342 |
| gb:MN975262 | Organism:Severe | GTGGTGCTTGCATACGTAGACCATTCTTATGTTGTAATGCTGTTACGACCATGTCATAT | 16342 |
| gb:MT106052 | Organism:Severe | GTGGTGCTTGCATACGTAGACCATTCTTATGTTGTAATGCTGTTACGACCATGTCATAT | 16342 |
| gb:LC522975 | Organism:Severe | GTGGTGCTTGCATACGTAGACCATTCTTATGTTGTAATGCTGTTACGACCATGTCATAT | 16339 |
| gb:LC522973 | Organism:Severe | GTGGTGCTTGCATACGTAGACCATTCTTATGTTGTAATGCTGTTACGACCATGTCATAT | 16339 |
| gb:LC522974 | Organism:Severe | GTGGTGCTTGCATACGTAGACCATTCTTATGTTGTAATGCTGTTACGACCATGTCATAT | 16339 |
| gb:MN985325 | Organism:Severe | GTGGTGCTTGCATACGTAGACCATTCTTATGTTGTAATGCTGTTACGACCATGTCATAT | 16342 |
| gb:MT020881 | Organism:Severe | GTGGTGCTTGCATACGTAGACCATTCTTATGTTGTAATGCTGTTACGACCATGTCATAT | 16342 |
| gb:MT020880 | Organism:Severe | GTGGTGCTTGCATACGTAGACCATTCTTATGTTGTAATGCTGTTACGACCATGTCATAT | 16342 |
| gb:MT066175 | Organism:Severe | GTGGTGCTTGCATACGTAGACCATTCTTATGTTGTAATGCTGTTACGACCATGTCATAT | 16342 |
| gb:MN997409 | Organism:Severe | GTGGTGCTTGCATACGTAGACCATTCTTATGTTGTAATGCTGTTACGACCATGTCATAT | 16342 |
| gb:MN938384 | Organism:Severe | GTGGTGCTTGCATACGTAGACCATTCTTATGTTGTAATGCTGTTACGACCATGTCATAT | 16310 |
| gb:MT044258 | Organism:Severe | GTGGTGCTTGCATACGTAGACCATTCTTATGTTGTAATGCTGTTACGACCATGTCATAT | 16318 |
| gb:MT039890 | Organism:Severe | GTGGTGCTTGCATACGTAGACCATTCTTATGTTGTAATGCTGTTACGACCATGTCATAT | 16342 |
| gb:MN988713 | Organism:Severe | GTGGTGCTTGCATACGTAGACCATTCTTATGTTGTAATGCTGTTACGACCATGTCATAT | 16342 |
| gb:LC521925 | Organism:Severe | GTGGTGCTTGCATACGTAGACCATTCTTATGTTGTAATGCTGTTACGACCATGTCATAT | 16315 |
| gb:MT093571 | Organism:Severe | GTGGTGCTTGCATACGTAGACCATTCTTATGTTGTAATGCTGTTACGACCATGTCATAT | 16342 |
| gb:MT039887 | Organism:Severe | GTGGTGCTTGCATACGTAGACCATTCTTATGTTGTAATGCTGTTACGACCATGTCATAT | 16342 |
| gb:MT019530 | Organism:Severe | GTGGTGCTTGCATACGTAGACCATTCTTATGTTGTAATGCTGTTACGACCATGTCATAT | 16342 |
| gb:MT039888 | Organism:Severe | GTGGTGCTTGCATACGTAGACCATTCTTATGTTGTAATGCTGTTACGACCATGTCATAT | 16342 |
| gb:LC522972 | Organism:Severe | GTGGTGCTTGCATACGTAGACCATTCTTATGTTGTAATGCTGTTACGACCATGTCATAT | 16339 |
| gb:MT027063 | Organism:Severe | GTGGTGCTTGCATACGTAGACCATTCTTATGTTGTAATGCTGTTACGACCATGTCATAT | 16342 |
| gb:MT027062 | Organism:Severe | GTGGTGCTTGCATACGTAGACCATTCTTATGTTGTAATGCTGTTACGACCATGTCATAT | 16342 |
| gb:MT019529 | Organism:Severe | GTGGTGCTTGCATACGTAGACCATTCTTATGTTGTAATGCTGTTACGACCATGTCATAT | 16342 |

|             |                 |                                                            |       |
|-------------|-----------------|------------------------------------------------------------|-------|
| gb:MN996529 | Organism:Severe | GTGGTGCTTCATACGTAGACCATTCTTATGTTGTAATGCTGTTACGACCATGTCATAT | 16330 |
| gb:MN996531 | Organism:Severe | GTGGTGCTTCATACGTAGACCATTCTTATGTTGTAATGCTGTTACGACCATGTCATAT | 16329 |
| gb:MT066176 | Organism:Severe | GTGGTGCTTCATACGTAGACCATTCTTATGTTGTAATGCTGTTACGACCATGTCATAT | 16342 |
| gb:MT027064 | Organism:Severe | GTGGTGCTTCATACGTAGACCATTCTTATGTTGTAATGCTGTTACGACCATGTCATAT | 16342 |
| gb:MN994468 | Organism:Severe | GTGGTGCTTCATACGTAGACCATTCTTATGTTGTAATGCTGTTACGACCATGTCATAT | 16342 |
| gb:MT072688 | Organism:Severe | GTGGTGCTTCATACGTAGACCATTCTTATGTTGTAATGCTGTTACGACCATGTCATAT | 16327 |
| gb:MN996527 | Organism:Severe | GTGGTGCTTCATACGTAGACCATTCTTATGTTGTAATGCTGTTACGACCATGTCATAT | 16309 |
| gb:MT093631 | Organism:Severe | GTGGTGCTTCATACGTAGACCATTCTTATGTTGTAATGCTGTTACGACCATGTCATAT | 16380 |
| gb:MT106053 | Organism:Severe | GTGGTGCTTCATACGTAGACCATTCTTATGTTGTAATGCTGTTACGACCATGTCATAT | 16342 |
| gb:MT019533 | Organism:Severe | GTGGTGCTTCATACGTAGACCATTCTTATGTTGTAATGCTGTTACGACCATGTCATAT | 16342 |
| gb:MT019531 | Organism:Severe | GTGGTGCTTCATACGTAGACCATTCTTATGTTGTAATGCTGTTACGACCATGTCATAT | 16342 |
| gb:MN996528 | Organism:Severe | GTGGTGCTTCATACGTAGACCATTCTTATGTTGTAATGCTGTTACGACCATGTCATAT | 16342 |
| gb:MN996530 | Organism:Severe | GTGGTGCTTCATACGTAGACCATTCTTATGTTGTAATGCTGTTACGACCATGTCATAT | 16328 |
| gb:MN908947 | Organism:Severe | GTGGTGCTTCATACGTAGACCATTCTTATGTTGTAATGCTGTTACGACCATGTCATAT | 16342 |
| gb:MT019532 | Organism:Severe | GTGGTGCTTCATACGTAGACCATTCTTATGTTGTAATGCTGTTACGACCATGTCATAT | 16342 |

\*\*\*\*\*

|             |                 |                                                            |       |
|-------------|-----------------|------------------------------------------------------------|-------|
| gb:MT020781 | Organism:Severe | CAACATCACATAAATTAGTCTTGTCTGTTAATCCGTATGTTTGAATGCTCCAGTTGTG | 16390 |
| gb:MT007544 | Organism:Severe | CAACATCACATAAATTAGTCTTGTCTGTTAATCCGTATGTTTGAATGCTCCAGTTGTG | 16402 |
| gb:MN994467 | Organism:Severe | CAACATCACATAAATTAGTCTTGTCTGTTAATCCGTATGTTTGAATGCTCCAGTTGTG | 16402 |
| gb:MT044257 | Organism:Severe | CAACATCACATAAATTAGTCTTGTCTGTTAATCCGTATGTTTGAATGCTCCAGTTGTG | 16402 |
| gb:MT106054 | Organism:Severe | CAACATCACATAAATTAGTCTTGTCTGTTAATCCGTATGTTTGAATGCTCCAGTTGTG | 16402 |
| gb:MT049951 | Organism:Severe | CAACATCACATAAATTAGTCTTGTCTGTTAATCCGTATGTTTGAATGCTCCAGTTGTG | 16402 |
| gb:MN975262 | Organism:Severe | CAACATCACATAAATTAGTCTTGTCTGTTAATCCGTATGTTTGAATGCTCCAGTTGTG | 16402 |
| gb:MT106052 | Organism:Severe | CAACATCACATAAATTAGTCTTGTCTGTTAATCCGTATGTTTGAATGCTCCAGTTGTG | 16402 |
| gb:LC522975 | Organism:Severe | CAACATCACATAAATTAGTCTTGTCTGTTAATCCGTATGTTTGAATGCTCCAGTTGTG | 16399 |
| gb:LC522973 | Organism:Severe | CAACATCACATAAATTAGTCTTGTCTGTTAATCCGTATGTTTGAATGCTCCAGTTGTG | 16399 |
| gb:LC522974 | Organism:Severe | CAACATCACATAAATTAGTCTTGTCTGTTAATCCGTATGTTTGAATGCTCCAGTTGTG | 16399 |
| gb:MN985325 | Organism:Severe | CAACATCACATAAATTAGTCTTGTCTGTTAATCCGTATGTTTGAATGCTCCAGTTGTG | 16402 |
| gb:MT020881 | Organism:Severe | CAACATCACATAAATTAGTCTTGTCTGTTAATCCGTATGTTTGAATGCTCCAGTTGTG | 16402 |
| gb:MT020880 | Organism:Severe | CAACATCACATAAATTAGTCTTGTCTGTTAATCCGTATGTTTGAATGCTCCAGTTGTG | 16402 |
| gb:MT066175 | Organism:Severe | CAACATCACATAAATTAGTCTTGTCTGTTAATCCGTATGTTTGAATGCTCCAGTTGTG | 16402 |
| gb:MN997409 | Organism:Severe | CAACATCACATAAATTAGTCTTGTCTGTTAATCCGTATGTTTGAATGCTCCAGTTGTG | 16402 |
| gb:MN938384 | Organism:Severe | CAACATCACATAAATTAGTCTTGTCTGTTAATCCGTATGTTTGAATGCTCCAGTTGTG | 16370 |
| gb:MT044258 | Organism:Severe | CAACATCACATAAATTAGTCTTGTCTGTTAATCCGTATGTTTGAATGCTCCAGTTGTG | 16378 |
| gb:MT039890 | Organism:Severe | CAACATCACATAAATTAGTCTTGTCTGTTAATCCGTATGTTTGAATGCTCCAGTTGTG | 16402 |
| gb:MN988713 | Organism:Severe | CAACATCACATAAATTAGTCTTGTCTGTTAATCCGTATGTTTGAATGCTCCAGTTGTG | 16402 |
| gb:LC521925 | Organism:Severe | CAACATCACATAAATTAGTCTTGTCTGTTAATCCGTATGTTTGAATGCTCCAGTTGTG | 16375 |
| gb:MT093571 | Organism:Severe | CAACATCACATAAATTAGTCTTGTCTGTTAATCCGTATGTTTGAATGCTCCAGTTGTG | 16402 |
| gb:MT039887 | Organism:Severe | CAACATCACATAAATTAGTCTTGTCTGTTAATCCGTATGTTTGAATGCTCCAGTTGTG | 16402 |
| gb:MT019530 | Organism:Severe | CAACATCACATAAATTAGTCTTGTCTGTTAATCCGTATGTTTGAATGCTCCAGTTGTG | 16402 |
| gb:MT039888 | Organism:Severe | CAACATCACATAAATTAGTCTTGTCTGTTAATCCGTATGTTTGAATGCTCCAGTTGTG | 16402 |
| gb:LC522972 | Organism:Severe | CAACATCACATAAATTAGTCTTGTCTGTTAATCCGTATGTTTGAATGCTCCAGTTGTG | 16399 |
| gb:MT027063 | Organism:Severe | CAACATCACATAAATTAGTCTTGTCTGTTAATCCGTATGTTTGAATGCTCCAGTTGTG | 16402 |
| gb:MT027062 | Organism:Severe | CAACATCACATAAATTAGTCTTGTCTGTTAATCCGTATGTTTGAATGCTCCAGTTGTG | 16402 |
| gb:MT019529 | Organism:Severe | CAACATCACATAAATTAGTCTTGTCTGTTAATCCGTATGTTTGAATGCTCCAGTTGTG | 16402 |
| gb:MN996529 | Organism:Severe | CAACATCACATAAATTAGTCTTGTCTGTTAATCCGTATGTTTGAATGCTCCAGTTGTG | 16390 |
| gb:MN996531 | Organism:Severe | CAACATCACATAAATTAGTCTTGTCTGTTAATCCGTATGTTTGAATGCTCCAGTTGTG | 16389 |
| gb:MT066176 | Organism:Severe | CAACATCACATAAATTAGTCTTGTCTGTTAATCCGTATGTTTGAATGCTCCAGTTGTG | 16402 |
| gb:MT027064 | Organism:Severe | CAACATCACATAAATTAGTCTTGTCTGTTAATCCGTATGTTTGAATGCTCCAGTTGTG | 16402 |
| gb:MN994468 | Organism:Severe | CAACATCACATAAATTAGTCTTGTCTGTTAATCCGTATGTTTGAATGCTCCAGTTGTG | 16402 |
| gb:MT072688 | Organism:Severe | CAACATCACATAAATTAGTCTTGTCTGTTAATCCGTATGTTTGAATGCTCCAGTTGTG | 16387 |
| gb:MN996527 | Organism:Severe | CAACATCACATAAATTAGTCTTGTCTGTTAATCCGTATGTTTGAATGCTCCAGTTGTG | 16369 |
| gb:MT093631 | Organism:Severe | CAACATCACATAAATTAGTCTTGTCTGTTAATCCGTATGTTTGAATGCTCCAGTTGTG | 16440 |
| gb:MT106053 | Organism:Severe | CAACATCACATAAATTAGTCTTGTCTGTTAATCCGTATGTTTGAATGCTCCAGTTGTG | 16402 |
| gb:MT019533 | Organism:Severe | CAACATCACATAAATTAGTCTTGTCTGTTAATCCGTATGTTTGAATGCTCCAGTTGTG | 16402 |
| gb:MT019531 | Organism:Severe | CAACATCACATAAATTAGTCTTGTCTGTTAATCCGTATGTTTGAATGCTCCAGTTGTG | 16402 |
| gb:MN996528 | Organism:Severe | CAACATCACATAAATTAGTCTTGTCTGTTAATCCGTATGTTTGAATGCTCCAGTTGTG | 16402 |
| gb:MN996530 | Organism:Severe | CAACATCACATAAATTAGTCTTGTCTGTTAATCCGTATGTTTGAATGCTCCAGTTGTG | 16388 |
| gb:MN908947 | Organism:Severe | CAACATCACATAAATTAGTCTTGTCTGTTAATCCGTATGTTTGAATGCTCCAGTTGTG | 16402 |
| gb:MT019532 | Organism:Severe | CAACATCACATAAATTAGTCTTGTCTGTTAATCCGTATGTTTGAATGCTCCAGTTGTG | 16402 |

\*\*\*\*\*

|             |                 |                                                             |       |
|-------------|-----------------|-------------------------------------------------------------|-------|
| gb:MT020781 | Organism:Severe | ATGTCACAGATGTGACTCAACTTTACTTAGGAGGTATGAGCTATTATTGTAATCACATA | 16450 |
| gb:MT007544 | Organism:Severe | ATGTCACAGATGTGACTCAACTTTACTTAGGAGGTATGAGCTATTATTGTAATCACATA | 16462 |





|             |                  |                                                                       |       |
|-------------|------------------|-----------------------------------------------------------------------|-------|
| gb:MN996528 | Organism: Severe | CATGTGTTGGTAGCGATAATGTTACTGACTTTAATGCAATTGCAACATGTGACTGGACAA          | 16582 |
| gb:MN996530 | Organism: Severe | CATGTGTTGGTAGCGATAATGTTACTGACTTTAATGCAATTGCAACATGTGACTGGACAA          | 16568 |
| gb:MN908947 | Organism: Severe | CATGTGTTGGTAGCGATAATGTTACTGACTTTAATGCAATTGCAACATGTGACTGGACAA          | 16582 |
| gb:MT019532 | Organism: Severe | CATGTGTTGGTAGCGATAATGTTACTGACTTTAATGCAATTGCAACATGTGACTGGACAA<br>***** | 16582 |
| gb:MT020781 | Organism: Severe | ATGCTGGTGATTACATTTTAGCTAACACCTGTACTGAAAGACTCAAGCTTTTTGCAGCAG          | 16630 |
| gb:MT007544 | Organism: Severe | ATGCTGGTGATTACATTTTAGCTAACACCTGTACTGAAAGACTCAAGCTTTTTGCAGCAG          | 16642 |
| gb:MN994467 | Organism: Severe | ATGCTGGTGATTACATTTTAGCTAACACCTGTACTGAAAGACTCAAGCTTTTTGCAGCAG          | 16642 |
| gb:MT044257 | Organism: Severe | ATGCTGGTGATTACATTTTAGCTAACACCTGTACTGAAAGACTCAAGCTTTTTGCAGCAG          | 16642 |
| gb:MT106054 | Organism: Severe | ATGCTGGTGATTACATTTTAGCTAACACCTGTACTGAAAGACTCAAGCTTTTTGCAGCAG          | 16642 |
| gb:MT049951 | Organism: Severe | ATGCTGGTGATTACATTTTAGCTAACACCTGTACTGAAAGACTCAAGCTTTTTGCAGCAG          | 16642 |
| gb:MN975262 | Organism: Severe | ATGCTGGTGATTACATTTTAGCTAACACCTGTACTGAAAGACTCAAGCTTTTTGCAGCAG          | 16642 |
| gb:MT106052 | Organism: Severe | ATGCTGGTGATTACATTTTAGCTAACACCTGTACTGAAAGACTCAAGCTTTTTGCAGCAG          | 16642 |
| gb:LC522975 | Organism: Severe | ATGCTGGTGATTACATTTTAGCTAACACCTGTACTGAAAGACTCAAGCTTTTTGCAGCAG          | 16639 |
| gb:LC522973 | Organism: Severe | ATGCTGGTGATTACATTTTAGCTAACACCTGTACTGAAAGACTCAAGCTTTTTGCAGCAG          | 16639 |
| gb:LC522974 | Organism: Severe | ATGCTGGTGATTACATTTTAGCTAACACCTGTACTGAAAGACTCAAGCTTTTTGCAGCAG          | 16639 |
| gb:MN985325 | Organism: Severe | ATGCTGGTGATTACATTTTAGCTAACACCTGTACTGAAAGACTCAAGCTTTTTGCAGCAG          | 16642 |
| gb:MT020881 | Organism: Severe | ATGCTGGTGATTACATTTTAGCTAACACCTGTACTGAAAGACTCAAGCTTTTTGCAGCAG          | 16642 |
| gb:MT020880 | Organism: Severe | ATGCTGGTGATTACATTTTAGCTAACACCTGTACTGAAAGACTCAAGCTTTTTGCAGCAG          | 16642 |
| gb:MT066175 | Organism: Severe | ATGCTGGTGATTACATTTTAGCTAACACCTGTACTGAAAGACTCAAGCTTTTTGCAGCAG          | 16642 |
| gb:MN997409 | Organism: Severe | ATGCTGGTGATTACATTTTAGCTAACACCTGTACTGAAAGACTCAAGCTTTTTGCAGCAG          | 16642 |
| gb:MN938384 | Organism: Severe | ATGCTGGTGATTACATTTTAGCTAACACCTGTACTGAAAGACTCAAGCTTTTTGCAGCAG          | 16610 |
| gb:MT044258 | Organism: Severe | ATGCTGGTGATTACATTTTAGCTAACACCTGTACTGAAAGACTCAAGCTTTTTGCAGCAG          | 16618 |
| gb:MT039890 | Organism: Severe | ATGCTGGTGATTACATTTTAGCTAACACCTGTACTGAAAGACTCAAGCTTTTTGCAGCAG          | 16642 |
| gb:MN988713 | Organism: Severe | ATGCTGGTGATTACATTTTAGCTAACACCTGTACTGAAAGACTCAAGCTTTTTGCAGCAG          | 16642 |
| gb:LC521925 | Organism: Severe | ATGCTGGTGATTACATTTTAGCTAACACCTGTACTGAAAGACTCAAGCTTTTTGCAGCAG          | 16615 |
| gb:MT093571 | Organism: Severe | ATGCTGGTGATTACATTTTAGCTAACACCTGTACTGAAAGACTCAAGCTTTTTGCAGCAG          | 16642 |
| gb:MT039887 | Organism: Severe | ATGCTGGTGATTACATTTTAGCTAACACCTGTACTGAAAGACTCAAGCTTTTTGCAGCAG          | 16642 |
| gb:MT019530 | Organism: Severe | ATGCTGGTGATTACATTTTAGCTAACACCTGTACTGAAAGACTCAAGCTTTTTGCAGCAG          | 16642 |
| gb:MT039888 | Organism: Severe | ATGCTGGTGATTACATTTTAGCTAACACCTGTACTGAAAGACTCAAGCTTTTTGCAGCAG          | 16642 |
| gb:LC522972 | Organism: Severe | ATGCTGGTGATTACATTTTAGCTAACACCTGTACTGAAAGACTCAAGCTTTTTGCAGCAG          | 16639 |
| gb:MT027063 | Organism: Severe | ATGCTGGTGATTACATTTTAGCTAACACCTGTACTGAAAGACTCAAGCTTTTTGCAGCAG          | 16642 |
| gb:MT027062 | Organism: Severe | ATGCTGGTGATTACATTTTAGCTAACACCTGTACTGAAAGACTCAAGCTTTTTGCAGCAG          | 16642 |
| gb:MT019529 | Organism: Severe | ATGCTGGTGATTACATTTTAGCTAACACCTGTACTGAAAGACTCAAGCTTTTTGCAGCAG          | 16642 |
| gb:MN996529 | Organism: Severe | ATGCTGGTGATTACATTTTAGCTAACACCTGTACTGAAAGACTCAAGCTTTTTGCAGCAG          | 16630 |
| gb:MN996531 | Organism: Severe | ATGCTGGTGATTACATTTTAGCTAACACCTGTACTGAAAGACTCAAGCTTTTTGCAGCAG          | 16629 |
| gb:MT066176 | Organism: Severe | ATGCTGGTGATTACATTTTAGCTAACACCTGTACTGAAAGACTCAAGCTTTTTGCAGCAG          | 16642 |
| gb:MT027064 | Organism: Severe | ATGCTGGTGATTACATTTTAGCTAACACCTGTACTGAAAGACTCAAGCTTTTTGCAGCAG          | 16642 |
| gb:MN994468 | Organism: Severe | ATGCTGGTGATTACATTTTAGCTAACACCTGTACTGAAAGACTCAAGCTTTTTGCAGCAG          | 16642 |
| gb:MT072688 | Organism: Severe | ATGCTGGTGATTACATTTTAGCTAACACCTGTACTGAAAGACTCAAGCTTTTTGCAGCAG          | 16627 |
| gb:MN996527 | Organism: Severe | ATGCTGGTGATTACATTTTAGCTAACACCTGTACTGAAAGACTCAAGCTTTTTGCAGCAG          | 16609 |
| gb:MT093631 | Organism: Severe | ATGCTGGTGATTACATTTTAGCTAACACCTGTACTGAAAGACTCAAGCTTTTTGCAGCAG          | 16680 |
| gb:MT106053 | Organism: Severe | ATGCTGGTGATTACATTTTAGCTAACACCTGTACTGAAAGACTCAAGCTTTTTGCAGCAG          | 16642 |
| gb:MT019533 | Organism: Severe | ATGCTGGTGATTACATTTTAGCTAACACCTGTACTGAAAGACTCAAGCTTTTTGCAGCAG          | 16642 |
| gb:MT019531 | Organism: Severe | ATGCTGGTGATTACATTTTAGCTAACACCTGTACTGAAAGACTCAAGCTTTTTGCAGCAG          | 16642 |
| gb:MN996528 | Organism: Severe | ATGCTGGTGATTACATTTTAGCTAACACCTGTACTGAAAGACTCAAGCTTTTTGCAGCAG          | 16642 |
| gb:MN996530 | Organism: Severe | ATGCTGGTGATTACATTTTAGCTAACACCTGTACTGAAAGACTCAAGCTTTTTGCAGCAG          | 16628 |
| gb:MN908947 | Organism: Severe | ATGCTGGTGATTACATTTTAGCTAACACCTGTACTGAAAGACTCAAGCTTTTTGCAGCAG          | 16642 |
| gb:MT019532 | Organism: Severe | ATGCTGGTGATTACATTTTAGCTAACACCTGTACTGAAAGACTCAAGCTTTTTGCAGCAG<br>***** | 16642 |
| gb:MT020781 | Organism: Severe | AAACGCTCAAAGCTACTGAGGAGACATTTAAACTGTCTTATGGTATTGCTACTGTACGTG          | 16690 |
| gb:MT007544 | Organism: Severe | AAACGCTCAAAGCTACTGAGGAGACATTTAAACTGTCTTATGGTATTGCTACTGTACGTG          | 16702 |
| gb:MN994467 | Organism: Severe | AAACGCTCAAAGCTACTGAGGAGACATTTAAACTGTCTTATGGTATTGCTACTGTACGTG          | 16702 |
| gb:MT044257 | Organism: Severe | AAACGCTCAAAGCTACTGAGGAGACATTTAAACTGTCTTATGGTATTGCTACTGTACGTG          | 16702 |
| gb:MT106054 | Organism: Severe | AAACGCTCAAAGCTACTGAGGAGACATTTAAACTGTCTTATGGTATTGCTACTGTACGTG          | 16702 |
| gb:MT049951 | Organism: Severe | AAACGCTCAAAGCTACTGAGGAGACATTTAAACTGTCTTATGGTATTGCTACTGTACGTG          | 16702 |
| gb:MN975262 | Organism: Severe | AAACGCTCAAAGCTACTGAGGAGACATTTAAACTGTCTTATGGTATTGCTACTGTACGTG          | 16702 |
| gb:MT106052 | Organism: Severe | AAACGCTCAAAGCTACTGAGGAGACATTTAAACTGTCTTATGGTATTGCTACTGTACGTG          | 16702 |
| gb:LC522975 | Organism: Severe | AAACGCTCAAAGCTACTGAGGAGACATTTAAACTGTCTTATGGTATTGCTACTGTACGTG          | 16699 |
| gb:LC522973 | Organism: Severe | AAACGCTCAAAGCTACTGAGGAGACATTTAAACTGTCTTATGGTATTGCTACTGTACGTG          | 16699 |
| gb:LC522974 | Organism: Severe | AAACGCTCAAAGCTACTGAGGAGACATTTAAACTGTCTTATGGTATTGCTACTGTACGTG          | 16699 |
| gb:MN985325 | Organism: Severe | AAACGCTCAAAGCTACTGAGGAGACATTTAAACTGTCTTATGGTATTGCTACTGTACGTG          | 16702 |
| gb:MT020881 | Organism: Severe | AAACGCTCAAAGCTACTGAGGAGACATTTAAACTGTCTTATGGTATTGCTACTGTACGTG          | 16702 |

|             |                 |                                                             |       |
|-------------|-----------------|-------------------------------------------------------------|-------|
| gb:MT020880 | Organism:Severe | AAACGCTCAAAGCTACTGAGGAGACATTTAAACTGCTTATGGTATTGCTACTGTACGTG | 16702 |
| gb:MT066175 | Organism:Severe | AAACGCTCAAAGCTACTGAGGAGACATTTAAACTGCTTATGGTATTGCTACTGTACGTG | 16702 |
| gb:MN997409 | Organism:Severe | AAACGCTCAAAGCTACTGAGGAGACATTTAAACTGCTTATGGTATTGCTACTGTACGTG | 16702 |
| gb:MN938384 | Organism:Severe | AAACGCTCAAAGCTACTGAGGAGACATTTAAACTGCTTATGGTATTGCTACTGTACGTG | 16670 |
| gb:MT044258 | Organism:Severe | AAACGCTCAAAGCTACTGAGGAGACATTTAAACTGCTTATGGTATTGCTACTGTACGTG | 16678 |
| gb:MT039890 | Organism:Severe | AAACGCTCAAAGCTACTGAGGAGACATTTAAACTGCTTATGGTATTGCTACTGTACGTG | 16702 |
| gb:MN988713 | Organism:Severe | AAACGCTCAAAGCTACTGAGGAGACATTTAAACTGCTTATGGTATTGCTACTGTACGTG | 16702 |
| gb:LC521925 | Organism:Severe | AAACGCTCAAAGCTACTGAGGAGACATTTAAACTGCTTATGGTATTGCTACTGTACGTG | 16675 |
| gb:MT093571 | Organism:Severe | AAACGCTCAAAGCTACTGAGGAGACATTTAAACTGCTTATGGTATTGCTACTGTACGTG | 16702 |
| gb:MT039887 | Organism:Severe | AAACGCTCAAAGCTACTGAGGAGACATTTAAACTGCTTATGGTATTGCTACTGTACGTG | 16702 |
| gb:MT019530 | Organism:Severe | AAACGCTCAAAGCTACTGAGGAGACATTTAAACTGCTTATGGTATTGCTACTGTACGTG | 16702 |
| gb:MT039888 | Organism:Severe | AAACGCTCAAAGCTACTGAGGAGACATTTAAACTGCTTATGGTATTGCTACTGTACGTG | 16702 |
| gb:LC522972 | Organism:Severe | AAACGCTCAAAGCTACTGAGGAGACATTTAAACTGCTTATGGTATTGCTACTGTACGTG | 16699 |
| gb:MT027063 | Organism:Severe | AAACGCTCAAAGCTACTGAGGAGACATTTAAACTGCTTATGGTATTGCTACTGTACGTG | 16702 |
| gb:MT027062 | Organism:Severe | AAACGCTCAAAGCTACTGAGGAGACATTTAAACTGCTTATGGTATTGCTACTGTACGTG | 16702 |
| gb:MT019529 | Organism:Severe | AAACGCTCAAAGCTACTGAGGAGACATTTAAACTGCTTATGGTATTGCTACTGTACGTG | 16702 |
| gb:MN996529 | Organism:Severe | AAACGCTCAAAGCTACTGAGGAGACATTTAAACTGCTTATGGTATTGCTACTGTACGTG | 16690 |
| gb:MN996531 | Organism:Severe | AAACGCTCAAAGCTACTGAGGAGACATTTAAACTGCTTATGGTATTGCTACTGTACGTG | 16689 |
| gb:MT066176 | Organism:Severe | AAACGCTCAAAGCTACTGAGGAGACATTTAAACTGCTTATGGTATTGCTACTGTACGTG | 16702 |
| gb:MT027064 | Organism:Severe | AAACGCTCAAAGCTACTGAGGAGACATTTAAACTGCTTATGGTATTGCTACTGTACGTG | 16702 |
| gb:MN994468 | Organism:Severe | AAACGCTCAAAGCTACTGAGGAGACATTTAAACTGCTTATGGTATTGCTACTGTACGTG | 16702 |
| gb:MT072688 | Organism:Severe | AAACGCTCAAAGCTACTGAGGAGACATTTAAACTGCTTATGGTATTGCTACTGTACGTG | 16687 |
| gb:MN996527 | Organism:Severe | AAACGCTCAAAGCTACTGAGGAGACATTTAAACTGCTTATGGTATTGCTACTGTACGTG | 16669 |
| gb:MT093631 | Organism:Severe | AAACGCTCAAAGCTACTGAGGAGACATTTAAACTGCTTATGGTATTGCTACTGTACGTG | 16740 |
| gb:MT106053 | Organism:Severe | AAACGCTCAAAGCTACTGAGGAGACATTTAAACTGCTTATGGTATTGCTACTGTACGTG | 16702 |
| gb:MT019533 | Organism:Severe | AAACGCTCAAAGCTACTGAGGAGACATTTAAACTGCTTATGGTATTGCTACTGTACGTG | 16702 |
| gb:MT019531 | Organism:Severe | AAACGCTCAAAGCTACTGAGGAGACATTTAAACTGCTTATGGTATTGCTACTGTACGTG | 16702 |
| gb:MN996528 | Organism:Severe | AAACGCTCAAAGCTACTGAGGAGACATTTAAACTGCTTATGGTATTGCTACTGTACGTG | 16702 |
| gb:MN996530 | Organism:Severe | AAACGCTCAAAGCTACTGAGGAGACATTTAAACTGCTTATGGTATTGCTACTGTACGTG | 16688 |
| gb:MN908947 | Organism:Severe | AAACGCTCAAAGCTACTGAGGAGACATTTAAACTGCTTATGGTATTGCTACTGTACGTG | 16702 |
| gb:MT019532 | Organism:Severe | AAACGCTCAAAGCTACTGAGGAGACATTTAAACTGCTTATGGTATTGCTACTGTACGTG | 16702 |

\*\*\*\*\*

|             |                 |                                                               |       |
|-------------|-----------------|---------------------------------------------------------------|-------|
| gb:MT020781 | Organism:Severe | AAGTGCTGTCTGACAGAGAATTACATCTTTTCATGGGAAGTTGGTAAACCTAGACCACCAC | 16750 |
| gb:MT007544 | Organism:Severe | AAGTGCTGTCTGACAGAGAATTACATCTTTTCATGGGAAGTTGGTAAACCTAGACCACCAC | 16762 |
| gb:MN994467 | Organism:Severe | AAGTGCTGTCTGACAGAGAATTACATCTTTTCATGGGAAGTTGGTAAACCTAGACCACCAC | 16762 |
| gb:MT044257 | Organism:Severe | AAGTGCTGTCTGACAGAGAATTACATCTTTTCATGGGAAGTTGGTAAACCTAGACCACCAC | 16762 |
| gb:MT106054 | Organism:Severe | AAGTGCTGTCTGACAGAGAATTACATCTTTTCATGGGAAGTTGGTAAACCTAGACCACCAC | 16762 |
| gb:MT049951 | Organism:Severe | AAGTGCTGTCTGACAGAGAATTACATCTTTTCATGGGAAGTTGGTAAACCTAGACCACCAC | 16762 |
| gb:MN975262 | Organism:Severe | AAGTGCTGTCTGACAGAGAATTACATCTTTTCATGGGAAGTTGGTAAACCTAGACCACCAC | 16762 |
| gb:MT106052 | Organism:Severe | AAGTGCTGTCTGACAGAGAATTACATCTTTTCATGGGAAGTTGGTAAACCTAGACCACCAC | 16762 |
| gb:LC522975 | Organism:Severe | AAGTGCTGTCTGACAGAGAATTACATCTTTTCATGGGAAGTTGGTAAACCTAGACCACCAC | 16759 |
| gb:LC522973 | Organism:Severe | AAGTGCTGTCTGACAGAGAATTACATCTTTTCATGGGAAGTTGGTAAACCTAGACCACCAC | 16759 |
| gb:LC522974 | Organism:Severe | AAGTGCTGTCTGACAGAGAATTACATCTTTTCATGGGAAGTTGGTAAACCTAGACCACCAC | 16759 |
| gb:MN985325 | Organism:Severe | AAGTGCTGTCTGACAGAGAATTACATCTTTTCATGGGAAGTTGGTAAACCTAGACCACCAC | 16762 |
| gb:MT020881 | Organism:Severe | AAGTGCTGTCTGACAGAGAATTACATCTTTTCATGGGAAGTTGGTAAACCTAGACCACCAC | 16762 |
| gb:MT020880 | Organism:Severe | AAGTGCTGTCTGACAGAGAATTACATCTTTTCATGGGAAGTTGGTAAACCTAGACCACCAC | 16762 |
| gb:MT066175 | Organism:Severe | AAGTGCTGTCTGACAGAGAATTACATCTTTTCATGGGAAGTTGGTAAACCTAGACCACCAC | 16762 |
| gb:MN997409 | Organism:Severe | AAGTGCTGTCTGACAGAGAATTACATCTTTTCATGGGAAGTTGGTAAACCTAGACCACCAC | 16762 |
| gb:MN938384 | Organism:Severe | AAGTGCTGTCTGACAGAGAATTACATCTTTTCATGGGAAGTTGGTAAACCTAGACCACCAC | 16730 |
| gb:MT044258 | Organism:Severe | AAGTGCTGTCTGACAGAGAATTACATCTTTTCATGGGAAGTTGGTAAACCTAGACCACCAC | 16738 |
| gb:MT039890 | Organism:Severe | AAGTGCTGTCTGACAGAGAATTACATCTTTTCATGGGAAGTTGGTAAACCTAGACCACCAC | 16762 |
| gb:MN988713 | Organism:Severe | AAGTGCTGTCTGACAGAGAATTACATCTTTTCATGGGAAGTTGGTAAACCTAGACCACCAC | 16762 |
| gb:LC521925 | Organism:Severe | AAGTGCTGTCTGACAGAGAATTACATCTTTTCATGGGAAGTTGGTAAACCTAGACCACCAC | 16735 |
| gb:MT093571 | Organism:Severe | AAGTGCTGTCTGACAGAGAATTACATCTTTTCATGGGAAGTTGGTAAACCTAGACCACCAC | 16762 |
| gb:MT039887 | Organism:Severe | AAGTGCTGTCTGACAGAGAATTACATCTTTTCATGGGAAGTTGGTAAACCTAGACCACCAC | 16762 |
| gb:MT019530 | Organism:Severe | AAGTGCTGTCTGACAGAGAATTACATCTTTTCATGGGAAGTTGGTAAACCTAGACCACCAC | 16762 |
| gb:MT039888 | Organism:Severe | AAGTGCTGTCTGACAGAGAATTACATCTTTTCATGGGAAGTTGGTAAACCTAGACCACCAC | 16762 |
| gb:LC522972 | Organism:Severe | AAGTGCTGTCTGACAGAGAATTACATCTTTTCATGGGAAGTTGGTAAACCTAGACCACCAC | 16759 |
| gb:MT027063 | Organism:Severe | AAGTGCTGTCTGACAGAGAATTACATCTTTTCATGGGAAGTTGGTAAACCTAGACCACCAC | 16762 |
| gb:MT027062 | Organism:Severe | AAGTGCTGTCTGACAGAGAATTACATCTTTTCATGGGAAGTTGGTAAACCTAGACCACCAC | 16762 |
| gb:MT019529 | Organism:Severe | AAGTGCTGTCTGACAGAGAATTACATCTTTTCATGGGAAGTTGGTAAACCTAGACCACCAC | 16762 |
| gb:MN996529 | Organism:Severe | AAGTGCTGTCTGACAGAGAATTACATCTTTTCATGGGAAGTTGGTAAACCTAGACCACCAC | 16750 |
| gb:MN996531 | Organism:Severe | AAGTGCTGTCTGACAGAGAATTACATCTTTTCATGGGAAGTTGGTAAACCTAGACCACCAC | 16749 |
| gb:MT066176 | Organism:Severe | AAGTGCTGTCTGACAGAGAATTACATCTTTTCATGGGAAGTTGGTAAACCTAGACCACCAC | 16762 |

|             |                 |                                                                |       |
|-------------|-----------------|----------------------------------------------------------------|-------|
| gb:MT027064 | Organism:Severe | AAGTGTCTGTCTGACAGAGAATTACATCTTTTCATGGGAAGTTGGTAAACCTAGACCACCAC | 16762 |
| gb:MN994468 | Organism:Severe | AAGTGTCTGTCTGACAGAGAATTACATCTTTTCATGGGAAGTTGGTAAACCTAGACCACCAC | 16762 |
| gb:MT072688 | Organism:Severe | AAGTGTCTGTCTGACAGAGAATTACATCTTTTCATGGGAAGTTGGTAAACCTAGACCACCAC | 16747 |
| gb:MN996527 | Organism:Severe | AAGTGTCTGTCTGACAGAGAATTACATCTTTTCATGGGAAGTTGGTAAACCTAGACCACCAC | 16729 |
| gb:MT093631 | Organism:Severe | AAGTGTCTGTCTGACAGAGAATTACATCTTTTCATGGGAAGTTGGTAAACCTAGACCACCAC | 16800 |
| gb:MT106053 | Organism:Severe | AAGTGTCTGTCTGACAGAGAATTACATCTTTTCATGGGAAGTTGGTAAACCTAGACCACCAC | 16762 |
| gb:MT019533 | Organism:Severe | AAGTGTCTGTCTGACAGAGAATTACATCTTTTCATGGGAAGTTGGTAAACCTAGACCACCAC | 16762 |
| gb:MT019531 | Organism:Severe | AAGTGTCTGTCTGACAGAGAATTACATCTTTTCATGGGAAGTTGGTAAACCTAGACCACCAC | 16762 |
| gb:MN996528 | Organism:Severe | AAGTGTCTGTCTGACAGAGAATTACATCTTTTCATGGGAAGTTGGTAAACCTAGACCACCAC | 16762 |
| gb:MN996530 | Organism:Severe | AAGTGTCTGTCTGACAGAGAATTACATCTTTTCATGGGAAGTTGGTAAACCTAGACCACCAC | 16748 |
| gb:MN908947 | Organism:Severe | AAGTGTCTGTCTGACAGAGAATTACATCTTTTCATGGGAAGTTGGTAAACCTAGACCACCAC | 16762 |
| gb:MT019532 | Organism:Severe | AAGTGTCTGTCTGACAGAGAATTACATCTTTTCATGGGAAGTTGGTAAACCTAGACCACCAC | 16762 |

\*\*\*\*\*

|             |                 |                                                           |       |
|-------------|-----------------|-----------------------------------------------------------|-------|
| gb:MT020781 | Organism:Severe | TTAACCGAAATTATGCTTTACTGGTTATCGTGTAACAAAAACAGTAAAGTACAATAG | 16810 |
| gb:MT007544 | Organism:Severe | TTAACCGAAATTATGCTTTACTGGTTATCGTGTAACAAAAACAGTAAAGTACAATAG | 16822 |
| gb:MN994467 | Organism:Severe | TTAACCGAAATTATGCTTTACTGGTTATCGTGTAACAAAAACAGTAAAGTACAATAG | 16822 |
| gb:MT044257 | Organism:Severe | TTAACCGAAATTATGCTTTACTGGTTATCGTGTAACAAAAACAGTAAAGTACAATAG | 16822 |
| gb:MT106054 | Organism:Severe | TTAACCGAAATTATGCTTTACTGGTTATCGTGTAACAAAAACAGTAAAGTACAATAG | 16822 |
| gb:MT049951 | Organism:Severe | TTAACCGAAATTATGCTTTACTGGTTATCGTGTAACAAAAACAGTAAAGTACAATAG | 16822 |
| gb:MN975262 | Organism:Severe | TTAACCGAAATTATGCTTTACTGGTTATCGTGTAACAAAAACAGTAAAGTACAATAG | 16822 |
| gb:MT106052 | Organism:Severe | TTAACCGAAATTATGCTTTACTGGTTATCGTGTAACAAAAACAGTAAAGTACAATAG | 16822 |
| gb:LC522975 | Organism:Severe | TTAACCGAAATTATGCTTTACTGGTTATCGTGTAACAAAAACAGTAAAGTACAATAG | 16819 |
| gb:LC522973 | Organism:Severe | TTAACCGAAATTATGCTTTACTGGTTATCGTGTAACAAAAACAGTAAAGTACAATAG | 16819 |
| gb:LC522974 | Organism:Severe | TTAACCGAAATTATGCTTTACTGGTTATCGTGTAACAAAAACAGTAAAGTACAATAG | 16819 |
| gb:MN985325 | Organism:Severe | TTAACCGAAATTATGCTTTACTGGTTATCGTGTAACAAAAACAGTAAAGTACAATAG | 16822 |
| gb:MT020881 | Organism:Severe | TTAACCGAAATTATGCTTTACTGGTTATCGTGTAACAAAAACAGTAAAGTACAATAG | 16822 |
| gb:MT020880 | Organism:Severe | TTAACCGAAATTATGCTTTACTGGTTATCGTGTAACAAAAACAGTAAAGTACAATAG | 16822 |
| gb:MT066175 | Organism:Severe | TTAACCGAAATTATGCTTTACTGGTTATCGTGTAACAAAAACAGTAAAGTACAATAG | 16822 |
| gb:MN997409 | Organism:Severe | TTAACCGAAATTATGCTTTACTGGTTATCGTGTAACAAAAACAGTAAAGTACAATAG | 16822 |
| gb:MN938384 | Organism:Severe | TTAACCGAAATTATGCTTTACTGGTTATCGTGTAACAAAAACAGTAAAGTACAATAG | 16790 |
| gb:MT044258 | Organism:Severe | TTAACCGAAATTATGCTTTACTGGTTATCGTGTAACAAAAACAGTAAAGTACAATAG | 16798 |
| gb:MT039890 | Organism:Severe | TTAACCGAAATTATGCTTTACTGGTTATCGTGTAACAAAAACAGTAAAGTACAATAG | 16822 |
| gb:MN988713 | Organism:Severe | TTAACCGAAATTATGCTTTACTGGTTATCGTGTAACAAAAACAGTAAAGTACAATAG | 16822 |
| gb:LC521925 | Organism:Severe | TTAACCGAAATTATGCTTTACTGGTTATCGTGTAACAAAAACAGTAAAGTACAATAG | 16795 |
| gb:MT093571 | Organism:Severe | TTAACCGAAATTATGCTTTACTGGTTATCGTGTAACAAAAACAGTAAAGTACAATAG | 16822 |
| gb:MT039887 | Organism:Severe | TTAACCGAAATTATGCTTTACTGGTTATCGTGTAACAAAAACAGTAAAGTACAATAG | 16822 |
| gb:MT019530 | Organism:Severe | TTAACCGAAATTATGCTTTACTGGTTATCGTGTAACAAAAACAGTAAAGTACAATAG | 16822 |
| gb:MT039888 | Organism:Severe | TTAACCGAAATTATGCTTTACTGGTTATCGTGTAACAAAAACAGTAAAGTACAATAG | 16822 |
| gb:LC522972 | Organism:Severe | TTAACCGAAATTATGCTTTACTGGTTATCGTGTAACAAAAACAGTAAAGTACAATAG | 16819 |
| gb:MT027063 | Organism:Severe | TTAACCGAAATTATGCTTTACTGGTTATCGTGTAACAAAAACAGTAAAGTACAATAG | 16822 |
| gb:MT027062 | Organism:Severe | TTAACCGAAATTATGCTTTACTGGTTATCGTGTAACAAAAACAGTAAAGTACAATAG | 16822 |
| gb:MT019529 | Organism:Severe | TTAACCGAAATTATGCTTTACTGGTTATCGTGTAACAAAAACAGTAAAGTACAATAG | 16822 |
| gb:MN996529 | Organism:Severe | TTAACCGAAATTATGCTTTACTGGTTATCGTGTAACAAAAACAGTAAAGTACAATAG | 16810 |
| gb:MN996531 | Organism:Severe | TTAACCGAAATTATGCTTTACTGGTTATCGTGTAACAAAAACAGTAAAGTACAATAG | 16809 |
| gb:MT066176 | Organism:Severe | TTAACCGAAATTATGCTTTACTGGTTATCGTGTAACAAAAACAGTAAAGTACAATAG | 16822 |
| gb:MT027064 | Organism:Severe | TTAACCGAAATTATGCTTTACTGGTTATCGTGTAACAAAAACAGTAAAGTACAATAG | 16822 |
| gb:MN994468 | Organism:Severe | TTAACCGAAATTATGCTTTACTGGTTATCGTGTAACAAAAACAGTAAAGTACAATAG | 16822 |
| gb:MT072688 | Organism:Severe | TTAACCGAAATTATGCTTTACTGGTTATCGTGTAACAAAAACAGTAAAGTACAATAG | 16807 |
| gb:MN996527 | Organism:Severe | TTAACCGAAATTATGCTTTACTGGTTATCGTGTAACAAAAACAGTAAAGTACAATAG | 16789 |
| gb:MT093631 | Organism:Severe | TTAACCGAAATTATGCTTTACTGGTTATCGTGTAACAAAAACAGTAAAGTACAATAG | 16860 |
| gb:MT106053 | Organism:Severe | TTAACCGAAATTATGCTTTACTGGTTATCGTGTAACAAAAACAGTAAAGTACAATAG | 16822 |
| gb:MT019533 | Organism:Severe | TTAACCGAAATTATGCTTTACTGGTTATCGTGTAACAAAAACAGTAAAGTACAATAG | 16822 |
| gb:MT019531 | Organism:Severe | TTAACCGAAATTATGCTTTACTGGTTATCGTGTAACAAAAACAGTAAAGTACAATAG | 16822 |
| gb:MN996528 | Organism:Severe | TTAACCGAAATTATGCTTTACTGGTTATCGTGTAACAAAAACAGTAAAGTACAATAG | 16822 |
| gb:MN996530 | Organism:Severe | TTAACCGAAATTATGCTTTACTGGTTATCGTGTAACAAAAACAGTAAAGTACAATAG | 16808 |
| gb:MN908947 | Organism:Severe | TTAACCGAAATTATGCTTTACTGGTTATCGTGTAACAAAAACAGTAAAGTACAATAG | 16822 |
| gb:MT019532 | Organism:Severe | TTAACCGAAATTATGCTTTACTGGTTATCGTGTAACAAAAACAGTAAAGTACAATAG | 16822 |

\*\*\*\*\*

|             |                 |                                                              |       |
|-------------|-----------------|--------------------------------------------------------------|-------|
| gb:MT020781 | Organism:Severe | GAGAGTACACCTTTGAAAAAGGTGACTATGGTGATGCTGTTGTTTACCGAGGTACAACAA | 16870 |
| gb:MT007544 | Organism:Severe | GAGAGTACACCTTTGAAAAAGGTGACTATGGTGATGCTGTTGTTTACCGAGGTACAACAA | 16882 |
| gb:MN994467 | Organism:Severe | GAGAGTACACCTTTGAAAAAGGTGACTATGGTGATGCTGTTGTTTACCGAGGTACAACAA | 16882 |
| gb:MT044257 | Organism:Severe | GAGAGTACACCTTTGAAAAAGGTGACTATGGTGATGCTGTTGTTTACCGAGGTACAACAA | 16882 |
| gb:MT106054 | Organism:Severe | GAGAGTACACCTTTGAAAAAGGTGACTATGGTGATGCTGTTGTTTACCGAGGTACAACAA | 16882 |



|             |                 |                                                              |       |
|-------------|-----------------|--------------------------------------------------------------|-------|
| gb:MT049951 | Organism:Severe | GAGAGTACACCTTTGAAAAAGGTGACTATGGTGATGCTGTTGTTTACCGAGGTACAACAA | 16882 |
| gb:MN975262 | Organism:Severe | GAGAGTACACCTTTGAAAAAGGTGACTATGGTGATGCTGTTGTTTACCGAGGTACAACAA | 16882 |
| gb:MT106052 | Organism:Severe | GAGAGTACACCTTTGAAAAAGGTGACTATGGTGATGCTGTTGTTTACCGAGGTACAACAA | 16882 |
| gb:LC522975 | Organism:Severe | GAGAGTACACCTTTGAAAAAGGTGACTATGGTGATGCTGTTGTTTACCGAGGTACAACAA | 16879 |
| gb:LC522973 | Organism:Severe | GAGAGTACACCTTTGAAAAAGGTGACTATGGTGATGCTGTTGTTTACCGAGGTACAACAA | 16879 |
| gb:LC522974 | Organism:Severe | GAGAGTACACCTTTGAAAAAGGTGACTATGGTGATGCTGTTGTTTACCGAGGTACAACAA | 16879 |
| gb:MN985325 | Organism:Severe | GAGAGTACACCTTTGAAAAAGGTGACTATGGTGATGCTGTTGTTTACCGAGGTACAACAA | 16882 |
| gb:MT020881 | Organism:Severe | GAGAGTACACCTTTGAAAAAGGTGACTATGGTGATGCTGTTGTTTACCGAGGTACAACAA | 16882 |
| gb:MT020880 | Organism:Severe | GAGAGTACACCTTTGAAAAAGGTGACTATGGTGATGCTGTTGTTTACCGAGGTACAACAA | 16882 |
| gb:MT066175 | Organism:Severe | GAGAGTACACCTTTGAAAAAGGTGACTATGGTGATGCTGTTGTTTACCGAGGTACAACAA | 16882 |
| gb:MN997409 | Organism:Severe | GAGAGTACACCTTTGAAAAAGGTGACTATGGTGATGCTGTTGTTTACCGAGGTACAACAA | 16882 |
| gb:MN938384 | Organism:Severe | GAGAGTACACCTTTGAAAAAGGTGACTATGGTGATGCTGTTGTTTACCGAGGTACAACAA | 16850 |
| gb:MT044258 | Organism:Severe | GAGAGTACACCTTTGAAAAAGGTGACTATGGTGATGCTGTTGTTTACCGAGGTACAACAA | 16858 |
| gb:MT039890 | Organism:Severe | GAGAGTACACCTTTGAAAAAGGTGACTATGGTGATGCTGTTGTTTACCGAGGTACAACAA | 16882 |
| gb:MN988713 | Organism:Severe | GAGAGTACACCTTTGAAAAAGGTGACTATGGTGATGCTGTTGTTTACCGAGGTACAACAA | 16882 |
| gb:LC521925 | Organism:Severe | GAGAGTACACCTTTGAAAAAGGTGACTATGGTGATGCTGTTGTTTACCGAGGTACAACAA | 16855 |
| gb:MT093571 | Organism:Severe | GAGAGTACACCTTTGAAAAAGGTGACTATGGTGATGCTGTTGTTTACCGAGGTACAACAA | 16882 |
| gb:MT039887 | Organism:Severe | GAGAGTACACCTTTGAAAAAGGTGACTATGGTGATGCTGTTGTTTACCGAGGTACAACAA | 16882 |
| gb:MT019530 | Organism:Severe | GAGAGTACACCTTTGAAAAAGGTGACTATGGTGATGCTGTTGTTTACCGAGGTACAACAA | 16882 |
| gb:MT039888 | Organism:Severe | GAGAGTACACCTTTGAAAAAGGTGACTATGGTGATGCTGTTGTTTACCGAGGTACAACAA | 16882 |
| gb:LC522972 | Organism:Severe | GAGAGTACACCTTTGAAAAAGGTGACTATGGTGATGCTGTTGTTTACCGAGGTACAACAA | 16879 |
| gb:MT027063 | Organism:Severe | GAGAGTACACCTTTGAAAAAGGTGACTATGGTGATGCTGTTGTTTACCGAGGTACAACAA | 16882 |
| gb:MT027062 | Organism:Severe | GAGAGTACACCTTTGAAAAAGGTGACTATGGTGATGCTGTTGTTTACCGAGGTACAACAA | 16882 |
| gb:MT019529 | Organism:Severe | GAGAGTACACCTTTGAAAAAGGTGACTATGGTGATGCTGTTGTTTACCGAGGTACAACAA | 16882 |
| gb:MN996529 | Organism:Severe | GAGAGTACACCTTTGAAAAAGGTGACTATGGTGATGCTGTTGTTTACCGAGGTACAACAA | 16870 |
| gb:MN996531 | Organism:Severe | GAGAGTACACCTTTGAAAAAGGTGACTATGGTGATGCTGTTGTTTACCGAGGTACAACAA | 16869 |
| gb:MT066176 | Organism:Severe | GAGAGTACACCTTTGAAAAAGGTGACTATGGTGATGCTGTTGTTTACCGAGGTACAACAA | 16882 |
| gb:MT027064 | Organism:Severe | GAGAGTACACCTTTGAAAAAGGTGACTATGGTGATGCTGTTGTTTACCGAGGTACAACAA | 16882 |
| gb:MN994468 | Organism:Severe | GAGAGTACACCTTTGAAAAAGGTGACTATGGTGATGCTGTTGTTTACCGAGGTACAACAA | 16882 |
| gb:MT072688 | Organism:Severe | GAGAGTACACCTTTGAAAAAGGTGACTATGGTGATGCTGTTGTTTACCGAGGTACAACAA | 16867 |
| gb:MN996527 | Organism:Severe | GAGAGTACACCTTTGAAAAAGGTGACTATGGTGATGCTGTTGTTTACCGAGGTACAACAA | 16849 |
| gb:MT093631 | Organism:Severe | GAGAGTACACCTTTGAAAAAGGTGACTATGGTGATGCTGTTGTTTACCGAGGTACAACAA | 16920 |
| gb:MT106053 | Organism:Severe | GAGAGTACACCTTTGAAAAAGGTGACTATGGTGATGCTGTTGTTTACCGAGGTACAACAA | 16882 |
| gb:MT019533 | Organism:Severe | GAGAGTACACCTTTGAAAAAGGTGACTATGGTGATGCTGTTGTTTACCGAGGTACAACAA | 16882 |
| gb:MT019531 | Organism:Severe | GAGAGTACACCTTTGAAAAAGGTGACTATGGTGATGCTGTTGTTTACCGAGGTACAACAA | 16882 |
| gb:MN996528 | Organism:Severe | GAGAGTACACCTTTGAAAAAGGTGACTATGGTGATGCTGTTGTTTACCGAGGTACAACAA | 16882 |
| gb:MN996530 | Organism:Severe | GAGAGTACACCTTTGAAAAAGGTGACTATGGTGATGCTGTTGTTTACCGAGGTACAACAA | 16868 |
| gb:MN908947 | Organism:Severe | GAGAGTACACCTTTGAAAAAGGTGACTATGGTGATGCTGTTGTTTACCGAGGTACAACAA | 16882 |
| gb:MT019532 | Organism:Severe | GAGAGTACACCTTTGAAAAAGGTGACTATGGTGATGCTGTTGTTTACCGAGGTACAACAA | 16882 |

\*\*\*\*\*

|             |                 |                                                            |       |
|-------------|-----------------|------------------------------------------------------------|-------|
| gb:MT020781 | Organism:Severe | CTTACAAATTAATGTTGGTGATTATTTGTGCTGACATCACATACAGTAATGCCATTAA | 16930 |
| gb:MT007544 | Organism:Severe | CTTACAAATTAATGTTGGTGATTATTTGTGCTGACATCACATACAGTAATGCCATTAA | 16942 |
| gb:MN994467 | Organism:Severe | CTTACAAATTAATGTTGGTGATTATTTGTGCTGACATCACATACAGTAATGCCATTAA | 16942 |
| gb:MT044257 | Organism:Severe | CTTACAAATTAATGTTGGTGATTATTTGTGCTGACATCACATACAGTAATGCCATTAA | 16942 |
| gb:MT106054 | Organism:Severe | CTTACAAATTAATGTTGGTGATTATTTGTGCTGACATCACATACAGTAATGCCATTAA | 16942 |
| gb:MT049951 | Organism:Severe | CTTACAAATTAATGTTGGTGATTATTTGTGCTGACATCACATACAGTAATGCCATTAA | 16942 |
| gb:MN975262 | Organism:Severe | CTTACAAATTAATGTTGGTGATTATTTGTGCTGACATCACATACAGTAATGCCATTAA | 16942 |
| gb:MT106052 | Organism:Severe | CTTACAAATTAATGTTGGTGATTATTTGTGCTGACATCACATACAGTAATGCCATTAA | 16942 |
| gb:LC522975 | Organism:Severe | CTTACAAATTAATGTTGGTGATTATTTGTGCTGACATCACATACAGTAATGCCATTAA | 16939 |
| gb:LC522973 | Organism:Severe | CTTACAAATTAATGTTGGTGATTATTTGTGCTGACATCACATACAGTAATGCCATTAA | 16939 |
| gb:LC522974 | Organism:Severe | CTTACAAATTAATGTTGGTGATTATTTGTGCTGACATCACATACAGTAATGCCATTAA | 16939 |
| gb:MN985325 | Organism:Severe | CTTACAAATTAATGTTGGTGATTATTTGTGCTGACATCACATACAGTAATGCCATTAA | 16942 |
| gb:MT020881 | Organism:Severe | CTTACAAATTAATGTTGGTGATTATTTGTGCTGACATCACATACAGTAATGCCATTAA | 16942 |
| gb:MT020880 | Organism:Severe | CTTACAAATTAATGTTGGTGATTATTTGTGCTGACATCACATACAGTAATGCCATTAA | 16942 |
| gb:MT066175 | Organism:Severe | CTTACAAATTAATGTTGGTGATTATTTGTGCTGACATCACATACAGTAATGCCATTAA | 16942 |
| gb:MN997409 | Organism:Severe | CTTACAAATTAATGTTGGTGATTATTTGTGCTGACATCACATACAGTAATGCCATTAA | 16942 |
| gb:MN938384 | Organism:Severe | CTTACAAATTAATGTTGGTGATTATTTGTGCTGACATCACATACAGTAATGCCATTAA | 16910 |
| gb:MT044258 | Organism:Severe | CTTACAAATTAATGTTGGTGATTATTTGTGCTGACATCACATACAGTAATGCCATTAA | 16918 |
| gb:MT039890 | Organism:Severe | CTTACAAATTAATGTTGGTGATTATTTGTGCTGACATCACATACAGTAATGCCATTAA | 16942 |
| gb:MN988713 | Organism:Severe | CTTACAAATTAATGTTGGTGATTATTTGTGCTGACATCACATACAGTAATGCCATTAA | 16942 |
| gb:LC521925 | Organism:Severe | CTTACAAATTAATGTTGGTGATTATTTGTGCTGACATCACATACAGTAATGCCATTAA | 16915 |
| gb:MT093571 | Organism:Severe | CTTACAAATTAATGTTGGTGATTATTTGTGCTGACATCACATACAGTAATGCCATTAA | 16942 |
| gb:MT039887 | Organism:Severe | CTTACAAATTAATGTTGGTGATTATTTGTGCTGACATCACATACAGTAATGCCATTAA | 16942 |
| gb:MT019530 | Organism:Severe | CTTACAAATTAATGTTGGTGATTATTTGTGCTGACATCACATACAGTAATGCCATTAA | 16942 |

|             |                  |                                                            |       |
|-------------|------------------|------------------------------------------------------------|-------|
| gb:MT039888 | Organism: Severe | CTTACAAATTAATGTTGGTGATTATTTGTGCTGACATCACATACAGTAATGCCATTAA | 16942 |
| gb:LC522972 | Organism: Severe | CTTACAAATTAATGTTGGTGATTATTTGTGCTGACATCACATACAGTAATGCCATTAA | 16939 |
| gb:MT027063 | Organism: Severe | CTTACAAATTAATGTTGGTGATTATTTGTGCTGACATCACATACAGTAATGCCATTAA | 16942 |
| gb:MT027062 | Organism: Severe | CTTACAAATTAATGTTGGTGATTATTTGTGCTGACATCACATACAGTAATGCCATTAA | 16942 |
| gb:MT019529 | Organism: Severe | CTTACAAATTAATGTTGGTGATTATTTGTGCTGACATCACATACAGTAATGCCATTAA | 16942 |
| gb:MN996529 | Organism: Severe | CTTACAAATTAATGTTGGTGATTATTTGTGCTGACATCACATACAGTAATGCCATTAA | 16930 |
| gb:MN996531 | Organism: Severe | CTTACAAATTAATGTTGGTGATTATTTGTGCTGACATCACATACAGTAATGCCATTAA | 16929 |
| gb:MT066176 | Organism: Severe | CTTACAAATTAATGTTGGTGATTATTTGTGCTGACATCACATACAGTAATGCCATTAA | 16942 |
| gb:MT027064 | Organism: Severe | CTTACAAATTAATGTTGGTGATTATTTGTGCTGACATCACATACAGTAATGCCATTAA | 16942 |
| gb:MN994468 | Organism: Severe | CTTACAAATTAATGTTGGTGATTATTTGTGCTGACATCACATACAGTAATGCCATTAA | 16942 |
| gb:MT072688 | Organism: Severe | CTTACAAATTAATGTTGGTGATTATTTGTGCTGACATCACATACAGTAATGCCATTAA | 16927 |
| gb:MN996527 | Organism: Severe | CTTACAAATTAATGTTGGTGATTATTTGTGCTGACATCACATACAGTAATGCCATTAA | 16909 |
| gb:MT093631 | Organism: Severe | CTTACAAATTAATGTTGGTGATTATTTGTGCTGACATCACATACAGTAATGCCATTAA | 16980 |
| gb:MT106053 | Organism: Severe | CTTACAAATTAATGTTGGTGATTATTTGTGCTGACATCACATACAGTAATGCCATTAA | 16942 |
| gb:MT019533 | Organism: Severe | CTTACAAATTAATGTTGGTGATTATTTGTGCTGACATCACATACAGTAATGCCATTAA | 16942 |
| gb:MT019531 | Organism: Severe | CTTACAAATTAATGTTGGTGATTATTTGTGCTGACATCACATACAGTAATGCCATTAA | 16942 |
| gb:MN996528 | Organism: Severe | CTTACAAATTAATGTTGGTGATTATTTGTGCTGACATCACATACAGTAATGCCATTAA | 16942 |
| gb:MN996530 | Organism: Severe | CTTACAAATTAATGTTGGTGATTATTTGTGCTGACATCACATACAGTAATGCCATTAA | 16928 |
| gb:MN908947 | Organism: Severe | CTTACAAATTAATGTTGGTGATTATTTGTGCTGACATCACATACAGTAATGCCATTAA | 16942 |
| gb:MT019532 | Organism: Severe | CTTACAAATTAATGTTGGTGATTATTTGTGCTGACATCACATACAGTAATGCCATTAA | 16942 |

\*\*\*\*\*

|             |                  |                                                              |       |
|-------------|------------------|--------------------------------------------------------------|-------|
| gb:MT020781 | Organism: Severe | GTGCACCTACACTAGTGCCACAAGAGCACTATGTTAGAATTACTGGCTTATACCCAACAC | 16990 |
| gb:MT007544 | Organism: Severe | GTGCACCTACACTAGTGCCACAAGAGCACTATGTTAGAATTACTGGCTTATACCCAACAC | 17002 |
| gb:MN994467 | Organism: Severe | GTGCACCTACACTAGTGCCACAAGAGCACTATGTTAGAATTACTGGCTTATACCCAACAC | 17002 |
| gb:MT044257 | Organism: Severe | GTGCACCTACACTAGTGCCACAAGAGCACTATGTTAGAATTACTGGCTTATACCCAACAC | 17002 |
| gb:MT106054 | Organism: Severe | GTGCACCTACACTAGTGCCACAAGAGCACTATGTTAGAATTACTGGCTTATACCCAACAC | 17002 |
| gb:MT049951 | Organism: Severe | GTGCACCTACACTAGTGCCACAAGAGCACTATGTTAGAATTACTGGCTTATACCCAACAC | 17002 |
| gb:MN975262 | Organism: Severe | GTGCACCTACACTAGTGCCACAAGAGCACTATGTTAGAATTACTGGCTTATACCCAACAC | 17002 |
| gb:MT106052 | Organism: Severe | GTGCACCTACACTAGTGCCACAAGAGCACTATGTTAGAATTACTGGCTTATACCCAACAC | 17002 |
| gb:LC522975 | Organism: Severe | GTGCACCTACACTAGTGCCACAAGAGCACTATGTTAGAATTACTGGCTTATACCCAACAC | 16999 |
| gb:LC522973 | Organism: Severe | GTGCACCTACACTAGTGCCACAAGAGCACTATGTTAGAATTACTGGCTTATACCCAACAC | 16999 |
| gb:LC522974 | Organism: Severe | GTGCACCTACACTAGTGCCACAAGAGCACTATGTTAGAATTACTGGCTTATACCCAACAC | 16999 |
| gb:MN985325 | Organism: Severe | GTGCACCTACACTAGTGCCACAAGAGCACTATGTTAGAATTACTGGCTTATACCCAACAC | 17002 |
| gb:MT020881 | Organism: Severe | GTGCACCTACACTAGTGCCACAAGAGCACTATGTTAGAATTACTGGCTTATACCCAACAC | 17002 |
| gb:MT020880 | Organism: Severe | GTGCACCTACACTAGTGCCACAAGAGCACTATGTTAGAATTACTGGCTTATACCCAACAC | 17002 |
| gb:MT066175 | Organism: Severe | GTGCACCTACACTAGTGCCACAAGAGCACTATGTTAGAATTACTGGCTTATACCCAACAC | 17002 |
| gb:MN997409 | Organism: Severe | GTGCACCTACACTAGTGCCACAAGAGCACTATGTTAGAATTACTGGCTTATACCCAACAC | 17002 |
| gb:MN938384 | Organism: Severe | GTGCACCTACACTAGTGCCACAAGAGCACTATGTTAGAATTACTGGCTTATACCCAACAC | 16970 |
| gb:MT044258 | Organism: Severe | GTGCACCTACACTAGTGCCACAAGAGCACTATGTTAGAATTACTGGCTTATACCCAACAC | 16978 |
| gb:MT039890 | Organism: Severe | GTGCACCTACACTAGTGCCACAAGAGCACTATGTTAGAATTACTGGCTTATACCCAACAC | 17002 |
| gb:MN988713 | Organism: Severe | GTGCACCTACACTAGTGCCACAAGAGCACTATGTTAGAATTACTGGCTTATACCCAACAC | 17002 |
| gb:LC521925 | Organism: Severe | GTGCACCTACACTAGTGCCACAAGAGCACTATGTTAGAATTACTGGCTTATACCCAACAC | 16975 |
| gb:MT093571 | Organism: Severe | GTGCACCTACACTAGTGCCACAAGAGCACTATGTTAGAATTACTGGCTTATACCCAACAC | 17002 |
| gb:MT039887 | Organism: Severe | GTGCACCTACACTAGTGCCACAAGAGCACTATGTTAGAATTACTGGCTTATACCCAACAC | 17002 |
| gb:MT019530 | Organism: Severe | GTGCACCTACACTAGTGCCACAAGAGCACTATGTTAGAATTACTGGCTTATACCCAACAC | 17002 |
| gb:MT039888 | Organism: Severe | GTGCACCTACACTAGTGCCACAAGAGCACTATGTTAGAATTACTGGCTTATACCCAACAC | 17002 |
| gb:LC522972 | Organism: Severe | GTGCACCTACACTAGTGCCACAAGAGCACTATGTTAGAATTACTGGCTTATACCCAACAC | 16999 |
| gb:MT027063 | Organism: Severe | GTGCACCTACACTAGTGCCACAAGAGCACTATGTTAGAATTACTGGCTTATACCCAACAC | 17002 |
| gb:MT027062 | Organism: Severe | GTGCACCTACACTAGTGCCACAAGAGCACTATGTTAGAATTACTGGCTTATACCCAACAC | 17002 |
| gb:MT019529 | Organism: Severe | GTGCACCTACACTAGTGCCACAAGAGCACTATGTTAGAATTACTGGCTTATACCCAACAC | 17002 |
| gb:MN996529 | Organism: Severe | GTGCACCTACACTAGTGCCACAAGAGCACTATGTTAGAATTACTGGCTTATACCCAACAC | 16990 |
| gb:MN996531 | Organism: Severe | GTGCACCTACACTAGTGCCACAAGAGCACTATGTTAGAATTACTGGCTTATACCCAACAC | 16989 |
| gb:MT066176 | Organism: Severe | GTGCACCTACACTAGTGCCACAAGAGCACTATGTTAGAATTACTGGCTTATACCCAACAC | 17002 |
| gb:MT027064 | Organism: Severe | GTGCACCTACACTAGTGCCACAAGAGCACTATGTTAGAATTACTGGCTTATACCCAACAC | 17002 |
| gb:MN994468 | Organism: Severe | GTGCACCTACACTAGTGCCACAAGAGCACTATGTTAGAATTACTGGCTTATACCCAATAC | 17002 |
| gb:MT072688 | Organism: Severe | GTGCACCTACACTAGTGCCACAAGAGCACTATGTTAGAATTACTGGCTTATACCCAACAC | 16987 |
| gb:MN996527 | Organism: Severe | GTGCACCTACACTAGTGCCACAAGAGCACTATGTTAGAATTACTGGCTTATACCCAACAC | 16969 |
| gb:MT093631 | Organism: Severe | GTGCACCTACACTAGTGCCACAAGAGCACTATGTTAGAATTACTGGCTTATACCCAACAC | 17040 |
| gb:MT106053 | Organism: Severe | GTGCACCTACACTAGTGCCACAAGAGCACTATGTTAGAATTACTGGCTTATACCCAACAC | 17002 |
| gb:MT019533 | Organism: Severe | GTGCACCTACACTAGTGCCACAAGAGCACTATGTTAGAATTACTGGCTTATACCCAACAC | 17002 |
| gb:MT019531 | Organism: Severe | GTGCACCTACACTAGTGCCACAAGAGCACTATGTTAGAATTACTGGCTTATACCCAACAC | 17002 |
| gb:MN996528 | Organism: Severe | GTGCACCTACACTAGTGCCACAAGAGCACTATGTTAGAATTACTGGCTTATACCCAACAC | 17002 |
| gb:MN996530 | Organism: Severe | GTGCACCTACACTAGTGCCACAAGAGCACTATGTTAGAATTACTGGCTTATACCCAACAC | 16988 |
| gb:MN908947 | Organism: Severe | GTGCACCTACACTAGTGCCACAAGAGCACTATGTTAGAATTACTGGCTTATACCCAACAC | 17002 |

|             |                  |                                                                       |       |
|-------------|------------------|-----------------------------------------------------------------------|-------|
| gb:MT019532 | Organism: Severe | GTGCACCTACACTAGTGCCACAAGAGCACTATGTTAGAATTACTGGCTTATACCCAACAC<br>***** | 17002 |
| gb:MT020781 | Organism: Severe | TCAATATCTCAGATGAGTTTTCTAGCAATGTTGCAAATTATCAAAGGTTGGTATGCAA            | 17050 |
| gb:MT007544 | Organism: Severe | TCAATATCTCAGATGAGTTTTCTAGCAATGTTGCAAATTATCAAAGGTTGGTATGCAA            | 17062 |
| gb:MN994467 | Organism: Severe | TCAATATCTCAGATGAGTTTTCTAGCAATGTTGCAAATTATCAAAGGTTGGTATGCAA            | 17062 |
| gb:MT044257 | Organism: Severe | TCAATATCTCAGATGAGTTTTCTAGCAATGTTGCAAATTATCAAAGGTTGGTATGCAA            | 17062 |
| gb:MT106054 | Organism: Severe | TCAATATCTCAGATGAGTTTTCTAGCAATGTTGCAAATTATCAAAGGTTGGTATGCAA            | 17062 |
| gb:MT049951 | Organism: Severe | TCAATATCTCAGATGAGTTTTCTAGCAATGTTGCAAATTATCAAAGGTTGGTATGCAA            | 17062 |
| gb:MN975262 | Organism: Severe | TCAATATCTCAGATGAGTTTTCTAGCAATGTTGCAAATTATCAAAGGTTGGTATGCAA            | 17062 |
| gb:MT106052 | Organism: Severe | TCAATATCTCAGATGAGTTTTCTAGCAATGTTGCAAATTATCAAAGGTTGGTATGCAA            | 17062 |
| gb:LC522975 | Organism: Severe | TCAATATCTCAGATGAGTTTTCTAGCAATGTTGCAAATTATCAAAGGTTGGTATGCAA            | 17059 |
| gb:LC522973 | Organism: Severe | TCAATATCTCAGATGAGTTTTCTAGCAATGTTGCAAATTATCAAAGGTTGGTATGCAA            | 17059 |
| gb:LC522974 | Organism: Severe | TCAATATCTCAGATGAGTTTTCTAGCAATGTTGCAAATTATCAAAGGTTGGTATGCAA            | 17059 |
| gb:MN985325 | Organism: Severe | TCAATATCTCAGATGAGTTTTCTAGCAATGTTGCAAATTATCAAAGGTTGGTATGCAA            | 17062 |
| gb:MT020881 | Organism: Severe | TCAATATCTCAGATGAGTTTTCTAGCAATGTTGCAAATTATCAAAGGTTGGTATGCAA            | 17062 |
| gb:MT020880 | Organism: Severe | TCAATATCTCAGATGAGTTTTCTAGCAATGTTGCAAATTATCAAAGGTTGGTATGCAA            | 17062 |
| gb:MT066175 | Organism: Severe | TCAATATCTCAGATGAGTTTTCTAGCAATGTTGCAAATTATCAAAGGTTGGTATGCAA            | 17062 |
| gb:MN997409 | Organism: Severe | TCAATATCTCAGATGAGTTTTCTAGCAATGTTGCAAATTATCAAAGGTTGGTATGCAA            | 17062 |
| gb:MN938384 | Organism: Severe | TCAATATCTCAGATGAGTTTTCTAGCAATGTTGCAAATTATCAAAGGTTGGTATGCAA            | 17030 |
| gb:MT044258 | Organism: Severe | TCAATATCTCAGATGAGTTTTCTAGCAATGTTGCAAATTATCAAAGGTTGGTATGCAA            | 17038 |
| gb:MT039890 | Organism: Severe | TCAATATCTCAGATGAGTTTTCTAGCAATGTTGCAAATTATCAAAGGTTGGTATGCAA            | 17062 |
| gb:MN988713 | Organism: Severe | TCAATATCTCAGATGAGTTTTCTAGCAATGTTGCAAATTATCAAAGGTTGGTATGCAA            | 17062 |
| gb:LC521925 | Organism: Severe | TCAATATCTCAGATGAGTTTTCTAGCAATGTTGCAAATTATCAAAGGTTGGTATGCAA            | 17035 |
| gb:MT093571 | Organism: Severe | TCAATATCTCAGATGAGTTTTCTAGCAATGTTGCAAATTATCAAAGGTTGGTATGCAA            | 17062 |
| gb:MT039887 | Organism: Severe | TCAATATCTCAGATGAGTTTTCTAGCAATGTTGCAAATTATCAAAGGTTGGTATGCAA            | 17062 |
| gb:MT019530 | Organism: Severe | TCAATATCTCAGATGAGTTTTCTAGCAATGTTGCAAATTATCAAAGGTTGGTATGCAA            | 17062 |
| gb:MT039888 | Organism: Severe | TCAATATCTCAGATGAGTTTTCTAGCAATGTTGCAAATTATCAAAGGTTGGTATGCAA            | 17062 |
| gb:LC522972 | Organism: Severe | TCAATATCTCAGATGAGTTTTCTAGCAATGTTGCAAATTATCAAAGGTTGGTATGCAA            | 17059 |
| gb:MT027063 | Organism: Severe | TCAATATCTCAGATGAGTTTTCTAGCAATGTTGCAAATTATCAAAGGTTGGTATGCAA            | 17062 |
| gb:MT027062 | Organism: Severe | TCAATATCTCAGATGAGTTTTCTAGCAATGTTGCAAATTATCAAAGGTTGGTATGCAA            | 17062 |
| gb:MT019529 | Organism: Severe | TCAATATCTCAGATGAGTTTTCTAGCAATGTTGCAAATTATCAAAGGTTGGTATGCAA            | 17062 |
| gb:MN996529 | Organism: Severe | TCAATATCTCAGATGAGTTTTCTAGCAATGTTGCAAATTATCAAAGGTTGGTATGCAA            | 17050 |
| gb:MN996531 | Organism: Severe | TCAATATCTCAGATGAGTTTTCTAGCAATGTTGCAAATTATCAAAGGTTGGTATGCAA            | 17049 |
| gb:MT066176 | Organism: Severe | TCAATATCTCAGATGAGTTTTCTAGCAATGTTGCAAATTATCAAAGGTTGGTATGCAA            | 17062 |
| gb:MT027064 | Organism: Severe | TCAATATCTCAGATGAGTTTTCTAGCAATGTTGCAAATTATCAAAGGTTGGTATGCAA            | 17062 |
| gb:MN994468 | Organism: Severe | TCAATATCTCAGATGAGTTTTCTAGCAATGTTGCAAATTATCAAAGGTTGGTATGCAA            | 17062 |
| gb:MT072688 | Organism: Severe | TCAATATCTCAGATGAGTTTTCTAGCAATGTTGCAAATTATCAAAGGTTGGTATGCAA            | 17047 |
| gb:MN996527 | Organism: Severe | TCAATATCTCAGATGAGTTTTCTAGCAATGTTGCAAATTATCAAAGGTTGGTATGCAA            | 17029 |
| gb:MT093631 | Organism: Severe | TCAATATCTCAGATGAGTTTTCTAGCAATGTTGCAAATTATCAAAGGTTGGTATGCAA            | 17100 |
| gb:MT106053 | Organism: Severe | TCAATATCTCAGATGAGTTTTCTAGCAATGTTGCAAATTATCAAAGGTTGGTATGCAA            | 17062 |
| gb:MT019533 | Organism: Severe | TCAATATCTCAGATGAGTTTTCTAGCAATGTTGCAAATTATCAAAGGTTGGTATGCAA            | 17062 |
| gb:MT019531 | Organism: Severe | TCAATATCTCAGATGAGTTTTCTAGCAATGTTGCAAATTATCAAAGGTTGGTATGCAA            | 17062 |
| gb:MN996528 | Organism: Severe | TCAATATCTCAGATGAGTTTTCTAGCAATGTTGCAAATTATCAAAGGTTGGTATGCAA            | 17062 |
| gb:MN996530 | Organism: Severe | TCAATATCTCAGATGAGTTTTCTAGCAATGTTGCAAATTATCAAAGGTTGGTATGCAA            | 17048 |
| gb:MN908947 | Organism: Severe | TCAATATCTCAGATGAGTTTTCTAGCAATGTTGCAAATTATCAAAGGTTGGTATGCAA            | 17062 |
| gb:MT019532 | Organism: Severe | TCAATATCTCAGATGAGTTTTCTAGCAATGTTGCAAATTATCAAAGGTTGGTATGCAA<br>*****   | 17062 |

|             |                  |                                                               |       |
|-------------|------------------|---------------------------------------------------------------|-------|
| gb:MT020781 | Organism: Severe | AGTATTCTACACTCCAGGGACCACCTGGTACTGGTAAAGAGTCATTTTGCTATTGGCCTAG | 17110 |
| gb:MT007544 | Organism: Severe | AGTATTCTACACTCCAGGGACCACCTGGTACTGGTAAAGAGTCATTTTGCTATTGGCCTAG | 17122 |
| gb:MN994467 | Organism: Severe | AGTATTCTACACTCCAGGGACCACCTGGTACTGGTAAAGAGTCATTTTGCTATTGGCCTAG | 17122 |
| gb:MT044257 | Organism: Severe | AGTATTCTACACTCCAGGGACCACCTGGTACTGGTAAAGAGTCATTTTGCTATTGGCCTAG | 17122 |
| gb:MT106054 | Organism: Severe | AGTATTCTACACTCCAGGGACCACCTGGTACTGGTAAAGAGTCATTTTGCTATTGGCCTAG | 17122 |
| gb:MT049951 | Organism: Severe | AGTATTCTACACTCCAGGGACCACCTGGTACTGGTAAAGAGTCATTTTGCTATTGGCCTAG | 17122 |
| gb:MN975262 | Organism: Severe | AGTATTCTACACTCCAGGGACCACCTGGTACTGGTAAAGAGTCATTTTGCTATTGGCCTAG | 17122 |
| gb:MT106052 | Organism: Severe | AGTATTCTACACTCCAGGGACCACCTGGTACTGGTAAAGAGTCATTTTGCTATTGGCCTAG | 17122 |
| gb:LC522975 | Organism: Severe | AGTATTCTACACTCCAGGGACCACCTGGTACTGGTAAAGAGTCATTTTGCTATTGGCCTAG | 17119 |
| gb:LC522973 | Organism: Severe | AGTATTCTACACTCCAGGGACCACCTGGTACTGGTAAAGAGTCATTTTGCTATTGGCCTAG | 17119 |
| gb:LC522974 | Organism: Severe | AGTATTCTACACTCCAGGGACCACCTGGTACTGGTAAAGAGTCATTTTGCTATTGGCCTAG | 17119 |
| gb:MN985325 | Organism: Severe | AGTATTCTACACTCCAGGGACCACCTGGTACTGGTAAAGAGTCATTTTGCTATTGGCCTAG | 17122 |
| gb:MT020881 | Organism: Severe | AGTATTCTACACTCCAGGGACCACCTGGTACTGGTAAAGAGTCATTTTGCTATTGGCCTAG | 17122 |
| gb:MT020880 | Organism: Severe | AGTATTCTACACTCCAGGGACCACCTGGTACTGGTAAAGAGTCATTTTGCTATTGGCCTAG | 17122 |
| gb:MT066175 | Organism: Severe | AGTATTCTACACTCCAGGGACCACCTGGTACTGGTAAAGAGTCATTTTGCTATTGGCCTAG | 17122 |
| gb:MN997409 | Organism: Severe | AGTATTCTACACTCCAGGGACCACCTGGTACTGGTAAAGAGTCATTTTGCTATTGGCCTAG | 17122 |



|             |                 |                                                              |       |
|-------------|-----------------|--------------------------------------------------------------|-------|
| gb:MN996527 | Organism:Severe | CTCTCTACTACCCTTCTGCTCGCATAGTGTATACAGCTTGCTCTCATGCCGCTGTTGATG | 17149 |
| gb:MT093631 | Organism:Severe | CTCTCTACTACCCTTCTGCTCGCATAGTGTATACAGCTTGCTCTCATGCCGCTGTTGATG | 17220 |
| gb:MT106053 | Organism:Severe | CTCTCTACTACCCTTCTGCTCGCATAGTGTATACAGCTTGCTCTCATGCCGCTGTTGATG | 17182 |
| gb:MT019533 | Organism:Severe | CTCTCTACTACCCTTCTGCTCGCATAGTGTATACAGCTTGCTCTCATGCCGCTGTTGATG | 17182 |
| gb:MT019531 | Organism:Severe | CTCTCTACTACCCTTCTGCTCGCATAGTGTATACAGCTTGCTCTCATGCCGCTGTTGATG | 17182 |
| gb:MN996528 | Organism:Severe | CTCTCTACTACCCTTCTGCTCGCATAGTGTATACAGCTTGCTCTCATGCCGCTGTTGATG | 17182 |
| gb:MN996530 | Organism:Severe | CTCTCTACTACCCTTCTGCTCGCATAGTGTATACAGCTTGCTCTCATGCCGCTGTTGATG | 17168 |
| gb:MN908947 | Organism:Severe | CTCTCTACTACCCTTCTGCTCGCATAGTGTATACAGCTTGCTCTCATGCCGCTGTTGATG | 17182 |
| gb:MT019532 | Organism:Severe | CTCTCTACTACCCTTCTGCTCGCATAGTGTATACAGCTTGCTCTCATGCCGCTGTTGATG | 17182 |

\*\*\*\*\*

|             |                 |                                                             |       |
|-------------|-----------------|-------------------------------------------------------------|-------|
| gb:MT020781 | Organism:Severe | CACTATGTGAGAAGGCATTAATAATTTGCCTATAGATAAATGTAGTAGAATTATACCTG | 17230 |
| gb:MT007544 | Organism:Severe | CACTATGTGAGAAGGCATTAATAATTTGCCTATAGATAAATGTAGTAGAATTATACCTG | 17242 |
| gb:MN994467 | Organism:Severe | CACTATGTGAGAAGGCATTAATAATTTGCCTATAGATAAATGTAGTAGAATTATACCTG | 17242 |
| gb:MT044257 | Organism:Severe | CACTATGTGAGAAGGCATTAATAATTTGCCTATAGATAAATGTAGTAGAATTATACCTG | 17242 |
| gb:MT106054 | Organism:Severe | CACTATGTGAGAAGGCATTAATAATTTGCCTATAGATAAATGTAGTAGAATTATACCTG | 17242 |
| gb:MT049951 | Organism:Severe | CACTATGTGAGAAGGCATTAATAATTTGCCTATAGATAAATGTAGTAGAATTATACCTG | 17242 |
| gb:MN975262 | Organism:Severe | CACTATGTGAGAAGGCATTAATAATTTGCCTATAGATAAATGTAGTAGAATTATACCTG | 17242 |
| gb:MT106052 | Organism:Severe | CACTATGTGAGAAGGCATTAATAATTTGCCTATAGATAAATGTAGTAGAATTATACCTG | 17242 |
| gb:LC522975 | Organism:Severe | CACTATGTGAGAAGGCATTAATAATTTGCCTATAGATAAATGTAGTAGAATTATACCTG | 17239 |
| gb:LC522973 | Organism:Severe | CACTATGTGAGAAGGCATTAATAATTTGCCTATAGATAAATGTAGTAGAATTATACCTG | 17239 |
| gb:LC522974 | Organism:Severe | CACTATGTGAGAAGGCATTAATAATTTGCCTATAGATAAATGTAGTAGAATTATACCTG | 17239 |
| gb:MN985325 | Organism:Severe | CACTATGTGAGAAGGCATTAATAATTTGCCTATAGATAAATGTAGTAGAATTATACCTG | 17242 |
| gb:MT020881 | Organism:Severe | CACTATGTGAGAAGGCATTAATAATTTGCCTATAGATAAATGTAGTAGAATTATACCTG | 17242 |
| gb:MT020880 | Organism:Severe | CACTATGTGAGAAGGCATTAATAATTTGCCTATAGATAAATGTAGTAGAATTATACCTG | 17242 |
| gb:MT066175 | Organism:Severe | CACTATGTGAGAAGGCATTAATAATTTGCCTATAGATAAATGTAGTAGAATTATACCTG | 17242 |
| gb:MN997409 | Organism:Severe | CACTATGTGAGAAGGCATTAATAATTTGCCTATAGATAAATGTAGTAGAATTATACCTG | 17242 |
| gb:MN938384 | Organism:Severe | CACTATGTGAGAAGGCATTAATAATTTGCCTATAGATAAATGTAGTAGAATTATACCTG | 17210 |
| gb:MT044258 | Organism:Severe | CACTATGTGAGAAGGCATTAATAATTTGCCTATAGATAAATGTAGTAGAATTATACCTG | 17218 |
| gb:MT039890 | Organism:Severe | CACTATGTGAGAAGGCATTAATAATTTGCCTATAGATAAATGTAGTAGAATTATACCTG | 17242 |
| gb:MN988713 | Organism:Severe | CACTATGTGAGAAGGCATTAATAATTTGCCTATAGATAAATGTAGTAGAATTATACCTG | 17242 |
| gb:LC521925 | Organism:Severe | CACTATGTGAGAAGGCATTAATAATTTGCCTATAGATAAATGTAGTAGAATTATACCTG | 17215 |
| gb:MT093571 | Organism:Severe | CACTATGTGAGAAGGCATTAATAATTTGCCTATAGATAAATGTAGTAGAATTATACCTG | 17242 |
| gb:MT039887 | Organism:Severe | CACTATGTGAGAAGGCATTAATAATTTGCCTATAGATAAATGTAGTAGAATTATACCTG | 17242 |
| gb:MT019530 | Organism:Severe | CACTATGTGAGAAGGCATTAATAATTTGCCTATAGATAAATGTAGTAGAATTATACCTG | 17242 |
| gb:MT039888 | Organism:Severe | CACTATGTGAGAAGGCATTAATAATTTGCCTATAGATAAATGTAGTAGAATTATACCTG | 17242 |
| gb:LC522972 | Organism:Severe | CACTATGTGAGAAGGCATTAATAATTTGCCTATAGATAAATGTAGTAGAATTATACCTG | 17239 |
| gb:MT027063 | Organism:Severe | CACTATGTGAGAAGGCATTAATAATTTGCCTATAGATAAATGTAGTAGAATTATACCTG | 17242 |
| gb:MT027062 | Organism:Severe | CACTATGTGAGAAGGCATTAATAATTTGCCTATAGATAAATGTAGTAGAATTATACCTG | 17242 |
| gb:MT019529 | Organism:Severe | CACTATGTGAGAAGGCATTAATAATTTGCCTATAGATAAATGTAGTAGAATTATACCTG | 17242 |
| gb:MN996529 | Organism:Severe | CACTATGTGAGAAGGCATTAATAATTTGCCTATAGATAAATGTAGTAGAATTATACCTG | 17230 |
| gb:MN996531 | Organism:Severe | CACTATGTGAGAAGGCATTAATAATTTGCCTATAGATAAATGTAGTAGAATTATACCTG | 17229 |
| gb:MT066176 | Organism:Severe | CACTATGTGAGAAGGCATTAATAATTTGCCTATAGATAAATGTAGTAGAATTATACCTG | 17242 |
| gb:MT027064 | Organism:Severe | CACTATGTGAGAAGGCATTAATAATTTGCCTATAGATAAATGTAGTAGAATTATACCTG | 17242 |
| gb:MN994468 | Organism:Severe | CACTATGTGAGAAGGCATTAATAATTTGCCTATAGATAAATGTAGTAGAATTATACCTG | 17242 |
| gb:MT072688 | Organism:Severe | CACTATGTGAGAAGGCATTAATAATTTGCCTATAGATAAATGTAGTAGAATTATACCTG | 17227 |
| gb:MN996527 | Organism:Severe | CACTATGTGAGAAGGCATTAATAATTTGCCTATAGATAAATGTAGTAGAATTATACCTG | 17209 |
| gb:MT093631 | Organism:Severe | CACTATGTGAGAAGGCATTAATAATTTGCCTATAGATAAATGTAGTAGAATTATACCTG | 17280 |
| gb:MT106053 | Organism:Severe | CACTATGTGAGAAGGCATTAATAATTTGCCTATAGATAAATGTAGTAGAATTATACCTG | 17242 |
| gb:MT019533 | Organism:Severe | CACTATGTGAGAAGGCATTAATAATTTGCCTATAGATAAATGTAGTAGAATTATACCTG | 17242 |
| gb:MT019531 | Organism:Severe | CACTATGTGAGAAGGCATTAATAATTTGCCTATAGATAAATGTAGTAGAATTATACCTG | 17242 |
| gb:MN996528 | Organism:Severe | CACTATGTGAGAAGGCATTAATAATTTGCCTATAGATAAATGTAGTAGAATTATACCTG | 17242 |
| gb:MN996530 | Organism:Severe | CACTATGTGAGAAGGCATTAATAATTTGCCTATAGATAAATGTAGTAGAATTATACCTG | 17228 |
| gb:MN908947 | Organism:Severe | CACTATGTGAGAAGGCATTAATAATTTGCCTATAGATAAATGTAGTAGAATTATACCTG | 17242 |
| gb:MT019532 | Organism:Severe | CACTATGTGAGAAGGCATTAATAATTTGCCTATAGATAAATGTAGTAGAATTATACCTG | 17242 |

\*\*\*\*\*

|             |                 |                                                              |       |
|-------------|-----------------|--------------------------------------------------------------|-------|
| gb:MT020781 | Organism:Severe | CACGTGCTCGTGTAGAGTGTGTTTGTAAATTCAAAGTGAATTCAACATTAGAACAGTATG | 17290 |
| gb:MT007544 | Organism:Severe | CACGTGCTCGTGTAGAGTGTGTTTGTAAATTCAAAGTGAATTCAACATTAGAACAGTATG | 17302 |
| gb:MN994467 | Organism:Severe | CACGTGCTCGTGTAGAGTGTGTTTGTAAATTCAAAGTGAATTCAACATTAGAACAGTATG | 17302 |
| gb:MT044257 | Organism:Severe | CACGTGCTCGTGTAGAGTGTGTTTGTAAATTCAAAGTGAATTCAACATTAGAACAGTATG | 17302 |
| gb:MT106054 | Organism:Severe | CACGTGCTCGTGTAGAGTGTGTTTGTAAATTCAAAGTGAATTCAACATTAGAACAGTATG | 17302 |
| gb:MT049951 | Organism:Severe | CACGTGCTCGTGTAGAGTGTGTTTGTAAATTCAAAGTGAATTCAACATTAGAACAGTATG | 17302 |
| gb:MN975262 | Organism:Severe | CACGTGCTCGTGTAGAGTGTGTTTGTAAATTCAAAGTGAATTCAACATTAGAACAGTATG | 17302 |
| gb:MT106052 | Organism:Severe | CACGTGCTCGTGTAGAGTGTGTTTGTAAATTCAAAGTGAATTCAACATTAGAACAGTATG | 17302 |

|             |                 |                                                               |       |
|-------------|-----------------|---------------------------------------------------------------|-------|
| gb:LC522975 | Organism:Severe | CACGTGCTCGGTAGAGTGT TTTGATAAATTC AAAGTGAATTCAACATTAGAACAGTATG | 17299 |
| gb:LC522973 | Organism:Severe | CACGTGCTCGGTAGAGTGT TTTGATAAATTC AAAGTGAATTCAACATTAGAACAGTATG | 17299 |
| gb:LC522974 | Organism:Severe | CACGTGCTCGGTAGAGTGT TTTGATAAATTC AAAGTGAATTCAACATTAGAACAGTATG | 17299 |
| gb:MN985325 | Organism:Severe | CACGTGCTCGGTAGAGTGT TTTGATAAATTC AAAGTGAATTCAACATTAGAACAGTATG | 17302 |
| gb:MT020881 | Organism:Severe | CACGTGCTCGGTAGAGTGT TTTGATAAATTC AAAGTGAATTCAACATTAGAACAGTATG | 17302 |
| gb:MT020880 | Organism:Severe | CACGTGCTCGGTAGAGTGT TTTGATAAATTC AAAGTGAATTCAACATTAGAACAGTATG | 17302 |
| gb:MT066175 | Organism:Severe | CACGTGCTCGGTAGAGTGT TTTGATAAATTC AAAGTGAATTCAACATTAGAACAGTATG | 17302 |
| gb:MN997409 | Organism:Severe | CACGTGCTCGGTAGAGTGT TTTGATAAATTC AAAGTGAATTCAACATTAGAACAGTATG | 17302 |
| gb:MN938384 | Organism:Severe | CACGTGCTCGGTAGAGTGT TTTGATAAATTC AAAGTGAATTCAACATTAGAACAGTATG | 17270 |
| gb:MT044258 | Organism:Severe | CACGTGCTCGGTAGAGTGT TTTGATAAATTC AAAGTGAATTCAACATTAGAACAGTATG | 17278 |
| gb:MT039890 | Organism:Severe | CACGTGCTCGGTAGAGTGT TTTGATAAATTC AAAGTGAATTCAACATTAGAACAGTATG | 17302 |
| gb:MN988713 | Organism:Severe | CACGTGCTCGGTAGAGTGT TTTGATAAATTC AAAGTGAATTCAACATTAGAACAGTATG | 17302 |
| gb:LC521925 | Organism:Severe | CACGTGCTCGGTAGAGTGT TTTGATAAATTC AAAGTGAATTCAACATTAGAACAGTATG | 17275 |
| gb:MT093571 | Organism:Severe | CACGTGCTCGGTAGAGTGT TTTGATAAATTC AAAGTGAATTCAACATTAGAACAGTATG | 17302 |
| gb:MT039887 | Organism:Severe | CACGTGCTCGGTAGAGTGT TTTGATAAATTC AAAGTGAATTCAACATTAGAACAGTATG | 17302 |
| gb:MT019530 | Organism:Severe | CACGTGCTCGGTAGAGTGT TTTGATAAATTC AAAGTGAATTCAACATTAGAACAGTATG | 17302 |
| gb:MT039888 | Organism:Severe | CACGTGCTCGGTAGAGTGT TTTGATAAATTC AAAGTGAATTCAACATTAGAACAGTATG | 17302 |
| gb:LC522972 | Organism:Severe | CACGTGCTCGGTAGAGTGT TTTGATAAATTC AAAGTGAATTCAACATTAGAACAGTATG | 17299 |
| gb:MT027063 | Organism:Severe | CACGTGCTCGGTAGAGTGT TTTGATAAATTC AAAGTGAATTCAACATTAGAACAGTATG | 17302 |
| gb:MT027062 | Organism:Severe | CACGTGCTCGGTAGAGTGT TTTGATAAATTC AAAGTGAATTCAACATTAGAACAGTATG | 17302 |
| gb:MT019529 | Organism:Severe | CACGTGCTCGGTAGAGTGT TTTGATAAATTC AAAGTGAATTCAACATTAGAACAGTATG | 17302 |
| gb:MN996529 | Organism:Severe | CACGTGCTCGGTAGAGTGT TTTGATAAATTC AAAGTGAATTCAACATTAGAACAGTATG | 17290 |
| gb:MN996531 | Organism:Severe | CACGTGCTCGGTAGAGTGT TTTGATAAATTC AAAGTGAATTCAACATTAGAACAGTATG | 17289 |
| gb:MT066176 | Organism:Severe | CACGTGCTCGGTAGAGTGT TTTGATAAATTC AAAGTGAATTCAACATTAGAACAGTATG | 17302 |
| gb:MT027064 | Organism:Severe | CACGTGCTCGGTAGAGTGT TTTGATAAATTC AAAGTGAATTCAACATTAGAACAGTATG | 17302 |
| gb:MN994468 | Organism:Severe | CACGTGCTCGGTAGAGTGT TTTGATAAATTC AAAGTGAATTCAACATTAGAACAGTATG | 17302 |
| gb:MT072688 | Organism:Severe | CACGTGCTCGGTAGAGTGT TTTGATAAATTC AAAGTGAATTCAACATTAGAACAGTATG | 17287 |
| gb:MN996527 | Organism:Severe | CACGTGCTCGGTAGAGTGT TTTGATAAATTC AAAGTGAATTCAACATTAGAACAGTATG | 17269 |
| gb:MT093631 | Organism:Severe | CACGTGCTCGGTAGAGTGT TTTGATAAATTC AAAGTGAATTCAACATTAGAACAGTATG | 17340 |
| gb:MT106053 | Organism:Severe | CACGTGCTCGGTAGAGTGT TTTGATAAATTC AAAGTGAATTCAACATTAGAACAGTATG | 17302 |
| gb:MT019533 | Organism:Severe | CACGTGCTCGGTAGAGTGT TTTGATAAATTC AAAGTGAATTCAACATTAGAACAGTATG | 17302 |
| gb:MT019531 | Organism:Severe | CACGTGCTCGGTAGAGTGT TTTGATAAATTC AAAGTGAATTCAACATTAGAACAGTATG | 17302 |
| gb:MN996528 | Organism:Severe | CACGTGCTCGGTAGAGTGT TTTGATAAATTC AAAGTGAATTCAACATTAGAACAGTATG | 17302 |
| gb:MN996530 | Organism:Severe | CACGTGCTCGGTAGAGTGT TTTGATAAATTC AAAGTGAATTCAACATTAGAACAGTATG | 17288 |
| gb:MN908947 | Organism:Severe | CACGTGCTCGGTAGAGTGT TTTGATAAATTC AAAGTGAATTCAACATTAGAACAGTATG | 17302 |
| gb:MT019532 | Organism:Severe | CACGTGCTCGGTAGAGTGT TTTGATAAATTC AAAGTGAATTCAACATTAGAACAGTATG | 17302 |

\*\*\*\*\*

|             |                 |                                                             |       |
|-------------|-----------------|-------------------------------------------------------------|-------|
| gb:MT020781 | Organism:Severe | TCTTTTGTACTGTAATGCATTGCCTGAGACGACAGCAGATATAGTTGTCTTTGATGAAA | 17350 |
| gb:MT007544 | Organism:Severe | TCTTTTGTACTGTAATGCATTGCCTGAGACGACAGCAGATATAGTTGTCTTTGATGAAA | 17362 |
| gb:MN994467 | Organism:Severe | TCTTTTGTACTGTAATGCATTGCCTGAGACGACAGCAGATATAGTTGTCTTTGATGAAA | 17362 |
| gb:MT044257 | Organism:Severe | TCTTTTGTACTGTAATGCATTGCCTGAGACGACAGCAGATATAGTTGTCTTTGATGAAA | 17362 |
| gb:MT106054 | Organism:Severe | TCTTTTGTACTGTAATGCATTGCCTGAGACGACAGCAGATATAGTTGTCTTTGATGAAA | 17362 |
| gb:MT049951 | Organism:Severe | TCTTTTGTACTGTAATGCATTGCCTGAGACGACAGCAGATATAGTTGTCTTTGATGAAA | 17362 |
| gb:MN975262 | Organism:Severe | TCTTTTGTACTGTAATGCATTGCCTGAGACGACAGCAGATATAGTTGTCTTTGATGAAA | 17362 |
| gb:MT106052 | Organism:Severe | TCTTTTGTACTGTAATGCATTGCCTGAGACGACAGCAGATATAGTTGTCTTTGATGAAA | 17362 |
| gb:LC522975 | Organism:Severe | TCTTTTGTACTGTAATGCATTGCCTGAGACGACAGCAGATATAGTTGTCTTTGATGAAA | 17359 |
| gb:LC522973 | Organism:Severe | TCTTTTGTACTGTAATGCATTGCCTGAGACGACAGCAGATATAGTTGTCTTTGATGAAA | 17359 |
| gb:LC522974 | Organism:Severe | TCTTTTGTACTGTAATGCATTGCCTGAGACGACAGCAGATATAGTTGTCTTTGATGAAA | 17359 |
| gb:MN985325 | Organism:Severe | TCTTTTGTACTGTAATGCATTGCCTGAGACGACAGCAGATATAGTTGTCTTTGATGAAA | 17362 |
| gb:MT020881 | Organism:Severe | TCTTTTGTACTGTAATGCATTGCCTGAGACGACAGCAGATATAGTTGTCTTTGATGAAA | 17362 |
| gb:MT020880 | Organism:Severe | TCTTTTGTACTGTAATGCATTGCCTGAGACGACAGCAGATATAGTTGTCTTTGATGAAA | 17362 |
| gb:MT066175 | Organism:Severe | TCTTTTGTACTGTAATGCATTGCCTGAGACGACAGCAGATATAGTTGTCTTTGATGAAA | 17362 |
| gb:MN997409 | Organism:Severe | TCTTTTGTACTGTAATGCATTGCCTGAGACGACAGCAGATATAGTTGTCTTTGATGAAA | 17362 |
| gb:MN938384 | Organism:Severe | TCTTTTGTACTGTAATGCATTGCCTGAGACGACAGCAGATATAGTTGTCTTTGATGAAA | 17330 |
| gb:MT044258 | Organism:Severe | TCTTTTGTACTGTAATGCATTGCCTGAGACGACAGCAGATATAGTTGTCTTTGATGAAA | 17338 |
| gb:MT039890 | Organism:Severe | TCTTTTGTACTGTAATGCATTGCCTGAGACGACAGCAGATATAGTTGTCTTTGATGAAA | 17362 |
| gb:MN988713 | Organism:Severe | TCTTTTGTACTGTAATGCATTGCCTGAGACGACAGCAGATATAGTTGTCTTTGATGAAA | 17362 |
| gb:LC521925 | Organism:Severe | TCTTTTGTACTGTAATGCATTGCCTGAGACGACAGCAGATATAGTTGTCTTTGATGAAA | 17335 |
| gb:MT093571 | Organism:Severe | TCTTTTGTACTGTAATGCATTGCCTGAGACGACAGCAGATATAGTTGTCTTTGATGAAA | 17362 |
| gb:MT039887 | Organism:Severe | TCTTTTGTACTGTAATGCATTGCCTGAGACGACAGCAGATATAGTTGTCTTTGATGAAA | 17362 |
| gb:MT019530 | Organism:Severe | TCTTTTGTACTGTAATGCATTGCCTGAGACGACAGCAGATATAGTTGTCTTTGATGAAA | 17362 |
| gb:MT039888 | Organism:Severe | TCTTTTGTACTGTAATGCATTGCCTGAGACGACAGCAGATATAGTTGTCTTTGATGAAA | 17362 |
| gb:LC522972 | Organism:Severe | TCTTTTGTACTGTAATGCATTGCCTGAGACGACAGCAGATATAGTTGTCTTTGATGAAA | 17359 |
| gb:MT027063 | Organism:Severe | TCTTTTGTACTGTAATGCATTGCCTGAGACGACAGCAGATATAGTTGTCTTTGATGAAA | 17362 |

|             |                 |                                                               |       |
|-------------|-----------------|---------------------------------------------------------------|-------|
| gb:MT027062 | Organism:Severe | TCTTTTGTACTGTAAATGCATTGCCGTGAGACGACAGCAGATATAGTTGTCTTTGATGAAA | 17362 |
| gb:MT019529 | Organism:Severe | TCTTTTGTACTGTAAATGCATTGCCGTGAGACGACAGCAGATATAGTTGTCTTTGATGAAA | 17362 |
| gb:MN996529 | Organism:Severe | TCTTTTGTACTGTAAATGCATTGCCGTGAGACGACAGCAGATATAGTTGTCTTTGATGAAA | 17350 |
| gb:MN996531 | Organism:Severe | TCTTTTGTACTGTAAATGCATTGCCGTGAGACGACAGCAGATATAGTTGTCTTTGATGAAA | 17349 |
| gb:MT066176 | Organism:Severe | TCTTTTGTACTGTAAATGCATTGCCGTGAGACGACAGCAGATATAGTTGTCTTTGATGAAA | 17362 |
| gb:MT027064 | Organism:Severe | TCTTTTGTACTGTAAATGCATTGCCGTGAGACGACAGCAGATATAGTTGTCTTTGATGAAA | 17362 |
| gb:MN994468 | Organism:Severe | TCTTTTGTACTGTAAATGCATTGCCGTGAGACGACAGCAGATATAGTTGTCTTTGATGAAA | 17362 |
| gb:MT072688 | Organism:Severe | TCTTTTGTACTGTAAATGCATTGCCGTGAGACGACAGCAGATATAGTTGTCTTTGATGAAA | 17347 |
| gb:MN996527 | Organism:Severe | TCTTTTGTACTGTAAATGCATTGCCGTGAGACGACAGCAGATATAGTTGTCTTTGATGAAA | 17329 |
| gb:MT093631 | Organism:Severe | TCTTTTGTACTGTAAATGCATTGCCGTGAGACGACAGCAGATATAGTTGTCTTTGATGAAA | 17400 |
| gb:MT106053 | Organism:Severe | TCTTTTGTACTGTAAATGCATTGCCGTGAGACGACAGCAGATATAGTTGTCTTTGATGAAA | 17362 |
| gb:MT019533 | Organism:Severe | TCTTTTGTACTGTAAATGCATTGCCGTGAGACGACAGCAGATATAGTTGTCTTTGATGAAA | 17362 |
| gb:MT019531 | Organism:Severe | TCTTTTGTACTGTAAATGCATTGCCGTGAGACGACAGCAGATATAGTTGTCTTTGATGAAA | 17362 |
| gb:MN996528 | Organism:Severe | TCTTTTGTACTGTAAATGCATTGCCGTGAGACGACAGCAGATATAGTTGTCTTTGATGAAA | 17362 |
| gb:MN996530 | Organism:Severe | TCTTTTGTACTGTAAATGCATTGCCGTGAGACGACAGCAGATATAGTTGTCTTTGATGAAA | 17348 |
| gb:MN908947 | Organism:Severe | TCTTTTGTACTGTAAATGCATTGCCGTGAGACGACAGCAGATATAGTTGTCTTTGATGAAA | 17362 |
| gb:MT019532 | Organism:Severe | TCTTTTGTACTGTAAATGCATTGCCGTGAGACGACAGCAGATATAGTTGTCTTTGATGAAA | 17362 |

\*\*\*\*\*

|             |                 |                                                              |       |
|-------------|-----------------|--------------------------------------------------------------|-------|
| gb:MT020781 | Organism:Severe | TTTCAATGGCCACAAATTATGATTTGAGTGTTGTCAATGCCAGATTACGTGCTAAGCACT | 17410 |
| gb:MT007544 | Organism:Severe | TTTCAATGGCCACAAATTATGATTTGAGTGTTGTCAATGCCAGATTACGTGCTAAGCACT | 17422 |
| gb:MN994467 | Organism:Severe | TTTCAATGGCCACAAATTATGATTTGAGTGTTGTCAATGCCAGATTACGTGCTAAGCACT | 17422 |
| gb:MT044257 | Organism:Severe | TTTCAATGGCCACAAATTATGATTTGAGTGTTGTCAATGCCAGATTACGTGCTAAGCACT | 17422 |
| gb:MT106054 | Organism:Severe | TTTCAATGGCCACAAATTATGATTTGAGTGTTGTCAATGCCAGATTACGTGCTAAGCACT | 17422 |
| gb:MT049951 | Organism:Severe | TTTCAATGGCCACAAATTATGATTTGAGTGTTGTCAATGCCAGATTACGTGCTAAGCACT | 17422 |
| gb:MN975262 | Organism:Severe | TTTCAATGGCCACAAATTATGATTTGAGTGTTGTCAATGCCAGATTACGTGCTAAGCACT | 17422 |
| gb:MT106052 | Organism:Severe | TTTCAATGGCCACAAATTATGATTTGAGTGTTGTCAATGCCAGATTACGTGCTAAGCACT | 17422 |
| gb:LC522975 | Organism:Severe | TTTCAATGGCCACAAATTATGATTTGAGTGTTGTCAATGCCAGATTACGTGCTAAGCACT | 17419 |
| gb:LC522973 | Organism:Severe | TTTCAATGGCCACAAATTATGATTTGAGTGTTGTCAATGCCAGATTACGTGCTAAGCACT | 17419 |
| gb:LC522974 | Organism:Severe | TTTCAATGGCCACAAATTATGATTTGAGTGTTGTCAATGCCAGATTACGTGCTAAGCACT | 17419 |
| gb:MN985325 | Organism:Severe | TTTCAATGGCCACAAATTATGATTTGAGTGTTGTCAATGCCAGATTACGTGCTAAGCACT | 17422 |
| gb:MT020881 | Organism:Severe | TTTCAATGGCCACAAATTATGATTTGAGTGTTGTCAATGCCAGATTACGTGCTAAGCACT | 17422 |
| gb:MT020880 | Organism:Severe | TTTCAATGGCCACAAATTATGATTTGAGTGTTGTCAATGCCAGATTACGTGCTAAGCACT | 17422 |
| gb:MT066175 | Organism:Severe | TTTCAATGGCCACAAATTATGATTTGAGTGTTGTCAATGCCAGATTACGTGCTAAGCACT | 17422 |
| gb:MN997409 | Organism:Severe | TTTCAATGGCCACAAATTATGATTTGAGTGTTGTCAATGCCAGATTACGTGCTAAGCACT | 17422 |
| gb:MN938384 | Organism:Severe | TTTCAATGGCCACAAATTATGATTTGAGTGTTGTCAATGCCAGATTACGTGCTAAGCACT | 17390 |
| gb:MT044258 | Organism:Severe | TTTCAATGGCCACAAATTATGATTTGAGTGTTGTCAATGCCAGATTACGTGCTAAGCACT | 17398 |
| gb:MT039890 | Organism:Severe | TTTCAATGGCCACAAATTATGATTTGAGTGTTGTCAATGCCAGATTACGTGCTAAGCACT | 17422 |
| gb:MN988713 | Organism:Severe | TTTCAATGGCCACAAATTATGATTTGAGTGTTGTCAATGCCAGATTACGTGCTAAGCACT | 17422 |
| gb:LC521925 | Organism:Severe | TTTCAATGGCCACAAATTATGATTTGAGTGTTGTCAATGCCAGATTACGTGCTAAGCACT | 17395 |
| gb:MT093571 | Organism:Severe | TTTCAATGGCCACGAATTATGATTTGAGTGTTGTCAATGCCAGATTACGTGCTAAGCACT | 17422 |
| gb:MT039887 | Organism:Severe | TTTCAATGGCTACAAATTATGATTTGAGTGTTGTCAATGCCAGATTACGTGCTAAGCACT | 17422 |
| gb:MT019530 | Organism:Severe | TTTCAATGGCCACAAATTATGATTTGAGTGTTGTCAATGCCAGATTACGTGCTAAGCACT | 17422 |
| gb:MT039888 | Organism:Severe | TTTCAATGGCCACAAATTATGATTTGAGTGTTGTCAATGCCAGATTACGTGCTAAGCACT | 17422 |
| gb:LC522972 | Organism:Severe | TTTCAATGGCCACAAATTATGATTTGAGTGTTGTCAATGCCAGATTACGTGCTAAGCACT | 17419 |
| gb:MT027063 | Organism:Severe | TTTCAATGGCCACAAATTATGATTTGAGTGTTGTCAATGCCAGATTACGTGCTAAGCACT | 17422 |
| gb:MT027062 | Organism:Severe | TTTCAATGGCCACAAATTATGATTTGAGTGTTGTCAATGCCAGATTACGTGCTAAGCACT | 17422 |
| gb:MT019529 | Organism:Severe | TTTCAATGGCCACAAATTATGATTTGAGTGTTGTCAATGCCAGATTACGTGCTAAGCACT | 17422 |
| gb:MN996529 | Organism:Severe | TTTCAATGGCCACAAATTATGATTTGAGTGTTGTCAATGCCAGATTACGTGCTAAGCACT | 17410 |
| gb:MN996531 | Organism:Severe | TTTCAATGGCCACAAATTATGATTTGAGTGTTGTCAATGCCAGATTACGTGCTAAGCACT | 17409 |
| gb:MT066176 | Organism:Severe | TTTCAATGGCCACAAATTATGATTTGAGTGTTGTCAATGCCAGATTACGTGCTAAGCACT | 17422 |
| gb:MT027064 | Organism:Severe | TTTCAATGGCCACAAATTATGATTTGAGTGTTGTCAATGCCAGATTACGTGCTAAGCACT | 17422 |
| gb:MN994468 | Organism:Severe | TTTCAATGGCCACAAATTATGATTTGAGTGTTGTCAATGCCAGATTACGTGCTAAGCACT | 17422 |
| gb:MT072688 | Organism:Severe | TTTCAATGGCCACAAATTATGATTTGAGTGTTGTCAATGCCAGATTACGTGCTAAGCACT | 17407 |
| gb:MN996527 | Organism:Severe | TTTCAATGGCCACAAATTATGATTTGAGTGTTGTCAATGCCAGATTACGTGCTAAGCACT | 17389 |
| gb:MT093631 | Organism:Severe | TTTCAATGGCCACAAATTATGATTTGAGTGTTGTCAATGCCAGATTACGTGCTAAGCACT | 17460 |
| gb:MT106053 | Organism:Severe | TTTCAATGGCCACAAATTATGATTTGAGTGTTGTCAATGCCAGATTACGTGCTAAGCACT | 17422 |
| gb:MT019533 | Organism:Severe | TTTCAATGGCCACAAATTATGATTTGAGTGTTGTCAATGCCAGATTACGTGCTAAGCACT | 17422 |
| gb:MT019531 | Organism:Severe | TTTCAATGGCCACAAATTATGATTTGAGTGTTGTCAATGCCAGATTACGTGCTAAGCACT | 17422 |
| gb:MN996528 | Organism:Severe | TTTCAATGGCCACAAATTATGATTTGAGTGTTGTCAATGCCAGATTACGTGCTAAGCACT | 17422 |
| gb:MN996530 | Organism:Severe | TTTCAATGGCCACAAATTATGATTTGAGTGTTGTCAATGCCAGATTACGTGCTAAGCACT | 17408 |
| gb:MN908947 | Organism:Severe | TTTCAATGGCCACAAATTATGATTTGAGTGTTGTCAATGCCAGATTACGTGCTAAGCACT | 17422 |
| gb:MT019532 | Organism:Severe | TTTCAATGGCCACAAATTATGATTTGAGTGTTGTCAATGCCAGATTACGTGCTAAGCACT | 17422 |

\*\*\*\*\*





|             |                 |                                                             |       |
|-------------|-----------------|-------------------------------------------------------------|-------|
| gb:MN988713 | Organism:Severe | CACTAGAACCAGAATATTTCAATTCAGTGTGTAGACTTATGAAAACATAGGTCCAGACA | 17542 |
| gb:LC521925 | Organism:Severe | CACTAGAACCAGAATATTTCAATTCAGTGTGTAGACTTATGAAAACATAGGTCCAGACA | 17515 |
| gb:MT093571 | Organism:Severe | CACTAGAACCAGAATATTTCAATTCAGTGTGTAGACTTATGAAAACATAGGTCCAGACA | 17542 |
| gb:MT039887 | Organism:Severe | CACTAGAACCAGAATATTTCAATTCAGTGTGTAGACTTATGAAAACATAGGTCCAGACA | 17542 |
| gb:MT019530 | Organism:Severe | CACTAGAACCAGAATATTTCAATTCAGTGTGTAGACTTATGAAAACATAGGTCCAGACA | 17542 |
| gb:MT039888 | Organism:Severe | CACTAGAACCAGAATATTTCAATTCAGTGTGTAGACTTATGAAAACATAGGTCCAGACA | 17542 |
| gb:LC522972 | Organism:Severe | CACTAGAACCAGAATATTTCAATTCAGTGTGTAGACTTATGAAAACATAGGTCCAGACA | 17539 |
| gb:MT027063 | Organism:Severe | CACTAGAACCAGAATATTTCAATTCAGTGTGTAGACTTATGAAAACATAGGTCCAGACA | 17542 |
| gb:MT027062 | Organism:Severe | CACTAGAACCAGAATATTTCAATTCAGTGTGTAGACTTATGAAAACATAGGTCCAGACA | 17542 |
| gb:MT019529 | Organism:Severe | CACTAGAACCAGAATATTTCAATTCAGTGTGTAGACTTATGAAAACATAGGTCCAGACA | 17542 |
| gb:MN996529 | Organism:Severe | CACTAGAACCAGAATATTTCAATTCAGTGTGTAGACTTATGAAAACATAGGTCCAGACA | 17530 |
| gb:MN996531 | Organism:Severe | CACTAGAACCAGAATATTTCAATTCAGTGTGTAGACTTATGAAAACATAGGTCCAGACA | 17529 |
| gb:MT066176 | Organism:Severe | CACTAGAACCAGAATATTTCAATTCAGTGTGTAGACTTATGAAAACATAGGTCCAGACA | 17542 |
| gb:MT027064 | Organism:Severe | CACTAGAACCAGAATATTTCAATTCAGTGTGTAGACTTATGAAAACATAGGTCCAGACA | 17542 |
| gb:MN994468 | Organism:Severe | CACTAGAACCAGAATATTTCAATTCAGTGTGTAGACTTATGAAAACATAGGTCCAGACA | 17542 |
| gb:MT072688 | Organism:Severe | CACTAGAACCAGAATATTTCAATTCAGTGTGTAGACTTATGAAAACATAGGTCCAGACA | 17527 |
| gb:MN996527 | Organism:Severe | CACTAGAACCAGAATATTTCAATTCAGTGTGTAGACTTATGAAAACATAGGTCCAGACA | 17509 |
| gb:MT093631 | Organism:Severe | CACTAGAACCAGAATATTTCAATTCAGTGTGTAGACTTATGAAAACATAGGTCCAGACA | 17580 |
| gb:MT106053 | Organism:Severe | CACTAGAACCAGAATATTTCAATTCAGTGTGTAGACTTATGAAAACATAGGTCCAGACA | 17542 |
| gb:MT019533 | Organism:Severe | CACTAGAACCAGAATATTTCAATTCAGTGTGTAGACTTATGAAAACATAGGTCCAGACA | 17542 |
| gb:MT019531 | Organism:Severe | CACTAGAACCAGAATATTTCAATTCAGTGTGTAGACTTATGAAAACATAGGTCCAGACA | 17542 |
| gb:MN996528 | Organism:Severe | CACTAGAACCAGAATATTTCAATTCAGTGTGTAGACTTATGAAAACATAGGTCCAGACA | 17542 |
| gb:MN996530 | Organism:Severe | CACTAGAACCAGAATATTTCAATTCAGTGTGTAGACTTATGAAAACATAGGTCCAGACA | 17528 |
| gb:MN908947 | Organism:Severe | CACTAGAACCAGAATATTTCAATTCAGTGTGTAGACTTATGAAAACATAGGTCCAGACA | 17542 |
| gb:MT019532 | Organism:Severe | CACTAGAACCAGAATATTTCAATTCAGTGTGTAGACTTATGAAAACATAGGTCCAGACA | 17542 |

\*\*\*\*\*

|             |                 |                                                              |       |
|-------------|-----------------|--------------------------------------------------------------|-------|
| gb:MT020781 | Organism:Severe | TGTTCCCTCGGAACCTGTGCGCGTTGTCTGCTGAAATTGTTGACACTGTGAGTGCTTTGG | 17590 |
| gb:MT007544 | Organism:Severe | TGTTCCCTCGGAACCTGTGCGCGTTGTCTGCTGAAATTGTTGACACTGTGAGTGCTTTGG | 17602 |
| gb:MN994467 | Organism:Severe | TGTTCCCTCGGAACCTGTGCGCGTTGTCTGCTGAAATTGTTGACACTGTGAGTGCTTTGG | 17602 |
| gb:MT044257 | Organism:Severe | TGTTCCCTCGGAACCTGTGCGCGTTGTCTGCTGAAATTGTTGACACTGTGAGTGCTTTGG | 17602 |
| gb:MT106054 | Organism:Severe | TGTTCCCTCGGAACCTGTGCGCGTTGTCTGCTGAAATTGTTGACACTGTGAGTGCTTTGG | 17602 |
| gb:MT049951 | Organism:Severe | TGTTCCCTCGGAACCTGTGCGCGTTGTCTGCTGAAATTGTTGACACTGTGAGTGCTTTGG | 17602 |
| gb:MN975262 | Organism:Severe | TGTTCCCTCGGAACCTGTGCGCGTTGTCTGCTGAAATTGTTGACACTGTGAGTGCTTTGG | 17602 |
| gb:MT106052 | Organism:Severe | TGTTCCCTCGGAACCTGTGCGCGTTGTCTGCTGAAATTGTTGACACTGTGAGTGCTTTGG | 17602 |
| gb:LC522975 | Organism:Severe | TGTTCCCTCGGAACCTGTGCGCGTTGTCTGCTGAAATTGTTGACACTGTGAGTGCTTTGG | 17599 |
| gb:LC522973 | Organism:Severe | TGTTCCCTCGGAACCTGTGCGCGTTGTCTGCTGAAATTGTTGACACTGTGAGTGCTTTGG | 17599 |
| gb:LC522974 | Organism:Severe | TGTTCCCTCGGAACCTGTGCGCGTTGTCTGCTGAAATTGTTGACACTGTGAGTGCTTTGG | 17599 |
| gb:MN985325 | Organism:Severe | TGTTCCCTCGGAACCTGTGCGCGTTGTCTGCTGAAATTGTTGACACTGTGAGTGCTTTGG | 17602 |
| gb:MT020881 | Organism:Severe | TGTTCCCTCGGAACCTGTGCGCGTTGTCTGCTGAAATTGTTGACACTGTGAGTGCTTTGG | 17602 |
| gb:MT020880 | Organism:Severe | TGTTCCCTCGGAACCTGTGCGCGTTGTCTGCTGAAATTGTTGACACTGTGAGTGCTTTGG | 17602 |
| gb:MT066175 | Organism:Severe | TGTTCCCTCGGAACCTGTGCGCGTTGTCTGCTGAAATTGTTGACACTGTGAGTGCTTTGG | 17602 |
| gb:MN997409 | Organism:Severe | TGTTCCCTCGGAACCTGTGCGCGTTGTCTGCTGAAATTGTTGACACTGTGAGTGCTTTGG | 17602 |
| gb:MN938384 | Organism:Severe | TGTTCCCTCGGAACCTGTGCGCGTTGTCTGCTGAAATTGTTGACACTGTGAGTGCTTTGG | 17570 |
| gb:MT044258 | Organism:Severe | TGTTCCCTCGGAACCTGTGCGCGTTGTCTGCTGAAATTGTTGACACTGTGAGTGCTTTGG | 17578 |
| gb:MT039890 | Organism:Severe | TGTTCCCTCGGAACCTGTGCGCGTTGTCTGCTGAAATTGTTGACACTGTGAGTGCTTTGG | 17602 |
| gb:MN988713 | Organism:Severe | TGTTCCCTCGGAACCTGTGCGCGTTGTCTGCTGAAATTGTTGACACTGTGAGTGCTTTGG | 17602 |
| gb:LC521925 | Organism:Severe | TGTTCCCTCGGAACCTGTGCGCGTTGTCTGCTGAAATTGTTGACACTGTGAGTGCTTTGG | 17575 |
| gb:MT093571 | Organism:Severe | TGTTCCCTCGGAACCTGTGCGCGTTGTCTGCTGAAATTGTTGACACTGTGAGTGCTTTGG | 17602 |
| gb:MT039887 | Organism:Severe | TGTTCCCTCGGAACCTGTGCGCGTTGTCTGCTGAAATTGTTGACACTGTGAGTGCTTTGG | 17602 |
| gb:MT019530 | Organism:Severe | TGTTCCCTCGGAACCTGTGCGCGTTGTCTGCTGAAATTGTTGACACTGTGAGTGCTTTGG | 17602 |
| gb:MT039888 | Organism:Severe | TGTTCCCTCGGAACCTGTGCGCGTTGTCTGCTGAAATTGTTGACACTGTGAGTGCTTTGG | 17602 |
| gb:LC522972 | Organism:Severe | TGTTCCCTCGGAACCTGTGCGCGTTGTCTGCTGAAATTGTTGACACTGTGAGTGCTTTGG | 17599 |
| gb:MT027063 | Organism:Severe | TGTTCCCTCGGAACCTGTGCGCGTTGTCTGCTGAAATTGTTGACACTGTGAGTGCTTTGG | 17602 |
| gb:MT027062 | Organism:Severe | TGTTCCCTCGGAACCTGTGCGCGTTGTCTGCTGAAATTGTTGACACTGTGAGTGCTTTGG | 17602 |
| gb:MT019529 | Organism:Severe | TGTTCCCTCGGAACCTGTGCGCGTTGTCTGCTGAAATTGTTGACACTGTGAGTGCTTTGG | 17602 |
| gb:MN996529 | Organism:Severe | TGTTCCCTCGGAACCTGTGCGCGTTGTCTGCTGAAATTGTTGACACTGTGAGTGCTTTGG | 17590 |
| gb:MN996531 | Organism:Severe | TGTTCCCTCGGAACCTGTGCGCGTTGTCTGCTGAAATTGTTGACACTGTGAGTGCTTTGG | 17589 |
| gb:MT066176 | Organism:Severe | TGTTCCCTCGGAACCTGTGCGCGTTGTCTGCTGAAATTGTTGACACTGTGAGTGCTTTGG | 17602 |
| gb:MT027064 | Organism:Severe | TGTTCCCTCGGAACCTGTGCGCGTTGTCTGCTGAAATTGTTGACACTGTGAGTGCTTTGG | 17602 |
| gb:MN994468 | Organism:Severe | TGTTCCCTCGGAACCTGTGCGCGTTGTCTGCTGAAATTGTTGACACTGTGAGTGCTTTGG | 17602 |
| gb:MT072688 | Organism:Severe | TGTTCCCTCGGAACCTGTGCGCGTTGTCTGCTGAAATTGTTGACACTGTGAGTGCTTTGG | 17587 |
| gb:MN996527 | Organism:Severe | TGTTCCCTCGGAACCTGTGCGCGTTGTCTGCTGAAATTGTTGACACTGTGAGTGCTTTGG | 17569 |
| gb:MT093631 | Organism:Severe | TGTTCCCTCGGAACCTGTGCGCGTTGTCTGCTGAAATTGTTGACACTGTGAGTGCTTTGG | 17640 |
| gb:MT106053 | Organism:Severe | TGTTCCCTCGGAACCTGTGCGCGTTGTCTGCTGAAATTGTTGACACTGTGAGTGCTTTGG | 17602 |

|             |                 |                                                            |       |
|-------------|-----------------|------------------------------------------------------------|-------|
| gb:MT019533 | Organism:Severe | TGTTCCCTCGGAACCTGTGCGCGTTGTCTGCTGAAATTGTTGACTGTGAGTGCTTTGG | 17602 |
| gb:MT019531 | Organism:Severe | TGTTCCCTCGGAACCTGTGCGCGTTGTCTGCTGAAATTGTTGACTGTGAGTGCTTTGG | 17602 |
| gb:MN996528 | Organism:Severe | TGTTCCCTCGGAACCTGTGCGCGTTGTCTGCTGAAATTGTTGACTGTGAGTGCTTTGG | 17602 |
| gb:MN996530 | Organism:Severe | TGTTCCCTCGGAACCTGTGCGCGTTGTCTGCTGAAATTGTTGACTGTGAGTGCTTTGG | 17588 |
| gb:MN908947 | Organism:Severe | TGTTCCCTCGGAACCTGTGCGCGTTGTCTGCTGAAATTGTTGACTGTGAGTGCTTTGG | 17602 |
| gb:MT019532 | Organism:Severe | TGTTCCCTCGGAACCTGTGCGCGTTGTCTGCTGAAATTGTTGACTGTGAGTGCTTTGG | 17602 |

\*\*\*\*\*

|             |                 |                                                              |       |
|-------------|-----------------|--------------------------------------------------------------|-------|
| gb:MT020781 | Organism:Severe | TTTATGATAATAAGCTTAAAGCACATAAAGACAAATCAGCTCAATGCTTTAAAATGTTTT | 17650 |
| gb:MT007544 | Organism:Severe | TTTATGATAATAAGCTTAAAGCACATAAAGACAAATCAGCTCAATGCTTTAAAATGTTTT | 17662 |
| gb:MN994467 | Organism:Severe | TTTATGATAATAAGCTTAAAGCACATAAAGACAAATCAGCTCAATGCTTTAAAATGTTTT | 17662 |
| gb:MT044257 | Organism:Severe | TTTATGATAATAAGCTTAAAGCACATAAAGACAAATCAGCTCAATGCTTTAAAATGTTTT | 17662 |
| gb:MT106054 | Organism:Severe | TTTATGATAATAAGCTTAAAGCACATAAAGACAAATCAGCTCAATGCTTTAAAATGTTTT | 17662 |
| gb:MT049951 | Organism:Severe | TTTATGATAATAAGCTTAAAGCACATAAAGACAAATCAGCTCAATGCTTTAAAATGTTTT | 17662 |
| gb:MN975262 | Organism:Severe | TTTATGATAATAAGCTTAAAGCACATAAAGACAAATCAGCTCAATGCTTTAAAATGTTTT | 17662 |
| gb:MT106052 | Organism:Severe | TTTATGATAATAAGCTTAAAGCACATAAAGACAAATCAGCTCAATGCTTTAAAATGTTTT | 17662 |
| gb:LC522975 | Organism:Severe | TTTATGATAATAAGCTTAAAGCACATAAAGACAAATCAGCTCAATGCTTTAAAATGTTTT | 17659 |
| gb:LC522973 | Organism:Severe | TTTATGATAATAAGCTTAAAGCACATAAAGACAAATCAGCTCAATGCTTTAAAATGTTTT | 17659 |
| gb:LC522974 | Organism:Severe | TTTATGATAATAAGCTTAAAGCACATAAAGACAAATCAGCTCAATGCTTTAAAATGTTTT | 17659 |
| gb:MN985325 | Organism:Severe | TTTATGATAATAAGCTTAAAGCACATAAAGACAAATCAGCTCAATGCTTTAAAATGTTTT | 17662 |
| gb:MT020881 | Organism:Severe | TTTATGATAATAAGCTTAAAGCACATAAAGACAAATCAGCTCAATGCTTTAAAATGTTTT | 17662 |
| gb:MT020880 | Organism:Severe | TTTATGATAATAAGCTTAAAGCACATAAAGACAAATCAGCTCAATGCTTTAAAATGTTTT | 17662 |
| gb:MT066175 | Organism:Severe | TTTATGATAATAAGCTTAAAGCACATAAAGACAAATCAGCTCAATGCTTTAAAATGTTTT | 17662 |
| gb:MN997409 | Organism:Severe | TTTATGATAATAAGCTTAAAGCACATAAAGACAAATCAGCTCAATGCTTTAAAATGTTTT | 17662 |
| gb:MN938384 | Organism:Severe | TTTATGATAATAAGCTTAAAGCACATAAAGACAAATCAGCTCAATGCTTTAAAATGTTTT | 17630 |
| gb:MT044258 | Organism:Severe | TTTATGATAATAAGCTTAAAGCACATAAAGACAAATCAGCTCAATGCTTTAAAATGTTTT | 17638 |
| gb:MT039890 | Organism:Severe | TTTATGATAATAAGCTTAAAGCACATAAAGACAAATCAGCTCAATGCTTTAAAATGTTTT | 17662 |
| gb:MN988713 | Organism:Severe | TTTATGATAATAAGCTTAAAGCACATAAAGACAAATCAGCTCAATGCTTTAAAATGTTTT | 17662 |
| gb:LC521925 | Organism:Severe | TTTATGATAATAAGCTTAAAGCACATAAAGACAAATCAGCTCAATGCTTTAAAATGTTTT | 17635 |
| gb:MT093571 | Organism:Severe | TTTATGATAATAAGCTTAAAGCACATAAAGACAAATCAGCTCAATGCTTTAAAATGTTTT | 17662 |
| gb:MT039887 | Organism:Severe | TTTATGATAATAAGCTTAAAGCACATAAAGACAAATCAGCTCAATGCTTTAAAATGTTTT | 17662 |
| gb:MT019530 | Organism:Severe | TTTATGATAATAAGCTTAAAGCACATAAAGACAAATCAGCTCAATGCTTTAAAATGTTTT | 17662 |
| gb:MT039888 | Organism:Severe | TTTATGATAATAAGCTTAAAGCACATAAAGACAAATCAGCTCAATGCTTTAAAATGTTTT | 17662 |
| gb:LC522972 | Organism:Severe | TTTATGATAATAAGCTTAAAGCACATAAAGACAAATCAGCTCAATGCTTTAAAATGTTTT | 17659 |
| gb:MT027063 | Organism:Severe | TTTATGATAATAAGCTTAAAGCACATAAAGACAAATCAGCTCAATGCTTTAAAATGTTTT | 17662 |
| gb:MT027062 | Organism:Severe | TTTATGATAATAAGCTTAAAGCACATAAAGACAAATCAGCTCAATGCTTTAAAATGTTTT | 17662 |
| gb:MT019529 | Organism:Severe | TTTATGATAATAAGCTTAAAGCACATAAAGACAAATCAGCTCAATGCTTTAAAATGTTTT | 17662 |
| gb:MN996529 | Organism:Severe | TTTATGATAATAAGCTTAAAGCACATAAAGACAAATCAGCTCAATGCTTTAAAATGTTTT | 17650 |
| gb:MN996531 | Organism:Severe | TTTATGATAATAAGCTTAAAGCACATAAAGACAAATCAGCTCAATGCTTTAAAATGTTTT | 17649 |
| gb:MT066176 | Organism:Severe | TTTATGATAATAAGCTTAAAGCACATAAAGACAAATCAGCTCAATGCTTTAAAATGTTTT | 17662 |
| gb:MT027064 | Organism:Severe | TTTATGATAATAAGCTTAAAGCACATAAAGACAAATCAGCTCAATGCTTTAAAATGTTTT | 17662 |
| gb:MN994468 | Organism:Severe | TTTATGATAATAAGCTTAAAGCACATAAAGACAAATCAGCTCAATGCTTTAAAATGTTTT | 17662 |
| gb:MT072688 | Organism:Severe | TTTATGATAATAAGCTTAAAGCACATAAAGACAAATCAGCTCAATGCTTTAAAATGTTTT | 17647 |
| gb:MN996527 | Organism:Severe | TTTATGATAATAAGCTTAAAGCACATAAAGACAAATCAGCTCAATGCTTTAAAATGTTTT | 17629 |
| gb:MT093631 | Organism:Severe | TTTATGATAATAAGCTTAAAGCACATAAAGACAAATCAGCTCAATGCTTTAAAATGTTTT | 17700 |
| gb:MT106053 | Organism:Severe | TTTATGATAATAAGCTTAAAGCACATAAAGACAAATCAGCTCAATGCTTTAAAATGTTTT | 17662 |
| gb:MT019533 | Organism:Severe | TTTATGATAATAAGCTTAAAGCACATAAAGACAAATCAGCTCAATGCTTTAAAATGTTTT | 17662 |
| gb:MT019531 | Organism:Severe | TTTATGATAATAAGCTTAAAGCACATAAAGACAAATCAGCTCAATGCTTTAAAATGTTTT | 17662 |
| gb:MN996528 | Organism:Severe | TTTATGATAATAAGCTTAAAGCACATAAAGACAAATCAGCTCAATGCTTTAAAATGTTTT | 17662 |
| gb:MN996530 | Organism:Severe | TTTATGATAATAAGCTTAAAGCACATAAAGACAAATCAGCTCAATGCTTTAAAATGTTTT | 17648 |
| gb:MN908947 | Organism:Severe | TTTATGATAATAAGCTTAAAGCACATAAAGACAAATCAGCTCAATGCTTTAAAATGTTTT | 17662 |
| gb:MT019532 | Organism:Severe | TTTATGATAATAAGCTTAAAGCACATAAAGACAAATCAGCTCAATGCTTTAAAATGTTTT | 17662 |

\*\*\*\*\*

|             |                 |                                                             |       |
|-------------|-----------------|-------------------------------------------------------------|-------|
| gb:MT020781 | Organism:Severe | ATAAGGGTGTATCACGCATGATGTTTCATCTGCAATTAACAGGCCACAAATAGGCGTGG | 17710 |
| gb:MT007544 | Organism:Severe | ATAAGGGTGTATCACGCATGATGTTTCATCTGCAATTAACAGGCCACAAATAGGCGTGG | 17722 |
| gb:MN994467 | Organism:Severe | ATAAGGGTGTATCACGCATGATGTTTCATCTGCAATTAACAGGCCACAAATAGGCGTGG | 17722 |
| gb:MT044257 | Organism:Severe | ATAAGGGTGTATCACGCATGATGTTTCATCTGCAATTAACAGGCCACAAATAGGCGTGG | 17722 |
| gb:MT106054 | Organism:Severe | ATAAGGGTGTATCACGCATGATGTTTCATCTGCAATTAACAGGCCACAAATAGGCGTGG | 17722 |
| gb:MT049951 | Organism:Severe | ATAAGGGTGTATCACGCATGATGTTTCATCTGCAATTAACAGGCCACAAATAGGCGTGG | 17722 |
| gb:MN975262 | Organism:Severe | ATAAGGGTGTATCACGCATGATGTTTCATCTGCAATTAACAGGCCACAAATAGGCGTGG | 17722 |
| gb:MT106052 | Organism:Severe | ATAAGGGTGTATCACGCATGATGTTTCATCTGCAATTAACAGGCCACAAATAGGCGTGG | 17722 |
| gb:LC522975 | Organism:Severe | ATAAGGGTGTATCACGCATGATGTTTCATCTGCAATTAACAGGCCACAAATAGGCGTGG | 17719 |
| gb:LC522973 | Organism:Severe | ATAAGGGTGTATCACGCATGATGTTTCATCTGCAATTAACAGGCCACAAATAGGCGTGG | 17719 |
| gb:LC522974 | Organism:Severe | ATAAGGGTGTATCACGCATGATGTTTCATCTGCAATTAACAGGCCACAAATAGGCGTGG | 17719 |



|             |                 |                                                              |       |
|-------------|-----------------|--------------------------------------------------------------|-------|
| gb:MN996531 | Organism:Severe | TAAGAGAATTCCTTACACGTAACCCGCTTGGAGAAAAGCTGTCTTTATTTACACCTTATA | 17769 |
| gb:MT066176 | Organism:Severe | TAAGAGAATTCCTTACACGTAACCCGCTTGGAGAAAAGCTGTCTTTATTTACACCTTATA | 17782 |
| gb:MT027064 | Organism:Severe | TAAGAGAATTCCTTACACGTAACCCGCTTGGAGAAAAGCTGTCTTTATTTACACCTTATA | 17782 |
| gb:MN994468 | Organism:Severe | TAAGAGAATTCCTTACACGTAACCCGCTTGGAGAAAAGCTGTCTTTATTTACACCTTATA | 17782 |
| gb:MT072688 | Organism:Severe | TAAGAGAATTCCTTACACGTAACCCGCTTGGAGAAAAGCTGTCTTTATTTACACCTTATA | 17767 |
| gb:MN996527 | Organism:Severe | TAAGAGAATTCCTTACACGTAACCCGCTTGGAGAAAAGCTGTCTTTATTTACACCTTATA | 17749 |
| gb:MT093631 | Organism:Severe | TAAGAGAATTCCTTACACGTAACCCGCTTGGAGAAAAGCTGTCTTTATTTACACCTTATA | 17820 |
| gb:MT106053 | Organism:Severe | TAAGAGAATTCCTTACACGTAACCCGCTTGGAGAAAAGCTGTCTTTATTTACACCTTATA | 17782 |
| gb:MT019533 | Organism:Severe | TAAGAGAATTCCTTACACGTAACCCGCTTGGAGAAAAGCTGTCTTTATTTACACCTTATA | 17782 |
| gb:MT019531 | Organism:Severe | TAAGAGAATTCCTTACACGTAACCCGCTTGGAGAAAAGCTGTCTTTATTTACACCTTATA | 17782 |
| gb:MN996528 | Organism:Severe | TAAGAGAATTCCTTACACGTAACCCGCTTGGAGAAAAGCTGTCTTTATTTACACCTTATA | 17782 |
| gb:MN996530 | Organism:Severe | TAAGAGAATTCCTTACACGTAACCCGCTTGGAGAAAAGCTGTCTTTATTTACACCTTATA | 17768 |
| gb:MN908947 | Organism:Severe | TAAGAGAATTCCTTACACGTAACCCGCTTGGAGAAAAGCTGTCTTTATTTACACCTTATA | 17782 |
| gb:MT019532 | Organism:Severe | TAAGAGAATTCCTTACACGTAACCCGCTTGGAGAAAAGCTGTCTTTATTTACACCTTATA | 17782 |

\*\*\*\*\*

|             |                 |                                                              |       |
|-------------|-----------------|--------------------------------------------------------------|-------|
| gb:MT020781 | Organism:Severe | ATTCACAGAATGCTGTAGCCTCAAAGATTTGGGACTACCAACTCAAAGCTGTTGATTCAT | 17830 |
| gb:MT007544 | Organism:Severe | ATTCACAGAATGCTGTAGCCTCAAAGATTTGGGACTACCAACTCAAAGCTGTTGATTCAT | 17842 |
| gb:MN994467 | Organism:Severe | ATTCACAGAATGCTGTAGCCTCAAAGATTTGGGACTACCAACTCAAAGCTGTTGATTCAT | 17842 |
| gb:MT044257 | Organism:Severe | ATTCACAGAATGCTGTAGCCTCAAAGATTTGGGACTACCAACTCAAAGCTGTTGATTCAT | 17842 |
| gb:MT106054 | Organism:Severe | ATTCACAGAATGCTGTAGCCTCAAAGATTTGGGACTACCAACTCAAAGCTGTTGATTCAT | 17842 |
| gb:MT049951 | Organism:Severe | ATTCACAGAATGCTGTAGCCTCAAAGATTTGGGACTACCAACTCAAAGCTGTTGATTCAT | 17842 |
| gb:MN975262 | Organism:Severe | ATTCACAGAATGCTGTAGCCTCAAAGATTTGGGACTACCAACTCAAAGCTGTTGATTCAT | 17842 |
| gb:MT106052 | Organism:Severe | ATTCACAGAATGCTGTAGCCTCAAAGATTTGGGACTACCAACTCAAAGCTGTTGATTCAT | 17842 |
| gb:LC522975 | Organism:Severe | ATTCACAGAATGCTGTAGCCTCAAAGATTTGGGACTACCAACTCAAAGCTGTTGATTCAT | 17839 |
| gb:LC522973 | Organism:Severe | ATTCACAGAATGCTGTAGCCTCAAAGATTTGGGACTACCAACTCAAAGCTGTTGATTCAT | 17839 |
| gb:LC522974 | Organism:Severe | ATTCACAGAATGCTGTAGCCTCAAAGATTTGGGACTACCAACTCAAAGCTGTTGATTCAT | 17839 |
| gb:MN985325 | Organism:Severe | ATTCACAGAATGCTGTAGCCTCAAAGATTTGGGACTACCAACTCAAAGCTGTTGATTCAT | 17842 |
| gb:MT020881 | Organism:Severe | ATTCACAGAATGCTGTAGCCTCAAAGATTTGGGACTACCAACTCAAAGCTGTTGATTCAT | 17842 |
| gb:MT020880 | Organism:Severe | ATTCACAGAATGCTGTAGCCTCAAAGATTTGGGACTACCAACTCAAAGCTGTTGATTCAT | 17842 |
| gb:MT066175 | Organism:Severe | ATTCACAGAATGCTGTAGCCTCAAAGATTTGGGACTACCAACTCAAAGCTGTTGATTCAT | 17842 |
| gb:MN997409 | Organism:Severe | ATTCACAGAATGCTGTAGCCTCAAAGATTTGGGACTACCAACTCAAAGCTGTTGATTCAT | 17842 |
| gb:MN938384 | Organism:Severe | ATTCACAGAATGCTGTAGCCTCAAAGATTTGGGACTACCAACTCAAAGCTGTTGATTCAT | 17810 |
| gb:MT044258 | Organism:Severe | ATTCACAGAATGCTGTAGCCTCAAAGATTTGGGACTACCAACTCAAAGCTGTTGATTCAT | 17818 |
| gb:MT039890 | Organism:Severe | ATTCACAGAATGCTGTAGCCTCAAAGATTTGGGACTACCAACTCAAAGCTGTTGATTCAT | 17842 |
| gb:MN988713 | Organism:Severe | ATTCACAGAATGCTGTAGCCTCAAAGATTTGGGACTACCAACTCAAAGCTGTTGATTCAT | 17842 |
| gb:LC521925 | Organism:Severe | ATTCACAGAATGCTGTAGCCTCAAAGATTTGGGACTACCAACTCAAAGCTGTTGATTCAT | 17815 |
| gb:MT093571 | Organism:Severe | ATTCACAGAATGCTGTAGCCTCAAAGATTTGGGACTACCAACTCAAAGCTGTTGATTCAT | 17842 |
| gb:MT039887 | Organism:Severe | ATTCACAGAATGCTGTAGCCTCAAAGATTTGGGACTACCAACTCAAAGCTGTTGATTCAT | 17842 |
| gb:MT019530 | Organism:Severe | ATTCACAGAATGCTGTAGCCTCAAAGATTTGGGACTACCAACTCAAAGCTGTTGATTCAT | 17842 |
| gb:MT039888 | Organism:Severe | ATTCACAGAATGCTGTAGCCTCAAAGATTTGGGACTACCAACTCAAAGCTGTTGATTCAT | 17842 |
| gb:LC522972 | Organism:Severe | ATTCACAGAATGCTGTAGCCTCAAAGATTTGGGACTACCAACTCAAAGCTGTTGATTCAT | 17839 |
| gb:MT027063 | Organism:Severe | ATTCACAGAATGCTGTAGCCTCAAAGATTTGGGACTACCAACTCAAAGCTGTTGATTCAT | 17842 |
| gb:MT027062 | Organism:Severe | ATTCACAGAATGCTGTAGCCTCAAAGATTTGGGACTACCAACTCAAAGCTGTTGATTCAT | 17842 |
| gb:MT019529 | Organism:Severe | ATTCACAGAATGCTGTAGCCTCAAAGATTTGGGACTACCAACTCAAAGCTGTTGATTCAT | 17842 |
| gb:MN996529 | Organism:Severe | ATTCACAGAATGCTGTAGCCTCAAAGATTTGGGACTACCAACTCAAAGCTGTTGATTCAT | 17830 |
| gb:MN996531 | Organism:Severe | ATTCACAGAATGCTGTAGCCTCAAAGATTTGGGACTACCAACTCAAAGCTGTTGATTCAT | 17829 |
| gb:MT066176 | Organism:Severe | ATTCACAGAATGCTGTAGCCTCAAAGATTTGGGACTACCAACTCAAAGCTGTTGATTCAT | 17842 |
| gb:MT027064 | Organism:Severe | ATTCACAGAATGCTGTAGCCTCAAAGATTTGGGACTACCAACTCAAAGCTGTTGATTCAT | 17842 |
| gb:MN994468 | Organism:Severe | ATTCACAGAATGCTGTAGCCTCAAAGATTTGGGACTACCAACTCAAAGCTGTTGATTCAT | 17842 |
| gb:MT072688 | Organism:Severe | ATTCACAGAATGCTGTAGCCTCAAAGATTTGGGACTACCAACTCAAAGCTGTTGATTCAT | 17827 |
| gb:MN996527 | Organism:Severe | ATTCACAGAATGCTGTAGCCTCAAAGATTTGGGACTACCAACTCAAAGCTGTTGATTCAT | 17809 |
| gb:MT093631 | Organism:Severe | ATTCACAGAATGCTGTAGCCTCAAAGATTTGGGACTACCAACTCAAAGCTGTTGATTCAT | 17880 |
| gb:MT106053 | Organism:Severe | ATTCACAGAATGCTGTAGCCTCAAAGATTTGGGACTACCAACTCAAAGCTGTTGATTCAT | 17842 |
| gb:MT019533 | Organism:Severe | ATTCACAGAATGCTGTAGCCTCAAAGATTTGGGACTACCAACTCAAAGCTGTTGATTCAT | 17842 |
| gb:MT019531 | Organism:Severe | ATTCACAGAATGCTGTAGCCTCAAAGATTTGGGACTACCAACTCAAAGCTGTTGATTCAT | 17842 |
| gb:MN996528 | Organism:Severe | ATTCACAGAATGCTGTAGCCTCAAAGATTTGGGACTACCAACTCAAAGCTGTTGATTCAT | 17842 |
| gb:MN996530 | Organism:Severe | ATTCACAGAATGCTGTAGCCTCAAAGATTTGGGACTACCAACTCAAAGCTGTTGATTCAT | 17828 |
| gb:MN908947 | Organism:Severe | ATTCACAGAATGCTGTAGCCTCAAAGATTTGGGACTACCAACTCAAAGCTGTTGATTCAT | 17842 |
| gb:MT019532 | Organism:Severe | ATTCACAGAATGCTGTAGCCTCAAAGATTTGGGACTACCAACTCAAAGCTGTTGATTCAT | 17842 |

\*\*\*\*\*

|             |                 |                                                            |       |
|-------------|-----------------|------------------------------------------------------------|-------|
| gb:MT020781 | Organism:Severe | CACAGGGCTCAGAATATGACTATGTCATATTCCTCAAACCCTGAAACAGCTCACTCTT | 17890 |
| gb:MT007544 | Organism:Severe | CACAGGGCTCAGAATATGACTATGTCATATTCCTCAAACCCTGAAACAGCTCACTCTT | 17902 |
| gb:MN994467 | Organism:Severe | CACAGGGCTCAGAATATGACTATGTCATATTCCTCAAACCCTGAAACAGCTCACTCTT | 17902 |

|             |                  |                                                            |       |
|-------------|------------------|------------------------------------------------------------|-------|
| gb:MT044257 | Organism: Severe | CACAGGGCTCAGAATATGACTATGTCATATTCCTCAAACCCTGAAACAGCTCACTCTT | 17902 |
| gb:MT106054 | Organism: Severe | CACAGGGCTCAGAATATGACTATGTCATATTCCTCAAACCCTGAAACAGCTCACTCTT | 17902 |
| gb:MT049951 | Organism: Severe | CACAGGGCTCAGAATATGACTATGTCATATTCCTCAAACCCTGAAACAGCTCACTCTT | 17902 |
| gb:MN975262 | Organism: Severe | CACAGGGCTCAGAATATGACTATGTCATATTCCTCAAACCCTGAAACAGCTCACTCTT | 17902 |
| gb:MT106052 | Organism: Severe | CACAGGGCTCAGAATATGACTATGTCATATTCCTCAAACCCTGAAACAGCTCACTCTT | 17902 |
| gb:LC522975 | Organism: Severe | CACAGGGCTCAGAATATGACTATGTCATATTCCTCAAACCCTGAAACAGCTCACTCTT | 17899 |
| gb:LC522973 | Organism: Severe | CACAGGGCTCAGAATATGACTATGTCATATTCCTCAAACCCTGAAACAGCTCACTCTT | 17899 |
| gb:LC522974 | Organism: Severe | CACAGGGCTCAGAATATGACTATGTCATATTCCTCAAACCCTGAAACAGCTCACTCTT | 17899 |
| gb:MN985325 | Organism: Severe | CACAGGGCTCAGAATATGACTATGTCATATTCCTCAAACCCTGAAACAGCTCACTCTT | 17902 |
| gb:MT020881 | Organism: Severe | CACAGGGCTCAGAATATGACTATGTCATATTCCTCAAACCCTGAAACAGCTCACTCTT | 17902 |
| gb:MT020880 | Organism: Severe | CACAGGGCTCAGAATATGACTATGTCATATTCCTCAAACCCTGAAACAGCTCACTCTT | 17902 |
| gb:MT066175 | Organism: Severe | CACAGGGCTCAGAATATGACTATGTCATATTCCTCAAACCCTGAAACAGCTCACTCTT | 17902 |
| gb:MN997409 | Organism: Severe | CACAGGGCTCAGAATATGACTATGTCATATTCCTCAAACCCTGAAACAGCTCACTCTT | 17902 |
| gb:MN938384 | Organism: Severe | CACAGGGCTCAGAATATGACTATGTCATATTCCTCAAACCCTGAAACAGCTCACTCTT | 17870 |
| gb:MT044258 | Organism: Severe | CACAGGGCTCAGAATATGACTATGTCATATTCCTCAAACCCTGAAACAGCTCACTCTT | 17878 |
| gb:MT039890 | Organism: Severe | CACAGGGCTCAGAATATGACTATGTCATATTCCTCAAACCCTGAAACAGCTCACTCTT | 17902 |
| gb:MN988713 | Organism: Severe | CACAGGGCTCAGAATATGACTATGTCATATTCCTCAAACCCTGAAACAGCTCACTCTT | 17902 |
| gb:LC521925 | Organism: Severe | CACAGGGCTCAGAATATGACTATGTCATATTCCTCAAACCCTGAAACAGCTCACTCTT | 17875 |
| gb:MT093571 | Organism: Severe | CACAGGGCTCAGAATATGACTATGTCATATTCCTCAAACCCTGAAACAGCTCACTCTT | 17902 |
| gb:MT039887 | Organism: Severe | CACAGGGCTCAGAATATGACTATGTCATATTCCTCAAACCCTGAAACAGCTCACTCTT | 17902 |
| gb:MT019530 | Organism: Severe | CACAGGGCTCAGAATATGACTATGTCATATTCCTCAAACCCTGAAACAGCTCACTCTT | 17902 |
| gb:MT039888 | Organism: Severe | CACAGGGCTCAGAATATGACTATGTCATATTCCTCAAACCCTGAAACAGCTCACTCTT | 17902 |
| gb:LC522972 | Organism: Severe | CACAGGGCTCAGAATATGACTATGTCATATTCCTCAAACCCTGAAACAGCTCACTCTT | 17899 |
| gb:MT027063 | Organism: Severe | CACAGGGCTCAGAATATGACTATGTCATATTCCTCAAACCCTGAAACAGCTCACTCTT | 17902 |
| gb:MT027062 | Organism: Severe | CACAGGGCTCAGAATATGACTATGTCATATTCCTCAAACCCTGAAACAGCTCACTCTT | 17902 |
| gb:MT019529 | Organism: Severe | CACAGGGCTCAGAATATGACTATGTCATATTCCTCAAACCCTGAAACAGCTCACTCTT | 17902 |
| gb:MN996529 | Organism: Severe | CACAGGGCTCAGAATATGACTATGTCATATTCCTCAAACCCTGAAACAGCTCACTCTT | 17890 |
| gb:MN996531 | Organism: Severe | CACAGGGCTCAGAATATGACTATGTCATATTCCTCAAACCCTGAAACAGCTCACTCTT | 17889 |
| gb:MT066176 | Organism: Severe | CACAGGGCTCAGAATATGACTATGTCATATTCCTCAAACCCTGAAACAGCTCACTCTT | 17902 |
| gb:MT027064 | Organism: Severe | CACAGGGCTCAGAATATGACTATGTCATATTCCTCAAACCCTGAAACAGCTCACTCTT | 17902 |
| gb:MN994468 | Organism: Severe | CACAGGGCTCAGAATATGACTATGTCATATTCCTCAAACCCTGAAACAGCTCACTCTT | 17902 |
| gb:MT072688 | Organism: Severe | CACAGGGCTCAGAATATGACTATGTCATATTCCTCAAACCCTGAAACAGCTCACTCTT | 17887 |
| gb:MN996527 | Organism: Severe | CACAGGGCTCAGAATATGACTATGTCATATTCCTCAAACCCTGAAACAGCTCACTCTT | 17869 |
| gb:MT093631 | Organism: Severe | CACAGGGCTCAGAATATGACTATGTCATATTCCTCAAACCCTGAAACAGCTCACTCTT | 17940 |
| gb:MT106053 | Organism: Severe | CACAGGGCTCAGAATATGACTATGTCATATTCCTCAAACCCTGAAACAGCTCACTCTT | 17902 |
| gb:MT019533 | Organism: Severe | CACAGGGCTCAGAATATGACTATGTCATATTCCTCAAACCCTGAAACAGCTCACTCTT | 17902 |
| gb:MT019531 | Organism: Severe | CACAGGGCTCAGAATATGACTATGTCATATTCCTCAAACCCTGAAACAGCTCACTCTT | 17902 |
| gb:MN996528 | Organism: Severe | CACAGGGCTCAGAATATGACTATGTCATATTCCTCAAACCCTGAAACAGCTCACTCTT | 17902 |
| gb:MN996530 | Organism: Severe | CACAGGGCTCAGAATATGACTATGTCATATTCCTCAAACCCTGAAACAGCTCACTCTT | 17888 |
| gb:MN908947 | Organism: Severe | CACAGGGCTCAGAATATGACTATGTCATATTCCTCAAACCCTGAAACAGCTCACTCTT | 17902 |
| gb:MT019532 | Organism: Severe | CACAGGGCTCAGAATATGACTATGTCATATTCCTCAAACCCTGAAACAGCTCACTCTT | 17902 |

\*\*\*\*\*

|             |                  |                                                             |       |
|-------------|------------------|-------------------------------------------------------------|-------|
| gb:MT020781 | Organism: Severe | GTAATGTAACAGATTTAATGTTGCTATTACCAGAGCAAAAGTAGGCATACCTTGCATAA | 17950 |
| gb:MT007544 | Organism: Severe | GTAATGTAACAGATTTAATGTTGCTATTACCAGAGCAAAAGTAGGCATACCTTGCATAA | 17962 |
| gb:MN994467 | Organism: Severe | GTAATGTAACAGATTTAATGTTGCTATTACCAGAGCAAAAGTAGGCATACCTTGCATAA | 17962 |
| gb:MT044257 | Organism: Severe | GTAATGTAACAGATTTAATGTTGCTATTACCAGAGCAAAAGTAGGCATACCTTGCATAA | 17962 |
| gb:MT106054 | Organism: Severe | GTAATGTAACAGATTTAATGTTGCTATTACCAGAGCAAAAGTAGGCATACCTTGCATAA | 17962 |
| gb:MT049951 | Organism: Severe | GTAATGTAACAGATTTAATGTTGCTATTACCAGAGCAAAAGTAGGCATACCTTGCATAA | 17962 |
| gb:MN975262 | Organism: Severe | GTAATGTAACAGATTTAATGTTGCTATTACCAGAGCAAAAGTAGGCATACCTTGCATAA | 17962 |
| gb:MT106052 | Organism: Severe | GTAATGTAACAGATTTAATGTTGCTATTACCAGAGCAAAAGTAGGCATACCTTGCATAA | 17962 |
| gb:LC522975 | Organism: Severe | GTAATGTAACAGATTTAATGTTGCTATTACCAGAGCAAAAGTAGGCATACCTTGCATAA | 17959 |
| gb:LC522973 | Organism: Severe | GTAATGTAACAGATTTAATGTTGCTATTACCAGAGCAAAAGTAGGCATACCTTGCATAA | 17959 |
| gb:LC522974 | Organism: Severe | GTAATGTAACAGATTTAATGTTGCTATTACCAGAGCAAAAGTAGGCATACCTTGCATAA | 17959 |
| gb:MN985325 | Organism: Severe | GTAATGTAACAGATTTAATGTTGCTATTACCAGAGCAAAAGTAGGCATACCTTGCATAA | 17962 |
| gb:MT020881 | Organism: Severe | GTAATGTAACAGATTTAATGTTGCTATTACCAGAGCAAAAGTAGGCATACCTTGCATAA | 17962 |
| gb:MT020880 | Organism: Severe | GTAATGTAACAGATTTAATGTTGCTATTACCAGAGCAAAAGTAGGCATACCTTGCATAA | 17962 |
| gb:MT066175 | Organism: Severe | GTAATGTAACAGATTTAATGTTGCTATTACCAGAGCAAAAGTAGGCATACCTTGCATAA | 17962 |
| gb:MN997409 | Organism: Severe | GTAATGTAACAGATTTAATGTTGCTATTACCAGAGCAAAAGTAGGCATACCTTGCATAA | 17962 |
| gb:MN938384 | Organism: Severe | GTAATGTAACAGATTTAATGTTGCTATTACCAGAGCAAAAGTAGGCATACCTTGCATAA | 17930 |
| gb:MT044258 | Organism: Severe | GTAATGTAACAGATTTAATGTTGCTATTACCAGAGCAAAAGTAGGCATACCTTGCATAA | 17938 |
| gb:MT039890 | Organism: Severe | GTAATGTAACAGATTTAATGTTGCTATTACCAGAGCAAAAGTAGGCATACCTTGCATAA | 17962 |
| gb:MN988713 | Organism: Severe | GTAATGTAACAGATTTAATGTTGCTATTACCAGAGCAAAAGTAGGCATACCTTGCATAA | 17962 |
| gb:LC521925 | Organism: Severe | GTAATGTAACAGATTTAATGTTGCTATTACCAGAGCAAAAGTAGGCATACCTTGCATAA | 17935 |
| gb:MT093571 | Organism: Severe | GTAATGTAACAGATTTAATGTTGCTATTACCAGAGCAAAAGTAGGCATACCTTGCATAA | 17962 |



|             |                  |                                                                        |       |
|-------------|------------------|------------------------------------------------------------------------|-------|
| gb:MN996530 | Organism: Severe | TGTCTGATAGAGACCTTTATGACAAGTTGCAATTTACAAGTCTTGAATTCACGTAGGA             | 18008 |
| gb:MN908947 | Organism: Severe | TGTCTGATAGAGACCTTTATGACAAGTTGCAATTTACAAGTCTTGAATTCACGTAGGA             | 18022 |
| gb:MT019532 | Organism: Severe | TGTCTGATAGAGACCTTTATGACAAGTTGCAATTTACAAGTCTTGAATTCACGTAGGA<br>*****    | 18022 |
| gb:MT020781 | Organism: Severe | ATGTGGCAACTTTACAAGCTGAAAATGTAACAGGACTCTTTAAAGATTGTAGTAAAGGTAA          | 18070 |
| gb:MT007544 | Organism: Severe | ATGTGGCAACTTTACAAGCTGAAAATGTAACAGGACTCTTTAAAGATTGTAGTAAAGGTAA          | 18082 |
| gb:MN994467 | Organism: Severe | ATGTGGCAACTTTACAAGCTGAAAATGTAACAGGACTCTTTAAAGATTGTAGTAAAGGTAA          | 18082 |
| gb:MT044257 | Organism: Severe | ATGTGGCAACTTTACAAGCTGAAAATGTAACAGGACTCTTTAAAGATTGTAGTAAAGGTAA          | 18082 |
| gb:MT106054 | Organism: Severe | ATGTGGCAACTTTACAAGCTGAAAATGTAACAGGACTCTTTAAAGATTGTAGTAAAGGTAA          | 18082 |
| gb:MT049951 | Organism: Severe | ATGTGGCAACTTTACAAGCTGAAAATGTAACAGGACTCTTTAAAGATTGTAGTAAAGGTAA          | 18082 |
| gb:MN975262 | Organism: Severe | ATGTGGCAACTTTACAAGCTGAAAATGTAACAGGACTCTTTAAAGATTGTAGTAAAGGTAA          | 18082 |
| gb:MT106052 | Organism: Severe | ATGTGGCAACTTTACAAGCTGAAAATGTAACAGGACTCTTTAAAGATTGTAGTAAAGGTAA          | 18082 |
| gb:LC522975 | Organism: Severe | ATGTGGCAACTTTACAAGCTGAAAATGTAACAGGACTCTTTAAAGATTGTAGTAAAGGTAA          | 18079 |
| gb:LC522973 | Organism: Severe | ATGTGGCAACTTTACAAGCTGAAAATGTAACAGGACTCTTTAAAGATTGTAGTAAAGGTAA          | 18079 |
| gb:LC522974 | Organism: Severe | ATGTGGCAACTTTACAAGCTGAAAATGTAACAGGACTCTTTAAAGATTGTAGTAAAGGTAA          | 18079 |
| gb:MN985325 | Organism: Severe | ATGTGGCAACTTTACAAGCTGAAAATGTAACAGGACTCTTTAAAGATTGTAGTAAAGGTAA          | 18082 |
| gb:MT020881 | Organism: Severe | ATGTGGCAACTTTACAAGCTGAAAATGTAACAGGACTCTTTAAAGATTGTAGTAAAGGTAA          | 18082 |
| gb:MT020880 | Organism: Severe | ATGTGGCAACTTTACAAGCTGAAAATGTAACAGGACTCTTTAAAGATTGTAGTAAAGGTAA          | 18082 |
| gb:MT066175 | Organism: Severe | ATGTGGCAACTTTACAAGCTGAAAATGTAACAGGACTCTTTAAAGATTGTAGTAAAGGTAA          | 18082 |
| gb:MN997409 | Organism: Severe | ATGTGGCAACTTTACAAGCTGAAAATGTAACAGGACTCTTTAAAGATTGTAGTAAAGGTAA          | 18082 |
| gb:MN938384 | Organism: Severe | ATGTGGCAACTTTACAAGCTGAAAATGTAACAGGACTCTTTAAAGATTGTAGTAAAGGTAA          | 18050 |
| gb:MT044258 | Organism: Severe | ATGTGGCAACTTTACAAGCTGAAAATGTAACAGGACTCTTTAAAGATTGTAGTAAAGGTAA          | 18058 |
| gb:MT039890 | Organism: Severe | ATGTGGCAACTTTACAAGCTGAAAATGTAACAGGACTCTTTAAAGATTGTAGTAAAGGTAA          | 18082 |
| gb:MN988713 | Organism: Severe | ATGTGGCAACTTTACAAGCTGAAAATGTAACAGGACTCTTTAAAGATTGTAGTAAAGGTAA          | 18082 |
| gb:LC521925 | Organism: Severe | ATGTGGCAACTTTACAAGCTGAAAATGTAACAGGACTCTTTAAAGATTGTAGTAAAGGTAA          | 18055 |
| gb:MT093571 | Organism: Severe | ATGTGGCAACTTTACAAGCTGAAAATGTAACAGGACTCTTTAAAGATTGTAGTAAAGGTAA          | 18082 |
| gb:MT039887 | Organism: Severe | ATGTGGCAACTTTACAAGCTGAAAATGTAACAGGACTCTTTAAAGATTGTAGTAAAGGTAA          | 18082 |
| gb:MT019530 | Organism: Severe | ATGTGGCAACTTTACAAGCTGAAAATGTAACAGGACTCTTTAAAGATTGTAGTAAAGGTAA          | 18082 |
| gb:MT039888 | Organism: Severe | ATGTGGCAACTTTACAAGCTGAAAATGTAACAGGACTCTTTAAAGATTGTAGTAAAGGTAA          | 18082 |
| gb:LC522972 | Organism: Severe | ATGTGGCAACTTTACAAGCTGAAAATGTAACAGGACTCTTTAAAGATTGTAGTAAAGGTAA          | 18079 |
| gb:MT027063 | Organism: Severe | ATGTGGCAACTTTACAAGCTGAAAATGTAACAGGACTCTTTAAAGATTGTAGTAAAGGTAA          | 18082 |
| gb:MT027062 | Organism: Severe | ATGTGGCAACTTTACAAGCTGAAAATGTAACAGGACTCTTTAAAGATTGTAGTAAAGGTAA          | 18082 |
| gb:MT019529 | Organism: Severe | ATGTGGCAACTTTACAAGCTGAAAATGTAACAGGACTCTTTAAAGATTGTAGTAAAGGTAA          | 18082 |
| gb:MN996529 | Organism: Severe | ATGTGGCAACTTTACAAGCTGAAAATGTAACAGGACTCTTTAAAGATTGTAGTAAAGGTAA          | 18070 |
| gb:MN996531 | Organism: Severe | ATGTGGCAACTTTACAAGCTGAAAATGTAACAGGACTCTTTAAAGATTGTAGTAAAGGTAA          | 18069 |
| gb:MT066176 | Organism: Severe | ATGTGGCAACTTTACAAGCTGAAAATGTAACAGGACTCTTTAAAGATTGTAGTAAAGGTAA          | 18082 |
| gb:MT027064 | Organism: Severe | ATGTGGCAACTTTACAAGCTGAAAATGTAACAGGACTCTTTAAAGATTGTAGTAAAGGTAA          | 18082 |
| gb:MN994468 | Organism: Severe | ATGTGGCAACTTTACAAGCTGAAAATGTAACAGGACTCTTTAAAGATTGTAGTAAAGGTAA          | 18082 |
| gb:MT072688 | Organism: Severe | ATGTGGCAACTTTACAAGCTGAAAATGTAACAGGACTCTTTAAAGATTGTAGTAAAGGTAA          | 18067 |
| gb:MN996527 | Organism: Severe | ATGTGGCAACTTTACAAGCTGAAAATGTAACAGGACTCTTTAAAGATTGTAGTAAAGGTAA          | 18049 |
| gb:MT093631 | Organism: Severe | ATGTGGCAACTTTACAAGCTGAAAATGTAACAGGACTCTTTAAAGATTGTAGTAAAGGTAA          | 18120 |
| gb:MT106053 | Organism: Severe | ATGTGGCAACTTTACAAGCTGAAAATGTAACAGGACTCTTTAAAGATTGTAGTAAAGGTAA          | 18082 |
| gb:MT019533 | Organism: Severe | ATGTGGCAACTTTACAAGCTGAAAATGTAACAGGACTCTTTAAAGATTGTAGTAAAGGTAA          | 18082 |
| gb:MT019531 | Organism: Severe | ATGTGGCAACTTTACAAGCTGAAAATGTAACAGGACTCTTTAAAGATTGTAGTAAAGGTAA          | 18082 |
| gb:MN996528 | Organism: Severe | ATGTGGCAACTTTACAAGCTGAAAATGTAACAGGACTCTTTAAAGATTGTAGTAAAGGTAA          | 18082 |
| gb:MN996530 | Organism: Severe | ATGTGGCAACTTTACAAGCTGAAAATGTAACAGGACTCTTTAAAGATTGTAGTAAAGGTAA          | 18068 |
| gb:MN908947 | Organism: Severe | ATGTGGCAACTTTACAAGCTGAAAATGTAACAGGACTCTTTAAAGATTGTAGTAAAGGTAA          | 18082 |
| gb:MT019532 | Organism: Severe | ATGTGGCAACTTTACAAGCTGAAAATGTAACAGGACTCTTTAAAGATTGTAGTAAAGGTAA<br>***** | 18082 |

|             |                  |                                                              |       |
|-------------|------------------|--------------------------------------------------------------|-------|
| gb:MT020781 | Organism: Severe | TCACTGGGTTACATCCTACACAGGCACCTACACACCTCAGTGTTGACACTAAATTCAAAA | 18130 |
| gb:MT007544 | Organism: Severe | TCACTGGGTTACATCCTACACAGGCACCTACACACCTCAGTGTTGACACTAAATTCAAAA | 18142 |
| gb:MN994467 | Organism: Severe | TCACTGGGTTACATCCTACACAGGCACCTACACACCTCAGTGTTGACACTAAATTCAAAA | 18142 |
| gb:MT044257 | Organism: Severe | TCACTGGGTTACATCCTACACAGGCACCTACACACCTCAGTGTTGACACTAAATTCAAAA | 18142 |
| gb:MT106054 | Organism: Severe | TCACTGGGTTACATCCTACACAGGCACCTACACACCTCAGTGTTGACACTAAATTCAAAA | 18142 |
| gb:MT049951 | Organism: Severe | TCACTGGGTTACATCCTACACAGGCACCTACACACCTCAGTGTTGACACTAAATTCAAAA | 18142 |
| gb:MN975262 | Organism: Severe | TCACTGGGTTACATCCTACACAGGCACCTACACACCTCAGTGTTGACACTAAATTCAAAA | 18142 |
| gb:MT106052 | Organism: Severe | TCACTGGGTTACATCCTACACAGGCACCTACACACCTCAGTGTTGACACTAAATTCAAAA | 18142 |
| gb:LC522975 | Organism: Severe | TCACTGGGTTACATCCTACACAGGCACCTACACACCTCAGTGTTGACACTAAATTCAAAA | 18139 |
| gb:LC522973 | Organism: Severe | TCACTGGGTTACATCCTACACAGGCACCTACACACCTCAGTGTTGACACTAAATTCAAAA | 18139 |
| gb:LC522974 | Organism: Severe | TCACTGGGTTACATCCTACACAGGCACCTACACACCTCAGTGTTGACACTAAATTCAAAA | 18139 |
| gb:MN985325 | Organism: Severe | TCACTGGGTTACATCCTACACAGGCACCTACACACCTCAGTGTTGACACTAAATTCAAAA | 18142 |
| gb:MT020881 | Organism: Severe | TCACTGGGTTACATCCTACACAGGCACCTACACACCTCAGTGTTGACACTAAATTCAAAA | 18142 |
| gb:MT020880 | Organism: Severe | TCACTGGGTTACATCCTACACAGGCACCTACACACCTCAGTGTTGACACTAAATTCAAAA | 18142 |

|             |                 |                                                              |       |
|-------------|-----------------|--------------------------------------------------------------|-------|
| gb:MT066175 | Organism:Severe | TCACTGGGTTACATCCTACACAGGCACCTACACACCTCAGTGTTGACACTAAATTCAAAA | 18142 |
| gb:MN997409 | Organism:Severe | TCACTGGGTTACATCCTACACAGGCACCTACACACCTCAGTGTTGACACTAAATTCAAAA | 18142 |
| gb:MN938384 | Organism:Severe | TCACTGGGTTACATCCTACACAGGCACCTACACACCTCAGTGTTGACACTAAATTCAAAA | 18110 |
| gb:MT044258 | Organism:Severe | TCACTGGGTTACATCCTACACAGGCACCTACACACCTCAGTGTTGACACTAAATTCAAAA | 18118 |
| gb:MT039890 | Organism:Severe | TCACTGGGTTACATCCTACACAGGCACCTACACACCTCAGTGTTGACACTAAATTCAAAA | 18142 |
| gb:MN988713 | Organism:Severe | TCACTGGGTTACATCCTACACAGGCACCTACACACCTCAGTGTTGACACTAAATTCAAAA | 18142 |
| gb:LC521925 | Organism:Severe | TCACTGGGTTACATCCTACACAGGCACCTACACACCTCAGTGTTGACACTAAATTCAAAA | 18115 |
| gb:MT093571 | Organism:Severe | TCACTGGGTTACATCCTACACAGGCACCTACACACCTCAGTGTTGACACTAAATTCAAAA | 18142 |
| gb:MT039887 | Organism:Severe | TCACTGGGTTACATCCTACACAGGCACCTACACACCTCAGTGTTGACACTAAATTCAAAA | 18142 |
| gb:MT019530 | Organism:Severe | TCACTGGGTTACATCCTACACAGGCACCTACACACCTCAGTGTTGACACTAAATTCAAAA | 18142 |
| gb:MT039888 | Organism:Severe | TCACTGGGTTACATCCTACACAGGCACCTACACACCTCAGTGTTGACACTAAATTCAAAA | 18142 |
| gb:LC522972 | Organism:Severe | TCACTGGGTTACATCCTACACAGGCACCTACACACCTCAGTGTTGACACTAAATTCAAAA | 18139 |
| gb:MT027063 | Organism:Severe | TCACTGGGTTACATCCTACACAGGCACCTACACACCTCAGTGTTGACACTAAATTCAAAA | 18142 |
| gb:MT027062 | Organism:Severe | TCACTGGGTTACATCCTACACAGGCACCTACACACCTCAGTGTTGACACTAAATTCAAAA | 18142 |
| gb:MT019529 | Organism:Severe | TCACTGGGTTACATCCTACACAGGCACCTACACACCTCAGTGTTGACACTAAATTCAAAA | 18142 |
| gb:MN996529 | Organism:Severe | TCACTGGGTTACATCCTACACAGGCACCTACACACCTCAGTGTTGACACTAAATTCAAAA | 18130 |
| gb:MN996531 | Organism:Severe | TCACTGGGTTACATCCTACACAGGCACCTACACACCTCAGTGTTGACACTAAATTCAAAA | 18129 |
| gb:MT066176 | Organism:Severe | TCACTGGGTTACATCCTACACAGGCACCTACACACCTCAGTGTTGACACTAAATTCAAAA | 18142 |
| gb:MT027064 | Organism:Severe | TCACTGGGTTACATCCTACACAGGCACCTACACACCTCAGTGTTGACACTAAATTCAAAA | 18142 |
| gb:MN994468 | Organism:Severe | TCACTGGGTTACATCCTACACAGGCACCTACACACCTCAGTGTTGACACTAAATTCAAAA | 18142 |
| gb:MT072688 | Organism:Severe | TCACTGGGTTACATCCTACACAGGCACCTACACACCTCAGTGTTGACACTAAATTCAAAA | 18127 |
| gb:MN996527 | Organism:Severe | TCACTGGGTTACATCCTACACAGGCACCTACACACCTCAGTGTTGACACTAAATTCAAAA | 18109 |
| gb:MT093631 | Organism:Severe | TCACTGGGTTACATCCTACACAGGCACCTACACACCTCAGTGTTGACACTAAATTCAAAA | 18180 |
| gb:MT106053 | Organism:Severe | TCACTGGGTTACATCCTACACAGGCACCTACACACCTCAGTGTTGACACTAAATTCAAAA | 18142 |
| gb:MT019533 | Organism:Severe | TCACTGGGTTACATCCTACACAGGCACCTACACACCTCAGTGTTGACACTAAATTCAAAA | 18142 |
| gb:MT019531 | Organism:Severe | TCACTGGGTTACATCCTACACAGGCACCTACACACCTCAGTGTTGACACTAAATTCAAAA | 18142 |
| gb:MN996528 | Organism:Severe | TCACTGGGTTACATCCTACACAGGCACCTACACACCTCAGTGTTGACACTAAATTCAAAA | 18142 |
| gb:MN996530 | Organism:Severe | TCACTGGGTTACATCCTACACAGGCACCTACACACCTCAGTGTTGACACTAAATTCAAAA | 18128 |
| gb:MN908947 | Organism:Severe | TCACTGGGTTACATCCTACACAGGCACCTACACACCTCAGTGTTGACACTAAATTCAAAA | 18142 |
| gb:MT019532 | Organism:Severe | TCACTGGGTTACATCCTACACAGGCACCTACACACCTCAGTGTTGACACTAAATTCAAAA | 18142 |

\*\*\*\*\*

|             |                 |                                                             |       |
|-------------|-----------------|-------------------------------------------------------------|-------|
| gb:MT020781 | Organism:Severe | CTGAAGGTTTATGTGTTGACATACCTGGCATACTAAGGACATGACCTATAGAAGACTCA | 18190 |
| gb:MT007544 | Organism:Severe | CTGAAGGTTTATGTGTTGACATACCTGGCATACTAAGGACATGACCTATAGAAGACTCA | 18202 |
| gb:MN994467 | Organism:Severe | CTGAAGGTTTATGTGTTGACATACCTGGCATACTAAGGACATGACCTATAGAAGACTCA | 18202 |
| gb:MT044257 | Organism:Severe | CTGAAGGTTTATGTGTTGACATACCTGGCATACTAAGGACATGACCTATAGAAGACTCA | 18202 |
| gb:MT106054 | Organism:Severe | CTGAAGGTTTATGTGTTGACATACCTGGCATACTAAGGACATGACCTATAGAAGACTCA | 18202 |
| gb:MT049951 | Organism:Severe | CTGAAGGTTTATGTGTTGACATACCTGGCATACTAAGGACATGACCTATAGAAGACTCA | 18202 |
| gb:MN975262 | Organism:Severe | CTGAAGGTTTATGTGTTGACATACCTGGCATACTAAGGACATGACCTATAGAAGACTCA | 18202 |
| gb:MT106052 | Organism:Severe | CTGAAGGTTTATGTGTTGACATACCTGGCATACTAAGGACATGACCTATAGAAGACTCA | 18202 |
| gb:LC522975 | Organism:Severe | CTGAAGGTTTATGTGTTGACATACCTGGCATACTAAGGACATGACCTATAGAAGACTCA | 18199 |
| gb:LC522973 | Organism:Severe | CTGAAGGTTTATGTGTTGACATACCTGGCATACTAAGGACATGACCTATAGAAGACTCA | 18199 |
| gb:LC522974 | Organism:Severe | CTGAAGGTTTATGTGTTGACATACCTGGCATACTAAGGACATGACCTATAGAAGACTCA | 18199 |
| gb:MN985325 | Organism:Severe | CTGAAGGTTTATGTGTTGACATACCTGGCATACTAAGGACATGACCTATAGAAGACTCA | 18202 |
| gb:MT020881 | Organism:Severe | CTGAAGGTTTATGTGTTGACATACCTGGCATACTAAGGACATGACCTATAGAAGACTCA | 18202 |
| gb:MT020880 | Organism:Severe | CTGAAGGTTTATGTGTTGACATACCTGGCATACTAAGGACATGACCTATAGAAGACTCA | 18202 |
| gb:MT066175 | Organism:Severe | CTGAAGGTTTATGTGTTGACATACCTGGCATACTAAGGACATGACCTATAGAAGACTCA | 18202 |
| gb:MN997409 | Organism:Severe | CTGAAGGTTTATGTGTTGACATACCTGGCATACTAAGGACATGACCTATAGAAGACTCA | 18202 |
| gb:MN938384 | Organism:Severe | CTGAAGGTTTATGTGTTGACATACCTGGCATACTAAGGACATGACCTATAGAAGACTCA | 18170 |
| gb:MT044258 | Organism:Severe | CTGAAGGTTTATGTGTTGACATACCTGGCATACTAAGGACATGACCTATAGAAGACTCA | 18178 |
| gb:MT039890 | Organism:Severe | CTGAAGGTTTATGTGTTGACATACCTGGCATACTAAGGACATGACCTATAGAAGACTCA | 18202 |
| gb:MN988713 | Organism:Severe | CTGAAGGTTTATGTGTTGACATACCTGGCATACTAAGGACATGACCTATAGAAGACTCA | 18202 |
| gb:LC521925 | Organism:Severe | CTGAAGGTTTATGTGTTGACATACCTGGCATACTAAGGACATGACCTATAGAAGACTCA | 18175 |
| gb:MT093571 | Organism:Severe | CTGAAGGTTTATGTGTTGACATACCTGGCATACTAAGGACATGACCTATAGAAGACTCA | 18202 |
| gb:MT039887 | Organism:Severe | CTGAAGGTTTATGTGTTGACATACCTGGCATACTAAGGACATGACCTATAGAAGACTCA | 18202 |
| gb:MT019530 | Organism:Severe | CTGAAGGTTTATGTGTTGACATACCTGGCATACTAAGGACATGACCTATAGAAGACTCA | 18202 |
| gb:MT039888 | Organism:Severe | CTGAAGGTTTATGTGTTGACATACCTGGCATACTAAGGACATGACCTATAGAAGACTCA | 18202 |
| gb:LC522972 | Organism:Severe | CTGAAGGTTTATGTGTTGACATACCTGGCATACTAAGGACATGACCTATAGAAGACTCA | 18199 |
| gb:MT027063 | Organism:Severe | CTGAAGGTTTATGTGTTGACATACCTGGCATACTAAGGACATGACCTATAGAAGACTCA | 18202 |
| gb:MT027062 | Organism:Severe | CTGAAGGTTTATGTGTTGACATACCTGGCATACTAAGGACATGACCTATAGAAGACTCA | 18202 |
| gb:MT019529 | Organism:Severe | CTGAAGGTTTATGTGTTGACATACCTGGCATACTAAGGACATGACCTATAGAAGACTCA | 18202 |
| gb:MN996529 | Organism:Severe | CTGAAGGTTTATGTGTTGACATACCTGGCATACTAAGGACATGACCTATAGAAGACTCA | 18190 |
| gb:MN996531 | Organism:Severe | CTGAAGGTTTATGTGTTGACATACCTGGCATACTAAGGACATGACCTATAGAAGACTCA | 18189 |
| gb:MT066176 | Organism:Severe | CTGAAGGTTTATGTGTTGACATACCTGGCATACTAAGGACATGACCTATAGAAGACTCA | 18202 |
| gb:MT027064 | Organism:Severe | CTGAAGGTTTATGTGTTGACATACCTGGCATACTAAGGACATGACCTATAGAAGACTCA | 18202 |



|             |                 |                                                             |       |
|-------------|-----------------|-------------------------------------------------------------|-------|
| gb:MN994468 | Organism:Severe | CTGAAGGTTTATGTGTTGACATACCTGGCATACTAAGGACATGACCTATAGAAGACTCA | 18202 |
| gb:MT072688 | Organism:Severe | CTGAAGGTTTATGTGTTGACATACCTGGCATACTAAGGACATGACCTATAGAAGACTCA | 18187 |
| gb:MN996527 | Organism:Severe | CTGAAGGTTTATGTGTTGACATACCTGGCATACTAAGGACATGACCTATAGAAGACTCA | 18169 |
| gb:MT093631 | Organism:Severe | CTGAAGGTTTATGTGTTGACATACCTGGCATACTAAGGACATGACCTATAGAAGACTCA | 18240 |
| gb:MT106053 | Organism:Severe | CTGAAGGTTTATGTGTTGACATACCTGGCATACTAAGGACATGACCTATAGAAGACTCA | 18202 |
| gb:MT019533 | Organism:Severe | CTGAAGGTTTATGTGTTGACATACCTGGCATACTAAGGACATGACCTATAGAAGACTCA | 18202 |
| gb:MT019531 | Organism:Severe | CTGAAGGTTTATGTGTTGACATACCTGGCATACTAAGGACATGACCTATAGAAGACTCA | 18202 |
| gb:MN996528 | Organism:Severe | CTGAAGGTTTATGTGTTGACATACCTGGCATACTAAGGACATGACCTATAGAAGACTCA | 18202 |
| gb:MN996530 | Organism:Severe | CTGAAGGTTTATGTGTTGACATACCTGGCATACTAAGGACATGACCTATAGAAGACTCA | 18188 |
| gb:MN908947 | Organism:Severe | CTGAAGGTTTATGTGTTGACATACCTGGCATACTAAGGACATGACCTATAGAAGACTCA | 18202 |
| gb:MT019532 | Organism:Severe | CTGAAGGTTTATGTGTTGACATACCTGGCATACTAAGGACATGACCTATAGAAGACTCA | 18202 |

\*\*\*\*\*

|             |                 |                                                             |       |
|-------------|-----------------|-------------------------------------------------------------|-------|
| gb:MT020781 | Organism:Severe | TCTCTATGATGGGTTTTAAATGAATTATCAAGTTAATGGTTACCCTAACATGTTTATCA | 18250 |
| gb:MT007544 | Organism:Severe | TCTCTATGATGGGTTTTAAATGAATTATCAAGTTAATGGTTACCCTAACATGTTTATCA | 18262 |
| gb:MN994467 | Organism:Severe | TCTCTATGATGGGTTTTAAATGAATTATCAAGTTAATGGTTACCCTAACATGTTTATCA | 18262 |
| gb:MT044257 | Organism:Severe | TCTCTATGATGGGTTTTAAATGAATTATCAAGTTAATGGTTACCCTAACATGTTTATCA | 18262 |
| gb:MT106054 | Organism:Severe | TCTCTATGATGGGTTTTAAATGAATTATCAAGTTAATGGTTACCCTAACATGTTTATCA | 18262 |
| gb:MT049951 | Organism:Severe | TCTCTATGATGGGTTTTAAATGAATTATCAAGTTAATGGTTACCCTAACATGTTTATCA | 18262 |
| gb:MN975262 | Organism:Severe | TCTCTATGATGGGTTTTAAATGAATTATCAAGTTAATGGTTACCCTAACATGTTTATCA | 18262 |
| gb:MT106052 | Organism:Severe | TCTCTATGATGGGTTTTAAATGAATTATCAAGTTAATGGTTACCCTAACATGTTTATCA | 18262 |
| gb:LC522975 | Organism:Severe | TCTCTATGATGGGTTTTAAATGAATTATCAAGTTAATGGTTACCCTAACATGTTTATCA | 18259 |
| gb:LC522973 | Organism:Severe | TCTCTATGATGGGTTTTAAATGAATTATCAAGTTAATGGTTACCCTAACATGTTTATCA | 18259 |
| gb:LC522974 | Organism:Severe | TCTCTATGATGGGTTTTAAATGAATTATCAAGTTAATGGTTACCCTAACATGTTTATCA | 18259 |
| gb:MN985325 | Organism:Severe | TCTCTATGATGGGTTTTAAATGAATTATCAAGTTAATGGTTACCCTAACATGTTTATCA | 18262 |
| gb:MT020881 | Organism:Severe | TCTCTATGATGGGTTTTAAATGAATTATCAAGTTAATGGTTACCCTAACATGTTTATCA | 18262 |
| gb:MT020880 | Organism:Severe | TCTCTATGATGGGTTTTAAATGAATTATCAAGTTAATGGTTACCCTAACATGTTTATCA | 18262 |
| gb:MT066175 | Organism:Severe | TCTCTATGATGGGTTTTAAATGAATTATCAAGTTAATGGTTACCCTAACATGTTTATCA | 18262 |
| gb:MN997409 | Organism:Severe | TCTCTATGATGGGTTTTAAATGAATTATCAAGTTAATGGTTACCCTAACATGTTTATCA | 18262 |
| gb:MN938384 | Organism:Severe | TCTCTATGATGGGTTTTAAATGAATTATCAAGTTAATGGTTACCCTAACATGTTTATCA | 18230 |
| gb:MT044258 | Organism:Severe | TCTCTATGATGGGTTTTAAATGAATTATCAAGTTAATGGTTACCCTAACATGTTTATCA | 18238 |
| gb:MT039890 | Organism:Severe | TCTCTATGATGGGTTTTAAATGAATTATCAAGTTAATGGTTACCCTAACATGTTTATCA | 18262 |
| gb:MN988713 | Organism:Severe | TCTCTATGATGGGTTTTAAATGAATTATCAAGTTAATGGTTACCCTAACATGTTTATCA | 18262 |
| gb:LC521925 | Organism:Severe | TCTCTATGATGGGTTTTAAATGAATTATCAAGTTAATGGTTACCCTAACATGTTTATCA | 18235 |
| gb:MT093571 | Organism:Severe | TCTCTATGATGGGTTTTAAATGAATTATCAAGTTAATGGTTACCCTAACATGTTTATCA | 18262 |
| gb:MT039887 | Organism:Severe | TCTCTATGATGGGTTTTAAATGAATTATCAAGTTAATGGTTACCCTAACATGTTTATCA | 18262 |
| gb:MT019530 | Organism:Severe | TCTCTATGATGGGTTTTAAATGAATTATCAAGTTAATGGTTACCCTAACATGTTTATCA | 18262 |
| gb:MT039888 | Organism:Severe | TCTCTATGATGGGTTTTAAATGAATTATCAAGTTAATGGTTACCCTAACATGTTTATCA | 18262 |
| gb:LC522972 | Organism:Severe | TCTCTATGATGGGTTTTAAATGAATTATCAAGTTAATGGTTACCCTAACATGTTTATCA | 18259 |
| gb:MT027063 | Organism:Severe | TCTCTATGATGGGTTTTAAATGAATTATCAAGTTAATGGTTACCCTAACATGTTTATCA | 18262 |
| gb:MT027062 | Organism:Severe | TCTCTATGATGGGTTTTAAATGAATTATCAAGTTAATGGTTACCCTAACATGTTTATCA | 18262 |
| gb:MT019529 | Organism:Severe | TCTCTATGATGGGTTTTAAATGAATTATCAAGTTAATGGTTACCCTAACATGTTTATCA | 18262 |
| gb:MN996529 | Organism:Severe | TCTCTATGATGGGTTTTAAATGAATTATCAAGTTAATGGTTACCCTAACATGTTTATCA | 18250 |
| gb:MN996531 | Organism:Severe | TCTCTATGATGGGTTTTAAATGAATTATCAAGTTAATGGTTACCCTAACATGTTTATCA | 18249 |
| gb:MT066176 | Organism:Severe | TCTCTATGATGGGTTTTAAATGAATTATCAAGTTAATGGTTACCCTAACATGTTTATCA | 18262 |
| gb:MT027064 | Organism:Severe | TCTCTATGATGGGTTTTAAATGAATTATCAAGTTAATGGTTACCCTAACATGTTTATCA | 18262 |
| gb:MN994468 | Organism:Severe | TCTCTATGATGGGTTTTAAATGAATTATCAAGTTAATGGTTACCCTAACATGTTTATCA | 18262 |
| gb:MT072688 | Organism:Severe | TCTCTATGATGGGTTTTAAATGAATTATCAAGTTAATGGTTACCCTAACATGTTTATCA | 18247 |
| gb:MN996527 | Organism:Severe | TCTCTATGATGGGTTTTAAATGAATTATCAAGTTAATGGTTACCCTAACATGTTTATCA | 18229 |
| gb:MT093631 | Organism:Severe | TCTCTATGATGGGTTTTAAATGAATTATCAAGTTAATGGTTACCCTAACATGTTTATCA | 18300 |
| gb:MT106053 | Organism:Severe | TCTCTATGATGGGTTTTAAATGAATTATCAAGTTAATGGTTACCCTAACATGTTTATCA | 18262 |
| gb:MT019533 | Organism:Severe | TCTCTATGATGGGTTTTAAATGAATTATCAAGTTAATGGTTACCCTAACATGTTTATCA | 18262 |
| gb:MT019531 | Organism:Severe | TCTCTATGATGGGTTTTAAATGAATTATCAAGTTAATGGTTACCCTAACATGTTTATCA | 18262 |
| gb:MN996528 | Organism:Severe | TCTCTATGATGGGTTTTAAATGAATTATCAAGTTAATGGTTACCCTAACATGTTTATCA | 18262 |
| gb:MN996530 | Organism:Severe | TCTCTATGATGGGTTTTAAATGAATTATCAAGTTAATGGTTACCCTAACATGTTTATCA | 18248 |
| gb:MN908947 | Organism:Severe | TCTCTATGATGGGTTTTAAATGAATTATCAAGTTAATGGTTACCCTAACATGTTTATCA | 18262 |
| gb:MT019532 | Organism:Severe | TCTCTATGATGGGTTTTAAATGAATTATCAAGTTAATGGTTACCCTAACATGTTTATCA | 18262 |

\*\*\*\*\*

|             |                 |                                                              |       |
|-------------|-----------------|--------------------------------------------------------------|-------|
| gb:MT020781 | Organism:Severe | CCC CGAAGAAGCTATAAGACATGTACGTGCATGGATTGGCTTCGATGTCGAGGGGTGTC | 18310 |
| gb:MT007544 | Organism:Severe | CCC CGAAGAAGCTATAAGACATGTACGTGCATGGATTGGCTTCGATGTCGAGGGGTGTC | 18322 |
| gb:MN994467 | Organism:Severe | CCC CGAAGAAGCTATAAGACATGTACGTGCATGGATTGGCTTCGATGTCGAGGGGTGTC | 18322 |
| gb:MT044257 | Organism:Severe | CCC CGAAGAAGCTATAAGACATGTACGTGCATGGATTGGCTTCGATGTCGAGGGGTGTC | 18322 |
| gb:MT106054 | Organism:Severe | CCC CGAAGAAGCTATAAGACATGTACGTGCATGGATTGGCTTCGATGTCGAGGGGTGTC | 18322 |
| gb:MT049951 | Organism:Severe | CCC CGAAGAAGCTATAAGACATGTACGTGCATGGATTGGCTTCGATGTCGAGGGGTGTC | 18322 |

|             |                 |     |                                                          |       |
|-------------|-----------------|-----|----------------------------------------------------------|-------|
| gb:MN975262 | Organism:Severe | CCC | CGAAGAAGCTATAAGACATGTACGTGCATGGATTGGCTTCGATGTCGAGGGGTGTC | 18322 |
| gb:MT106052 | Organism:Severe | CCC | CGAAGAAGCTATAAGACATGTACGTGCATGGATTGGCTTCGATGTCGAGGGGTGTC | 18322 |
| gb:LC522975 | Organism:Severe | CCC | CGAAGAAGCTATAAGACATGTACGTGCATGGATTGGCTTCGATGTCGAGGGGTGTC | 18319 |
| gb:LC522973 | Organism:Severe | CCC | CGAAGAAGCTATAAGACATGTACGTGCATGGATTGGCTTCGATGTCGAGGGGTGTC | 18319 |
| gb:LC522974 | Organism:Severe | CCC | CGAAGAAGCTATAAGACATGTACGTGCATGGATTGGCTTCGATGTCGAGGGGTGTC | 18319 |
| gb:MN985325 | Organism:Severe | CCC | CGAAGAAGCTATAAGACATGTACGTGCATGGATTGGCTTCGATGTCGAGGGGTGTC | 18322 |
| gb:MT020881 | Organism:Severe | CCC | CGAAGAAGCTATAAGACATGTACGTGCATGGATTGGCTTCGATGTCGAGGGGTGTC | 18322 |
| gb:MT020880 | Organism:Severe | CCC | CGAAGAAGCTATAAGACATGTACGTGCATGGATTGGCTTCGATGTCGAGGGGTGTC | 18322 |
| gb:MT066175 | Organism:Severe | CCC | CGAAGAAGCTATAAGACATGTACGTGCATGGATTGGCTTCGATGTCGAGGGGTGTC | 18322 |
| gb:MN997409 | Organism:Severe | CCC | CGAAGAAGCTATAAGACATGTACGTGCATGGATTGGCTTCGATGTCGAGGGGTGTC | 18322 |
| gb:MN938384 | Organism:Severe | CCC | CGAAGAAGCTATAAGACATGTACGTGCATGGATTGGCTTCGATGTCGAGGGGTGTC | 18290 |
| gb:MT044258 | Organism:Severe | CCC | CGAAGAAGCTATAAGACATGTACGTGCATGGATTGGCTTCGATGTCGAGGGGTGTC | 18298 |
| gb:MT039890 | Organism:Severe | CCC | CGAAGAAGCTATAAGACATGTACGTGCATGGATTGGCTTCGATGTCGAGGGGTGTC | 18322 |
| gb:MN988713 | Organism:Severe | CCC | CGAAGAAGCTATAAGACATGTACGTGCATGGATTGGCTTCGATGTCGAGGGGTGTC | 18322 |
| gb:LC521925 | Organism:Severe | CCC | CGAAGAAGCTATAAGACATGTACGTGCATGGATTGGCTTCGATGTCGAGGGGTGTC | 18295 |
| gb:MT093571 | Organism:Severe | CCC | CGAAGAAGCTATAAGACATGTACGTGCATGGATTGGCTTCGATGTCGAGGGGTGTC | 18322 |
| gb:MT039887 | Organism:Severe | CCC | CGAAGAAGCTATAAGACATGTACGTGCATGGATTGGCTTCGATGTCGAGGGGTGTC | 18322 |
| gb:MT019530 | Organism:Severe | CCC | CGAAGAAGCTATAAGACATGTACGTGCATGGATTGGCTTCGATGTCGAGGGGTGTC | 18322 |
| gb:MT039888 | Organism:Severe | CCC | CGAAGAAGCTATAAGACATGTACGTGCATGGATTGGCTTCGATGTCGAGGGGTGTC | 18322 |
| gb:LC522972 | Organism:Severe | CCC | CGAAGAAGCTATAAGACATGTACGTGCATGGATTGGCTTCGATGTCGAGGGGTGTC | 18319 |
| gb:MT027063 | Organism:Severe | CCC | CGAAGAAGCTATAAGACATGTACGTGCATGGATTGGCTTCGATGTCGAGGGGTGTC | 18322 |
| gb:MT027062 | Organism:Severe | CCC | CGAAGAAGCTATAAGACATGTACGTGCATGGATTGGCTTCGATGTCGAGGGGTGTC | 18322 |
| gb:MT019529 | Organism:Severe | CCC | CGAAGAAGCTATAAGACATGTACGTGCATGGATTGGCTTCGATGTCGAGGGGTGTC | 18322 |
| gb:MN996529 | Organism:Severe | CCC | CGAAGAAGCTATAAGACATGTACGTGCATGGATTGGCTTCGATGTCGAGGGGTGTC | 18310 |
| gb:MN996531 | Organism:Severe | CCC | CGAAGAAGCTATAAGACATGTACGTGCATGGATTGGCTTCGATGTCGAGGGGTGTC | 18309 |
| gb:MT066176 | Organism:Severe | CCC | CGAAGAAGCTATAAGACATGTACGTGCATGGATTGGCTTCGATGTCGAGGGGTGTC | 18322 |
| gb:MT027064 | Organism:Severe | CCC | CGAAGAAGCTATAAGACATGTACGTGCATGGATTGGCTTCGATGTCGAGGGGTGTC | 18322 |
| gb:MN994468 | Organism:Severe | CCC | CGAAGAAGCTATAAGACATGTACGTGCATGGATTGGCTTCGATGTCGAGGGGTGTC | 18322 |
| gb:MT072688 | Organism:Severe | CCC | CGAAGAAGCTATAAGACATGTACGTGCATGGATTGGCTTCGATGTCGAGGGGTGTC | 18307 |
| gb:MN996527 | Organism:Severe | CCC | CGAAGAAGCTATAAGACATGTACGTGCATGGATTGGCTTCGATGTCGAGGGGTGTC | 18289 |
| gb:MT093631 | Organism:Severe | CCC | CGAAGAAGCTATAAGACATGTACGTGCATGGATTGGCTTCGATGTCGAGGGGTGTC | 18360 |
| gb:MT106053 | Organism:Severe | CCC | CGAAGAAGCTATAAGACATGTACGTGCATGGATTGGCTTCGATGTCGAGGGGTGTC | 18322 |
| gb:MT019533 | Organism:Severe | CCC | CGAAGAAGCTATAAGACATGTACGTGCATGGATTGGCTTCGATGTCGAGGGGTGTC | 18322 |
| gb:MT019531 | Organism:Severe | CCC | CGAAGAAGCTATAAGACATGTACGTGCATGGATTGGCTTCGATGTCGAGGGGTGTC | 18322 |
| gb:MN996528 | Organism:Severe | CCC | CGAAGAAGCTATAAGACATGTACGTGCATGGATTGGCTTCGATGTCGAGGGGTGTC | 18322 |
| gb:MN996530 | Organism:Severe | CCC | CGAAGAAGCTATAAGACATGTACGTGCATGGATTGGCTTCGATGTCGAGGGGTGTC | 18308 |
| gb:MN908947 | Organism:Severe | CCC | CGAAGAAGCTATAAGACATGTACGTGCATGGATTGGCTTCGATGTCGAGGGGTGTC | 18322 |
| gb:MT019532 | Organism:Severe | CCC | CGAAGAAGCTATAAGACATGTACGTGCATGGATTGGCTTCGATGTCGAGGGGTGTC | 18322 |

\*\*\*\*\*

|             |                 |     |                                                           |       |
|-------------|-----------------|-----|-----------------------------------------------------------|-------|
| gb:MT020781 | Organism:Severe | ATG | CTACTAGAGAAGCTGTTGGTACCAATTTACCTTTACAGCTAGGTTTTTCTACAGGTG | 18370 |
| gb:MT007544 | Organism:Severe | ATG | CTACTAGAGAAGCTGTTGGTACCAATTTACCTTTACAGCTAGGTTTTTCTACAGGTG | 18382 |
| gb:MN994467 | Organism:Severe | ATG | CTACTAGAGAAGCTGTTGGTACCAATTTACCTTTACAGCTAGGTTTTTCTACAGGTG | 18382 |
| gb:MT044257 | Organism:Severe | ATG | CTACTAGAGAAGCTGTTGGTACCAATTTACCTTTACAGCTAGGTTTTTCTACAGGTG | 18382 |
| gb:MT106054 | Organism:Severe | ATG | CTACTAGAGAAGCTGTTGGTACCAATTTACCTTTACAGCTAGGTTTTTCTACAGGTG | 18382 |
| gb:MT049951 | Organism:Severe | ATG | CTACTAGAGAAGCTGTTGGTACCAATTTACCTTTACAGCTAGGTTTTTCTACAGGTG | 18382 |
| gb:MN975262 | Organism:Severe | ATG | CTACTAGAGAAGCTGTTGGTACCAATTTACCTTTACAGCTAGGTTTTTCTACAGGTG | 18382 |
| gb:MT106052 | Organism:Severe | ATG | CTACTAGAGAAGCTGTTGGTACCAATTTACCTTTACAGCTAGGTTTTTCTACAGGTG | 18382 |
| gb:LC522975 | Organism:Severe | ATG | CTACTAGAGAAGCTGTTGGTACCAATTTACCTTTACAGCTAGGTTTTTCTACAGGTG | 18379 |
| gb:LC522973 | Organism:Severe | ATG | CTACTAGAGAAGCTGTTGGTACCAATTTACCTTTACAGCTAGGTTTTTCTACAGGTG | 18379 |
| gb:LC522974 | Organism:Severe | ATG | CTACTAGAGAAGCTGTTGGTACCAATTTACCTTTACAGCTAGGTTTTTCTACAGGTG | 18379 |
| gb:MN985325 | Organism:Severe | ATG | CTACTAGAGAAGCTGTTGGTACCAATTTACCTTTACAGCTAGGTTTTTCTACAGGTG | 18382 |
| gb:MT020881 | Organism:Severe | ATG | CTACTAGAGAAGCTGTTGGTACCAATTTACCTTTACAGCTAGGTTTTTCTACAGGTG | 18382 |
| gb:MT020880 | Organism:Severe | ATG | CTACTAGAGAAGCTGTTGGTACCAATTTACCTTTACAGCTAGGTTTTTCTACAGGTG | 18382 |
| gb:MT066175 | Organism:Severe | ATG | CTACTAGAGAAGCTGTTGGTACCAATTTACCTTTACAGCTAGGTTTTTCTACAGGTG | 18382 |
| gb:MN997409 | Organism:Severe | ATG | CTACTAGAGAAGCTGTTGGTACCAATTTACCTTTACAGCTAGGTTTTTCTACAGGTG | 18382 |
| gb:MN938384 | Organism:Severe | ATG | CTACTAGAGAAGCTGTTGGTACCAATTTACCTTTACAGCTAGGTTTTTCTACAGGTG | 18350 |
| gb:MT044258 | Organism:Severe | ATG | CTACTAGAGAAGCTGTTGGTACCAATTTACCTTTACAGCTAGGTTTTTCTACAGGTG | 18358 |
| gb:MT039890 | Organism:Severe | ATG | CTACTAGAGAAGCTGTTGGTACCAATTTACCTTTACAGCTAGGTTTTTCTACAGGTG | 18382 |
| gb:MN988713 | Organism:Severe | ATG | CTACTAGAGAAGCTGTTGGTACCAATTTACCTTTACAGCTAGGTTTTTCTACAGGTG | 18382 |
| gb:LC521925 | Organism:Severe | ATG | CTACTAGAGAAGCTGTTGGTACCAATTTACCTTTACAGCTAGGTTTTTCTACAGGTG | 18355 |
| gb:MT093571 | Organism:Severe | ATG | CTACTAGAGAAGCTGTTGGTACCAATTTACCTTTACAGCTAGGTTTTTCTACAGGTG | 18382 |
| gb:MT039887 | Organism:Severe | ATG | CTACTAGAGAAGCTGTTGGTACCAATTTACCTTTACAGCTAGGTTTTTCTACAGGTG | 18382 |
| gb:MT019530 | Organism:Severe | ATG | CTACTAGAGAAGCTGTTGGTACCAATTTACCTTTACAGCTAGGTTTTTCTACAGGTG | 18382 |
| gb:MT039888 | Organism:Severe | ATG | CTACTAGAGAAGCTGTTGGTACCAATTTACCTTTACAGCTAGGTTTTTCTACAGGTG | 18382 |



\*\*\*\*\*

|             |                  |                                                               |       |
|-------------|------------------|---------------------------------------------------------------|-------|
| gb:MT020781 | Organism: Severe | GAGTTAGTGCTAAACCACCGCCTGGAGATCAATTTAAACACCTCATACCACCTTATGTACA | 18490 |
| gb:MT007544 | Organism: Severe | GAGTTAGTGCTAAACCACCGCCTGGAGATCAATTTAAACACCTCATACCACCTTATGTACA | 18502 |
| gb:MN994467 | Organism: Severe | GAGTTAGTGCTAAACCACCGCCTGGAGATCAATTTAAACACCTCATACCACCTTATGTACA | 18502 |
| gb:MT044257 | Organism: Severe | GAGTTAGTGCTAAACCACCGCCTGGAGATCAATTTAAACACCTCATACCACCTTATGTACA | 18502 |
| gb:MT106054 | Organism: Severe | GAGTTAGTGCTAAACCACCGCCTGGAGATCAATTTAAACACCTCATACCACCTTATGTACA | 18502 |
| gb:MT049951 | Organism: Severe | GAGTTAGTGCTAAACCACCGCCTGGAGATCAATTTAAACACCTCATACCACCTTATGTACA | 18502 |
| gb:MN975262 | Organism: Severe | GAGTTAGTGCTAAACCACCGCCTGGAGATCAATTTAAACACCTCATACCACCTTATGTACA | 18502 |
| gb:MT106052 | Organism: Severe | GAGTTAGTGCTAAACCACCGCCTGGAGATCAATTTAAACACCTCATACCACCTTATGTACA | 18502 |
| gb:LC522975 | Organism: Severe | GAGTTAGTGCTAAACCACCGCCTGGAGATCAATTTAAACACCTCATACCACCTTATGTACA | 18499 |
| gb:LC522973 | Organism: Severe | GAGTTAGTGCTAAACCACCGCCTGGAGATCAATTTAAACACCTCATACCACCTTATGTACA | 18499 |
| gb:LC522974 | Organism: Severe | GAGTTAGTGCTAAACCACCGCCTGGAGATCAATTTAAACACCTCATACCACCTTATGTACA | 18499 |
| gb:MN985325 | Organism: Severe | GAGTTAGTGCTAAACCACCGCCTGGAGATCAATTTAAACACCTCATACCACCTTATGTACA | 18502 |
| gb:MT020881 | Organism: Severe | GAGTTAGTGCTAAACCACCGCCTGGAGATCAATTTAAACACCTCATACCACCTTATGTACA | 18502 |
| gb:MT020880 | Organism: Severe | GAGTTAGTGCTAAACCACCGCCTGGAGATCAATTTAAACACCTCATACCACCTTATGTACA | 18502 |
| gb:MT066175 | Organism: Severe | GAGTTAGTGCTAAACCACCGCCTGGAGATCAATTTAAACACCTCATACCACCTTATGTACA | 18502 |
| gb:MN997409 | Organism: Severe | GAGTTAGTGCTAAACCACCGCCTGGAGATCAATTTAAACACCTCATACCACCTTATGTACA | 18502 |
| gb:MN938384 | Organism: Severe | GAGTTAGTGCTAAACCACCGCCTGGAGATCAATTTAAACACCTCATACCACCTTATGTACA | 18470 |
| gb:MT044258 | Organism: Severe | GAGTTAGTGCTAAACCACCGCCTGGAGATCAATTTAAACACCTCATACCACCTTATGTACA | 18478 |
| gb:MT039890 | Organism: Severe | GAGTTAGTGCTAAACCACCGCCTGGAGATCAATTTAAACACCTCATACCACCTTATGTACA | 18502 |
| gb:MN988713 | Organism: Severe | GAGTTAGTGCTAAACCACCGCCTGGAGATCAATTTAAACACCTCATACCACCTTATGTACA | 18502 |
| gb:LC521925 | Organism: Severe | GAGTTAGTGCTAAACCACCGCCTGGAGATCAATTTAAACACCTCATACCACCTTATGTACA | 18475 |
| gb:MT093571 | Organism: Severe | GAGTTAGTGCTAAACCACCGCCTGGAGATCAATTTAAACACCTCATACCACCTTATGTACA | 18502 |
| gb:MT039887 | Organism: Severe | GAGTTAGTGCTAAACCACCGCCTGGAGATCAATTTAAACACCTCATACCACCTTATGTACA | 18502 |
| gb:MT019530 | Organism: Severe | GAGTTAGTGCTAAACCACCGCCTGGAGATCAATTTAAACACCTCATACCACCTTATGTACA | 18502 |
| gb:MT039888 | Organism: Severe | GAGTTAGTGCTAAACCACCGCCTGGAGATCAATTTAAACACCTCATACCACCTTATGTACA | 18502 |
| gb:LC522972 | Organism: Severe | GAGTTAGTGCTAAACCACCGCCTGGAGATCAATTTAAACACCTCATACCACCTTATGTACA | 18499 |
| gb:MT027063 | Organism: Severe | GAGTTAGTGCTAAACCACCGCCTGGAGATCAATTTAAACACCTCATACCACCTTATGTACA | 18502 |
| gb:MT027062 | Organism: Severe | GAGTTAGTGCTAAACCACCGCCTGGAGATCAATTTAAACACCTCATACCACCTTATGTACA | 18502 |
| gb:MT019529 | Organism: Severe | GAGTTAGTGCTAAACCACCGCCTGGAGATCAATTTAAACACCTCATACCACCTTATGTACA | 18502 |
| gb:MN996529 | Organism: Severe | GAGTTAGTGCTAAACCACCGCCTGGAGATCAATTTAAACACCTCATACCACCTTATGTACA | 18490 |
| gb:MN996531 | Organism: Severe | GAGTTAGTGCTAAACCACCGCCTGGAGATCAATTTAAACACCTCATACCACCTTATGTACA | 18489 |
| gb:MT066176 | Organism: Severe | GAGTTAGTGCTAAACCACCGCCTGGAGATCAATTTAAACACCTCATACCACCTTATGTACA | 18502 |
| gb:MT027064 | Organism: Severe | GAGTTAGTGCTAAACCACCGCCTGGAGATCAATTTAAACACCTCATACCACCTTATGTACA | 18502 |
| gb:MN994468 | Organism: Severe | GAGTTAGTGCTAAACCACCGCCTGGAGATCAATTTAAACACCTCATACCACCTTATGTACA | 18502 |
| gb:MT072688 | Organism: Severe | GAGTTAGTGCTAAACCACCGCCTGGAGATCAATTTAAACACCTCATACCACCTTATGTACA | 18487 |
| gb:MN996527 | Organism: Severe | GAGTTAGTGCTAAACCACCGCCTGGAGATCAATTTAAACACCTCATACCACCTTATGTACA | 18469 |
| gb:MT093631 | Organism: Severe | GAGTTAGTGCTAAACCACCGCCTGGAGATCAATTTAAACACCTCATACCACCTTATGTACA | 18540 |
| gb:MT106053 | Organism: Severe | GAGTTAGTGCTAAACCACCGCCTGGAGATCAATTTAAACACCTCATACCACCTTATGTACA | 18502 |
| gb:MT019533 | Organism: Severe | GAGTTAGTGCTAAACCACCGCCTGGAGATCAATTTAAACACCTCATACCACCTTATGTACA | 18502 |
| gb:MT019531 | Organism: Severe | GAGTTAGTGCTAAACCACCGCCTGGAGATCAATTTAAACACCTCATACCACCTTATGTACA | 18502 |
| gb:MN996528 | Organism: Severe | GAGTTAGTGCTAAACCACCGCCTGGAGATCAATTTAAACACCTCATACCACCTTATGTACA | 18502 |
| gb:MN996530 | Organism: Severe | GAGTTAGTGCTAAACCACCGCCTGGAGATCAATTTAAACACCTCATACCACCTTATGTACA | 18488 |
| gb:MN908947 | Organism: Severe | GAGTTAGTGCTAAACCACCGCCTGGAGATCAATTTAAACACCTCATACCACCTTATGTACA | 18502 |
| gb:MT019532 | Organism: Severe | GAGTTAGTGCTAAACCACCGCCTGGAGATCAATTTAAACACCTCATACCACCTTATGTACA | 18502 |

\*\*\*\*\*

|             |                  |                                                              |       |
|-------------|------------------|--------------------------------------------------------------|-------|
| gb:MT020781 | Organism: Severe | AAGGACTTCCTTGGAATGTAGTGCGTATAAAGATTGTACAAATGTTAAGTGACACACTTA | 18550 |
| gb:MT007544 | Organism: Severe | AAGGACTTCCTTGGAATGTAGTGCGTATAAAGATTGTACAAATGTTAAGTGACACACTTA | 18562 |
| gb:MN994467 | Organism: Severe | AAGGACTTCCTTGGAATGTAGTGCGTATAAAGATTGTACAAATGTTAAGTGACACACTTA | 18562 |
| gb:MT044257 | Organism: Severe | AAGGACTTCCTTGGAATGTAGTGCGTATAAAGATTGTACAAATGTTAAGTGACACACTTA | 18562 |
| gb:MT106054 | Organism: Severe | AAGGACTTCCTTGGAATGTAGTGCGTATAAAGATTGTACAAATGTTAAGTGACACACTTA | 18562 |
| gb:MT049951 | Organism: Severe | AAGGACTTCCTTGGAATGTAGTGCGTATAAAGATTGTACAAATGTTAAGTGACACACTTA | 18562 |
| gb:MN975262 | Organism: Severe | AAGGACTTCCTTGGAATGTAGTGCGTATAAAGATTGTACAAATGTTAAGTGACACACTTA | 18562 |
| gb:MT106052 | Organism: Severe | AAGGACTTCCTTGGAATGTAGTGCGTATAAAGATTGTACAAATGTTAAGTGACACACTTA | 18562 |
| gb:LC522975 | Organism: Severe | AAGGACTTCCTTGGAATGTAGTGCGTATAAAGATTGTACAAATGTTAAGTGACACACTTA | 18559 |
| gb:LC522973 | Organism: Severe | AAGGACTTCCTTGGAATGTAGTGCGTATAAAGATTGTACAAATGTTAAGTGACACACTTA | 18559 |
| gb:LC522974 | Organism: Severe | AAGGACTTCCTTGGAATGTAGTGCGTATAAAGATTGTACAAATGTTAAGTGACACACTTA | 18559 |
| gb:MN985325 | Organism: Severe | AAGGACTTCCTTGGAATGTAGTGCGTATAAAGATTGTACAAATGTTAAGTGACACACTTA | 18562 |
| gb:MT020881 | Organism: Severe | AAGGACTTCCTTGGAATGTAGTGCGTATAAAGATTGTACAAATGTTAAGTGACACACTTA | 18562 |
| gb:MT020880 | Organism: Severe | AAGGACTTCCTTGGAATGTAGTGCGTATAAAGATTGTACAAATGTTAAGTGACACACTTA | 18562 |
| gb:MT066175 | Organism: Severe | AAGGACTTCCTTGGAATGTAGTGCGTATAAAGATTGTACAAATGTTAAGTGACACACTTA | 18562 |
| gb:MN997409 | Organism: Severe | AAGGACTTCCTTGGAATGTAGTGCGTATAAAGATTGTACAAATGTTAAGTGACACACTTA | 18562 |
| gb:MN938384 | Organism: Severe | AAGGACTTCCTTGGAATGTAGTGCGTATAAAGATTGTACAAATGTTAAGTGACACACTTA | 18530 |

|             |                 |                           |       |
|-------------|-----------------|---------------------------|-------|
| gb:MT044258 | Organism:Severe | AAGGACTTCCTTGGAAATGTAGTGC | 18538 |
| gb:MT039890 | Organism:Severe | AAGGACTTCCTTGGAAATGTAGTGC | 18562 |
| gb:MN988713 | Organism:Severe | AAGGACTTCCTTGGAAATGTAGTGC | 18562 |
| gb:LC521925 | Organism:Severe | AAGGACTTCCTTGGAAATGTAGTGC | 18535 |
| gb:MT093571 | Organism:Severe | AAGGACTTCCTTGGAAATGTAGTGC | 18562 |
| gb:MT039887 | Organism:Severe | AAGGACTTCCTTGGAAATGTAGTGC | 18562 |
| gb:MT019530 | Organism:Severe | AAGGACTTCCTTGGAAATGTAGTGC | 18562 |
| gb:MT039888 | Organism:Severe | AAGGACTTCCTTGGAAATGTAGTGC | 18562 |
| gb:LC522972 | Organism:Severe | AAGGACTTCCTTGGAAATGTAGTGC | 18559 |
| gb:MT027063 | Organism:Severe | AAGGACTTCCTTGGAAATGTAGTGC | 18562 |
| gb:MT027062 | Organism:Severe | AAGGACTTCCTTGGAAATGTAGTGC | 18562 |
| gb:MT019529 | Organism:Severe | AAGGACTTCCTTGGAAATGTAGTGC | 18562 |
| gb:MN996529 | Organism:Severe | AAGGACTTCCTTGGAAATGTAGTGC | 18550 |
| gb:MN996531 | Organism:Severe | AAGGACTTCCTTGGAAATGTAGTGC | 18549 |
| gb:MT066176 | Organism:Severe | AAGGACTTCCTTGGAAATGTAGTGC | 18562 |
| gb:MT027064 | Organism:Severe | AAGGACTTCCTTGGAAATGTAGTGC | 18562 |
| gb:MN994468 | Organism:Severe | AAGGACTTCCTTGGAAATGTAGTGC | 18562 |
| gb:MT072688 | Organism:Severe | AAGGACTTCCTTGGAAATGTAGTGC | 18547 |
| gb:MN996527 | Organism:Severe | AAGGACTTCCTTGGAAATGTAGTGC | 18529 |
| gb:MT093631 | Organism:Severe | AAGGACTTCCTTGGAAATGTAGTGC | 18600 |
| gb:MT106053 | Organism:Severe | AAGGACTTCCTTGGAAATGTAGTGC | 18562 |
| gb:MT019533 | Organism:Severe | AAGGACTTCCTTGGAAATGTAGTGC | 18562 |
| gb:MT019531 | Organism:Severe | AAGGACTTCCTTGGAAATGTAGTGC | 18562 |
| gb:MN996528 | Organism:Severe | AAGGACTTCCTTGGAAATGTAGTGC | 18562 |
| gb:MN996530 | Organism:Severe | AAGGACTTCCTTGGAAATGTAGTGC | 18548 |
| gb:MN908947 | Organism:Severe | AAGGACTTCCTTGGAAATGTAGTGC | 18562 |
| gb:MT019532 | Organism:Severe | AAGGACTTCCTTGGAAATGTAGTGC | 18562 |

\*\*\*\*\*

|             |                 |                           |       |
|-------------|-----------------|---------------------------|-------|
| gb:MT020781 | Organism:Severe | AAAATCTCTCTGACAGAGTCGATTT | 18610 |
| gb:MT007544 | Organism:Severe | AAAATCTCTCTGACAGAGTCGATTT | 18622 |
| gb:MN994467 | Organism:Severe | AAAATCTCTCTGACAGAGTCGATTT | 18622 |
| gb:MT044257 | Organism:Severe | AAAATCTCTCTGACAGAGTCGATTT | 18622 |
| gb:MT106054 | Organism:Severe | AAAATCTCTCTGACAGAGTCGATTT | 18622 |
| gb:MT049951 | Organism:Severe | AAAATCTCTCTGACAGAGTCGATTT | 18622 |
| gb:MN975262 | Organism:Severe | AAAATCTCTCTGACAGAGTCGATTT | 18622 |
| gb:MT106052 | Organism:Severe | AAAATCTCTCTGACAGAGTCGATTT | 18622 |
| gb:LC522975 | Organism:Severe | AAAATCTCTCTGACAGAGTCGATTT | 18619 |
| gb:LC522973 | Organism:Severe | AAAATCTCTCTGACAGAGTCGATTT | 18619 |
| gb:LC522974 | Organism:Severe | AAAATCTCTCTGACAGAGTCGATTT | 18619 |
| gb:MN985325 | Organism:Severe | AAAATCTCTCTGACAGAGTCGATTT | 18622 |
| gb:MT020881 | Organism:Severe | AAAATCTCTCTGACAGAGTCGATTT | 18622 |
| gb:MT020880 | Organism:Severe | AAAATCTCTCTGACAGAGTCGATTT | 18622 |
| gb:MT066175 | Organism:Severe | AAAATCTCTCTGACAGAGTCGATTT | 18622 |
| gb:MN997409 | Organism:Severe | AAAATCTCTCTGACAGAGTCGATTT | 18622 |
| gb:MN938384 | Organism:Severe | AAAATCTCTCTGACAGAGTCGATTT | 18590 |
| gb:MT044258 | Organism:Severe | AAAATCTCTCTGACAGAGTCGATTT | 18598 |
| gb:MT039890 | Organism:Severe | AAAATCTCTCTGACAGAGTCGATTT | 18622 |
| gb:MN988713 | Organism:Severe | AAAATCTCTCTGACAGAGTCGATTT | 18622 |
| gb:LC521925 | Organism:Severe | AAAATCTCTCTGACAGAGTCGATTT | 18595 |
| gb:MT093571 | Organism:Severe | AAAATCTCTCTGACAGAGTCGATTT | 18622 |
| gb:MT039887 | Organism:Severe | AAAATCTCTCTGACAGAGTCGATTT | 18622 |
| gb:MT019530 | Organism:Severe | AAAATCTCTCTGACAGAGTCGATTT | 18622 |
| gb:MT039888 | Organism:Severe | AAAATCTCTCTGACAGAGTCGATTT | 18622 |
| gb:LC522972 | Organism:Severe | AAAATCTCTCTGACAGAGTCGATTT | 18619 |
| gb:MT027063 | Organism:Severe | AAAATCTCTCTGACAGAGTCGATTT | 18622 |
| gb:MT027062 | Organism:Severe | AAAATCTCTCTGACAGAGTCGATTT | 18622 |
| gb:MT019529 | Organism:Severe | AAAATCTCTCTGACAGAGTCGATTT | 18622 |
| gb:MN996529 | Organism:Severe | AAAATCTCTCTGACAGAGTCGATTT | 18610 |
| gb:MN996531 | Organism:Severe | AAAATCTCTCTGACAGAGTCGATTT | 18609 |
| gb:MT066176 | Organism:Severe | AAAATCTCTCTGACAGAGTCGATTT | 18622 |
| gb:MT027064 | Organism:Severe | AAAATCTCTCTGACAGAGTCGATTT | 18622 |
| gb:MN994468 | Organism:Severe | AAAATCTCTCTGACAGAGTCGATTT | 18622 |
| gb:MT072688 | Organism:Severe | AAAATCTCTCTGACAGAGTCGATTT | 18607 |
| gb:MN996527 | Organism:Severe | AAAATCTCTCTGACAGAGTCGATTT | 18589 |

|             |                 |                                                             |       |
|-------------|-----------------|-------------------------------------------------------------|-------|
| gb:MT093631 | Organism:Severe | AAAATCTCTCTGACAGAGTCGATTTGTCTTATGGGCACATGGCTTTGAGTTGACATCTA | 18660 |
| gb:MT106053 | Organism:Severe | AAAATCTCTCTGACAGAGTCGATTTGTCTTATGGGCACATGGCTTTGAGTTGACATCTA | 18622 |
| gb:MT019533 | Organism:Severe | AAAATCTCTCTGACAGAGTCGATTTGTCTTATGGGCACATGGCTTTGAGTTGACATCTA | 18622 |
| gb:MT019531 | Organism:Severe | AAAATCTCTCTGACAGAGTCGATTTGTCTTATGGGCACATGGCTTTGAGTTGACATCTA | 18622 |
| gb:MN996528 | Organism:Severe | AAAATCTCTCTGACAGAGTCGATTTGTCTTATGGGCACATGGCTTTGAGTTGACATCTA | 18622 |
| gb:MN996530 | Organism:Severe | AAAATCTCTCTGACAGAGTCGATTTGTCTTATGGGCACATGGCTTTGAGTTGACATCTA | 18608 |
| gb:MN908947 | Organism:Severe | AAAATCTCTCTGACAGAGTCGATTTGTCTTATGGGCACATGGCTTTGAGTTGACATCTA | 18622 |
| gb:MT019532 | Organism:Severe | AAAATCTCTCTGACAGAGTCGATTTGTCTTATGGGCACATGGCTTTGAGTTGACATCTA | 18622 |

\*\*\*\*\*

|             |                 |                                                              |       |
|-------------|-----------------|--------------------------------------------------------------|-------|
| gb:MT020781 | Organism:Severe | TGAAGTATTTTGTGAAAATAGGACCTGAGCGCACCTGTTGTCTATGTGATAGACGTGCCA | 18670 |
| gb:MT007544 | Organism:Severe | TGAAGTATTTTGTGAAAATAGGACCTGAGCGCACCTGTTGTCTATGTGATAGACGTGCCA | 18682 |
| gb:MN994467 | Organism:Severe | TGAAGTATTTTGTGAAAATAGGACCTGAGCGCACCTGTTGTCTATGTGATAGACGTGCCA | 18682 |
| gb:MT044257 | Organism:Severe | TGAAGTATTTTGTGAAAATAGGACCTGAGCGCACCTGTTGTCTATGTGATAGACGTGCCA | 18682 |
| gb:MT106054 | Organism:Severe | TGAAGTATTTTGTGAAAATAGGACCTGAGCGCACCTGTTGTCTATGTGATAGACGTGCCA | 18682 |
| gb:MT049951 | Organism:Severe | TGAAGTATTTTGTGAAAATAGGACCTGAGCGCACCTGTTGTCTATGTGATAGACGTGCCA | 18682 |
| gb:MN975262 | Organism:Severe | TGAAGTATTTTGTGAAAATAGGACCTGAGCGCACCTGTTGTCTATGTGATAGACGTGCCA | 18682 |
| gb:MT106052 | Organism:Severe | TGAAGTATTTTGTGAAAATAGGACCTGAGCGCACCTGTTGTCTATGTGATAGACGTGCCA | 18682 |
| gb:LC522975 | Organism:Severe | TGAAGTATTTTGTGAAAATAGGACCTGAGCGCACCTGTTGTCTATGTGATAGACGTGCCA | 18679 |
| gb:LC522973 | Organism:Severe | TGAAGTATTTTGTGAAAATAGGACCTGAGCGCACCTGTTGTCTATGTGATAGACGTGCCA | 18679 |
| gb:LC522974 | Organism:Severe | TGAAGTATTTTGTGAAAATAGGACCTGAGCGCACCTGTTGTCTATGTGATAGACGTGCCA | 18679 |
| gb:MN985325 | Organism:Severe | TGAAGTATTTTGTGAAAATAGGACCTGAGCGCACCTGTTGTCTATGTGATAGACGTGCCA | 18682 |
| gb:MT020881 | Organism:Severe | TGAAGTATTTTGTGAAAATAGGACCTGAGCGCACCTGTTGTCTATGTGATAGACGTGCCA | 18682 |
| gb:MT020880 | Organism:Severe | TGAAGTATTTTGTGAAAATAGGACCTGAGCGCACCTGTTGTCTATGTGATAGACGTGCCA | 18682 |
| gb:MT066175 | Organism:Severe | TGAAGTATTTTGTGAAAATAGGACCTGAGCGCACCTGTTGTCTATGTGATAGACGTGCCA | 18682 |
| gb:MN997409 | Organism:Severe | TGAAGTATTTTGTGAAAATAGGACCTGAGCGCACCTGTTGTCTATGTGATAGACGTGCCA | 18682 |
| gb:MN938384 | Organism:Severe | TGAAGTATTTTGTGAAAATAGGACCTGAGCGCACCTGTTGTCTATGTGATAGACGTGCCA | 18650 |
| gb:MT044258 | Organism:Severe | TGAAGTATTTTGTGAAAATAGGACCTGAGCGCACCTGTTGTCTATGTGATAGACGTGCCA | 18658 |
| gb:MT039890 | Organism:Severe | TGAAGTATTTTGTGAAAATAGGACCTGAGCGCACCTGTTGTCTATGTGATAGACGTGCCA | 18682 |
| gb:MN988713 | Organism:Severe | TGAAGTATTTTGTGAAAATAGGACCTGAGCGCACCTGTTGTCTATGTGATAGACGTGCCA | 18682 |
| gb:LC521925 | Organism:Severe | TGAAGTATTTTGTGAAAATAGGACCTGAGCGCACCTGTTGTCTATGTGATAGACGTGCCA | 18655 |
| gb:MT093571 | Organism:Severe | TGAAGTATTTTGTGAAAATAGGACCTGAGCGCACCTGTTGTCTATGTGATAGACGTGCCA | 18682 |
| gb:MT039887 | Organism:Severe | TGAAGTATTTTGTGAAAATAGGACCTGAGCGCACCTGTTGTCTATGTGATAGACGTGCCA | 18682 |
| gb:MT019530 | Organism:Severe | TGAAGTATTTTGTGAAAATAGGACCTGAGCGCACCTGTTGTCTATGTGATAGACGTGCCA | 18682 |
| gb:MT039888 | Organism:Severe | TGAAGTATTTTGTGAAAATAGGACCTGAGCGCACCTGTTGTCTATGTGATAGACGTGCCA | 18682 |
| gb:LC522972 | Organism:Severe | TGAAGTATTTTGTGAAAATAGGACCTGAGCGCACCTGTTGTCTATGTGATAGACGTGCCA | 18679 |
| gb:MT027063 | Organism:Severe | TGAAGTATTTTGTGAAAATAGGACCTGAGCGCACCTGTTGTCTATGTGATAGACGTGCCA | 18682 |
| gb:MT027062 | Organism:Severe | TGAAGTATTTTGTGAAAATAGGACCTGAGCGCACCTGTTGTCTATGTGATAGACGTGCCA | 18682 |
| gb:MT019529 | Organism:Severe | TGAAGTATTTTGTGAAAATAGGACCTGAGCGCACCTGTTGTCTATGTGATAGACGTGCCA | 18682 |
| gb:MN996529 | Organism:Severe | TGAAGTATTTTGTGAAAATAGGACCTGAGCGCACCTGTTGTCTATGTGATAGACGTGCCA | 18670 |
| gb:MN996531 | Organism:Severe | TGAAGTATTTTGTGAAAATAGGACCTGAGCGCACCTGTTGTCTATGTGATAGACGTGCCA | 18669 |
| gb:MT066176 | Organism:Severe | TGAAGTATTTTGTGAAAATAGGACCTGAGCGCACCTGTTGTCTATGTGATAGACGTGCCA | 18682 |
| gb:MT027064 | Organism:Severe | TGAAGTATTTTGTGAAAATAGGACCTGAGCGCACCTGTTGTCTATGTGATAGACGTGCCA | 18682 |
| gb:MN994468 | Organism:Severe | TGAAGTATTTTGTGAAAATAGGACCTGAGCGCACCTGTTGTCTATGTGATAGACGTGCCA | 18682 |
| gb:MT072688 | Organism:Severe | TGAAGTATTTTGTGAAAATAGGACCTGAGCGCACCTGTTGTCTATGTGATAGACGTGCCA | 18667 |
| gb:MN996527 | Organism:Severe | TGAAGTATTTTGTGAAAATAGGACCTGAGCGCACCTGTTGTCTATGTGATAGACGTGCCA | 18649 |
| gb:MT093631 | Organism:Severe | TGAAGTATTTTGTGAAAATAGGACCTGAGCGCACCTGTTGTCTATGTGATAGACGTGCCA | 18720 |
| gb:MT106053 | Organism:Severe | TGAAGTATTTTGTGAAAATAGGACCTGAGCGCACCTGTTGTCTATGTGATAGACGTGCCA | 18682 |
| gb:MT019533 | Organism:Severe | TGAAGTATTTTGTGAAAATAGGACCTGAGCGCACCTGTTGTCTATGTGATAGACGTGCCA | 18682 |
| gb:MT019531 | Organism:Severe | TGAAGTATTTTGTGAAAATAGGACCTGAGCGCACCTGTTGTCTATGTGATAGACGTGCCA | 18682 |
| gb:MN996528 | Organism:Severe | TGAAGTATTTTGTGAAAATAGGACCTGAGCGCACCTGTTGTCTATGTGATAGACGTGCCA | 18682 |
| gb:MN996530 | Organism:Severe | TGAAGTATTTTGTGAAAATAGGACCTGAGCGCACCTGTTGTCTATGTGATAGACGTGCCA | 18668 |
| gb:MN908947 | Organism:Severe | TGAAGTATTTTGTGAAAATAGGACCTGAGCGCACCTGTTGTCTATGTGATAGACGTGCCA | 18682 |
| gb:MT019532 | Organism:Severe | TGAAGTATTTTGTGAAAATAGGACCTGAGCGCACCTGTTGTCTATGTGATAGACGTGCCA | 18682 |

\*\*\*\*\*

|             |                 |                                                             |       |
|-------------|-----------------|-------------------------------------------------------------|-------|
| gb:MT020781 | Organism:Severe | CATGCTTTCCACTGCTTCAGACACTTATGCCTGTTGGCATCATTCTATTGGATTTGATT | 18730 |
| gb:MT007544 | Organism:Severe | CATGCTTTCCACTGCTTCAGACACTTATGCCTGTTGGCATCATTCTATTGGATTTGATT | 18742 |
| gb:MN994467 | Organism:Severe | CATGCTTTCCACTGCTTCAGACACTTATGCCTGTTGGCATCATTCTATTGGATTTGATT | 18742 |
| gb:MT044257 | Organism:Severe | CATGCTTTCCACTGCTTCAGACACTTATGCCTGTTGGCATCATTCTATTGGATTTGATT | 18742 |
| gb:MT106054 | Organism:Severe | CATGCTTTCCACTGCTTCAGACACTTATGCCTGTTGGCATCATTCTATTGGATTTGATT | 18742 |
| gb:MT049951 | Organism:Severe | CATGCTTTCCACTGCTTCAGACACTTATGCCTGTTGGCATCATTCTATTGGATTTGATT | 18742 |
| gb:MN975262 | Organism:Severe | CATGCTTTCCACTGCTTCAGACACTTATGCCTGTTGGCATCATTCTATTGGATTTGATT | 18742 |
| gb:MT106052 | Organism:Severe | CATGCTTTCCACTGCTTCAGACACTTATGCCTGTTGGCATCATTCTATTGGATTTGATT | 18742 |
| gb:LC522975 | Organism:Severe | CATGCTTTCCACTGCTTCAGACACTTATGCCTGTTGGCATCATTCTATTGGATTTGATT | 18739 |



|             |                  |                                                              |       |
|-------------|------------------|--------------------------------------------------------------|-------|
| gb:MT019529 | Organism: Severe | ACGTCTATAATCCGTTTATGATTGATGTTCAACAATGGGGTTTTACAGGTAACCTACAAA | 18802 |
| gb:MN996529 | Organism: Severe | ACGTCTATAATCCGTTTATGATTGATGTTCAACAATGGGGTTTTACAGGTAACCTACAAA | 18790 |
| gb:MN996531 | Organism: Severe | ACGTCTATAATCCGTTTATGATTGATGTTCAACAATGGGGTTTTACAGGTAACCTACAAA | 18789 |
| gb:MT066176 | Organism: Severe | ACGTCTATAATCCGTTTATGATTGATGTTCAACAATGGGGTTTTACAGGTAACCTACAAA | 18802 |
| gb:MT027064 | Organism: Severe | ACGTCTATAATCCGTTTATGATTGATGTTCAACAATGGGGTTTTACAGGTAACCTACAAA | 18802 |
| gb:MN994468 | Organism: Severe | ACGTCTATAATCCGTTTATGATTGATGTTCAACAATGGGGTTTTACAGGTAACCTACAAA | 18802 |
| gb:MT072688 | Organism: Severe | ACGTCTATAATCCGTTTATGATTGATGTTCAACAATGGGGTTTTACAGGTAACCTACAAA | 18787 |
| gb:MN996527 | Organism: Severe | ACGTCTATAATCCGTTTATGATTGATGTTCAACAATGGGGTTTTACAGGTAACCTACAAA | 18769 |
| gb:MT093631 | Organism: Severe | ACGTCTATAATCCGTTTATGATTGATGTTCAACAATGGGGTTTTACAGGTAACCTACAAA | 18840 |
| gb:MT106053 | Organism: Severe | ACGTCTATAATCCGTTTATGATTGATGTTCAACAATGGGGTTTTACAGGTAACCTACAAA | 18802 |
| gb:MT019533 | Organism: Severe | ACGTCTATAATCCGTTTATGATTGATGTTCAACAATGGGGTTTTACAGGTAACCTACAAA | 18802 |
| gb:MT019531 | Organism: Severe | ACGTCTATAATCCGTTTATGATTGATGTTCAACAATGGGGTTTTACAGGTAACCTACAAA | 18802 |
| gb:MN996528 | Organism: Severe | ACGTCTATAATCCGTTTATGATTGATGTTCAACAATGGGGTTTTACAGGTAACCTACAAA | 18802 |
| gb:MN996530 | Organism: Severe | ACGTCTATAATCCGTTTATGATTGATGTTCAACAATGGGGTTTTACAGGTAACCTACAAA | 18788 |
| gb:MN908947 | Organism: Severe | ACGTCTATAATCCGTTTATGATTGATGTTCAACAATGGGGTTTTACAGGTAACCTACAAA | 18802 |
| gb:MT019532 | Organism: Severe | ACGTCTATAATCCGTTTATGATTGATGTTCAACAATGGGGTTTTACAGGTAACCTACAAA | 18802 |

\*\*\*\*\*

|             |                  |                                                              |       |
|-------------|------------------|--------------------------------------------------------------|-------|
| gb:MT020781 | Organism: Severe | GCAACCATGATCTGTATTGTCAAGTCCATGGTAATGCACATGTAGCTAGTTGTGATGCAA | 18850 |
| gb:MT007544 | Organism: Severe | GCAACCATGATCTGTATTGTCAAGTCCATGGTAATGCACATGTAGCTAGTTGTGATGCAA | 18862 |
| gb:MN994467 | Organism: Severe | GCAACCATGATCTGTATTGTCAAGTCCATGGTAATGCACATGTAGCTAGTTGTGATGCAA | 18862 |
| gb:MT044257 | Organism: Severe | GCAACCATGATCTGTATTGTCAAGTCCATGGTAATGCACATGTAGCTAGTTGTGATGCAA | 18862 |
| gb:MT106054 | Organism: Severe | GCAACCATGATCTGTATTGTCAAGTCCATGGTAATGCACATGTAGCTAGTTGTGATGCAA | 18862 |
| gb:MT049951 | Organism: Severe | GCAACCATGATCTGTATTGTCAAGTCCATGGTAATGCACATGTAGCTAGTTGTGATGCAA | 18862 |
| gb:MN975262 | Organism: Severe | GCAACCATGATCTGTATTGTCAAGTCCATGGTAATGCACATGTAGCTAGTTGTGATGCAA | 18862 |
| gb:MT106052 | Organism: Severe | GCAACCATGATCTGTATTGTCAAGTCCATGGTAATGCACATGTAGCTAGTTGTGATGCAA | 18862 |
| gb:LC522975 | Organism: Severe | GCAACCATGATCTGTATTGTCAAGTCCATGGTAATGCACATGTAGCTAGTTGTGATGCAA | 18859 |
| gb:LC522973 | Organism: Severe | GCAACCATGATCTGTATTGTCAAGTCCATGGTAATGCACATGTAGCTAGTTGTGATGCAA | 18859 |
| gb:LC522974 | Organism: Severe | GCAACCATGATCTGTATTGTCAAGTCCATGGTAATGCACATGTAGCTAGTTGTGATGCAA | 18859 |
| gb:MN985325 | Organism: Severe | GCAACCATGATCTGTATTGTCAAGTCCATGGTAATGCACATGTAGCTAGTTGTGATGCAA | 18862 |
| gb:MT020881 | Organism: Severe | GCAACCATGATCTGTATTGTCAAGTCCATGGTAATGCACATGTAGCTAGTTGTGATGCAA | 18862 |
| gb:MT020880 | Organism: Severe | GCAACCATGATCTGTATTGTCAAGTCCATGGTAATGCACATGTAGCTAGTTGTGATGCAA | 18862 |
| gb:MT066175 | Organism: Severe | GCAACCATGATCTGTATTGTCAAGTCCATGGTAATGCACATGTAGCTAGTTGTGATGCAA | 18862 |
| gb:MN997409 | Organism: Severe | GCAACCATGATCTGTATTGTCAAGTCCATGGTAATGCACATGTAGCTAGTTGTGATGCAA | 18862 |
| gb:MN938384 | Organism: Severe | GCAACCATGATCTGTATTGTCAAGTCCATGGTAATGCACATGTAGCTAGTTGTGATGCAA | 18830 |
| gb:MT044258 | Organism: Severe | GCAACCATGATCTGTATTGTCAAGTCCATGGTAATGCACATGTAGCTAGTTGTGATGCAA | 18838 |
| gb:MT039890 | Organism: Severe | GCAACCATGATCTGTATTGTCAAGTCCATGGTAATGCACATGTAGCTAGTTGTGATGCAA | 18862 |
| gb:MN988713 | Organism: Severe | GCAACCATGATCTGTATTGTCAAGTCCATGGTAATGCACATGTAGCTAGTTGTGATGCAA | 18862 |
| gb:LC521925 | Organism: Severe | GCAACCATGATCTGTATTGTCAAGTCCATGGTAATGCACATGTAGCTAGTTGTGATGCAA | 18835 |
| gb:MT093571 | Organism: Severe | GCAACCATGATCTGTATTGTCAAGTCCATGGTAATGCACATGTAGCTAGTTGTGATGCAA | 18862 |
| gb:MT039887 | Organism: Severe | GCAACCATGATCTGTATTGTCAAGTCCATGGTAATGCACATGTAGCTAGTTGTGATGCAA | 18862 |
| gb:MT019530 | Organism: Severe | GCAACCATGATCTGTATTGTCAAGTCCATGGTAATGCACATGTAGCTAGTTGTGATGCAA | 18862 |
| gb:MT039888 | Organism: Severe | GCAACCATGATCTGTATTGTCAAGTCCATGGTAATGCACATGTAGCTAGTTGTGATGCAA | 18862 |
| gb:LC522972 | Organism: Severe | GCAACCATGATCTGTATTGTCAAGTCCATGGTAATGCACATGTAGCTAGTTGTGATGCAA | 18859 |
| gb:MT027063 | Organism: Severe | GCAACCATGATCTGTATTGTCAAGTCCATGGTAATGCACATGTAGCTAGTTGTGATGCAA | 18862 |
| gb:MT027062 | Organism: Severe | GCAACCATGATCTGTATTGTCAAGTCCATGGTAATGCACATGTAGCTAGTTGTGATGCAA | 18862 |
| gb:MT019529 | Organism: Severe | GCAACCATGATCTGTATTGTCAAGTCCATGGTAATGCACATGTAGCTAGTTGTGATGCAA | 18862 |
| gb:MN996529 | Organism: Severe | GCAACCATGATCTGTATTGTCAAGTCCATGGTAATGCACATGTAGCTAGTTGTGATGCAA | 18850 |
| gb:MN996531 | Organism: Severe | GCAACCATGATCTGTATTGTCAAGTCCATGGTAATGCACATGTAGCTAGTTGTGATGCAA | 18849 |
| gb:MT066176 | Organism: Severe | GCAACCATGATCTGTATTGTCAAGTCCATGGTAATGCACATGTAGCTAGTTGTGATGCAA | 18862 |
| gb:MT027064 | Organism: Severe | GCAACCATGATCTGTATTGTCAAGTCCATGGTAATGCACATGTAGCTAGTTGTGATGCAA | 18862 |
| gb:MN994468 | Organism: Severe | GCAACCATGATCTGTATTGTCAAGTCCATGGTAATGCACATGTAGCTAGTTGTGATGCAA | 18862 |
| gb:MT072688 | Organism: Severe | GCAACCATGATCTGTATTGTCAAGTCCATGGTAATGCACATGTAGCTAGTTGTGATGCAA | 18847 |
| gb:MN996527 | Organism: Severe | GCAACCATGATCTGTATTGTCAAGTCCATGGTAATGCACATGTAGCTAGTTGTGATGCAA | 18829 |
| gb:MT093631 | Organism: Severe | GCAACCATGATCTGTATTGTCAAGTCCATGGTAATGCACATGTAGCTAGTTGTGATGCAA | 18900 |
| gb:MT106053 | Organism: Severe | GCAACCATGATCTGTATTGTCAAGTCCATGGTAATGCACATGTAGCTAGTTGTGATGCAA | 18862 |
| gb:MT019533 | Organism: Severe | GCAACCATGATCTGTATTGTCAAGTCCATGGTAATGCACATGTAGCTAGTTGTGATGCAA | 18862 |
| gb:MT019531 | Organism: Severe | GCAACCATGATCTGTATTGTCAAGTCCATGGTAATGCACATGTAGCTAGTTGTGATGCAA | 18862 |
| gb:MN996528 | Organism: Severe | GCAACCATGATCTGTATTGTCAAGTCCATGGTAATGCACATGTAGCTAGTTGTGATGCAA | 18862 |
| gb:MN996530 | Organism: Severe | GCAACCATGATCTGTATTGTCAAGTCCATGGTAATGCACATGTAGCTAGTTGTGATGCAA | 18848 |
| gb:MN908947 | Organism: Severe | GCAACCATGATCTGTATTGTCAAGTCCATGGTAATGCACATGTAGCTAGTTGTGATGCAA | 18862 |
| gb:MT019532 | Organism: Severe | GCAACCATGATCTGTATTGTCAAGTCCATGGTAATGCACATGTAGCTAGTTGTGATGCAA | 18862 |

\*\*\*\*\*

|             |                  |                                                             |       |
|-------------|------------------|-------------------------------------------------------------|-------|
| gb:MT020781 | Organism: Severe | TCATGACTAGGTGTCTAGCTGTCCACGAGTGCTTTGTTAAGCGTGTGACTGGACTATTG | 18910 |
|-------------|------------------|-------------------------------------------------------------|-------|





|             |                 |                                                               |       |
|-------------|-----------------|---------------------------------------------------------------|-------|
| gb:LC521925 | Organism:Severe | AATATCCTATAATTGGTGATGAACCTGAAGATTAATGCGGCTTGTAGAAAGGTTCAACACA | 18955 |
| gb:MT093571 | Organism:Severe | AATATCCTATAATTGGTGATGAACCTGAAGATTAATGCGGCTTGTAGAAAGGTTCAACACA | 18982 |
| gb:MT039887 | Organism:Severe | AATATCCTATAATTGGTGATGAACCTGAAGATTAATGCGGCTTGTAGAAAGGTTCAACACA | 18982 |
| gb:MT019530 | Organism:Severe | AATATCCTATAATTGGTGATGAACCTGAAGATTAATGCGGCTTGTAGAAAGGTTCAACACA | 18982 |
| gb:MT039888 | Organism:Severe | AATATCCTATAATTGGTGATGAACCTGAAGATTAATGCGGCTTGTAGAAAGGTTCAACACA | 18982 |
| gb:LC522972 | Organism:Severe | AATATCCTATAATTGGTGATGAACCTGAAGATTAATGCGGCTTGTAGAAAGGTTCAACACA | 18979 |
| gb:MT027063 | Organism:Severe | AATATCCTATAATTGGTGATGAACCTGAAGATTAATGCGGCTTGTAGAAAGGTTCAACACA | 18982 |
| gb:MT027062 | Organism:Severe | AATATCCTATAATTGGTGATGAACCTGAAGATTAATGCGGCTTGTAGAAAGGTTCAACACA | 18982 |
| gb:MT019529 | Organism:Severe | AATATCCTATAATTGGTGATGAACCTGAAGATTAATGCGGCTTGTAGAAAGGTTCAACACA | 18982 |
| gb:MN996529 | Organism:Severe | AATATCCTATAATTGGTGATGAACCTGAAGATTAATGCGGCTTGTAGAAAGGTTCAACACA | 18970 |
| gb:MN996531 | Organism:Severe | AATATCCTATAATTGGTGATGAACCTGAAGATTAATGCGGCTTGTAGAAAGGTTCAACACA | 18969 |
| gb:MT066176 | Organism:Severe | AATATCCTATAATTGGTGATGAACCTGAAGATTAATGCGGCTTGTAGAAAGGTTCAACACA | 18982 |
| gb:MT027064 | Organism:Severe | AATATCCTATAATTGGTGATGAACCTGAAGATTAATGCGGCTTGTAGAAAGGTTCAACACA | 18982 |
| gb:MN994468 | Organism:Severe | AATATCCTATAATTGGTGATGAACCTGAAGATTAATGCGGCTTGTAGAAAGGTTCAACACA | 18982 |
| gb:MT072688 | Organism:Severe | AATATCCTATAATTGGTGATGAACCTGAAGATTAATGCGGCTTGTAGAAAGGTTCAACACA | 18967 |
| gb:MN996527 | Organism:Severe | AATATCCTATAATTGGTGATGAACCTGAAGATTAATGCGGCTTGTAGAAAGGTTCAACACA | 18949 |
| gb:MT093631 | Organism:Severe | AATATCCTATAATTGGTGATGAACCTGAAGATTAATGCGGCTTGTAGAAAGGTTCAACACA | 19020 |
| gb:MT106053 | Organism:Severe | AATATCCTATAATTGGTGATGAACCTGAAGATTAATGCGGCTTGTAGAAAGGTTCAACACA | 18982 |
| gb:MT019533 | Organism:Severe | AATATCCTATAATTGGTGATGAACCTGAAGATTAATGCGGCTTGTAGAAAGGTTCAACACA | 18982 |
| gb:MT019531 | Organism:Severe | AATATCCTATAATTGGTGATGAACCTGAAGATTAATGCGGCTTGTAGAAAGGTTCAACACA | 18982 |
| gb:MN996528 | Organism:Severe | AATATCCTATAATTGGTGATGAACCTGAAGATTAATGCGGCTTGTAGAAAGGTTCAACACA | 18982 |
| gb:MN996530 | Organism:Severe | AATATCCTATAATTGGTGATGAACCTGAAGATTAATGCGGCTTGTAGAAAGGTTCAACACA | 18968 |
| gb:MN908947 | Organism:Severe | AATATCCTATAATTGGTGATGAACCTGAAGATTAATGCGGCTTGTAGAAAGGTTCAACACA | 18982 |
| gb:MT019532 | Organism:Severe | AATATCCTATAATTGGTGATGAACCTGAAGATTAATGCGGCTTGTAGAAAGGTTCAACACA | 18982 |

\*\*\*\*\*

|             |                 |                                                             |       |
|-------------|-----------------|-------------------------------------------------------------|-------|
| gb:MT020781 | Organism:Severe | TGGTTGTTAAAGCTGCATTATTAGCAGACAAATCCCAGTTCCTCACGACATTGGTAACC | 19030 |
| gb:MT007544 | Organism:Severe | TGGTTGTTAAAGCTGCATTATTAGCAGACAAATCCCAGTTCCTCACGACATTGGTAACC | 19042 |
| gb:MN994467 | Organism:Severe | TGGTTGTTAAAGCTGCATTATTAGCAGACAAATCCCAGTTCCTCACGACATTGGTAACC | 19042 |
| gb:MT044257 | Organism:Severe | TGGTTGTTAAAGCTGCATTATTAGCAGACAAATCCCAGTTCCTCACGACATTGGTAACC | 19042 |
| gb:MT106054 | Organism:Severe | TGGTTGTTAAAGCTGCATTATTAGCAGACAAATCCCAGTTCCTCACGACATTGGTAACC | 19042 |
| gb:MT049951 | Organism:Severe | TGGTTGTTAAAGCTGCATTATTAGCAGACAAATCCCAGTTCCTCACGACATTGGTAACC | 19042 |
| gb:MN975262 | Organism:Severe | TGGTTGTTAAAGCTGCATTATTAGCAGACAAATCCCAGTTCCTCACGACATTGGTAACC | 19042 |
| gb:MT106052 | Organism:Severe | TGGTTGTTAAAGCTGCATTATTAGCAGACAAATCCCAGTTCCTCACGACATTGGTAACC | 19042 |
| gb:LC522975 | Organism:Severe | TGGTTGTTAAAGCTGCATTATTAGCAGACAAATCCCAGTTCCTCACGACATTGGTAACC | 19039 |
| gb:LC522973 | Organism:Severe | TGGTTGTTAAAGCTGCATTATTAGCAGACAAATCCCAGTTCCTCACGACATTGGTAACC | 19039 |
| gb:LC522974 | Organism:Severe | TGGTTGTTAAAGCTGCATTATTAGCAGACAAATCCCAGTTCCTCACGACATTGGTAACC | 19039 |
| gb:MN985325 | Organism:Severe | TGGTTGTTAAAGCTGCATTATTAGCAGACAAATCCCAGTTCCTCACGACATTGGTAACC | 19042 |
| gb:MT020881 | Organism:Severe | TGGTTGTTAAAGCTGCATTATTAGCAGACAAATCCCAGTTCCTCACGACATTGGTAACC | 19042 |
| gb:MT020880 | Organism:Severe | TGGTTGTTAAAGCTGCATTATTAGCAGACAAATCCCAGTTCCTCACGACATTGGTAACC | 19042 |
| gb:MT066175 | Organism:Severe | TGGTTGTTAAAGCTGCATTATTAGCAGACAAATCCCAGTTCCTCACGACATTGGTAACC | 19042 |
| gb:MN997409 | Organism:Severe | TGGTTGTTAAAGCTGCATTATTAGCAGACAAATCCCAGTTCCTCACGACATTGGTAACC | 19042 |
| gb:MN938384 | Organism:Severe | TGGTTGTTAAAGCTGCATTATTAGCAGACAAATCCCAGTTCCTCACGACATTGGTAACC | 19010 |
| gb:MT044258 | Organism:Severe | TGGTTGTTAAAGCTGCATTATTAGCAGACAAATCCCAGTTCCTCACGACATTGGTAACC | 19018 |
| gb:MT039890 | Organism:Severe | TGGTTGTTAAAGCTGCATTATTAGCAGACAAATCCCAGTTCCTCACGACATTGGTAACC | 19042 |
| gb:MN988713 | Organism:Severe | TGGTTGTTAAAGCTGCATTATTAGCAGACAAATCCCAGTTCCTCACGACATTGGTAACC | 19042 |
| gb:LC521925 | Organism:Severe | TGGTTGTTAAAGCTGCATTATTAGCAGACAAATCCCAGTTCCTCACGACATTGGTAACC | 19015 |
| gb:MT093571 | Organism:Severe | TGGTTGTTAAAGCTGCATTATTAGCAGACAAATCCCAGTTCCTCACGACATTGGTAACC | 19042 |
| gb:MT039887 | Organism:Severe | TGGTTGTTAAAGCTGCATTATTAGCAGACAAATCCCAGTTCCTCACGACATTGGTAACC | 19042 |
| gb:MT019530 | Organism:Severe | TGGTTGTTAAAGCTGCATTATTAGCAGACAAATCCCAGTTCCTCACGACATTGGTAACC | 19042 |
| gb:MT039888 | Organism:Severe | TGGTTGTTAAAGCTGCATTATTAGCAGACAAATCCCAGTTCCTCACGACATTGGTAACC | 19042 |
| gb:LC522972 | Organism:Severe | TGGTTGTTAAAGCTGCATTATTAGCAGACAAATCCCAGTTCCTCACGACATTGGTAACC | 19039 |
| gb:MT027063 | Organism:Severe | TGGTTGTTAAAGCTGCATTATTAGCAGACAAATCCCAGTTCCTCACGACATTGGTAACC | 19042 |
| gb:MT027062 | Organism:Severe | TGGTTGTTAAAGCTGCATTATTAGCAGACAAATCCCAGTTCCTCACGACATTGGTAACC | 19042 |
| gb:MT019529 | Organism:Severe | TGGTTGTTAAAGCTGCATTATTAGCAGACAAATCCCAGTTCCTCACGACATTGGTAACC | 19042 |
| gb:MN996529 | Organism:Severe | TGGTTGTTAAAGCTGCATTATTAGCAGACAAATCCCAGTTCCTCACGACATTGGTAACC | 19030 |
| gb:MN996531 | Organism:Severe | TGGTTGTTAAAGCTGCATTATTAGCAGACAAATCCCAGTTCCTCACGACATTGGTAACC | 19029 |
| gb:MT066176 | Organism:Severe | TGGTTGTTAAAGCTGCATTATTAGCAGACAAATCCCAGTTCCTCACGACATTGGTAACC | 19042 |
| gb:MT027064 | Organism:Severe | TGGTTGTTAAAGCTGCATTATTAGCAGACAAATCCCAGTTCCTCACGACATTGGTAACC | 19042 |
| gb:MN994468 | Organism:Severe | TGGTTGTTAAAGCTGCATTATTAGCAGACAAATCCCAGTTCCTCACGACATTGGTAACC | 19042 |
| gb:MT072688 | Organism:Severe | TGGTTGTTAAAGCTGCATTATTAGCAGACAAATCCCAGTTCCTCACGACATTGGTAACC | 19027 |
| gb:MN996527 | Organism:Severe | TGGTTGTTAAAGCTGCATTATTAGCAGACAAATCCCAGTTCCTCACGACATTGGTAACC | 19009 |
| gb:MT093631 | Organism:Severe | TGGTTGTTAAAGCTGCATTATTAGCAGACAAATCCCAGTTCCTCACGACATTGGTAACC | 19080 |
| gb:MT106053 | Organism:Severe | TGGTTGTTAAAGCTGCATTATTAGCAGACAAATCCCAGTTCCTCACGACATTGGTAACC | 19042 |
| gb:MT019533 | Organism:Severe | TGGTTGTTAAAGCTGCATTATTAGCAGACAAATCCCAGTTCCTCACGACATTGGTAACC | 19042 |

|             |                 |                                                             |       |
|-------------|-----------------|-------------------------------------------------------------|-------|
| gb:MT019531 | Organism:Severe | TGGTTGTTAAAGCTGCATTATTAGCAGACAAATCCCAGTTCCTCACGACATTGGTAACC | 19042 |
| gb:MN996528 | Organism:Severe | TGGTTGTTAAAGCTGCATTATTAGCAGACAAATCCCAGTTCCTCACGACATTGGTAACC | 19042 |
| gb:MN996530 | Organism:Severe | TGGTTGTTAAAGCTGCATTATTAGCAGACAAATCCCAGTTCCTCACGACATTGGTAACC | 19028 |
| gb:MN908947 | Organism:Severe | TGGTTGTTAAAGCTGCATTATTAGCAGACAAATCCCAGTTCCTCACGACATTGGTAACC | 19042 |
| gb:MT019532 | Organism:Severe | TGGTTGTTAAAGCTGCATTATTAGCAGACAAATCCCAGTTCCTCACGACATTGGTAACC | 19042 |

\*\*\*\*\*

|             |                 |                                                              |       |
|-------------|-----------------|--------------------------------------------------------------|-------|
| gb:MT020781 | Organism:Severe | CTAAAGCTATTAAGTGTGTACCTCAAGCTGATGTAGAATGGAAGTTCTATGATGCACAGC | 19090 |
| gb:MT007544 | Organism:Severe | CTAAAGCTATTAAGTGTGTACCCCAAGCTGATGTAGAATGGAAGTTCTATGATGCACAGC | 19102 |
| gb:MN994467 | Organism:Severe | CTAAAGCTATTAAGTGTGTACCTCAAGCTGATGTAGAATGGAAGTTCTATGATGCACAGC | 19102 |
| gb:MT044257 | Organism:Severe | CTAAAGCTATTAAGTGTGTACCTCAAGCTGATGTAGAATGGAAGTTCTATGATGCACAGC | 19102 |
| gb:MT106054 | Organism:Severe | CTAAAGCTATTAAGTGTGTACCTCAAGCTGATGTAGAATGGAAGTTCTATGATGCACAGC | 19102 |
| gb:MT049951 | Organism:Severe | CTAAAGCTATTAAGTGTGTACCTCAAGCTGATGTAGAATGGAAGTTCTATGATGCACAGC | 19102 |
| gb:MN975262 | Organism:Severe | CTAAAGCTATTAAGTGTGTACCTCAAGCTGATGTAGAATGGAAGTTCTATGATGCACAGC | 19102 |
| gb:MT106052 | Organism:Severe | CTAAAGCTATTAAGTGTGTACCTCAAGCTGATGTAGAATGGAAGTTCTATGATGCACAGC | 19102 |
| gb:LC522975 | Organism:Severe | CTAAAGCTATTAAGTGTGTACCTCAAGCTGATGTAGAATGGAAGTTCTATGATGCACAGC | 19099 |
| gb:LC522973 | Organism:Severe | CTAAAGCTATTAAGTGTGTACCTCAAGCTGATGTAGAATGGAAGTTCTATGATGCACAGC | 19099 |
| gb:LC522974 | Organism:Severe | CTAAAGCTATTAAGTGTGTACCTCAAGCTGATGTAGAATGGAAGTTCTATGATGCACAGC | 19099 |
| gb:MN985325 | Organism:Severe | CTAAAGCTATTAAGTGTGTACCTCAAGCTGATGTAGAATGGAAGTTCTATGATGCACAGC | 19102 |
| gb:MT020881 | Organism:Severe | CTAAAGCTATTAAGTGTGTACCTCAAGCTGATGTAGAATGGAAGTTCTATGATGCACAGC | 19102 |
| gb:MT020880 | Organism:Severe | CTAAAGCTATTAAGTGTGTACCTCAAGCTGATGTAGAATGGAAGTTCTATGATGCACAGC | 19102 |
| gb:MT066175 | Organism:Severe | CTAAAGCTATTAAGTGTGTACCTCAAGCTGATGTAGAATGGAAGTTCTATGATGCACAGC | 19102 |
| gb:MN997409 | Organism:Severe | CTAAAGCTATTAAGTGTGTACCTCAAGCTGATGTAGAATGGAAGTTCTATGATGCACAGC | 19102 |
| gb:MN938384 | Organism:Severe | CTAAAGCTATTAAGTGTGTACCTCAAGCTGATGTAGAATGGAAGTTCTATGATGCACAGC | 19070 |
| gb:MT044258 | Organism:Severe | CTAAAGCTATTAAGTGTGTACCTCAAGCTGATGTAGAATGGAAGTTCTATGATGCACAGC | 19078 |
| gb:MT039890 | Organism:Severe | CTAAAGCTATTAAGTGTGTACCTCAAGCTGATGTAGAATGGAAGTTCTATGATGCACAGC | 19102 |
| gb:MN988713 | Organism:Severe | CTAAAGCTATTAAGTGTGTACCTCAAGCTGATGTAGAATGGAAGTTCTATGATGCACAGC | 19102 |
| gb:LC521925 | Organism:Severe | CTAAAGCTATTAAGTGTGTACCTCAAGCTGATGTAGAATGGAAGTTCTATGATGCACAGC | 19075 |
| gb:MT093571 | Organism:Severe | CTAAAGCTATTAAGTGTGTACCTCAAGCTGATGTAGAATGGAAGTTCTATGATGCACAGC | 19102 |
| gb:MT039887 | Organism:Severe | CTAAAGCTATTAAGTGTGTACCTCAAGCTGATGTAGAATGGAAGTTCTATGATGCACAGC | 19102 |
| gb:MT019530 | Organism:Severe | CTAAAGCTATTAAGTGTGTACCTCAAGCTGATGTAGAATGGAAGTTCTATGATGCACAGC | 19102 |
| gb:MT039888 | Organism:Severe | CTAAAGCTATTAAGTGTGTACCTCAAGCTGATGTAGAATGGAAGTTCTATGATGCACAGC | 19102 |
| gb:LC522972 | Organism:Severe | CTAAAGCTATTAAGTGTGTACCTCAAGCTGATGTAGAATGGAAGTTCTATGATGCACAGC | 19099 |
| gb:MT027063 | Organism:Severe | CTAAAGCTATTAAGTGTGTACCTCAAGCTGATGTAGAATGGAAGTTCTATGATGCACAGC | 19102 |
| gb:MT027062 | Organism:Severe | CTAAAGCTATTAAGTGTGTACCTCAAGCTGATGTAGAATGGAAGTTCTATGATGCACAGC | 19102 |
| gb:MT019529 | Organism:Severe | CTAAAGCTATTAAGTGTGTACCTCAAGCTGATGTAGAATGGAAGTTCTATGATGCACAGC | 19102 |
| gb:MN996529 | Organism:Severe | CTAAAGCTATTAAGTGTGTACCTCAAGCTGATGTAGAATGGAAGTTCTATGATGCACAGC | 19090 |
| gb:MN996531 | Organism:Severe | CTAAAGCTATTAAGTGTGTACCTCAAGCTGATGTAGAATGGAAGTTCTATGATGCACAGC | 19089 |
| gb:MT066176 | Organism:Severe | CTAAAGCTATTAAGTGTGTACCTCAAGCTGATGTAGAATGGAAGTTCTATGATGCACAGC | 19102 |
| gb:MT027064 | Organism:Severe | CTAAAGCTATTAAGTGTGTACCTCAAGCTGATGTAGAATGGAAGTTCTATGATGCACAGC | 19102 |
| gb:MN994468 | Organism:Severe | CTAAAGCTATTAAGTGTGTACCTCAAGCTGATGTAGAATGGAAGTTCTATGATGCACAGC | 19102 |
| gb:MT072688 | Organism:Severe | CTAAAGCTATTAAGTGTGTACCTCAAGCTGATGTAGAATGGAAGTTCTATGATGCACAGC | 19087 |
| gb:MN996527 | Organism:Severe | CTAAAGCTATTAAGTGTGTACCTCAAGCTGATGTAGAATGGAAGTTCTATGATGCACAGC | 19069 |
| gb:MT093631 | Organism:Severe | CTAAAGCTATTAAGTGTGTACCTCAAGCTGATGTAGAATGGAAGTTCTATGATGCACAGC | 19140 |
| gb:MT106053 | Organism:Severe | CTAAAGCTATTAAGTGTGTACCTCAAGCTGATGTAGAATGGAAGTTCTATGATGCACAGC | 19102 |
| gb:MT019533 | Organism:Severe | CTAAAGCTATTAAGTGTGTACCTCAAGCTGATGTAGAATGGAAGTTCTATGATGCACAGC | 19102 |
| gb:MT019531 | Organism:Severe | CTAAAGCTATTAAGTGTGTACCTCAAGCTGATGTAGAATGGAAGTTCTATGATGCACAGC | 19102 |
| gb:MN996528 | Organism:Severe | CTAAAGCTATTAAGTGTGTACCTCAAGCTGATGTAGAATGGAAGTTCTATGATGCACAGC | 19102 |
| gb:MN996530 | Organism:Severe | CTAAAGCTATTAAGTGTGTACCTCAAGCTGATGTAGAATGGAAGTTCTATGATGCACAGC | 19088 |
| gb:MN908947 | Organism:Severe | CTAAAGCTATTAAGTGTGTACCTCAAGCTGATGTAGAATGGAAGTTCTATGATGCACAGC | 19102 |
| gb:MT019532 | Organism:Severe | CTAAAGCTATTAAGTGTGTACCTCAAGCTGATGTAGAATGGAAGTTCTATGATGCACAGC | 19102 |

\*\*\*\*\*

|             |                 |                                                             |       |
|-------------|-----------------|-------------------------------------------------------------|-------|
| gb:MT020781 | Organism:Severe | CTTGTAGTGACAAAGCTTATAAATAGAAGAATTATTCTATTCTTATGCCACACATTCTG | 19150 |
| gb:MT007544 | Organism:Severe | CTTGTAGTGACAAAGCTTATAAATAGAAGAATTATTCTATTCTTATGCCACACATTCTG | 19162 |
| gb:MN994467 | Organism:Severe | CTTGTAGTGACAAAGCTTATAAATAGAAGAATTATTCTATTCTTATGCCACACATTCTG | 19162 |
| gb:MT044257 | Organism:Severe | CTTGTAGTGACAAAGCTTATAAATAGAAGAATTATTCTATTCTTATGCCACACATTCTG | 19162 |
| gb:MT106054 | Organism:Severe | CTTGTAGTGACAAAGCTTATAAATAGAAGAATTATTCTATTCTTATGCCACACATTCTG | 19162 |
| gb:MT049951 | Organism:Severe | CTTGTAGTGACAAAGCTTATAAATAGAAGAATTATTCTATTCTTATGCCACACATTCTG | 19162 |
| gb:MN975262 | Organism:Severe | CTTGTAGTGACAAAGCTTATAAATAGAAGAATTATTCTATTCTTATGCCACACATTCTG | 19162 |
| gb:MT106052 | Organism:Severe | CTTGTAGTGACAAAGCTTATAAATAGAAGAATTATTCTATTCTTATGCCACACATTCTG | 19162 |
| gb:LC522975 | Organism:Severe | CTTGTAGTGACAAAGCTTATAAATAGAAGAATTATTCTATTCTTATGCCACACATTCTG | 19159 |
| gb:LC522973 | Organism:Severe | CTTGTAGTGACAAAGCTTATAAATAGAAGAATTATTCTATTCTTATGCCACACATTCTG | 19159 |
| gb:LC522974 | Organism:Severe | CTTGTAGTGACAAAGCTTATAAATAGAAGAATTATTCTATTCTTATGCCACACATTCTG | 19159 |
| gb:MN985325 | Organism:Severe | CTTGTAGTGACAAAGCTTATAAATAGAAGAATTATTCTATTCTTATGCCACACATTCTG | 19162 |

|             |                 |                                                              |       |
|-------------|-----------------|--------------------------------------------------------------|-------|
| gb:MT020881 | Organism:Severe | CTTGTAGTGACAAAGCTTATAAAATAGAAGAATTATTCTATTCTTATGCCACACATTCTG | 19162 |
| gb:MT020880 | Organism:Severe | CTTGTAGTGACAAAGCTTATAAAATAGAAGAATTATTCTATTCTTATGCCACACATTCTG | 19162 |
| gb:MT066175 | Organism:Severe | CTTGTAGTGACAAAGCTTATAAAATAGAAGAATTATTCTATTCTTATGCCACACATTCTG | 19162 |
| gb:MN997409 | Organism:Severe | CTTGTAGTGACAAAGCTTATAAAATAGAAGAATTATTCTATTCTTATGCCACACATTCTG | 19162 |
| gb:MN938384 | Organism:Severe | CTTGTAGTGACAAAGCTTATAAAATAGAAGAATTATTCTATTCTTATGCCACACATTCTG | 19130 |
| gb:MT044258 | Organism:Severe | CTTGTAGTGACAAAGCTTATAAAATAGAAGAATTATTCTATTCTTATGCCACACATTCTG | 19138 |
| gb:MT039890 | Organism:Severe | CTTGTAGTGACAAAGCTTATAAAATAGAAGAATTATTCTATTCTTATGCCACACATTCTG | 19162 |
| gb:MN988713 | Organism:Severe | CTTGTAGTGACAAAGCTTATAAAATAGAAGAATTATTCTATTCTTATGCCACACATTCTG | 19162 |
| gb:LC521925 | Organism:Severe | CTTGTAGTGACAAAGCTTATAAAATAGAAGAATTATTCTATTCTTATGCCACACATTCTG | 19135 |
| gb:MT093571 | Organism:Severe | CTTGTAGTGACAAAGCTTATAAAATAGAAGAATTATTCTATTCTTATGCCACACATTCTG | 19162 |
| gb:MT039887 | Organism:Severe | CTTGTAGTGACAAAGCTTATAAAATAGAAGAATTATTCTATTCTTATGCCACACATTCTG | 19162 |
| gb:MT019530 | Organism:Severe | CTTGTAGTGACAAAGCTTATAAAATAGAAGAATTATTCTATTCTTATGCCACACATTCTG | 19162 |
| gb:MT039888 | Organism:Severe | CTTGTAGTGACAAAGCTTATAAAATAGAAGAATTATTCTATTCTTATGCCACACATTCTG | 19162 |
| gb:LC522972 | Organism:Severe | CTTGTAGTGACAAAGCTTATAAAATAGAAGAATTATTCTATTCTTATGCCACACATTCTG | 19159 |
| gb:MT027063 | Organism:Severe | CTTGTAGTGACAAAGCTTATAAAATAGAAGAATTATTCTATTCTTATGCCACACATTCTG | 19162 |
| gb:MT027062 | Organism:Severe | CTTGTAGTGACAAAGCTTATAAAATAGAAGAATTATTCTATTCTTATGCCACACATTCTG | 19162 |
| gb:MT019529 | Organism:Severe | CTTGTAGTGACAAAGCTTATAAAATAGAAGAATTATTCTATTCTTATGCCACACATTCTG | 19162 |
| gb:MN996529 | Organism:Severe | CTTGTAGTGACAAAGCTTATAAAATAGAAGAATTATTCTATTCTTATGCCACACATTCTG | 19150 |
| gb:MN996531 | Organism:Severe | CTTGTAGTGACAAAGCTTATAAAATAGAAGAATTATTCTATTCTTATGCCACACATTCTG | 19149 |
| gb:MT066176 | Organism:Severe | CTTGTAGTGACAAAGCTTATAAAATAGAAGAATTATTCTATTCTTATGCCACACATTCTG | 19162 |
| gb:MT027064 | Organism:Severe | CTTGTAGTGACAAAGCTTATAAAATAGAAGAATTATTCTATTCTTATGCCACACATTCTG | 19162 |
| gb:MN994468 | Organism:Severe | CTTGTAGTGACAAAGCTTATAAAATAGAAGAATTATTCTATTCTTATGCCACACATTCTG | 19162 |
| gb:MT072688 | Organism:Severe | CTTGTAGTGACAAAGCTTATAAAATAGAAGAATTATTCTATTCTTATGCCACACATTCTG | 19147 |
| gb:MN996527 | Organism:Severe | CTTGTAGTGACAAAGCTTATAAAATAGAAGAATTATTCTATTCTTATGCCACACATTCTG | 19129 |
| gb:MT093631 | Organism:Severe | CTTGTAGTGACAAAGCTTATAAAATAGAAGAATTATTCTATTCTTATGCCACACATTCTG | 19200 |
| gb:MT106053 | Organism:Severe | CTTGTAGTGACAAAGCTTATAAAATAGAAGAATTATTCTATTCTTATGCCACACATTCTG | 19162 |
| gb:MT019533 | Organism:Severe | CTTGTAGTGACAAAGCTTATAAAATAGAAGAATTATTCTATTCTTATGCCACACATTCTG | 19162 |
| gb:MT019531 | Organism:Severe | CTTGTAGTGACAAAGCTTATAAAATAGAAGAATTATTCTATTCTTATGCCACACATTCTG | 19162 |
| gb:MN996528 | Organism:Severe | CTTGTAGTGACAAAGCTTATAAAATAGAAGAATTATTCTATTCTTATGCCACACATTCTG | 19162 |
| gb:MN996530 | Organism:Severe | CTTGTAGTGACAAAGCTTATAAAATAGAAGAATTATTCTATTCTTATGCCACACATTCTG | 19148 |
| gb:MN908947 | Organism:Severe | CTTGTAGTGACAAAGCTTATAAAATAGAAGAATTATTCTATTCTTATGCCACACATTCTG | 19162 |
| gb:MT019532 | Organism:Severe | CTTGTAGTGACAAAGCTTATAAAATAGAAGAATTATTCTATTCTTATGCCACACATTCTG | 19162 |

\*\*\*\*\*

|             |                 |                                                             |       |
|-------------|-----------------|-------------------------------------------------------------|-------|
| gb:MT020781 | Organism:Severe | ACAAATTCACAGATGGTGTATGCCTATTTTGAATTGCAATGTCGATAGATATCCTGCTA | 19210 |
| gb:MT007544 | Organism:Severe | ACAAATTCACAGATGGTGTATGCCTATTTTGAATTGCAATGTCGATAGATATCCTGCTA | 19222 |
| gb:MN994467 | Organism:Severe | ACAAATTCACAGATGGTGTATGCCTATTTTGAATTGCAATGTCGATAGATATCCTGCTA | 19222 |
| gb:MT044257 | Organism:Severe | ACAAATTCACAGATGGTGTATGCCTATTTTGAATTGCAATGTCGATAGATATCCTGCTA | 19222 |
| gb:MT106054 | Organism:Severe | ACAAATTCACAGCTGGTGTATGCCTATTTTGAATTGCAATGTCGATAGATATCCTGCTA | 19222 |
| gb:MT049951 | Organism:Severe | ACAAATTCACAGATGGTGTATGCCTATTTTGAATTGCAATGTCGATAGATATCCTGCTA | 19222 |
| gb:MN975262 | Organism:Severe | ACAAATTCACAGATGGTGTATGCCTATTTTGAATTGCAATGTCGATAGATATCCTGCTA | 19222 |
| gb:MT106052 | Organism:Severe | ACAAATTCACAGATGGTGTATGCCTATTTTGAATTGCAATGTCGATAGATATCCTGCTA | 19222 |
| gb:LC522975 | Organism:Severe | ACAAATTCACAGATGGTGTATGCCTATTTTGAATTGCAATGTCGATAGATATCCTGCTA | 19219 |
| gb:LC522973 | Organism:Severe | ACAAATTCACAGATGGTGTATGCCTATTTTGAATTGCAATGTCGATAGATATCCTGCTA | 19219 |
| gb:LC522974 | Organism:Severe | ACAAATTCACAGATGGTGTATGCCTATTTTGAATTGCAATGTCGATAGATATCCTGCTA | 19219 |
| gb:MN985325 | Organism:Severe | ACAAATTCACAGATGGTGTATGCCTATTTTGAATTGCAATGTCGATAGATATCCTGCTA | 19222 |
| gb:MT020881 | Organism:Severe | ACAAATTCACAGATGGTGTATGCCTATTTTGAATTGCAATGTCGATAGATATCCTGCTA | 19222 |
| gb:MT020880 | Organism:Severe | ACAAATTCACAGATGGTGTATGCCTATTTTGAATTGCAATGTCGATAGATATCCTGCTA | 19222 |
| gb:MT066175 | Organism:Severe | ACAAATTCACAGATGGTGTATGCCTATTTTGAATTGCAATGTCGATAGATATCCTGCTA | 19222 |
| gb:MN997409 | Organism:Severe | ACAAATTCACAGATGGTGTATGCCTATTTTGAATTGCAATGTCGATAGATATCCTGCTA | 19222 |
| gb:MN938384 | Organism:Severe | ACAAATTCACAGATGGTGTATGCCTATTTTGAATTGCAATGTCGATAGATATCCTGCTA | 19190 |
| gb:MT044258 | Organism:Severe | ACAAATTCACAGATGGTGTATGCCTATTTTGAATTGCAATGTCGATAGATATCCTGCTA | 19198 |
| gb:MT039890 | Organism:Severe | ACAAATTCACAGATGGTGTATGCCTATTTTGAATTGCAATGTCGATAGATATCCTGCTA | 19222 |
| gb:MN988713 | Organism:Severe | ACAAATTCACAGATGGTGTATGCCTATTTTGAATTGCAATGTCGATAGATATCCTGCTA | 19222 |
| gb:LC521925 | Organism:Severe | ACAAATTCACAGATGGTGTATGCCTATTTTGAATTGCAATGTCGATAGATATCCTGCTA | 19195 |
| gb:MT093571 | Organism:Severe | ACAAATTCACAGATGGTGTATGCCTATTTTGAATTGCAATGTCGATAGATATCCTGCTA | 19222 |
| gb:MT039887 | Organism:Severe | ACAAATTCACAGATGGTGTATGCCTATTTTGAATTGCAATGTCGATAGATATCCTGCTA | 19222 |
| gb:MT019530 | Organism:Severe | ACAAATTCACAGATGGTGTATGCCTATTTTGAATTGCAATGTCGATAGATATCCTGCTA | 19222 |
| gb:MT039888 | Organism:Severe | ACAAATTCACAGATGGTGTATGCCTATTTTGAATTGCAATGTCGATAGATATCCTGCTA | 19222 |
| gb:LC522972 | Organism:Severe | ACAAATTCACAGATGGTGTATGCCTATTTTGAATTGCAATGTCGATAGATATCCTGCTA | 19219 |
| gb:MT027063 | Organism:Severe | ACAAATTCACAGATGGTGTATGCCTATTTTGAATTGCAATGTCGATAGATATCCTGCTA | 19222 |
| gb:MT027062 | Organism:Severe | ACAAATTCACAGATGGTGTATGCCTATTTTGAATTGCAATGTCGATAGATATCCTGCTA | 19222 |
| gb:MT019529 | Organism:Severe | ACAAATTCACAGATGGTGTATGCCTATTTTGAATTGCAATGTCGATAGATATCCTGCTA | 19222 |
| gb:MN996529 | Organism:Severe | ACAAATTCACAGATGGTGTATGCCTATTTTGAATTGCAATGTCGATAGATATCCTGCTA | 19210 |
| gb:MN996531 | Organism:Severe | ACAAATTCACAGATGGTGTATGCCTATTTTGAATTGCAATGTCGATAGATATCCTGCTA | 19209 |

|             |                 |                                                             |       |
|-------------|-----------------|-------------------------------------------------------------|-------|
| gb:MT066176 | Organism:Severe | ACAAATTCACAGATGGTGTATGCCTATTTTGAATTGCAATGTCGATAGATATCCTGCTA | 19222 |
| gb:MT027064 | Organism:Severe | ACAAATTCACAGATGGTGTATGCCTATTTTGAATTGCAATGTCGATAGATATCCTGCTA | 19222 |
| gb:MN994468 | Organism:Severe | ACAAATTCACAGATGGTGTATGCCTATTTTGAATTGCAATGTCGATAGATATCCTGCTA | 19222 |
| gb:MT072688 | Organism:Severe | ACAAATTCACAGATGGTGTATGCCTATTTTGAATTGCAATGTCGATAGATATCCTGCTA | 19207 |
| gb:MN996527 | Organism:Severe | ACAAATTCACAGATGGTGTATGCCTATTTTGAATTGCAATGTCGATAGATATCCTGCTA | 19189 |
| gb:MT093631 | Organism:Severe | ACAAATTCACAGATGGTGTATGCCTATTTTGAATTGCAATGTCGATAGATATCCTGCTA | 19260 |
| gb:MT106053 | Organism:Severe | ACAAATTCACAGATGGTGTATGCCTATTTTGAATTGCAATGTCGATAGATATCCTGCTA | 19222 |
| gb:MT019533 | Organism:Severe | ACAAATTCACAGATGGTGTATGCCTATTTTGAATTGCAATGTCGATAGATATCCTGCTA | 19222 |
| gb:MT019531 | Organism:Severe | ACAAATTCACAGATGGTGTATGCCTATTTTGAATTGCAATGTCGATAGATATCCTGCTA | 19222 |
| gb:MN996528 | Organism:Severe | ACAAATTCACAGATGGTGTATGCCTATTTTGAATTGCAATGTCGATAGATATCCTGCTA | 19222 |
| gb:MN996530 | Organism:Severe | ACAAATTCACAGATGGTGTATGCCTATTTTGAATTGCAATGTCGATAGATATCCTGCTA | 19208 |
| gb:MN908947 | Organism:Severe | ACAAATTCACAGATGGTGTATGCCTATTTTGAATTGCAATGTCGATAGATATCCTGCTA | 19222 |
| gb:MT019532 | Organism:Severe | ACAAATTCACAGATGGTGTATGCCTATTTTGAATTGCAATGTCGATAGATATCCTGCTA | 19222 |

\*\*\*\*\*

|             |                 |                                                             |       |
|-------------|-----------------|-------------------------------------------------------------|-------|
| gb:MT020781 | Organism:Severe | ATTCCATTGTTTGTAGATTTGACACTAGAGTGCTATCTAACCTTAACTGCCTGGTTGTG | 19270 |
| gb:MT007544 | Organism:Severe | ATTCCATTGTTTGTAGATTTGACACTAGAGTGCTATCTAACCTTAACTGCCTGGTTGTG | 19282 |
| gb:MN994467 | Organism:Severe | ATTCCATTGTTTGTAGATTTGACACTAGAGTGCTATCTAACCTTAACTGCCTGGTTGTG | 19282 |
| gb:MT044257 | Organism:Severe | ATTCCATTGTTTGTAGATTTGACACTAGAGTGCTATCTAACCTTAACTGCCTGGTTGTG | 19282 |
| gb:MT106054 | Organism:Severe | ATTCCATTGTTTGTAGATTTGACACTAGAGTGCTATCTAACCTTAACTGCCTGGTTGTG | 19282 |
| gb:MT049951 | Organism:Severe | ATTCCATTGTTTGTAGATTTGACACTAGAGTGCTATCTAACCTTAACTGCCTGGTTGTG | 19282 |
| gb:MN975262 | Organism:Severe | ATTCCATTGTTTGTAGATTTGACACTAGAGTGCTATCTAACCTTAACTGCCTGGTTGTG | 19282 |
| gb:MT106052 | Organism:Severe | ATTCCATTGTTTGTAGATTTGACACTAGAGTGCTATCTAACCTTAACTGCCTGGTTGTG | 19282 |
| gb:LC522975 | Organism:Severe | ATTCCATTGTTTGTAGATTTGACACTAGAGTGCTATCTAACCTTAACTGCCTGGTTGTG | 19279 |
| gb:LC522973 | Organism:Severe | ATTCCATTGTTTGTAGATTTGACACTAGAGTGCTATCTAACCTTAACTGCCTGGTTGTG | 19279 |
| gb:LC522974 | Organism:Severe | ATTCCATTGTTTGTAGATTTGACACTAGAGTGCTATCTAACCTTAACTGCCTGGTTGTG | 19279 |
| gb:MN985325 | Organism:Severe | ATTCCATTGTTTGTAGATTTGACACTAGAGTGCTATCTAACCTTAACTGCCTGGTTGTG | 19282 |
| gb:MT020881 | Organism:Severe | ATTCCATTGTTTGTAGATTTGACACTAGAGTGCTATCTAACCTTAACTGCCTGGTTGTG | 19282 |
| gb:MT020880 | Organism:Severe | ATTCCATTGTTTGTAGATTTGACACTAGAGTGCTATCTAACCTTAACTGCCTGGTTGTG | 19282 |
| gb:MT066175 | Organism:Severe | ATTCCATTGTTTGTAGATTTGACACTAGAGTGCTATCTAACCTTAACTGCCTGGTTGTG | 19282 |
| gb:MN997409 | Organism:Severe | ATTCCATTGTTTGTAGATTTGACACTAGAGTGCTATCTAACCTTAACTGCCTGGTTGTG | 19282 |
| gb:MN938384 | Organism:Severe | ATTCCATTGTTTGTAGATTTGACACTAGAGTGCTATCTAACCTTAACTGCCTGGTTGTG | 19250 |
| gb:MT044258 | Organism:Severe | ATTCCATTGTTTGTAGATTTGACACTAGAGTGCTATCTAACCTTAACTGCCTGGTTGTG | 19258 |
| gb:MT039890 | Organism:Severe | ATTCCATTGTTTGTAGATTTGACACTAGAGTGCTATCTAACCTTAACTGCCTGGTTGTG | 19282 |
| gb:MN988713 | Organism:Severe | ATTCCATTGTTTGTAGATTTGACACTAGAGTGCTATCTAACCTTAACTGCCTGGTTGTG | 19282 |
| gb:LC521925 | Organism:Severe | ATTCCATTGTTTGTAGATTTGACACTAGAGTGCTATCTAACCTTAACTGCCTGGTTGTG | 19255 |
| gb:MT093571 | Organism:Severe | ATTCCATTGTTTGTAGATTTGACACTAGAGTGCTATCTAACCTTAACTGCCTGGTTGTG | 19282 |
| gb:MT039887 | Organism:Severe | ATTCCATTGTTTGTAGATTTGACACTAGAGTGCTATCTAACCTTAACTGCCTGGTTGTG | 19282 |
| gb:MT019530 | Organism:Severe | ATTCCATTGTTTGTAGATTTGACACTAGAGTGCTATCTAACCTTAACTGCCTGGTTGTG | 19282 |
| gb:MT039888 | Organism:Severe | ATTCCATTGTTTGTAGATTTGACACTAGAGTGCTATCTAACCTTAACTGCCTGGTTGTG | 19282 |
| gb:LC522972 | Organism:Severe | ATTCCATTGTTTGTAGATTTGACACTAGAGTGCTATCTAACCTTAACTGCCTGGTTGTG | 19279 |
| gb:MT027063 | Organism:Severe | ATTCCATTGTTTGTAGATTTGACACTAGAGTGCTATCTAACCTTAACTGCCTGGTTGTG | 19282 |
| gb:MT027062 | Organism:Severe | ATTCCATTGTTTGTAGATTTGACACTAGAGTGCTATCTAACCTTAACTGCCTGGTTGTG | 19282 |
| gb:MT019529 | Organism:Severe | ATTCCATTGTTTGTAGATTTGACACTAGAGTGCTATCTAACCTTAACTGCCTGGTTGTG | 19282 |
| gb:MN996529 | Organism:Severe | ATTCCATTGTTTGTAGATTTGACACTAGAGTGCTATCTAACCTTAACTGCCTGGTTGTG | 19270 |
| gb:MN996531 | Organism:Severe | ATTCCATTGTTTGTAGATTTGACACTAGAGTGCTATCTAACCTTAACTGCCTGGTTGTG | 19269 |
| gb:MT066176 | Organism:Severe | ATTCCATTGTTTGTAGATTTGACACTAGAGTGCTATCTAACCTTAACTGCCTGGTTGTG | 19282 |
| gb:MT027064 | Organism:Severe | ATTCCATTGTTTGTAGATTTGACACTAGAGTGCTATCTAACCTTAACTGCCTGGTTGTG | 19282 |
| gb:MN994468 | Organism:Severe | ATTCCATTGTTTGTAGATTTGACACTAGAGTGCTATCTAACCTTAACTGCCTGGTTGTG | 19282 |
| gb:MT072688 | Organism:Severe | ATTCCATTGTTTGTAGATTTGACACTAGAGTGCTATCTAACCTTAACTGCCTGGTTGTG | 19267 |
| gb:MN996527 | Organism:Severe | ATTCCATTGTTTGTAGATTTGACACTAGAGTGCTATCTAACCTTAACTGCCTGGTTGTG | 19249 |
| gb:MT093631 | Organism:Severe | ATTCCATTGTTTGTAGATTTGACACTAGAGTGCTATCTAACCTTAACTGCCTGGTTGTG | 19320 |
| gb:MT106053 | Organism:Severe | ATTCCATTGTTTGTAGATTTGACACTAGAGTGCTATCTAACCTTAACTGCCTGGTTGTG | 19282 |
| gb:MT019533 | Organism:Severe | ATTCCATTGTTTGTAGATTTGACACTAGAGTGCTATCTAACCTTAACTGCCTGGTTGTG | 19282 |
| gb:MT019531 | Organism:Severe | ATTCCATTGTTTGTAGATTTGACACTAGAGTGCTATCTAACCTTAACTGCCTGGTTGTG | 19282 |
| gb:MN996528 | Organism:Severe | ATTCCATTGTTTGTAGATTTGACACTAGAGTGCTATCTAACCTTAACTGCCTGGTTGTG | 19282 |
| gb:MN996530 | Organism:Severe | ATTCCATTGTTTGTAGATTTGACACTAGAGTGCTATCTAACCTTAACTGCCTGGTTGTG | 19268 |
| gb:MN908947 | Organism:Severe | ATTCCATTGTTTGTAGATTTGACACTAGAGTGCTATCTAACCTTAACTGCCTGGTTGTG | 19282 |
| gb:MT019532 | Organism:Severe | ATTCCATTGTTTGTAGATTTGACACTAGAGTGCTATCTAACCTTAACTGCCTGGTTGTG | 19282 |

\*\*\*\*\*

|             |                 |                                                              |       |
|-------------|-----------------|--------------------------------------------------------------|-------|
| gb:MT020781 | Organism:Severe | ATGGTGGCAGTTTGTATGTAATAAACATGCATTCCACACACCAGCTTTTGATAAAAAGTG | 19330 |
| gb:MT007544 | Organism:Severe | ATGGTGGCAGTTTGTATGTAATAAACATGCATTCCACACACCAGCTTTTGATAAAAAGTG | 19342 |
| gb:MN994467 | Organism:Severe | ATGGTGGCAGTTTGTATGTAATAAACATGCATTCCACACACCAGCTTTTGATAAAAAGTG | 19342 |
| gb:MT044257 | Organism:Severe | ATGGTGGCAGTTTGTATGTAATAAACATGCATTCCACACACCAGCTTTTGATAAAAAGTG | 19342 |



|             |                 |                                                               |       |
|-------------|-----------------|---------------------------------------------------------------|-------|
| gb:MT019530 | Organism:Severe | CTTTTGTTAATTTAAAAACAATTACCATTTTTCTATTACTCTGACAGTCCATGTGAGTCTC | 19402 |
| gb:MT039888 | Organism:Severe | CTTTTGTTAATTTAAAAACAATTACCATTTTTCTATTACTCTGACAGTCCATGTGAGTCTC | 19402 |
| gb:LC522972 | Organism:Severe | CTTTTGTTAATTTAAAAACAATTACCATTTTTCTATTACTCTGACAGTCCATGTGAGTCTC | 19399 |
| gb:MT027063 | Organism:Severe | CTTTTGTTAATTTAAAAACAATTACCATTTTTCTATTACTCTGACAGTCCATGTGAGTCTC | 19402 |
| gb:MT027062 | Organism:Severe | CTTTTGTTAATTTAAAAACAATTACCATTTTTCTATTACTCTGACAGTCCATGTGAGTCTC | 19402 |
| gb:MT019529 | Organism:Severe | CTTTTGTTAATTTAAAAACAATTACCATTTTTCTATTACTCTGACAGTCCATGTGAGTCTC | 19402 |
| gb:MN996529 | Organism:Severe | CTTTTGTTAATTTAAAAACAATTACCATTTTTCTATTACTCTGACAGTCCATGTGAGTCTC | 19390 |
| gb:MN996531 | Organism:Severe | CTTTTGTTAATTTAAAAACAATTACCATTTTTCTATTACTCTGACAGTCCATGTGAGTCTC | 19389 |
| gb:MT066176 | Organism:Severe | CTTTTGTTAATTTAAAAACAATTACCATTTTTCTATTACTCTGACAGTCCATGTGAGTCTC | 19402 |
| gb:MT027064 | Organism:Severe | CTTTTGTTAATTTAAAAACAATTACCATTTTTCTATTACTCTGACAGTCCATGTGAGTCTC | 19402 |
| gb:MN994468 | Organism:Severe | CTTTTGTTAATTTAAAAACAATTACCATTTTTCTATTACTCTGACAGTCCATGTGAGTCTC | 19402 |
| gb:MT072688 | Organism:Severe | CTTTTGTTAATTTAAAAACAATTACCATTTTTCTATTACTCTGACAGTCCATGTGAGTCTC | 19387 |
| gb:MN996527 | Organism:Severe | CTTTTGTTAATTTAAAAACAATTACCATTTTTCTATTACTCTGACAGTCCATGTGAGTCTC | 19369 |
| gb:MT093631 | Organism:Severe | CTTTTGTTAATTTAAAAACAATTACCATTTTTCTATTACTCTGACAGTCCATGTGAGTCTC | 19440 |
| gb:MT106053 | Organism:Severe | CTTTTGTTAATTTAAAAACAATTACCATTTTTCTATTACTCTGACAGTCCATGTGAGTCTC | 19402 |
| gb:MT019533 | Organism:Severe | CTTTTGTTAATTTAAAAACAATTACCATTTTTCTATTACTCTGACAGTCCATGTGAGTCTC | 19402 |
| gb:MT019531 | Organism:Severe | CTTTTGTTAATTTAAAAACAATTACCATTTTTCTATTACTCTGACAGTCCATGTGAGTCTC | 19402 |
| gb:MN996528 | Organism:Severe | CTTTTGTTAATTTAAAAACAATTACCATTTTTCTATTACTCTGACAGTCCATGTGAGTCTC | 19402 |
| gb:MN996530 | Organism:Severe | CTTTTGTTAATTTAAAAACAATTACCATTTTTCTATTACTCTGACAGTCCATGTGAGTCTC | 19388 |
| gb:MN908947 | Organism:Severe | CTTTTGTTAATTTAAAAACAATTACCATTTTTCTATTACTCTGACAGTCCATGTGAGTCTC | 19402 |
| gb:MT019532 | Organism:Severe | CTTTTGTTAATTTAAAAACAATTACCATTTTTCTATTACTCTGACAGTCCATGTGAGTCTC | 19402 |

\*\*\*\*\*

|             |                 |                                                              |       |
|-------------|-----------------|--------------------------------------------------------------|-------|
| gb:MT020781 | Organism:Severe | ATGGAAAAAACAAGTAGTGTGATATAGATTATGTACCACTAAAGTCTGCTACGTGTATAA | 19450 |
| gb:MT007544 | Organism:Severe | ATGGAAAAAACAAGTAGTGTGATATAGATTATGTACCACTAAAGTCTGCTACGTGTATAA | 19462 |
| gb:MN994467 | Organism:Severe | ATGGAAAAAACAAGTAGTGTGATATAGATTATGTACCACTAAAGTCTGCTACGTGTATAA | 19462 |
| gb:MT044257 | Organism:Severe | ATGGAAAAAACAAGTAGTGTGATATAGATTATGTACCACTAAAGTCTGCTACGTGTATAA | 19462 |
| gb:MT106054 | Organism:Severe | ATGGAAAAAACAAGTAGTGTGATATAGATTATGTACCACTAAAGTCTGCTACGTGTATAA | 19462 |
| gb:MT049951 | Organism:Severe | ATGGAAAAAACAAGTAGTGTGATATAGATTATGTACCACTAAAGTCTGCTACGTGTATAA | 19462 |
| gb:MN975262 | Organism:Severe | ATGGAAAAAACAAGTAGTGTGATATAGATTATGTACCACTAAAGTCTGCTACGTGTATAA | 19462 |
| gb:MT106052 | Organism:Severe | ATGGAAAAAACAAGTAGTGTGATATAGATTATGTACCACTAAAGTCTGCTACGTGTATAA | 19462 |
| gb:LC522975 | Organism:Severe | ATGGAAAAAACAAGTAGTGTGATATAGATTATGTACCACTAAAGTCTGCTACGTGTATAA | 19459 |
| gb:LC522973 | Organism:Severe | ATGGAAAAAACAAGTAGTGTGATATAGATTATGTACCACTAAAGTCTGCTACGTGTATAA | 19459 |
| gb:LC522974 | Organism:Severe | ATGGAAAAAACAAGTAGTGTGATATAGATTATGTACCACTAAAGTCTGCTACGTGTATAA | 19459 |
| gb:MN985325 | Organism:Severe | ATGGAAAAAACAAGTAGTGTGATATAGATTATGTACCACTAAAGTCTGCTACGTGTATAA | 19462 |
| gb:MT020881 | Organism:Severe | ATGGAAAAAACAAGTAGTGTGATATAGATTATGTACCACTAAAGTCTGCTACGTGTATAA | 19462 |
| gb:MT020880 | Organism:Severe | ATGGAAAAAACAAGTAGTGTGATATAGATTATGTACCACTAAAGTCTGCTACGTGTATAA | 19462 |
| gb:MT066175 | Organism:Severe | ATGGAAAAAACAAGTAGTGTGATATAGATTATGTACCACTAAAGTCTGCTACGTGTATAA | 19462 |
| gb:MN997409 | Organism:Severe | ATGGAAAAAACAAGTAGTGTGATATAGATTATGTACCACTAAAGTCTGCTACGTGTATAA | 19462 |
| gb:MN938384 | Organism:Severe | ATGGAAAAAACAAGTAGTGTGATATAGATTATGTACCACTAAAGTCTGCTACGTGTATAA | 19430 |
| gb:MT044258 | Organism:Severe | ATGGAAAAAACAAGTAGTGTGATATAGATTATGTACCACTAAAGTCTGCTACGTGTATAA | 19438 |
| gb:MT039890 | Organism:Severe | ATGGAAAAAACAAGTAGTGTGATATAGATTATGTACCACTAAAGTCTGCTACGTGTATAA | 19462 |
| gb:MN988713 | Organism:Severe | ATGGAAAAAACAAGTAGTGTGATATAGATTATGTACCACTAAAGTCTGCTACGTGTATAA | 19462 |
| gb:LC521925 | Organism:Severe | ATGGAAAAAACAAGTAGTGTGATATAGATTATGTACCACTAAAGTCTGCTACGTGTATAA | 19435 |
| gb:MT093571 | Organism:Severe | ATGGAAAAAACAAGTAGTGTGATATAGATTATGTACCACTAAAGTCTGCTACGTGTATAA | 19462 |
| gb:MT039887 | Organism:Severe | ATGGAAAAAACAAGTAGTGTGATATAGATTATGTACCACTAAAGTCTGCTACGTGTATAA | 19462 |
| gb:MT019530 | Organism:Severe | ATGGAAAAAACAAGTAGTGTGATATAGATTATGTACCACTAAAGTCTGCTACGTGTATAA | 19462 |
| gb:MT039888 | Organism:Severe | ATGGAAAAAACAAGTAGTGTGATATAGATTATGTACCACTAAAGTCTGCTACGTGTATAA | 19462 |
| gb:LC522972 | Organism:Severe | ATGGAAAAAACAAGTAGTGTGATATAGATTATGTACCACTAAAGTCTGCTACGTGTATAA | 19459 |
| gb:MT027063 | Organism:Severe | ATGGAAAAAACAAGTAGTGTGATATAGATTATGTACCACTAAAGTCTGCTACGTGTATAA | 19462 |
| gb:MT027062 | Organism:Severe | ATGGAAAAAACAAGTAGTGTGATATAGATTATGTACCACTAAAGTCTGCTACGTGTATAA | 19462 |
| gb:MT019529 | Organism:Severe | ATGGAAAAAACAAGTAGTGTGATATAGATTATGTACCACTAAAGTCTGCTACGTGTATAA | 19462 |
| gb:MN996529 | Organism:Severe | ATGGAAAAAACAAGTAGTGTGATATAGATTATGTACCACTAAAGTCTGCTACGTGTATAA | 19450 |
| gb:MN996531 | Organism:Severe | ATGGAAAAAACAAGTAGTGTGATATAGATTATGTACCACTAAAGTCTGCTACGTGTATAA | 19449 |
| gb:MT066176 | Organism:Severe | ATGGAAAAAACAAGTAGTGTGATATAGATTATGTACCACTAAAGTCTGCTACGTGTATAA | 19462 |
| gb:MT027064 | Organism:Severe | ATGGAAAAAACAAGTAGTGTGATATAGATTATGTACCACTAAAGTCTGCTACGTGTATAA | 19462 |
| gb:MN994468 | Organism:Severe | ATGGAAAAAACAAGTAGTGTGATATAGATTATGTACCACTAAAGTCTGCTACGTGTATAA | 19462 |
| gb:MT072688 | Organism:Severe | ATGGAAAAAACAAGTAGTGTGATATAGATTATGTACCACTAAAGTCTGCTACGTGTATAA | 19447 |
| gb:MN996527 | Organism:Severe | ATGGAAAAAACAAGTAGTGTGATATAGATTATGTACCACTAAAGTCTGCTACGTGTATAA | 19429 |
| gb:MT093631 | Organism:Severe | ATGGAAAAAACAAGTAGTGTGATATAGATTATGTACCACTAAAGTCTGCTACGTGTATAA | 19500 |
| gb:MT106053 | Organism:Severe | ATGGAAAAAACAAGTAGTGTGATATAGATTATGTACCACTAAAGTCTGCTACGTGTATAA | 19462 |
| gb:MT019533 | Organism:Severe | ATGGAAAAAACAAGTAGTGTGATATAGATTATGTACCACTAAAGTCTGCTACGTGTATAA | 19462 |
| gb:MT019531 | Organism:Severe | ATGGAAAAAACAAGTAGTGTGATATAGATTATGTACCACTAAAGTCTGCTACGTGTATAA | 19462 |
| gb:MN996528 | Organism:Severe | ATGGAAAAAACAAGTAGTGTGATATAGATTATGTACCACTAAAGTCTGCTACGTGTATAA | 19462 |
| gb:MN996530 | Organism:Severe | ATGGAAAAAACAAGTAGTGTGATATAGATTATGTACCACTAAAGTCTGCTACGTGTATAA | 19448 |

|             |                 |                                                               |       |
|-------------|-----------------|---------------------------------------------------------------|-------|
| gb:MN908947 | Organism:Severe | ATGGAAAAACAAGTAGTGTCTAGACATAGATTATGTACCACTAAAGCTGCTACGTGTATAA | 19462 |
| gb:MT019532 | Organism:Severe | ATGGAAAAACAAGTAGTGTCTAGACATAGATTATGTACCACTAAAGCTGCTACGTGTATAA | 19462 |
| *****       |                 |                                                               |       |

|             |                 |                                                             |       |
|-------------|-----------------|-------------------------------------------------------------|-------|
| gb:MT020781 | Organism:Severe | CACGTTGCAATTTAGGTGGTGTCTGTCTAGACATCATGCTAATGAGTACAGATTGTATC | 19510 |
| gb:MT007544 | Organism:Severe | CACGTTGCAATTTAGGTGGTGTCTGTCTAGACATCATGCTAATGAGTACAGATTGTATC | 19522 |
| gb:MN994467 | Organism:Severe | CACGTTGCAATTTAGGTGGTGTCTGTCTAGACATCATGCTAATGAGTACAGATTGTATC | 19522 |
| gb:MT044257 | Organism:Severe | CACGTTGCAATTTAGGTGGTGTCTGTCTAGACATCATGCTAATGAGTACAGATTGTATC | 19522 |
| gb:MT106054 | Organism:Severe | CACGTTGCAATTTAGGTGGTGTCTGTCTAGACATCATGCTAATGAGTACAGATTGTATC | 19522 |
| gb:MT049951 | Organism:Severe | CACGTTGCAATTTAGGTGGTGTCTGTCTAGACATCATGCTAATGAGTACAGATTGTATC | 19522 |
| gb:MN975262 | Organism:Severe | CACGTTGCAATTTAGGTGGTGTCTGTCTAGACATCATGCTAATGAGTACAGATTGTATC | 19522 |
| gb:MT106052 | Organism:Severe | CACGTTGCAATTTAGGTGGTGTCTGTCTAGACATCATGCTAATGAGTACAGATTGTATC | 19522 |
| gb:LC522975 | Organism:Severe | CACGTTGCAATTTAGGTGGTGTCTGTCTAGACATCATGCTAATGAGTACAGATTGTATC | 19519 |
| gb:LC522973 | Organism:Severe | CACGTTGCAATTTAGGTGGTGTCTGTCTAGACATCATGCTAATGAGTACAGATTGTATC | 19519 |
| gb:LC522974 | Organism:Severe | CACGTTGCAATTTAGGTGGTGTCTGTCTAGACATCATGCTAATGAGTACAGATTGTATC | 19519 |
| gb:MN985325 | Organism:Severe | CACGTTGCAATTTAGGTGGTGTCTGTCTAGACATCATGCTAATGAGTACAGATTGTATC | 19522 |
| gb:MT020881 | Organism:Severe | CACGTTGCAATTTAGGTGGTGTCTGTCTAGACATCATGCTAATGAGTACAGATTGTATC | 19522 |
| gb:MT020880 | Organism:Severe | CACGTTGCAATTTAGGTGGTGTCTGTCTAGACATCATGCTAATGAGTACAGATTGTATC | 19522 |
| gb:MT066175 | Organism:Severe | CACGTTGCAATTTAGGTGGTGTCTGTCTAGACATCATGCTAATGAGTACAGATTGTATC | 19522 |
| gb:MN997409 | Organism:Severe | CACGTTGCAATTTAGGTGGTGTCTGTCTAGACATCATGCTAATGAGTACAGATTGTATC | 19522 |
| gb:MN938384 | Organism:Severe | CACGTTGCAATTTAGGTGGTGTCTGTCTAGACATCATGCTAATGAGTACAGATTGTATC | 19490 |
| gb:MT044258 | Organism:Severe | CACGTTGCAATTTAGGTGGTGTCTGTCTAGACATCATGCTAATGAGTACAGATTGTATC | 19498 |
| gb:MT039890 | Organism:Severe | CACGTTGCAATTTAGGTGGTGTCTGTCTAGACATCATGCTAATGAGTACAGATTGTATC | 19522 |
| gb:MN988713 | Organism:Severe | CACGTTGCAATTTAGGTGGTGTCTGTCTAGACATCATGCTAATGAGTACAGATTGTATC | 19522 |
| gb:LC521925 | Organism:Severe | CACGTTGCAATTTAGGTGGTGTCTGTCTAGACATCATGCTAATGAGTACAGATTGTATC | 19495 |
| gb:MT093571 | Organism:Severe | CACGTTGCAATTTAGGTGGTGTCTGTCTAGACATCATGCTAATGAGTACAGATTGTATC | 19522 |
| gb:MT039887 | Organism:Severe | CACGTTGCAATTTAGGTGGTGTCTGTCTAGACATCATGCTAATGAGTACAGATTGTATC | 19522 |
| gb:MT019530 | Organism:Severe | CACGTTGCAATTTAGGTGGTGTCTGTCTAGACATCATGCTAATGAGTACAGATTGTATC | 19522 |
| gb:MT039888 | Organism:Severe | CACGTTGCAATTTAGGTGGTGTCTGTCTAGACATCATGCTAATGAGTACAGATTGTATC | 19522 |
| gb:LC522972 | Organism:Severe | CACGTTGCAATTTAGGTGGTGTCTGTCTAGACATCATGCTAATGAGTACAGATTGTATC | 19519 |
| gb:MT027063 | Organism:Severe | CACGTTGCAATTTAGGTGGTGTCTGTCTAGACATCATGCTAATGAGTACAGATTGTATC | 19522 |
| gb:MT027062 | Organism:Severe | CACGTTGCAATTTAGGTGGTGTCTGTCTAGACATCATGCTAATGAGTACAGATTGTATC | 19522 |
| gb:MT019529 | Organism:Severe | CACGTTGCAATTTAGGTGGTGTCTGTCTAGACATCATGCTAATGAGTACAGATTGTATC | 19522 |
| gb:MN996529 | Organism:Severe | CACGTTGCAATTTAGGTGGTGTCTGTCTAGACATCATGCTAATGAGTACAGATTGTATC | 19510 |
| gb:MN996531 | Organism:Severe | CACGTTGCAATTTAGGTGGTGTCTGTCTAGACATCATGCTAATGAGTACAGATTGTATC | 19509 |
| gb:MT066176 | Organism:Severe | CACGTTGCAATTTAGGTGGTGTCTGTCTAGACATCATGCTAATGAGTACAGATTGTATC | 19522 |
| gb:MT027064 | Organism:Severe | CACGTTGCAATTTAGGTGGTGTCTGTCTAGACATCATGCTAATGAGTACAGATTGTATC | 19522 |
| gb:MN994468 | Organism:Severe | CACGTTGCAATTTAGGTGGTGTCTGTCTAGACATCATGCTAATGAGTACAGATTGTATC | 19522 |
| gb:MT072688 | Organism:Severe | CACGTTGCAATTTAGGTGGTGTCTGTCTAGACATCATGCTAATGAGTACAGATTGTATC | 19507 |
| gb:MN996527 | Organism:Severe | CACGTTGCAATTTAGGTGGTGTCTGTCTAGACATCATGCTAATGAGTACAGATTGTATC | 19489 |
| gb:MT093631 | Organism:Severe | CACGTTGCAATTTAGGTGGTGTCTGTCTAGACATCATGCTAATGAGTACAGATTGTATC | 19560 |
| gb:MT106053 | Organism:Severe | CACGTTGCAATTTAGGTGGTGTCTGTCTAGACATCATGCTAATGAGTACAGATTGTATC | 19522 |
| gb:MT019533 | Organism:Severe | CACGTTGCAATTTAGGTGGTGTCTGTCTAGACATCATGCTAATGAGTACAGATTGTATC | 19522 |
| gb:MT019531 | Organism:Severe | CACGTTGCAATTTAGGTGGTGTCTGTCTAGACATCATGCTAATGAGTACAGATTGTATC | 19522 |
| gb:MN996528 | Organism:Severe | CACGTTGCAATTTAGGTGGTGTCTGTCTAGACATCATGCTAATGAGTACAGATTGTATC | 19522 |
| gb:MN996530 | Organism:Severe | CACGTTGCAATTTAGGTGGTGTCTGTCTAGACATCATGCTAATGAGTACAGATTGTATC | 19508 |
| gb:MN908947 | Organism:Severe | CACGTTGCAATTTAGGTGGTGTCTGTCTAGACATCATGCTAATGAGTACAGATTGTATC | 19522 |
| gb:MT019532 | Organism:Severe | CACGTTGCAATTTAGGTGGTGTCTGTCTAGACATCATGCTAATGAGTACAGATTGTATC | 19522 |
| *****       |                 |                                                             |       |

|             |                 |                                                              |       |
|-------------|-----------------|--------------------------------------------------------------|-------|
| gb:MT020781 | Organism:Severe | TCGATGCTTATAACATGATGATCTCAGCTGGCTTTAGCTTGTGGGTTTACAAACAATTTG | 19570 |
| gb:MT007544 | Organism:Severe | TCGATGCTTATAACATGATGATCTCAGCTGGCTTTAGCTTGTGGGTTTACAAACAATTTG | 19582 |
| gb:MN994467 | Organism:Severe | TCGATGCTTATAACATGATGATCTCAGCTGGCTTTAGCTTGTGGGTTTACAAACAATTTG | 19582 |
| gb:MT044257 | Organism:Severe | TCGATGCTTATAACATGATGATCTCAGCTGGCTTTAGCTTGTGGGTTTACAAACAATTTG | 19582 |
| gb:MT106054 | Organism:Severe | TCGATGCTTATAACATGATGATCTCAGCTGGCTTTAGCTTGTGGGTTTACAAACAATTTG | 19582 |
| gb:MT049951 | Organism:Severe | TCGATGCTTATAACATGATGATCTCAGCTGGCTTTAGCTTGTGGGTTTACAAACAATTTG | 19582 |
| gb:MN975262 | Organism:Severe | TCGATGCTTATAACATGATGATCTCAGCTGGCTTTAGCTTGTGGGTTTACAAACAATTTG | 19582 |
| gb:MT106052 | Organism:Severe | TCGATGCTTATAACATGATGATCTCAGCTGGCTTTAGCTTGTGGGTTTACAAACAATTTG | 19582 |
| gb:LC522975 | Organism:Severe | TCGATGCTTATAACATGATGATCTCAGCTGGCTTTAGCTTGTGGGTTTACAAACAATTTG | 19579 |
| gb:LC522973 | Organism:Severe | TCGATGCTTATAACATGATGATCTCAGCTGGCTTTAGCTTGTGGGTTTACAAACAATTTG | 19579 |
| gb:LC522974 | Organism:Severe | TCGATGCTTATAACATGATGATCTCAGCTGGCTTTAGCTTGTGGGTTTACAAACAATTTG | 19579 |
| gb:MN985325 | Organism:Severe | TCGATGCTTATAACATGATGATCTCAGCTGGCTTTAGCTTGTGGGTTTACAAACAATTTG | 19582 |
| gb:MT020881 | Organism:Severe | TCGATGCTTATAACATGATGATCTCAGCTGGCTTTAGCTTGTGGGTTTACAAACAATTTG | 19582 |
| gb:MT020880 | Organism:Severe | TCGATGCTTATAACATGATGATCTCAGCTGGCTTTAGCTTGTGGGTTTACAAACAATTTG | 19582 |
| gb:MT066175 | Organism:Severe | TCGATGCTTATAACATGATGATCTCAGCTGGCTTTAGCTTGTGGGTTTACAAACAATTTG | 19582 |





|             |                 |                                                               |       |
|-------------|-----------------|---------------------------------------------------------------|-------|
| gb:MT072688 | Organism:Severe | ATACCTTATAACCTCTGGAACACTTTTACAAGACTTCAGAGTTTAGAAAATGTGGCTTTTA | 19627 |
| gb:MN996527 | Organism:Severe | ATACCTTATAACCTCTGGAACACTTTTACAAGACTTCAGAGTTTAGAAAATGTGGCTTTTA | 19609 |
| gb:MT093631 | Organism:Severe | ATACCTTATAACCTCTGGAACACTTTTACAAGACTTCAGAGTTTAGAAAATGTGGCTTTTA | 19680 |
| gb:MT106053 | Organism:Severe | ATACCTTATAACCTCTGGAACACTTTTACAAGACTTCAGAGTTTAGAAAATGTGGCTTTTA | 19642 |
| gb:MT019533 | Organism:Severe | ATACCTTATAACCTCTGGAACACTTTTACAAGACTTCAGAGTTTAGAAAATGTGGCTTTTA | 19642 |
| gb:MT019531 | Organism:Severe | ATACCTTATAACCTCTGGAACACTTTTACAAGACTTCAGAGTTTAGAAAATGTGGCTTTTA | 19642 |
| gb:MN996528 | Organism:Severe | ATACCTTATAACCTCTGGAACACTTTTACAAGACTTCAGAGTTTAGAAAATGTGGCTTTTA | 19642 |
| gb:MN996530 | Organism:Severe | ATACCTTATAACCTCTGGAACACTTTTACAAGACTTCAGAGTTTAGAAAATGTGGCTTTTA | 19628 |
| gb:MN908947 | Organism:Severe | ATACCTTATAACCTCTGGAACACTTTTACAAGACTTCAGAGTTTAGAAAATGTGGCTTTTA | 19642 |
| gb:MT019532 | Organism:Severe | ATACCTTATAACCTCTGGAACACTTTTACAAGACTTCAGAGTTTAGAAAATGTGGCTTTTA | 19642 |

\*\*\*\*\*

|             |                 |                                                            |       |
|-------------|-----------------|------------------------------------------------------------|-------|
| gb:MT020781 | Organism:Severe | ATGTTGTAATAAGGGACACTTTGATGGACAACAGGGTGAAGTACCAGTTTCTATCATT | 19690 |
| gb:MT007544 | Organism:Severe | ATGTTGTAATAAGGGACACTTTGATGGACAACAGGGTGAAGTACCAGTTTCTATCATT | 19702 |
| gb:MN994467 | Organism:Severe | ATGTTGTAATAAGGGACACTTTGATGGACAACAGGGTGAAGTACCAGTTTCTATCATT | 19702 |
| gb:MT044257 | Organism:Severe | ATGTTGTAATAAGGGACACTTTGATGGACAACAGGGTGAAGTACCAGTTTCTATCATT | 19702 |
| gb:MT106054 | Organism:Severe | ATGTTGTAATAAGGGACACTTTGATGGACAACAGGGTGAAGTACCAGTTTCTATCATT | 19702 |
| gb:MT049951 | Organism:Severe | ATGTTGTAATAAGGGACACTTTGATGGACAACAGGGTGAAGTACCAGTTTCTATCATT | 19702 |
| gb:MN975262 | Organism:Severe | ATGTTGTAATAAGGGACACTTTGATGGACAACAGGGTGAAGTACCAGTTTCTATCATT | 19702 |
| gb:MT106052 | Organism:Severe | ATGTTGTAATAAGGGACACTTTGATGGACAACAGGGTGAAGTACCAGTTTCTATCATT | 19702 |
| gb:LC522975 | Organism:Severe | ATGTTGTAATAAGGGACACTTTGATGGACAACAGGGTGAAGTACCAGTTTCTATCATT | 19699 |
| gb:LC522973 | Organism:Severe | ATGTTGTAATAAGGGACACTTTGATGGACAACAGGGTGAAGTACCAGTTTCTATCATT | 19699 |
| gb:LC522974 | Organism:Severe | ATGTTGTAATAAGGGACACTTTGATGGACAACAGGGTGAAGTACCAGTTTCTATCATT | 19699 |
| gb:MN985325 | Organism:Severe | ATGTTGTAATAAGGGACACTTTGATGGACAACAGGGTGAAGTACCAGTTTCTATCATT | 19702 |
| gb:MT020881 | Organism:Severe | ATGTTGTAATAAGGGACACTTTGATGGACAACAGGGTGAAGTACCAGTTTCTATCATT | 19702 |
| gb:MT020880 | Organism:Severe | ATGTTGTAATAAGGGACACTTTGATGGACAACAGGGTGAAGTACCAGTTTCTATCATT | 19702 |
| gb:MT066175 | Organism:Severe | ATGTTGTAATAAGGGACACTTTGATGGACAACAGGGTGAAGTACCAGTTTCTATCATT | 19702 |
| gb:MN997409 | Organism:Severe | ATGTTGTAATAAGGGACACTTTGATGGACAACAGGGTGAAGTACCAGTTTCTATCATT | 19702 |
| gb:MN938384 | Organism:Severe | ATGTTGTAATAAGGGACACTTTGATGGACAACAGGGTGAAGTACCAGTTTCTATCATT | 19670 |
| gb:MT044258 | Organism:Severe | ATGTTGTAATAAGGGACACTTTGATGGACAACAGGGTGAAGTACCAGTTTCTATCATT | 19678 |
| gb:MT039890 | Organism:Severe | ATGTTGTAATAAGGGACACTTTGATGGACAACAGGGTGAAGTACCAGTTTCTATCATT | 19702 |
| gb:MN988713 | Organism:Severe | ATGTTGTAATAAGGGACACTTTGATGGACAACAGGGTGAAGTACCAGTTTCTATCATT | 19702 |
| gb:LC521925 | Organism:Severe | ATGTTGTAATAAGGGACACTTTGATGGACAACAGGGTGAAGTACCAGTTTCTATCATT | 19675 |
| gb:MT093571 | Organism:Severe | ATGTTGTAATAAGGGACACTTTGATGGACAACAGGGTGAAGTACCAGTTTCTATCATT | 19702 |
| gb:MT039887 | Organism:Severe | ATGTTGTAATAAGGGACACTTTGATGGACAACAGGGTGAAGTACCAGTTTCTATCATT | 19702 |
| gb:MT019530 | Organism:Severe | ATGTTGTAATAAGGGACACTTTGATGGACAACAGGGTGAAGTACCAGTTTCTATCATT | 19702 |
| gb:MT039888 | Organism:Severe | ATGTTGTAATAAGGGACACTTTGATGGACAACAGGGTGAAGTACCAGTTTCTATCATT | 19702 |
| gb:LC522972 | Organism:Severe | ATGTTGTAATAAGGGACACTTTGATGGACAACAGGGTGAAGTACCAGTTTCTATCATT | 19699 |
| gb:MT027063 | Organism:Severe | ATGTTGTAATAAGGGACACTTTGATGGACAACAGGGTGAAGTACCAGTTTCTATCATT | 19702 |
| gb:MT027062 | Organism:Severe | ATGTTGTAATAAGGGACACTTTGATGGACAACAGGGTGAAGTACCAGTTTCTATCATT | 19702 |
| gb:MT019529 | Organism:Severe | ATGTTGTAATAAGGGACACTTTGATGGACAACAGGGTGAAGTACCAGTTTCTATCATT | 19702 |
| gb:MN996529 | Organism:Severe | ATGTTGTAATAAGGGACACTTTGATGGACAACAGGGTGAAGTACCAGTTTCTATCATT | 19690 |
| gb:MN996531 | Organism:Severe | ATGTTGTAATAAGGGACACTTTGATGGACAACAGGGTGAAGTACCAGTTTCTATCATT | 19689 |
| gb:MT066176 | Organism:Severe | ATGTTGTAATAAGGGACACTTTGATGGACAACAGGGTGAAGTACCAGTTTCTATCATT | 19702 |
| gb:MT027064 | Organism:Severe | ATGTTGTAATAAGGGACACTTTGATGGACAACAGGGTGAAGTACCAGTTTCTATCATT | 19702 |
| gb:MN994468 | Organism:Severe | ATGTTGTAATAAGGGACACTTTGATGGACAACAGGGTGAAGTACCAGTTTCTATCATT | 19702 |
| gb:MT072688 | Organism:Severe | ATGTTGTAATAAGGGACACTTTGATGGACAACAGGGTGAAGTACCAGTTTCTATCATT | 19687 |
| gb:MN996527 | Organism:Severe | ATGTTGTAATAAGGGACACTTTGATGGACAACAGGGTGAAGTACCAGTTTCTATCATT | 19669 |
| gb:MT093631 | Organism:Severe | ATGTTGTAATAAGGGACACTTTGATGGACAACAGGGTGAAGTACCAGTTTCTATCATT | 19740 |
| gb:MT106053 | Organism:Severe | ATGTTGTAATAAGGGACACTTTGATGGACAACAGGGTGAAGTACCAGTTTCTATCATT | 19702 |
| gb:MT019533 | Organism:Severe | ATGTTGTAATAAGGGACACTTTGATGGACAACAGGGTGAAGTACCAGTTTCTATCATT | 19702 |
| gb:MT019531 | Organism:Severe | ATGTTGTAATAAGGGACACTTTGATGGACAACAGGGTGAAGTACCAGTTTCTATCATT | 19702 |
| gb:MN996528 | Organism:Severe | ATGTTGTAATAAGGGACACTTTGATGGACAACAGGGTGAAGTACCAGTTTCTATCATT | 19702 |
| gb:MN996530 | Organism:Severe | ATGTTGTAATAAGGGACACTTTGATGGACAACAGGGTGAAGTACCAGTTTCTATCATT | 19688 |
| gb:MN908947 | Organism:Severe | ATGTTGTAATAAGGGACACTTTGATGGACAACAGGGTGAAGTACCAGTTTCTATCATT | 19702 |
| gb:MT019532 | Organism:Severe | ATGTTGTAATAAGGGACACTTTGATGGACAACAGGGTGAAGTACCAGTTTCTATCATT | 19702 |

\*\*\*\*\*

|             |                 |                                                            |       |
|-------------|-----------------|------------------------------------------------------------|-------|
| gb:MT020781 | Organism:Severe | ATAACACTGTTTACACAAAAGTTGATGGTGTGATGTAGAATTGTTTAAAATAAAACAA | 19750 |
| gb:MT007544 | Organism:Severe | ATAACACTGTTTACACAAAAGTTGATGGTGTGATGTAGAATTGTTTAAAATAAAACAA | 19762 |
| gb:MN994467 | Organism:Severe | ATAACACTGTTTACACAAAAGTTGATGGTGTGATGTAGAATTGTTTAAAATAAAACAA | 19762 |
| gb:MT044257 | Organism:Severe | ATAACACTGTTTACACAAAAGTTGATGGTGTGATGTAGAATTGTTTAAAATAAAACAA | 19762 |
| gb:MT106054 | Organism:Severe | ATAACACTGTTTACACAAAAGTTGATGGTGTGATGTAGAATTGTTTAAAATAAAACAA | 19762 |
| gb:MT049951 | Organism:Severe | ATAACACTGTTTACACAAAAGTTGATGGTGTGATGTAGAATTGTTTAAAATAAAACAA | 19762 |
| gb:MN975262 | Organism:Severe | ATAACACTGTTTACACAAAAGTTGATGGTGTGATGTAGAATTGTTTAAAATAAAACAA | 19762 |



|             |                 |                                                             |       |
|-------------|-----------------|-------------------------------------------------------------|-------|
| gb:MT027063 | Organism:Severe | CATTACCTGTTAATGTAGCATTTGAGCTTTGGGCTAAGCGCAACATTAACCAGTACCAG | 19822 |
| gb:MT027062 | Organism:Severe | CATTACCTGTTAATGTAGCATTTGAGCTTTGGGCTAAGCGCAACATTAACCAGTACCAG | 19822 |
| gb:MT019529 | Organism:Severe | CATTACCTGTTAATGTAGCATTTGAGCTTTGGGCTAAGCGCAACATTAACCAGTACCAG | 19822 |
| gb:MN996529 | Organism:Severe | CATTACCTGTTAATGTAGCATTTGAGCTTTGGGCTAAGCGCAACATTAACCAGTACCAG | 19810 |
| gb:MN996531 | Organism:Severe | CATTACCTGTTAATGTAGCATTTGAGCTTTGGGCTAAGCGCAACATTAACCAGTACCAG | 19809 |
| gb:MT066176 | Organism:Severe | CATTACCTGTTAATGTAGCATTTGAGCTTTGGGCTAAGCGCAACATTAACCAGTACCAG | 19822 |
| gb:MT027064 | Organism:Severe | CATTACCTGTTAATGTAGCATTTGAGCTTTGGGCTAAGCGCAACATTAACCAGTACCAG | 19822 |
| gb:MN994468 | Organism:Severe | CATTACCTGTTAATGTAGCATTTGAGCTTTGGGCTAAGCGCAACATTAACCAGTACCAG | 19822 |
| gb:MT072688 | Organism:Severe | CATTACCTGTTAATGTAGCATTTGAGCTTTGGGCTAAGCGCAACATTAACCAGTACCAG | 19807 |
| gb:MN996527 | Organism:Severe | CATTACCTGTTAATGTAGCATTTGAGCTTTGGGCTAAGCGCAACATTAACCAGTACCAG | 19789 |
| gb:MT093631 | Organism:Severe | CATTACCTGTTAATGTAGCATTTGAGCTTTGGGCTAAGCGCAACATTAACCAGTACCAG | 19860 |
| gb:MT106053 | Organism:Severe | CATTACCTGTTAATGTAGCATTTGAGCTTTGGGCTAAGCGCAACATTAACCAGTACCAG | 19822 |
| gb:MT019533 | Organism:Severe | CATTACCTGTTAATGTAGCATTTGAGCTTTGGGCTAAGCGCAACATTAACCAGTACCAG | 19822 |
| gb:MT019531 | Organism:Severe | CATTACCTGTTAATGTAGCATTTGAGCTTTGGGCTAAGCGCAACATTAACCAGTACCAG | 19822 |
| gb:MN996528 | Organism:Severe | CATTACCTGTTAATGTAGCATTTGAGCTTTGGGCTAAGCGCAACATTAACCAGTACCAG | 19822 |
| gb:MN996530 | Organism:Severe | CATTACCTGTTAATGTAGCATTTGAGCTTTGGGCTAAGCGCAACATTAACCAGTACCAG | 19808 |
| gb:MN908947 | Organism:Severe | CATTACCTGTTAATGTAGCATTTGAGCTTTGGGCTAAGCGCAACATTAACCAGTACCAG | 19822 |
| gb:MT019532 | Organism:Severe | CATTACCTGTTAATGTAGCATTTGAGCTTTGGGCTAAGCGCAACATTAACCAGTACCAG | 19822 |

\*\*\*\*\*

|             |                 |                                                              |       |
|-------------|-----------------|--------------------------------------------------------------|-------|
| gb:MT020781 | Organism:Severe | AGGTGAAAATACTCAATAATTTGGGTGTGGACATTGCTGCTAATACTGTGATCTGGGACT | 19870 |
| gb:MT007544 | Organism:Severe | AGGTGAAAATACTCAATAATTTGGGTGTGGACATTGCTGCTAATACTGTGATCTGGGACT | 19882 |
| gb:MN994467 | Organism:Severe | AGGTGAAAATACTCAATAATTTGGGTGTGGACATTGCTGCTAATACTGTGATCTGGGACT | 19882 |
| gb:MT044257 | Organism:Severe | AGGTGAAAATACTCAATAATTTGGGTGTGGACATTGCTGCTAATACTGTGATCTGGGACT | 19882 |
| gb:MT106054 | Organism:Severe | AGGTGAAAATACTCAATAATTTGGGTGTGGACATTGCTGCTAATACTGTGATCTGGGACT | 19882 |
| gb:MT049951 | Organism:Severe | AGGTGAAAATACTCAATAATTTGGGTGTGGACATTGCTGCTAATACTGTGATCTGGGACT | 19882 |
| gb:MN975262 | Organism:Severe | AGGTGAAAATACTCAATAATTTGGGTGTGGACATTGCTGCTAATACTGTGATCTGGGACT | 19882 |
| gb:MT106052 | Organism:Severe | AGGTGAAAATACTCAATAATTTGGGTGTGGACATTGCTGCTAATACTGTGATCTGGGACT | 19882 |
| gb:LC522975 | Organism:Severe | AGGTGAAAATACTCAATAATTTGGGTGTGGACATTGCTGCTAATACTGTGATCTGGGACT | 19879 |
| gb:LC522973 | Organism:Severe | AGGTGAAAATACTCAATAATTTGGGTGTGGACATTGCTGCTAATACTGTGATCTGGGACT | 19879 |
| gb:LC522974 | Organism:Severe | AGGTGAAAATACTCAATAATTTGGGTGTGGACATTGCTGCTAATACTGTGATCTGGGACT | 19879 |
| gb:MN985325 | Organism:Severe | AGGTGAAAATACTCAATAATTTGGGTGTGGACATTGCTGCTAATACTGTGATCTGGGACT | 19882 |
| gb:MT020881 | Organism:Severe | AGGTGAAAATACTCAATAATTTGGGTGTGGACATTGCTGCTAATACTGTGATCTGGGACT | 19882 |
| gb:MT020880 | Organism:Severe | AGGTGAAAATACTCAATAATTTGGGTGTGGACATTGCTGCTAATACTGTGATCTGGGACT | 19882 |
| gb:MT066175 | Organism:Severe | AGGTGAAAATACTCAATAATTTGGGTGTGGACATTGCTGCTAATACTGTGATCTGGGACT | 19882 |
| gb:MN997409 | Organism:Severe | AGGTGAAAATACTCAATAATTTGGGTGTGGACATTGCTGCTAATACTGTGATCTGGGACT | 19882 |
| gb:MN938384 | Organism:Severe | AGGTGAAAATACTCAATAATTTGGGTGTGGACATTGCTGCTAATACTGTGATCTGGGACT | 19850 |
| gb:MT044258 | Organism:Severe | AGGTGAAAATACTCAATAATTTGGGTGTGGACATTGCTGCTAATACTGTGATCTGGGACT | 19858 |
| gb:MT039890 | Organism:Severe | AGGTGAAAATACTCAATAATTTGGGTGTGGACATTGCTGCTAATACTGTGATCTGGGACT | 19882 |
| gb:MN988713 | Organism:Severe | AGGTGAAAATACTCAATAATTTGGGTGTGGACATTGCTGCTAATACTGTGATCTGGGACT | 19882 |
| gb:LC521925 | Organism:Severe | AGGTGAAAATACTCAATAATTTGGGTGTGGACATTGCTGCTAATACTGTGATCTGGGACT | 19855 |
| gb:MT093571 | Organism:Severe | AGGTGAAAATACTCAATAATTTGGGTGTGGACATTGCTGCTAATACTGTGATCTGGGACT | 19882 |
| gb:MT039887 | Organism:Severe | AGGTGAAAATACTCAATAATTTGGGTGTGGACATTGCTGCTAATACTGTGATCTGGGACT | 19882 |
| gb:MT019530 | Organism:Severe | AGGTGAAAATACTCAATAATTTGGGTGTGGACATTGCTGCTAATACTGTGATCTGGGACT | 19882 |
| gb:MT039888 | Organism:Severe | AGGTGAAAATACTCAATAATTTGGGTGTGGACATTGCTGCTAATACTGTGATCTGGGACT | 19882 |
| gb:LC522972 | Organism:Severe | AGGTGAAAATACTCAATAATTTGGGTGTGGACATTGCTGCTAATACTGTGATCTGGGACT | 19879 |
| gb:MT027063 | Organism:Severe | AGGTGAAAATACTCAATAATTTGGGTGTGGACATTGCTGCTAATACTGTGATCTGGGACT | 19882 |
| gb:MT027062 | Organism:Severe | AGGTGAAAATACTCAATAATTTGGGTGTGGACATTGCTGCTAATACTGTGATCTGGGACT | 19882 |
| gb:MT019529 | Organism:Severe | AGGTGAAAATACTCAATAATTTGGGTGTGGACATTGCTGCTAATACTGTGATCTGGGACT | 19882 |
| gb:MN996529 | Organism:Severe | AGGTGAAAATACTCAATAATTTGGGTGTGGACATTGCTGCTAATACTGTGATCTGGGACT | 19870 |
| gb:MN996531 | Organism:Severe | AGGTGAAAATACTCAATAATTTGGGTGTGGACATTGCTGCTAATACTGTGATCTGGGACT | 19869 |
| gb:MT066176 | Organism:Severe | AGGTGAAAATACTCAATAATTTGGGTGTGGACATTGCTGCTAATACTGTGATCTGGGACT | 19882 |
| gb:MT027064 | Organism:Severe | AGGTGAAAATACTCAATAATTTGGGTGTGGACATTGCTGCTAATACTGTGATCTGGGACT | 19882 |
| gb:MN994468 | Organism:Severe | AGGTGAAAATACTCAATAATTTGGGTGTGGACATTGCTGCTAATACTGTGATCTGGGACT | 19882 |
| gb:MT072688 | Organism:Severe | AGGTGAAAATACTCAATAATTTGGGTGTGGACATTGCTGCTAATACTGTGATCTGGGACT | 19867 |
| gb:MN996527 | Organism:Severe | AGGTGAAAATACTCAATAATTTGGGTGTGGACATTGCTGCTAATACTGTGATCTGGGACT | 19849 |
| gb:MT093631 | Organism:Severe | AGGTGAAAATACTCAATAATTTGGGTGTGGACATTGCTGCTAATACTGTGATCTGGGACT | 19920 |
| gb:MT106053 | Organism:Severe | AGGTGAAAATACTCAATAATTTGGGTGTGGACATTGCTGCTAATACTGTGATCTGGGACT | 19882 |
| gb:MT019533 | Organism:Severe | AGGTGAAAATACTCAATAATTTGGGTGTGGACATTGCTGCTAATACTGTGATCTGGGACT | 19882 |
| gb:MT019531 | Organism:Severe | AGGTGAAAATACTCAATAATTTGGGTGTGGACATTGCTGCTAATACTGTGATCTGGGACT | 19882 |
| gb:MN996528 | Organism:Severe | AGGTGAAAATACTCAATAATTTGGGTGTGGACATTGCTGCTAATACTGTGATCTGGGACT | 19882 |
| gb:MN996530 | Organism:Severe | AGGTGAAAATACTCAATAATTTGGGTGTGGACATTGCTGCTAATACTGTGATCTGGGACT | 19868 |
| gb:MN908947 | Organism:Severe | AGGTGAAAATACTCAATAATTTGGGTGTGGACATTGCTGCTAATACTGTGATCTGGGACT | 19882 |
| gb:MT019532 | Organism:Severe | AGGTGAAAATACTCAATAATTTGGGTGTGGACATTGCTGCTAATACTGTGATCTGGGACT | 19882 |

\*\*\*\*\*

|             |                 |                                                                      |       |
|-------------|-----------------|----------------------------------------------------------------------|-------|
| gb:MT020781 | Organism:Severe | ACAAAAGAGATGCTCCAGCACATATATCTACTATTGGTGTGGTTCTATGACTGACATAG          | 19930 |
| gb:MT007544 | Organism:Severe | ACAAAAGAGATGCTCCAGCACATATATCTACTATTGGTGTGGTTCTATGACTGACATAG          | 19942 |
| gb:MN994467 | Organism:Severe | ACAAAAGAGATGCTCCAGCACATATATCTACTATTGGTGTGGTTCTATGACTGACATAG          | 19942 |
| gb:MT044257 | Organism:Severe | ACAAAAGAGATGCTCCAGCACATATATCTACTATTGGTGTGGTTCTATGACTGACATAG          | 19942 |
| gb:MT106054 | Organism:Severe | ACAAAAGAGATGCTCCAGCACATATATCTACTATTGGTGTGGTTCTATGACTGACATAG          | 19942 |
| gb:MT049951 | Organism:Severe | ACAAAAGAGATGCTCCAGCACATATATCTACTATTGGTGTGGTTCTATGACTGACATAG          | 19942 |
| gb:MN975262 | Organism:Severe | ACAAAAGAGATGCTCCAGCACATATATCTACTATTGGTGTGGTTCTATGACTGACATAG          | 19942 |
| gb:MT106052 | Organism:Severe | ACAAAAGAGATGCTCCAGCACATATATCTACTATTGGTGTGGTTCTATGACTGACATAG          | 19942 |
| gb:LC522975 | Organism:Severe | ACAAAAGAGATGCTCCAGCACATATATCTACTATTGGTGTGGTTCTATGACTGACATAG          | 19939 |
| gb:LC522973 | Organism:Severe | ACAAAAGAGATGCTCCAGCACATATATCTACTATTGGTGTGGTTCTATGACTGACATAG          | 19939 |
| gb:LC522974 | Organism:Severe | ACAAAAGAGATGCTCCAGCACATATATCTACTATTGGTGTGGTTCTATGACTGACATAG          | 19939 |
| gb:MN985325 | Organism:Severe | ACAAAAGAGATGCTCCAGCACATATATCTACTATTGGTGTGGTTCTATGACTGACATAG          | 19942 |
| gb:MT020881 | Organism:Severe | ACAAAAGAGATGCTCCAGCACATATATCTACTATTGGTGTGGTTCTATGACTGACATAG          | 19942 |
| gb:MT020880 | Organism:Severe | ACAAAAGAGATGCTCCAGCACATATATCTACTATTGGTGTGGTTCTATGACTGACATAG          | 19942 |
| gb:MT066175 | Organism:Severe | ACAAAAGAGATGCTCCAGCACATATATCTACTATTGGTGTGGTTCTATGACTGACATAG          | 19942 |
| gb:MN997409 | Organism:Severe | ACAAAAGAGATGCTCCAGCACATATATCTACTATTGGTGTGGTTCTATGACTGACATAG          | 19942 |
| gb:MN938384 | Organism:Severe | ACAAAAGAGATGCTCCAGCACATATATCTACTATTGGTGTGGTTCTATGACTGACATAG          | 19910 |
| gb:MT044258 | Organism:Severe | ACAAAAGAGATGCTCCAGCACATATATCTACTATTGGTGTGGTTCTATGACTGACATAG          | 19918 |
| gb:MT039890 | Organism:Severe | ACAAAAGAGATGCTCCAGCACATATATCTACTATTGGTGTGGTTCTATGACTGACATAG          | 19942 |
| gb:MN988713 | Organism:Severe | ACAAAAGAGATGCTCCAGCACATATATCTACTATTGGTGTGGTTCTATGACTGACATAG          | 19942 |
| gb:LC521925 | Organism:Severe | ACAAAAGAGATGCTCCAGCACATATATCTACTATTGGTGTGGTTCTATGACTGACATAG          | 19915 |
| gb:MT093571 | Organism:Severe | ACAAAAGAGATGCTCCAGCACATATATCTACTATTGGTGTGGTTCTATGACTGACATAG          | 19942 |
| gb:MT039887 | Organism:Severe | ACAAAAGAGATGCTCCAGCACATATATCTACTATTGGTGTGGTTCTATGACTGACATAG          | 19942 |
| gb:MT019530 | Organism:Severe | ACAAAAGAGATGCTCCAGCACATATATCTACTATTGGTGTGGTTCTATGACTGACATAG          | 19942 |
| gb:MT039888 | Organism:Severe | ACAAAAGAGATGCTCCAGCACATATATCTACTATTGGTGTGGTTCTATGACTGACATAG          | 19942 |
| gb:LC522972 | Organism:Severe | ACAAAAGAGATGCTCCAGCACATATATCTACTATTGGTGTGGTTCTATGACTGACATAG          | 19939 |
| gb:MT027063 | Organism:Severe | ACAAAAGAGATGCTCCAGCACATATATCTACTATTGGTGTGGTTCTATGACTGACATAG          | 19942 |
| gb:MT027062 | Organism:Severe | ACAAAAGAGATGCTCCAGCACATATATCTACTATTGGTGTGGTTCTATGACTGACATAG          | 19942 |
| gb:MT019529 | Organism:Severe | ACAAAAGAGATGCTCCAGCACATATATCTACTATTGGTGTGGTTCTATGACTGACATAG          | 19942 |
| gb:MN996529 | Organism:Severe | ACAAAAGAGATGCTCCAGCACATATATCTACTATTGGTGTGGTTCTATGACTGACATAG          | 19930 |
| gb:MN996531 | Organism:Severe | ACAAAAGAGATGCTCCAGCACATATATCTACTATTGGTGTGGTTCTATGACTGACATAG          | 19929 |
| gb:MT066176 | Organism:Severe | ACAAAAGAGATGCTCCAGCACATATATCTACTATTGGTGTGGTTCTATGACTGACATAG          | 19942 |
| gb:MT027064 | Organism:Severe | ACAAAAGAGATGCTCCAGCACATATATCTACTATTGGTGTGGTTCTATGACTGACATAG          | 19942 |
| gb:MN994468 | Organism:Severe | ACAAAAGAGATGCTCCAGCACATATATCTACTATTGGTGTGGTTCTATGACTGACATAG          | 19942 |
| gb:MT072688 | Organism:Severe | ACAAAAGAGATGCTCCAGCACATATATCTACTATTGGTGTGGTTCTATGACTGACATAG          | 19927 |
| gb:MN996527 | Organism:Severe | ACAAAAGAGATGCTCCAGCACATATATCTACTATTGGTGTGGTTCTATGACTGACATAG          | 19909 |
| gb:MT093631 | Organism:Severe | ACAAAAGAGATGCTCCAGCACATATATCTACTATTGGTGTGGTTCTATGACTGACATAG          | 19980 |
| gb:MT106053 | Organism:Severe | ACAAAAGAGATGCTCCAGCACATATATCTACTATTGGTGTGGTTCTATGACTGACATAG          | 19942 |
| gb:MT019533 | Organism:Severe | ACAAAAGAGATGCTCCAGCACATATATCTACTATTGGTGTGGTTCTATGACTGACATAG          | 19942 |
| gb:MT019531 | Organism:Severe | ACAAAAGAGATGCTCCAGCACATATATCTACTATTGGTGTGGTTCTATGACTGACATAG          | 19942 |
| gb:MN996528 | Organism:Severe | ACAAAAGAGATGCTCCAGCACATATATCTACTATTGGTGTGGTTCTATGACTGACATAG          | 19942 |
| gb:MN996530 | Organism:Severe | ACAAAAGAGATGCTCCAGCACATATATCTACTATTGGTGTGGTTCTATGACTGACATAG          | 19928 |
| gb:MN908947 | Organism:Severe | ACAAAAGAGATGCTCCAGCACATATATCTACTATTGGTGTGGTTCTATGACTGACATAG          | 19942 |
| gb:MT019532 | Organism:Severe | ACAAAAGAGATGCTCCAGCACATATATCTACTATTGGTGTGGTTCTATGACTGACATAG<br>***** | 19942 |

|             |                 |                                                                |       |
|-------------|-----------------|----------------------------------------------------------------|-------|
| gb:MT020781 | Organism:Severe | CCAAGAAACCAACTGAAACGATTTGTGCACCACACTCACTGTCTTTTTTGATGGTAGAGTTG | 19990 |
| gb:MT007544 | Organism:Severe | CCAAGAAACCAACTGAAACGATTTGTGCACCACACTCACTGTCTTTTTTGATGGTAGAGTTG | 20002 |
| gb:MN994467 | Organism:Severe | CCAAGAAACCAACTGAAACGATTTGTGCACCACACTCACTGTCTTTTTTGATGGTAGAGTTG | 20002 |
| gb:MT044257 | Organism:Severe | CCAAGAAACCAACTGAAACGATTTGTGCACCACACTCACTGTCTTTTTTGATGGTAGAGTTG | 20002 |
| gb:MT106054 | Organism:Severe | CCAAGAAACCAACTGAAACGATTTGTGCACCACACTCACTGTCTTTTTTGATGGTAGAGTTG | 20002 |
| gb:MT049951 | Organism:Severe | CCAAGAAACCAACTGAAACGATTTGTGCACCACACTCACTGTCTTTTTTGATGGTAGAGTTG | 20002 |
| gb:MN975262 | Organism:Severe | CCAAGAAACCAACTGAAACGATTTGTGCACCACACTCACTGTCTTTTTTGATGGTAGAGTTG | 20002 |
| gb:MT106052 | Organism:Severe | CCAAGAAACCAACTGAAACGATTTGTGCACCACACTCACTGTCTTTTTTGATGGTAGAGTTG | 20002 |
| gb:LC522975 | Organism:Severe | CCAAGAAACCAACTGAAACGATTTGTGCACCACACTCACTGTCTTTTTTGATGGTAGAGTTG | 19999 |
| gb:LC522973 | Organism:Severe | CCAAGAAACCAACTGAAACGATTTGTGCACCACACTCACTGTCTTTTTTGATGGTAGAGTTG | 19999 |
| gb:LC522974 | Organism:Severe | CCAAGAAACCAACTGAAACGATTTGTGCACCACACTCACTGTCTTTTTTGATGGTAGAGTTG | 19999 |
| gb:MN985325 | Organism:Severe | CCAAGAAACCAACTGAAACGATTTGTGCACCACACTCACTGTCTTTTTTGATGGTAGAGTTG | 20002 |
| gb:MT020881 | Organism:Severe | CCAAGAAACCAACTGAAACGATTTGTGCACCACACTCACTGTCTTTTTTGATGGTAGAGTTG | 20002 |
| gb:MT020880 | Organism:Severe | CCAAGAAACCAACTGAAACGATTTGTGCACCACACTCACTGTCTTTTTTGATGGTAGAGTTG | 20002 |
| gb:MT066175 | Organism:Severe | CCAAGAAACCAACTGAAACGATTTGTGCACCACACTCACTGTCTTTTTTGATGGTAGAGTTG | 20002 |
| gb:MN997409 | Organism:Severe | CCAAGAAACCAACTGAAACGATTTGTGCACCACACTCACTGTCTTTTTTGATGGTAGAGTTG | 20002 |
| gb:MN938384 | Organism:Severe | CCAAGAAACCAACTGAAACGATTTGTGCACCACACTCACTGTCTTTTTTGATGGTAGAGTTG | 19970 |
| gb:MT044258 | Organism:Severe | CCAAGAAACCAACTGAAACGATTTGTGCACCACACTCACTGTCTTTTTTGATGGTAGAGTTG | 19978 |

|             |                 |                                                              |       |
|-------------|-----------------|--------------------------------------------------------------|-------|
| gb:MT039890 | Organism:Severe | CCAAGAAACCAACTGAAACGATTTGTGCACCCTACTGTCTTTTTTATGATGGTAGAGTTG | 20002 |
| gb:MN988713 | Organism:Severe | CCAAGAAACCAACTGAAACGATTTGTGCACCCTACTGTCTTTTTTATGATGGTAGAGTTG | 20002 |
| gb:LC521925 | Organism:Severe | CCAAGAAACCAACTGAAACGATTTGTGCACCCTACTGTCTTTTTTATGATGGTAGAGTTG | 19975 |
| gb:MT093571 | Organism:Severe | CCAAGAAACCAACTGAAACGATTTGTGCACCCTACTGTCTTTTTTATGATGGTAGAGTTG | 20002 |
| gb:MT039887 | Organism:Severe | CCAAGAAACCAACTGAAACGATTTGTGCACCCTACTGTCTTTTTTATGATGGTAGAGTTG | 20002 |
| gb:MT019530 | Organism:Severe | CCAAGAAACCAACTGAAACGATTTGTGCACCCTACTGTCTTTTTTATGATGGTAGAGTTG | 20002 |
| gb:MT039888 | Organism:Severe | CCAAGAAACCAACTGAAACGATTTGTGCACCCTACTGTCTTTTTTATGATGGTAGAGTTG | 20002 |
| gb:LC522972 | Organism:Severe | CCAAGAAACCAACTGAAACGATTTGTGCACCCTACTGTCTTTTTTATGATGGTAGAGTTG | 19999 |
| gb:MT027063 | Organism:Severe | CCAAGAAACCAACTGAAACGATTTGTGCACCCTACTGTCTTTTTTATGATGGTAGAGTTG | 20002 |
| gb:MT027062 | Organism:Severe | CCAAGAAACCAACTGAAACGATTTGTGCACCCTACTGTCTTTTTTATGATGGTAGAGTTG | 20002 |
| gb:MT019529 | Organism:Severe | CCAAGAAACCAACTGAAACGATTTGTGCACCCTACTGTCTTTTTTATGATGGTAGAGTTG | 20002 |
| gb:MN996529 | Organism:Severe | CCAAGAAACCAACTGAAACGATTTGTGCACCCTACTGTCTTTTTTATGATGGTAGAGTTG | 19990 |
| gb:MN996531 | Organism:Severe | CCAAGAAACCAACTGAAACGATTTGTGCACCCTACTGTCTTTTTTATGATGGTAGAGTTG | 19989 |
| gb:MT066176 | Organism:Severe | CCAAGAAACCAACTGAAACGATTTGTGCACCCTACTGTCTTTTTTATGATGGTAGAGTTG | 20002 |
| gb:MT027064 | Organism:Severe | CCAAGAAACCAACTGAAACGATTTGTGCACCCTACTGTCTTTTTTATGATGGTAGAGTTG | 20002 |
| gb:MN994468 | Organism:Severe | CCAAGAAACCAACTGAAACGATTTGTGCACCCTACTGTCTTTTTTATGATGGTAGAGTTG | 20002 |
| gb:MT072688 | Organism:Severe | CCAAGAAACCAACTGAAACGATTTGTGCACCCTACTGTCTTTTTTATGATGGTAGAGTTG | 19987 |
| gb:MN996527 | Organism:Severe | CCAAGAAACCAACTGAAACGATTTGTGCACCCTACTGTCTTTTTTATGATGGTAGAGTTG | 19969 |
| gb:MT093631 | Organism:Severe | CCAAGAAACCAACTGAAACGATTTGTGCACCCTACTGTCTTTTTTATGATGGTAGAGTTG | 20040 |
| gb:MT106053 | Organism:Severe | CCAAGAAACCAACTGAAACGATTTGTGCACCCTACTGTCTTTTTTATGATGGTAGAGTTG | 20002 |
| gb:MT019533 | Organism:Severe | CCAAGAAACCAACTGAAACGATTTGTGCACCCTACTGTCTTTTTTATGATGGTAGAGTTG | 20002 |
| gb:MT019531 | Organism:Severe | CCAAGAAACCAACTGAAACGATTTGTGCACCCTACTGTCTTTTTTATGATGGTAGAGTTG | 20002 |
| gb:MN996528 | Organism:Severe | CCAAGAAACCAACTGAAACGATTTGTGCACCCTACTGTCTTTTTTATGATGGTAGAGTTG | 20002 |
| gb:MN996530 | Organism:Severe | CCAAGAAACCAACTGAAACGATTTGTGCACCCTACTGTCTTTTTTATGATGGTAGAGTTG | 19988 |
| gb:MN908947 | Organism:Severe | CCAAGAAACCAACTGAAACGATTTGTGCACCCTACTGTCTTTTTTATGATGGTAGAGTTG | 20002 |
| gb:MT019532 | Organism:Severe | CCAAGAAACCAACTGAAACGATTTGTGCACCCTACTGTCTTTTTTATGATGGTAGAGTTG | 20002 |

\*\*\*\*\*

|             |                 |                                                             |       |
|-------------|-----------------|-------------------------------------------------------------|-------|
| gb:MT020781 | Organism:Severe | ATGGTCAAGTAGACTTATTTAGAAATGCCCGTAATGGTGTCTTATTACAGAAGGTAGTG | 20050 |
| gb:MT007544 | Organism:Severe | ATGGTCAAGTAGACTTATTTAGAAATGCCCGTAATGGTGTCTTATTACAGAAGGTAGTG | 20062 |
| gb:MN994467 | Organism:Severe | ATGGTCAAGTAGACTTATTTAGAAATGCCCGTAATGGTGTCTTATTACAGAAGGTAGTG | 20062 |
| gb:MT044257 | Organism:Severe | ATGGTCAAGTAGACTTATTTAGAAATGCCCGTAATGGTGTCTTATTACAGAAGGTAGTG | 20062 |
| gb:MT106054 | Organism:Severe | ATGGTCAAGTAGACTTATTTAGAAATGCCCGTAATGGTGTCTTATTACAGAAGGTAGTG | 20062 |
| gb:MT049951 | Organism:Severe | ATGGTCAAGTAGACTTATTTAGAAATGCCCGTAATGGTGTCTTATTACAGAAGGTAGTG | 20062 |
| gb:MN975262 | Organism:Severe | ATGGTCAAGTAGACTTATTTAGAAATGCCCGTAATGGTGTCTTATTACAGAAGGTAGTG | 20062 |
| gb:MT106052 | Organism:Severe | ATGGTCAAGTAGACTTATTTAGAAATGCCCGTAATGGTGTCTTATTACAGAAGGTAGTG | 20062 |
| gb:LC522975 | Organism:Severe | ATGGTCAAGTAGACTTATTTAGAAATGCCCGTAATGGTGTCTTATTACAGAAGGTAGTG | 20059 |
| gb:LC522973 | Organism:Severe | ATGGTCAAGTAGACTTATTTAGAAATGCCCGTAATGGTGTCTTATTACAGAAGGTAGTG | 20059 |
| gb:LC522974 | Organism:Severe | ATGGTCAAGTAGACTTATTTAGAAATGCCCGTAATGGTGTCTTATTACAGAAGGTAGTG | 20059 |
| gb:MN985325 | Organism:Severe | ATGGTCAAGTAGACTTATTTAGAAATGCCCGTAATGGTGTCTTATTACAGAAGGTAGTG | 20062 |
| gb:MT020881 | Organism:Severe | ATGGTCAAGTAGACTTATTTAGAAATGCCCGTAATGGTGTCTTATTACAGAAGGTAGTG | 20062 |
| gb:MT020880 | Organism:Severe | ATGGTCAAGTAGACTTATTTAGAAATGCCCGTAATGGTGTCTTATTACAGAAGGTAGTG | 20062 |
| gb:MT066175 | Organism:Severe | ATGGTCAAGTAGACTTATTTAGAAATGCCCGTAATGGTGTCTTATTACAGAAGGTAGTG | 20062 |
| gb:MN997409 | Organism:Severe | ATGGTCAAGTAGACTTATTTAGAAATGCCCGTAATGGTGTCTTATTACAGAAGGTAGTG | 20062 |
| gb:MN938384 | Organism:Severe | ATGGTCAAGTAGACTTATTTAGAAATGCCCGTAATGGTGTCTTATTACAGAAGGTAGTG | 20030 |
| gb:MT044258 | Organism:Severe | ATGGTCAAGTAGACTTATTTAGAAATGCCCGTAATGGTGTCTTATTACAGAAGGTAGTG | 20038 |
| gb:MT039890 | Organism:Severe | ATGGTCAAGTAGACTTATTTAGAAATGCCCGTAATGGTGTCTTATTACAGAAGGTAGTG | 20062 |
| gb:MN988713 | Organism:Severe | ATGGTCAAGTAGACTTATTTAGAAATGCCCGTAATGGTGTCTTATTACAGAAGGTAGTG | 20062 |
| gb:LC521925 | Organism:Severe | ATGGTCAAGTAGACTTATTTAGAAATGCCCGTAATGGTGTCTTATTACAGAAGGTAGTG | 20035 |
| gb:MT093571 | Organism:Severe | ATGGTCAAGTAGACTTATTTAGAAATGCCCGTAATGGTGTCTTATTACAGAAGGTAGTG | 20062 |
| gb:MT039887 | Organism:Severe | ATGGTCAAGTAGACTTATTTAGAAATGCCCGTAATGGTGTCTTATTACAGAAGGTAGTG | 20062 |
| gb:MT019530 | Organism:Severe | ATGGTCAAGTAGACTTATTTAGAAATGCCCGTAATGGTGTCTTATTACAGAAGGTAGTG | 20062 |
| gb:MT039888 | Organism:Severe | ATGGTCAAGTAGACTTATTTAGAAATGCCCGTAATGGTGTCTTATTACAGAAGGTAGTG | 20062 |
| gb:LC522972 | Organism:Severe | ATGGTCAAGTAGACTTATTTAGAAATGCCCGTAATGGTGTCTTATTACAGAAGGTAGTG | 20059 |
| gb:MT027063 | Organism:Severe | ATGGTCAAGTAGACTTATTTAGAAATGCCCGTAATGGTGTCTTATTACAGAAGGTAGTG | 20062 |
| gb:MT027062 | Organism:Severe | ATGGTCAAGTAGACTTATTTAGAAATGCCCGTAATGGTGTCTTATTACAGAAGGTAGTG | 20062 |
| gb:MT019529 | Organism:Severe | ATGGTCAAGTAGACTTATTTAGAAATGCCCGTAATGGTGTCTTATTACAGAAGGTAGTG | 20062 |
| gb:MN996529 | Organism:Severe | ATGGTCAAGTAGACTTATTTAGAAATGCCCGTAATGGTGTCTTATTACAGAAGGTAGTG | 20050 |
| gb:MN996531 | Organism:Severe | ATGGTCAAGTAGACTTATTTAGAAATGCCCGTAATGGTGTCTTATTACAGAAGGTAGTG | 20049 |
| gb:MT066176 | Organism:Severe | ATGGTCAAGTAGACTTATTTAGAAATGCCCGTAATGGTGTCTTATTACAGAAGGTAGTG | 20062 |
| gb:MT027064 | Organism:Severe | ATGGTCAAGTAGACTTATTTAGAAATGCCCGTAATGGTGTCTTATTACAGAAGGTAGTG | 20062 |
| gb:MN994468 | Organism:Severe | ATGGTCAAGTAGACTTATTTAGAAATGCCCGTAATGGTGTCTTATTACAGAAGGTAGTG | 20062 |
| gb:MT072688 | Organism:Severe | ATGGTCAAGTAGACTTATTTAGAAATGCCCGTAATGGTGTCTTATTACAGAAGGTAGTG | 20047 |
| gb:MN996527 | Organism:Severe | ATGGTCAAGTAGACTTATTTAGAAATGCCCGTAATGGTGTCTTATTACAGAAGGTAGTG | 20029 |
| gb:MT093631 | Organism:Severe | ATGGTCAAGTAGACTTATTTAGAAATGCCCGTAATGGTGTCTTATTACAGAAGGTAGTG | 20100 |

|             |                 |                                                             |       |
|-------------|-----------------|-------------------------------------------------------------|-------|
| gb:MT106053 | Organism:Severe | ATGGTCAAGTAGACTTATTTAGAAATGCCCGTAATGGTGTCTTATTACAGAAGGTAGTG | 20062 |
| gb:MT019533 | Organism:Severe | ATGGTCAAGTAGACTTATTTAGAAATGCCCGTAATGGTGTCTTATTACAGAAGGTAGTG | 20062 |
| gb:MT019531 | Organism:Severe | ATGGTCAAGTAGACTTATTTAGAAATGCCCGTAATGGTGTCTTATTACAGAAGGTAGTG | 20062 |
| gb:MN996528 | Organism:Severe | ATGGTCAAGTAGACTTATTTAGAAATGCCCGTAATGGTGTCTTATTACAGAAGGTAGTG | 20062 |
| gb:MN996530 | Organism:Severe | ATGGTCAAGTAGACTTATTTAGAAATGCCCGTAATGGTGTCTTATTACAGAAGGTAGTG | 20048 |
| gb:MN908947 | Organism:Severe | ATGGTCAAGTAGACTTATTTAGAAATGCCCGTAATGGTGTCTTATTACAGAAGGTAGTG | 20062 |
| gb:MT019532 | Organism:Severe | ATGGTCAAGTAGACTTATTTAGAAATGCCCGTAATGGTGTCTTATTACAGAAGGTAGTG | 20062 |

\*\*\*\*\*

|             |                 |                                                              |       |
|-------------|-----------------|--------------------------------------------------------------|-------|
| gb:MT020781 | Organism:Severe | TTAAAGGTTTACAACCATCTGTAGGTCCCAAACAAGCTAGTCTTAATGGAGTCACATTAA | 20110 |
| gb:MT007544 | Organism:Severe | TTAAAGGTTTACAACCATCTGTAGGTCCCAAACAAGCTAGTCTTAATGGAGTCACATTAA | 20122 |
| gb:MN994467 | Organism:Severe | TTAAAGGTTTACAACCATCTGTAGGTCCCAAACAAGCTAGTCTTAATGGAGTCACATTAA | 20122 |
| gb:MT044257 | Organism:Severe | TTAAAGGTTTACAACCATCTGTAGGTCCCAAACAAGCTAGTCTTAATGGAGTCACATTAA | 20122 |
| gb:MT106054 | Organism:Severe | TTAAAGGTTTACAACCATCTGTAGGTCCCAAACAAGCTAGTCTTAATGGAGTCACATTAA | 20122 |
| gb:MT049951 | Organism:Severe | TTAAAGGTTTACAACCATCTGTAGGTCCCAAACAAGCTAGTCTTAATGGAGTCACATTAA | 20122 |
| gb:MN975262 | Organism:Severe | TTAAAGGTTTACAACCATCTGTAGGTCCCAAACAAGCTAGTCTTAATGGAGTCACATTAA | 20122 |
| gb:MT106052 | Organism:Severe | TTAAAGGTTTACAACCATCTGTAGGTCCCAAACAAGCTAGTCTTAATGGAGTCACATTAA | 20122 |
| gb:LC522975 | Organism:Severe | TTAAAGGTTTACAACCATCTGTAGGTCCCAAACAAGCTAGTCTTAATGGAGTCACATTAA | 20119 |
| gb:LC522973 | Organism:Severe | TTAAAGGTTTACAACCATCTGTAGGTCCCAAACAAGCTAGTCTTAATGGAGTCACATTAA | 20119 |
| gb:LC522974 | Organism:Severe | TTAAAGGTTTACAACCATCTGTAGGTCCCAAACAAGCTAGTCTTAATGGAGTCACATTAA | 20119 |
| gb:MN985325 | Organism:Severe | TTAAAGGTTTACAACCATCTGTAGGTCCCAAACAAGCTAGTCTTAATGGAGTCACATTAA | 20122 |
| gb:MT020881 | Organism:Severe | TTAAAGGTTTACAACCATCTGTAGGTCCCAAACAAGCTAGTCTTAATGGAGTCACATTAA | 20122 |
| gb:MT020880 | Organism:Severe | TTAAAGGTTTACAACCATCTGTAGGTCCCAAACAAGCTAGTCTTAATGGAGTCACATTAA | 20122 |
| gb:MT066175 | Organism:Severe | TTAAAGGTTTACAACCATCTGTAGGTCCCAAACAAGCTAGTCTTAATGGAGTCACATTAA | 20122 |
| gb:MN997409 | Organism:Severe | TTAAAGGTTTACAACCATCTGTAGGTCCCAAACAAGCTAGTCTTAATGGAGTCACATTAA | 20122 |
| gb:MN938384 | Organism:Severe | TTAAAGGTTTACAACCATCTGTAGGTCCCAAACAAGCTAGTCTTAATGGAGTCACATTAA | 20090 |
| gb:MT044258 | Organism:Severe | TTAAAGGTTTACAACCATCTGTAGGTCCCAAACAAGCTAGTCTTAATGGAGTCACATTAA | 20098 |
| gb:MT039890 | Organism:Severe | TTAAAGGTTTACAACCATCTGTAGGTCCCAAACAAGCTAGTCTTAATGGAGTCACATTAA | 20122 |
| gb:MN988713 | Organism:Severe | TTAAAGGTTTACAACCATCTGTAGGTCCCAAACAAGCTAGTCTTAATGGAGTCACATTAA | 20122 |
| gb:LC521925 | Organism:Severe | TTAAAGGTTTACAACCATCTGTAGGTCCCAAACAAGCTAGTCTTAATGGAGTCACATTAA | 20095 |
| gb:MT093571 | Organism:Severe | TTAAAGGTTTACAACCATCTGTAGGTCCCAAACAAGCTAGTCTTAATGGAGTCACATTAA | 20122 |
| gb:MT039887 | Organism:Severe | TTAAAGGTTTACAACCATCTGTAGGTCCCAAACAAGCTAGTCTTAATGGAGTCACATTAA | 20122 |
| gb:MT019530 | Organism:Severe | TTAAAGGTTTACAACCATCTGTAGGTCCCAAACAAGCTAGTCTTAATGGAGTCACATTAA | 20122 |
| gb:MT039888 | Organism:Severe | TTAAAGGTTTACAACCATCTGTAGGTCCCAAACAAGCTAGTCTTAATGGAGTCACATTAA | 20122 |
| gb:LC522972 | Organism:Severe | TTAAAGGTTTACAACCATCTGTAGGTCCCAAACAAGCTAGTCTTAATGGAGTCACATTAA | 20119 |
| gb:MT027063 | Organism:Severe | TTAAAGGTTTACAACCATCTGTAGGTCCCAAACAAGCTAGTCTTAATGGAGTCACATTAA | 20122 |
| gb:MT027062 | Organism:Severe | TTAAAGGTTTACAACCATCTGTAGGTCCCAAACAAGCTAGTCTTAATGGAGTCACATTAA | 20122 |
| gb:MT019529 | Organism:Severe | TTAAAGGTTTACAACCATCTGTAGGTCCCAAACAAGCTAGTCTTAATGGAGTCACATTAA | 20122 |
| gb:MN996529 | Organism:Severe | TTAAAGGTTTACAACCATCTGTAGGTCCCAAACAAGCTAGTCTTAATGGAGTCACATTAA | 20110 |
| gb:MN996531 | Organism:Severe | TTAAAGGTTTACAACCATCTGTAGGTCCCAAACAAGCTAGTCTTAATGGAGTCACATTAA | 20109 |
| gb:MT066176 | Organism:Severe | TTAAAGGTTTACAACCATCTGTAGGTCCCAAACAAGCTAGTCTTAATGGAGTCACATTAA | 20122 |
| gb:MT027064 | Organism:Severe | TTAAAGGTTTACAACCATCTGTAGGTCCCAAACAAGCTAGTCTTAATGGAGTCACATTAA | 20122 |
| gb:MN994468 | Organism:Severe | TTAAAGGTTTACAACCATCTGTAGGTCCCAAACAAGCTAGTCTTAATGGAGTCACATTAA | 20122 |
| gb:MT072688 | Organism:Severe | TTAAAGGTTTACAACCATCTGTAGGTCCCAAACAAGCTAGTCTTAATGGAGTCACATTAA | 20107 |
| gb:MN996527 | Organism:Severe | TTAAAGGTTTACAACCATCTGTAGGTCCCAAACAAGCTAGTCTTAATGGAGTCACATTAA | 20089 |
| gb:MT093631 | Organism:Severe | TTAAAGGTTTACAACCATCTGTAGGTCCCAAACAAGCTAGTCTTAATGGAGTCACATTAA | 20160 |
| gb:MT106053 | Organism:Severe | TTAAAGGTTTACAACCATCTGTAGGTCCCAAACAAGCTAGTCTTAATGGAGTCACATTAA | 20122 |
| gb:MT019533 | Organism:Severe | TTAAAGGTTTACAACCATCTGTAGGTCCCAAACAAGCTAGTCTTAATGGAGTCACATTAA | 20122 |
| gb:MT019531 | Organism:Severe | TTAAAGGTTTACAACCATCTGTAGGTCCCAAACAAGCTAGTCTTAATGGAGTCACATTAA | 20122 |
| gb:MN996528 | Organism:Severe | TTAAAGGTTTACAACCATCTGTAGGTCCCAAACAAGCTAGTCTTAATGGAGTCACATTAA | 20122 |
| gb:MN996530 | Organism:Severe | TTAAAGGTTTACAACCATCTGTAGGTCCCAAACAAGCTAGTCTTAATGGAGTCACATTAA | 20108 |
| gb:MN908947 | Organism:Severe | TTAAAGGTTTACAACCATCTGTAGGTCCCAAACAAGCTAGTCTTAATGGAGTCACATTAA | 20122 |
| gb:MT019532 | Organism:Severe | TTAAAGGTTTACAACCATCTGTAGGTCCCAAACAAGCTAGTCTTAATGGAGTCACATTAA | 20122 |

\*\*\*\*\*

|             |                 |                                                            |       |
|-------------|-----------------|------------------------------------------------------------|-------|
| gb:MT020781 | Organism:Severe | TTGGAGAAGCCGTAAAAACACAGTTCATTATTATAAGAAAGTTGATGGTGTGTCCAAC | 20170 |
| gb:MT007544 | Organism:Severe | TTGGAGAAGCCGTAAAAACACAGTTCATTATTATAAGAAAGTTGATGGTGTGTCCAAC | 20182 |
| gb:MN994467 | Organism:Severe | TTGGAGAAGCCGTAAAAACACAGTTCATTATTATAAGAAAGTTGATGGTGTGTCCAAC | 20182 |
| gb:MT044257 | Organism:Severe | TTGGAGAAGCCGTAAAAACACAGTTCATTATTATAAGAAAGTTGATGGTGTGTCCAAC | 20182 |
| gb:MT106054 | Organism:Severe | TTGGAGAAGCCGTAAAAACACAGTTCATTATTATAAGAAAGTTGATGGTGTGTCCAAC | 20182 |
| gb:MT049951 | Organism:Severe | TTGGAGAAGCCGTAAAAACACAGTTCATTATTATAAGAAAGTTGATGGTGTGTCCAAC | 20182 |
| gb:MN975262 | Organism:Severe | TTGGAGAAGCCGTAAAAACACAGTTCATTATTATAAGAAAGTTGATGGTGTGTCCAAC | 20182 |
| gb:MT106052 | Organism:Severe | TTGGAGAAGCCGTAAAAACACAGTTCATTATTATAAGAAAGTTGATGGTGTGTCCAAC | 20182 |
| gb:LC522975 | Organism:Severe | TTGGAGAAGCCGTAAAAACACAGTTCATTATTATAAGAAAGTTGATGGTGTGTCCAAC | 20179 |
| gb:LC522973 | Organism:Severe | TTGGAGAAGCCGTAAAAACACAGTTCATTATTATAAGAAAGTTGATGGTGTGTCCAAC | 20179 |





|             |                 |                                                              |       |
|-------------|-----------------|--------------------------------------------------------------|-------|
| gb:MN996529 | Organism:Severe | AATTACCTGAAACTTACTTTACTCAGAGTAGAAATTTACAAGAATTTAAACCCAGGAGTC | 20230 |
| gb:MN996531 | Organism:Severe | AATTACCTGAAACTTACTTTACTCAGAGTAGAAATTTACAAGAATTTAAACCCAGGAGTC | 20229 |
| gb:MT066176 | Organism:Severe | AATTACCTGAAACTTACTTTACTCAGAGTAGAAATTTACAAGAATTTAAACCCAGGAGTC | 20242 |
| gb:MT027064 | Organism:Severe | AATTACCTGAAACTTACTTTACTCAGAGTAGAAATTTACAAGAATTTAAACCCAGGAGTC | 20242 |
| gb:MN994468 | Organism:Severe | AATTACCTGAAACTTACTTTACTCAGAGTAGAAATTTACAAGAATTTAAACCCAGGAGTC | 20242 |
| gb:MT072688 | Organism:Severe | AATTACCTGAAACTTACTTTACTCAGAGTAGAAATTTACAAGAATTTAAACCCAGGAGTC | 20227 |
| gb:MN996527 | Organism:Severe | AATTACCTGAAACTTACTTTACTCAGAGTAGAAATTTACAAGAATTTAAACCCAGGAGTC | 20209 |
| gb:MT093631 | Organism:Severe | AATTACCTGAAACTTACTTTACTCAGAGTAGAAATTTACAAGAATTTAAACCCAGGAGTC | 20280 |
| gb:MT106053 | Organism:Severe | AATTACCTGAAACTTACTTTACTCAGAGTAGAAATTTACAAGAATTTAAACCCAGGAGTC | 20242 |
| gb:MT019533 | Organism:Severe | AATTACCTGAAACTTACTTTACTCAGAGTAGAAATTTACAAGAATTTAAACCCAGGAGTC | 20242 |
| gb:MT019531 | Organism:Severe | AATTACCTGAAACTTACTTTACTCAGAGTAGAAATTTACAAGAATTTAAACCCAGGAGTC | 20242 |
| gb:MN996528 | Organism:Severe | AATTACCTGAAACTTACTTTACTCAGAGTAGAAATTTACAAGAATTTAAACCCAGGAGTC | 20242 |
| gb:MN996530 | Organism:Severe | AATTACCTGAAACTTACTTTACTCAGAGTAGAAATTTACAAGAATTTAAACCCAGGAGTC | 20228 |
| gb:MN908947 | Organism:Severe | AATTACCTGAAACTTACTTTACTCAGAGTAGAAATTTACAAGAATTTAAACCCAGGAGTC | 20242 |
| gb:MT019532 | Organism:Severe | AATTACCTGAAACTTACTTTACTCAGAGTAGAAATTTACAAGAATTTAAACCCAGGAGTC | 20242 |

\*\*\*\*\*

|             |                 |                                                              |       |
|-------------|-----------------|--------------------------------------------------------------|-------|
| gb:MT020781 | Organism:Severe | AAATGGAAATTGATTTCTTAGAATTAGCTATGGATGAATTCATTGAACGGTATAAATTAG | 20290 |
| gb:MT007544 | Organism:Severe | AAATGGAAATTGATTTCTTAGAATTAGCTATGGATGAATTCATTGAACGGTATAAATTAG | 20302 |
| gb:MN994467 | Organism:Severe | AAATGGAAATTGATTTCTTAGAATTAGCTATGGATGAATTCATTGAACGGTATAAATTAG | 20302 |
| gb:MT044257 | Organism:Severe | AAATGGAAATTGATTTCTTAGAATTAGCTATGGATGAATTCATTGAACGGTATAAATTAG | 20302 |
| gb:MT106054 | Organism:Severe | AAATGGAAATTGATTTCTTAGAATTAGCTATGGATGAATTCATTGAACGGTATAAATTAG | 20302 |
| gb:MT049951 | Organism:Severe | AAATGGAAATTGATTTCTTAGAATTAGCTATGGATGAATTCATTGAACGGTATAAATTAG | 20302 |
| gb:MN975262 | Organism:Severe | AAATGGAAATTGATTTCTTAGAATTAGCTATGGATGAATTCATTGAACGGTATAAATTAG | 20302 |
| gb:MT106052 | Organism:Severe | AAATGGAAATTGATTTCTTAGAATTAGCTATGGATGAATTCATTGAACGGTATAAATTAG | 20302 |
| gb:LC522975 | Organism:Severe | AAATGGAAATTGATTTCTTAGAATTAGCTATGGATGAATTCATTGAACGGTATAAATTAG | 20299 |
| gb:LC522973 | Organism:Severe | AAATGGAAATTGATTTCTTAGAATTAGCTATGGATGAATTCATTGAACGGTATAAATTAG | 20299 |
| gb:LC522974 | Organism:Severe | AAATGGAAATTGATTTCTTAGAATTAGCTATGGATGAATTCATTGAACGGTATAAATTAG | 20299 |
| gb:MN985325 | Organism:Severe | AAATGGAAATTGATTTCTTAGAATTAGCTATGGATGAATTCATTGAACGGTATAAATTAG | 20302 |
| gb:MT020881 | Organism:Severe | AAATGGAAATTGATTTCTTAGAATTAGCTATGGATGAATTCATTGAACGGTATAAATTAG | 20302 |
| gb:MT020880 | Organism:Severe | AAATGGAAATTGATTTCTTAGAATTAGCTATGGATGAATTCATTGAACGGTATAAATTAG | 20302 |
| gb:MT066175 | Organism:Severe | AAATGGAAATTGATTTCTTAGAATTAGCTATGGATGAATTCATTGAACGGTATAAATTAG | 20302 |
| gb:MN997409 | Organism:Severe | AAATGGAAATTGATTTCTTAGAATTAGCTATGGATGAATTCATTGAACGGTATAAATTAG | 20302 |
| gb:MN938384 | Organism:Severe | AAATGGAAATTGATTTCTTAGAATTAGCTATGGATGAATTCATTGAACGGTATAAATTAG | 20270 |
| gb:MT044258 | Organism:Severe | AAATGGAAATTGATTTCTTAGAATTAGCTATGGATGAATTCATTGAACGGTATAAATTAG | 20278 |
| gb:MT039890 | Organism:Severe | AAATGGAAATTGATTTCTTAGAATTAGCTATGGATGAATTCATTGAACGGTATAAATTAG | 20302 |
| gb:MN988713 | Organism:Severe | AAATGGAAATTGATTTCTTAGAATTAGCTATGGATGAATTCATTGAACGGTATAAATTAG | 20302 |
| gb:LC521925 | Organism:Severe | AAATGGAAATTGATTTCTTAGAATTAGCTATGGATGAATTCATTGAACGGTATAAATTAG | 20275 |
| gb:MT093571 | Organism:Severe | AAATGGAAATTGATTTCTTAGAATTAGCTATGGATGAATTCATTGAACGGTATAAATTAG | 20302 |
| gb:MT039887 | Organism:Severe | AAATGGAAATTGATTTCTTAGAATTAGCTATGGATGAATTCATTGAACGGTATAA--AG  | 20299 |
| gb:MT019530 | Organism:Severe | AAATGGAAATTGATTTCTTAGAATTAGCTATGGATGAATTCATTGAACGGTATAAATTAG | 20302 |
| gb:MT039888 | Organism:Severe | AAATGGAAATTGATTTCTTAGAATTAGCTATGGATGAATTCATTGAACGGTATAAATTAG | 20302 |
| gb:LC522972 | Organism:Severe | AAATGGAAATTGATTTCTTAGAATTAGCTATGGATGAATTCATTGAACGGTATAAATTAG | 20299 |
| gb:MT027063 | Organism:Severe | AAATGGAAATTGATTTCTTAGAATTAGCTATGGATGAATTCATTGAACGGTATAAATTAG | 20302 |
| gb:MT027062 | Organism:Severe | AAATGGAAATTGATTTCTTAGAATTAGCTATGGATGAATTCATTGAACGGTATAAATTAG | 20302 |
| gb:MT019529 | Organism:Severe | AAATGGAAATTGATTTCTTAGAATTAGCTATGGATGAATTCATTGAACGGTATAAATTAG | 20302 |
| gb:MN996529 | Organism:Severe | AAATGGAAATTGATTTCTTAGAATTAGCTATGGATGAATTCATTGAACGGTATAAATTAG | 20290 |
| gb:MN996531 | Organism:Severe | AAATGGAAATTGATTTCTTAGAATTAGCTATGGATGAATTCATTGAACGGTATAAATTAG | 20289 |
| gb:MT066176 | Organism:Severe | AAATGGAAATTGATTTCTTAGAATTAGCTATGGATGAATTCATTGAACGGTATAAATTAG | 20302 |
| gb:MT027064 | Organism:Severe | AAATGGAAATTGATTTCTTAGAATTAGCTATGGATGAATTCATTGAACGGTATAAATTAG | 20302 |
| gb:MN994468 | Organism:Severe | AAATGGAAATTGATTTCTTAGAATTAGCTATGGATGAATTCATTGAACGGTATAAATTAG | 20302 |
| gb:MT072688 | Organism:Severe | AAATGGAAATTGATTTCTTAGAATTAGCTATGGATGAATTCATTGAACGGTATAAATTAG | 20287 |
| gb:MN996527 | Organism:Severe | AAATGGAAATTGATTTCTTAGAATTAGCTATGGATGAATTCATTGAACGGTATAAATTAG | 20269 |
| gb:MT093631 | Organism:Severe | AAATGGAAATTGATTTCTTAGAATTAGCTATGGATGAATTCATTGAACGGTATAAATTAG | 20340 |
| gb:MT106053 | Organism:Severe | AAATGGAAATTGATTTCTTAGAATTAGCTATGGATGAATTCATTGAACGGTATAAATTAG | 20302 |
| gb:MT019533 | Organism:Severe | AAATGGAAATTGATTTCTTAGAATTAGCTATGGATGAATTCATTGAACGGTATAAATTAG | 20302 |
| gb:MT019531 | Organism:Severe | AAATGGAAATTGATTTCTTAGAATTAGCTATGGATGAATTCATTGAACGGTATAAATTAG | 20302 |
| gb:MN996528 | Organism:Severe | AAATGGAAATTGATTTCTTAGAATTAGCTATGGATGAATTCATTGAACGGTATAAATTAG | 20302 |
| gb:MN996530 | Organism:Severe | AAATGGAAATTGATTTCTTAGAATTAGCTATGGATGAATTCATTGAACGGTATAAATTAG | 20288 |
| gb:MN908947 | Organism:Severe | AAATGGAAATTGATTTCTTAGAATTAGCTATGGATGAATTCATTGAACGGTATAAATTAG | 20302 |
| gb:MT019532 | Organism:Severe | AAATGGAAATTGATTTCTTAGAATTAGCTATGGATGAATTCATTGAACGGTATAAATTAG | 20302 |

\*\*\*\*\* \*\*

|             |                 |                                                              |       |
|-------------|-----------------|--------------------------------------------------------------|-------|
| gb:MT020781 | Organism:Severe | AAGGCTATGCCTTCGAACATATCGTTTATGGAGATTTTAGTCATAGTCAGTTAGGTGGTT | 20350 |
| gb:MT007544 | Organism:Severe | AAGGCTATGCCTTCGAACATATCGTTTATGGAGATTTTAGTCATAGTCAGTTAGGTGGTT | 20362 |

|             |                 |                                                             |       |
|-------------|-----------------|-------------------------------------------------------------|-------|
| gb:MN994467 | Organism:Severe | AAGGCTATGCCTTCGAACATATCGTTTATGGAGATTTAGTCATAGTCAGTTAGGTGGTT | 20362 |
| gb:MT044257 | Organism:Severe | AAGGCTATGCCTTCGAACATATCGTTTATGGAGATTTAGTCATAGTCAGTTAGGTGGTT | 20362 |
| gb:MT106054 | Organism:Severe | AAGGCTATGCCTTCGAACATATCGTTTATGGAGATTTAGTCATAGTCAGTTAGGTGGTT | 20362 |
| gb:MT049951 | Organism:Severe | AAGGCTATGCCTTCGAACATATCGTTTATGGAGATTTAGTCATAGTCAGTTAGGTGGTT | 20362 |
| gb:MN975262 | Organism:Severe | AAGGCTATGCCTTCGAACATATCGTTTATGGAGATTTAGTCATAGTCAGTTAGGTGGTT | 20362 |
| gb:MT106052 | Organism:Severe | AAGGCTATGCCTTCGAACATATCGTTTATGGAGATTTAGTCATAGTCAGTTAGGTGGTT | 20362 |
| gb:LC522975 | Organism:Severe | AAGGCTATGCCTTCGAACATATCGTTTATGGAGATTTAGTCATAGTCAGTTAGGTGGTT | 20359 |
| gb:LC522973 | Organism:Severe | AAGGCTATGCCTTCGAACATATCGTTTATGGAGATTTAGTCATAGTCAGTTAGGTGGTT | 20359 |
| gb:LC522974 | Organism:Severe | AAGGCTATGCCTTCGAACATATCGTTTATGGAGATTTAGTCATAGTCAGTTAGGTGGTT | 20359 |
| gb:MN985325 | Organism:Severe | AAGGCTATGCCTTCGAACATATCGTTTATGGAGATTTAGTCATAGTCAGTTAGGTGGTT | 20362 |
| gb:MT020881 | Organism:Severe | AAGGCTATGCCTTCGAACATATCGTTTATGGAGATTTAGTCATAGTCAGTTAGGTGGTT | 20362 |
| gb:MT020880 | Organism:Severe | AAGGCTATGCCTTCGAACATATCGTTTATGGAGATTTAGTCATAGTCAGTTAGGTGGTT | 20362 |
| gb:MT066175 | Organism:Severe | AAGGCTATGCCTTCGAACATATCGTTTATGGAGATTTAGTCATAGTCAGTTAGGTGGTT | 20362 |
| gb:MN997409 | Organism:Severe | AAGGCTATGCCTTCGAACATATCGTTTATGGAGATTTAGTCATAGTCAGTTAGGTGGTT | 20362 |
| gb:MN938384 | Organism:Severe | AAGGCTATGCCTTCGAACATATCGTTTATGGAGATTTAGTCATAGTCAGTTAGGTGGTT | 20330 |
| gb:MT044258 | Organism:Severe | AAGGCTATGCCTTCGAACATATCGTTTATGGAGATTTAGTCATAGTCAGTTAGGTGGTT | 20338 |
| gb:MT039890 | Organism:Severe | AAGGCTATGCCTTCGAACATATCGTTTATGGAGATTTAGTCATAGTCAGTTAGGTGGTT | 20362 |
| gb:MN988713 | Organism:Severe | AAGGCTATGCCTTCGAACATATCGTTTATGGAGATTTAGTCATAGTCAGTTAGGTGGTT | 20362 |
| gb:LC521925 | Organism:Severe | AAGGCTATGCCTTCGAACATATCGTTTATGGAGATTTAGTCATAGTCAGTTAGGTGGTT | 20335 |
| gb:MT093571 | Organism:Severe | AAGGCTATGCCTTCGAACATATCGTTTATGGAGATTTAGTCATAGTCAGTTAGGTGGTT | 20362 |
| gb:MT039887 | Organism:Severe | AAGGCTATGCCTTCGAACATATCGTTTATGGAGATTTAGTCATAGTCAGTTAGGTGGTT | 20359 |
| gb:MT019530 | Organism:Severe | AAGGCTATGCCTTCGAACATATCGTTTATGGAGATTTAGTCATAGTCAGTTAGGTGGTT | 20362 |
| gb:MT039888 | Organism:Severe | AAGGCTATGCCTTCGAACATATCGTTTATGGAGATTTAGTCATAGTCAGTTAGGTGGTT | 20362 |
| gb:LC522972 | Organism:Severe | AAGGCTATGCCTTCGAACATATCGTTTATGGAGATTTAGTCATAGTCAGTTAGGTGGTT | 20359 |
| gb:MT027063 | Organism:Severe | AAGGCTATGCCTTCGAACATATCGTTTATGGAGATTTAGTCATAGTCAGTTAGGTGGTT | 20362 |
| gb:MT027062 | Organism:Severe | AAGGCTATGCCTTCGAACATATCGTTTATGGAGATTTAGTCATAGTCAGTTAGGTGGTT | 20362 |
| gb:MT019529 | Organism:Severe | AAGGCTATGCCTTCGAACATATCGTTTATGGAGATTTAGTCATAGTCAGTTAGGTGGTT | 20362 |
| gb:MN996529 | Organism:Severe | AAGGCTATGCCTTCGAACATATCGTTTATGGAGATTTAGTCATAGTCAGTTAGGTGGTT | 20350 |
| gb:MN996531 | Organism:Severe | AAGGCTATGCCTTCGAACATATCGTTTATGGAGATTTAGTCATAGTCAGTTAGGTGGTT | 20349 |
| gb:MT066176 | Organism:Severe | AAGGCTATGCCTTCGAACATATCGTTTATGGAGATTTAGTCATAGTCAGTTAGGTGGTT | 20362 |
| gb:MT027064 | Organism:Severe | AAGGCTATGCCTTCGAACATATCGTTTATGGAGATTTAGTCATAGTCAGTTAGGTGGTT | 20362 |
| gb:MN994468 | Organism:Severe | AAGGCTATGCCTTCGAACATATCGTTTATGGAGATTTAGTCATAGTCAGTTAGGTGGTT | 20362 |
| gb:MT072688 | Organism:Severe | AAGGCTATGCCTTCGAACATATCGTTTATGGAGATTTAGTCATAGTCAGTTAGGTGGTT | 20347 |
| gb:MN996527 | Organism:Severe | AAGGCTATGCCTTCGAACATATCGTTTATGGAGATTTAGTCATAGTCAGTTAGGTGGTT | 20329 |
| gb:MT093631 | Organism:Severe | AAGGCTATGCCTTCGAACATATCGTTTATGGAGATTTAGTCATAGTCAGTTAGGTGGTT | 20400 |
| gb:MT106053 | Organism:Severe | AAGGCTATGCCTTCGAACATATCGTTTATGGAGATTTAGTCATAGTCAGTTAGGTGGTT | 20362 |
| gb:MT019533 | Organism:Severe | AAGGCTATGCCTTCGAACATATCGTTTATGGAGATTTAGTCATAGTCAGTTAGGTGGTT | 20362 |
| gb:MT019531 | Organism:Severe | AAGGCTATGCCTTCGAACATATCGTTTATGGAGATTTAGTCATAGTCAGTTAGGTGGTT | 20362 |
| gb:MN996528 | Organism:Severe | AAGGCTATGCCTTCGAACATATCGTTTATGGAGATTTAGTCATAGTCAGTTAGGTGGTT | 20362 |
| gb:MN996530 | Organism:Severe | AAGGCTATGCCTTCGAACATATCGTTTATGGAGATTTAGTCATAGTCAGTTAGGTGGTT | 20348 |
| gb:MN908947 | Organism:Severe | AAGGCTATGCCTTCGAACATATCGTTTATGGAGATTTAGTCATAGTCAGTTAGGTGGTT | 20362 |
| gb:MT019532 | Organism:Severe | AAGGCTATGCCTTCGAACATATCGTTTATGGAGATTTAGTCATAGTCAGTTAGGTGGTT | 20362 |

\*\*\*\*\*

|             |                 |                                                              |       |
|-------------|-----------------|--------------------------------------------------------------|-------|
| gb:MT020781 | Organism:Severe | TACATCTACTGATTGGACTAGCTAAACGTTTTAAGGAATCACCTTTTGAATTAGAAGATT | 20410 |
| gb:MT007544 | Organism:Severe | TACATCTACTGATTGGACTAGCTAAACGTTTTAAGGAATCACCTTTTGAATTAGAAGATT | 20422 |
| gb:MN994467 | Organism:Severe | TACATCTACTGATTGGACTAGCTAAACGTTTTAAGGAATCACCTTTTGAATTAGAAGATT | 20422 |
| gb:MT044257 | Organism:Severe | TACATCTACTGATTGGACTAGCTAAACGTTTTAAGGAATCACCTTTTGAATTAGAAGATT | 20422 |
| gb:MT106054 | Organism:Severe | TACATCTACTGATTGGACTAGCTAAACGTTTTAAGGAATCACCTTTTGAATTAGAAGATT | 20422 |
| gb:MT049951 | Organism:Severe | TACATCTACTGATTGGACTAGCTAAACGTTTTAAGGAATCACCTTTTGAATTAGAAGATT | 20422 |
| gb:MN975262 | Organism:Severe | TACATCTACTGATTGGACTAGCTAAACGTTTTAAGGAATCACCTTTTGAATTAGAAGATT | 20422 |
| gb:MT106052 | Organism:Severe | TACATCTACTGATTGGACTAGCTAAACGTTTTAAGGAATCACCTTTTGAATTAGAAGATT | 20422 |
| gb:LC522975 | Organism:Severe | TACATCTACTGATTGGACTAGCTAAACGTTTTAAGGAATCACCTTTTGAATTAGAAGATT | 20419 |
| gb:LC522973 | Organism:Severe | TACATCTACTGATTGGACTAGCTAAACGTTTTAAGGAATCACCTTTTGAATTAGAAGATT | 20419 |
| gb:LC522974 | Organism:Severe | TACATCTACTGATTGGACTAGCTAAACGTTTTAAGGAATCACCTTTTGAATTAGAAGATT | 20419 |
| gb:MN985325 | Organism:Severe | TACATCTACTGATTGGACTAGCTAAACGTTTTAAGGAATCACCTTTTGAATTAGAAGATT | 20422 |
| gb:MT020881 | Organism:Severe | TACATCTACTGATTGGACTAGCTAAACGTTTTAAGGAATCACCTTTTGAATTAGAAGATT | 20422 |
| gb:MT020880 | Organism:Severe | TACATCTACTGATTGGACTAGCTAAACGTTTTAAGGAATCACCTTTTGAATTAGAAGATT | 20422 |
| gb:MT066175 | Organism:Severe | TACATCTACTGATTGGACTAGCTAAACGTTTTAAGGAATCACCTTTTGAATTAGAAGATT | 20422 |
| gb:MN997409 | Organism:Severe | TACATCTACTGATTGGACTAGCTAAACGTTTTAAGGAATCACCTTTTGAATTAGAAGATT | 20422 |
| gb:MN938384 | Organism:Severe | TACATCTACTGATTGGACTAGCTAAACGTTTTAAGGAATCACCTTTTGAATTAGAAGATT | 20390 |
| gb:MT044258 | Organism:Severe | TACATCTACTGATTGGACTAGCTAAACGTTTTAAGGAATCACCTTTTGAATTAGAAGATT | 20398 |
| gb:MT039890 | Organism:Severe | TACATCTACTGATTGGACTAGCTAAACGTTTTAAGGAATCACCTTTTGAATTAGAAGATT | 20422 |
| gb:MN988713 | Organism:Severe | TACATCTACTGATTGGACTAGCTAAACGTTTTAAGGAATCACCTTTTGAATTAGAAGATT | 20422 |
| gb:LC521925 | Organism:Severe | TACATCTACTGATTGGACTAGCTAAACGTTTTAAGGAATCACCTTTTGAATTAGAAGATT | 20395 |

|             |                 |                                                              |       |
|-------------|-----------------|--------------------------------------------------------------|-------|
| gb:MT093571 | Organism:Severe | TACATCTACTGATTGGACTAGCTAAACGTTTTAAGGAATCACCTTTTGAATTAGAAGATT | 20422 |
| gb:MT039887 | Organism:Severe | TACATCTACTGATTGGACTAGCTAAACGTTTTAAGGAATCACCTTTTGAATTAGAAGATT | 20419 |
| gb:MT019530 | Organism:Severe | TACATCTACTGATTGGACTAGCTAAACGTTTTAAGGAATCACCTTTTGAATTAGAAGATT | 20422 |
| gb:MT039888 | Organism:Severe | TACATCTACTGATTGGACTAGCTAAACGTTTTAAGGAATCACCTTTTGAATTAGAAGATT | 20422 |
| gb:LC522972 | Organism:Severe | TACATCTACTGATTGGACTAGCTAAACGTTTTAAGGAATCACCTTTTGAATTAGAAGATT | 20419 |
| gb:MT027063 | Organism:Severe | TACATCTACTGATTGGACTAGCTAAACGTTTTAAGGAATCACCTTTTGAATTAGAAGATT | 20422 |
| gb:MT027062 | Organism:Severe | TACATCTACTGATTGGACTAGCTAAACGTTTTAAGGAATCACCTTTTGAATTAGAAGATT | 20422 |
| gb:MT019529 | Organism:Severe | TACATCTACTGATTGGACTAGCTAAACGTTTTAAGGAATCACCTTTTGAATTAGAAGATT | 20422 |
| gb:MN996529 | Organism:Severe | TACATCTACTGATTGGACTAGCTAAACGTTTTAAGGAATCACCTTTTGAATTAGAAGATT | 20410 |
| gb:MN996531 | Organism:Severe | TACATCTACTGATTGGACTAGCTAAACGTTTTAAGGAATCACCTTTTGAATTAGAAGATT | 20409 |
| gb:MT066176 | Organism:Severe | TACATCTACTGATTGGACTAGCTAAACGTTTTAAGGAATCACCTTTTGAATTAGAAGATT | 20422 |
| gb:MT027064 | Organism:Severe | TACATCTACTGATTGGACTAGCTAAACGTTTTAAGGAATCACCTTTTGAATTAGAAGATT | 20422 |
| gb:MN994468 | Organism:Severe | TACATCTACTGATTGGACTAGCTAAACGTTTTAAGGAATCACCTTTTGAATTAGAAGATT | 20422 |
| gb:MT072688 | Organism:Severe | TACATCTACTGATTGGACTAGCTAAACGTTTTAAGGAATCACCTTTTGAATTAGAAGATT | 20407 |
| gb:MN996527 | Organism:Severe | TACATCTACTGATTGGACTAGCTAAACGTTTTAAGGAATCACCTTTTGAATTAGAAGATT | 20389 |
| gb:MT093631 | Organism:Severe | TACATCTACTGATTGGACTAGCTAAACGTTTTAAGGAATCACCTTTTGAATTAGAAGATT | 20460 |
| gb:MT106053 | Organism:Severe | TACATCTACTGATTGGACTAGCTAAACGTTTTAAGGAATCACCTTTTGAATTAGAAGATT | 20422 |
| gb:MT019533 | Organism:Severe | TACATCTACTGATTGGACTAGCTAAACGTTTTAAGGAATCACCTTTTGAATTAGAAGATT | 20422 |
| gb:MT019531 | Organism:Severe | TACATCTACTGATTGGACTAGCTAAACGTTTTAAGGAATCACCTTTTGAATTAGAAGATT | 20422 |
| gb:MN996528 | Organism:Severe | TACATCTACTGATTGGACTAGCTAAACGTTTTAAGGAATCACCTTTTGAATTAGAAGATT | 20422 |
| gb:MN996530 | Organism:Severe | TACATCTACTGATTGGACTAGCTAAACGTTTTAAGGAATCACCTTTTGAATTAGAAGATT | 20408 |
| gb:MN908947 | Organism:Severe | TACATCTACTGATTGGACTAGCTAAACGTTTTAAGGAATCACCTTTTGAATTAGAAGATT | 20422 |
| gb:MT019532 | Organism:Severe | TACATCTACTGATTGGACTAGCTAAACGTTTTAAGGAATCACCTTTTGAATTAGAAGATT | 20422 |

\*\*\*\*\*

|             |                 |                                                                |       |
|-------------|-----------------|----------------------------------------------------------------|-------|
| gb:MT020781 | Organism:Severe | TTATTCCTATGGACAGTACAGTAAAAAACTATTTTCATAACAGATGCGCAAACAGGTTTCAT | 20470 |
| gb:MT007544 | Organism:Severe | TTATTCCTATGGACAGTACAGTAAAAAACTATTTTCATAACAGATGCGCAAACAGGTTTCAT | 20482 |
| gb:MN994467 | Organism:Severe | TTATTCCTATGGACAGTACAGTAAAAAACTATTTTCATAACAGATGCGCAAACAGGTTTCAT | 20482 |
| gb:MT044257 | Organism:Severe | TTATTCCTATGGACAGTACAGTAAAAAACTATTTTCATAACAGATGCGCAAACAGGTTTCAT | 20482 |
| gb:MT106054 | Organism:Severe | TTATTCCTATGGACAGTACAGTAAAAAACTATTTTCATAACAGATGCGCAAACAGGTTTCAT | 20482 |
| gb:MT049951 | Organism:Severe | TTATTCCTATGGACAGTACAGTAAAAAACTATTTTCATAACAGATGCGCAAACAGGTTTCAT | 20482 |
| gb:MN975262 | Organism:Severe | TTATTCCTATGGACAGTACAGTAAAAAACTATTTTCATAACAGATGCGCAAACAGGTTTCAT | 20482 |
| gb:MT106052 | Organism:Severe | TTATTCCTATGGACAGTACAGTAAAAAACTATTTTCATAACAGATGCGCAAACAGGTTTCAT | 20482 |
| gb:LC522975 | Organism:Severe | TTATTCCTATGGACAGTACAGTAAAAAACTATTTTCATAACAGATGCGCAAACAGGTTTCAT | 20479 |
| gb:LC522973 | Organism:Severe | TTATTCCTATGGACAGTACAGTAAAAAACTATTTTCATAACAGATGCGCAAACAGGTTTCAT | 20479 |
| gb:LC522974 | Organism:Severe | TTATTCCTATGGACAGTACAGTAAAAAACTATTTTCATAACAGATGCGCAAACAGGTTTCAT | 20479 |
| gb:MN985325 | Organism:Severe | TTATTCCTATGGACAGTACAGTAAAAAACTATTTTCATAACAGATGCGCAAACAGGTTTCAT | 20482 |
| gb:MT020881 | Organism:Severe | TTATTCCTATGGACAGTACAGTAAAAAACTATTTTCATAACAGATGCGCAAACAGGTTTCAT | 20482 |
| gb:MT020880 | Organism:Severe | TTATTCCTATGGACAGTACAGTAAAAAACTATTTTCATAACAGATGCGCAAACAGGTTTCAT | 20482 |
| gb:MT066175 | Organism:Severe | TTATTCCTATGGACAGTACAGTAAAAAACTATTTTCATAACAGATGCGCAAACAGGTTTCAT | 20482 |
| gb:MN997409 | Organism:Severe | TTATTCCTATGGACAGTACAGTAAAAAACTATTTTCATAACAGATGCGCAAACAGGTTTCAT | 20482 |
| gb:MN938384 | Organism:Severe | TTATTCCTATGGACAGTACAGTAAAAAACTATTTTCATAACAGATGCGCAAACAGGTTTCAT | 20450 |
| gb:MT044258 | Organism:Severe | TTATTCCTATGGACAGTACAGTAAAAAACTATTTTCATAACAGATGCGCAAACAGGTTTCAT | 20458 |
| gb:MT039890 | Organism:Severe | TTATTCCTATGGACAGTACAGTAAAAAACTATTTTCATAACAGATGCGCAAACAGGTTTCAT | 20482 |
| gb:MN988713 | Organism:Severe | TTATTCCTATGGACAGTACAGTAAAAAACTATTTTCATAACAGATGCGCAAACAGGTTTCAT | 20482 |
| gb:LC521925 | Organism:Severe | TTATTCCTATGGACAGTACAGTAAAAAACTATTTTCATAACAGATGCGCAAACAGGTTTCAT | 20455 |
| gb:MT093571 | Organism:Severe | TTATTCCTATGGACAGTACAGTAAAAAACTATTTTCATAACAGATGCGCAAACAGGTTTCAT | 20482 |
| gb:MT039887 | Organism:Severe | TTATTCCTATGGACAGTACAGTAAAAAACTATTTTCATAACAGATGCGCAAACAGGTTTCAT | 20479 |
| gb:MT019530 | Organism:Severe | TTATTCCTATGGACAGTACAGTAAAAAACTATTTTCATAACAGATGCGCAAACAGGTTTCAT | 20482 |
| gb:MT039888 | Organism:Severe | TTATTCCTATGGACAGTACAGTAAAAAACTATTTTCATAACAGATGCGCAAACAGGTTTCAT | 20482 |
| gb:LC522972 | Organism:Severe | TTATTCCTATGGACAGTACAGTAAAAAACTATTTTCATAACAGATGCGCAAACAGGTTTCAT | 20479 |
| gb:MT027063 | Organism:Severe | TTATTCCTATGGACAGTACAGTAAAAAACTATTTTCATAACAGATGCGCAAACAGGTTTCAT | 20482 |
| gb:MT027062 | Organism:Severe | TTATTCCTATGGACAGTACAGTAAAAAACTATTTTCATAACAGATGCGCAAACAGGTTTCAT | 20482 |
| gb:MT019529 | Organism:Severe | TTATTCCTATGGACAGTACAGTAAAAAACTATTTTCATAACAGATGCGCAAACAGGTTTCAT | 20482 |
| gb:MN996529 | Organism:Severe | TTATTCCTATGGACAGTACAGTAAAAAACTATTTTCATAACAGATGCGCAAACAGGTTTCAT | 20470 |
| gb:MN996531 | Organism:Severe | TTATTCCTATGGACAGTACAGTAAAAAACTATTTTCATAACAGATGCGCAAACAGGTTTCAT | 20469 |
| gb:MT066176 | Organism:Severe | TTATTCCTATGGACAGTACAGTAAAAAACTATTTTCATAACAGATGCGCAAACAGGTTTCAT | 20482 |
| gb:MT027064 | Organism:Severe | TTATTCCTATGGACAGTACAGTAAAAAACTATTTTCATAACAGATGCGCAAACAGGTTTCAT | 20482 |
| gb:MN994468 | Organism:Severe | TTATTCCTATGGACAGTACAGTAAAAAACTATTTTCATAACAGATGCGCAAACAGGTTTCAT | 20482 |
| gb:MT072688 | Organism:Severe | TTATTCCTATGGACAGTACAGTAAAAAACTATTTTCATAACAGATGCGCAAACAGGTTTCAT | 20467 |
| gb:MN996527 | Organism:Severe | TTATTCCTATGGACAGTACAGTAAAAAACTATTTTCATAACAGATGCGCAAACAGGTTTCAT | 20449 |
| gb:MT093631 | Organism:Severe | TTATTCCTATGGACAGTACAGTAAAAAACTATTTTCATAACAGATGCGCAAACAGGTTTCAT | 20520 |
| gb:MT106053 | Organism:Severe | TTATTCCTATGGACAGTACAGTAAAAAACTATTTTCATAACAGATGCGCAAACAGGTTTCAT | 20482 |
| gb:MT019533 | Organism:Severe | TTATTCCTATGGACAGTACAGTAAAAAACTATTTTCATAACAGATGCGCAAACAGGTTTCAT | 20482 |
| gb:MT019531 | Organism:Severe | TTATTCCTATGGACAGTACAGTAAAAAACTATTTTCATAACAGATGCGCAAACAGGTTTCAT | 20482 |

|             |                  |                                                              |       |
|-------------|------------------|--------------------------------------------------------------|-------|
| gb:MN996528 | Organism: Severe | TTATTCCTATGGACAGTACAGTAAAAAACTATTTCATAACAGATGCGCAAACAGTTTCAT | 20482 |
| gb:MN996530 | Organism: Severe | TTATTCCTATGGACAGTACAGTAAAAAACTATTTCATAACAGATGCGCAAACAGTTTCAT | 20468 |
| gb:MN908947 | Organism: Severe | TTATTCCTATGGACAGTACAGTAAAAAACTATTTCATAACAGATGCGCAAACAGTTTCAT | 20482 |
| gb:MT019532 | Organism: Severe | TTATTCCTATGGACAGTACAGTAAAAAACTATTTCATAACAGATGCGCAAACAGTTTCAT | 20482 |
| *****       |                  |                                                              |       |
| gb:MT020781 | Organism: Severe | CTAAGTGTGTGTGTTCTGTTATTGATTTATTACTTGATGATTTTGTGAAATAATAAAAAT | 20530 |
| gb:MT007544 | Organism: Severe | CTAAGTGTGTGTGTTCTGTTATTGATTTATTACTTGATGATTTTGTGAAATAATAAAAAT | 20542 |
| gb:MN994467 | Organism: Severe | CTAAGTGTGTGTGTTCTGTTATTGATTTATTACTTGATGATTTTGTGAAATAATAAAAAT | 20542 |
| gb:MT044257 | Organism: Severe | CTAAGTGTGTGTGTTCTGTTATTGATTTATTACTTGATGATTTTGTGAAATAATAAAAAT | 20542 |
| gb:MT106054 | Organism: Severe | CTAAGTGTGTGTGTTCTGTTATTGATTTATTACTTGATGATTTTGTGAAATAATAAAAAT | 20542 |
| gb:MT049951 | Organism: Severe | CTAAGTGTGTGTGTTCTGTTATTGATTTATTACTTGATGATTTTGTGAAATAATAAAAAT | 20542 |
| gb:MN975262 | Organism: Severe | CTAAGTGTGTGTGTTCTGTTATTGATTTATTACTTGATGATTTTGTGAAATAATAAAAAT | 20542 |
| gb:MT106052 | Organism: Severe | CTAAGTGTGTGTGTTCTGTTATTGATTTATTACTTGATGATTTTGTGAAATAATAAAAAT | 20542 |
| gb:LC522975 | Organism: Severe | CTAAGTGTGTGTGTTCTGTTATTGATTTATTACTTGATGATTTTGTGAAATAATAAAAAT | 20539 |
| gb:LC522973 | Organism: Severe | CTAAGTGTGTGTGTTCTGTTATTGATTTATTACTTGATGATTTTGTGAAATAATAAAAAT | 20539 |
| gb:LC522974 | Organism: Severe | CTAAGTGTGTGTGTTCTGTTATTGATTTATTACTTGATGATTTTGTGAAATAATAAAAAT | 20539 |
| gb:MN985325 | Organism: Severe | CTAAGTGTGTGTTCTGTTATTGATTTATTACTTGATGATTTTGTGAAATAATAAAAAT   | 20542 |
| gb:MT020881 | Organism: Severe | CTAAGTGTGTGTTCTGTTATTGATTTATTACTTGATGATTTTGTGAAATAATAAAAAT   | 20542 |
| gb:MT020880 | Organism: Severe | CTAAGTGTGTGTTCTGTTATTGATTTATTACTTGATGATTTTGTGAAATAATAAAAAT   | 20542 |
| gb:MT066175 | Organism: Severe | CTAAGTGTGTGTTCTGTTATTGATTTATTACTTGATGATTTTGTGAAATAATAAAAAT   | 20542 |
| gb:MN997409 | Organism: Severe | CTAAGTGTGTGTTCTGTTATTGATTTATTACTTGATGATTTTGTGAAATAATAAAAAT   | 20542 |
| gb:MN938384 | Organism: Severe | CTAAGTGTGTGTTCTGTTATTGATTTATTACTTGATGATTTTGTGAAATAATAAAAAT   | 20510 |
| gb:MT044258 | Organism: Severe | CTAAGTGTGTGTTCTGTTATTGATTTATTACTTGATGATTTTGTGAAATAATAAAAAT   | 20518 |
| gb:MT039890 | Organism: Severe | CTAAGTGTGTGTTCTGTTATTGATTTATTACTTGATGATTTTGTGAAATAATAAAAAT   | 20542 |
| gb:MN988713 | Organism: Severe | CTAAGTGTGTGTTCTGTTATTGATTTATTACTTGATGATTTTGTGAAATAATAAAAAT   | 20542 |
| gb:LC521925 | Organism: Severe | CTAAGTGTGTGTTCTGTTATTGATTTATTACTTGATGATTTTGTGAAATAATAAAAAT   | 20515 |
| gb:MT093571 | Organism: Severe | CTAAGTGTGTGTTCTGTTATTGATTTATTACTTGATGATTTTGTGAAATAATAAAAAT   | 20542 |
| gb:MT039887 | Organism: Severe | CTAAGTGTGTGTTCTGTTATTGATTTATTACTTGATGATTTTGTGAAATAATAAAAAT   | 20539 |
| gb:MT019530 | Organism: Severe | CTAAGTGTGTGTTCTGTTATTGATTTATTACTTGATGATTTTGTGAAATAATAAAAAT   | 20542 |
| gb:MT039888 | Organism: Severe | CTAAGTGTGTGTTCTGTTATTGATTTATTACTTGATGATTTTGTGAAATAATAAAAAT   | 20542 |
| gb:LC522972 | Organism: Severe | CTAAGTGTGTGTTCTGTTATTGATTTATTACTTGATGATTTTGTGAAATAATAAAAAT   | 20539 |
| gb:MT027063 | Organism: Severe | CTAAGTGTGTGTTCTGTTATTGATTTATTACTTGATGATTTTGTGAAATAATAAAAAT   | 20542 |
| gb:MT027062 | Organism: Severe | CTAAGTGTGTGTTCTGTTATTGATTTATTACTTGATGATTTTGTGAAATAATAAAAAT   | 20542 |
| gb:MT019529 | Organism: Severe | CTAAGTGTGTGTTCTGTTATTGATTTATTACTTGATGATTTTGTGAAATAATAAAAAT   | 20542 |
| gb:MN996529 | Organism: Severe | CTAAGTGTGTGTTCTGTTATTGATTTATTACTTGATGATTTTGTGAAATAATAAAAAT   | 20530 |
| gb:MN996531 | Organism: Severe | CTAAGTGTGTGTTCTGTTATTGATTTATTACTTGATGATTTTGTGAAATAATAAAAAT   | 20529 |
| gb:MT066176 | Organism: Severe | CTAAGTGTGTGTTCTGTTATTGATTTATTACTTGATGATTTTGTGAAATAATAAAAAT   | 20542 |
| gb:MT027064 | Organism: Severe | CTAAGTGTGTGTTCTGTTATTGATTTATTACTTGATGATTTTGTGAAATAATAAAAAT   | 20542 |
| gb:MN994468 | Organism: Severe | CTAAGTGTGTGTTCTGTTATTGATTTATTACTTGATGATTTTGTGAAATAATAAAAAT   | 20542 |
| gb:MT072688 | Organism: Severe | CTAAGTGTGTGTTCTGTTATTGATTTATTACTTGATGATTTTGTGAAATAATAAAAAT   | 20527 |
| gb:MN996527 | Organism: Severe | CTAAGTGTGTGTTCTGTTATTGATTTATTACTTGATGATTTTGTGAAATAATAAAAAT   | 20509 |
| gb:MT093631 | Organism: Severe | CTAAGTGTGTGTTCTGTTATTGATTTATTACTTGATGATTTTGTGAAATAATAAAAAT   | 20580 |
| gb:MT106053 | Organism: Severe | CTAAGTGTGTGTTCTGTTATTGATTTATTACTTGATGATTTTGTGAAATAATAAAAAT   | 20542 |
| gb:MT019533 | Organism: Severe | CTAAGTGTGTGTTCTGTTATTGATTTATTACTTGATGATTTTGTGAAATAATAAAAAT   | 20542 |
| gb:MT019531 | Organism: Severe | CTAAGTGTGTGTTCTGTTATTGATTTATTACTTGATGATTTTGTGAAATAATAAAAAT   | 20542 |
| gb:MN996528 | Organism: Severe | CTAAGTGTGTGTTCTGTTATTGATTTATTACTTGATGATTTTGTGAAATAATAAAAAT   | 20542 |
| gb:MN996530 | Organism: Severe | CTAAGTGTGTGTTCTGTTATTGATTTATTACTTGATGATTTTGTGAAATAATAAAAAT   | 20528 |
| gb:MN908947 | Organism: Severe | CTAAGTGTGTGTTCTGTTATTGATTTATTACTTGATGATTTTGTGAAATAATAAAAAT   | 20542 |
| gb:MT019532 | Organism: Severe | CTAAGTGTGTGTTCTGTTATTGATTTATTACTTGATGATTTTGTGAAATAATAAAAAT   | 20542 |
| *****       |                  |                                                              |       |
| gb:MT020781 | Organism: Severe | CCCAAGATTTATCTGTAGTTTCTAAGGTTGTCAAAGTGACTATTGACTATACAGAAATTT | 20590 |
| gb:MT007544 | Organism: Severe | CCCAAGATTTATCTGTAGTTTCTAAGGTTGTCAAAGTGACTATTGACTATACAGAAATTT | 20602 |
| gb:MN994467 | Organism: Severe | CCCAAGATTTATCTGTAGTTTCTAAGGTTGTCAAAGTGACTATTGACTATACAGAAATTT | 20602 |
| gb:MT044257 | Organism: Severe | CCCAAGATTTATCTGTAGTTTCTAAGGTTGTCAAAGTGACTATTGACTATACAGAAATTT | 20602 |
| gb:MT106054 | Organism: Severe | CCCAAGATTTATCTGTAGTTTCTAAGGTTGTCAAAGTGACTATTGACTATACAGAAATTT | 20602 |
| gb:MT049951 | Organism: Severe | CCCAAGATTTATCTGTAGTTTCTAAGGTTGTCAAAGTGACTATTGACTATACAGAAATTT | 20602 |
| gb:MN975262 | Organism: Severe | CCCAAGATTTATCTGTAGTTTCTAAGGTTGTCAAAGTGACTATTGACTATACAGAAATTT | 20602 |
| gb:MT106052 | Organism: Severe | CCCAAGATTTATCTGTAGTTTCTAAGGTTGTCAAAGTGACTATTGACTATACAGAAATTT | 20602 |
| gb:LC522975 | Organism: Severe | CCCAAGATTTATCTGTAGTTTCTAAGGTTGTCAAAGTGACTATTGACTATACAGAAATTT | 20599 |
| gb:LC522973 | Organism: Severe | CCCAAGATTTATCTGTAGTTTCTAAGGTTGTCAAAGTGACTATTGACTATACAGAAATTT | 20599 |
| gb:LC522974 | Organism: Severe | CCCAAGATTTATCTGTAGTTTCTAAGGTTGTCAAAGTGACTATTGACTATACAGAAATTT | 20599 |
| gb:MN985325 | Organism: Severe | CCCAAGATTTATCTGTAGTTTCTAAGGTTGTCAAAGTGACTATTGACTATACAGAAATTT | 20602 |
| gb:MT020881 | Organism: Severe | CCCAAGATTTATCTGTAGTTTCTAAGGTTGTCAAAGTGACTATTGACTATACAGAAATTT | 20602 |



|             |                 |                                                              |       |
|-------------|-----------------|--------------------------------------------------------------|-------|
| gb:MT027064 | Organism:Severe | CATTTATGCTTTGGTGTAAAGATGGCCATGTAGAAACATTTTACCCAAAATTACAATCTA | 20662 |
| gb:MN994468 | Organism:Severe | CATTTATGCTTTGGTGTAAAGATGGCCATGTAGAAACATTTTACCCAAAATTACAATCTA | 20662 |
| gb:MT072688 | Organism:Severe | CATTTATGCTTTGGTGTAAAGATGGCCATGTAGAAACATTTTACCCAAAATTACAATCTA | 20647 |
| gb:MN996527 | Organism:Severe | CATTTATGCTTTGGTGTAAAGATGGCCATGTAGAAACATTTTACCCAAAATTACAATCTA | 20629 |
| gb:MT093631 | Organism:Severe | CATTTATGCTTTGGTGTAAAGATGGCCATGTAGAAACATTTTACCCAAAATTACAATCTA | 20700 |
| gb:MT106053 | Organism:Severe | CATTTATGCTTTGGTGTAAAGATGGCCATGTAGAAACATTTTACCCAAAATTACAATCTA | 20662 |
| gb:MT019533 | Organism:Severe | CATTTATGCTTTGGTGTAAAGATGGCCATGTAGAAACATTTTACCCAAAATTACAATCTA | 20662 |
| gb:MT019531 | Organism:Severe | CATTTATGCTTTGGTGTAAAGATGGCCATGTAGAAACATTTTACCCAAAATTACAATCTA | 20662 |
| gb:MN996528 | Organism:Severe | CATTTATGCTTTGGTGTAAAGATGGCCATGTAGAAACATTTTACCCAAAATTACAATCTA | 20662 |
| gb:MN996530 | Organism:Severe | CATTTATGCTTTGGTGTAAAGATGGCCATGTAGAAACATTTTACCCAAAATTACAATCTA | 20648 |
| gb:MN908947 | Organism:Severe | CATTTATGCTTTGGTGTAAAGATGGCCATGTAGAAACATTTTACCCAAAATTACAATCTA | 20662 |
| gb:MT019532 | Organism:Severe | CATTTATGCTTTGGTGTAAAGATGGCCATGTAGAAACATTTTACCCAAAATTACAATCTA | 20662 |

\*\*\*\*\*

|             |                 |                                                              |       |
|-------------|-----------------|--------------------------------------------------------------|-------|
| gb:MT020781 | Organism:Severe | GTCAAGCGTGGCAACCGGGTGTTCCTATGCCTAATCTTTACAAAATGCAAAGAATGCTAT | 20710 |
| gb:MT007544 | Organism:Severe | GTCAAGCGTGGCAACCGGGTGTTCCTATGCCTAATCTTTACAAAATGCAAAGAATGCTAT | 20722 |
| gb:MN994467 | Organism:Severe | GTCAAGCGTGGCAACCGGGTGTTCCTATGCCTAATCTTTACAAAATGCAAAGAATGCTAT | 20722 |
| gb:MT044257 | Organism:Severe | GTCAAGCGTGGCAACCGGGTGTTCCTATGCCTAATCTTTACAAAATGCAAAGAATGCTAT | 20722 |
| gb:MT106054 | Organism:Severe | GTCAAGCGTGGCAACCGGGTGTTCCTATGCCTAATCTTTACAAAATGCAAAGAATGCTAT | 20722 |
| gb:MT049951 | Organism:Severe | GTCAAGCGTGGCAACCGGGTGTTCCTATGCCTAATCTTTACAAAATGCAAAGAATGCTAT | 20722 |
| gb:MN975262 | Organism:Severe | GTCAAGCGTGGCAACCGGGTGTTCCTATGCCTAATCTTTACAAAATGCAAAGAATGCTAT | 20722 |
| gb:MT106052 | Organism:Severe | GTCAAGCGTGGCAACCGGGTGTTCCTATGCCTAATCTTTACAAAATGCAAAGAATGCTAT | 20722 |
| gb:LC522975 | Organism:Severe | GTCAAGCGTGGCAACCGGGTGTTCCTATGCCTAATCTTTACAAAATGCAAAGAATGCTAT | 20719 |
| gb:LC522973 | Organism:Severe | GTCAAGCGTGGCAACCGGGTGTTCCTATGCCTAATCTTTACAAAATGCAAAGAATGCTAT | 20719 |
| gb:LC522974 | Organism:Severe | GTCAAGCGTGGCAACCGGGTGTTCCTATGCCTAATCTTTACAAAATGCAAAGAATGCTAT | 20719 |
| gb:MN985325 | Organism:Severe | GTCAAGCGTGGCAACCGGGTGTTCCTATGCCTAATCTTTACAAAATGCAAAGAATGCTAT | 20722 |
| gb:MT020881 | Organism:Severe | GTCAAGCGTGGCAACCGGGTGTTCCTATGCCTAATCTTTACAAAATGCAAAGAATGCTAT | 20722 |
| gb:MT020880 | Organism:Severe | GTCAAGCGTGGCAACCGGGTGTTCCTATGCCTAATCTTTACAAAATGCAAAGAATGCTAT | 20722 |
| gb:MT066175 | Organism:Severe | GTCAAGCGTGGCAACCGGGTGTTCCTATGCCTAATCTTTACAAAATGCAAAGAATGCTAT | 20722 |
| gb:MN997409 | Organism:Severe | GTCAAGCGTGGCAACCGGGTGTTCCTATGCCTAATCTTTACAAAATGCAAAGAATGCTAT | 20722 |
| gb:MN938384 | Organism:Severe | GTCAAGCGTGGCAACCGGGTGTTCCTATGCCTAATCTTTACAAAATGCAAAGAATGCTAT | 20690 |
| gb:MT044258 | Organism:Severe | GTCAAGCGTGGCAACCGGGTGTTCCTATGCCTAATCTTTACAAAATGCAAAGAATGCTAT | 20698 |
| gb:MT039890 | Organism:Severe | GTCAAGCGTGGCAACCGGGTGTTCCTATGCCTAATCTTTACAAAATGCAAAGAATGCTAT | 20722 |
| gb:MN988713 | Organism:Severe | GTCAAGCGTGGCAACCGGGTGTTCCTATGCCTAATCTTTACAAAATGCAAAGAATGCTAT | 20722 |
| gb:LC521925 | Organism:Severe | GTCAAGCGTGGCAACCGGGTGTTCCTATGCCTAATCTTTACAAAATGCAAAGAATGCTAT | 20695 |
| gb:MT093571 | Organism:Severe | GTCAAGCGTGGCAACCGGGTGTTCCTATGCCTAATCTTTACAAAATGCAAAGAATGCTAT | 20722 |
| gb:MT039887 | Organism:Severe | GTCAAGCGTGGCAACCGGGTGTTCCTATGCCTAATCTTTACAAAATGCAAAGAATGCTAT | 20719 |
| gb:MT019530 | Organism:Severe | GTCAAGCGTGGCAACCGGGTGTTCCTATGCCTAATCTTTACAAAATGCAAAGAATGCTAT | 20722 |
| gb:MT039888 | Organism:Severe | GTCAAGCGTGGCAACCGGGTGTTCCTATGCCTAATCTTTACAAAATGCAAAGAATGCTAT | 20722 |
| gb:LC522972 | Organism:Severe | GTCAAGCGTGGCAACCGGGTGTTCCTATGCCTAATCTTTACAAAATGCAAAGAATGCTAT | 20719 |
| gb:MT027063 | Organism:Severe | GTCAAGCGTGGCAACCGGGTGTTCCTATGCCTAATCTTTACAAAATGCAAAGAATGCTAT | 20722 |
| gb:MT027062 | Organism:Severe | GTCAAGCGTGGCAACCGGGTGTTCCTATGCCTAATCTTTACAAAATGCAAAGAATGCTAT | 20722 |
| gb:MT019529 | Organism:Severe | GTCAAGCGTGGCAACCGGGTGTTCCTATGCCTAATCTTTACAAAATGCAAAGAATGCTAT | 20722 |
| gb:MN996529 | Organism:Severe | GTCAAGCGTGGCAACCGGGTGTTCCTATGCCTAATCTTTACAAAATGCAAAGAATGCTAT | 20710 |
| gb:MN996531 | Organism:Severe | GTCAAGCGTGGCAACCGGGTGTTCCTATGCCTAATCTTTACAAAATGCAAAGAATGCTAT | 20709 |
| gb:MT066176 | Organism:Severe | GTCAAGCGTGGCAACCGGGTGTTCCTATGCCTAATCTTTACAAAATGCAAAGAATGCTAT | 20722 |
| gb:MT027064 | Organism:Severe | GTCAAGCGTGGCAACCGGGTGTTCCTATGCCTAATCTTTACAAAATGCAAAGAATGCTAT | 20722 |
| gb:MN994468 | Organism:Severe | GTCAAGCGTGGCAACCGGGTGTTCCTATGCCTAATCTTTACAAAATGCAAAGAATGCTAT | 20722 |
| gb:MT072688 | Organism:Severe | GTCAAGCGTGGCAACCGGGTGTTCCTATGCCTAATCTTTACAAAATGCAAAGAATGCTAT | 20707 |
| gb:MN996527 | Organism:Severe | GTCAAGCGTGGCAACCGGGTGTTCCTATGCCTAATCTTTACAAAATGCAAAGAATGCTAT | 20689 |
| gb:MT093631 | Organism:Severe | GTCAAGCGTGGCAACCGGGTGTTCCTATGCCTAATCTTTACAAAATGCAAAGAATGCTAT | 20760 |
| gb:MT106053 | Organism:Severe | GTCAAGCGTGGCAACCGGGTGTTCCTATGCCTAATCTTTACAAAATGCAAAGAATGCTAT | 20722 |
| gb:MT019533 | Organism:Severe | GTCAAGCGTGGCAACCGGGTGTTCCTATGCCTAATCTTTACAAAATGCAAAGAATGCTAT | 20722 |
| gb:MT019531 | Organism:Severe | GTCAAGCGTGGCAACCGGGTGTTCCTATGCCTAATCTTTACAAAATGCAAAGAATGCTAT | 20722 |
| gb:MN996528 | Organism:Severe | GTCAAGCGTGGCAACCGGGTGTTCCTATGCCTAATCTTTACAAAATGCAAAGAATGCTAT | 20722 |
| gb:MN996530 | Organism:Severe | GTCAAGCGTGGCAACCGGGTGTTCCTATGCCTAATCTTTACAAAATGCAAAGAATGCTAT | 20708 |
| gb:MN908947 | Organism:Severe | GTCAAGCGTGGCAACCGGGTGTTCCTATGCCTAATCTTTACAAAATGCAAAGAATGCTAT | 20722 |
| gb:MT019532 | Organism:Severe | GTCAAGCGTGGCAACCGGGTGTTCCTATGCCTAATCTTTACAAAATGCAAAGAATGCTAT | 20722 |

\*\*\*\*\*

|             |                 |                                                              |       |
|-------------|-----------------|--------------------------------------------------------------|-------|
| gb:MT020781 | Organism:Severe | TAGAAAAGTGTGACCTTCAAATTTATGGTGATAGTGCAACATTACCTAAAGGCATAATGA | 20770 |
| gb:MT007544 | Organism:Severe | TAGAAAAGTGTGACCTTCAAATTTATGGTGATAGTGCAACATTACCTAAAGGCATAATGA | 20782 |
| gb:MN994467 | Organism:Severe | TAGAAAAGTGTGACCTTCAAATTTATGGTGATAGTGCAACATTACCTAAAGGCATAATGA | 20782 |
| gb:MT044257 | Organism:Severe | TAGAAAAGTGTGACCTTCAAATTTATGGTGATAGTGCAACATTACCTAAAGGCATAATGA | 20782 |
| gb:MT106054 | Organism:Severe | TAGAAAAGTGTGACCTTCAAATTTATGGTGATAGTGCAACATTACCTAAAGGCATAATGA | 20782 |

|             |                 |                      |       |
|-------------|-----------------|----------------------|-------|
| gb:MT049951 | Organism:Severe | TAGAAAAGTGTGACCTTCAA | 20782 |
| gb:MN975262 | Organism:Severe | TAGAAAAGTGTGACCTTCAA | 20782 |
| gb:MT106052 | Organism:Severe | TAGAAAAGTGTGACCTTCAA | 20782 |
| gb:LC522975 | Organism:Severe | TAGAAAAGTGTGACCTTCAA | 20779 |
| gb:LC522973 | Organism:Severe | TAGAAAAGTGTGACCTTCAA | 20779 |
| gb:LC522974 | Organism:Severe | TAGAAAAGTGTGACCTTCAA | 20779 |
| gb:MN985325 | Organism:Severe | TAGAAAAGTGTGACCTTCAA | 20782 |
| gb:MT020881 | Organism:Severe | TAGAAAAGTGTGACCTTCAA | 20782 |
| gb:MT020880 | Organism:Severe | TAGAAAAGTGTGACCTTCAA | 20782 |
| gb:MT066175 | Organism:Severe | TAGAAAAGTGTGACCTTCAA | 20782 |
| gb:MN997409 | Organism:Severe | TAGAAAAGTGTGACCTTCAA | 20782 |
| gb:MN938384 | Organism:Severe | TAGAAAAGTGTGACCTTCAA | 20750 |
| gb:MT044258 | Organism:Severe | TAGAAAAGTGTGACCTTCAA | 20758 |
| gb:MT039890 | Organism:Severe | TAGAAAAGTGTGACCTTCAA | 20782 |
| gb:MN988713 | Organism:Severe | TAGAAAAGTGTGACCTTCAA | 20782 |
| gb:LC521925 | Organism:Severe | TAGAAAAGTGTGACCTTCAA | 20755 |
| gb:MT093571 | Organism:Severe | TAGAAAAGTGTGACCTTCAA | 20782 |
| gb:MT039887 | Organism:Severe | TAGAAAAGTGTGACCTTCAA | 20779 |
| gb:MT019530 | Organism:Severe | TAGAAAAGTGTGACCTTCAA | 20782 |
| gb:MT039888 | Organism:Severe | TAGAAAAGTGTGACCTTCAA | 20782 |
| gb:LC522972 | Organism:Severe | TAGAAAAGTGTGACCTTCAA | 20779 |
| gb:MT027063 | Organism:Severe | TAGAAAAGTGTGACCTTCAA | 20782 |
| gb:MT027062 | Organism:Severe | TAGAAAAGTGTGACCTTCAA | 20782 |
| gb:MT019529 | Organism:Severe | TAGAAAAGTGTGACCTTCAA | 20782 |
| gb:MN996529 | Organism:Severe | TAGAAAAGTGTGACCTTCAA | 20770 |
| gb:MN996531 | Organism:Severe | TAGAAAAGTGTGACCTTCAA | 20769 |
| gb:MT066176 | Organism:Severe | TAGAAAAGTGTGACCTTCAA | 20782 |
| gb:MT027064 | Organism:Severe | TAGAAAAGTGTGACCTTCAA | 20782 |
| gb:MN994468 | Organism:Severe | TAGAAAAGTGTGACCTTCAA | 20782 |
| gb:MT072688 | Organism:Severe | TAGAAAAGTGTGACCTTCAA | 20767 |
| gb:MN996527 | Organism:Severe | TAGAAAAGTGTGACCTTCAA | 20749 |
| gb:MT093631 | Organism:Severe | TAGAAAAGTGTGACCTTCAA | 20820 |
| gb:MT106053 | Organism:Severe | TAGAAAAGTGTGACCTTCAA | 20782 |
| gb:MT019533 | Organism:Severe | TAGAAAAGTGTGACCTTCAA | 20782 |
| gb:MT019531 | Organism:Severe | TAGAAAAGTGTGACCTTCAA | 20782 |
| gb:MN996528 | Organism:Severe | TAGAAAAGTGTGACCTTCAA | 20782 |
| gb:MN996530 | Organism:Severe | TAGAAAAGTGTGACCTTCAA | 20768 |
| gb:MN908947 | Organism:Severe | TAGAAAAGTGTGACCTTCAA | 20782 |
| gb:MT019532 | Organism:Severe | TAGAAAAGTGTGACCTTCAA | 20782 |

\*\*\*\*\*

|             |                 |                      |       |
|-------------|-----------------|----------------------|-------|
| gb:MT020781 | Organism:Severe | TGAATGTCGCAAAATATACT | 20830 |
| gb:MT007544 | Organism:Severe | TGAATGTCGCAAAATATACT | 20842 |
| gb:MN994467 | Organism:Severe | TGAATGTCGCAAAATATACT | 20842 |
| gb:MT044257 | Organism:Severe | TGAATGTCGCAAAATATACT | 20842 |
| gb:MT106054 | Organism:Severe | TGAATGTCGCAAAATATACT | 20842 |
| gb:MT049951 | Organism:Severe | TGAATGTCGCAAAATATACT | 20842 |
| gb:MN975262 | Organism:Severe | TGAATGTCGCAAAATATACT | 20842 |
| gb:MT106052 | Organism:Severe | TGAATGTCGCAAAATATACT | 20842 |
| gb:LC522975 | Organism:Severe | TGAATGTCGCAAAATATACT | 20839 |
| gb:LC522973 | Organism:Severe | TGAATGTCGCAAAATATACT | 20839 |
| gb:LC522974 | Organism:Severe | TGAATGTCGCAAAATATACT | 20839 |
| gb:MN985325 | Organism:Severe | TGAATGTCGCAAAATATACT | 20842 |
| gb:MT020881 | Organism:Severe | TGAATGTCGCAAAATATACT | 20842 |
| gb:MT020880 | Organism:Severe | TGAATGTCGCAAAATATACT | 20842 |
| gb:MT066175 | Organism:Severe | TGAATGTCGCAAAATATACT | 20842 |
| gb:MN997409 | Organism:Severe | TGAATGTCGCAAAATATACT | 20842 |
| gb:MN938384 | Organism:Severe | TGAATGTCGCAAAATATACT | 20810 |
| gb:MT044258 | Organism:Severe | TGAATGTCGCAAAATATACT | 20818 |
| gb:MT039890 | Organism:Severe | TGAATGTCGCAAAATATACT | 20842 |
| gb:MN988713 | Organism:Severe | TGAATGTCGCAAAATATACT | 20842 |
| gb:LC521925 | Organism:Severe | TGAATGTCGCAAAATATACT | 20815 |
| gb:MT093571 | Organism:Severe | TGAATGTCGCAAAATATACT | 20842 |
| gb:MT039887 | Organism:Severe | TGAATGTCGCAAAATATACT | 20839 |
| gb:MT019530 | Organism:Severe | TGAATGTCGCAAAATATACT | 20842 |

|             |                 |                                                              |       |
|-------------|-----------------|--------------------------------------------------------------|-------|
| gb:MT039888 | Organism:Severe | TGAATGTCGCAAAATATACTCAACTGTGTCAATATTTAAACACATTAACATTAGCTGTAC | 20842 |
| gb:LC522972 | Organism:Severe | TGAATGTCGCAAAATATACTCAACTGTGTCAATATTTAAACACATTAACATTAGCTGTAC | 20839 |
| gb:MT027063 | Organism:Severe | TGAATGTCGCAAAATATACTCAACTGTGTCAATATTTAAACACATTAACATTAGCTGTAC | 20842 |
| gb:MT027062 | Organism:Severe | TGAATGTCGCAAAATATACTCAACTGTGTCAATATTTAAACACATTAACATTAGCTGTAC | 20842 |
| gb:MT019529 | Organism:Severe | TGAATGTCGCAAAATATACTCAACTGTGTCAATATTTAAACACATTAACATTAGCTGTAC | 20842 |
| gb:MN996529 | Organism:Severe | TGAATGTCGCAAAATATACTCAACTGTGTCAATATTTAAACACATTAACATTAGCTGTAC | 20830 |
| gb:MN996531 | Organism:Severe | TGAATGTCGCAAAATATACTCAACTGTGTCAATATTTAAACACATTAACATTAGCTGTAC | 20829 |
| gb:MT066176 | Organism:Severe | TGAATGTCGCAAAATATACTCAACTGTGTCAATATTTAAACACATTAACATTAGCTGTAC | 20842 |
| gb:MT027064 | Organism:Severe | TGAATGTCGCAAAATATACTCAACTGTGTCAATATTTAAACACATTAACATTAGCTGTAC | 20842 |
| gb:MN994468 | Organism:Severe | TGAATGTCGCAAAATATACTCAACTGTGTCAATATTTAAACACATTAACATTAGCTGTAC | 20842 |
| gb:MT072688 | Organism:Severe | TGAATGTCGCAAAATATACTCAACTGTGTCAATATTTAAACACATTAACATTAGCTGTAC | 20827 |
| gb:MN996527 | Organism:Severe | TGAATGTCGCAAAATATACTCAACTGTGTCAATATTTAAACACATTAACATTAGCTGTAC | 20809 |
| gb:MT093631 | Organism:Severe | TGAATGTCGCAAAATATACTCAACTGTGTCAATATTTAAACACATTAACATTAGCTGTAC | 20880 |
| gb:MT106053 | Organism:Severe | TGAATGTCGCAAAATATACTCAACTGTGTCAATATTTAAACACATTAACATTAGCTGTAC | 20842 |
| gb:MT019533 | Organism:Severe | TGAATGTCGCAAAATATACTCAACTGTGTCAATATTTAAACACATTAACATTAGCTGTAC | 20842 |
| gb:MT019531 | Organism:Severe | TGAATGTCGCAAAATATACTCAACTGTGTCAATATTTAAACACATTAACATTAGCTGTAC | 20842 |
| gb:MN996528 | Organism:Severe | TGAATGTCGCAAAATATACTCAACTGTGTCAATATTTAAACACATTAACATTAGCTGTAC | 20842 |
| gb:MN996530 | Organism:Severe | TGAATGTCGCAAAATATACTCAACTGTGTCAATATTTAAACACATTAACATTAGCTGTAC | 20828 |
| gb:MN908947 | Organism:Severe | TGAATGTCGCAAAATATACTCAACTGTGTCAATATTTAAACACATTAACATTAGCTGTAC | 20842 |
| gb:MT019532 | Organism:Severe | TGAATGTCGCAAAATATACTCAACTGTGTCAATATTTAAACACATTAACATTAGCTGTAC | 20842 |

\*\*\*\*\*

|             |                 |                                                              |       |
|-------------|-----------------|--------------------------------------------------------------|-------|
| gb:MT020781 | Organism:Severe | CCTATAATATGAGAGTTATACATTTTGGTGCTGGTTCTGATAAAGGAGTTGCACCAGGTA | 20890 |
| gb:MT007544 | Organism:Severe | CCTATAATATGAGAGTTATACATTTTGGTGCTGGTTCTGATAAAGGAGTTGCACCAGGTA | 20902 |
| gb:MN994467 | Organism:Severe | CCTATAATATGAGAGTTATACATTTTGGTGCTGGTTCTGATAAAGGAGTTGCACCAGGTA | 20902 |
| gb:MT044257 | Organism:Severe | CCTATAATATGAGAGTTATACATTTTGGTGCTGGTTCTGATAAAGGAGTTGCACCAGGTA | 20902 |
| gb:MT106054 | Organism:Severe | CCTATAATATGAGAGTTATACATTTTGGTGCTGGTTCTGATAAAGGAGTTGCACCAGGTA | 20902 |
| gb:MT049951 | Organism:Severe | CCTATAATATGAGAGTTATACATTTTGGTGCTGGTTCTGATAAAGGAGTTGCACCAGGTA | 20902 |
| gb:MN975262 | Organism:Severe | CCTATAATATGAGAGTTATACATTTTGGTGCTGGTTCTGATAAAGGAGTTGCACCAGGTA | 20902 |
| gb:MT106052 | Organism:Severe | CCTATAATATGAGAGTTATACATTTTGGTGCTGGTTCTGATAAAGGAGTTGCACCAGGTA | 20902 |
| gb:LC522975 | Organism:Severe | CCTATAATATGAGAGTTATACATTTTGGTGCTGGTTCTGATAAAGGAGTTGCACCAGGTA | 20899 |
| gb:LC522973 | Organism:Severe | CCTATAATATGAGAGTTATACATTTTGGTGCTGGTTCTGATAAAGGAGTTGCACCAGGTA | 20899 |
| gb:LC522974 | Organism:Severe | CCTATAATATGAGAGTTATACATTTTGGTGCTGGTTCTGATAAAGGAGTTGCACCAGGTA | 20899 |
| gb:MN985325 | Organism:Severe | CCTATAATATGAGAGTTATACATTTTGGTGCTGGTTCTGATAAAGGAGTTGCACCAGGTA | 20902 |
| gb:MT020881 | Organism:Severe | CCTATAATATGAGAGTTATACATTTTGGTGCTGGTTCTGATAAAGGAGTTGCACCAGGTA | 20902 |
| gb:MT020880 | Organism:Severe | CCTATAATATGAGAGTTATACATTTTGGTGCTGGTTCTGATAAAGGAGTTGCACCAGGTA | 20902 |
| gb:MT066175 | Organism:Severe | CCTATAATATGAGAGTTATACATTTTGGTGCTGGTTCTGATAAAGGAGTTGCACCAGGTA | 20902 |
| gb:MN997409 | Organism:Severe | CCTATAATATGAGAGTTATACATTTTGGTGCTGGTTCTGATAAAGGAGTTGCACCAGGTA | 20902 |
| gb:MN938384 | Organism:Severe | CCTATAATATGAGAGTTATACATTTTGGTGCTGGTTCTGATAAAGGAGTTGCACCAGGTA | 20870 |
| gb:MT044258 | Organism:Severe | CCTATAATATGAGAGTTATACATTTTGGTGCTGGTTCTGATAAAGGAGTTGCACCAGGTA | 20878 |
| gb:MT039890 | Organism:Severe | CCTATAATATGAGAGTTATACATTTTGGTGCTGGTTCTGATAAAGGAGTTGCACCAGGTA | 20902 |
| gb:MN988713 | Organism:Severe | CCTATAATATGAGAGTTATACATTTTGGTGCTGGTTCTGATAAAGGAGTTGCACCAGGTA | 20902 |
| gb:LC521925 | Organism:Severe | CCTATAATATGAGAGTTATACATTTTGGTGCTGGTTCTGATAAAGGAGTTGCACCAGGTA | 20875 |
| gb:MT093571 | Organism:Severe | CCTATAATATGAGAGTTATACATTTTGGTGCTGGTTCTGATAAAGGAGTTGCACCAGGTA | 20902 |
| gb:MT039887 | Organism:Severe | CCTATAATATGAGAGTTATACATTTTGGTGCTGGTTCTGATAAAGGAGTTGCACCAGGTA | 20899 |
| gb:MT019530 | Organism:Severe | CCTATAATATGAGAGTTATACATTTTGGTGCTGGTTCTGATAAAGGAGTTGCACCAGGTA | 20902 |
| gb:MT039888 | Organism:Severe | CCTATAATATGAGAGTTATACATTTTGGTGCTGGTTCTGATAAAGGAGTTGCACCAGGTA | 20902 |
| gb:LC522972 | Organism:Severe | CCTATAATATGAGAGTTATACATTTTGGTGCTGGTTCTGATAAAGGAGTTGCACCAGGTA | 20899 |
| gb:MT027063 | Organism:Severe | CCTATAATATGAGAGTTATACATTTTGGTGCTGGTTCTGATAAAGGAGTTGCACCAGGTA | 20902 |
| gb:MT027062 | Organism:Severe | CCTATAATATGAGAGTTATACATTTTGGTGCTGGTTCTGATAAAGGAGTTGCACCAGGTA | 20902 |
| gb:MT019529 | Organism:Severe | CCTATAATATGAGAGTTATACATTTTGGTGCTGGTTCTGATAAAGGAGTTGCACCAGGTA | 20902 |
| gb:MN996529 | Organism:Severe | CCTATAATATGAGAGTTATACATTTTGGTGCTGGTTCTGATAAAGGAGTTGCACCAGGTA | 20890 |
| gb:MN996531 | Organism:Severe | CCTATAATATGAGAGTTATACATTTTGGTGCTGGTTCTGATAAAGGAGTTGCACCAGGTA | 20889 |
| gb:MT066176 | Organism:Severe | CCTATAATATGAGAGTTATACATTTTGGTGCTGGTTCTGATAAAGGAGTTGCACCAGGTA | 20902 |
| gb:MT027064 | Organism:Severe | CCTATAATATGAGAGTTATACATTTTGGTGCTGGTTCTGATAAAGGAGTTGCACCAGGTA | 20902 |
| gb:MN994468 | Organism:Severe | CCTATAATATGAGAGTTATACATTTTGGTGCTGGTTCTGATAAAGGAGTTGCACCAGGTA | 20902 |
| gb:MT072688 | Organism:Severe | CCTATAATATGAGAGTTATACATTTTGGTGCTGGTTCTGATAAAGGAGTTGCACCAGGTA | 20887 |
| gb:MN996527 | Organism:Severe | CCTATAATATGAGAGTTATACATTTTGGTGCTGGTTCTGATAAAGGAGTTGCACCAGGTA | 20869 |
| gb:MT093631 | Organism:Severe | CCTATAATATGAGAGTTATACATTTTGGTGCTGGTTCTGATAAAGGAGTTGCACCAGGTA | 20940 |
| gb:MT106053 | Organism:Severe | CCTATAATATGAGAGTTATACATTTTGGTGCTGGTTCTGATAAAGGAGTTGCACCAGGTA | 20902 |
| gb:MT019533 | Organism:Severe | CCTATAATATGAGAGTTATACATTTTGGTGCTGGTTCTGATAAAGGAGTTGCACCAGGTA | 20902 |
| gb:MT019531 | Organism:Severe | CCTATAATATGAGAGTTATACATTTTGGTGCTGGTTCTGATAAAGGAGTTGCACCAGGTA | 20902 |
| gb:MN996528 | Organism:Severe | CCTATAATATGAGAGTTATACATTTTGGTGCTGGTTCTGATAAAGGAGTTGCACCAGGTA | 20902 |
| gb:MN996530 | Organism:Severe | CCTATAATATGAGAGTTATACATTTTGGTGCTGGTTCTGATAAAGGAGTTGCACCAGGTA | 20888 |
| gb:MN908947 | Organism:Severe | CCTATAATATGAGAGTTATACATTTTGGTGCTGGTTCTGATAAAGGAGTTGCACCAGGTA | 20902 |



|             |                  |                                                                       |       |
|-------------|------------------|-----------------------------------------------------------------------|-------|
| gb:MT019532 | Organism: Severe | CCTATAATATGAGAGTTATACATTTTGGTGCTGGTCTGATAAAGGAGTTGCACCAGGTA<br>*****  | 20902 |
| gb:MT020781 | Organism: Severe | CAGCTGTTTTAAGACAGTGGTTGCCTACGGGTACGCTGCTTGTGCGATTAGATCTTAATG          | 20950 |
| gb:MT007544 | Organism: Severe | CAGCTGTTTTAAGACAGTGGTTGCCTACGGGTACGCTGCTTGTGCGATTAGATCTTAATG          | 20962 |
| gb:MN994467 | Organism: Severe | CAGCTGTTTTAAGACAGTGGTTGCCTACGGGTACGCTGCTTGTGCGATTAGATCTTAATG          | 20962 |
| gb:MT044257 | Organism: Severe | CAGCTGTTTTAAGACAGTGGTTGCCTACGGGTACGCTGCTTGTGCGATTAGATCTTAATG          | 20962 |
| gb:MT106054 | Organism: Severe | CAGCTGTTTTAAGACAGTGGTTGCCTACGGGTACGCTGCTTGTGCGATTAGATCTTAATG          | 20962 |
| gb:MT049951 | Organism: Severe | CAGCTGTTTTAAGACAGTGGTTGCCTACGGGTACGCTGCTTGTGCGATTAGATCTTAATG          | 20962 |
| gb:MN975262 | Organism: Severe | CAGCTGTTTTAAGACAGTGGTTGCCTACGGGTACGCTGCTTGTGCGATTAGATCTTAATG          | 20962 |
| gb:MT106052 | Organism: Severe | CAGCTGTTTTAAGACAGTGGTTGCCTACGGGTACGCTGCTTGTGCGATTAGATCTTAATG          | 20962 |
| gb:LC522975 | Organism: Severe | CAGCTGTTTTAAGACAGTGGTTGCCTACGGGTACGCTGCTTGTGCGATTAGATCTTAATG          | 20959 |
| gb:LC522973 | Organism: Severe | CAGCTGTTTTAAGACAGTGGTTGCCTACGGGTACGCTGCTTGTGCGATTAGATCTTAATG          | 20959 |
| gb:LC522974 | Organism: Severe | CAGCTGTTTTAAGACAGTGGTTGCCTACGGGTACGCTGCTTGTGCGATTAGATCTTAATG          | 20959 |
| gb:MN985325 | Organism: Severe | CAGCTGTTTTAAGACAGTGGTTGCCTACGGGTACGCTGCTTGTGCGATTAGATCTTAATG          | 20962 |
| gb:MT020881 | Organism: Severe | CAGCTGTTTTAAGACAGTGGTTGCCTACGGGTACGCTGCTTGTGCGATTAGATCTTAATG          | 20962 |
| gb:MT020880 | Organism: Severe | CAGCTGTTTTAAGACAGTGGTTGCCTACGGGTACGCTGCTTGTGCGATTAGATCTTAATG          | 20962 |
| gb:MT066175 | Organism: Severe | CAGCTGTTTTAAGACAGTGGTTGCCTACGGGTACGCTGCTTGTGCGATTAGATCTTAATG          | 20962 |
| gb:MN997409 | Organism: Severe | CAGCTGTTTTAAGACAGTGGTTGCCTACGGGTACGCTGCTTGTGCGATTAGATCTTAATG          | 20962 |
| gb:MN938384 | Organism: Severe | CAGCTGTTTTAAGACAGTGGTTGCCTACGGGTACGCTGCTTGTGCGATTAGATCTTAATG          | 20930 |
| gb:MT044258 | Organism: Severe | CAGCTGTTTTAAGACAGTGGTTGCCTACGGGTACGCTGCTTGTGCGATTAGATCTTAATG          | 20938 |
| gb:MT039890 | Organism: Severe | CAGCTGTTTTAAGACAGTGGTTGCCTACGGGTATGCTGCTTGTGCGATTAGATCTTAATG          | 20962 |
| gb:MN988713 | Organism: Severe | CAGCTGTTTTAAGACAGTGGTTGCCTACGGGTACGCTGCTTGTGCGATTAGATCTTAATG          | 20962 |
| gb:LC521925 | Organism: Severe | CAGCTGTTTTAAGACAGTGGTTGCCTACGGGTACGCTGCTTGTGCGATTAGATCTTAATG          | 20935 |
| gb:MT093571 | Organism: Severe | CAGCTGTTTTAAGACAGTGGTTGCCTACGGGTACGCTGCTTGTGCGATTAGATCTTAATG          | 20962 |
| gb:MT039887 | Organism: Severe | CAGCTGTTTTAAGACAGTGGTTGCCTACGGGTACGCTGCTTGTGCGATTAGATCTTAATG          | 20959 |
| gb:MT019530 | Organism: Severe | CAGCTGTTTTAAGACAGTGGTTGCCTACGGGTACGCTGCTTGTGCGATTAGATCTTAATG          | 20962 |
| gb:MT039888 | Organism: Severe | CAGCTGTTTTAAGACAGTGGTTGCCTACGGGTACGCTGCTTGTGCGATTAGATCTTAATG          | 20962 |
| gb:LC522972 | Organism: Severe | CAGCTGTTTTAAGACAGTGGTTGCCTACGGGTACGCTGCTTGTGCGATTAGATCTTAATG          | 20959 |
| gb:MT027063 | Organism: Severe | CAGCTGTTTTAAGACAGTGGTTGCCTACGGGTACGCTGCTTGTGCGATTAGATCTTAATG          | 20962 |
| gb:MT027062 | Organism: Severe | CAGCTGTTTTAAGACAGTGGTTGCCTACGGGTACGCTGCTTGTGCGATTAGATCTTAATG          | 20962 |
| gb:MT019529 | Organism: Severe | CAGCTGTTTTAAGACAGTGGTTGCCTACGGGTACGCTGCTTGTGCGATTAGATCTTAATG          | 20962 |
| gb:MN996529 | Organism: Severe | CAGCTGTTTTAAGACAGTGGTTGCCTACGGGTACGCTGCTTGTGCGATTAGATCTTAATG          | 20950 |
| gb:MN996531 | Organism: Severe | CAGCTGTTTTAAGACAGTGGTTGCCTACGGGTACGCTGCTTGTGCGATTAGATCTTAATG          | 20949 |
| gb:MT066176 | Organism: Severe | CAGCTGTTTTAAGACAGTGGTTGCCTACGGGTACGCTGCTTGTGCGATTAGATCTTAATG          | 20962 |
| gb:MT027064 | Organism: Severe | CAGCTGTTTTAAGACAGTGGTTGCCTACGGGTACGCTGCTTGTGCGATTAGATCTTAATG          | 20962 |
| gb:MN994468 | Organism: Severe | CAGCTGTTTTAAGACAGTGGTTGCCTACGGGTACGCTGCTTGTGCGATTAGATCTTAATG          | 20962 |
| gb:MT072688 | Organism: Severe | CAGCTGTTTTAAGACAGTGGTTGCCTACGGGTACGCTGCTTGTGCGATTAGATCTTAATG          | 20947 |
| gb:MN996527 | Organism: Severe | CAGCTGTTTTAAGACAGTGGTTGCCTACGGGTACGCTGCTTGTGCGATTAGATCTTAATG          | 20929 |
| gb:MT093631 | Organism: Severe | CAGCTGTTTTAAGACAGTGGTTGCCTACGGGTACGCTGCTTGTGCGATTAGATCTTAATG          | 21000 |
| gb:MT106053 | Organism: Severe | CAGCTGTTTTAAGACAGTGGTTGCCTACGGGTACGCTGCTTGTGCGATTAGATCTTAATG          | 20962 |
| gb:MT019533 | Organism: Severe | CAGCTGTTTTAAGACAGTGGTTGCCTACGGGTACGCTGCTTGTGCGATTAGATCTTAATG          | 20962 |
| gb:MT019531 | Organism: Severe | CAGCTGTTTTAAGACAGTGGTTGCCTACGGGTACGCTGCTTGTGCGATTAGATCTTAATG          | 20962 |
| gb:MN996528 | Organism: Severe | CAGCTGTTTTAAGACAGTGGTTGCCTACGGGTACGCTGCTTGTGCGATTAGATCTTAATG          | 20962 |
| gb:MN996530 | Organism: Severe | CAGCTGTTTTAAGACAGTGGTTGCCTACGGGTACGCTGCTTGTGCGATTAGATCTTAATG          | 20948 |
| gb:MN908947 | Organism: Severe | CAGCTGTTTTAAGACAGTGGTTGCCTACGGGTACGCTGCTTGTGCGATTAGATCTTAATG          | 20962 |
| gb:MT019532 | Organism: Severe | CAGCTGTTTTAAGACAGTGGTTGCCTACGGGTACGCTGCTTGTGCGATTAGATCTTAATG<br>***** | 20962 |

|             |                  |                                                              |       |
|-------------|------------------|--------------------------------------------------------------|-------|
| gb:MT020781 | Organism: Severe | ACTTTGTCTCTGATGCAGATTCAACTTTGATTGGTGATTGTGCAACTGTACATACAGCTA | 21010 |
| gb:MT007544 | Organism: Severe | ACTTTGTCTCTGATGCAGATTCAACTTTGATTGGTGATTGTGCAACTGTACATACAGCTA | 21022 |
| gb:MN994467 | Organism: Severe | ACTTTGTCTCTGATGCAGATTCAACTTTGATTGGTGATTGTGCAACTGTACATACAGCTA | 21022 |
| gb:MT044257 | Organism: Severe | ACTTTGTCTCTGATGCAGATTCAACTTTGATTGGTGATTGTGCAACTGTACATACAGCTA | 21022 |
| gb:MT106054 | Organism: Severe | ACTTTGTCTCTGATGCAGATTCAACTTTGATTGGTGATTGTGCAACTGTACATACAGCTA | 21022 |
| gb:MT049951 | Organism: Severe | ACTTTGTCTCTGATGCAGATTCAACTTTGATTGGTGATTGTGCAACTGTACATACAGCTA | 21022 |
| gb:MN975262 | Organism: Severe | ACTTTGTCTCTGATGCAGATTCAACTTTGATTGGTGATTGTGCAACTGTACATACAGCTA | 21022 |
| gb:MT106052 | Organism: Severe | ACTTTGTCTCTGATGCAGATTCAACTTTGATTGGTGATTGTGCAACTGTACATACAGCTA | 21022 |
| gb:LC522975 | Organism: Severe | ACTTTGTCTCTGATGCAGATTCAACTTTGATTGGTGATTGTGCAACTGTACATACAGCTA | 21019 |
| gb:LC522973 | Organism: Severe | ACTTTGTCTCTGATGCAGATTCAACTTTGATTGGTGATTGTGCAACTGTACATACAGCTA | 21019 |
| gb:LC522974 | Organism: Severe | ACTTTGTCTCTGATGCAGATTCAACTTTGATTGGTGATTGTGCAACTGTACATACAGCTA | 21019 |
| gb:MN985325 | Organism: Severe | ACTTTGTCTCTGATGCAGATTCAACTTTGATTGGTGATTGTGCAACTGTACATACAGCTA | 21022 |
| gb:MT020881 | Organism: Severe | ACTTTGTCTCTGATGCAGATTCAACTTTGATTGGTGATTGTGCAACTGTACATACAGCTA | 21022 |
| gb:MT020880 | Organism: Severe | ACTTTGTCTCTGATGCAGATTCAACTTTGATTGGTGATTGTGCAACTGTACATACAGCTA | 21022 |
| gb:MT066175 | Organism: Severe | ACTTTGTCTCTGATGCAGATTCAACTTTGATTGGTGATTGTGCAACTGTACATACAGCTA | 21022 |
| gb:MN997409 | Organism: Severe | ACTTTGTCTCTGATGCAGATTCAACTTTGATTGGTGATTGTGCAACTGTACATACAGCTA | 21022 |



|             |                 |                                                             |       |
|-------------|-----------------|-------------------------------------------------------------|-------|
| gb:MN996527 | Organism:Severe | ATAAATGGGATCTCATTATTAGTGATATGTACGACCTAAGACTAAAAATGTTACAAAAG | 21049 |
| gb:MT093631 | Organism:Severe | ATAAATGGGATCTCATTATTAGTGATATGTACGACCTAAGACTAAAAATGTTACAAAAG | 21120 |
| gb:MT106053 | Organism:Severe | ATAAATGGGATCTCATTATTAGTGATATGTACGACCTAAGACTAAAAATGTTACAAAAG | 21082 |
| gb:MT019533 | Organism:Severe | ATAAATGGGATCTCATTATTAGTGATATGTACGACCTAAGACTAAAAATGTTACAAAAG | 21082 |
| gb:MT019531 | Organism:Severe | ATAAATGGGATCTCATTATTAGTGATATGTACGACCTAAGACTAAAAATGTTACAAAAG | 21082 |
| gb:MN996528 | Organism:Severe | ATAAATGGGATCTCATTATTAGTGATATGTACGACCTAAGACTAAAAATGTTACAAAAG | 21082 |
| gb:MN996530 | Organism:Severe | ATAAATGGGATCTCATTATTAGTGATATGTACGACCTAAGACTAAAAATGTTACAAAAG | 21068 |
| gb:MN908947 | Organism:Severe | ATAAATGGGATCTCATTATTAGTGATATGTACGACCTAAGACTAAAAATGTTACAAAAG | 21082 |
| gb:MT019532 | Organism:Severe | ATAAATGGGATCTCATTATTAGTGATATGTACGACCTAAGACTAAAAATGTTACAAAAG | 21082 |

\*\*\*\*\*

|             |                 |                                                             |       |
|-------------|-----------------|-------------------------------------------------------------|-------|
| gb:MT020781 | Organism:Severe | AAAATGACTCTAAAGAGGGTTTTTCACCTACATTTGTGGGTTTATACAACAAAAGCTAG | 21130 |
| gb:MT007544 | Organism:Severe | AAAATGACTCTAAAGAGGGTTTTTCACCTACATTTGTGGGTTTATACAACAAAAGCTAG | 21142 |
| gb:MN994467 | Organism:Severe | AAAATGACTCTAAAGAGGGTTTTTCACCTACATTTGTGGGTTTATACAACAAAAGCTAG | 21142 |
| gb:MT044257 | Organism:Severe | AAAATGACTCTAAAGAGGGTTTTTCACCTACATTTGTGGGTTTATACAACAAAAGCTAG | 21142 |
| gb:MT106054 | Organism:Severe | AAAATGACTCTAAAGAGGGTTTTTCACCTACATTTGTGGGTTTATACAACAAAAGCTAG | 21142 |
| gb:MT049951 | Organism:Severe | AAAATGACTCTAAAGAGGGTTTTTCACCTACATTTGTGGGTTTATACAACAAAAGCTAG | 21142 |
| gb:MN975262 | Organism:Severe | AAAATGACTCTAAAGAGGGTTTTTCACCTACATTTGTGGGTTTATACAACAAAAGCTAG | 21142 |
| gb:MT106052 | Organism:Severe | AAAATGACTCTAAAGAGGGTTTTTCACCTACATTTGTGGGTTTATACAACAAAAGCTAG | 21142 |
| gb:LC522975 | Organism:Severe | AAAATGACTCTAAAGAGGGTTTTTCACCTACATTTGTGGGTTTATACAACAAAAGCTAG | 21139 |
| gb:LC522973 | Organism:Severe | AAAATGACTCTAAAGAGGGTTTTTCACCTACATTTGTGGGTTTATACAACAAAAGCTAG | 21139 |
| gb:LC522974 | Organism:Severe | AAAATGACTCTAAAGAGGGTTTTTCACCTACATTTGTGGGTTTATACAACAAAAGCTAG | 21139 |
| gb:MN985325 | Organism:Severe | AAAATGACTCTAAAGAGGGTTTTTCACCTACATTTGTGGGTTTATACAACAAAAGCTAG | 21142 |
| gb:MT020881 | Organism:Severe | AAAATGACTCTAAAGAGGGTTTTTCACCTACATTTGTGGGTTTATACAACAAAAGCTAG | 21142 |
| gb:MT020880 | Organism:Severe | AAAATGACTCTAAAGAGGGTTTTTCACCTACATTTGTGGGTTTATACAACAAAAGCTAG | 21142 |
| gb:MT066175 | Organism:Severe | AAAATGACTCTAAAGAGGGTTTTTCACCTACATTTGTGGGTTTATACAACAAAAGCTAG | 21142 |
| gb:MN997409 | Organism:Severe | AAAATGACTCTAAAGAGGGTTTTTCACCTACATTTGTGGGTTTATACAACAAAAGCTAG | 21142 |
| gb:MN938384 | Organism:Severe | AAAATGACTCTAAAGAGGGTTTTTCACCTACATTTGTGGGTTTATACAACAAAAGCTAG | 21110 |
| gb:MT044258 | Organism:Severe | AAAATGACTCTAAAGAGGGTTTTTCACCTACATTTGTGGGTTTATACAACAAAAGCTAG | 21118 |
| gb:MT039890 | Organism:Severe | AAAATGACTCTAAAGAGGGTTTTTCACCTACATTTGTGGGTTTATACAACAAAAGCTAG | 21142 |
| gb:MN988713 | Organism:Severe | AAAATGACTCTAAAGAGGGTTTTTCACCTACATTTGTGGGTTTATACAACAAAAGCTAG | 21142 |
| gb:LC521925 | Organism:Severe | AAAATGACTCTAAAGAGGGTTTTTCACCTACATTTGTGGGTTTATACAACAAAAGCTAG | 21115 |
| gb:MT093571 | Organism:Severe | AAAATGACTCTAAAGAGGGTTTTTCACCTACATTTGTGGGTTTATACAACAAAAGCTAG | 21142 |
| gb:MT039887 | Organism:Severe | AAAATGACTCTAAAGAGGGTTTTTCACCTACATTTGTGGGTTTATACAACAAAAGCTAG | 21139 |
| gb:MT019530 | Organism:Severe | AAAATGACTCTAAAGAGGGTTTTTCACCTACATTTGTGGGTTTATACAACAAAAGCTAG | 21142 |
| gb:MT039888 | Organism:Severe | AAAATGACTCTAAAGAGGGTTTTTCACCTACATTTGTGGGTTTATACAACAAAAGCTAG | 21142 |
| gb:LC522972 | Organism:Severe | AAAATGACTCTAAAGAGGGTTTTTCACCTACATTTGTGGGTTTATACAACAAAAGCTAG | 21139 |
| gb:MT027063 | Organism:Severe | AAAATGACTCTAAAGAGGGTTTTTCACCTACATTTGTGGGTTTATACAACAAAAGCTAG | 21142 |
| gb:MT027062 | Organism:Severe | AAAATGACTCTAAAGAGGGTTTTTCACCTACATTTGTGGGTTTATACAACAAAAGCTAG | 21142 |
| gb:MT019529 | Organism:Severe | AAAATGACTCTAAAGAGGGTTTTTCACCTACATTTGTGGGTTTATACAACAAAAGCTAG | 21142 |
| gb:MN996529 | Organism:Severe | AAAATGACTCTAAAGAGGGTTTTTCACCTACATTTGTGGGTTTATACAACAAAAGCTAG | 21130 |
| gb:MN996531 | Organism:Severe | AAAATGACTCTAAAGAGGGTTTTTCACCTACATTTGTGGGTTTATACAACAAAAGCTAG | 21129 |
| gb:MT066176 | Organism:Severe | AAAATGACTCTAAAGAGGGTTTTTCACCTACATTTGTGGGTTTATACAACAAAAGCTAG | 21142 |
| gb:MT027064 | Organism:Severe | AAAATGACTCTAAAGAGGGTTTTTCACCTACATTTGTGGGTTTATACAACAAAAGCTAG | 21142 |
| gb:MN994468 | Organism:Severe | AAAATGACTCTAAAGAGGGTTTTTCACCTACATTTGTGGGTTTATACAACAAAAGCTAG | 21142 |
| gb:MT072688 | Organism:Severe | AAAATGACTCTAAAGAGGGTTTTTCACCTACATTTGTGGGTTTATACAACAAAAGCTAG | 21127 |
| gb:MN996527 | Organism:Severe | AAAATGACTCTAAAGAGGGTTTTTCACCTACATTTGTGGGTTTATACAACAAAAGCTAG | 21109 |
| gb:MT093631 | Organism:Severe | AAAATGACTCTAAAGAGGGTTTTTCACCTACATTTGTGGGTTTATACAACAAAAGCTAG | 21180 |
| gb:MT106053 | Organism:Severe | AAAATGACTCTAAAGAGGGTTTTTCACCTACATTTGTGGGTTTATACAACAAAAGCTAG | 21142 |
| gb:MT019533 | Organism:Severe | AAAATGACTCTAAAGAGGGTTTTTCACCTACATTTGTGGGTTTATACAACAAAAGCTAG | 21142 |
| gb:MT019531 | Organism:Severe | AAAATGACTCTAAAGAGGGTTTTTCACCTACATTTGTGGGTTTATACAACAAAAGCTAG | 21142 |
| gb:MN996528 | Organism:Severe | AAAATGACTCTAAAGAGGGTTTTTCACCTACATTTGTGGGTTTATACAACAAAAGCTAG | 21142 |
| gb:MN996530 | Organism:Severe | AAAATGACTCTAAAGAGGGTTTTTCACCTACATTTGTGGGTTTATACAACAAAAGCTAG | 21128 |
| gb:MN908947 | Organism:Severe | AAAATGACTCTAAAGAGGGTTTTTCACCTACATTTGTGGGTTTATACAACAAAAGCTAG | 21142 |
| gb:MT019532 | Organism:Severe | AAAATGACTCTAAAGAGGGTTTTTCACCTACATTTGTGGGTTTATACAACAAAAGCTAG | 21142 |

\*\*\*\*\*

|             |                 |                                                               |       |
|-------------|-----------------|---------------------------------------------------------------|-------|
| gb:MT020781 | Organism:Severe | CTCTTGGAGGTTCCGTGGCTATAAAGATAACAGAACATTCTTGGAAATGCTGATCTTTATA | 21190 |
| gb:MT007544 | Organism:Severe | CTCTTGGAGGTTCCGTGGCTATAAAGATAACAGAACATTCTTGGAAATGCTGATCTTTATA | 21202 |
| gb:MN994467 | Organism:Severe | CTCTTGGAGGTTCCGTGGCTATAAAGATAACAGAACATTCTTGGAAATGCTGATCTTTATA | 21202 |
| gb:MT044257 | Organism:Severe | CTCTTGGAGGTTCCGTGGCTATAAAGATAACAGAACATTCTTGGAAATGCTGATCTTTATA | 21202 |
| gb:MT106054 | Organism:Severe | CTCTTGGAGGTTCCGTGGCTATAAAGATAACAGAACATTCTTGGAAATGCTGATCTTTATA | 21202 |
| gb:MT049951 | Organism:Severe | CTCTTGGAGGTTCCGTGGCTATAAAGATAACAGAACATTCTTGGAAATGCTGATCTTTATA | 21202 |
| gb:MN975262 | Organism:Severe | CTCTTGGAGGTTCCGTGGCTATAAAGATAACAGAACATTCTTGGAAATGCTGATCTTTATA | 21202 |
| gb:MT106052 | Organism:Severe | CTCTTGGAGGTTCCGTGGCTATAAAGATAACAGAACATTCTTGGAAATGCTGATCTTTATA | 21202 |

|             |                 |                                                               |       |
|-------------|-----------------|---------------------------------------------------------------|-------|
| gb:LC522975 | Organism:Severe | CTCTTGGAGGTTCCGTGGCTATAAAGATAACAGAACATTCTTGGAAATGCTGATCTTTATA | 21199 |
| gb:LC522973 | Organism:Severe | CTCTTGGAGGTTCCGTGGCTATAAAGATAACAGAACATTCTTGGAAATGCTGATCTTTATA | 21199 |
| gb:LC522974 | Organism:Severe | CTCTTGGAGGTTCCGTGGCTATAAAGATAACAGAACATTCTTGGAAATGCTGATCTTTATA | 21199 |
| gb:MN985325 | Organism:Severe | CTCTTGGAGGTTCCGTGGCTATAAAGATAACAGAACATTCTTGGAAATGCTGATCTTTATA | 21202 |
| gb:MT020881 | Organism:Severe | CTCTTGGAGGTTCCGTGGCTATAAAGATAACAGAACATTCTTGGAAATGCTGATCTTTATA | 21202 |
| gb:MT020880 | Organism:Severe | CTCTTGGAGGTTCCGTGGCTATAAAGATAACAGAACATTCTTGGAAATGCTGATCTTTATA | 21202 |
| gb:MT066175 | Organism:Severe | CTCTTGGAGGTTCCGTGGCTATAAAGATAACAGAACATTCTTGGAAATGCTGATCTTTATA | 21202 |
| gb:MN997409 | Organism:Severe | CTCTTGGAGGTTCCGTGGCTATAAAGATAACAGAACATTCTTGGAAATGCTGATCTTTATA | 21202 |
| gb:MN938384 | Organism:Severe | CTCTTGGAGGTTCCGTGGCTATAAAGATAACAGAACATTCTTGGAAATGCTGATCTTTATA | 21170 |
| gb:MT044258 | Organism:Severe | CTCTTGGAGGTTCCGTGGCTATAAAGATAACAGAACATTCTTGGAAATGCTGATCTTTATA | 21178 |
| gb:MT039890 | Organism:Severe | CTCTTGGAGGTTCCGTGGCTATAAAGATAACAGAACATTCTTGGAAATGCTGATCTTTATA | 21202 |
| gb:MN988713 | Organism:Severe | CTCTTGGAGGTTCCGTGGCTATAAAGATAACAGAACATTCTTGGAAATGCTGATCTTTATA | 21202 |
| gb:LC521925 | Organism:Severe | CTCTTGGAGGTTCCGTGGCTATAAAGATAACAGAACATTCTTGGAAATGCTGATCTTTATA | 21175 |
| gb:MT093571 | Organism:Severe | CTCTTGGAGGTTCCGTGGCTATAAAGATAACAGAACATTCTTGGAAATGCTGATCTTTATA | 21202 |
| gb:MT039887 | Organism:Severe | CTCTTGGAGGTTCCGTGGCTATAAAGATAACAGAACATTCTTGGAAATGCTGATCTTTATA | 21199 |
| gb:MT019530 | Organism:Severe | CTCTTGGAGGTTCCGTGGCTATAAAGATAACAGAACATTCTTGGAAATGCTGATCTTTATA | 21202 |
| gb:MT039888 | Organism:Severe | CTCTTGGAGGTTCCGTGGCTATAAAGATAACAGAACATTCTTGGAAATGCTGATCTTTATA | 21202 |
| gb:LC522972 | Organism:Severe | CTCTTGGAGGTTCCGTGGCTATAAAGATAACAGAACATTCTTGGAAATGCTGATCTTTATA | 21199 |
| gb:MT027063 | Organism:Severe | CTCTTGGAGGTTCCGTGGCTATAAAGATAACAGAACATTCTTGGAAATGCTGATCTTTATA | 21202 |
| gb:MT027062 | Organism:Severe | CTCTTGGAGGTTCCGTGGCTATAAAGATAACAGAACATTCTTGGAAATGCTGATCTTTATA | 21202 |
| gb:MT019529 | Organism:Severe | CTCTTGGAGGTTCCGTGGCTATAAAGATAACAGAACATTCTTGGAAATGCTGATCTTTATA | 21202 |
| gb:MN996529 | Organism:Severe | CTCTTGGAGGTTCCGTGGCTATAAAGATAACAGAACATTCTTGGAAATGCTGATCTTTATA | 21190 |
| gb:MN996531 | Organism:Severe | CTCTTGGAGGTTCCGTGGCTATAAAGATAACAGAACATTCTTGGAAATGCTGATCTTTATA | 21189 |
| gb:MT066176 | Organism:Severe | CTCTTGGAGGTTCCGTGGCTATAAAGATAACAGAACATTCTTGGAAATGCTGATCTTTATA | 21202 |
| gb:MT027064 | Organism:Severe | CTCTTGGAGGTTCCGTGGCTATAAAGATAACAGAACATTCTTGGAAATGCTGATCTTTATA | 21202 |
| gb:MN994468 | Organism:Severe | CTCTTGGAGGTTCCGTGGCTATAAAGATAACAGAACATTCTTGGAAATGCTGATCTTTATA | 21202 |
| gb:MT072688 | Organism:Severe | CTCTTGGAGGTTCCGTGGCTATAAAGATAACAGAACATTCTTGGAAATGCTGATCTTTATA | 21187 |
| gb:MN996527 | Organism:Severe | CTCTTGGAGGTTCCGTGGCTATAAAGATAACAGAACATTCTTGGAAATGCTGATCTTTATA | 21169 |
| gb:MT093631 | Organism:Severe | CTCTTGGAGGTTCCGTGGCTATAAAGATAACAGAACATTCTTGGAAATGCTGATCTTTATA | 21240 |
| gb:MT106053 | Organism:Severe | CTCTTGGAGGTTCCGTGGCTATAAAGATAACAGAACATTCTTGGAAATGCTGATCTTTATA | 21202 |
| gb:MT019533 | Organism:Severe | CTCTTGGAGGTTCCGTGGCTATAAAGATAACAGAACATTCTTGGAAATGCTGATCTTTATA | 21202 |
| gb:MT019531 | Organism:Severe | CTCTTGGAGGTTCCGTGGCTATAAAGATAACAGAACATTCTTGGAAATGCTGATCTTTATA | 21202 |
| gb:MN996528 | Organism:Severe | CTCTTGGAGGTTCCGTGGCTATAAAGATAACAGAACATTCTTGGAAATGCTGATCTTTATA | 21202 |
| gb:MN996530 | Organism:Severe | CTCTTGGAGGTTCCGTGGCTATAAAGATAACAGAACATTCTTGGAAATGCTGATCTTTATA | 21188 |
| gb:MN908947 | Organism:Severe | CTCTTGGAGGTTCCGTGGCTATAAAGATAACAGAACATTCTTGGAAATGCTGATCTTTATA | 21202 |
| gb:MT019532 | Organism:Severe | CTCTTGGAGGTTCCGTGGCTATAAAGATAACAGAACATTCTTGGAAATGCTGATCTTTATA | 21202 |

\*\*\*\*\*

|             |                 |                                                              |       |
|-------------|-----------------|--------------------------------------------------------------|-------|
| gb:MT020781 | Organism:Severe | AGCTCATGGGACACTTCGCATGGTGGACAGCCTTTGTTACTAATGTGAATGCGTCATCAT | 21250 |
| gb:MT007544 | Organism:Severe | AGCTCATGGGACACTTCGCATGGTGGACAGCCTTTGTTACTAATGTGAATGCGTCATCAT | 21262 |
| gb:MN994467 | Organism:Severe | AGCTCATGGGACACTTCGCATGGTGGACAGCCTTTGTTACTAATGTGAATGCGTCATCAT | 21262 |
| gb:MT044257 | Organism:Severe | AGCTCATGGGACACTTCGCATGGTGGACAGCCTTTGTTACTAATGTGAATGCGTCATCAT | 21262 |
| gb:MT106054 | Organism:Severe | AGCTCATGGGACACTTCGCATGGTGGACAGCCTTTGTTACTAATGTGAATGCGTCATCAT | 21262 |
| gb:MT049951 | Organism:Severe | AGCTCATGGGACACTTCGCATGGTGGACAGCCTTTGTTACTAATGTGAATGCGTCATCAT | 21262 |
| gb:MN975262 | Organism:Severe | AGCTCATGGGACACTTCGCATGGTGGACAGCCTTTGTTACTAATGTGAATGCGTCATCAT | 21262 |
| gb:MT106052 | Organism:Severe | AGCTCATGGGACACTTCGCATGGTGGACAGCCTTTGTTACTAATGTGAATGCGTCATCAT | 21262 |
| gb:LC522975 | Organism:Severe | AGCTCATGGGACACTTCGCATGGTGGACAGCCTTTGTTACTAATGTGAATGCGTCATCAT | 21259 |
| gb:LC522973 | Organism:Severe | AGCTCATGGGACACTTCGCATGGTGGACAGCCTTTGTTACTAATGTGAATGCGTCATCAT | 21259 |
| gb:LC522974 | Organism:Severe | AGCTCATGGGACACTTCGCATGGTGGACAGCCTTTGTTACTAATGTGAATGCGTCATCAT | 21259 |
| gb:MN985325 | Organism:Severe | AGCTCATGGGACACTTCGCATGGTGGACAGCCTTTGTTACTAATGTGAATGCGTCATCAT | 21262 |
| gb:MT020881 | Organism:Severe | AGCTCATGGGACACTTCGCATGGTGGACAGCCTTTGTTACTAATGTGAATGCGTCATCAT | 21262 |
| gb:MT020880 | Organism:Severe | AGCTCATGGGACACTTCGCATGGTGGACAGCCTTTGTTACTAATGTGAATGCGTCATCAT | 21262 |
| gb:MT066175 | Organism:Severe | AGCTCATGGGACACTTCGCATGGTGGACAGCCTTTGTTACTAATGTGAATGCGTCATCAT | 21262 |
| gb:MN997409 | Organism:Severe | AGCTCATGGGACACTTCGCATGGTGGACAGCCTTTGTTACTAATGTGAATGCGTCATCAT | 21262 |
| gb:MN938384 | Organism:Severe | AGCTCATGGGACACTTCGCATGGTGGACAGCCTTTGTTACTAATGTGAATGCGTCATCAT | 21230 |
| gb:MT044258 | Organism:Severe | AGCTCATGGGACACTTCGCATGGTGGACAGCCTTTGTTACTAATGTGAATGCGTCATCAT | 21238 |
| gb:MT039890 | Organism:Severe | AGCTCATGGGACACTTCGCATGGTGGACAGCCTTTGTTACTAATGTGAATGCGTCATCAT | 21262 |
| gb:MN988713 | Organism:Severe | AGCTCATGGGACACTTCGCATGGTGGACAGCCTTTGTTACTAATGTGAATGCGTCATCAT | 21262 |
| gb:LC521925 | Organism:Severe | AGCTCATGGGACACTTCGCATGGTGGACAGCCTTTGTTACTAATGTGAATGCGTCATCAT | 21235 |
| gb:MT093571 | Organism:Severe | AGCTCATGGGACACTTCGCATGGTGGACAGCCTTTGTTACTAATGTGAATGCGTCATCAT | 21262 |
| gb:MT039887 | Organism:Severe | AGCTCATGGGACACTTCGCATGGTGGACAGCCTTTGTTACTAATGTGAATGCGTCATCAT | 21259 |
| gb:MT019530 | Organism:Severe | AGCTCATGGGACACTTCGCATGGTGGACAGCCTTTGTTACTAATGTGAATGCGTCATCAT | 21262 |
| gb:MT039888 | Organism:Severe | AGCTCATGGGACACTTCGCATGGTGGACAGCCTTTGTTACTAATGTGAATGCGTCATCAT | 21262 |
| gb:LC522972 | Organism:Severe | AGCTCATGGGACACTTCGCATGGTGGACAGCCTTTGTTACTAATGTGAATGCGTCATCAT | 21259 |
| gb:MT027063 | Organism:Severe | AGCTCATGGGACACTTCGCATGGTGGACAGCCTTTGTTACTAATGTGAATGCGTCATCAT | 21262 |

|             |                 |                                                              |       |
|-------------|-----------------|--------------------------------------------------------------|-------|
| gb:MT027062 | Organism:Severe | AGCTCATGGGACACTTCGCATGGTGGACAGCCTTTGTTACTAATGTGAATGCGTCATCAT | 21262 |
| gb:MT019529 | Organism:Severe | AGCTCATGGGACACTTCGCATGGTGGACAGCCTTTGTTACTAATGTGAATGCGTCATCAT | 21262 |
| gb:MN996529 | Organism:Severe | AGCTCATGGGACACTTCGCATGGTGGACAGCCTTTGTTACTAATGTGAATGCGTCATCAT | 21250 |
| gb:MN996531 | Organism:Severe | AGCTCATGGGACACTTCGCATGGTGGACAGCCTTTGTTACTAATGTGAATGCGTCATCAT | 21249 |
| gb:MT066176 | Organism:Severe | AGCTCATGGGACACTTCGCATGGTGGACAGCCTTTGTTACTAATGTGAATGCGTCATCAT | 21262 |
| gb:MT027064 | Organism:Severe | AGCTCATGGGACACTTCGCATGGTGGACAGCCTTTGTTACTAATGTGAATGCGTCATCAT | 21262 |
| gb:MN994468 | Organism:Severe | AGCTCATGGGACACTTCGCATGGTGGACAGCCTTTGTTACTAATGTGAATGCGTCATCAT | 21262 |
| gb:MT072688 | Organism:Severe | AGCTCATGGGACACTTCGCATGGTGGACAGCCTTTGTTACTAATGTGAATGCGTCATCAT | 21247 |
| gb:MN996527 | Organism:Severe | AGCTCATGGGACACTTCGCATGGTGGACAGCCTTTGTTACTAATGTGAATGCGTCATCAT | 21229 |
| gb:MT093631 | Organism:Severe | AGCTCATGGGACACTTCGCATGGTGGACAGCCTTTGTTACTAATGTGAATGCGTCATCAT | 21300 |
| gb:MT106053 | Organism:Severe | AGCTCATGGGACACTTCGCATGGTGGACAGCCTTTGTTACTAATGTGAATGCGTCATCAT | 21262 |
| gb:MT019533 | Organism:Severe | AGCTCATGGGACACTTCGCATGGTGGACAGCCTTTGTTACTAATGTGAATGCGTCATCAT | 21262 |
| gb:MT019531 | Organism:Severe | AGCTCATGGGACACTTCGCATGGTGGACAGCCTTTGTTACTAATGTGAATGCGTCATCAT | 21262 |
| gb:MN996528 | Organism:Severe | AGCTCATGGGACACTTCGCATGGTGGACAGCCTTTGTTACTAATGTGAATGCGTCATCAT | 21262 |
| gb:MN996530 | Organism:Severe | AGCTCATGGGACACTTCGCATGGTGGACAGCCTTTGTTACTAATGTGAATGCGTCATCAT | 21248 |
| gb:MN908947 | Organism:Severe | AGCTCATGGGACACTTCGCATGGTGGACAGCCTTTGTTACTAATGTGAATGCGTCATCAT | 21262 |
| gb:MT019532 | Organism:Severe | AGCTCATGGGACACTTCGCATGGTGGACAGCCTTTGTTACTAATGTGAATGCGTCATCAT | 21262 |

\*\*\*\*\*

|             |                 |                                                            |       |
|-------------|-----------------|------------------------------------------------------------|-------|
| gb:MT020781 | Organism:Severe | CTGAAGCATTTTTAATTGGATGTAATTATCTTGGCAAACACGCGAACAATAGATGGTT | 21310 |
| gb:MT007544 | Organism:Severe | CTGAAGCATTTTTAATTGGATGTAATTATCTTGGCAAACACGCGAACAATAGATGGTT | 21322 |
| gb:MN994467 | Organism:Severe | CTGAAGCATTTTTAATTGGATGTAATTATCTTGGCAAACACGCGAACAATAGATGGTT | 21322 |
| gb:MT044257 | Organism:Severe | CTGAAGCATTTTTAATTGGATGTAATTATCTTGGCAAACACGCGAACAATAGATGGTT | 21322 |
| gb:MT106054 | Organism:Severe | CTGAAGCATTTTTAATTGGATGTAATTATCTTGGCAAACACGCGAACAATAGATGGTT | 21322 |
| gb:MT049951 | Organism:Severe | CTGAAGCATTTTTAATTGGATGTAATTATCTTGGCAAACACGCGAACAATAGATGGTT | 21322 |
| gb:MN975262 | Organism:Severe | CTGAAGCATTTTTAATTGGATGTAATTATCTTGGCAAACACGCGAACAATAGATGGTT | 21322 |
| gb:MT106052 | Organism:Severe | CTGAAGCATTTTTAATTGGATGTAATTATCTTGGCAAACACGCGAACAATAGATGGTT | 21322 |
| gb:LC522975 | Organism:Severe | CTGAAGCATTTTTAATTGGATGTAATTATCTTGGCAAACACGCGAACAATAGATGGTT | 21319 |
| gb:LC522973 | Organism:Severe | CTGAAGCATTTTTAATTGGATGTAATTATCTTGGCAAACACGCGAACAATAGATGGTT | 21319 |
| gb:LC522974 | Organism:Severe | CTGAAGCATTTTTAATTGGATGTAATTATCTTGGCAAACACGCGAACAATAGATGGTT | 21319 |
| gb:MN985325 | Organism:Severe | CTGAAGCATTTTTAATTGGATGTAATTATCTTGGCAAACACGCGAACAATAGATGGTT | 21322 |
| gb:MT020881 | Organism:Severe | CTGAAGCATTTTTAATTGGATGTAATTATCTTGGCAAACACGCGAACAATAGATGGTT | 21322 |
| gb:MT020880 | Organism:Severe | CTGAAGCATTTTTAATTGGATGTAATTATCTTGGCAAACACGCGAACAATAGATGGTT | 21322 |
| gb:MT066175 | Organism:Severe | CTGAAGCATTTTTAATTGGATGTAATTATCTTGGCAAACACGCGAACAATAGATGGTT | 21322 |
| gb:MN997409 | Organism:Severe | CTGAAGCATTTTTAATTGGATGTAATTATCTTGGCAAACACGCGAACAATAGATGGTT | 21322 |
| gb:MN938384 | Organism:Severe | CTGAAGCATTTTTAATTGGATGTAATTATCTTGGCAAACACGCGAACAATAGATGGTT | 21290 |
| gb:MT044258 | Organism:Severe | CTGAAGCATTTTTAATTGGATGTAATTATCTTGGCAAACACGCGAACAATAGATGGTT | 21298 |
| gb:MT039890 | Organism:Severe | CTGAAGCATTTTTAATTGGATGTAATTATCTTGGCAAACACGCGAACAATAGATGGTT | 21322 |
| gb:MN988713 | Organism:Severe | CTGAAGCATTTTTAATTGGATGTAATTATCTTGGCAAACACGCGAACAATAGATGGTT | 21322 |
| gb:LC521925 | Organism:Severe | CTGAAGCATTTTTAATTGGATGTAATTATCTTGGCAAACACGCGAACAATAGATGGTT | 21295 |
| gb:MT093571 | Organism:Severe | CTGAAGCATTTTTAATTGGATGTAATTATCTTGGCAAACACGCGAACAATAGATGGTT | 21322 |
| gb:MT039887 | Organism:Severe | CTGAAGCATTTTTAATTGGATGTAATTATCTTGGCAAACACGCGAACAATAGATGGTT | 21319 |
| gb:MT019530 | Organism:Severe | CTGAAGCATTTTTAATTGGATGTAATTATCTTGGCAAACACGCGAACAATAGATGGTT | 21322 |
| gb:MT039888 | Organism:Severe | CTGAAGCATTTTTAATTGGATGTAATTATCTTGGCAAACACGCGAACAATAGATGGTT | 21322 |
| gb:LC522972 | Organism:Severe | CTGAAGCATTTTTAATTGGATGTAATTATCTTGGCAAACACGCGAACAATAGATGGTT | 21319 |
| gb:MT027063 | Organism:Severe | CTGAAGCATTTTTAATTGGATGTAATTATCTTGGCAAACACGCGAACAATAGATGGTT | 21322 |
| gb:MT027062 | Organism:Severe | CTGAAGCATTTTTAATTGGATGTAATTATCTTGGCAAACACGCGAACAATAGATGGTT | 21322 |
| gb:MT019529 | Organism:Severe | CTGAAGCATTTTTAATTGGATGTAATTATCTTGGCAAACACGCGAACAATAGATGGTT | 21322 |
| gb:MN996529 | Organism:Severe | CTGAAGCATTTTTAATTGGATGTAATTATCTTGGCAAACACGCGAACAATAGATGGTT | 21310 |
| gb:MN996531 | Organism:Severe | CTGAAGCATTTTTAATTGGATGTAATTATCTTGGCAAACACGCGAACAATAGATGGTT | 21309 |
| gb:MT066176 | Organism:Severe | CTGAAGCATTTTTAATTGGATGTAATTATCTTGGCAAACACGCGAACAATAGATGGTT | 21322 |
| gb:MT027064 | Organism:Severe | CTGAAGCATTTTTAATTGGATGTAATTATCTTGGCAAACACGCGAACAATAGATGGTT | 21322 |
| gb:MN994468 | Organism:Severe | CTGAAGCATTTTTAATTGGATGTAATTATCTTGGCAAACACGCGAACAATAGATGGTT | 21322 |
| gb:MT072688 | Organism:Severe | CTGAAGCATTTTTAATTGGATGTAATTATCTTGGCAAACACGCGAACAATAGATGGTT | 21307 |
| gb:MN996527 | Organism:Severe | CTGAAGCATTTTTAATTGGATGTAATTATCTTGGCAAACACGCGAACAATAAATGGTT | 21289 |
| gb:MT093631 | Organism:Severe | CTGAAGCATTTTTAATTGGATGTAATTATCTTGGCAAACACGCGAACAATAGATGGTT | 21360 |
| gb:MT106053 | Organism:Severe | CTGAAGCATTTTTAATTGGATGTAATTATCTTGGCAAACACGCGAACAATAGATGGTT | 21322 |
| gb:MT019533 | Organism:Severe | CTGAAGCATTTTTAATTGGATGTAATTATCTTGGCAAACACGCGAACAATAGATGGTT | 21322 |
| gb:MT019531 | Organism:Severe | CTGAAGCATTTTTAATTGGATGTAATTATCTTGGCAAACACGCGAACAATAGATGGTT | 21322 |
| gb:MN996528 | Organism:Severe | CTGAAGCATTTTTAATTGGATGTAATTATCTTGGCAAACACGCGAACAATAGATGGTT | 21322 |
| gb:MN996530 | Organism:Severe | CTGAAGCATTTTTAATTGGATGTAATTATCTTGGCAAACACGCGAACAATAGATGGTT | 21308 |
| gb:MN908947 | Organism:Severe | CTGAAGCATTTTTAATTGGATGTAATTATCTTGGCAAACACGCGAACAATAGATGGTT | 21322 |
| gb:MT019532 | Organism:Severe | CTGAAGCATTTTTAATTGGATGTAATTATCTTGGCAAACACGCGAACAATAGATGGTT | 21322 |

\*\*\*\*\*

|             |                 |                                                             |       |
|-------------|-----------------|-------------------------------------------------------------|-------|
| gb:MT020781 | Organism:Severe | ATGTCATGCATGCAAATACATATTTTGGAGGAATACAAATCCAATTCAGTTGTCTTCCT | 21370 |
| gb:MT007544 | Organism:Severe | ATGTCATGCATGCAAATACATATTTTGGAGGAATACAAATCCAATTCAGTTGTCTTCCT | 21382 |
| gb:MN994467 | Organism:Severe | ATGTCATGCATGCAAATACATATTTTGGAGGAATACAAATCCAATTCAGTTGTCTTCCT | 21382 |
| gb:MT044257 | Organism:Severe | ATGTCATGCATGCAAATACATATTTTGGAGGAATACAAATCCAATTCAGTTGTCTTCCT | 21382 |
| gb:MT106054 | Organism:Severe | ATGTCATGCATGCAAATACATATTTTGGAGGAATACAAATCCAATTCAGTTGTCTTCCT | 21382 |
| gb:MT049951 | Organism:Severe | ATGTCATGCATGCAAATACATATTTTGGAGGAATACAAATCCAATTCAGTTGTCTTCCT | 21382 |
| gb:MN975262 | Organism:Severe | ATGTCATGCATGCAAATACATATTTTGGAGGAATACAAATCCAATTCAGTTGTCTTCCT | 21382 |
| gb:MT106052 | Organism:Severe | ATGTCATGCATGCAAATACATATTTTGGAGGAATACAAATCCAATTCAGTTGTCTTCCT | 21382 |
| gb:LC522975 | Organism:Severe | ATGTCATGCATGCAAATACATATTTTGGAGGAATACAAATCCAATTCAGTTGTCTTCCT | 21379 |
| gb:LC522973 | Organism:Severe | ATGTCATGCATGCAAATACATATTTTGGAGGAATACAAATCCAATTCAGTTGTCTTCCT | 21379 |
| gb:LC522974 | Organism:Severe | ATGTCATGCATGCAAATACATATTTTGGAGGAATACAAATCCAATTCAGTTGTCTTCCT | 21379 |
| gb:MN985325 | Organism:Severe | ATGTCATGCATGCAAATACATATTTTGGAGGAATACAAATCCAATTCAGTTGTCTTCCT | 21382 |
| gb:MT020881 | Organism:Severe | ATGTCATGCATGCAAATACATATTTTGGAGGAATACAAATCCAATTCAGTTGTCTTCCT | 21382 |
| gb:MT020880 | Organism:Severe | ATGTCATGCATGCAAATACATATTTTGGAGGAATACAAATCCAATTCAGTTGTCTTCCT | 21382 |
| gb:MT066175 | Organism:Severe | ATGTCATGCATGCAAATACATATTTTGGAGGAATACAAATCCAATTCAGTTGTCTTCCT | 21382 |
| gb:MN997409 | Organism:Severe | ATGTCATGCATGCAAATACATATTTTGGAGGAATACAAATCCAATTCAGTTGTCTTCCT | 21382 |
| gb:MN938384 | Organism:Severe | ATGTCATGCATGCAAATACATATTTTGGAGGAATACAAATCCAATTCAGTTGTCTTCCT | 21350 |
| gb:MT044258 | Organism:Severe | ATGTCATGCATGCAAATACATATTTTGGAGGAATACAAATCCAATTCAGTTGTCTTCCT | 21358 |
| gb:MT039890 | Organism:Severe | ATGTCATGCATGCAAATACATATTTTGGAGGAATACAAATCCAATTCAGTTGTCTTCCT | 21382 |
| gb:MN988713 | Organism:Severe | ATGTCATGCATGCAAATACATATTTTGGAGGAATACAAATCCAATTCAGTTGTCTTCCT | 21382 |
| gb:LC521925 | Organism:Severe | ATGTCATGCATGCAAATACATATTTTGGAGGAATACAAATCCAATTCAGTTGTCTTCCT | 21355 |
| gb:MT093571 | Organism:Severe | ATGTCATGCATGCAAATACATATTTTGGAGGAATACAAATCCAATTCAGTTGTCTTCCT | 21382 |
| gb:MT039887 | Organism:Severe | ATGTCATGCATGCAAATACATATTTTGGAGGAATACAAATCCAATTCAGTTGTCTTCCT | 21379 |
| gb:MT019530 | Organism:Severe | ATGTCATGCATGCAAATACATATTTTGGAGGAATACAAATCCAATTCAGTTGTCTTCCT | 21382 |
| gb:MT039888 | Organism:Severe | ATGTCATGCATGCAAATACATATTTTGGAGGAATACAAATCCAATTCAGTTGTCTTCCT | 21382 |
| gb:LC522972 | Organism:Severe | ATGTCATGCATGCAAATACATATTTTGGAGGAATACAAATCCAATTCAGTTGTCTTCCT | 21379 |
| gb:MT027063 | Organism:Severe | ATGTCATGCATGCAAATACATATTTTGGAGGAATACAAATCCAATTCAGTTGTCTTCCT | 21382 |
| gb:MT027062 | Organism:Severe | ATGTCATGCATGCAAATACATATTTTGGAGGAATACAAATCCAATTCAGTTGTCTTCCT | 21382 |
| gb:MT019529 | Organism:Severe | ATGTCATGCATGCAAATACATATTTTGGAGGAATACAAATCCAATTCAGTTGTCTTCCT | 21382 |
| gb:MN996529 | Organism:Severe | ATGTCATGCATGCAAATACATATTTTGGAGGAATACAAATCCAATTCAGTTGTCTTCCT | 21370 |
| gb:MN996531 | Organism:Severe | ATGTCATGCATGCAAATACATATTTTGGAGGAATACAAATCCAATTCAGTTGTCTTCCT | 21369 |
| gb:MT066176 | Organism:Severe | ATGTCATGCATGCAAATACATATTTTGGAGGAATACAAATCCAATTCAGTTGTCTTCCT | 21382 |
| gb:MT027064 | Organism:Severe | ATGTCATGCATGCAAATACATATTTTGGAGGAATACAAATCCAATTCAGTTGTCTTCCT | 21382 |
| gb:MN994468 | Organism:Severe | ATGTCATGCATGCAAATACATATTTTGGAGGAATACAAATCCAATTCAGTTGTCTTCCT | 21382 |
| gb:MT072688 | Organism:Severe | ATGTCATGCATGCAAATACATATTTTGGAGGAATACAAATCCAATTCAGTTGTCTTCCT | 21367 |
| gb:MN996527 | Organism:Severe | ATGTCATGCATGCAAATACATATTTTGGAGGAATACAAATCCAATTCAGTTGTCTTCCT | 21349 |
| gb:MT093631 | Organism:Severe | ATGTCATGCATGCAAATACATATTTTGGAGGAATACAAATCCAATTCAGTTGTCTTCCT | 21420 |
| gb:MT106053 | Organism:Severe | ATGTCATGCATGCAAATACATATTTTGGAGGAATACAAATCCAATTCAGTTGTCTTCCT | 21382 |
| gb:MT019533 | Organism:Severe | ATGTCATGCATGCAAATACATATTTTGGAGGAATACAAATCCAATTCAGTTGTCTTCCT | 21382 |
| gb:MT019531 | Organism:Severe | ATGTCATGCATGCAAATACATATTTTGGAGGAATACAAATCCAATTCAGTTGTCTTCCT | 21382 |
| gb:MN996528 | Organism:Severe | ATGTCATGCATGCAAATACATATTTTGGAGGAATACAAATCCAATTCAGTTGTCTTCCT | 21382 |
| gb:MN996530 | Organism:Severe | ATGTCATGCATGCAAATACATATTTTGGAGGAATACAAATCCAATTCAGTTGTCTTCCT | 21368 |
| gb:MN908947 | Organism:Severe | ATGTCATGCATGCAAATACATATTTTGGAGGAATACAAATCCAATTCAGTTGTCTTCCT | 21382 |
| gb:MT019532 | Organism:Severe | ATGTCATGCATGCAAATACATATTTTGGAGGAATACAAATCCAATTCAGTTGTCTTCCT | 21382 |

\*\*\*\*\*

|             |                 |                                                              |       |
|-------------|-----------------|--------------------------------------------------------------|-------|
| gb:MT020781 | Organism:Severe | ATTCCTTTATTTGACATGAGTAAATTTCCCCTTAAATTAAGGGGACTGCTGTTATGTCTT | 21430 |
| gb:MT007544 | Organism:Severe | ATTCCTTTATTTGACATGAGTAAATTTCCCCTTAAATTAAGGGGACTGCTGTTATGTCTT | 21442 |
| gb:MN994467 | Organism:Severe | ATTCCTTTATTTGACATGAGTAAATTTCCCCTTAAATTAAGGGGACTGCTGTTATGTCTT | 21442 |
| gb:MT044257 | Organism:Severe | ATTCCTTTATTTGACATGAGTAAATTTCCCCTTAAATTAAGGGGACTGCTGTTATGTCTT | 21442 |
| gb:MT106054 | Organism:Severe | ATTCCTTTATTTGACATGAGTAAATTTCCCCTTAAATTAAGGGGACTGCTGTTATGTCTT | 21442 |
| gb:MT049951 | Organism:Severe | ATTCCTTTATTTGACATGAGTAAATTTCCCCTTAAATTAAGGGGACTGCTGTTATGTCTT | 21442 |
| gb:MN975262 | Organism:Severe | ATTCCTTTATTTGACATGAGTAAATTTCCCCTTAAATTAAGGGGACTGCTGTTATGTCTT | 21442 |
| gb:MT106052 | Organism:Severe | ATTCCTTTATTTGACATGAGTAAATTTCCCCTTAAATTAAGGGGACTGCTGTTATGTCTT | 21442 |
| gb:LC522975 | Organism:Severe | ATTCCTTTATTTGACATGAGTAAATTTCCCCTTAAATTAAGGGGACTGCTGTTATGTCTT | 21439 |
| gb:LC522973 | Organism:Severe | ATTCCTTTATTTGACATGAGTAAATTTCCCCTTAAATTAAGGGGACTGCTGTTATGTCTT | 21439 |
| gb:LC522974 | Organism:Severe | ATTCCTTTATTTGACATGAGTAAATTTCCCCTTAAATTAAGGGGACTGCTGTTATGTCTT | 21439 |
| gb:MN985325 | Organism:Severe | ATTCCTTTATTTGACATGAGTAAATTTCCCCTTAAATTAAGGGGACTGCTGTTATGTCTT | 21442 |
| gb:MT020881 | Organism:Severe | ATTCCTTTATTTGACATGAGTAAATTTCCCCTTAAATTAAGGGGACTGCTGTTATGTCTT | 21442 |
| gb:MT020880 | Organism:Severe | ATTCCTTTATTTGACATGAGTAAATTTCCCCTTAAATTAAGGGGACTGCTGTTATGTCTT | 21442 |
| gb:MT066175 | Organism:Severe | ATTCCTTTATTTGACATGAGTAAATTTCCCCTTAAATTAAGGGGACTGCTGTTATGTCTT | 21442 |
| gb:MN997409 | Organism:Severe | ATTCCTTTATTTGACATGAGTAAATTTCCCCTTAAATTAAGGGGACTGCTGTTATGTCTT | 21442 |
| gb:MN938384 | Organism:Severe | ATTCCTTTATTTGACATGAGTAAATTTCCCCTTAAATTAAGGGGACTGCTGTTATGTCTT | 21410 |
| gb:MT044258 | Organism:Severe | ATTCCTTTATTTGACATGAGTAAATTTCCCCTTAAATTAAGGGGACTGCTGTTATGTCTT | 21418 |
| gb:MT039890 | Organism:Severe | ATTCCTTTATTTGACATGAGTAAATTTCCCCTTAAATTAAGGGGACTGCTGTTATGTCTT | 21442 |

|             |                 |                                                            |       |
|-------------|-----------------|------------------------------------------------------------|-------|
| gb:MN988713 | Organism:Severe | ATTCTTTATTTGACATGAGTAAATTTCCCTTAAATTAAGGGGACTGCTGTTATGTCTT | 21442 |
| gb:LC521925 | Organism:Severe | ATTCTTTATTTGACATGAGTAAATTTCCCTTAAATTAAGGGGACTGCTGTTATGTCTT | 21415 |
| gb:MT093571 | Organism:Severe | ATTCTTTATTTGACATGAGTAAATTTCCCTTAAATTAAGGGGACTGCTGTTATGTCTT | 21442 |
| gb:MT039887 | Organism:Severe | ATTCTTTATTTGACATGAGTAAATTTCCCTTAAATTAAGGGGACTGCTGTTATGTCTT | 21439 |
| gb:MT019530 | Organism:Severe | ATTCTTTATTTGACATGAGTAAATTTCCCTTAAATTAAGGGGACTGCTGTTATGTCTT | 21442 |
| gb:MT039888 | Organism:Severe | ATTCTTTATTTGACATGAGTAAATTTCCCTTAAATTAAGGGGACTGCTGTTATGTCTT | 21442 |
| gb:LC522972 | Organism:Severe | ATTCTTTATTTGACATGAGTAAATTTCCCTTAAATTAAGGGGACTGCTGTTATGTCTT | 21439 |
| gb:MT027063 | Organism:Severe | ATTCTTTATTTGACATGAGTAAATTTCCCTTAAATTAAGGGGACTGCTGTTATGTCTT | 21442 |
| gb:MT027062 | Organism:Severe | ATTCTTTATTTGACATGAGTAAATTTCCCTTAAATTAAGGGGACTGCTGTTATGTCTT | 21442 |
| gb:MT019529 | Organism:Severe | ATTCTTTATTTGACATGAGTAAATTTCCCTTAAATTAAGGGGACTGCTGTTATGTCTT | 21442 |
| gb:MN996529 | Organism:Severe | ATTCTTTATTTGACATGAGTAAATTTCCCTTAAATTAAGGGGACTGCTGTTATGTCTT | 21430 |
| gb:MN996531 | Organism:Severe | ATTCTTTATTTGACATGAGTAAATTTCCCTTAAATTAAGGGGACTGCTGTTATGTCTT | 21429 |
| gb:MT066176 | Organism:Severe | ATTCTTTATTTGACATGAGTAAATTTCCCTTAAATTAAGGGGACTGCTGTTATGTCTT | 21442 |
| gb:MT027064 | Organism:Severe | ATTCTTTATTTGACATGAGTAAATTTCCCTTAAATTAAGGGGACTGCTGTTATGTCTT | 21442 |
| gb:MN994468 | Organism:Severe | ATTCTTTATTTGACATGAGTAAATTTCCCTTAAATTAAGGGGACTGCTGTTATGTCTT | 21442 |
| gb:MT072688 | Organism:Severe | ATTCTTTATTTGACATGAGTAAATTTCCCTTAAATTAAGGGGACTGCTGTTATGTCTT | 21427 |
| gb:MN996527 | Organism:Severe | ATTCTTTATTTGACATGAGTAAATTTCCCTTAAATTAAGGGGACTGCTGTTATGTCTT | 21409 |
| gb:MT093631 | Organism:Severe | ATTCTTTATTTGACATGAGTAAATTTCCCTTAAATTAAGGGGACTGCTGTTATGTCTT | 21480 |
| gb:MT106053 | Organism:Severe | ATTCTTTATTTGACATGAGTAAATTTCCCTTAAATTAAGGGGACTGCTGTTATGTCTT | 21442 |
| gb:MT019533 | Organism:Severe | ATTCTTTATTTGACATGAGTAAATTTCCCTTAAATTAAGGGGACTGCTGTTATGTCTT | 21442 |
| gb:MT019531 | Organism:Severe | ATTCTTTATTTGACATGAGTAAATTTCCCTTAAATTAAGGGGACTGCTGTTATGTCTT | 21442 |
| gb:MN996528 | Organism:Severe | ATTCTTTATTTGACATGAGTAAATTTCCCTTAAATTAAGGGGACTGCTGTTATGTCTT | 21442 |
| gb:MN996530 | Organism:Severe | ATTCTTTATTTGACATGAGTAAATTTCCCTTAAATTAAGGGGACTGCTGTTATGTCTT | 21428 |
| gb:MN908947 | Organism:Severe | ATTCTTTATTTGACATGAGTAAATTTCCCTTAAATTAAGGGGACTGCTGTTATGTCTT | 21442 |
| gb:MT019532 | Organism:Severe | ATTCTTTATTTGACATGAGTAAATTTCCCTTAAATTAAGGGGACTGCTGTTATGTCTT | 21442 |

\*\*\*\*\*

|             |                 |                                                              |       |
|-------------|-----------------|--------------------------------------------------------------|-------|
| gb:MT020781 | Organism:Severe | TAAAAGAAGGTCAAATCAATGATATGATTTTATCTCTTCTTAGTAAAGGTAGACTTATAA | 21490 |
| gb:MT007544 | Organism:Severe | TAAAAGAAGGTCAAATCAATGATATGATTTTATCTCTTCTTAGTAAAGGTAGACTTATAA | 21502 |
| gb:MN994467 | Organism:Severe | TAAAAGAAGGTCAAATCAATGATATGATTTTATCTCTTCTTAGTAAAGGTAGACTTATAA | 21502 |
| gb:MT044257 | Organism:Severe | TAAAAGAAGGTCAAATCAATGATATGATTTTATCTCTTCTTAGTAAAGGTAGACTTATAA | 21502 |
| gb:MT106054 | Organism:Severe | TAAAAGAAGGTCAAATCAATGATATGATTTTATCTCTTCTTAGTAAAGGTAGACTTATAA | 21502 |
| gb:MT049951 | Organism:Severe | TAAAAGAAGGTCAAATCAATGATATGATTTTATCTCTTCTTAGTAAAGGTAGACTTATAA | 21502 |
| gb:MN975262 | Organism:Severe | TAAAAGAAGGTCAAATCAATGATATGATTTTATCTCTTCTTAGTAAAGGTAGACTTATAA | 21502 |
| gb:MT106052 | Organism:Severe | TAAAAGAAGGTCAAATCAATGATATGATTTTATCTCTTCTTAGTAAAGGTAGACTTATAA | 21502 |
| gb:LC522975 | Organism:Severe | TAAAAGAAGGTCAAATCAATGATATGATTTTATCTCTTCTTAGTAAAGGTAGACTTATAA | 21499 |
| gb:LC522973 | Organism:Severe | TAAAAGAAGGTCAAATCAATGATATGATTTTATCTCTTCTTAGTAAAGGTAGACTTATAA | 21499 |
| gb:LC522974 | Organism:Severe | TAAAAGAAGGTCAAATCAATGATATGATTTTATCTCTTCTTAGTAAAGGTAGACTTATAA | 21499 |
| gb:MN985325 | Organism:Severe | TAAAAGAAGGTCAAATCAATGATATGATTTTATCTCTTCTTAGTAAAGGTAGACTTATAA | 21502 |
| gb:MT020881 | Organism:Severe | TAAAAGAAGGTCAAATCAATGATATGATTTTATCTCTTCTTAGTAAAGGTAGACTTATAA | 21502 |
| gb:MT020880 | Organism:Severe | TAAAAGAAGGTCAAATCAATGATATGATTTTATCTCTTCTTAGTAAAGGTAGACTTATAA | 21502 |
| gb:MT066175 | Organism:Severe | TAAAAGAAGGTCAAATCAATGATATGATTTTATCTCTTCTTAGTAAAGGTAGACTTATAA | 21502 |
| gb:MN997409 | Organism:Severe | TAAAAGAAGGTCAAATCAATGATATGATTTTATCTCTTCTTAGTAAAGGTAGACTTATAA | 21502 |
| gb:MN938384 | Organism:Severe | TAAAAGAAGGTCAAATCAATGATATGATTTTATCTCTTCTTAGTAAAGGTAGACTTATAA | 21470 |
| gb:MT044258 | Organism:Severe | TAAAAGAAGGTCAAATCAATGATATGATTTTATCTCTTCTTAGTAAAGGTAGACTTATAA | 21478 |
| gb:MT039890 | Organism:Severe | TAAAAGAAGGTCAAATCAATGATATGATTTTATCTCTTCTTAGTAAAGGTAGACTTATAA | 21502 |
| gb:MN988713 | Organism:Severe | TAAAAGAAGGTCAAATCAATGATATGATTTTATCTCTTCTTAGTAAAGGTAGACTTATAA | 21502 |
| gb:LC521925 | Organism:Severe | TAAAAGAAGGTCAAATCAATGATATGATTTTATCTCTTCTTAGTAAAGGTAGACTTATAA | 21475 |
| gb:MT093571 | Organism:Severe | TAAAAGAAGGTCAAATCAATGATATGATTTTATCTCTTCTTAGTAAAGGTAGACTTATAA | 21502 |
| gb:MT039887 | Organism:Severe | TAAAAGAAGGTCAAATCAATGATATGATTTTATCTCTTCTTAGTAAAGGTAGACTTATAA | 21499 |
| gb:MT019530 | Organism:Severe | TAAAAGAAGGTCAAATCAATGATATGATTTTATCTCTTCTTAGTAAAGGTAGACTTATAA | 21502 |
| gb:MT039888 | Organism:Severe | TAAAAGAAGGTCAAATCAATGATATGATTTTATCTCTTCTTAGTAAAGGTAGACTTATAA | 21502 |
| gb:LC522972 | Organism:Severe | TAAAAGAAGGTCAAATCAATGATATGATTTTATCTCTTCTTAGTAAAGGTAGACTTATAA | 21499 |
| gb:MT027063 | Organism:Severe | TAAAAGAAGGTCAAATCAATGATATGATTTTATCTCTTCTTAGTAAAGGTAGACTTATAA | 21502 |
| gb:MT027062 | Organism:Severe | TAAAAGAAGGTCAAATCAATGATATGATTTTATCTCTTCTTAGTAAAGGTAGACTTATAA | 21502 |
| gb:MT019529 | Organism:Severe | TAAAAGAAGGTCAAATCAATGATATGATTTTATCTCTTCTTAGTAAAGGTAGACTTATAA | 21502 |
| gb:MN996529 | Organism:Severe | TAAAAGAAGGTCAAATCAATGATATGATTTTATCTCTTCTTAGTAAAGGTAGACTTATAA | 21490 |
| gb:MN996531 | Organism:Severe | TAAAAGAAGGTCAAATCAATGATATGATTTTATCTCTTCTTAGTAAAGGTAGACTTATAA | 21489 |
| gb:MT066176 | Organism:Severe | TAAAAGAAGGTCAAATCAATGATATGATTTTATCTCTTCTTAGTAAAGGTAGACTTATAA | 21502 |
| gb:MT027064 | Organism:Severe | TAAAAGAAGGTCAAATCAATGATATGATTTTATCTCTTCTTAGTAAAGGTAGACTTATAA | 21502 |
| gb:MN994468 | Organism:Severe | TAAAAGAAGGTCAAATCAATGATATGATTTTATCTCTTCTTAGTAAAGGTAGACTTATAA | 21502 |
| gb:MT072688 | Organism:Severe | TAAAAGAAGGTCAAATCAATGATATGATTTTATCTCTTCTTAGTAAAGGTAGACTTATAA | 21487 |
| gb:MN996527 | Organism:Severe | TAAAAGAAGGTCAAATCAATGATATGATTTTATCTCTTCTTAGTAAAGGTAGACTTATAA | 21469 |
| gb:MT093631 | Organism:Severe | TAAAAGAAGGTCAAATCAATGATATGATTTTATCTCTTCTTAGTAAAGGTAGACTTATAA | 21540 |
| gb:MT106053 | Organism:Severe | TAAAAGAAGGTCAAATCAATGATATGATTTTATCTCTTCTTAGTAAAGGTAGACTTATAA | 21502 |

|             |                 |                                                              |       |
|-------------|-----------------|--------------------------------------------------------------|-------|
| gb:MT019533 | Organism:Severe | TAAAAGAAGGTCAAATCAATGATATGATTTTATCTCTTCTTAGTAAAGGTAGACTTATAA | 21502 |
| gb:MT019531 | Organism:Severe | TAAAAGAAGGTCAAATCAATGATATGATTTTATCTCTTCTTAGTAAAGGTAGACTTATAA | 21502 |
| gb:MN996528 | Organism:Severe | TAAAAGAAGGTCAAATCAATGATATGATTTTATCTCTTCTTAGTAAAGGTAGACTTATAA | 21502 |
| gb:MN996530 | Organism:Severe | TAAAAGAAGGTCAAATCAATGATATGATTTTATCTCTTCTTAGTAAAGGTAGACTTATAA | 21488 |
| gb:MN908947 | Organism:Severe | TAAAAGAAGGTCAAATCAATGATATGATTTTATCTCTTCTTAGTAAAGGTAGACTTATAA | 21502 |
| gb:MT019532 | Organism:Severe | TAAAAGAAGGTCAAATCAATGATATGATTTTATCTCTTCTTAGTAAAGGTAGACTTATAA | 21502 |

\*\*\*\*\*

|             |                 |                                                              |       |
|-------------|-----------------|--------------------------------------------------------------|-------|
| gb:MT020781 | Organism:Severe | TTAGAGAAAACAACAGAGTTGTTATTTCTAGTGATGTTCTTGTTAAACAATAAACGAACA | 21550 |
| gb:MT007544 | Organism:Severe | TTAGAGAAAACAACAGAGTTGTTATTTCTAGTGATGTTCTTGTTAAACAATAAACGAACA | 21562 |
| gb:MN994467 | Organism:Severe | TTAGAGAAAACAACAGAGTTGTTATTTCTAGTGATGTTCTTGTTAAACAATAAACGAACA | 21562 |
| gb:MT044257 | Organism:Severe | TTAGAGAAAACAACAGAGTTGTTATTTCTAGTGATGTTCTTGTTAAACAATAAACGAACA | 21562 |
| gb:MT106054 | Organism:Severe | TTAGAGAAAACAACAGAGTTGTTATTTCTAGTGATGTTCTTGTTAAACAATAAACGAACA | 21562 |
| gb:MT049951 | Organism:Severe | TTAGAGAAAACAACAGAGTTGTTATTTCTAGTGATGTTCTTGTTAAACAATAAACGAACA | 21562 |
| gb:MN975262 | Organism:Severe | TTAGAGAAAACAACAGAGTTGTTATTTCTAGTGATGTTCTTGTTAAACAATAAACGAACA | 21562 |
| gb:MT106052 | Organism:Severe | TTAGAGAAAACAACAGAGTTGTTATTTCTAGTGATGTTCTTGTTAAACAATAAACGAACA | 21562 |
| gb:LC522975 | Organism:Severe | TTAGAGAAAACAACAGAGTTGTTATTTCTAGTGATGTTCTTGTTAAACAATAAACGAACA | 21559 |
| gb:LC522973 | Organism:Severe | TTAGAGAAAACAACAGAGTTGTTATTTCTAGTGATGTTCTTGTTAAACAATAAACGAACA | 21559 |
| gb:LC522974 | Organism:Severe | TTAGAGAAAACAACAGAGTTGTTATTTCTAGTGATGTTCTTGTTAAACAATAAACGAACA | 21559 |
| gb:MN985325 | Organism:Severe | TTAGAGAAAACAACAGAGTTGTTATTTCTAGTGATGTTCTTGTTAAACAATAAACGAACA | 21562 |
| gb:MT020881 | Organism:Severe | TTAGAGAAAACAACAGAGTTGTTATTTCTAGTGATGTTCTTGTTAAACAATAAACGAACA | 21562 |
| gb:MT020880 | Organism:Severe | TTAGAGAAAACAACAGAGTTGTTATTTCTAGTGATGTTCTTGTTAAACAATAAACGAACA | 21562 |
| gb:MT066175 | Organism:Severe | TTAGAGAAAACAACAGAGTTGTTATTTCTAGTGATGTTCTTGTTAAACAATAAACGAACA | 21562 |
| gb:MN997409 | Organism:Severe | TTAGAGAAAACAACAGAGTTGTTATTTCTAGTGATGTTCTTGTTAAACAATAAACGAACA | 21562 |
| gb:MN938384 | Organism:Severe | TTAGAGAAAACAACAGAGTTGTTATTTCTAGTGATGTTCTTGTTAAACAATAAACGAACA | 21530 |
| gb:MT044258 | Organism:Severe | TTAGAGAAAACAACAGAGTTGTTATTTCTAGTGATGTTCTTGTTAAACAATAAACGAACA | 21538 |
| gb:MT039890 | Organism:Severe | TTAGAGAAAACAACAGAGTTGTTATTTCTAGTGATGTTCTTGTTAAACAATAAACGAACA | 21562 |
| gb:MN988713 | Organism:Severe | TTAGAGAAAACAACAGAGTTGTTATTTCTAGTGATGTTCTTGTTAAACAATAAACGAACA | 21562 |
| gb:LC521925 | Organism:Severe | TTAGAGAAAACAACAGAGTTGTTATTTCTAGTGATGTTCTTGTTAAACAATAAACGAACA | 21535 |
| gb:MT093571 | Organism:Severe | TTAGAGAAAACAACAGAGTTGTTATTTCTAGTGATGTTCTTGTTAAACAATAAACGAACA | 21562 |
| gb:MT039887 | Organism:Severe | TTAGAGAAAACAACAGAGTTGTTATTTCTAGTGATGTTCTTGTTAAACAATAAACGAACA | 21559 |
| gb:MT019530 | Organism:Severe | TTAGAGAAAACAACAGAGTTGTTATTTCTAGTGATGTTCTTGTTAAACAATAAACGAACA | 21562 |
| gb:MT039888 | Organism:Severe | TTAGAGAAAACAACAGAGTTGTTATTTCTAGTGATGTTCTTGTTAAACAATAAACGAACA | 21562 |
| gb:LC522972 | Organism:Severe | TTAGAGAAAACAACAGAGTTGTTATTTCTAGTGATGTTCTTGTTAAACAATAAACGAACA | 21559 |
| gb:MT027063 | Organism:Severe | TTAGAGAAAACAACAGAGTTGTTATTTCTAGTGATGTTCTTGTTAAACAATAAACGAACA | 21562 |
| gb:MT027062 | Organism:Severe | TTAGAGAAAACAACAGAGTTGTTATTTCTAGTGATGTTCTTGTTAAACAATAAACGAACA | 21562 |
| gb:MT019529 | Organism:Severe | TTAGAGAAAACAACAGAGTTGTTATTTCTAGTGATGTTCTTGTTAAACAATAAACGAACA | 21562 |
| gb:MN996529 | Organism:Severe | TTAGAGAAAACAACAGAGTTGTTATTTCTAGTGATGTTCTTGTTAAACAATAAACGAACA | 21550 |
| gb:MN996531 | Organism:Severe | TTAGAGAAAACAACAGAGTTGTTATTTCTAGTGATGTTCTTGTTAAACAATAAACGAACA | 21549 |
| gb:MT066176 | Organism:Severe | TTAGAGAAAACAACAGAGTTGTTATTTCTAGTGATGTTCTTGTTAAACAATAAACGAACA | 21562 |
| gb:MT027064 | Organism:Severe | TTAGAGAAAACAACAGAGTTGTTATTTCTAGTGATGTTCTTGTTAAACAATAAACGAACA | 21562 |
| gb:MN994468 | Organism:Severe | TTAGAGAAAACAACAGAGTTGTTATTTCTAGTGATGTTCTTGTTAAACAATAAACGAACA | 21562 |
| gb:MT072688 | Organism:Severe | TTAGAGAAAACAACAGAGTTGTTATTTCTAGTGATGTTCTTGTTAAACAATAAACGAACA | 21547 |
| gb:MN996527 | Organism:Severe | TTAGAGAAAACAACAGAGTTGTTATTTCTAGTGATGTTCTTGTTAAACAATAAACGAACA | 21529 |
| gb:MT093631 | Organism:Severe | TTAGAGAAAACAACAGAGTTGTTATTTCTAGTGATGTTCTTGTTAAACAATAAACGAACA | 21600 |
| gb:MT106053 | Organism:Severe | TTAGAGAAAACAACAGAGTTGTTATTTCTAGTGATGTTCTTGTTAAACAATAAACGAACA | 21562 |
| gb:MT019533 | Organism:Severe | TTAGAGAAAACAACAGAGTTGTTATTTCTAGTGATGTTCTTGTTAAACAATAAACGAACA | 21562 |
| gb:MT019531 | Organism:Severe | TTAGAGAAAACAACAGAGTTGTTATTTCTAGTGATGTTCTTGTTAAACAATAAACGAACA | 21562 |
| gb:MN996528 | Organism:Severe | TTAGAGAAAACAACAGAGTTGTTATTTCTAGTGATGTTCTTGTTAAACAATAAACGAACA | 21562 |
| gb:MN996530 | Organism:Severe | TTAGAGAAAACAACAGAGTTGTTATTTCTAGTGATGTTCTTGTTAAACAATAAACGAACA | 21548 |
| gb:MN908947 | Organism:Severe | TTAGAGAAAACAACAGAGTTGTTATTTCTAGTGATGTTCTTGTTAAACAATAAACGAACA | 21562 |
| gb:MT019532 | Organism:Severe | TTAGAGAAAACAACAGAGTTGTTATTTCTAGTGATGTTCTTGTTAAACAATAAACGAACA | 21562 |

\*\*\*\*\*

|             |                 |                                                              |       |
|-------------|-----------------|--------------------------------------------------------------|-------|
| gb:MT020781 | Organism:Severe | ATGTTTGT TTTTCTTGTTTATTGCCACTAGTCTCTAGTCAGTGTGTTAATCTTACAACC | 21610 |
| gb:MT007544 | Organism:Severe | ATGTTTGT TTTTCTTGTTTATTGCCACTAGTCTCTAGTCAGTGTGTTAATCTTACAACC | 21622 |
| gb:MN994467 | Organism:Severe | ATGTTTGT TTTTCTTGTTTATTGCCACTAGTCTCTAGTCAGTGTGTTAATCTTACAACC | 21622 |
| gb:MT044257 | Organism:Severe | ATGTTTGT TTTTCTTGTTTATTGCCACTAGTCTCTAGTCAGTGTGTTAATCTTACAACC | 21622 |
| gb:MT106054 | Organism:Severe | ATGTTTGT TTTTCTTGTTTATTGCCACTAGTCTCTAGTCAGTGTGTTAATCTTACAACC | 21622 |
| gb:MT049951 | Organism:Severe | ATGTTTGT TTTTCTTGTTTATTGCCACTAGTCTCTAGTCAGTGTGTTAATCTTACAACC | 21622 |
| gb:MN975262 | Organism:Severe | ATGTTTGT TTTTCTTGTTTATTGCCACTAGTCTCTAGTCAGTGTGTTAATCTTACAACC | 21622 |
| gb:MT106052 | Organism:Severe | ATGTTTGT TTTTCTTGTTTATTGCCACTAGTCTCTAGTCAGTGTGTTAATCTTACAACC | 21622 |
| gb:LC522975 | Organism:Severe | ATGTTTGT TTTTCTTGTTTATTGCCACTAGTCTCTAGTCAGTGTGTTAATCTTACAACC | 21619 |
| gb:LC522973 | Organism:Severe | ATGTTTGT TTTTCTTGTTTATTGCCACTAGTCTCTAGTCAGTGTGTTAATCTTACAACC | 21619 |
| gb:LC522974 | Organism:Severe | ATGTTTGT TTTTCTTGTTTATTGCCACTAGTCTCTAGTCAGTGTGTTAATCTTACAACC | 21619 |







|             |                 |                                                               |       |
|-------------|-----------------|---------------------------------------------------------------|-------|
| gb:MT044257 | Organism:Severe | AATGTTACTTGGTTCATGCTATAACATGCTCTCTGGGACCAATGGTACTAAGAGGTTTGAT | 21802 |
| gb:MT106054 | Organism:Severe | AATGTTACTTGGTTCATGCTATAACATGCTCTCTGGGACCAATGGTACTAAGAGGTTTGAT | 21802 |
| gb:MT049951 | Organism:Severe | AATGTTACTTGGTTCATGCTATAACATGCTCTCTGGGACCAATGGTACTAAGAGGTTTGAT | 21802 |
| gb:MN975262 | Organism:Severe | AATGTTACTTGGTTCATGCTATAACATGCTCTCTGGGACCAATGGTACTAAGAGGTTTGAT | 21802 |
| gb:MT106052 | Organism:Severe | AATGTTACTTGGTTCATGCTATAACATGCTCTCTGGGACCAATGGTACTAAGAGGTTTGAT | 21802 |
| gb:LC522975 | Organism:Severe | AATGTTACTTGGTTCATGCTATAACATGCTCTCTGGGACCAATGGTACTAAGAGGTTTGAT | 21799 |
| gb:LC522973 | Organism:Severe | AATGTTACTTGGTTCATGCTATAACATGCTCTCTGGGACCAATGGTACTAAGAGGTTTGAT | 21799 |
| gb:LC522974 | Organism:Severe | AATGTTACTTGGTTCATGCTATAACATGCTCTCTGGGACCAATGGTACTAAGAGGTTTGAT | 21799 |
| gb:MN985325 | Organism:Severe | AATGTTACTTGGTTCATGCTATAACATGCTCTCTGGGACCAATGGTACTAAGAGGTTTGAT | 21802 |
| gb:MT020881 | Organism:Severe | AATGTTACTTGGTTCATGCTATAACATGCTCTCTGGGACCAATGGTACTAAGAGGTTTGAT | 21802 |
| gb:MT020880 | Organism:Severe | AATGTTACTTGGTTCATGCTATAACATGCTCTCTGGGACCAATGGTACTAAGAGGTTTGAT | 21802 |
| gb:MT066175 | Organism:Severe | AATGTTACTTGGTTCATGCTATAACATGCTCTCTGGGACCAATGGTACTAAGAGGTTTGAT | 21802 |
| gb:MN997409 | Organism:Severe | AATGTTACTTGGTTCATGCTATAACATGCTCTCTGGGACCAATGGTACTAAGAGGTTTGAT | 21802 |
| gb:MN938384 | Organism:Severe | AATGTTACTTGGTTCATGCTATAACATGCTCTCTGGGACCAATGGTACTAAGAGGTTTGAT | 21770 |
| gb:MT044258 | Organism:Severe | AATGTTACTTGGTTCATGCTATAACATGCTCTCTGGGACCAATGGTACTAAGAGGTTTGAT | 21778 |
| gb:MT039890 | Organism:Severe | AATGTTACTTGGTTCATGCTATAACATGCTCTCTGGGACCAATGGTACTAAGAGGTTTGAT | 21802 |
| gb:MN988713 | Organism:Severe | AATGTTACTTGGTTCATGCTATAACATGCTCTCTGGGACCAATGGTACTAAGAGGTTTGAT | 21802 |
| gb:LC521925 | Organism:Severe | AATGTTACTTGGTTCATGCTATAACATGCTCTCTGGGACCAATGGTACTAAGAGGTTTGAT | 21775 |
| gb:MT093571 | Organism:Severe | AATGTTACTTGGTTCATGCTATAACATGCTCTCTGGGACCAATGGTACTAAGAGGTTTGAT | 21802 |
| gb:MT039887 | Organism:Severe | AATGTTACTTGGTTCATGCTATAACATGCTCTCTGGGACCAATGGTACTAAGAGGTTTGAT | 21799 |
| gb:MT019530 | Organism:Severe | AATGTTACTTGGTTCATGCTATAACATGCTCTCTGGGACCAATGGTACTAAGAGGTTTGAT | 21802 |
| gb:MT039888 | Organism:Severe | AATGTTACTTGGTTCATGCTATAACATGCTCTCTGGGACCAATGGTACTAAGAGGTTTGAT | 21802 |
| gb:LC522972 | Organism:Severe | AATGTTACTTGGTTCATGCTATAACATGCTCTCTGGGACCAATGGTACTAAGAGGTTTGAT | 21799 |
| gb:MT027063 | Organism:Severe | AATGTTACTTGGTTCATGCTATAACATGCTCTCTGGGACCAATGGTACTAAGAGGTTTGAT | 21802 |
| gb:MT027062 | Organism:Severe | AATGTTACTTGGTTCATGCTATAACATGCTCTCTGGGACCAATGGTACTAAGAGGTTTGAT | 21802 |
| gb:MT019529 | Organism:Severe | AATGTTACTTGGTTCATGCTATAACATGCTCTCTGGGACCAATGGTACTAAGAGGTTTGAT | 21802 |
| gb:MN996529 | Organism:Severe | AATGTTACTTGGTTCATGCTATAACATGCTCTCTGGGACCAATGGTACTAAGAGGTTTGAT | 21790 |
| gb:MN996531 | Organism:Severe | AATGTTACTTGGTTCATGCTATAACATGCTCTCTGGGACCAATGGTACTAAGAGGTTTGAT | 21789 |
| gb:MT066176 | Organism:Severe | AATGTTACTTGGTTCATGCTATAACATGCTCTCTGGGACCAATGGTACTAAGAGGTTTGAT | 21802 |
| gb:MT027064 | Organism:Severe | AATGTTACTTGGTTCATGCTATAACATGCTCTCTGGGACCAATGGTACTAAGAGGTTTGAT | 21802 |
| gb:MN994468 | Organism:Severe | AATGTTACTTGGTTCATGCTATAACATGCTCTCTGGGACCAATGGTACTAAGAGGTTTGAT | 21802 |
| gb:MT072688 | Organism:Severe | AATGTTACTTGGTTCATGCTATAACATGCTCTCTGGGACCAATGGTACTAAGAGGTTTGAT | 21787 |
| gb:MN996527 | Organism:Severe | AATGTTACTTGGTTCATGCTATAACATGCTCTCTGGGACCAATGGTACTAAGAGGTTTGAT | 21769 |
| gb:MT093631 | Organism:Severe | AATGTTACTTGGTTCATGCTATAACATGCTCTCTGGGACCAATGGTACTAAGAGGTTTGAT | 21840 |
| gb:MT106053 | Organism:Severe | AATGTTACTTGGTTCATGCTATAACATGCTCTCTGGGACCAATGGTACTAAGAGGTTTGAT | 21802 |
| gb:MT019533 | Organism:Severe | AATGTTACTTGGTTCATGCTATAACATGCTCTCTGGGACCAATGGTACTAAGAGGTTTGAT | 21802 |
| gb:MT019531 | Organism:Severe | AATGTTACTTGGTTCATGCTATAACATGCTCTCTGGGACCAATGGTACTAAGAGGTTTGAT | 21802 |
| gb:MN996528 | Organism:Severe | AATGTTACTTGGTTCATGCTATAACATGCTCTCTGGGACCAATGGTACTAAGAGGTTTGAT | 21802 |
| gb:MN996530 | Organism:Severe | AATGTTACTTGGTTCATGCTATAACATGCTCTCTGGGACCAATGGTACTAAGAGGTTTGAT | 21788 |
| gb:MN908947 | Organism:Severe | AATGTTACTTGGTTCATGCTATAACATGCTCTCTGGGACCAATGGTACTAAGAGGTTTGAT | 21802 |
| gb:MT019532 | Organism:Severe | AATGTTACTTGGTTCATGCTATAACATGCTCTCTGGGACCAATGGTACTAAGAGGTTTGAT | 21802 |

\*\*\*\*\*

|             |                 |                                                              |       |
|-------------|-----------------|--------------------------------------------------------------|-------|
| gb:MT020781 | Organism:Severe | AACCCTGTCTACCATTAAATGATGGTGTGTTATTTTGCTTCCACTGAGAAGTCTAACATA | 21850 |
| gb:MT007544 | Organism:Severe | AACCCTGTCTACCATTAAATGATGGTGTGTTATTTTGCTTCCACTGAGAAGTCTAACATA | 21862 |
| gb:MN994467 | Organism:Severe | AACCCTGTCTACCATTAAATGATGGTGTGTTATTTTGCTTCCACTGAGAAGTCTAACATA | 21862 |
| gb:MT044257 | Organism:Severe | AACCCTGTCTACCATTAAATGATGGTGTGTTATTTTGCTTCCACTGAGAAGTCTAACATA | 21862 |
| gb:MT106054 | Organism:Severe | AACCCTGTCTACCATTAAATGATGGTGTGTTATTTTGCTTCCACTGAGAAGTCTAACATA | 21862 |
| gb:MT049951 | Organism:Severe | AACCCTGTCTACCATTAAATGATGGTGTGTTATTTTGCTTCCACTGAGAAGTCTAACATA | 21862 |
| gb:MN975262 | Organism:Severe | AACCCTGTCTACCATTAAATGATGGTGTGTTATTTTGCTTCCACTGAGAAGTCTAACATA | 21862 |
| gb:MT106052 | Organism:Severe | AACCCTGTCTACCATTAAATGATGGTGTGTTATTTTGCTTCCACTGAGAAGTCTAACATA | 21862 |
| gb:LC522975 | Organism:Severe | AACCCTGTCTACCATTAAATGATGGTGTGTTATTTTGCTTCCACTGAGAAGTCTAACATA | 21859 |
| gb:LC522973 | Organism:Severe | AACCCTGTCTACCATTAAATGATGGTGTGTTATTTTGCTTCCACTGAGAAGTCTAACATA | 21859 |
| gb:LC522974 | Organism:Severe | AACCCTGTCTACCATTAAATGATGGTGTGTTATTTTGCTTCCACTGAGAAGTCTAACATA | 21859 |
| gb:MN985325 | Organism:Severe | AACCCTGTCTACCATTAAATGATGGTGTGTTATTTTGCTTCCACTGAGAAGTCTAACATA | 21862 |
| gb:MT020881 | Organism:Severe | AACCCTGTCTACCATTAAATGATGGTGTGTTATTTTGCTTCCACTGAGAAGTCTAACATA | 21862 |
| gb:MT020880 | Organism:Severe | AACCCTGTCTACCATTAAATGATGGTGTGTTATTTTGCTTCCACTGAGAAGTCTAACATA | 21862 |
| gb:MT066175 | Organism:Severe | AACCCTGTCTACCATTAAATGATGGTGTGTTATTTTGCTTCCACTGAGAAGTCTAACATA | 21862 |
| gb:MN997409 | Organism:Severe | AACCCTGTCTACCATTAAATGATGGTGTGTTATTTTGCTTCCACTGAGAAGTCTAACATA | 21862 |
| gb:MN938384 | Organism:Severe | AACCCTGTCTACCATTAAATGATGGTGTGTTATTTTGCTTCCACTGAGAAGTCTAACATA | 21830 |
| gb:MT044258 | Organism:Severe | AACCCTGTCTACCATTAAATGATGGTGTGTTATTTTGCTTCCACTGAGAAGTCTAACATA | 21838 |
| gb:MT039890 | Organism:Severe | AACCCTGTCTACCATTAAATGATGGTGTGTTATTTTGCTTCCACTGAGAAGTCTAACATA | 21862 |
| gb:MN988713 | Organism:Severe | AACCCTGTCTACCATTAAATGATGGTGTGTTATTTTGCTTCCACTGAGAAGTCTAACATA | 21862 |
| gb:LC521925 | Organism:Severe | AACCCTGTCTACCATTAAATGATGGTGTGTTATTTTGCTTCCACTGAGAAGTCTAACATA | 21835 |
| gb:MT093571 | Organism:Severe | AACCCTGTCTACCATTAAATGATGGTGTGTTATTTTGCTTCCACTGAGAAGTCTAACATA | 21862 |

|             |                 |                                                            |       |
|-------------|-----------------|------------------------------------------------------------|-------|
| gb:MT039887 | Organism:Severe | AACCCTGTCTACCATTTAATGATGGTGTGTTATTTTCTCCACTGAGAAGTCTAACATA | 21859 |
| gb:MT019530 | Organism:Severe | AACCCTGTCTACCATTTAATGATGGTGTGTTATTTTCTCCACTGAGAAGTCTAACATA | 21862 |
| gb:MT039888 | Organism:Severe | AACCCTGTCTACCATTTAATGATGGTGTGTTATTTTCTCCACTGAGAAGTCTAACATA | 21862 |
| gb:LC522972 | Organism:Severe | AACCCTGTCTACCATTTAATGATGGTGTGTTATTTTCTCCACTGAGAAGTCTAACATA | 21859 |
| gb:MT027063 | Organism:Severe | AACCCTGTCTACCATTTAATGATGGTGTGTTATTTTCTCCACTGAGAAGTCTAACATA | 21862 |
| gb:MT027062 | Organism:Severe | AACCCTGTCTACCATTTAATGATGGTGTGTTATTTTCTCCACTGAGAAGTCTAACATA | 21862 |
| gb:MT019529 | Organism:Severe | AACCCTGTCTACCATTTAATGATGGTGTGTTATTTTCTCCACTGAGAAGTCTAACATA | 21862 |
| gb:MN996529 | Organism:Severe | AACCCTGTCTACCATTTAATGATGGTGTGTTATTTTCTCCACTGAGAAGTCTAACATA | 21850 |
| gb:MN996531 | Organism:Severe | AACCCTGTCTACCATTTAATGATGGTGTGTTATTTTCTCCACTGAGAAGTCTAACATA | 21849 |
| gb:MT066176 | Organism:Severe | AACCCTGTCTACCATTTAATGATGGTGTGTTATTTTCTCCACTGAGAAGTCTAACATA | 21862 |
| gb:MT027064 | Organism:Severe | AACCCTGTCTACCATTTAATGATGGTGTGTTATTTTCTCCACTGAGAAGTCTAACATA | 21862 |
| gb:MN994468 | Organism:Severe | AACCCTGTCTACCATTTAATGATGGTGTGTTATTTTCTCCACTGAGAAGTCTAACATA | 21862 |
| gb:MT072688 | Organism:Severe | AACCCTGTCTACCATTTAATGATGGTGTGTTATTTTCTCCACTGAGAAGTCTAACATA | 21847 |
| gb:MN996527 | Organism:Severe | AACCCTGTCTACCATTTAATGATGGTGTGTTATTTTCTCCACTGAGAAGTCTAACATA | 21829 |
| gb:MT093631 | Organism:Severe | AACCCTGTCTACCATTTAATGATGGTGTGTTATTTTCTCCACTGAGAAGTCTAACATA | 21900 |
| gb:MT106053 | Organism:Severe | AACCCTGTCTACCATTTAATGATGGTGTGTTATTTTCTCCACTGAGAAGTCTAACATA | 21862 |
| gb:MT019533 | Organism:Severe | AACCCTGTCTACCATTTAATGATGGTGTGTTATTTTCTCCACTGAGAAGTCTAACATA | 21862 |
| gb:MT019531 | Organism:Severe | AACCCTGTCTACCATTTAATGATGGTGTGTTATTTTCTCCACTGAGAAGTCTAACATA | 21862 |
| gb:MN996528 | Organism:Severe | AACCCTGTCTACCATTTAATGATGGTGTGTTATTTTCTCCACTGAGAAGTCTAACATA | 21862 |
| gb:MN996530 | Organism:Severe | AACCCTGTCTACCATTTAATGATGGTGTGTTATTTTCTCCACTGAGAAGTCTAACATA | 21848 |
| gb:MN908947 | Organism:Severe | AACCCTGTCTACCATTTAATGATGGTGTGTTATTTTCTCCACTGAGAAGTCTAACATA | 21862 |
| gb:MT019532 | Organism:Severe | AACCCTGTCTACCATTTAATGATGGTGTGTTATTTTCTCCACTGAGAAGTCTAACATA | 21862 |

\*\*\*\*\*

|             |                 |                                                              |       |
|-------------|-----------------|--------------------------------------------------------------|-------|
| gb:MT020781 | Organism:Severe | ATAAGAGGCTGGATTTTTGGTACTACTTTAGATTGGAAGACCCAGTCCCTACTTATTGTT | 21910 |
| gb:MT007544 | Organism:Severe | ATAAGAGGCTGGATTTTTGGTACTACTTTAGATTGGAAGACCCAGTCCCTACTTATTGTT | 21922 |
| gb:MN994467 | Organism:Severe | ATAAGAGGCTGGATTTTTGGTACTACTTTAGATTGGAAGACCCAGTCCCTACTTATTGTT | 21922 |
| gb:MT044257 | Organism:Severe | ATAAGAGGCTGGATTTTTGGTACTACTTTAGATTGGAAGACCCAGTCCCTACTTATTGTT | 21922 |
| gb:MT106054 | Organism:Severe | ATAAGAGGCTGGATTTTTGGTACTACTTTAGATTGGAAGACCCAGTCCCTACTTATTGTT | 21922 |
| gb:MT049951 | Organism:Severe | ATAAGAGGCTGGATTTTTGGTACTACTTTAGATTGGAAGACCCAGTCCCTACTTATTGTT | 21922 |
| gb:MN975262 | Organism:Severe | ATAAGAGGCTGGATTTTTGGTACTACTTTAGATTGGAAGACCCAGTCCCTACTTATTGTT | 21922 |
| gb:MT106052 | Organism:Severe | ATAAGAGGCTGGATTTTTGGTACTACTTTAGATTGGAAGACCCAGTCCCTACTTATTGTT | 21922 |
| gb:MT106051 | Organism:Severe | ATAAGAGGCTGGATTTTTGGTACTACTTTAGATTGGAAGACCCAGTCCCTACTTATTGTT | 21922 |
| gb:LC522975 | Organism:Severe | ATAAGAGGCTGGATTTTTGGTACTACTTTAGATTGGAAGACCCAGTCCCTACTTATTGTT | 21919 |
| gb:LC522973 | Organism:Severe | ATAAGAGGCTGGATTTTTGGTACTACTTTAGATTGGAAGACCCAGTCCCTACTTATTGTT | 21919 |
| gb:LC522974 | Organism:Severe | ATAAGAGGCTGGATTTTTGGTACTACTTTAGATTGGAAGACCCAGTCCCTACTTATTGTT | 21919 |
| gb:MN985325 | Organism:Severe | ATAAGAGGCTGGATTTTTGGTACTACTTTAGATTGGAAGACCCAGTCCCTACTTATTGTT | 21922 |
| gb:MT020881 | Organism:Severe | ATAAGAGGCTGGATTTTTGGTACTACTTTAGATTGGAAGACCCAGTCCCTACTTATTGTT | 21922 |
| gb:MT020880 | Organism:Severe | ATAAGAGGCTGGATTTTTGGTACTACTTTAGATTGGAAGACCCAGTCCCTACTTATTGTT | 21922 |
| gb:MT066175 | Organism:Severe | ATAAGAGGCTGGATTTTTGGTACTACTTTAGATTGGAAGACCCAGTCCCTACTTATTGTT | 21922 |
| gb:MN997409 | Organism:Severe | ATAAGAGGCTGGATTTTTGGTACTACTTTAGATTGGAAGACCCAGTCCCTACTTATTGTT | 21922 |
| gb:MN938384 | Organism:Severe | ATAAGAGGCTGGATTTTTGGTACTACTTTAGATTGGAAGACCCAGTCCCTACTTATTGTT | 21890 |
| gb:MT044258 | Organism:Severe | ATAAGAGGCTGGATTTTTGGTACTACTTTAGATTGGAAGACCCAGTCCCTACTTATTGTT | 21898 |
| gb:MT039890 | Organism:Severe | ATAAGAGGCTGGATTTTTGGTACTACTTTAGATTGGAAGACCCAGTCCCTACTTATTGTT | 21922 |
| gb:MN988713 | Organism:Severe | ATAAGAGGCTGGATTTTTGGTACTACTTTAGATTGGAAGACCCAGTCCCTACTTATTGTT | 21922 |
| gb:LC521925 | Organism:Severe | ATAAGAGGCTGGATTTTTGGTACTACTTTAGATTGGAAGACCCAGTCCCTACTTATTGTT | 21895 |
| gb:MT093571 | Organism:Severe | ATAAGAGGCTGGATTTTTGGTACTACTTTAGATTGGAAGACCCAGTCCCTACTTATTGTT | 21922 |
| gb:MT039887 | Organism:Severe | ATAAGAGGCTGGATTTTTGGTACTACTTTAGATTGGAAGACCCAGTCCCTACTTATTGTT | 21919 |
| gb:MT019530 | Organism:Severe | ATAAGAGGCTGGATTTTTGGTACTACTTTAGATTGGAAGACCCAGTCCCTACTTATTGTT | 21922 |
| gb:MT039888 | Organism:Severe | ATAAGAGGCTGGATTTTTGGTACTACTTTAGATTGGAAGACCCAGTCCCTACTTATTGTT | 21922 |
| gb:LC522972 | Organism:Severe | ATAAGAGGCTGGATTTTTGGTACTACTTTAGATTGGAAGACCCAGTCCCTACTTATTGTT | 21919 |
| gb:MT027063 | Organism:Severe | ATAAGAGGCTGGATTTTTGGTACTACTTTAGATTGGAAGACCCAGTCCCTACTTATTGTT | 21922 |
| gb:MT027062 | Organism:Severe | ATAAGAGGCTGGATTTTTGGTACTACTTTAGATTGGAAGACCCAGTCCCTACTTATTGTT | 21922 |
| gb:MT019529 | Organism:Severe | ATAAGAGGCTGGATTTTTGGTACTACTTTAGATTGGAAGACCCAGTCCCTACTTATTGTT | 21922 |
| gb:MN996529 | Organism:Severe | ATAAGAGGCTGGATTTTTGGTACTACTTTAGATTGGAAGACCCAGTCCCTACTTATTGTT | 21910 |
| gb:MN996531 | Organism:Severe | ATAAGAGGCTGGATTTTTGGTACTACTTTAGATTGGAAGACCCAGTCCCTACTTATTGTT | 21909 |
| gb:MT066176 | Organism:Severe | ATAAGAGGCTGGATTTTTGGTACTACTTTAGATTGGAAGACCCAGTCCCTACTTATTGTT | 21922 |
| gb:MT027064 | Organism:Severe | ATAAGAGGCTGGATTTTTGGTACTACTTTAGATTGGAAGACCCAGTCCCTACTTATTGTT | 21922 |
| gb:MN994468 | Organism:Severe | ATAAGAGGCTGGATTTTTGGTACTACTTTAGATTGGAAGACCCAGTCCCTACTTATTGTT | 21922 |
| gb:MT072688 | Organism:Severe | ATAAGAGGCTGGATTTTTGGTACTACTTTAGATTGGAAGACCCAGTCCCTACTTATTGTT | 21907 |
| gb:MN996527 | Organism:Severe | ATAAGAGGCTGGATTTTTGGTACTACTTTAGATTGGAAGACCCAGTCCCTACTTATTGTT | 21889 |
| gb:MT093631 | Organism:Severe | ATAAGAGGCTGGATTTTTGGTACTACTTTAGATTGGAAGACCCAGTCCCTACTTATTGTT | 21960 |
| gb:MT106053 | Organism:Severe | ATAAGAGGCTGGATTTTTGGTACTACTTTAGATTGGAAGACCCAGTCCCTACTTATTGTT | 21922 |
| gb:MT019533 | Organism:Severe | ATAAGAGGCTGGATTTTTGGTACTACTTTAGATTGGAAGACCCAGTCCCTACTTATTGTT | 21922 |
| gb:MT019531 | Organism:Severe | ATAAGAGGCTGGATTTTTGGTACTACTTTAGATTGGAAGACCCAGTCCCTACTTATTGTT | 21922 |
| gb:MN996528 | Organism:Severe | ATAAGAGGCTGGATTTTTGGTACTACTTTAGATTGGAAGACCCAGTCCCTACTTATTGTT | 21922 |

|             |                  |                                                                       |       |
|-------------|------------------|-----------------------------------------------------------------------|-------|
| gb:MN996530 | Organism: Severe | ATAAGAGCTGGATTTTTGGTACTACTTTAGATTCGAAGACCCAGTCCCTACTTATTGTT           | 21908 |
| gb:MN908947 | Organism: Severe | ATAAGAGCTGGATTTTTGGTACTACTTTAGATTCGAAGACCCAGTCCCTACTTATTGTT           | 21922 |
| gb:MT019532 | Organism: Severe | ATAAGAGCTGGATTTTTGGTACTACTTTAGATTCGAAGACCCAGTCCCTACTTATTGTT<br>*****  | 21922 |
| gb:MT020781 | Organism: Severe | AATAACGCTACTAATGTTGTTATTAAGTCTGTGAATTTCAATTTTGTAAATGATCCATTT          | 21970 |
| gb:MT007544 | Organism: Severe | AATAACGCTACTAATGTTGTTATTAAGTCTGTGAATTTCAATTTTGTAAATGATCCATTT          | 21982 |
| gb:MN994467 | Organism: Severe | AATAACGCTACTAATGTTGTTATTAAGTCTGTGAATTTCAATTTTGTAAATGATCCATTT          | 21982 |
| gb:MT044257 | Organism: Severe | AATAACGCTACTAATGTTGTTATTAAGTCTGTGAATTTCAATTTTGTAAATGATCCATTT          | 21982 |
| gb:MT106054 | Organism: Severe | AATAACGCTACTAATGTTGTTATTAAGTCTGTGAATTTCAATTTTGTAAATGATCCATTT          | 21982 |
| gb:MT049951 | Organism: Severe | AATAACGCTACTAATGTTGTTATTAAGTCTGTGAATTTCAATTTTGTAAATGATCCATTT          | 21982 |
| gb:MN975262 | Organism: Severe | AATAACGCTACTAATGTTGTTATTAAGTCTGTGAATTTCAATTTTGTAAATGATCCATTT          | 21982 |
| gb:MT106052 | Organism: Severe | AATAACGCTACTAATGTTGTTATTAAGTCTGTGAATTTCAATTTTGTAAATGATCCATTT          | 21982 |
| gb:LC522975 | Organism: Severe | AATAACGCTACTAATGTTGTTATTAAGTCTGTGAATTTCAATTTTGTAAATGATCCATTT          | 21979 |
| gb:LC522973 | Organism: Severe | AATAACGCTACTAATGTTGTTATTAAGTCTGTGAATTTCAATTTTGTAAATGATCCATTT          | 21979 |
| gb:LC522974 | Organism: Severe | AATAACGCTACTAATGTTGTTATTAAGTCTGTGAATTTCAATTTTGTAAATGATCCATTT          | 21979 |
| gb:MN985325 | Organism: Severe | AATAACGCTACTAATGTTGTTATTAAGTCTGTGAATTTCAATTTTGTAAATGATCCATTT          | 21982 |
| gb:MT020881 | Organism: Severe | AATAACGCTACTAATGTTGTTATTAAGTCTGTGAATTTCAATTTTGTAAATGATCCATTT          | 21982 |
| gb:MT020880 | Organism: Severe | AATAACGCTACTAATGTTGTTATTAAGTCTGTGAATTTCAATTTTGTAAATGATCCATTT          | 21982 |
| gb:MT066175 | Organism: Severe | AATAACGCTACTAATGTTGTTATTAAGTCTGTGAATTTCAATTTTGTAAATGATCCATTT          | 21982 |
| gb:MN997409 | Organism: Severe | AATAACGCTACTAATGTTGTTATTAAGTCTGTGAATTTCAATTTTGTAAATGATCCATTT          | 21982 |
| gb:MN938384 | Organism: Severe | AATAACGCTACTAATGTTGTTATTAAGTCTGTGAATTTCAATTTTGTAAATGATCCATTT          | 21950 |
| gb:MT044258 | Organism: Severe | AATAACGCTACTAATGTTGTTATTAAGTCTGTGAATTTCAATTTTGTAAATGATCCATTT          | 21958 |
| gb:MT039890 | Organism: Severe | AATAACGCTACTAATGTTGTTATTAAGTCTGTGAATTTCAATTTTGTAAATGATCCATTT          | 21982 |
| gb:MN988713 | Organism: Severe | AATAACGCTACTAATGTTGTTATTAAGTCTGTGAATTTCAATTTTGTAAATGATCCATTT          | 21982 |
| gb:LC521925 | Organism: Severe | AATAACGCTACTAATGTTGTTATTAAGTCTGTGAATTTCAATTTTGTAAATGATCCATTT          | 21955 |
| gb:MT093571 | Organism: Severe | AATAACGCTACTAATGTTGTTATTAAGTCTGTGAATTTCAATTTTGTAAATGATCCATTT          | 21982 |
| gb:MT039887 | Organism: Severe | AATAACGCTACTAATGTTGTTATTAAGTCTGTGAATTTCAATTTTGTAAATGATCCATTT          | 21979 |
| gb:MT019530 | Organism: Severe | AATAACGCTACTAATGTTGTTATTAAGTCTGTGAATTTCAATTTTGTAAATGATCCATTT          | 21982 |
| gb:MT039888 | Organism: Severe | AATAACGCTACTAATGTTGTTATTAAGTCTGTGAATTTCAATTTTGTAAATGATCCATTT          | 21982 |
| gb:LC522972 | Organism: Severe | AATAACGCTACTAATGTTGTTATTAAGTCTGTGAATTTCAATTTTGTAAATGATCCATTT          | 21979 |
| gb:MT027063 | Organism: Severe | AATAACGCTACTAATGTTGTTATTAAGTCTGTGAATTTCAATTTTGTAAATGATCCATTT          | 21982 |
| gb:MT027062 | Organism: Severe | AATAACGCTACTAATGTTGTTATTAAGTCTGTGAATTTCAATTTTGTAAATGATCCATTT          | 21982 |
| gb:MT019529 | Organism: Severe | AATAACGCTACTAATGTTGTTATTAAGTCTGTGAATTTCAATTTTGTAAATGATCCATTT          | 21982 |
| gb:MN996529 | Organism: Severe | AATAACGCTACTAATGTTGTTATTAAGTCTGTGAATTTCAATTTTGTAAATGATCCATTT          | 21970 |
| gb:MN996531 | Organism: Severe | AATAACGCTACTAATGTTGTTATTAAGTCTGTGAATTTCAATTTTGTAAATGATCCATTT          | 21969 |
| gb:MT066176 | Organism: Severe | AATAACGCTACTAATGTTGTTATTAAGTCTGTGAATTTCAATTTTGTAAATGATCCATTT          | 21982 |
| gb:MT027064 | Organism: Severe | AATAACGCTACTAATGTTGTTATTAAGTCTGTGAATTTCAATTTTGTAAATGATCCATTT          | 21982 |
| gb:MN994468 | Organism: Severe | AATAACGCTACTAATGTTGTTATTAAGTCTGTGAATTTCAATTTTGTAAATGATCCATTT          | 21982 |
| gb:MT072688 | Organism: Severe | AATAACGCTACTAATGTTGTTATTAAGTCTGTGAATTTCAATTTTGTAAATGATCCATTT          | 21967 |
| gb:MN996527 | Organism: Severe | AATAACGCTACTAATGTTGTTATTAAGTCTGTGAATTTCAATTTTGTAAATGATCCATTT          | 21949 |
| gb:MT093631 | Organism: Severe | AATAACGCTACTAATGTTGTTATTAAGTCTGTGAATTTCAATTTTGTAAATGATCCATTT          | 22020 |
| gb:MT106053 | Organism: Severe | AATAACGCTACTAATGTTGTTATTAAGTCTGTGAATTTCAATTTTGTAAATGATCCATTT          | 21982 |
| gb:MT019533 | Organism: Severe | AATAACGCTACTAATGTTGTTATTAAGTCTGTGAATTTCAATTTTGTAAATGATCCATTT          | 21982 |
| gb:MT019531 | Organism: Severe | AATAACGCTACTAATGTTGTTATTAAGTCTGTGAATTTCAATTTTGTAAATGATCCATTT          | 21982 |
| gb:MN996528 | Organism: Severe | AATAACGCTACTAATGTTGTTATTAAGTCTGTGAATTTCAATTTTGTAAATGATCCATTT          | 21982 |
| gb:MN996530 | Organism: Severe | AATAACGCTACTAATGTTGTTATTAAGTCTGTGAATTTCAATTTTGTAAATGATCCATTT          | 21968 |
| gb:MN908947 | Organism: Severe | AATAACGCTACTAATGTTGTTATTAAGTCTGTGAATTTCAATTTTGTAAATGATCCATTT          | 21982 |
| gb:MT019532 | Organism: Severe | AATAACGCTACTAATGTTGTTATTAAGTCTGTGAATTTCAATTTTGTAAATGATCCATTT<br>***** | 21982 |

|             |                  |                                                              |       |
|-------------|------------------|--------------------------------------------------------------|-------|
| gb:MT020781 | Organism: Severe | TTGGGTGTTTATTACCACAAAAACAACAAAAGTTGGATGGAAAGTGAGTTCAGAGTTTAT | 22030 |
| gb:MT007544 | Organism: Severe | TTGGGTGTTTATTACCACAAAAACAACAAAAGTTGGATGGAAAGTGAGTTCAGAGTTTAT | 22042 |
| gb:MN994467 | Organism: Severe | TTGGGTGTTTATTACCACAAAAACAACAAAAGTTGGATGGAAAGTGAGTTCAGAGTTTAT | 22042 |
| gb:MT044257 | Organism: Severe | TTGGGTGTTTATTACCACAAAAACAACAAAAGTTGGATGGAAAGTGAGTTCAGAGTTTAT | 22042 |
| gb:MT106054 | Organism: Severe | TTGGGTGTTTATTACCACAAAAACAACAAAAGTTGGATGGAAAGTGAGTTCAGAGTTTAT | 22042 |
| gb:MT049951 | Organism: Severe | TTGGGTGTTTATTACCACAAAAACAACAAAAGTTGGATGGAAAGTGAGTTCAGAGTTTAT | 22042 |
| gb:MN975262 | Organism: Severe | TTGGGTGTTTATTACCACAAAAACAACAAAAGTTGGATGGAAAGTGAGTTCAGAGTTTAT | 22042 |
| gb:MT106052 | Organism: Severe | TTGGGTGTTTATTACCACAAAAACAACAAAAGTTGGATGGAAAGTGAGTTCAGAGTTTAT | 22042 |
| gb:LC522975 | Organism: Severe | TTGGGTGTTTATTACCACAAAAACAACAAAAGTTGGATGGAAAGTGAGTTCAGAGTTTAT | 22039 |
| gb:LC522973 | Organism: Severe | TTGGGTGTTTATTACCACAAAAACAACAAAAGTTGGATGGAAAGTGAGTTCAGAGTTTAT | 22039 |
| gb:LC522974 | Organism: Severe | TTGGGTGTTTATTACCACAAAAACAACAAAAGTTGGATGGAAAGTGAGTTCAGAGTTTAT | 22039 |
| gb:MN985325 | Organism: Severe | TTGGGTGTTTATTACCACAAAAACAACAAAAGTTGGATGGAAAGTGAGTTCAGAGTTTAT | 22042 |
| gb:MT020881 | Organism: Severe | TTGGGTGTTTATTACCACAAAAACAACAAAAGTTGGATGGAAAGTGAGTTCAGAGTTTAT | 22042 |
| gb:MT020880 | Organism: Severe | TTGGGTGTTTATTACCACAAAAACAACAAAAGTTGGATGGAAAGTGAGTTCAGAGTTTAT | 22042 |



|             |                 |                                                              |       |
|-------------|-----------------|--------------------------------------------------------------|-------|
| gb:MN994468 | Organism:Severe | TCTAGTGCGAATAATTGCACTTTTGAATATGTCTCTCAGCCTTTTCTTATGGACCTTGAA | 22102 |
| gb:MT072688 | Organism:Severe | TCTAGTGCGAATAATTGCACTTTTGAATATGTCTCTCAGCCTTTTCTTATGGACCTTGAA | 22087 |
| gb:MN996527 | Organism:Severe | TCTAGTGCGAATAATTGCACTTTTGAATATGTCTCTCAGCCTTTTCTTATGGACCTTGAA | 22069 |
| gb:MT093631 | Organism:Severe | TCTAGTGCGAATAATTGCACTTTTGAATATGTCTCTCAGCCTTTTCTTATGGACCTTGAA | 22140 |
| gb:MT106053 | Organism:Severe | TCTAGTGCGAATAATTGCACTTTTGAATATGTCTCTCAGCCTTTTCTTATGGACCTTGAA | 22102 |
| gb:MT019533 | Organism:Severe | TCTAGTGCGAATAATTGCACTTTTGAATATGTCTCTCAGCCTTTTCTTATGGACCTTGAA | 22102 |
| gb:MT019531 | Organism:Severe | TCTAGTGCGAATAATTGCACTTTTGAATATGTCTCTCAGCCTTTTCTTATGGACCTTGAA | 22102 |
| gb:MN996528 | Organism:Severe | TCTAGTGCGAATAATTGCACTTTTGAATATGTCTCTCAGCCTTTTCTTATGGACCTTGAA | 22102 |
| gb:MN996530 | Organism:Severe | TCTAGTGCGAATAATTGCACTTTTGAATATGTCTCTCAGCCTTTTCTTATGGACCTTGAA | 22088 |
| gb:MN908947 | Organism:Severe | TCTAGTGCGAATAATTGCACTTTTGAATATGTCTCTCAGCCTTTTCTTATGGACCTTGAA | 22102 |
| gb:MT019532 | Organism:Severe | TCTAGTGCGAATAATTGCACTTTTGAATATGTCTCTCAGCCTTTTCTTATGGACCTTGAA | 22102 |

\*\*\*\*\*

|             |                 |                                                             |       |
|-------------|-----------------|-------------------------------------------------------------|-------|
| gb:MT020781 | Organism:Severe | GGAAAACAGGGTAATTTCAAAAATCTTAGGGAATTTGTGTTAAGAATATTGATGGTTAT | 22150 |
| gb:MT007544 | Organism:Severe | GGAAAACAGGGTAATTTCAAAAATCTTAGGGAATTTGTGTTAAGAATATTGATGGTTAT | 22162 |
| gb:MN994467 | Organism:Severe | GGAAAACAGGGTAATTTCAAAAATCTTAGGGAATTTGTGTTAAGAATATTGATGGTTAT | 22162 |
| gb:MT044257 | Organism:Severe | GGAAAACAGGGTAATTTCAAAAATCTTAGGGAATTTGTGTTAAGAATATTGATGGTTAT | 22162 |
| gb:MT106054 | Organism:Severe | GGAAAACAGGGTAATTTCAAAAATCTTAGGGAATTTGTGTTAAGAATATTGATGGTTAT | 22162 |
| gb:MT049951 | Organism:Severe | GGAAAACAGGGTAATTTCAAAAATCTTAGGGAATTTGTGTTAAGAATATTGATGGTTAT | 22162 |
| gb:MN975262 | Organism:Severe | GGAAAACAGGGTAATTTCAAAAATCTTAGGGAATTTGTGTTAAGAATATTGATGGTTAT | 22162 |
| gb:MT106052 | Organism:Severe | GGAAAACAGGGTAATTTCAAAAATCTTAGGGAATTTGTGTTAAGAATATTGATGGTTAT | 22162 |
| gb:LC522975 | Organism:Severe | GGAAAACAGGGTAATTTCAAAAATCTTAGGGAATTTGTGTTAAGAATATTGATGGTTAT | 22159 |
| gb:LC522973 | Organism:Severe | GGAAAACAGGGTAATTTCAAAAATCTTAGGGAATTTGTGTTAAGAATATTGATGGTTAT | 22159 |
| gb:LC522974 | Organism:Severe | GGAAAACAGGGTAATTTCAAAAATCTTAGGGAATTTGTGTTAAGAATATTGATGGTTAT | 22159 |
| gb:MN985325 | Organism:Severe | GGAAAACAGGGTAATTTCAAAAATCTTAGGGAATTTGTGTTAAGAATATTGATGGTTAT | 22162 |
| gb:MT020881 | Organism:Severe | GGAAAACAGGGTAATTTCAAAAATCTTAGGGAATTTGTGTTAAGAATATTGATGGTTAT | 22162 |
| gb:MT020880 | Organism:Severe | GGAAAACAGGGTAATTTCAAAAATCTTAGGGAATTTGTGTTAAGAATATTGATGGTTAT | 22162 |
| gb:MT066175 | Organism:Severe | GGAAAACAGGGTAATTTCAAAAATCTTAGGGAATTTGTGTTAAGAATATTGATGGTTAT | 22162 |
| gb:MN997409 | Organism:Severe | GGAAAACAGGGTAATTTCAAAAATCTTAGGGAATTTGTGTTAAGAATATTGATGGTTAT | 22162 |
| gb:MN938384 | Organism:Severe | GGAAAACAGGGTAATTTCAAAAATCTTAGGGAATTTGTGTTAAGAATATTGATGGTTAT | 22130 |
| gb:MT044258 | Organism:Severe | GGAAAACAGGGTAATTTCAAAAATCTTAGGGAATTTGTGTTAAGAATATTGATGGTTAT | 22138 |
| gb:MT039890 | Organism:Severe | GGAAAACAGGGTAATTTCAAAAATCTTAGGGAATTTGTGTTAAGAATATTGATGGTTAT | 22162 |
| gb:MN988713 | Organism:Severe | GGAAAACAGGGTAATTTCAAAAATCTTAGGGAATTTGTGTTAAGAATATTGATGGTTAT | 22162 |
| gb:LC521925 | Organism:Severe | GGAAAACAGGGTAATTTCAAAAATCTTAGGGAATTTGTGTTAAGAATATTGATGGTTAT | 22135 |
| gb:MT093571 | Organism:Severe | GGAAAACAGGGTAATTTCAAAAATCTTAGGGAATTTGTGTTAAGAATATTGATGGTTAT | 22162 |
| gb:MT039887 | Organism:Severe | GGAAAACAGGGTAATTTCAAAAATCTTAGGGAATTTGTGTTAAGAATATTGATGGTTAT | 22159 |
| gb:MT019530 | Organism:Severe | GGAAAACAGGGTAATTTCAAAAATCTTAGGGAATTTGTGTTAAGAATATTGATGGTTAT | 22162 |
| gb:MT039888 | Organism:Severe | GGAAAACAGGGTAATTTCAAAAATCTTAGGGAATTTGTGTTAAGAATATTGATGGTTAT | 22162 |
| gb:LC522972 | Organism:Severe | GGAAAACAGGGTAATTTCAAAAATCTTAGGGAATTTGTGTTAAGAATATTGATGGTTAT | 22159 |
| gb:MT027063 | Organism:Severe | GGAAAACAGGGTAATTTCAAAAATCTTAGGGAATTTGTGTTAAGAATATTGATGGTTAT | 22162 |
| gb:MT027062 | Organism:Severe | GGAAAACAGGGTAATTTCAAAAATCTTAGGGAATTTGTGTTAAGAATATTGATGGTTAT | 22162 |
| gb:MT019529 | Organism:Severe | GGAAAACAGGGTAATTTCAAAAATCTTAGGGAATTTGTGTTAAGAATATTGATGGTTAT | 22162 |
| gb:MN996529 | Organism:Severe | GGAAAACAGGGTAATTTCAAAAATCTTAGGGAATTTGTGTTAAGAATATTGATGGTTAT | 22150 |
| gb:MN996531 | Organism:Severe | GGAAAACAGGGTAATTTCAAAAATCTTAGGGAATTTGTGTTAAGAATATTGATGGTTAT | 22149 |
| gb:MT066176 | Organism:Severe | GGAAAACAGGGTAATTTCAAAAATCTTAGGGAATTTGTGTTAAGAATATTGATGGTTAT | 22162 |
| gb:MT027064 | Organism:Severe | GGAAAACAGGGTAATTTCAAAAATCTTAGGGAATTTGTGTTAAGAATATTGATGGTTAT | 22162 |
| gb:MN994468 | Organism:Severe | GGAAAACAGGGTAATTTCAAAAATCTTAGGGAATTTGTGTTAAGAATATTGATGGTTAT | 22162 |
| gb:MT072688 | Organism:Severe | GGAAAACAGGGTAATTTCAAAAATCTTAGGGAATTTGTGTTAAGAATATTGATGGTTAT | 22147 |
| gb:MN996527 | Organism:Severe | GGAAAACAGGGTAATTTCAAAAATCTTAGGGAATTTGTGTTAAGAATATTGATGGTTAT | 22129 |
| gb:MT093631 | Organism:Severe | GGAAAACAGGGTAATTTCAAAAATCTTAGGGAATTTGTGTTAAGAATATTGATGGTTAT | 22200 |
| gb:MT106053 | Organism:Severe | GGAAAACAGGGTAATTTCAAAAATCTTAGGGAATTTGTGTTAAGAATATTGATGGTTAT | 22162 |
| gb:MT019533 | Organism:Severe | GGAAAACAGGGTAATTTCAAAAATCTTAGGGAATTTGTGTTAAGAATATTGATGGTTAT | 22162 |
| gb:MT019531 | Organism:Severe | GGAAAACAGGGTAATTTCAAAAATCTTAGGGAATTTGTGTTAAGAATATTGATGGTTAT | 22162 |
| gb:MN996528 | Organism:Severe | GGAAAACAGGGTAATTTCAAAAATCTTAGGGAATTTGTGTTAAGAATATTGATGGTTAT | 22162 |
| gb:MN996530 | Organism:Severe | GGAAAACAGGGTAATTTCAAAAATCTTAGGGAATTTGTGTTAAGAATATTGATGGTTAT | 22148 |
| gb:MN908947 | Organism:Severe | GGAAAACAGGGTAATTTCAAAAATCTTAGGGAATTTGTGTTAAGAATATTGATGGTTAT | 22162 |
| gb:MT019532 | Organism:Severe | GGAAAACAGGGTAATTTCAAAAATCTTAGGGAATTTGTGTTAAGAATATTGATGGTTAT | 22162 |

\*\*\*\*\*

|             |                 |                                                           |       |
|-------------|-----------------|-----------------------------------------------------------|-------|
| gb:MT020781 | Organism:Severe | TTTAAATATATTCTAAGCACACGCCTATTAATTTAGTGCATGATCCCTCAGGGTTTT | 22210 |
| gb:MT007544 | Organism:Severe | TTTAAATATATTCTAAGCACACGCCTATTAATTTAGTGCATGATCCCTCAGGGTTTT | 22222 |
| gb:MN994467 | Organism:Severe | TTTAAATATATTCTAAGCACACGCCTATTAATTTAGTGCATGATCCCTCAGGGTTTT | 22222 |
| gb:MT044257 | Organism:Severe | TTTAAATATATTCTAAGCACACGCCTATTAATTTAGTGCATGATCCCTCAGGGTTTT | 22222 |
| gb:MT106054 | Organism:Severe | TTTAAATATATTCTAAGCACACGCCTATTAATTTAGTGCATGATCCCTCAGGGTTTT | 22222 |
| gb:MT049951 | Organism:Severe | TTTAAATATATTCTAAGCACACGCCTATTAATTTAGTGCATGATCCCTCAGGGTTTT | 22222 |

|             |                 |                                         |       |
|-------------|-----------------|-----------------------------------------|-------|
| gb:MN975262 | Organism:Severe | TTTAAATATATTCTAAGCACACGCCTATTAATTTAGTGC | 22222 |
| gb:MT106052 | Organism:Severe | TTTAAATATATTCTAAGCACACGCCTATTAATTTAGTGC | 22222 |
| gb:LC522975 | Organism:Severe | TTTAAATATATTCTAAGCACACGCCTATTAATTTAGTGC | 22219 |
| gb:LC522973 | Organism:Severe | TTTAAATATATTCTAAGCACACGCCTATTAATTTAGTGC | 22219 |
| gb:LC522974 | Organism:Severe | TTTAAATATATTCTAAGCACACGCCTATTAATTTAGTGC | 22219 |
| gb:MN985325 | Organism:Severe | TTTAAATATATTCTAAGCACACGCCTATTAATTTAGTGC | 22222 |
| gb:MT020881 | Organism:Severe | TTTAAATATATTCTAAGCACACGCCTATTAATTTAGTGC | 22222 |
| gb:MT020880 | Organism:Severe | TTTAAATATATTCTAAGCACACGCCTATTAATTTAGTGC | 22222 |
| gb:MT066175 | Organism:Severe | TTTAAATATATTCTAAGCACACGCCTATTAATTTAGTGC | 22222 |
| gb:MN997409 | Organism:Severe | TTTAAATATATTCTAAGCACACGCCTATTAATTTAGTGC | 22222 |
| gb:MN938384 | Organism:Severe | TTTAAATATATTCTAAGCACACGCCTATTAATTTAGTGC | 22190 |
| gb:MT044258 | Organism:Severe | TTTAAATATATTCTAAGCACACGCCTATTAATTTAGTGC | 22198 |
| gb:MT039890 | Organism:Severe | TTTAAATATATTCTAAGCACACGCCTATTAATTTAGTGC | 22222 |
| gb:MN988713 | Organism:Severe | TTTAAATATATTCTAAGCACACGCCTATTAATTTAGTGC | 22222 |
| gb:LC521925 | Organism:Severe | TTTAAATATATTCTAAGCACACGCCTATTAATTTAGTGC | 22195 |
| gb:MT093571 | Organism:Severe | TTTAAATATATTCTAAGCACACGCCTATTAATTTAGTGC | 22222 |
| gb:MT039887 | Organism:Severe | TTTAAATATATTCTAAGCACACGCCTATTAATTTAGTGC | 22219 |
| gb:MT019530 | Organism:Severe | TTTAAATATATTCTAAGCACACGCCTATTAATTTAGTGC | 22222 |
| gb:MT039888 | Organism:Severe | TTTAAATATATTCTAAGCACACGCCTATTAATTTAGTGC | 22222 |
| gb:LC522972 | Organism:Severe | TTTAAATATATTCTAAGCACACGCCTATTAATTTAGTGC | 22219 |
| gb:MT027063 | Organism:Severe | TTTAAATATATTCTAAGCACACGCCTATTAATTTAGTGC | 22222 |
| gb:MT027062 | Organism:Severe | TTTAAATATATTCTAAGCACACGCCTATTAATTTAGTGC | 22222 |
| gb:MT019529 | Organism:Severe | TTTAAATATATTCTAAGCACACGCCTATTAATTTAGTGC | 22222 |
| gb:MN996529 | Organism:Severe | TTTAAATATATTCTAAGCACACGCCTATTAATTTAGTGC | 22210 |
| gb:MN996531 | Organism:Severe | TTTAAATATATTCTAAGCACACGCCTATTAATTTAGTGC | 22209 |
| gb:MT066176 | Organism:Severe | TTTAAATATATTCTAAGCACACGCCTATTAATTTAGTGC | 22222 |
| gb:MT027064 | Organism:Severe | TTTAAATATATTCTAAGCACACGCCTATTAATTTAGTGC | 22222 |
| gb:MN994468 | Organism:Severe | TTTAAATATATTCTAAGCACACGCCTATTAATTTAGTGC | 22222 |
| gb:MT072688 | Organism:Severe | TTTAAATATATTCTAAGCACACGCCTATTAATTTAGTGC | 22207 |
| gb:MN996527 | Organism:Severe | TTTAAATATATTCTAAGCACACGCCTATTAATTTAGTGC | 22189 |
| gb:MT093631 | Organism:Severe | TTTAAATATATTCTAAGCACACGCCTATTAATTTAGTGC | 22260 |
| gb:MT106053 | Organism:Severe | TTTAAATATATTCTAAGCACACGCCTATTAATTTAGTGC | 22222 |
| gb:MT019533 | Organism:Severe | TTTAAATATATTCTAAGCACACGCCTATTAATTTAGTGC | 22222 |
| gb:MT019531 | Organism:Severe | TTTAAATATATTCTAAGCACACGCCTATTAATTTAGTGC | 22222 |
| gb:MN996528 | Organism:Severe | TTTAAATATATTCTAAGCACACGCCTATTAATTTAGTGC | 22222 |
| gb:MN996530 | Organism:Severe | TTTAAATATATTCTAAGCACACGCCTATTAATTTAGTGC | 22208 |
| gb:MN908947 | Organism:Severe | TTTAAATATATTCTAAGCACACGCCTATTAATTTAGTGC | 22222 |
| gb:MT019532 | Organism:Severe | TTTAAATATATTCTAAGCACACGCCTATTAATTTAGTGC | 22222 |

\*\*\*\*\*

|             |                 |                                                           |       |
|-------------|-----------------|-----------------------------------------------------------|-------|
| gb:MT020781 | Organism:Severe | TCGGCTTTAGAACCATTGGTAGATTTGCCAATAGGTATTAACATCACTAGGTTTCAA | 22270 |
| gb:MT007544 | Organism:Severe | TCGGCTTTAGAACCATTGGTAGATTTGCCAATAGGTATTAACATCACTAGGTTTCAA | 22282 |
| gb:MN994467 | Organism:Severe | TCGGCTTTAGAACCATTGGTAGATTTGCCAATAGGTATTAACATCACTAGGTTTCAA | 22282 |
| gb:MT044257 | Organism:Severe | TCGGCTTTAGAACCATTGGTAGATTTGCCAATAGGTATTAACATCACTAGGTTTCAA | 22282 |
| gb:MT106054 | Organism:Severe | TCGGCTTTAGAACCATTGGTAGATTTGCCAATAGGTATTAACATCACTAGGTTTCAA | 22282 |
| gb:MT049951 | Organism:Severe | TCGGCTTTAGAACCATTGGTAGATTTGCCAATAGGTATTAACATCACTAGGTTTCAA | 22282 |
| gb:MN975262 | Organism:Severe | TCGGCTTTAGAACCATTGGTAGATTTGCCAATAGGTATTAACATCACTAGGTTTCAA | 22282 |
| gb:MT106052 | Organism:Severe | TCGGCTTTAGAACCATTGGTAGATTTGCCAATAGGTATTAACATCACTAGGTTTCAA | 22282 |
| gb:LC522975 | Organism:Severe | TCGGCTTTAGAACCATTGGTAGATTTGCCAATAGGTATTAACATCACTAGGTTTCAA | 22279 |
| gb:LC522973 | Organism:Severe | TCGGCTTTAGAACCATTGGTAGATTTGCCAATAGGTATTAACATCACTAGGTTTCAA | 22279 |
| gb:LC522974 | Organism:Severe | TCGGCTTTAGAACCATTGGTAGATTTGCCAATAGGTATTAACATCACTAGGTTTCAA | 22279 |
| gb:MN985325 | Organism:Severe | TCGGCTTTAGAACCATTGGTAGATTTGCCAATAGGTATTAACATCACTAGGTTTCAA | 22282 |
| gb:MT020881 | Organism:Severe | TCGGCTTTAGAACCATTGGTAGATTTGCCAATAGGTATTAACATCACTAGGTTTCAA | 22282 |
| gb:MT020880 | Organism:Severe | TCGGCTTTAGAACCATTGGTAGATTTGCCAATAGGTATTAACATCACTAGGTTTCAA | 22282 |
| gb:MT066175 | Organism:Severe | TCGGCTTTAGAACCATTGGTAGATTTGCCAATAGGTATTAACATCACTAGGTTTCAA | 22282 |
| gb:MN997409 | Organism:Severe | TCGGCTTTAGAACCATTGGTAGATTTGCCAATAGGTATTAACATCACTAGGTTTCAA | 22282 |
| gb:MN938384 | Organism:Severe | TCGGCTTTAGAACCATTGGTAGATTTGCCAATAGGTATTAACATCACTAGGTTTCAA | 22250 |
| gb:MT044258 | Organism:Severe | TCGGCTTTAGAACCATTGGTAGATTTGCCAATAGGTATTAACATCACTAGGTTTCAA | 22258 |
| gb:MT039890 | Organism:Severe | TGGGCTTTAGAACCATTGGTAGATTTGCCAATAGGTATTAACATCACTAGGTTTCAA | 22282 |
| gb:MN988713 | Organism:Severe | TCGGCTTTAGAACCATTGGTAGATTTGCCAATAGGTATTAACATCACTAGGTTTCAA | 22282 |
| gb:LC521925 | Organism:Severe | TCGGCTTTAGAACCATTGGTAGATTTGCCAATAGGTATTAACATCACTAGGTTTCAA | 22255 |
| gb:MT093571 | Organism:Severe | TCGGCTTTAGAACCATTGGTAGATTTGCCAATAGGTATTAACATCACTAGGTTTCAA | 22282 |
| gb:MT039887 | Organism:Severe | TCGGCTTTAGAACCATTGGTAGATTTGCCAATAGGTATTAACATCACTAGGTTTCAA | 22279 |
| gb:MT019530 | Organism:Severe | TCGGCTTTAGAACCATTGGTAGATTTGCCAATAGGTATTAACATCACTAGGTTTCAA | 22282 |
| gb:MT039888 | Organism:Severe | TCGGCTTTAGAACCATTGGTAGATTTGCCAATAGGTATTAACATCACTAGGTTTCAA | 22282 |



|             |                 |                                                             |       |
|-------------|-----------------|-------------------------------------------------------------|-------|
| gb:LC522972 | Organism:Severe | TCGGCTTTAGAACCATTGGTAGATTTGCCAATAGGTATTAACATCACTAGGTTTCAAAC | 22279 |
| gb:MT027063 | Organism:Severe | TCGGCTTTAGAACCATTGGTAGATTTGCCAATAGGTATTAACATCACTAGGTTTCAAAC | 22282 |
| gb:MT027062 | Organism:Severe | TCGGCTTTAGAACCATTGGTAGATTTGCCAATAGGTATTAACATCACTAGGTTTCAAAC | 22282 |
| gb:MT019529 | Organism:Severe | TCGGCTTTAGAACCATTGGTAGATTTGCCAATAGGTATTAACATCACTAGGTTTCAAAC | 22282 |
| gb:MN996529 | Organism:Severe | TCGGCTTTAGAACCATTGGTAGATTTGCCAATAGGTATTAACATCACTAGGTTTCAAAC | 22270 |
| gb:MN996531 | Organism:Severe | TCGGCTTTAGAACCATTGGTAGATTTGCCAATAGGTATTAACATCACTAGGTTTCAAAC | 22269 |
| gb:MT066176 | Organism:Severe | TCGGCTTTAGAACCATTGGTAGATTTGCCAATAGGTATTAACATCACTAGGTTTCAAAC | 22282 |
| gb:MT027064 | Organism:Severe | TCGGCTTTAGAACCATTGGTAGATTTGCCAATAGGTATTAACATCACTAGGTTTCAAAC | 22282 |
| gb:MN994468 | Organism:Severe | TCGGCTTTAGAACCATTGGTAGATTTGCCAATAGGTATTAACATCACTAGGTTTCAAAC | 22282 |
| gb:MT072688 | Organism:Severe | TCGGCTTTAGAACCATTGGTAGATTTGCCAATAGGTATTAACATCACTAGGTTTCAAAC | 22267 |
| gb:MN996527 | Organism:Severe | TCGGCTTTAGAACCATTGGTAGATTTGCCAATAGGTATTAACATCACTAGGTTTCAAAC | 22249 |
| gb:MT093631 | Organism:Severe | TCGGCTTTAGAACCATTGGTAGATTTGCCAATAGGTATTAACATCACTAGGTTTCAAAC | 22320 |
| gb:MT106053 | Organism:Severe | TCGGCTTTAGAACCATTGGTAGATTTGCCAATAGGTATTAACATCACTAGGTTTCAAAC | 22282 |
| gb:MT019533 | Organism:Severe | TCGGCTTTAGAACCATTGGTAGATTTGCCAATAGGTATTAACATCACTAGGTTTCAAAC | 22282 |
| gb:MT019531 | Organism:Severe | TCGGCTTTAGAACCATTGGTAGATTTGCCAATAGGTATTAACATCACTAGGTTTCAAAC | 22282 |
| gb:MN996528 | Organism:Severe | TCGGCTTTAGAACCATTGGTAGATTTGCCAATAGGTATTAACATCACTAGGTTTCAAAC | 22282 |
| gb:MN996530 | Organism:Severe | TCGGCTTTAGAACCATTGGTAGATTTGCCAATAGGTATTAACATCACTAGGTTTCAAAC | 22268 |
| gb:MN908947 | Organism:Severe | TCGGCTTTAGAACCATTGGTAGATTTGCCAATAGGTATTAACATCACTAGGTTTCAAAC | 22282 |
| gb:MT019532 | Organism:Severe | TCGGCTTTAGAACCATTGGTAGATTTGCCAATAGGTATTAACATCACTAGGTTTCAAAC | 22282 |

\* \*\*\*\*\*

|             |                 |                                                              |       |
|-------------|-----------------|--------------------------------------------------------------|-------|
| gb:MT020781 | Organism:Severe | TTACTTGCTTTACATAGAAGTTATTTGACTCCTGGTGATTCTTCTTCAGGTTGGACAGCT | 22330 |
| gb:MT007544 | Organism:Severe | TTACTTGCTTTACATAGAAGTTATTTGACTCCTGGTGATTCTTCTTCAGGTTGGACAGCT | 22342 |
| gb:MN994467 | Organism:Severe | TTACTTGCTTTACATAGAAGTTATTTGACTCCTGGTGATTCTTCTTCAGGTTGGACAGCT | 22342 |
| gb:MT044257 | Organism:Severe | TTACTTGCTTTACATAGAAGTTATTTGACTCCTGGTGATTCTTCTTCAGGTTGGACAGCT | 22342 |
| gb:MT106054 | Organism:Severe | TTACTTGCTTTACATAGAAGTTATTTGACTCCTGGTGATTCTTCTTCAGGTTGGACAGCT | 22342 |
| gb:MT049951 | Organism:Severe | TTACTTGCTTTACATAGAAGTTATTTGACTCCTGGTGATTCTTCTTCAGGTTGGACAGCT | 22342 |
| gb:MN975262 | Organism:Severe | TTACTTGCTTTACATAGAAGTTATTTGACTCCTGGTGATTCTTCTTCAGGTTGGACAGCT | 22342 |
| gb:MT106052 | Organism:Severe | TTACTTGCTTTACATAGAAGTTATTTGACTCCTGGTGATTCTTCTTCAGGTTGGACAGCT | 22342 |
| gb:LC522975 | Organism:Severe | TTACTTGCTTTACATAGAAGTTATTTGACTCCTGGTGATTCTTCTTCAGGTTGGACAGCT | 22339 |
| gb:LC522973 | Organism:Severe | TTACTTGCTTTACATAGAAGTTATTTGACTCCTGGTGATTCTTCTTCAGGTTGGACAGCT | 22339 |
| gb:LC522974 | Organism:Severe | TTACTTGCTTTACATAGAAGTTATTTGACTCCTGGTGATTCTTCTTCAGGTTGGACAGCT | 22339 |
| gb:MN985325 | Organism:Severe | TTACTTGCTTTACATAGAAGTTATTTGACTCCTGGTGATTCTTCTTCAGGTTGGACAGCT | 22342 |
| gb:MT020881 | Organism:Severe | TTACTTGCTTTACATAGAAGTTATTTGACTCCTGGTGATTCTTCTTCAGGTTGGACAGCT | 22342 |
| gb:MT020880 | Organism:Severe | TTACTTGCTTTACATAGAAGTTATTTGACTCCTGGTGATTCTTCTTCAGGTTGGACAGCT | 22342 |
| gb:MT066175 | Organism:Severe | TTACTTGCTTTACATAGAAGTTATTTGACTCCTGGTGATTCTTCTTCAGGTTGGACAGCT | 22342 |
| gb:MN997409 | Organism:Severe | TTACTTGCTTTACATAGAAGTTATTTGACTCCTGGTGATTCTTCTTCAGGTTGGACAGCT | 22342 |
| gb:MN938384 | Organism:Severe | TTACTTGCTTTACATAGAAGTTATTTGACTCCTGGTGATTCTTCTTCAGGTTGGACAGCT | 22310 |
| gb:MT044258 | Organism:Severe | TTACTTGCTTTACATAGAAGTTATTTGACTCCTGGTGATTCTTCTTCAGGTTGGACAGCT | 22318 |
| gb:MT039890 | Organism:Severe | TTACTTGCTTTACATAGAAGTTATTTGACTCCTGGTGATTCTTCTTCAGGTTGGACAGCT | 22342 |
| gb:MN988713 | Organism:Severe | TTACTTGCTTTACATAGAAGTTATTTGACTCCTGGTGATTCTTCTTCAGGTTGGACAGCT | 22342 |
| gb:LC521925 | Organism:Severe | TTACTTGCTTTACATAGAAGTTATTTGACTCCTGGTGATTCTTCTTCAGGTTGGACAGCT | 22315 |
| gb:MT093571 | Organism:Severe | TTACTTGCTTTACATAGAAGTTATTTGACTCCTGGTGATTCTTCTTCAGGTTGGACAGCT | 22342 |
| gb:MT039887 | Organism:Severe | TTACTTGCTTTACATAGAAGTTATTTGACTCCTGGTGATTCTTCTTCAGGTTGGACAGCT | 22339 |
| gb:MT019530 | Organism:Severe | TTACTTGCTTTACATAGAAGTTATTTGACTCCTGGTGATTCTTCTTCAGGTTGGACAGCT | 22342 |
| gb:MT039888 | Organism:Severe | TTACTTGCTTTACATAGAAGTTATTTGACTCCTGGTGATTCTTCTTCAGGTTGGACAGCT | 22342 |
| gb:LC522972 | Organism:Severe | TTACTTGCTTTACATAGAAGTTATTTGACTCCTGGTGATTCTTCTTCAGGTTGGACAGCT | 22339 |
| gb:MT027063 | Organism:Severe | TTACTTGCTTTACATAGAAGTTATTTGACTCCTGGTGATTCTTCTTCAGGTTGGACAGCT | 22342 |
| gb:MT027062 | Organism:Severe | TTACTTGCTTTACATAGAAGTTATTTGACTCCTGGTGATTCTTCTTCAGGTTGGACAGCT | 22342 |
| gb:MT019529 | Organism:Severe | TTACTTGCTTTACATAGAAGTTATTTGACTCCTGGTGATTCTTCTTCAGGTTGGACAGCT | 22342 |
| gb:MN996529 | Organism:Severe | TTACTTGCTTTACATAGAAGTTATTTGACTCCTGGTGATTCTTCTTCAGGTTGGACAGCT | 22330 |
| gb:MN996531 | Organism:Severe | TTACTTGCTTTACATAGAAGTTATTTGACTCCTGGTGATTCTTCTTCAGGTTGGACAGCT | 22329 |
| gb:MT066176 | Organism:Severe | TTACTTGCTTTACATAGAAGTTATTTGACTCCTGGTGATTCTTCTTCAGGTTGGACAGCT | 22342 |
| gb:MT027064 | Organism:Severe | TTACTTGCTTTACATAGAAGTTATTTGACTCCTGGTGATTCTTCTTCAGGTTGGACAGCT | 22342 |
| gb:MN994468 | Organism:Severe | TTACTTGCTTTACATAGAAGTTATTTGACTCCTGGTGATTCTTCTTCAGGTTGGACAGCT | 22342 |
| gb:MT072688 | Organism:Severe | TTACTTGCTTTACATAGAAGTTATTTGACTCCTGGTGATTCTTCTTCAGGTTGGACAGCT | 22327 |
| gb:MN996527 | Organism:Severe | TTACTTGCTTTACATAGAAGTTATTTGACTCCTGGTGATTCTTCTTCAGGTTGGACAGCT | 22309 |
| gb:MT093631 | Organism:Severe | TTACTTGCTTTACATAGAAGTTATTTGACTCCTGGTGATTCTTCTTCAGGTTGGACAGCT | 22380 |
| gb:MT106053 | Organism:Severe | TTACTTGCTTTACATAGAAGTTATTTGACTCCTGGTGATTCTTCTTCAGGTTGGACAGCT | 22342 |
| gb:MT019533 | Organism:Severe | TTACTTGCTTTACATAGAAGTTATTTGACTCCTGGTGATTCTTCTTCAGGTTGGACAGCT | 22342 |
| gb:MT019531 | Organism:Severe | TTACTTGCTTTACATAGAAGTTATTTGACTCCTGGTGATTCTTCTTCAGGTTGGACAGCT | 22342 |
| gb:MN996528 | Organism:Severe | TTACTTGCTTTACATAGAAGTTATTTGACTCCTGGTGATTCTTCTTCAGGTTGGACAGCT | 22342 |
| gb:MN996530 | Organism:Severe | TTACTTGCTTTACATAGAAGTTATTTGACTCCTGGTGATTCTTCTTCAGGTTGGACAGCT | 22328 |
| gb:MN908947 | Organism:Severe | TTACTTGCTTTACATAGAAGTTATTTGACTCCTGGTGATTCTTCTTCAGGTTGGACAGCT | 22342 |
| gb:MT019532 | Organism:Severe | TTACTTGCTTTACATAGAAGTTATTTGACTCCTGGTGATTCTTCTTCAGGTTGGACAGCT | 22342 |



|             |                 |                                                                     |       |
|-------------|-----------------|---------------------------------------------------------------------|-------|
| gb:MT044258 | Organism:Severe | GAAATGGAACCATTACAGATGCTGTAGACTGTGCACTTGACCTCTCTCAGAAACAAAG          | 22438 |
| gb:MT039890 | Organism:Severe | GAAATGGAACCATTACAGATGCTGTAGACTGTGCACTTGACCTCTCTCAGAAACAAAG          | 22462 |
| gb:MN988713 | Organism:Severe | GAAATGGAACCATTACAGATGCTGTAGACTGTGCACTTGACCTCTCTCAGAAACAAAG          | 22462 |
| gb:LC521925 | Organism:Severe | GAAATGGAACCATTACAGATGCTGTAGACTGTGCACTTGACCTCTCTCAGAAACAAAG          | 22435 |
| gb:MT093571 | Organism:Severe | GAAATGGAACCATTACAGATGCTGTAGACTGTGCACTTGACCTCTCTCAGAAACAAAG          | 22462 |
| gb:MT039887 | Organism:Severe | GAAATGGAACCATTACAGATGCTGTAGACTGTGCACTTGACCTCTCTCAGAAACAAAG          | 22459 |
| gb:MT019530 | Organism:Severe | GAAATGGAACCATTACAGATGCTGTAGACTGTGCACTTGACCTCTCTCAGAAACAAAG          | 22462 |
| gb:MT039888 | Organism:Severe | GAAATGGAACCATTACAGATGCTGTAGACTGTGCACTTGACCTCTCTCAGAAACAAAG          | 22462 |
| gb:LC522972 | Organism:Severe | GAAATGGAACCATTACAGATGCTGTAGACTGTGCACTTGACCTCTCTCAGAAACAAAG          | 22459 |
| gb:MT027063 | Organism:Severe | GAAATGGAACCATTACAGATGCTGTAGACTGTGCACTTGACCTCTCTCAGAAACAAAG          | 22462 |
| gb:MT027062 | Organism:Severe | GAAATGGAACCATTACAGATGCTGTAGACTGTGCACTTGACCTCTCTCAGAAACAAAG          | 22462 |
| gb:MT019529 | Organism:Severe | GAAATGGAACCATTACAGATGCTGTAGACTGTGCACTTGACCTCTCTCAGAAACAAAG          | 22462 |
| gb:MN996529 | Organism:Severe | GAAATGGAACCATTACAGATGCTGTAGACTGTGCACTTGACCTCTCTCAGAAACAAAG          | 22450 |
| gb:MN996531 | Organism:Severe | GAAATGGAACCATTACAGATGCTGTAGACTGTGCACTTGACCTCTCTCAGAAACAAAG          | 22449 |
| gb:MT066176 | Organism:Severe | GAAATGGAACCATTACAGATGCTGTAGACTGTGCACTTGACCTCTCTCAGAAACAAAG          | 22462 |
| gb:MT027064 | Organism:Severe | GAAATGGAACCATTACAGATGCTGTAGACTGTGCACTTGACCTCTCTCAGAAACAAAG          | 22462 |
| gb:MN994468 | Organism:Severe | GAAATGGAACCATTACAGATGCTGTAGACTGTGCACTTGACCTCTCTCAGAAACAAAG          | 22462 |
| gb:MT072688 | Organism:Severe | GAAATGGAACCATTACAGATGCTGTAGACTGTGCACTTGACCTCTCTCAGAAACAAAG          | 22447 |
| gb:MN996527 | Organism:Severe | GAAATGGAACCATTACAGATGCTGTAGACTGTGCACTTGACCTCTCTCAGAAACAAAG          | 22429 |
| gb:MT093631 | Organism:Severe | GAAATGGAACCATTACAGATGCTGTAGACTGTGCACTTGACCTCTCTCAGAAACAAAG          | 22500 |
| gb:MT106053 | Organism:Severe | GAAATGGAACCATTACAGATGCTGTAGACTGTGCACTTGACCTCTCTCAGAAACAAAG          | 22462 |
| gb:MT019533 | Organism:Severe | GAAATGGAACCATTACAGATGCTGTAGACTGTGCACTTGACCTCTCTCAGAAACAAAG          | 22462 |
| gb:MT019531 | Organism:Severe | GAAATGGAACCATTACAGATGCTGTAGACTGTGCACTTGACCTCTCTCAGAAACAAAG          | 22462 |
| gb:MN996528 | Organism:Severe | GAAATGGAACCATTACAGATGCTGTAGACTGTGCACTTGACCTCTCTCAGAAACAAAG          | 22462 |
| gb:MN996530 | Organism:Severe | GAAATGGAACCATTACAGATGCTGTAGACTGTGCACTTGACCTCTCTCAGAAACAAAG          | 22448 |
| gb:MN908947 | Organism:Severe | GAAATGGAACCATTACAGATGCTGTAGACTGTGCACTTGACCTCTCTCAGAAACAAAG          | 22462 |
| gb:MT019532 | Organism:Severe | GAAATGGAACCATTACAGATGCTGTAGACTGTGCACTTGACCTCTCTCAGAAACAAAG<br>***** | 22462 |

|             |                 |                                                             |       |
|-------------|-----------------|-------------------------------------------------------------|-------|
| gb:MT020781 | Organism:Severe | TGTACGTTGAAATCCTTCACTGTAGAAAAAGGAATCTATCAAACCTTAACCTTAGAGTC | 22510 |
| gb:MT007544 | Organism:Severe | TGTACGTTGAAATCCTTCACTGTAGAAAAAGGAATCTATCAAACCTTAACCTTAGAGTC | 22522 |
| gb:MN994467 | Organism:Severe | TGTACGTTGAAATCCTTCACTGTAGAAAAAGGAATCTATCAAACCTTAACCTTAGAGTC | 22522 |
| gb:MT044257 | Organism:Severe | TGTACGTTGAAATCCTTCACTGTAGAAAAAGGAATCTATCAAACCTTAACCTTAGAGTC | 22522 |
| gb:MT106054 | Organism:Severe | TGTACGTTGAAATCCTTCACTGTAGAAAAAGGAATCTATCAAACCTTAACCTTAGAGTC | 22522 |
| gb:MT049951 | Organism:Severe | TGTACGTTGAAATCCTTCACTGTAGAAAAAGGAATCTATCAAACCTTAACCTTAGAGTC | 22522 |
| gb:MN975262 | Organism:Severe | TGTACGTTGAAATCCTTCACTGTAGAAAAAGGAATCTATCAAACCTTAACCTTAGAGTC | 22522 |
| gb:MT106052 | Organism:Severe | TGTACGTTGAAATCCTTCACTGTAGAAAAAGGAATCTATCAAACCTTAACCTTAGAGTC | 22522 |
| gb:LC522975 | Organism:Severe | TGTACGTTGAAATCCTTCACTGTAGAAAAAGGAATCTATCAAACCTTAACCTTAGAGTC | 22519 |
| gb:LC522973 | Organism:Severe | TGTACGTTGAAATCCTTCACTGTAGAAAAAGGAATCTATCAAACCTTAACCTTAGAGTC | 22519 |
| gb:LC522974 | Organism:Severe | TGTACGTTGAAATCCTTCACTGTAGAAAAAGGAATCTATCAAACCTTAACCTTAGAGTC | 22519 |
| gb:MN985325 | Organism:Severe | TGTACGTTGAAATCCTTCACTGTAGAAAAAGGAATCTATCAAACCTTAACCTTAGAGTC | 22522 |
| gb:MT020881 | Organism:Severe | TGTACGTTGAAATCCTTCACTGTAGAAAAAGGAATCTATCAAACCTTAACCTTAGAGTC | 22522 |
| gb:MT020880 | Organism:Severe | TGTACGTTGAAATCCTTCACTGTAGAAAAAGGAATCTATCAAACCTTAACCTTAGAGTC | 22522 |
| gb:MT066175 | Organism:Severe | TGTACGTTGAAATCCTTCACTGTAGAAAAAGGAATCTATCAAACCTTAACCTTAGAGTC | 22522 |
| gb:MN997409 | Organism:Severe | TGTACGTTGAAATCCTTCACTGTAGAAAAAGGAATCTATCAAACCTTAACCTTAGAGTC | 22522 |
| gb:MN938384 | Organism:Severe | TGTACGTTGAAATCCTTCACTGTAGAAAAAGGAATCTATCAAACCTTAACCTTAGAGTC | 22490 |
| gb:MT044258 | Organism:Severe | TGTACGTTGAAATCCTTCACTGTAGAAAAAGGAATCTATCAAACCTTAACCTTAGAGTC | 22498 |
| gb:MT039890 | Organism:Severe | TGTACGTTGAAATCCTTCACTGTAGAAAAAGGAATCTATCAAACCTTAACCTTAGAGTC | 22522 |
| gb:MN988713 | Organism:Severe | TGTACGTTGAAATCCTTCACTGTAGAAAAAGGAATCTATCAAACCTTAACCTTAGAGTC | 22522 |
| gb:LC521925 | Organism:Severe | TGTACGTTGAAATCCTTCACTGTAGAAAAAGGAATCTATCAAACCTTAACCTTAGAGTC | 22495 |
| gb:MT093571 | Organism:Severe | TGTACGTTGAAATCCTTCACTGTAGAAAAAGGAATCTATCAAACCTTAACCTTAGAGTC | 22522 |
| gb:MT039887 | Organism:Severe | TGTACGTTGAAATCCTTCACTGTAGAAAAAGGAATCTATCAAACCTTAACCTTAGAGTC | 22519 |
| gb:MT019530 | Organism:Severe | TGTACGTTGAAATCCTTCACTGTAGAAAAAGGAATCTATCAAACCTTAACCTTAGAGTC | 22522 |
| gb:MT039888 | Organism:Severe | TGTACGTTGAAATCCTTCACTGTAGAAAAAGGAATCTATCAAACCTTAACCTTAGAGTC | 22522 |
| gb:LC522972 | Organism:Severe | TGTACGTTGAAATCCTTCACTGTAGAAAAAGGAATCTATCAAACCTTAACCTTAGAGTC | 22519 |
| gb:MT027063 | Organism:Severe | TGTACGTTGAAATCCTTCACTGTAGAAAAAGGAATCTATCAAACCTTAACCTTAGAGTC | 22522 |
| gb:MT027062 | Organism:Severe | TGTACGTTGAAATCCTTCACTGTAGAAAAAGGAATCTATCAAACCTTAACCTTAGAGTC | 22522 |
| gb:MT019529 | Organism:Severe | TGTACGTTGAAATCCTTCACTGTAGAAAAAGGAATCTATCAAACCTTAACCTTAGAGTC | 22522 |
| gb:MN996529 | Organism:Severe | TGTACGTTGAAATCCTTCACTGTAGAAAAAGGAATCTATCAAACCTTAACCTTAGAGTC | 22510 |
| gb:MN996531 | Organism:Severe | TGTACGTTGAAATCCTTCACTGTAGAAAAAGGAATCTATCAAACCTTAACCTTAGAGTC | 22509 |
| gb:MT066176 | Organism:Severe | TGTACGTTGAAATCCTTCACTGTAGAAAAAGGAATCTATCAAACCTTAACCTTAGAGTC | 22522 |
| gb:MT027064 | Organism:Severe | TGTACGTTGAAATCCTTCACTGTAGAAAAAGGAATCTATCAAACCTTAACCTTAGAGTC | 22522 |
| gb:MN994468 | Organism:Severe | TGTACGTTGAAATCCTTCACTGTAGAAAAAGGAATCTATCAAACCTTAACCTTAGAGTC | 22522 |
| gb:MT072688 | Organism:Severe | TGTACGTTGAAATCCTTCACTGTAGAAAAAGGAATCTATCAAACCTTAACCTTAGAGTC | 22507 |
| gb:MN996527 | Organism:Severe | TGTACGTTGAAATCCTTCACTGTAGAAAAAGGAATCTATCAAACCTTAACCTTAGAGTC | 22489 |

|             |                 |                                                              |       |
|-------------|-----------------|--------------------------------------------------------------|-------|
| gb:MT093631 | Organism:Severe | TGTACGTTGAAATCCTTCACTGTAGAAAAAGGAATCTATCAAACCTCTAACTTTAGAGTC | 22560 |
| gb:MT106053 | Organism:Severe | TGTACGTTGAAATCCTTCACTGTAGAAAAAGGAATCTATCAAACCTCTAACTTTAGAGTC | 22522 |
| gb:MT019533 | Organism:Severe | TGTACGTTGAAATCCTTCACTGTAGAAAAAGGAATCTATCAAACCTCTAACTTTAGAGTC | 22522 |
| gb:MT019531 | Organism:Severe | TGTACGTTGAAATCCTTCACTGTAGAAAAAGGAATCTATCAAACCTCTAACTTTAGAGTC | 22522 |
| gb:MN996528 | Organism:Severe | TGTACGTTGAAATCCTTCACTGTAGAAAAAGGAATCTATCAAACCTCTAACTTTAGAGTC | 22522 |
| gb:MN996530 | Organism:Severe | TGTACGTTGAAATCCTTCACTGTAGAAAAAGGAATCTATCAAACCTCTAACTTTAGAGTC | 22508 |
| gb:MN908947 | Organism:Severe | TGTACGTTGAAATCCTTCACTGTAGAAAAAGGAATCTATCAAACCTCTAACTTTAGAGTC | 22522 |
| gb:MT019532 | Organism:Severe | TGTACGTTGAAATCCTTCACTGTAGAAAAAGGAATCTATCAAACCTCTAACTTTAGAGTC | 22522 |

\*\*\*\*\*

|             |                 |                                                             |       |
|-------------|-----------------|-------------------------------------------------------------|-------|
| gb:MT020781 | Organism:Severe | CAACCAACAGAATCTATTGTTAGATTTCTAATATTACAAACTTGTGCCCTTTTGGTGAA | 22570 |
| gb:MT007544 | Organism:Severe | CAACCAACAGAATCTATTGTTAGATTTCTAATATTACAAACTTGTGCCCTTTTGGTGAA | 22582 |
| gb:MN994467 | Organism:Severe | CAACCAACAGAATCTATTGTTAGATTTCTAATATTACAAACTTGTGCCCTTTTGGTGAA | 22582 |
| gb:MT044257 | Organism:Severe | CAACCAACAGAATCTATTGTTAGATTTCTAATATTACAAACTTGTGCCCTTTTGGTGAA | 22582 |
| gb:MT106054 | Organism:Severe | CAACCAACAGAATCTATTGTTAGATTTCTAATATTACAAACTTGTGCCCTTTTGGTGAA | 22582 |
| gb:MT049951 | Organism:Severe | CAACCAACAGAATCTATTGTTAGATTTCTAATATTACAAACTTGTGCCCTTTTGGTGAA | 22582 |
| gb:MN975262 | Organism:Severe | CAACCAACAGAATCTATTGTTAGATTTCTAATATTACAAACTTGTGCCCTTTTGGTGAA | 22582 |
| gb:MT106052 | Organism:Severe | CAACCAACAGAATCTATTGTTAGATTTCTAATATTACAAACTTGTGCCCTTTTGGTGAA | 22582 |
| gb:LC522975 | Organism:Severe | CAACCAACAGAATCTATTGTTAGATTTCTAATATTACAAACTTGTGCCCTTTTGGTGAA | 22579 |
| gb:LC522973 | Organism:Severe | CAACCAACAGAATCTATTGTTAGATTTCTAATATTACAAACTTGTGCCCTTTTGGTGAA | 22579 |
| gb:LC522974 | Organism:Severe | CAACCAACAGAATCTATTGTTAGATTTCTAATATTACAAACTTGTGCCCTTTTGGTGAA | 22579 |
| gb:MN985325 | Organism:Severe | CAACCAACAGAATCTATTGTTAGATTTCTAATATTACAAACTTGTGCCCTTTTGGTGAA | 22582 |
| gb:MT020881 | Organism:Severe | CAACCAACAGAATCTATTGTTAGATTTCTAATATTACAAACTTGTGCCCTTTTGGTGAA | 22582 |
| gb:MT020880 | Organism:Severe | CAACCAACAGAATCTATTGTTAGATTTCTAATATTACAAACTTGTGCCCTTTTGGTGAA | 22582 |
| gb:MT066175 | Organism:Severe | CAACCAACAGAATCTATTGTTAGATTTCTAATATTACAAACTTGTGCCCTTTTGGTGAA | 22582 |
| gb:MN997409 | Organism:Severe | CAACCAACAGAATCTATTGTTAGATTTCTAATATTACAAACTTGTGCCCTTTTGGTGAA | 22582 |
| gb:MN938384 | Organism:Severe | CAACCAACAGAATCTATTGTTAGATTTCTAATATTACAAACTTGTGCCCTTTTGGTGAA | 22550 |
| gb:MT044258 | Organism:Severe | CAACCAACAGAATCTATTGTTAGATTTCTAATATTACAAACTTGTGCCCTTTTGGTGAA | 22558 |
| gb:MT039890 | Organism:Severe | CAACCAACAGAATCTATTGTTAGATTTCTAATATTACAAACTTGTGCCCTTTTGGTGAA | 22582 |
| gb:MN988713 | Organism:Severe | CAACCAACAGAATCTATTGTTAGATTTCTAATATTACAAACTTGTGCCCTTTTGGTGAA | 22582 |
| gb:LC521925 | Organism:Severe | CAACCAACAGAATCTATTGTTAGATTTCTAATATTACAAACTTGTGCCCTTTTGGTGAA | 22555 |
| gb:MT093571 | Organism:Severe | CAACCAACAGAATCTATTGTTAGATTTCTAATATTACAAACTTGTGCCCTTTTGGTGAA | 22582 |
| gb:MT039887 | Organism:Severe | CAACCAACAGAATCTATTGTTAGATTTCTAATATTACAAACTTGTGCCCTTTTGGTGAA | 22579 |
| gb:MT019530 | Organism:Severe | CAACCAACAGAATCTATTGTTAGATTTCTAATATTACAAACTTGTGCCCTTTTGGTGAA | 22582 |
| gb:MT039888 | Organism:Severe | CAACCAACAGAATCTATTGTTAGATTTCTAATATTACAAACTTGTGCCCTTTTGGTGAA | 22582 |
| gb:LC522972 | Organism:Severe | CAACCAACAGAATCTATTGTTAGATTTCTAATATTACAAACTTGTGCCCTTTTGGTGAA | 22579 |
| gb:MT027063 | Organism:Severe | CAACCAACAGAATCTATTGTTAGATTTCTAATATTACAAACTTGTGCCCTTTTGGTGAA | 22582 |
| gb:MT027062 | Organism:Severe | CAACCAACAGAATCTATTGTTAGATTTCTAATATTACAAACTTGTGCCCTTTTGGTGAA | 22582 |
| gb:MT019529 | Organism:Severe | CAACCAACAGAATCTATTGTTAGATTTCTAATATTACAAACTTGTGCCCTTTTGGTGAA | 22582 |
| gb:MN996529 | Organism:Severe | CAACCAACAGAATCTATTGTTAGATTTCTAATATTACAAACTTGTGCCCTTTTGGTGAA | 22570 |
| gb:MN996531 | Organism:Severe | CAACCAACAGAATCTATTGTTAGATTTCTAATATTACAAACTTGTGCCCTTTTGGTGAA | 22569 |
| gb:MT066176 | Organism:Severe | CAACCAACAGAATCTATTGTTAGATTTCTAATATTACAAACTTGTGCCCTTTTGGTGAA | 22582 |
| gb:MT027064 | Organism:Severe | CAACCAACAGAATCTATTGTTAGATTTCTAATATTACAAACTTGTGCCCTTTTGGTGAA | 22582 |
| gb:MN994468 | Organism:Severe | CAACCAACAGAATCTATTGTTAGATTTCTAATATTACAAACTTGTGCCCTTTTGGTGAA | 22582 |
| gb:MT072688 | Organism:Severe | CAACCAACAGAATCTATTGTTAGATTTCTAATATTACAAACTTGTGCCCTTTTGGTGAA | 22567 |
| gb:MN996527 | Organism:Severe | CAACCAACAGAATCTATTGTTAGATTTCTAATATTACAAACTTGTGCCCTTTTGGTGAA | 22549 |
| gb:MT093631 | Organism:Severe | CAACCAACAGAATCTATTGTTAGATTTCTAATATTACAAACTTGTGCCCTTTTGGTGAA | 22620 |
| gb:MT106053 | Organism:Severe | CAACCAACAGAATCTATTGTTAGATTTCTAATATTACAAACTTGTGCCCTTTTGGTGAA | 22582 |
| gb:MT019533 | Organism:Severe | CAACCAACAGAATCTATTGTTAGATTTCTAATATTACAAACTTGTGCCCTTTTGGTGAA | 22582 |
| gb:MT019531 | Organism:Severe | CAACCAACAGAATCTATTGTTAGATTTCTAATATTACAAACTTGTGCCCTTTTGGTGAA | 22582 |
| gb:MN996528 | Organism:Severe | CAACCAACAGAATCTATTGTTAGATTTCTAATATTACAAACTTGTGCCCTTTTGGTGAA | 22582 |
| gb:MN996530 | Organism:Severe | CAACCAACAGAATCTATTGTTAGATTTCTAATATTACAAACTTGTGCCCTTTTGGTGAA | 22568 |
| gb:MN908947 | Organism:Severe | CAACCAACAGAATCTATTGTTAGATTTCTAATATTACAAACTTGTGCCCTTTTGGTGAA | 22582 |
| gb:MT019532 | Organism:Severe | CAACCAACAGAATCTATTGTTAGATTTCTAATATTACAAACTTGTGCCCTTTTGGTGAA | 22582 |

\*\*\*\*\*

|             |                 |                                                               |       |
|-------------|-----------------|---------------------------------------------------------------|-------|
| gb:MT020781 | Organism:Severe | GTTTTTAAACGCCACCAGATTTGCATCTGTTTATGCTTGGAACAGGAAGAGAATCAGCAAC | 22630 |
| gb:MT007544 | Organism:Severe | GTTTTTAAACGCCACCAGATTTGCATCTGTTTATGCTTGGAACAGGAAGAGAATCAGCAAC | 22642 |
| gb:MN994467 | Organism:Severe | GTTTTTAAACGCCACCAGATTTGCATCTGTTTATGCTTGGAACAGGAAGAGAATCAGCAAC | 22642 |
| gb:MT044257 | Organism:Severe | GTTTTTAAACGCCACCAGATTTGCATCTGTTTATGCTTGGAACAGGAAGAGAATCAGCAAC | 22642 |
| gb:MT106054 | Organism:Severe | GTTTTTAAACGCCACCAGATTTGCATCTGTTTATGCTTGGAACAGGAAGAGAATCAGCAAC | 22642 |
| gb:MT049951 | Organism:Severe | GTTTTTAAACGCCACCAGATTTGCATCTGTTTATGCTTGGAACAGGAAGAGAATCAGCAAC | 22642 |
| gb:MN975262 | Organism:Severe | GTTTTTAAACGCCACCAGATTTGCATCTGTTTATGCTTGGAACAGGAAGAGAATCAGCAAC | 22642 |
| gb:MT106052 | Organism:Severe | GTTTTTAAACGCCACCAGATTTGCATCTGTTTATGCTTGGAACAGGAAGAGAATCAGCAAC | 22642 |
| gb:LC522975 | Organism:Severe | GTTTTTAAACGCCACCAGATTTGCATCTGTTTATGCTTGGAACAGGAAGAGAATCAGCAAC | 22639 |

|             |                 |                                                             |       |
|-------------|-----------------|-------------------------------------------------------------|-------|
| gb:LC522973 | Organism:Severe | GTTTTTAACGCCACCAGATTTGCATCTGTTTATGCTTGAACAGGAAGAGAATCAGCAAC | 22639 |
| gb:LC522974 | Organism:Severe | GTTTTTAACGCCACCAGATTTGCATCTGTTTATGCTTGAACAGGAAGAGAATCAGCAAC | 22639 |
| gb:MN985325 | Organism:Severe | GTTTTTAACGCCACCAGATTTGCATCTGTTTATGCTTGAACAGGAAGAGAATCAGCAAC | 22642 |
| gb:MT020881 | Organism:Severe | GTTTTTAACGCCACCAGATTTGCATCTGTTTATGCTTGAACAGGAAGAGAATCAGCAAC | 22642 |
| gb:MT020880 | Organism:Severe | GTTTTTAACGCCACCAGATTTGCATCTGTTTATGCTTGAACAGGAAGAGAATCAGCAAC | 22642 |
| gb:MT066175 | Organism:Severe | GTTTTTAACGCCACCAGATTTGCATCTGTTTATGCTTGAACAGGAAGAGAATCAGCAAC | 22642 |
| gb:MN997409 | Organism:Severe | GTTTTTAACGCCACCAGATTTGCATCTGTTTATGCTTGAACAGGAAGAGAATCAGCAAC | 22642 |
| gb:MN938384 | Organism:Severe | GTTTTTAACGCCACCAGATTTGCATCTGTTTATGCTTGAACAGGAAGAGAATCAGCAAC | 22610 |
| gb:MT044258 | Organism:Severe | GTTTTTAACGCCACCAGATTTGCATCTGTTTATGCTTGAACAGGAAGAGAATCAGCAAC | 22618 |
| gb:MT039890 | Organism:Severe | GTTTTTAACGCCACCAGATTTGCATCTGTTTATGCTTGAACAGGAAGAGAATCAGCAAC | 22642 |
| gb:MN988713 | Organism:Severe | GTTTTTAACGCCACCAGATTTGCATCTGTTTATGCTTGAACAGGAAGAGAATCAGCAAC | 22642 |
| gb:LC521925 | Organism:Severe | GTTTTTAACGCCACCAGATTTGCATCTGTTTATGCTTGAACAGGAAGAGAATCAGCAAC | 22615 |
| gb:MT093571 | Organism:Severe | GTTTTTAACGCCACCAGATTTGCATCTGTTTATGCTTGAACAGGAAGAGAATCAGCAAC | 22642 |
| gb:MT039887 | Organism:Severe | GTTTTTAACGCCACCAGATTTGCATCTGTTTATGCTTGAACAGGAAGAGAATCAGCAAC | 22639 |
| gb:MT019530 | Organism:Severe | GTTTTTAACGCCACCAGATTTGCATCTGTTTATGCTTGAACAGGAAGAGAATCAGCAAC | 22642 |
| gb:MT039888 | Organism:Severe | GTTTTTAACGCCACCAGATTTGCATCTGTTTATGCTTGAACAGGAAGAGAATCAGCAAC | 22642 |
| gb:LC522972 | Organism:Severe | GTTTTTAACGCCACCAGATTTGCATCTGTTTATGCTTGAACAGGAAGAGAATCAGCAAC | 22639 |
| gb:MT027063 | Organism:Severe | GTTTTTAACGCCACCAGATTTGCATCTGTTTATGCTTGAACAGGAAGAGAATCAGCAAC | 22642 |
| gb:MT027062 | Organism:Severe | GTTTTTAACGCCACCAGATTTGCATCTGTTTATGCTTGAACAGGAAGAGAATCAGCAAC | 22642 |
| gb:MT019529 | Organism:Severe | GTTTTTAACGCCACCAGATTTGCATCTGTTTATGCTTGAACAGGAAGAGAATCAGCAAC | 22642 |
| gb:MN996529 | Organism:Severe | GTTTTTAACGCCACCAGATTTGCATCTGTTTATGCTTGAACAGGAAGAGAATCAGCAAC | 22630 |
| gb:MN996531 | Organism:Severe | GTTTTTAACGCCACCAGATTTGCATCTGTTTATGCTTGAACAGGAAGAGAATCAGCAAC | 22629 |
| gb:MT066176 | Organism:Severe | GTTTTTAACGCCACCAGATTTGCATCTGTTTATGCTTGAACAGGAAGAGAATCAGCAAC | 22642 |
| gb:MT027064 | Organism:Severe | GTTTTTAACGCCACCAGATTTGCATCTGTTTATGCTTGAACAGGAAGAGAATCAGCAAC | 22642 |
| gb:MN994468 | Organism:Severe | GTTTTTAACGCCACCAGATTTGCATCTGTTTATGCTTGAACAGGAAGAGAATCAGCAAC | 22642 |
| gb:MT072688 | Organism:Severe | GTTTTTAACGCCACCAGATTTGCATCTGTTTATGCTTGAACAGGAAGAGAATCAGCAAC | 22627 |
| gb:MN996527 | Organism:Severe | GTTTTTAACGCCACCAGATTTGCATCTGTTTATGCTTGAACAGGAAGAGAATCAGCAAC | 22609 |
| gb:MT093631 | Organism:Severe | GTTTTTAACGCCACCAGATTTGCATCTGTTTATGCTTGAACAGGAAGAGAATCAGCAAC | 22680 |
| gb:MT106053 | Organism:Severe | GTTTTTAACGCCACCAGATTTGCATCTGTTTATGCTTGAACAGGAAGAGAATCAGCAAC | 22642 |
| gb:MT019533 | Organism:Severe | GTTTTTAACGCCACCAGATTTGCATCTGTTTATGCTTGAACAGGAAGAGAATCAGCAAC | 22642 |
| gb:MT019531 | Organism:Severe | GTTTTTAACGCCACCAGATTTGCATCTGTTTATGCTTGAACAGGAAGAGAATCAGCAAC | 22642 |
| gb:MN996528 | Organism:Severe | GTTTTTAACGCCACCAGATTTGCATCTGTTTATGCTTGAACAGGAAGAGAATCAGCAAC | 22642 |
| gb:MN996530 | Organism:Severe | GTTTTTAACGCCACCAGATTTGCATCTGTTTATGCTTGAACAGGAAGAGAATCAGCAAC | 22628 |
| gb:MN908947 | Organism:Severe | GTTTTTAACGCCACCAGATTTGCATCTGTTTATGCTTGAACAGGAAGAGAATCAGCAAC | 22642 |
| gb:MT019532 | Organism:Severe | GTTTTTAACGCCACCAGATTTGCATCTGTTTATGCTTGAACAGGAAGAGAATCAGCAAC | 22642 |

\*\*\*\*\*

|             |                 |                                                              |       |
|-------------|-----------------|--------------------------------------------------------------|-------|
| gb:MT020781 | Organism:Severe | TGTGTTGCTGATTATTCTGTCCTATATAAATCCGCATCATTTTCCACTTTTAAAGTGTAT | 22690 |
| gb:MT007544 | Organism:Severe | TGTGTTGCTGATTATTCTGTCCTATATAAATCCGCATCATTTTCCACTTTTAAAGTGTAT | 22702 |
| gb:MN994467 | Organism:Severe | TGTGTTGCTGATTATTCTGTCCTATATAAATCCGCATCATTTTCCACTTTTAAAGTGTAT | 22702 |
| gb:MT044257 | Organism:Severe | TGTGTTGCTGATTATTCTGTCCTATATAAATCCGCATCATTTTCCACTTTTAAAGTGTAT | 22702 |
| gb:MT106054 | Organism:Severe | TGTGTTGCTGATTATTCTGTCCTATATAAATCCGCATCATTTTCCACTTTTAAAGTGTAT | 22702 |
| gb:MT049951 | Organism:Severe | TGTGTTGCTGATTATTCTGTCCTATATAAATCCGCATCATTTTCCACTTTTAAAGTGTAT | 22702 |
| gb:MN975262 | Organism:Severe | TGTGTTGCTGATTATTCTGTCCTATATAAATCCGCATCATTTTCCACTTTTAAAGTGTAT | 22702 |
| gb:MT106052 | Organism:Severe | TGTGTTGCTGATTATTCTGTCCTATATAAATCCGCATCATTTTCCACTTTTAAAGTGTAT | 22702 |
| gb:LC522975 | Organism:Severe | TGTGTTGCTGATTATTCTGTCCTATATAAATCCGCATCATTTTCCACTTTTAAAGTGTAT | 22699 |
| gb:LC522973 | Organism:Severe | TGTGTTGCTGATTATTCTGTCCTATATAAATCCGCATCATTTTCCACTTTTAAAGTGTAT | 22699 |
| gb:LC522974 | Organism:Severe | TGTGTTGCTGATTATTCTGTCCTATATAAATCCGCATCATTTTCCACTTTTAAAGTGTAT | 22699 |
| gb:MN985325 | Organism:Severe | TGTGTTGCTGATTATTCTGTCCTATATAAATCCGCATCATTTTCCACTTTTAAAGTGTAT | 22702 |
| gb:MT020881 | Organism:Severe | TGTGTTGCTGATTATTCTGTCCTATATAAATCCGCATCATTTTCCACTTTTAAAGTGTAT | 22702 |
| gb:MT020880 | Organism:Severe | TGTGTTGCTGATTATTCTGTCCTATATAAATCCGCATCATTTTCCACTTTTAAAGTGTAT | 22702 |
| gb:MT066175 | Organism:Severe | TGTGTTGCTGATTATTCTGTCCTATATAAATCCGCATCATTTTCCACTTTTAAAGTGTAT | 22702 |
| gb:MN997409 | Organism:Severe | TGTGTTGCTGATTATTCTGTCCTATATAAATCCGCATCATTTTCCACTTTTAAAGTGTAT | 22702 |
| gb:MN938384 | Organism:Severe | TGTGTTGCTGATTATTCTGTCCTATATAAATCCGCATCATTTTCCACTTTTAAAGTGTAT | 22670 |
| gb:MT044258 | Organism:Severe | TGTGTTGCTGATTATTCTGTCCTATATAAATCCGCATCATTTTCCACTTTTAAAGTGTAT | 22678 |
| gb:MT039890 | Organism:Severe | TGTGTTGCTGATTATTCTGTCCTATATAAATCCGCATCATTTTCCACTTTTAAAGTGTAT | 22702 |
| gb:MN988713 | Organism:Severe | TGTGTTGCTGATTATTCTGTCCTATATAAATCCGCATCATTTTCCACTTTTAAAGTGTAT | 22702 |
| gb:LC521925 | Organism:Severe | TGTGTTGCTGATTATTCTGTCCTATATAAATCCGCATCATTTTCCACTTTTAAAGTGTAT | 22675 |
| gb:MT093571 | Organism:Severe | TGTGTTGCTGATTATTCTGTCCTATATAAATCCGCATCATTTTCCACTTTTAAAGTGTAT | 22702 |
| gb:MT039887 | Organism:Severe | TGTGTTGCTGATTATTCTGTCCTATATAAATCCGCATCATTTTCCACTTTTAAAGTGTAT | 22699 |
| gb:MT019530 | Organism:Severe | TGTGTTGCTGATTATTCTGTCCTATATAAATCCGCATCATTTTCCACTTTTAAAGTGTAT | 22702 |
| gb:MT039888 | Organism:Severe | TGTGTTGCTGATTATTCTGTCCTATATAAATCCGCATCATTTTCCACTTTTAAAGTGTAT | 22702 |
| gb:LC522972 | Organism:Severe | TGTGTTGCTGATTATTCTGTCCTATATAAATCCGCATCATTTTCCACTTTTAAAGTGTAT | 22699 |
| gb:MT027063 | Organism:Severe | TGTGTTGCTGATTATTCTGTCCTATATAAATCCGCATCATTTTCCACTTTTAAAGTGTAT | 22702 |
| gb:MT027062 | Organism:Severe | TGTGTTGCTGATTATTCTGTCCTATATAAATCCGCATCATTTTCCACTTTTAAAGTGTAT | 22702 |

|             |                 |                                                             |       |
|-------------|-----------------|-------------------------------------------------------------|-------|
| gb:MT019529 | Organism:Severe | TGTGTTGCTGATTATTCTGTCCTATATAAATCCGCATCATTTTCCACTTTTAAGTGTAT | 22702 |
| gb:MN996529 | Organism:Severe | TGTGTTGCTGATTATTCTGTCCTATATAAATCCGCATCATTTTCCACTTTTAAGTGTAT | 22690 |
| gb:MN996531 | Organism:Severe | TGTGTTGCTGATTATTCTGTCCTATATAAATCCGCATCATTTTCCACTTTTAAGTGTAT | 22689 |
| gb:MT066176 | Organism:Severe | TGTGTTGCTGATTATTCTGTCCTATATAAATCCGCATCATTTTCCACTTTTAAGTGTAT | 22702 |
| gb:MT027064 | Organism:Severe | TGTGTTGCTGATTATTCTGTCCTATATAAATCCGCATCATTTTCCACTTTTAAGTGTAT | 22702 |
| gb:MN994468 | Organism:Severe | TGTGTTGCTGATTATTCTGTCCTATATAAATCCGCATCATTTTCCACTTTTAAGTGTAT | 22702 |
| gb:MT072688 | Organism:Severe | TGTGTTGCTGATTATTCTGTCCTATATAAATCCGCATCATTTTCCACTTTTAAGTGTAT | 22687 |
| gb:MN996527 | Organism:Severe | TGTGTTGCTGATTATTCTGTCCTATATAAATCCGCATCATTTTCCACTTTTAAGTGTAT | 22669 |
| gb:MT093631 | Organism:Severe | TGTGTTGCTGATTATTCTGTCCTATATAAATCCGCATCATTTTCCACTTTTAAGTGTAT | 22740 |
| gb:MT106053 | Organism:Severe | TGTGTTGCTGATTATTCTGTCCTATATAAATCCGCATCATTTTCCACTTTTAAGTGTAT | 22702 |
| gb:MT019533 | Organism:Severe | TGTGTTGCTGATTATTCTGTCCTATATAAATCCGCATCATTTTCCACTTTTAAGTGTAT | 22702 |
| gb:MT019531 | Organism:Severe | TGTGTTGCTGATTATTCTGTCCTATATAAATCCGCATCATTTTCCACTTTTAAGTGTAT | 22702 |
| gb:MN996528 | Organism:Severe | TGTGTTGCTGATTATTCTGTCCTATATAAATCCGCATCATTTTCCACTTTTAAGTGTAT | 22702 |
| gb:MN996530 | Organism:Severe | TGTGTTGCTGATTATTCTGTCCTATATAAATCCGCATCATTTTCCACTTTTAAGTGTAT | 22688 |
| gb:MN908947 | Organism:Severe | TGTGTTGCTGATTATTCTGTCCTATATAAATCCGCATCATTTTCCACTTTTAAGTGTAT | 22702 |
| gb:MT019532 | Organism:Severe | TGTGTTGCTGATTATTCTGTCCTATATAAATCCGCATCATTTTCCACTTTTAAGTGTAT | 22702 |

\*\*\*\*\*

|             |                 |                                                            |       |
|-------------|-----------------|------------------------------------------------------------|-------|
| gb:MT020781 | Organism:Severe | GGAGTGTCTCCTACTAAATTAATGATCTCTGCTTTACTAATGTCTATGCAGATTCATT | 22750 |
| gb:MT007544 | Organism:Severe | GGAGTGTCTCCTACTAAATTAATGATCTCTGCTTTACTAATGTCTATGCAGATTCATT | 22762 |
| gb:MN994467 | Organism:Severe | GGAGTGTCTCCTACTAAATTAATGATCTCTGCTTTACTAATGTCTATGCAGATTCATT | 22762 |
| gb:MT044257 | Organism:Severe | GGAGTGTCTCCTACTAAATTAATGATCTCTGCTTTACTAATGTCTATGCAGATTCATT | 22762 |
| gb:MT106054 | Organism:Severe | GGAGTGTCTCCTACTAAATTAATGATCTCTGCTTTACTAATGTCTATGCAGATTCATT | 22762 |
| gb:MT049951 | Organism:Severe | GGAGTGTCTCCTACTAAATTAATGATCTCTGCTTTACTAATGTCTATGCAGATTCATT | 22762 |
| gb:MN975262 | Organism:Severe | GGAGTGTCTCCTACTAAATTAATGATCTCTGCTTTACTAATGTCTATGCAGATTCATT | 22762 |
| gb:MT106052 | Organism:Severe | GGAGTGTCTCCTACTAAATTAATGATCTCTGCTTTACTAATGTCTATGCAGATTCATT | 22762 |
| gb:LC522975 | Organism:Severe | GGAGTGTCTCCTACTAAATTAATGATCTCTGCTTTACTAATGTCTATGCAGATTCATT | 22759 |
| gb:LC522973 | Organism:Severe | GGAGTGTCTCCTACTAAATTAATGATCTCTGCTTTACTAATGTCTATGCAGATTCATT | 22759 |
| gb:LC522974 | Organism:Severe | GGAGTGTCTCCTACTAAATTAATGATCTCTGCTTTACTAATGTCTATGCAGATTCATT | 22759 |
| gb:MN985325 | Organism:Severe | GGAGTGTCTCCTACTAAATTAATGATCTCTGCTTTACTAATGTCTATGCAGATTCATT | 22762 |
| gb:MT020881 | Organism:Severe | GGAGTGTCTCCTACTAAATTAATGATCTCTGCTTTACTAATGTCTATGCAGATTCATT | 22762 |
| gb:MT020880 | Organism:Severe | GGAGTGTCTCCTACTAAATTAATGATCTCTGCTTTACTAATGTCTATGCAGATTCATT | 22762 |
| gb:MT066175 | Organism:Severe | GGAGTGTCTCCTACTAAATTAATGATCTCTGCTTTACTAATGTCTATGCAGATTCATT | 22762 |
| gb:MN997409 | Organism:Severe | GGAGTGTCTCCTACTAAATTAATGATCTCTGCTTTACTAATGTCTATGCAGATTCATT | 22762 |
| gb:MN938384 | Organism:Severe | GGAGTGTCTCCTACTAAATTAATGATCTCTGCTTTACTAATGTCTATGCAGATTCATT | 22730 |
| gb:MT044258 | Organism:Severe | GGAGTGTCTCCTACTAAATTAATGATCTCTGCTTTACTAATGTCTATGCAGATTCATT | 22738 |
| gb:MT039890 | Organism:Severe | GGAGTGTCTCCTACTAAATTAATGATCTCTGCTTTACTAATGTCTATGCAGATTCATT | 22762 |
| gb:MN988713 | Organism:Severe | GGAGTGTCTCCTACTAAATTAATGATCTCTGCTTTACTAATGTCTATGCAGATTCATT | 22762 |
| gb:LC521925 | Organism:Severe | GGAGTGTCTCCTACTAAATTAATGATCTCTGCTTTACTAATGTCTATGCAGATTCATT | 22735 |
| gb:MT093571 | Organism:Severe | GGAGTGTCTCCTACTAAATTAATGATCTCTGCTTTACTAATGTCTATGCAGATTCATT | 22762 |
| gb:MT039887 | Organism:Severe | GGAGTGTCTCCTACTAAATTAATGATCTCTGCTTTACTAATGTCTATGCAGATTCATT | 22759 |
| gb:MT019530 | Organism:Severe | GGAGTGTCTCCTACTAAATTAATGATCTCTGCTTTACTAATGTCTATGCAGATTCATT | 22762 |
| gb:MT039888 | Organism:Severe | GGAGTGTCTCCTACTAAATTAATGATCTCTGCTTTACTAATGTCTATGCAGATTCATT | 22762 |
| gb:LC522972 | Organism:Severe | GGAGTGTCTCCTACTAAATTAATGATCTCTGCTTTACTAATGTCTATGCAGATTCATT | 22759 |
| gb:MT027063 | Organism:Severe | GGAGTGTCTCCTACTAAATTAATGATCTCTGCTTTACTAATGTCTATGCAGATTCATT | 22762 |
| gb:MT027062 | Organism:Severe | GGAGTGTCTCCTACTAAATTAATGATCTCTGCTTTACTAATGTCTATGCAGATTCATT | 22762 |
| gb:MT019529 | Organism:Severe | GGAGTGTCTCCTACTAAATTAATGATCTCTGCTTTACTAATGTCTATGCAGATTCATT | 22762 |
| gb:MN996529 | Organism:Severe | GGAGTGTCTCCTACTAAATTAATGATCTCTGCTTTACTAATGTCTATGCAGATTCATT | 22750 |
| gb:MN996531 | Organism:Severe | GGAGTGTCTCCTACTAAATTAATGATCTCTGCTTTACTAATGTCTATGCAGATTCATT | 22749 |
| gb:MT066176 | Organism:Severe | GGAGTGTCTCCTACTAAATTAATGATCTCTGCTTTACTAATGTCTATGCAGATTCATT | 22762 |
| gb:MT027064 | Organism:Severe | GGAGTGTCTCCTACTAAATTAATGATCTCTGCTTTACTAATGTCTATGCAGATTCATT | 22762 |
| gb:MN994468 | Organism:Severe | GGAGTGTCTCCTACTAAATTAATGATCTCTGCTTTACTAATGTCTATGCAGATTCATT | 22762 |
| gb:MT072688 | Organism:Severe | GGAGTGTCTCCTACTAAATTAATGATCTCTGCTTTACTAATGTCTATGCAGATTCATT | 22747 |
| gb:MN996527 | Organism:Severe | GGAGTGTCTCCTACTAAATTAATGATCTCTGCTTTACTAATGTCTATGCAGATTCATT | 22729 |
| gb:MT093631 | Organism:Severe | GGAGTGTCTCCTACTAAATTAATGATCTCTGCTTTACTAATGTCTATGCAGATTCATT | 22800 |
| gb:MT106053 | Organism:Severe | GGAGTGTCTCCTACTAAATTAATGATCTCTGCTTTACTAATGTCTATGCAGATTCATT | 22762 |
| gb:MT019533 | Organism:Severe | GGAGTGTCTCCTACTAAATTAATGATCTCTGCTTTACTAATGTCTATGCAGATTCATT | 22762 |
| gb:MT019531 | Organism:Severe | GGAGTGTCTCCTACTAAATTAATGATCTCTGCTTTACTAATGTCTATGCAGATTCATT | 22762 |
| gb:MN996528 | Organism:Severe | GGAGTGTCTCCTACTAAATTAATGATCTCTGCTTTACTAATGTCTATGCAGATTCATT | 22762 |
| gb:MN996530 | Organism:Severe | GGAGTGTCTCCTACTAAATTAATGATCTCTGCTTTACTAATGTCTATGCAGATTCATT | 22748 |
| gb:MN908947 | Organism:Severe | GGAGTGTCTCCTACTAAATTAATGATCTCTGCTTTACTAATGTCTATGCAGATTCATT | 22762 |
| gb:MT019532 | Organism:Severe | GGAGTGTCTCCTACTAAATTAATGATCTCTGCTTTACTAATGTCTATGCAGATTCATT | 22762 |

\*\*\*\*\*

|             |                 |                                                             |       |
|-------------|-----------------|-------------------------------------------------------------|-------|
| gb:MT020781 | Organism:Severe | GTAATTAGAGGTGATGAAGTCAGACAAATCGCTCCAGGGCAAACGGAAAGATTGCTGAT | 22810 |
|-------------|-----------------|-------------------------------------------------------------|-------|

|             |                 |                                                              |       |
|-------------|-----------------|--------------------------------------------------------------|-------|
| gb:MT007544 | Organism:Severe | GTAATTAGAGGTGATGAAGTCAGACAAATCGCTCCAGGGCAAAC TGAAAGATTGCTGAT | 22822 |
| gb:MN994467 | Organism:Severe | GTAATTAGAGGTGATGAAGTCAGACAAATCGCTCCAGGGCAAAC TGAAAGATTGCTGAT | 22822 |
| gb:MT044257 | Organism:Severe | GTAATTAGAGGTGATGAAGTCAGACAAATCGCTCCAGGGCAAAC TGAAAGATTGCTGAT | 22822 |
| gb:MT106054 | Organism:Severe | GTAATTAGAGGTGATGAAGTCAGACAAATCGCTCCAGGGCAAAC TGAAAGATTGCTGAT | 22822 |
| gb:MT049951 | Organism:Severe | GTAATTAGAGGTGATGAAGTCAGACAAATCGCTCCAGGGCAAAC TGAAAGATTGCTGAT | 22822 |
| gb:MN975262 | Organism:Severe | GTAATTAGAGGTGATGAAGTCAGACAAATCGCTCCAGGGCAAAC TGAAAGATTGCTGAT | 22822 |
| gb:MT106052 | Organism:Severe | GTAATTAGAGGTGATGAAGTCAGACAAATCGCTCCAGGGCAAAC TGAAAGATTGCTGAT | 22822 |
| gb:LC522975 | Organism:Severe | GTAATTAGAGGTGATGAAGTCAGACAAATCGCTCCAGGGCAAAC TGAAAGATTGCTGAT | 22819 |
| gb:LC522973 | Organism:Severe | GTAATTAGAGGTGATGAAGTCAGACAAATCGCTCCAGGGCAAAC TGAAAGATTGCTGAT | 22819 |
| gb:LC522974 | Organism:Severe | GTAATTAGAGGTGATGAAGTCAGACAAATCGCTCCAGGGCAAAC TGAAAGATTGCTGAT | 22819 |
| gb:MN985325 | Organism:Severe | GTAATTAGAGGTGATGAAGTCAGACAAATCGCTCCAGGGCAAAC TGAAAGATTGCTGAT | 22822 |
| gb:MT020881 | Organism:Severe | GTAATTAGAGGTGATGAAGTCAGACAAATCGCTCCAGGGCAAAC TGAAAGATTGCTGAT | 22822 |
| gb:MT020880 | Organism:Severe | GTAATTAGAGGTGATGAAGTCAGACAAATCGCTCCAGGGCAAAC TGAAAGATTGCTGAT | 22822 |
| gb:MT066175 | Organism:Severe | GTAATTAGAGGTGATGAAGTCAGACAAATCGCTCCAGGGCAAAC TGAAAGATTGCTGAT | 22822 |
| gb:MN997409 | Organism:Severe | GTAATTAGAGGTGATGAAGTCAGACAAATCGCTCCAGGGCAAAC TGAAAGATTGCTGAT | 22822 |
| gb:MN938384 | Organism:Severe | GTAATTAGAGGTGATGAAGTCAGACAAATCGCTCCAGGGCAAAC TGAAAGATTGCTGAT | 22790 |
| gb:MT044258 | Organism:Severe | GTAATTAGAGGTGATGAAGTCAGACAAATCGCTCCAGGGCAAAC TGAAAGATTGCTGAT | 22798 |
| gb:MT039890 | Organism:Severe | GTAATTAGAGGTGATGAAGTCAGACAAATCGCTCCAGGGCAAAC TGAAAGATTGCTGAT | 22822 |
| gb:MN988713 | Organism:Severe | GTAATTAGAGGTGATGAAGTCAGACAAATCGCTCCAGGGCAAAC TGAAAGATTGCTGAT | 22822 |
| gb:LC521925 | Organism:Severe | GTAATTAGAGGTGATGAAGTCAGACAAATCGCTCCAGGGCAAAC TGAAAGATTGCTGAT | 22795 |
| gb:MT093571 | Organism:Severe | GTAATTAGAGGTGATGAAGTCAGACAAATCGCTCCAGGGCAAAC TGAAAGATTGCTGAT | 22822 |
| gb:MT039887 | Organism:Severe | GTAATTAGAGGTGATGAAGTCAGACAAATCGCTCCAGGGCAAAC TGAAAGATTGCTGAT | 22819 |
| gb:MT019530 | Organism:Severe | GTAATTAGAGGTGATGAAGTCAGACAAATCGCTCCAGGGCAAAC TGAAAGATTGCTGAT | 22822 |
| gb:MT039888 | Organism:Severe | GTAATTAGAGGTGATGAAGTCAGACAAATCGCTCCAGGGCAAAC TGAAAGATTGCTGAT | 22822 |
| gb:LC522972 | Organism:Severe | GTAATTAGAGGTGATGAAGTCAGACAAATCGCTCCAGGGCAAAC TGAAAGATTGCTGAT | 22819 |
| gb:MT027063 | Organism:Severe | GTAATTAGAGGTGATGAAGTCAGACAAATCGCTCCAGGGCAAAC TGAAAGATTGCTGAT | 22822 |
| gb:MT027062 | Organism:Severe | GTAATTAGAGGTGATGAAGTCAGACAAATCGCTCCAGGGCAAAC TGAAAGATTGCTGAT | 22822 |
| gb:MT019529 | Organism:Severe | GTAATTAGAGGTGATGAAGTCAGACAAATCGCTCCAGGGCAAAC TGAAAGATTGCTGAT | 22822 |
| gb:MN996529 | Organism:Severe | GTAATTAGAGGTGATGAAGTCAGACAAATCGCTCCAGGGCAAAC TGAAAGATTGCTGAT | 22810 |
| gb:MN996531 | Organism:Severe | GTAATTAGAGGTGATGAAGTCAGACAAATCGCTCCAGGGCAAAC TGAAAGATTGCTGAT | 22809 |
| gb:MT066176 | Organism:Severe | GTAATTAGAGGTGATGAAGTCAGACAAATCGCTCCAGGGCAAAC TGAAAGATTGCTGAT | 22822 |
| gb:MT027064 | Organism:Severe | GTAATTAGAGGTGATGAAGTCAGACAAATCGCTCCAGGGCAAAC TGAAAGATTGCTGAT | 22822 |
| gb:MN994468 | Organism:Severe | GTAATTAGAGGTGATGAAGTCAGACAAATCGCTCCAGGGCAAAC TGAAAGATTGCTGAT | 22822 |
| gb:MT072688 | Organism:Severe | GTAATTAGAGGTGATGAAGTCAGACAAATCGCTCCAGGGCAAAC TGAAAGATTGCTGAT | 22807 |
| gb:MN996527 | Organism:Severe | GTAATTAGAGGTGATGAAGTCAGACAAATCGCTCCAGGGCAAAC TGAAAGATTGCTGAT | 22789 |
| gb:MT093631 | Organism:Severe | GTAATTAGAGGTGATGAAGTCAGACAAATCGCTCCAGGGCAAAC TGAAAGATTGCTGAT | 22860 |
| gb:MT106053 | Organism:Severe | GTAATTAGAGGTGATGAAGTCAGACAAATCGCTCCAGGGCAAAC TGAAAGATTGCTGAT | 22822 |
| gb:MT019533 | Organism:Severe | GTAATTAGAGGTGATGAAGTCAGACAAATCGCTCCAGGGCAAAC TGAAAGATTGCTGAT | 22822 |
| gb:MT019531 | Organism:Severe | GTAATTAGAGGTGATGAAGTCAGACAAATCGCTCCAGGGCAAAC TGAAAGATTGCTGAT | 22822 |
| gb:MN996528 | Organism:Severe | GTAATTAGAGGTGATGAAGTCAGACAAATCGCTCCAGGGCAAAC TGAAAGATTGCTGAT | 22822 |
| gb:MN996530 | Organism:Severe | GTAATTAGAGGTGATGAAGTCAGACAAATCGCTCCAGGGCAAAC TGAAAGATTGCTGAT | 22808 |
| gb:MN908947 | Organism:Severe | GTAATTAGAGGTGATGAAGTCAGACAAATCGCTCCAGGGCAAAC TGAAAGATTGCTGAT | 22822 |
| gb:MT019532 | Organism:Severe | GTAATTAGAGGTGATGAAGTCAGACAAATCGCTCCAGGGCAAAC TGAAAGATTGCTGAT | 22822 |

\*\*\*\*\*

|             |                 |                                                            |       |
|-------------|-----------------|------------------------------------------------------------|-------|
| gb:MT020781 | Organism:Severe | TATAATTATAAATTACCAGATGATTTTACAGGCTGCGTTATAGCTTGAATTCTAACAA | 22870 |
| gb:MT007544 | Organism:Severe | TATAATTATAAATTACCAGATGATTTTACAGGCTGCGTTATAGCTTGAATTCTAACAA | 22882 |
| gb:MN994467 | Organism:Severe | TATAATTATAAATTACCAGATGATTTTACAGGCTGCGTTATAGCTTGAATTCTAACAA | 22882 |
| gb:MT044257 | Organism:Severe | TATAATTATAAATTACCAGATGATTTTACAGGCTGCGTTATAGCTTGAATTCTAACAA | 22882 |
| gb:MT106054 | Organism:Severe | TATAATTATAAATTACCAGATGATTTTACAGGCTGCGTTATAGCTTGAATTCTAACAA | 22882 |
| gb:MT049951 | Organism:Severe | TATAATTATAAATTACCAGATGATTTTACAGGCTGCGTTATAGCTTGAATTCTAACAA | 22882 |
| gb:MN975262 | Organism:Severe | TATAATTATAAATTACCAGATGATTTTACAGGCTGCGTTATAGCTTGAATTCTAACAA | 22882 |
| gb:MT106052 | Organism:Severe | TATAATTATAAATTACCAGATGATTTTACAGGCTGCGTTATAGCTTGAATTCTAACAA | 22882 |
| gb:LC522975 | Organism:Severe | TATAATTATAAATTACCAGATGATTTTACAGGCTGCGTTATAGCTTGAATTCTAACAA | 22879 |
| gb:LC522973 | Organism:Severe | TATAATTATAAATTACCAGATGATTTTACAGGCTGCGTTATAGCTTGAATTCTAACAA | 22879 |
| gb:LC522974 | Organism:Severe | TATAATTATAAATTACCAGATGATTTTACAGGCTGCGTTATAGCTTGAATTCTAACAA | 22879 |
| gb:MN985325 | Organism:Severe | TATAATTATAAATTACCAGATGATTTTACAGGCTGCGTTATAGCTTGAATTCTAACAA | 22882 |
| gb:MT020881 | Organism:Severe | TATAATTATAAATTACCAGATGATTTTACAGGCTGCGTTATAGCTTGAATTCTAACAA | 22882 |
| gb:MT020880 | Organism:Severe | TATAATTATAAATTACCAGATGATTTTACAGGCTGCGTTATAGCTTGAATTCTAACAA | 22882 |
| gb:MT066175 | Organism:Severe | TATAATTATAAATTACCAGATGATTTTACAGGCTGCGTTATAGCTTGAATTCTAACAA | 22882 |
| gb:MN997409 | Organism:Severe | TATAATTATAAATTACCAGATGATTTTACAGGCTGCGTTATAGCTTGAATTCTAACAA | 22882 |
| gb:MN938384 | Organism:Severe | TATAATTATAAATTACCAGATGATTTTACAGGCTGCGTTATAGCTTGAATTCTAACAA | 22850 |
| gb:MT044258 | Organism:Severe | TATAATTATAAATTACCAGATGATTTTACAGGCTGCGTTATAGCTTGAATTCTAACAA | 22858 |
| gb:MT039890 | Organism:Severe | TATAATTATAAATTACCAGATGATTTTACAGGCTGCGTTATAGCTTGAATTCTAACAA | 22882 |
| gb:MN988713 | Organism:Severe | TATAATTATAAATTACCAGATGATTTTACAGGCTGCGTTATAGCTTGAATTCTAACAA | 22882 |

|             |                 |                                                             |       |
|-------------|-----------------|-------------------------------------------------------------|-------|
| gb:LC521925 | Organism:Severe | TATAATTATAAATTACCAGATGATTTTACAGGCTGCGTTATAGCTTGAATTCTAACAAT | 22855 |
| gb:MT093571 | Organism:Severe | TATAATTATAAATTACCAGATGATTTTACAGGCTGCGTTATAGCTTGAATTCTAACAAT | 22882 |
| gb:MT039887 | Organism:Severe | TATAATTATAAATTACCAGATGATTTTACAGGCTGCGTTATAGCTTGAATTCTAACAAT | 22879 |
| gb:MT019530 | Organism:Severe | TATAATTATAAATTACCAGATGATTTTACAGGCTGCGTTATAGCTTGAATTCTAACAAT | 22882 |
| gb:MT039888 | Organism:Severe | TATAATTATAAATTACCAGATGATTTTACAGGCTGCGTTATAGCTTGAATTCTAACAAT | 22882 |
| gb:LC522972 | Organism:Severe | TATAATTATAAATTACCAGATGATTTTACAGGCTGCGTTATAGCTTGAATTCTAACAAT | 22879 |
| gb:MT027063 | Organism:Severe | TATAATTATAAATTACCAGATGATTTTACAGGCTGCGTTATAGCTTGAATTCTAACAAT | 22882 |
| gb:MT027062 | Organism:Severe | TATAATTATAAATTACCAGATGATTTTACAGGCTGCGTTATAGCTTGAATTCTAACAAT | 22882 |
| gb:MT019529 | Organism:Severe | TATAATTATAAATTACCAGATGATTTTACAGGCTGCGTTATAGCTTGAATTCTAACAAT | 22882 |
| gb:MN996529 | Organism:Severe | TATAATTATAAATTACCAGATGATTTTACAGGCTGCGTTATAGCTTGAATTCTAACAAT | 22870 |
| gb:MN996531 | Organism:Severe | TATAATTATAAATTACCAGATGATTTTACAGGCTGCGTTATAGCTTGAATTCTAACAAT | 22869 |
| gb:MT066176 | Organism:Severe | TATAATTATAAATTACCAGATGATTTTACAGGCTGCGTTATAGCTTGAATTCTAACAAT | 22882 |
| gb:MT027064 | Organism:Severe | TATAATTATAAATTACCAGATGATTTTACAGGCTGCGTTATAGCTTGAATTCTAACAAT | 22882 |
| gb:MN994468 | Organism:Severe | TATAATTATAAATTACCAGATGATTTTACAGGCTGCGTTATAGCTTGAATTCTAACAAT | 22882 |
| gb:MT072688 | Organism:Severe | TATAATTATAAATTACCAGATGATTTTACAGGCTGCGTTATAGCTTGAATTCTAACAAT | 22867 |
| gb:MN996527 | Organism:Severe | TATAATTATAAATTACCAGATGATTTTACAGGCTGCGTTATAGCTTGAATTCTAACAAT | 22849 |
| gb:MT093631 | Organism:Severe | TATAATTATAAATTACCAGATGATTTTACAGGCTGCGTTATAGCTTGAATTCTAACAAT | 22920 |
| gb:MT106053 | Organism:Severe | TATAATTATAAATTACCAGATGATTTTACAGGCTGCGTTATAGCTTGAATTCTAACAAT | 22882 |
| gb:MT019533 | Organism:Severe | TATAATTATAAATTACCAGATGATTTTACAGGCTGCGTTATAGCTTGAATTCTAACAAT | 22882 |
| gb:MT019531 | Organism:Severe | TATAATTATAAATTACCAGATGATTTTACAGGCTGCGTTATAGCTTGAATTCTAACAAT | 22882 |
| gb:MN996528 | Organism:Severe | TATAATTATAAATTACCAGATGATTTTACAGGCTGCGTTATAGCTTGAATTCTAACAAT | 22882 |
| gb:MN996530 | Organism:Severe | TATAATTATAAATTACCAGATGATTTTACAGGCTGCGTTATAGCTTGAATTCTAACAAT | 22868 |
| gb:MN908947 | Organism:Severe | TATAATTATAAATTACCAGATGATTTTACAGGCTGCGTTATAGCTTGAATTCTAACAAT | 22882 |
| gb:MT019532 | Organism:Severe | TATAATTATAAATTACCAGATGATTTTACAGGCTGCGTTATAGCTTGAATTCTAACAAT | 22882 |

\*\*\*\*\*

|             |                 |                                                              |       |
|-------------|-----------------|--------------------------------------------------------------|-------|
| gb:MT020781 | Organism:Severe | CTTGATTCTAAGGTTGGTGGTAATTATAATTACCTGTATAGATTGTTTAGGAAGTCTAAT | 22930 |
| gb:MT007544 | Organism:Severe | CTTGATTCTAAGGTTGGTGGTAATTATAATTACCTGTATAGATTGTTTAGGAAGTCTAAT | 22942 |
| gb:MN994467 | Organism:Severe | CTTGATTCTAAGGTTGGTGGTAATTATAATTACCTGTATAGATTGTTTAGGAAGTCTAAT | 22942 |
| gb:MT044257 | Organism:Severe | CTTGATTCTAAGGTTGGTGGTAATTATAATTACCTGTATAGATTGTTTAGGAAGTCTAAT | 22942 |
| gb:MT106054 | Organism:Severe | CTTGATTCTAAGGTTGGTGGTAATTATAATTACCTGTATAGATTGTTTAGGAAGTCTAAT | 22942 |
| gb:MT049951 | Organism:Severe | CTTGATTCTAAGGTTGGTGGTAATTATAATTACCTGTATAGATTGTTTAGGAAGTCTAAT | 22942 |
| gb:MN975262 | Organism:Severe | CTTGATTCTAAGGTTGGTGGTAATTATAATTACCTGTATAGATTGTTTAGGAAGTCTAAT | 22942 |
| gb:MT106052 | Organism:Severe | CTTGATTCTAAGGTTGGTGGTAATTATAATTACCTGTATAGATTGTTTAGGAAGTCTAAT | 22942 |
| gb:LC522975 | Organism:Severe | CTTGATTCTAAGGTTGGTGGTAATTATAATTACCTGTATAGATTGTTTAGGAAGTCTAAT | 22939 |
| gb:LC522973 | Organism:Severe | CTTGATTCTAAGGTTGGTGGTAATTATAATTACCTGTATAGATTGTTTAGGAAGTCTAAT | 22939 |
| gb:LC522974 | Organism:Severe | CTTGATTCTAAGGTTGGTGGTAATTATAATTACCTGTATAGATTGTTTAGGAAGTCTAAT | 22939 |
| gb:MN985325 | Organism:Severe | CTTGATTCTAAGGTTGGTGGTAATTATAATTACCTGTATAGATTGTTTAGGAAGTCTAAT | 22942 |
| gb:MT020881 | Organism:Severe | CTTGATTCTAAGGTTGGTGGTAATTATAATTACCTGTATAGATTGTTTAGGAAGTCTAAT | 22942 |
| gb:MT020880 | Organism:Severe | CTTGATTCTAAGGTTGGTGGTAATTATAATTACCTGTATAGATTGTTTAGGAAGTCTAAT | 22942 |
| gb:MT066175 | Organism:Severe | CTTGATTCTAAGGTTGGTGGTAATTATAATTACCTGTATAGATTGTTTAGGAAGTCTAAT | 22942 |
| gb:MN997409 | Organism:Severe | CTTGATTCTAAGGTTGGTGGTAATTATAATTACCTGTATAGATTGTTTAGGAAGTCTAAT | 22942 |
| gb:MN938384 | Organism:Severe | CTTGATTCTAAGGTTGGTGGTAATTATAATTACCTGTATAGATTGTTTAGGAAGTCTAAT | 22910 |
| gb:MT044258 | Organism:Severe | CTTGATTCTAAGGTTGGTGGTAATTATAATTACCTGTATAGATTGTTTAGGAAGTCTAAT | 22918 |
| gb:MT039890 | Organism:Severe | CTTGATTCTAAGGTTGGTGGTAATTATAATTACCTGTATAGATTGTTTAGGAAGTCTAAT | 22942 |
| gb:MN988713 | Organism:Severe | CTTGATTCTAAGGTTGGTGGTAATTATAATTACCTGTATAGATTGTTTAGGAAGTCTAAT | 22942 |
| gb:LC521925 | Organism:Severe | CTTGATTCTAAGGTTGGTGGTAATTATAATTACCTGTATAGATTGTTTAGGAAGTCTAAT | 22915 |
| gb:MT093571 | Organism:Severe | CTTGATTCTAAGGTTGGTGGTAATTATAATTACCTGTATAGATTGTTTAGGAAGTCTAAT | 22942 |
| gb:MT039887 | Organism:Severe | CTTGATTCTAAGGTTGGTGGTAATTATAATTACCTGTATAGATTGTTTAGGAAGTCTAAT | 22939 |
| gb:MT019530 | Organism:Severe | CTTGATTCTAAGGTTGGTGGTAATTATAATTACCTGTATAGATTGTTTAGGAAGTCTAAT | 22942 |
| gb:MT039888 | Organism:Severe | CTTGATTCTAAGGTTGGTGGTAATTATAATTACCTGTATAGATTGTTTAGGAAGTCTAAT | 22942 |
| gb:LC522972 | Organism:Severe | CTTGATTCTAAGGTTGGTGGTAATTATAATTACCTGTATAGATTGTTTAGGAAGTCTAAT | 22939 |
| gb:MT027063 | Organism:Severe | CTTGATTCTAAGGTTGGTGGTAATTATAATTACCTGTATAGATTGTTTAGGAAGTCTAAT | 22942 |
| gb:MT027062 | Organism:Severe | CTTGATTCTAAGGTTGGTGGTAATTATAATTACCTGTATAGATTGTTTAGGAAGTCTAAT | 22942 |
| gb:MT019529 | Organism:Severe | CTTGATTCTAAGGTTGGTGGTAATTATAATTACCTGTATAGATTGTTTAGGAAGTCTAAT | 22942 |
| gb:MN996529 | Organism:Severe | CTTGATTCTAAGGTTGGTGGTAATTATAATTACCTGTATAGATTGTTTAGGAAGTCTAAT | 22930 |
| gb:MN996531 | Organism:Severe | CTTGATTCTAAGGTTGGTGGTAATTATAATTACCTGTATAGATTGTTTAGGAAGTCTAAT | 22929 |
| gb:MT066176 | Organism:Severe | CTTGATTCTAAGGTTGGTGGTAATTATAATTACCTGTATAGATTGTTTAGGAAGTCTAAT | 22942 |
| gb:MT027064 | Organism:Severe | CTTGATTCTAAGGTTGGTGGTAATTATAATTACCTGTATAGATTGTTTAGGAAGTCTAAT | 22942 |
| gb:MN994468 | Organism:Severe | CTTGATTCTAAGGTTGGTGGTAATTATAATTACCTGTATAGATTGTTTAGGAAGTCTAAT | 22942 |
| gb:MT072688 | Organism:Severe | CTTGATTCTAAGGTTGGTGGTAATTATAATTACCTGTATAGATTGTTTAGGAAGTCTAAT | 22927 |
| gb:MN996527 | Organism:Severe | CTTGATTCTAAGGTTGGTGGTAATTATAATTACCTGTATAGATTGTTTAGGAAGTCTAAT | 22909 |
| gb:MT093631 | Organism:Severe | CTTGATTCTAAGGTTGGTGGTAATTATAATTACCTGTATAGATTGTTTAGGAAGTCTAAT | 22980 |
| gb:MT106053 | Organism:Severe | CTTGATTCTAAGGTTGGTGGTAATTATAATTACCTGTATAGATTGTTTAGGAAGTCTAAT | 22942 |
| gb:MT019533 | Organism:Severe | CTTGATTCTAAGGTTGGTGGTAATTATAATTACCTGTATAGATTGTTTAGGAAGTCTAAT | 22942 |



|             |                 |                                                              |       |
|-------------|-----------------|--------------------------------------------------------------|-------|
| gb:MT019531 | Organism:Severe | CTTGATTCTAAGGTTGGTGGTAATTATAATTACCTGTATAGATTGTTTAGGAAGTCTAAT | 22942 |
| gb:MN996528 | Organism:Severe | CTTGATTCTAAGGTTGGTGGTAATTATAATTACCTGTATAGATTGTTTAGGAAGTCTAAT | 22942 |
| gb:MN996530 | Organism:Severe | CTTGATTCTAAGGTTGGTGGTAATTATAATTACCTGTATAGATTGTTTAGGAAGTCTAAT | 22928 |
| gb:MN908947 | Organism:Severe | CTTGATTCTAAGGTTGGTGGTAATTATAATTACCTGTATAGATTGTTTAGGAAGTCTAAT | 22942 |
| gb:MT019532 | Organism:Severe | CTTGATTCTAAGGTTGGTGGTAATTATAATTACCTGTATAGATTGTTTAGGAAGTCTAAT | 22942 |

\*\*\*\*\*

|             |                 |                                                              |       |
|-------------|-----------------|--------------------------------------------------------------|-------|
| gb:MT020781 | Organism:Severe | CTCAAACCTTTTGAGAGAGATATTTCAACTGAAATCTATCAGGCCGGTAGCACACCTTGT | 22990 |
| gb:MT007544 | Organism:Severe | CTCAAACCTTTTGAGAGAGATATTTCAACTGAAATCTATCAGGCCGGTAGCACACCTTGT | 23002 |
| gb:MN994467 | Organism:Severe | CTCAAACCTTTTGAGAGAGATATTTCAACTGAAATCTATCAGGCCGGTAGCACACCTTGT | 23002 |
| gb:MT044257 | Organism:Severe | CTCAAACCTTTTGAGAGAGATATTTCAACTGAAATCTATCAGGCCGGTAGCACACCTTGT | 23002 |
| gb:MT106054 | Organism:Severe | CTCAAACCTTTTGAGAGAGATATTTCAACTGAAATCTATCAGGCCGGTAGCACACCTTGT | 23002 |
| gb:MT049951 | Organism:Severe | CTCAAACCTTTTGAGAGAGATATTTCAACTGAAATCTATCAGGCCGGTAGCACACCTTGT | 23002 |
| gb:MN975262 | Organism:Severe | CTCAAACCTTTTGAGAGAGATATTTCAACTGAAATCTATCAGGCCGGTAGCACACCTTGT | 23002 |
| gb:MT106052 | Organism:Severe | CTCAAACCTTTTGAGAGAGATATTTCAACTGAAATCTATCAGGCCGGTAGCACACCTTGT | 23002 |
| gb:LC522975 | Organism:Severe | CTCAAACCTTTTGAGAGAGATATTTCAACTGAAATCTATCAGGCCGGTAGCACACCTTGT | 22999 |
| gb:LC522973 | Organism:Severe | CTCAAACCTTTTGAGAGAGATATTTCAACTGAAATCTATCAGGCCGGTAGCACACCTTGT | 22999 |
| gb:LC522974 | Organism:Severe | CTCAAACCTTTTGAGAGAGATATTTCAACTGAAATCTATCAGGCCGGTAGCACACCTTGT | 22999 |
| gb:MN985325 | Organism:Severe | CTCAAACCTTTTGAGAGAGATATTTCAACTGAAATCTATCAGGCCGGTAGCACACCTTGT | 23002 |
| gb:MT020881 | Organism:Severe | CTCAAACCTTTTGAGAGAGATATTTCAACTGAAATCTATCAGGCCGGTAGCACACCTTGT | 23002 |
| gb:MT020880 | Organism:Severe | CTCAAACCTTTTGAGAGAGATATTTCAACTGAAATCTATCAGGCCGGTAGCACACCTTGT | 23002 |
| gb:MT066175 | Organism:Severe | CTCAAACCTTTTGAGAGAGATATTTCAACTGAAATCTATCAGGCCGGTAGCACACCTTGT | 23002 |
| gb:MN997409 | Organism:Severe | CTCAAACCTTTTGAGAGAGATATTTCAACTGAAATCTATCAGGCCGGTAGCACACCTTGT | 23002 |
| gb:MN938384 | Organism:Severe | CTCAAACCTTTTGAGAGAGATATTTCAACTGAAATCTATCAGGCCGGTAGCACACCTTGT | 22970 |
| gb:MT044258 | Organism:Severe | CTCAAACCTTTTGAGAGAGATATTTCAACTGAAATCTATCAGGCCGGTAGCACACCTTGT | 22978 |
| gb:MT039890 | Organism:Severe | CTCAAACCTTTTGAGAGAGATATTTCAACTGAAATCTATCAGGCCGGTAGCACACCTTGT | 23002 |
| gb:MN988713 | Organism:Severe | CTCAAACCTTTTGAGAGAGATATTTCAACTGAAATCTATCAGGCCGGTAGCACACCTTGT | 23002 |
| gb:LC521925 | Organism:Severe | CTCAAACCTTTTGAGAGAGATATTTCAACTGAAATCTATCAGGCCGGTAGCACACCTTGT | 22975 |
| gb:MT093571 | Organism:Severe | CTCAAACCTTTTGAGAGAGATATTTCAACTGAAATCTATCAGGCCGGTAGCACACCTTGT | 23002 |
| gb:MT039887 | Organism:Severe | CTCAAACCTTTTGAGAGAGATATTTCAACTGAAATCTATCAGGCCGGTAGCACACCTTGT | 22999 |
| gb:MT019530 | Organism:Severe | CTCAAACCTTTTGAGAGAGATATTTCAACTGAAATCTATCAGGCCGGTAGCACACCTTGT | 23002 |
| gb:MT039888 | Organism:Severe | CTCAAACCTTTTGAGAGAGATATTTCAACTGAAATCTATCAGGCCGGTAGCACACCTTGT | 23002 |
| gb:LC522972 | Organism:Severe | CTCAAACCTTTTGAGAGAGATATTTCAACTGAAATCTATCAGGCCGGTAGCACACCTTGT | 22999 |
| gb:MT027063 | Organism:Severe | CTCAAACCTTTTGAGAGAGATATTTCAACTGAAATCTATCAGGCCGGTAGCACACCTTGT | 23002 |
| gb:MT027062 | Organism:Severe | CTCAAACCTTTTGAGAGAGATATTTCAACTGAAATCTATCAGGCCGGTAGCACACCTTGT | 23002 |
| gb:MT019529 | Organism:Severe | CTCAAACCTTTTGAGAGAGATATTTCAACTGAAATCTATCAGGCCGGTAGCACACCTTGT | 23002 |
| gb:MN996529 | Organism:Severe | CTCAAACCTTTTGAGAGAGATATTTCAACTGAAATCTATCAGGCCGGTAGCACACCTTGT | 22990 |
| gb:MN996531 | Organism:Severe | CTCAAACCTTTTGAGAGAGATATTTCAACTGAAATCTATCAGGCCGGTAGCACACCTTGT | 22989 |
| gb:MT066176 | Organism:Severe | CTCAAACCTTTTGAGAGAGATATTTCAACTGAAATCTATCAGGCCGGTAGCACACCTTGT | 23002 |
| gb:MT027064 | Organism:Severe | CTCAAACCTTTTGAGAGAGATATTTCAACTGAAATCTATCAGGCCGGTAGCACACCTTGT | 23002 |
| gb:MN994468 | Organism:Severe | CTCAAACCTTTTGAGAGAGATATTTCAACTGAAATCTATCAGGCCGGTAGCACACCTTGT | 23002 |
| gb:MT072688 | Organism:Severe | CTCAAACCTTTTGAGAGAGATATTTCAACTGAAATCTATCAGGCCGGTAGCACACCTTGT | 22987 |
| gb:MN996527 | Organism:Severe | CTCAAACCTTTTGAGAGAGATATTTCAACTGAAATCTATCAGGCCGGTAGCACACCTTGT | 22969 |
| gb:MT093631 | Organism:Severe | CTCAAACCTTTTGAGAGAGATATTTCAACTGAAATCTATCAGGCCGGTAGCACACCTTGT | 23040 |
| gb:MT106053 | Organism:Severe | CTCAAACCTTTTGAGAGAGATATTTCAACTGAAATCTATCAGGCCGGTAGCACACCTTGT | 23002 |
| gb:MT019533 | Organism:Severe | CTCAAACCTTTTGAGAGAGATATTTCAACTGAAATCTATCAGGCCGGTAGCACACCTTGT | 23002 |
| gb:MT019531 | Organism:Severe | CTCAAACCTTTTGAGAGAGATATTTCAACTGAAATCTATCAGGCCGGTAGCACACCTTGT | 23002 |
| gb:MN996528 | Organism:Severe | CTCAAACCTTTTGAGAGAGATATTTCAACTGAAATCTATCAGGCCGGTAGCACACCTTGT | 23002 |
| gb:MN996530 | Organism:Severe | CTCAAACCTTTTGAGAGAGATATTTCAACTGAAATCTATCAGGCCGGTAGCACACCTTGT | 22988 |
| gb:MN908947 | Organism:Severe | CTCAAACCTTTTGAGAGAGATATTTCAACTGAAATCTATCAGGCCGGTAGCACACCTTGT | 23002 |
| gb:MT019532 | Organism:Severe | CTCAAACCTTTTGAGAGAGATATTTCAACTGAAATCTATCAGGCCGGTAGCACACCTTGT | 23002 |

\*\*\*\*\*

|             |                 |                                                             |       |
|-------------|-----------------|-------------------------------------------------------------|-------|
| gb:MT020781 | Organism:Severe | AATGGTGTGAAGGTTTAAATTGTTACTTTCCTTTACAATCATATGGTTTCCAACCCACT | 23050 |
| gb:MT007544 | Organism:Severe | AATGGTGTGAAGGTTTAAATTGTTACTTTCCTTTACAATCATATGGTTTCCAACCCACT | 23062 |
| gb:MN994467 | Organism:Severe | AATGGTGTGAAGGTTTAAATTGTTACTTTCCTTTACAATCATATGGTTTCCAACCCACT | 23062 |
| gb:MT044257 | Organism:Severe | AATGGTGTGAAGGTTTAAATTGTTACTTTCCTTTACAATCATATGGTTTCCAACCCACT | 23062 |
| gb:MT106054 | Organism:Severe | AATGGTGTGAAGGTTTAAATTGTTACTTTCCTTTACAATCATATGGTTTCCAACCCACT | 23062 |
| gb:MT049951 | Organism:Severe | AATGGTGTGAAGGTTTAAATTGTTACTTTCCTTTACAATCATATGGTTTCCAACCCACT | 23062 |
| gb:MN975262 | Organism:Severe | AATGGTGTGAAGGTTTAAATTGTTACTTTCCTTTACAATCATATGGTTTCCAACCCACT | 23062 |
| gb:MT106052 | Organism:Severe | AATGGTGTGAAGGTTTAAATTGTTACTTTCCTTTACAATCATATGGTTTCCAACCCACT | 23062 |
| gb:LC522975 | Organism:Severe | AATGGTGTGAAGGTTTAAATTGTTACTTTCCTTTACAATCATATGGTTTCCAACCCACT | 23059 |
| gb:LC522973 | Organism:Severe | AATGGTGTGAAGGTTTAAATTGTTACTTTCCTTTACAATCATATGGTTTCCAACCCACT | 23059 |
| gb:LC522974 | Organism:Severe | AATGGTGTGAAGGTTTAAATTGTTACTTTCCTTTACAATCATATGGTTTCCAACCCACT | 23059 |
| gb:MN985325 | Organism:Severe | AATGGTGTGAAGGTTTAAATTGTTACTTTCCTTTACAATCATATGGTTTCCAACCCACT | 23062 |

|             |                 |                                                           |       |
|-------------|-----------------|-----------------------------------------------------------|-------|
| gb:MT020881 | Organism:Severe | AATGGTGTGAAGGTTTTAATTGTTACTTTCTTTACAATCATATGGTTCCAACCCACT | 23062 |
| gb:MT020880 | Organism:Severe | AATGGTGTGAAGGTTTTAATTGTTACTTTCTTTACAATCATATGGTTCCAACCCACT | 23062 |
| gb:MT066175 | Organism:Severe | AATGGTGTGAAGGTTTTAATTGTTACTTTCTTTACAATCATATGGTTCCAACCCACT | 23062 |
| gb:MN997409 | Organism:Severe | AATGGTGTGAAGGTTTTAATTGTTACTTTCTTTACAATCATATGGTTCCAACCCACT | 23062 |
| gb:MN938384 | Organism:Severe | AATGGTGTGAAGGTTTTAATTGTTACTTTCTTTACAATCATATGGTTCCAACCCACT | 23030 |
| gb:MT044258 | Organism:Severe | AATGGTGTGAAGGTTTTAATTGTTACTTTCTTTACAATCATATGGTTCCAACCCACT | 23038 |
| gb:MT039890 | Organism:Severe | AATGGTGTGAAGGTTTTAATTGTTACTTTCTTTACAATCATATGGTTCCAACCCACT | 23062 |
| gb:MN988713 | Organism:Severe | AATGGTGTGAAGGTTTTAATTGTTACTTTCTTTACAATCATATGGTTCCAACCCACT | 23062 |
| gb:LC521925 | Organism:Severe | AATGGTGTGAAGGTTTTAATTGTTACTTTCTTTACAATCATATGGTTCCAACCCACT | 23035 |
| gb:MT093571 | Organism:Severe | AATGGTGTGAAGGTTTTAATTGTTACTTTCTTTACAATCATATGGTTCCAACCCACT | 23062 |
| gb:MT039887 | Organism:Severe | AATGGTGTGAAGGTTTTAATTGTTACTTTCTTTACAATCATATGGTTCCAACCCACT | 23059 |
| gb:MT019530 | Organism:Severe | AATGGTGTGAAGGTTTTAATTGTTACTTTCTTTACAATCATATGGTTCCAACCCACT | 23062 |
| gb:MT039888 | Organism:Severe | AATGGTGTGAAGGTTTTAATTGTTACTTTCTTTACAATCATATGGTTCCAACCCACT | 23062 |
| gb:LC522972 | Organism:Severe | AATGGTGTGAAGGTTTTAATTGTTACTTTCTTTACAATCATATGGTTCCAACCCACT | 23059 |
| gb:MT027063 | Organism:Severe | AATGGTGTGAAGGTTTTAATTGTTACTTTCTTTACAATCATATGGTTCCAACCCACT | 23062 |
| gb:MT027062 | Organism:Severe | AATGGTGTGAAGGTTTTAATTGTTACTTTCTTTACAATCATATGGTTCCAACCCACT | 23062 |
| gb:MT019529 | Organism:Severe | AATGGTGTGAAGGTTTTAATTGTTACTTTCTTTACAATCATATGGTTCCAACCCACT | 23062 |
| gb:MN996529 | Organism:Severe | AATGGTGTGAAGGTTTTAATTGTTACTTTCTTTACAATCATATGGTTCCAACCCACT | 23050 |
| gb:MN996531 | Organism:Severe | AATGGTGTGAAGGTTTTAATTGTTACTTTCTTTACAATCATATGGTTCCAACCCACT | 23049 |
| gb:MT066176 | Organism:Severe | AATGGTGTGAAGGTTTTAATTGTTACTTTCTTTACAATCATATGGTTCCAACCCACT | 23062 |
| gb:MT027064 | Organism:Severe | AATGGTGTGAAGGTTTTAATTGTTACTTTCTTTACAATCATATGGTTCCAACCCACT | 23062 |
| gb:MN994468 | Organism:Severe | AATGGTGTGAAGGTTTTAATTGTTACTTTCTTTACAATCATATGGTTCCAACCCACT | 23062 |
| gb:MT072688 | Organism:Severe | AATGGTGTGAAGGTTTTAATTGTTACTTTCTTTACAATCATATGGTTCCAACCCACT | 23047 |
| gb:MN996527 | Organism:Severe | AATGGTGTGAAGGTTTTAATTGTTACTTTCTTTACAATCATATGGTTCCAACCCACT | 23029 |
| gb:MT093631 | Organism:Severe | AATGGTGTGAAGGTTTTAATTGTTACTTTCTTTACAATCATATGGTTCCAACCCACT | 23100 |
| gb:MT106053 | Organism:Severe | AATGGTGTGAAGGTTTTAATTGTTACTTTCTTTACAATCATATGGTTCCAACCCACT | 23062 |
| gb:MT019533 | Organism:Severe | AATGGTGTGAAGGTTTTAATTGTTACTTTCTTTACAATCATATGGTTCCAACCCACT | 23062 |
| gb:MT019531 | Organism:Severe | AATGGTGTGAAGGTTTTAATTGTTACTTTCTTTACAATCATATGGTTCCAACCCACT | 23062 |
| gb:MN996528 | Organism:Severe | AATGGTGTGAAGGTTTTAATTGTTACTTTCTTTACAATCATATGGTTCCAACCCACT | 23062 |
| gb:MN996530 | Organism:Severe | AATGGTGTGAAGGTTTTAATTGTTACTTTCTTTACAATCATATGGTTCCAACCCACT | 23048 |
| gb:MN908947 | Organism:Severe | AATGGTGTGAAGGTTTTAATTGTTACTTTCTTTACAATCATATGGTTCCAACCCACT | 23062 |
| gb:MT019532 | Organism:Severe | AATGGTGTGAAGGTTTTAATTGTTACTTTCTTTACAATCATATGGTTCCAACCCACT | 23062 |

\*\*\*\*\*

|             |                 |                                                             |       |
|-------------|-----------------|-------------------------------------------------------------|-------|
| gb:MT020781 | Organism:Severe | AATGGTGTGGTTACCAACCATACAGAGTAGTAGTACTTTCTTTGAACCTTCTACATGCA | 23110 |
| gb:MT007544 | Organism:Severe | AATGGTGTGGTTACCAACCATACAGAGTAGTAGTACTTTCTTTGAACCTTCTACATGCA | 23122 |
| gb:MN994467 | Organism:Severe | AATGGTGTGGTTACCAACCATACAGAGTAGTAGTACTTTCTTTGAACCTTCTACATGCA | 23122 |
| gb:MT044257 | Organism:Severe | AATGGTGTGGTTACCAACCATACAGAGTAGTAGTACTTTCTTTGAACCTTCTACATGCA | 23122 |
| gb:MT106054 | Organism:Severe | AATGGTGTGGTTACCAACCATACAGAGTAGTAGTACTTTCTTTGAACCTTCTACATGCA | 23122 |
| gb:MT049951 | Organism:Severe | AATGGTGTGGTTACCAACCATACAGAGTAGTAGTACTTTCTTTGAACCTTCTACATGCA | 23122 |
| gb:MN975262 | Organism:Severe | AATGGTGTGGTTACCAACCATACAGAGTAGTAGTACTTTCTTTGAACCTTCTACATGCA | 23122 |
| gb:MT106052 | Organism:Severe | AATGGTGTGGTTACCAACCATACAGAGTAGTAGTACTTTCTTTGAACCTTCTACATGCA | 23122 |
| gb:LC522975 | Organism:Severe | AATGGTGTGGTTACCAACCATACAGAGTAGTAGTACTTTCTTTGAACCTTCTACATGCA | 23119 |
| gb:LC522973 | Organism:Severe | AATGGTGTGGTTACCAACCATACAGAGTAGTAGTACTTTCTTTGAACCTTCTACATGCA | 23119 |
| gb:LC522974 | Organism:Severe | AATGGTGTGGTTACCAACCATACAGAGTAGTAGTACTTTCTTTGAACCTTCTACATGCA | 23119 |
| gb:MN985325 | Organism:Severe | AATGGTGTGGTTACCAACCATACAGAGTAGTAGTACTTTCTTTGAACCTTCTACATGCA | 23122 |
| gb:MT020881 | Organism:Severe | AATGGTGTGGTTACCAACCATACAGAGTAGTAGTACTTTCTTTGAACCTTCTACATGCA | 23122 |
| gb:MT020880 | Organism:Severe | AATGGTGTGGTTACCAACCATACAGAGTAGTAGTACTTTCTTTGAACCTTCTACATGCA | 23122 |
| gb:MT066175 | Organism:Severe | AATGGTGTGGTTACCAACCATACAGAGTAGTAGTACTTTCTTTGAACCTTCTACATGCA | 23122 |
| gb:MN997409 | Organism:Severe | AATGGTGTGGTTACCAACCATACAGAGTAGTAGTACTTTCTTTGAACCTTCTACATGCA | 23122 |
| gb:MN938384 | Organism:Severe | AATGGTGTGGTTACCAACCATACAGAGTAGTAGTACTTTCTTTGAACCTTCTACATGCA | 23090 |
| gb:MT044258 | Organism:Severe | AATGGTGTGGTTACCAACCATACAGAGTAGTAGTACTTTCTTTGAACCTTCTACATGCA | 23098 |
| gb:MT039890 | Organism:Severe | AATGGTGTGGTTACCAACCATACAGAGTAGTAGTACTTTCTTTGAACCTTCTACATGCA | 23122 |
| gb:MN988713 | Organism:Severe | AATGGTGTGGTTACCAACCATACAGAGTAGTAGTACTTTCTTTGAACCTTCTACATGCA | 23122 |
| gb:LC521925 | Organism:Severe | AATGGTGTGGTTACCAACCATACAGAGTAGTAGTACTTTCTTTGAACCTTCTACATGCA | 23095 |
| gb:MT093571 | Organism:Severe | AATGGTGTGGTTACCAACCATACAGAGTAGTAGTACTTTCTTTGAACCTTCTACATGCA | 23122 |
| gb:MT039887 | Organism:Severe | AATGGTGTGGTTACCAACCATACAGAGTAGTAGTACTTTCTTTGAACCTTCTACATGCA | 23119 |
| gb:MT019530 | Organism:Severe | AATGGTGTGGTTACCAACCATACAGAGTAGTAGTACTTTCTTTGAACCTTCTACATGCA | 23122 |
| gb:MT039888 | Organism:Severe | AATGGTGTGGTTACCAACCATACAGAGTAGTAGTACTTTCTTTGAACCTTCTACATGCA | 23122 |
| gb:LC522972 | Organism:Severe | AATGGTGTGGTTACCAACCATACAGAGTAGTAGTACTTTCTTTGAACCTTCTACATGCA | 23119 |
| gb:MT027063 | Organism:Severe | AATGGTGTGGTTACCAACCATACAGAGTAGTAGTACTTTCTTTGAACCTTCTACATGCA | 23122 |
| gb:MT027062 | Organism:Severe | AATGGTGTGGTTACCAACCATACAGAGTAGTAGTACTTTCTTTGAACCTTCTACATGCA | 23122 |
| gb:MT019529 | Organism:Severe | AATGGTGTGGTTACCAACCATACAGAGTAGTAGTACTTTCTTTGAACCTTCTACATGCA | 23122 |
| gb:MN996529 | Organism:Severe | AATGGTGTGGTTACCAACCATACAGAGTAGTAGTACTTTCTTTGAACCTTCTACATGCA | 23110 |
| gb:MN996531 | Organism:Severe | AATGGTGTGGTTACCAACCATACAGAGTAGTAGTACTTTCTTTGAACCTTCTACATGCA | 23109 |

|             |                 |                                                              |       |
|-------------|-----------------|--------------------------------------------------------------|-------|
| gb:MT066176 | Organism:Severe | AATGGTGTGGTTACCAACCATACAGAGTAGTAGTACTTTCTTTTGAACCTTCTACATGCA | 23122 |
| gb:MT027064 | Organism:Severe | AATGGTGTGGTTACCAACCATACAGAGTAGTAGTACTTTCTTTTGAACCTTCTACATGCA | 23122 |
| gb:MN994468 | Organism:Severe | AATGGTGTGGTTACCAACCATACAGAGTAGTAGTACTTTCTTTTGAACCTTCTACATGCA | 23122 |
| gb:MT072688 | Organism:Severe | AATGGTGTGGTTACCAACCATACAGAGTAGTAGTACTTTCTTTTGAACCTTCTACATGCA | 23107 |
| gb:MN996527 | Organism:Severe | AATGGTGTGGTTACCAACCATACAGAGTAGTAGTACTTTCTTTTGAACCTTCTACATGCA | 23089 |
| gb:MT093631 | Organism:Severe | AATGGTGTGGTTACCAACCATACAGAGTAGTAGTACTTTCTTTTGAACCTTCTACATGCA | 23160 |
| gb:MT106053 | Organism:Severe | AATGGTGTGGTTACCAACCATACAGAGTAGTAGTACTTTCTTTTGAACCTTCTACATGCA | 23122 |
| gb:MT019533 | Organism:Severe | AATGGTGTGGTTACCAACCATACAGAGTAGTAGTACTTTCTTTTGAACCTTCTACATGCA | 23122 |
| gb:MT019531 | Organism:Severe | AATGGTGTGGTTACCAACCATACAGAGTAGTAGTACTTTCTTTTGAACCTTCTACATGCA | 23122 |
| gb:MN996528 | Organism:Severe | AATGGTGTGGTTACCAACCATACAGAGTAGTAGTACTTTCTTTTGAACCTTCTACATGCA | 23122 |
| gb:MN996530 | Organism:Severe | AATGGTGTGGTTACCAACCATACAGAGTAGTAGTACTTTCTTTTGAACCTTCTACATGCA | 23108 |
| gb:MN908947 | Organism:Severe | AATGGTGTGGTTACCAACCATACAGAGTAGTAGTACTTTCTTTTGAACCTTCTACATGCA | 23122 |
| gb:MT019532 | Organism:Severe | AATGGTGTGGTTACCAACCATACAGAGTAGTAGTACTTTCTTTTGAACCTTCTACATGCA | 23122 |

\*\*\*\*\*

|             |                 |                                                              |       |
|-------------|-----------------|--------------------------------------------------------------|-------|
| gb:MT020781 | Organism:Severe | CCAGCAACTGTTTGTGGACCTAAAAAGTCTACTAATTTGGTTAAAAACAAATGTGTCAAT | 23170 |
| gb:MT007544 | Organism:Severe | CCAGCAACTGTTTGTGGACCTAAAAAGTCTACTAATTTGGTTAAAAACAAATGTGTCAAT | 23182 |
| gb:MN994467 | Organism:Severe | CCAGCAACTGTTTGTGGACCTAAAAAGTCTACTAATTTGGTTAAAAACAAATGTGTCAAT | 23182 |
| gb:MT044257 | Organism:Severe | CCAGCAACTGTTTGTGGACCTAAAAAGTCTACTAATTTGGTTAAAAACAAATGTGTCAAT | 23182 |
| gb:MT106054 | Organism:Severe | CCAGCAACTGTTTGTGGACCTAAAAAGTCTACTAATTTGGTTAAAAACAAATGTGTCAAT | 23182 |
| gb:MT049951 | Organism:Severe | CCAGCAACTGTTTGTGGACCTAAAAAGTCTACTAATTTGGTTAAAAACAAATGTGTCAAT | 23182 |
| gb:MN975262 | Organism:Severe | CCAGCAACTGTTTGTGGACCTAAAAAGTCTACTAATTTGGTTAAAAACAAATGTGTCAAT | 23182 |
| gb:MT106052 | Organism:Severe | CCAGCAACTGTTTGTGGACCTAAAAAGTCTACTAATTTGGTTAAAAACAAATGTGTCAAT | 23182 |
| gb:LC522975 | Organism:Severe | CCAGCAACTGTTTGTGGACCTAAAAAGTCTACTAATTTGGTTAAAAACAAATGTGTCAAT | 23179 |
| gb:LC522973 | Organism:Severe | CCAGCAACTGTTTGTGGACCTAAAAAGTCTACTAATTTGGTTAAAAACAAATGTGTCAAT | 23179 |
| gb:LC522974 | Organism:Severe | CCAGCAACTGTTTGTGGACCTAAAAAGTCTACTAATTTGGTTAAAAACAAATGTGTCAAT | 23179 |
| gb:MN985325 | Organism:Severe | CCAGCAACTGTTTGTGGACCTAAAAAGTCTACTAATTTGGTTAAAAACAAATGTGTCAAT | 23182 |
| gb:MT020881 | Organism:Severe | CCAGCAACTGTTTGTGGACCTAAAAAGTCTACTAATTTGGTTAAAAACAAATGTGTCAAT | 23182 |
| gb:MT020880 | Organism:Severe | CCAGCAACTGTTTGTGGACCTAAAAAGTCTACTAATTTGGTTAAAAACAAATGTGTCAAT | 23182 |
| gb:MT066175 | Organism:Severe | CCAGCAACTGTTTGTGGACCTAAAAAGTCTACTAATTTGGTTAAAAACAAATGTGTCAAT | 23182 |
| gb:MN997409 | Organism:Severe | CCAGCAACTGTTTGTGGACCTAAAAAGTCTACTAATTTGGTTAAAAACAAATGTGTCAAT | 23182 |
| gb:MN938384 | Organism:Severe | CCAGCAACTGTTTGTGGACCTAAAAAGTCTACTAATTTGGTTAAAAACAAATGTGTCAAT | 23150 |
| gb:MT044258 | Organism:Severe | CCAGCAACTGTTTGTGGACCTAAAAAGTCTACTAATTTGGTTAAAAACAAATGTGTCAAT | 23158 |
| gb:MT039890 | Organism:Severe | CCAGCAACTGTTTGTGGACCTAAAAAGTCTACTAATTTGGTTAAAAACAAATGTGTCAAT | 23182 |
| gb:MN988713 | Organism:Severe | CCAGCAACTGTTTGTGGACCTAAAAAGTCTACTAATTTGGTTAAAAACAAATGTGTCAAT | 23182 |
| gb:LC521925 | Organism:Severe | CCAGCAACTGTTTGTGGACCTAAAAAGTCTACTAATTTGGTTAAAAACAAATGTGTCAAT | 23155 |
| gb:MT093571 | Organism:Severe | CCAGCAACTGTTTGTGGACCTAAAAAGTCTACTAATTTGGTTAAAAACAAATGTGTCAAT | 23182 |
| gb:MT039887 | Organism:Severe | CCAGCAACTGTTTGTGGACCTAAAAAGTCTACTAATTTGGTTAAAAACAAATGTGTCAAT | 23179 |
| gb:MT019530 | Organism:Severe | CCAGCAACTGTTTGTGGACCTAAAAAGTCTACTAATTTGGTTAAAAACAAATGTGTCAAT | 23182 |
| gb:MT039888 | Organism:Severe | CCAGCAACTGTTTGTGGACCTAAAAAGTCTACTAATTTGGTTAAAAACAAATGTGTCAAT | 23182 |
| gb:LC522972 | Organism:Severe | CCAGCAACTGTTTGTGGACCTAAAAAGTCTACTAATTTGGTTAAAAACAAATGTGTCAAT | 23179 |
| gb:MT027063 | Organism:Severe | CCAGCAACTGTTTGTGGACCTAAAAAGTCTACTAATTTGGTTAAAAACAAATGTGTCAAT | 23182 |
| gb:MT027062 | Organism:Severe | CCAGCAACTGTTTGTGGACCTAAAAAGTCTACTAATTTGGTTAAAAACAAATGTGTCAAT | 23182 |
| gb:MT019529 | Organism:Severe | CCAGCAACTGTTTGTGGACCTAAAAAGTCTACTAATTTGGTTAAAAACAAATGTGTCAAT | 23182 |
| gb:MN996529 | Organism:Severe | CCAGCAACTGTTTGTGGACCTAAAAAGTCTACTAATTTGGTTAAAAACAAATGTGTCAAT | 23170 |
| gb:MN996531 | Organism:Severe | CCAGCAACTGTTTGTGGACCTAAAAAGTCTACTAATTTGGTTAAAAACAAATGTGTCAAT | 23169 |
| gb:MT066176 | Organism:Severe | CCAGCAACTGTTTGTGGACCTAAAAAGTCTACTAATTTGGTTAAAAACAAATGTGTCAAT | 23182 |
| gb:MT027064 | Organism:Severe | CCAGCAACTGTTTGTGGACCTAAAAAGTCTACTAATTTGGTTAAAAACAAATGTGTCAAT | 23182 |
| gb:MN994468 | Organism:Severe | CCAGCAACTGTTTGTGGACCTAAAAAGTCTACTAATTTGGTTAAAAACAAATGTGTCAAT | 23182 |
| gb:MT072688 | Organism:Severe | CCAGCAACTGTTTGTGGACCTAAAAAGTCTACTAATTTGGTTAAAAACAAATGTGTCAAT | 23167 |
| gb:MN996527 | Organism:Severe | CCAGCAACTGTTTGTGGACCTAAAAAGTCTACTAATTTGGTTAAAAACAAATGTGTCAAT | 23149 |
| gb:MT093631 | Organism:Severe | CCAGCAACTGTTTGTGGACCTAAAAAGTCTACTAATTTGGTTAAAAACAAATGTGTCAAT | 23220 |
| gb:MT106053 | Organism:Severe | CCAGCAACTGTTTGTGGACCTAAAAAGTCTACTAATTTGGTTAAAAACAAATGTGTCAAT | 23182 |
| gb:MT019533 | Organism:Severe | CCAGCAACTGTTTGTGGACCTAAAAAGTCTACTAATTTGGTTAAAAACAAATGTGTCAAT | 23182 |
| gb:MT019531 | Organism:Severe | CCAGCAACTGTTTGTGGACCTAAAAAGTCTACTAATTTGGTTAAAAACAAATGTGTCAAT | 23182 |
| gb:MN996528 | Organism:Severe | CCAGCAACTGTTTGTGGACCTAAAAAGTCTACTAATTTGGTTAAAAACAAATGTGTCAAT | 23182 |
| gb:MN996530 | Organism:Severe | CCAGCAACTGTTTGTGGACCTAAAAAGTCTACTAATTTGGTTAAAAACAAATGTGTCAAT | 23168 |
| gb:MN908947 | Organism:Severe | CCAGCAACTGTTTGTGGACCTAAAAAGTCTACTAATTTGGTTAAAAACAAATGTGTCAAT | 23182 |
| gb:MT019532 | Organism:Severe | CCAGCAACTGTTTGTGGACCTAAAAAGTCTACTAATTTGGTTAAAAACAAATGTGTCAAT | 23182 |

\*\*\*\*\*

|             |                 |                                                               |       |
|-------------|-----------------|---------------------------------------------------------------|-------|
| gb:MT020781 | Organism:Severe | TTCAACTTCAATGGTTTAAACAGGCACAGGTGTTCTTACTGAGTCTAACAAAAAGTTTCTG | 23230 |
| gb:MT007544 | Organism:Severe | TTCAACTTCAATGGTTTAAACAGGCACAGGTGTTCTTACTGAGTCTAACAAAAAGTTTCTG | 23242 |
| gb:MN994467 | Organism:Severe | TTCAACTTCAATGGTTTAAACAGGCACAGGTGTTCTTACTGAGTCTAACAAAAAGTTTCTG | 23242 |
| gb:MT044257 | Organism:Severe | TTCAACTTCAATGGTTTAAACAGGCACAGGTGTTCTTACTGAGTCTAACAAAAAGTTTCTG | 23242 |



|             |                 |                                                  |       |
|-------------|-----------------|--------------------------------------------------|-------|
| gb:MT019530 | Organism:Severe | CCTTTCCAACAATTTGGCAGAGACATTGCTGACACTACTGATGCTGTC | 23302 |
| gb:MT039888 | Organism:Severe | CCTTTCCAACAATTTGGCAGAGACATTGCTGACACTACTGATGCTGTC | 23302 |
| gb:LC522972 | Organism:Severe | CCTTTCCAACAATTTGGCAGAGACATTGCTGACACTACTGATGCTGTC | 23299 |
| gb:MT027063 | Organism:Severe | CCTTTCCAACAATTTGGCAGAGACATTGCTGACACTACTGATGCTGTC | 23302 |
| gb:MT027062 | Organism:Severe | CCTTTCCAACAATTTGGCAGAGACATTGCTGACACTACTGATGCTGTC | 23302 |
| gb:MT019529 | Organism:Severe | CCTTTCCAACAATTTGGCAGAGACATTGCTGACACTACTGATGCTGTC | 23302 |
| gb:MN996529 | Organism:Severe | CCTTTCCAACAATTTGGCAGAGACATTGCTGACACTACTGATGCTGTC | 23290 |
| gb:MN996531 | Organism:Severe | CCTTTCCAACAATTTGGCAGAGACATTGCTGACACTACTGATGCTGTC | 23289 |
| gb:MT066176 | Organism:Severe | CCTTTCCAACAATTTGGCAGAGACATTGCTGACACTACTGATGCTGTC | 23302 |
| gb:MT027064 | Organism:Severe | CCTTTCCAACAATTTGGCAGAGACATTGCTGACACTACTGATGCTGTC | 23302 |
| gb:MN994468 | Organism:Severe | CCTTTCCAACAATTTGGCAGAGACATTGCTGACACTACTGATGCTGTC | 23302 |
| gb:MT072688 | Organism:Severe | CCTTTCCAACAATTTGGCAGAGACATTGCTGACACTACTGATGCTGTC | 23287 |
| gb:MN996527 | Organism:Severe | CCTTTCCAACAATTTGGCAGAGACATTGCTGACACTACTGATGCTGTC | 23269 |
| gb:MT093631 | Organism:Severe | CCTTTCCAACAATTTGGCAGAGACATTGCTGACACTACTGATGCTGTC | 23340 |
| gb:MT106053 | Organism:Severe | CCTTTCCAACAATTTGGCAGAGACATTGCTGACACTACTGATGCTGTC | 23302 |
| gb:MT019533 | Organism:Severe | CCTTTCCAACAATTTGGCAGAGACATTGCTGACACTACTGATGCTGTC | 23302 |
| gb:MT019531 | Organism:Severe | CCTTTCCAACAATTTGGCAGAGACATTGCTGACACTACTGATGCTGTC | 23302 |
| gb:MN996528 | Organism:Severe | CCTTTCCAACAATTTGGCAGAGACATTGCTGACACTACTGATGCTGTC | 23302 |
| gb:MN996530 | Organism:Severe | CCTTTCCAACAATTTGGCAGAGACATTGCTGACACTACTGATGCTGTC | 23288 |
| gb:MN908947 | Organism:Severe | CCTTTCCAACAATTTGGCAGAGACATTGCTGACACTACTGATGCTGTC | 23302 |
| gb:MT019532 | Organism:Severe | CCTTTCCAACAATTTGGCAGAGACATTGCTGACACTACTGATGCTGTC | 23302 |

\*\*\*\*\*

|             |                 |                                               |       |
|-------------|-----------------|-----------------------------------------------|-------|
| gb:MT020781 | Organism:Severe | ACACTTGAGATTCCTTGACATTACACCATGTTCTTTTGGTGGTGT | 23350 |
| gb:MT007544 | Organism:Severe | ACACTTGAGATTCCTTGACATTACACCATGTTCTTTTGGTGGTGT | 23362 |
| gb:MN994467 | Organism:Severe | ACACTTGAGATTCCTTGACATTACACCATGTTCTTTTGGTGGTGT | 23362 |
| gb:MT044257 | Organism:Severe | ACACTTGAGATTCCTTGACATTACACCATGTTCTTTTGGTGGTGT | 23362 |
| gb:MT106054 | Organism:Severe | ACACTTGAGATTCCTTGACATTACACCATGTTCTTTTGGTGGTGT | 23362 |
| gb:MT049951 | Organism:Severe | ACACTTGAGATTCCTTGACATTACACCATGTTCTTTTGGTGGTGT | 23362 |
| gb:MN975262 | Organism:Severe | ACACTTGAGATTCCTTGACATTACACCATGTTCTTTTGGTGGTGT | 23362 |
| gb:MT106052 | Organism:Severe | ACACTTGAGATTCCTTGACATTACACCATGTTCTTTTGGTGGTGT | 23362 |
| gb:LC522975 | Organism:Severe | ACACTTGAGATTCCTTGACATTACACCATGTTCTTTTGGTGGTGT | 23359 |
| gb:LC522973 | Organism:Severe | ACACTTGAGATTCCTTGACATTACACCATGTTCTTTTGGTGGTGT | 23359 |
| gb:LC522974 | Organism:Severe | ACACTTGAGATTCCTTGACATTACACCATGTTCTTTTGGTGGTGT | 23359 |
| gb:MN985325 | Organism:Severe | ACACTTGAGATTCCTTGACATTACACCATGTTCTTTTGGTGGTGT | 23362 |
| gb:MT020881 | Organism:Severe | ACACTTGAGATTCCTTGACATTACACCATGTTCTTTTGGTGGTGT | 23362 |
| gb:MT020880 | Organism:Severe | ACACTTGAGATTCCTTGACATTACACCATGTTCTTTTGGTGGTGT | 23362 |
| gb:MT066175 | Organism:Severe | ACACTTGAGATTCCTTGACATTACACCATGTTCTTTTGGTGGTGT | 23362 |
| gb:MN997409 | Organism:Severe | ACACTTGAGATTCCTTGACATTACACCATGTTCTTTTGGTGGTGT | 23362 |
| gb:MN938384 | Organism:Severe | ACACTTGAGATTCCTTGACATTACACCATGTTCTTTTGGTGGTGT | 23330 |
| gb:MT044258 | Organism:Severe | ACACTTGAGATTCCTTGACATTACACCATGTTCTTTTGGTGGTGT | 23338 |
| gb:MT039890 | Organism:Severe | ACACTTGAGATTCCTTGACATTACACCATGTTCTTTTGGTGGTGT | 23362 |
| gb:MN988713 | Organism:Severe | ACACTTGAGATTCCTTGACATTACACCATGTTCTTTTGGTGGTGT | 23362 |
| gb:LC521925 | Organism:Severe | ACACTTGAGATTCCTTGACATTACACCATGTTCTTTTGGTGGTGT | 23335 |
| gb:MT093571 | Organism:Severe | ACACTTGAGATTCCTTGACATTACACCATGTTCTTTTGGTGGTGT | 23362 |
| gb:MT039887 | Organism:Severe | ACACTTGAGATTCCTTGACATTACACCATGTTCTTTTGGTGGTGT | 23359 |
| gb:MT019530 | Organism:Severe | ACACTTGAGATTCCTTGACATTACACCATGTTCTTTTGGTGGTGT | 23362 |
| gb:MT039888 | Organism:Severe | ACACTTGAGATTCCTTGACATTACACCATGTTCTTTTGGTGGTGT | 23362 |
| gb:LC522972 | Organism:Severe | ACACTTGAGATTCCTTGACATTACACCATGTTCTTTTGGTGGTGT | 23359 |
| gb:MT027063 | Organism:Severe | ACACTTGAGATTCCTTGACATTACACCATGTTCTTTTGGTGGTGT | 23362 |
| gb:MT027062 | Organism:Severe | ACACTTGAGATTCCTTGACATTACACCATGTTCTTTTGGTGGTGT | 23362 |
| gb:MT019529 | Organism:Severe | ACACTTGAGATTCCTTGACATTACACCATGTTCTTTTGGTGGTGT | 23362 |
| gb:MN996529 | Organism:Severe | ACACTTGAGATTCCTTGACATTACACCATGTTCTTTTGGTGGTGT | 23350 |
| gb:MN996531 | Organism:Severe | ACACTTGAGATTCCTTGACATTACACCATGTTCTTTTGGTGGTGT | 23349 |
| gb:MT066176 | Organism:Severe | ACACTTGAGATTCCTTGACATTACACCATGTTCTTTTGGTGGTGT | 23362 |
| gb:MT027064 | Organism:Severe | ACACTTGAGATTCCTTGACATTACACCATGTTCTTTTGGTGGTGT | 23362 |
| gb:MN994468 | Organism:Severe | ACACTTGAGATTCCTTGACATTACACCATGTTCTTTTGGTGGTGT | 23362 |
| gb:MT072688 | Organism:Severe | ACACTTGAGATTCCTTGACATTACACCATGTTCTTTTGGTGGTGT | 23347 |
| gb:MN996527 | Organism:Severe | ACACTTGAGATTCCTTGACATTACACCATGTTCTTTTGGTGGTGT | 23329 |
| gb:MT093631 | Organism:Severe | ACACTTGAGATTCCTTGACATTACACCATGTTCTTTTGGTGGTGT | 23400 |
| gb:MT106053 | Organism:Severe | ACACTTGAGATTCCTTGACATTACACCATGTTCTTTTGGTGGTGT | 23362 |
| gb:MT019533 | Organism:Severe | ACACTTGAGATTCCTTGACATTACACCATGTTCTTTTGGTGGTGT | 23362 |
| gb:MT019531 | Organism:Severe | ACACTTGAGATTCCTTGACATTACACCATGTTCTTTTGGTGGTGT | 23362 |
| gb:MN996528 | Organism:Severe | ACACTTGAGATTCCTTGACATTACACCATGTTCTTTTGGTGGTGT | 23362 |
| gb:MN996530 | Organism:Severe | ACACTTGAGATTCCTTGACATTACACCATGTTCTTTTGGTGGTGT | 23348 |

|             |                 |                                                              |       |
|-------------|-----------------|--------------------------------------------------------------|-------|
| gb:MN908947 | Organism:Severe | ACACTTGAGATTCTTGACATTACACCATGTTCTTTTGGTGGTGTGACAGTTATAACACCA | 23362 |
| gb:MT019532 | Organism:Severe | ACACTTGAGATTCTTGACATTACACCATGTTCTTTTGGTGGTGTGACAGTTATAACACCA | 23362 |

\*\*\*\*\*

|             |                 |                                                              |       |
|-------------|-----------------|--------------------------------------------------------------|-------|
| gb:MT020781 | Organism:Severe | GGAACAAATACTTCTAACCAGGTTGCTGTTCTTTATCAGGATGTTAACTGCACAGAAGTC | 23410 |
| gb:MT007544 | Organism:Severe | GGAACAAATACTTCTAACCAGGTTGCTGTTCTTTATCAGGATGTTAACTGCACAGAAGTC | 23422 |
| gb:MN994467 | Organism:Severe | GGAACAAATACTTCTAACCAGGTTGCTGTTCTTTATCAGGATGTTAACTGCACAGAAGTC | 23422 |
| gb:MT044257 | Organism:Severe | GGAACAAATACTTCTAACCAGGTTGCTGTTCTTTATCAGGATGTTAACTGCACAGAAGTC | 23422 |
| gb:MT106054 | Organism:Severe | GGAACAAATACTTCTAACCAGGTTGCTGTTCTTTATCAGGATGTTAACTGCACAGAAGTC | 23422 |
| gb:MT049951 | Organism:Severe | GGAACAAATACTTCTAACCAGGTTGCTGTTCTTTATCAGGATGTTAACTGCACAGAAGTC | 23422 |
| gb:MN975262 | Organism:Severe | GGAACAAATACTTCTAACCAGGTTGCTGTTCTTTATCAGGATGTTAACTGCACAGAAGTC | 23422 |
| gb:MT106052 | Organism:Severe | GGAACAAATACTTCTAACCAGGTTGCTGTTCTTTATCAGGATGTTAACTGCACAGAAGTC | 23422 |
| gb:LC522975 | Organism:Severe | GGAACAAATACTTCTAACCAGGTTGCTGTTCTTTATCAGGATGTTAACTGCACAGAAGTC | 23419 |
| gb:LC522973 | Organism:Severe | GGAACAAATACTTCTAACCAGGTTGCTGTTCTTTATCAGGATGTTAACTGCACAGAAGTC | 23419 |
| gb:LC522974 | Organism:Severe | GGAACAAATACTTCTAACCAGGTTGCTGTTCTTTATCAGGATGTTAACTGCACAGAAGTC | 23419 |
| gb:MN985325 | Organism:Severe | GGAACAAATACTTCTAACCAGGTTGCTGTTCTTTATCAGGATGTTAACTGCACAGAAGTC | 23422 |
| gb:MT020881 | Organism:Severe | GGAACAAATACTTCTAACCAGGTTGCTGTTCTTTATCAGGATGTTAACTGCACAGAAGTC | 23422 |
| gb:MT020880 | Organism:Severe | GGAACAAATACTTCTAACCAGGTTGCTGTTCTTTATCAGGATGTTAACTGCACAGAAGTC | 23422 |
| gb:MT066175 | Organism:Severe | GGAACAAATACTTCTAACCAGGTTGCTGTTCTTTATCAGGATGTTAACTGCACAGAAGTC | 23422 |
| gb:MN997409 | Organism:Severe | GGAACAAATACTTCTAACCAGGTTGCTGTTCTTTATCAGGATGTTAACTGCACAGAAGTC | 23422 |
| gb:MN938384 | Organism:Severe | GGAACAAATACTTCTAACCAGGTTGCTGTTCTTTATCAGGATGTTAACTGCACAGAAGTC | 23390 |
| gb:MT044258 | Organism:Severe | GGAACAAATACTTCTAACCAGGTTGCTGTTCTTTATCAGGATGTTAACTGCACAGAAGTC | 23398 |
| gb:MT039890 | Organism:Severe | GGAACAAATACTTCTAACCAGGTTGCTGTTCTTTATCAGGATGTTAACTGCACAGAAGTC | 23422 |
| gb:MN988713 | Organism:Severe | GGAACAAATACTTCTAACCAGGTTGCTGTTCTTTATCAGGATGTTAACTGCACAGAAGTC | 23422 |
| gb:LC521925 | Organism:Severe | GGAACAAATACTTCTAACCAGGTTGCTGTTCTTTATCAGGATGTTAACTGCACAGAAGTC | 23395 |
| gb:MT093571 | Organism:Severe | GGAACAAATACTTCTAACCAGGTTGCTGTTCTTTATCAGGATGTTAACTGCACAGAAGTC | 23422 |
| gb:MT039887 | Organism:Severe | GGAACAAATACTTCTAACCAGGTTGCTGTTCTTTATCAGGATGTTAACTGCACAGAAGTC | 23419 |
| gb:MT019530 | Organism:Severe | GGAACAAATACTTCTAACCAGGTTGCTGTTCTTTATCAGGATGTTAACTGCACAGAAGTC | 23422 |
| gb:MT039888 | Organism:Severe | GGAACAAATACTTCTAACCAGGTTGCTGTTCTTTATCAGGATGTTAACTGCACAGAAGTC | 23422 |
| gb:LC522972 | Organism:Severe | GGAACAAATACTTCTAACCAGGTTGCTGTTCTTTATCAGGATGTTAACTGCACAGAAGTC | 23419 |
| gb:MT027063 | Organism:Severe | GGAACAAATACTTCTAACCAGGTTGCTGTTCTTTATCAGGATGTTAACTGCACAGAAGTC | 23422 |
| gb:MT027062 | Organism:Severe | GGAACAAATACTTCTAACCAGGTTGCTGTTCTTTATCAGGATGTTAACTGCACAGAAGTC | 23422 |
| gb:MT019529 | Organism:Severe | GGAACAAATACTTCTAACCAGGTTGCTGTTCTTTATCAGGATGTTAACTGCACAGAAGTC | 23422 |
| gb:MN996529 | Organism:Severe | GGAACAAATACTTCTAACCAGGTTGCTGTTCTTTATCAGGATGTTAACTGCACAGAAGTC | 23410 |
| gb:MN996531 | Organism:Severe | GGAACAAATACTTCTAACCAGGTTGCTGTTCTTTATCAGGATGTTAACTGCACAGAAGTC | 23409 |
| gb:MT066176 | Organism:Severe | GGAACAAATACTTCTAACCAGGTTGCTGTTCTTTATCAGGATGTTAACTGCACAGAAGTC | 23422 |
| gb:MT027064 | Organism:Severe | GGAACAAATACTTCTAACCAGGTTGCTGTTCTTTATCAGGATGTTAACTGCACAGAAGTC | 23422 |
| gb:MN994468 | Organism:Severe | GGAACAAATACTTCTAACCAGGTTGCTGTTCTTTATCAGGATGTTAACTGCACAGAAGTC | 23422 |
| gb:MT072688 | Organism:Severe | GGAACAAATACTTCTAACCAGGTTGCTGTTCTTTATCAGGATGTTAACTGCACAGAAGTC | 23407 |
| gb:MN996527 | Organism:Severe | GGAACAAATACTTCTAACCAGGTTGCTGTTCTTTATCAGGATGTTAACTGCACAGAAGTC | 23389 |
| gb:MT093631 | Organism:Severe | GGAACAAATACTTCTAACCAGGTTGCTGTTCTTTATCAGGATGTTAACTGCACAGAAGTC | 23460 |
| gb:MT106053 | Organism:Severe | GGAACAAATACTTCTAACCAGGTTGCTGTTCTTTATCAGGATGTTAACTGCACAGAAGTC | 23422 |
| gb:MT019533 | Organism:Severe | GGAACAAATACTTCTAACCAGGTTGCTGTTCTTTATCAGGATGTTAACTGCACAGAAGTC | 23422 |
| gb:MT019531 | Organism:Severe | GGAACAAATACTTCTAACCAGGTTGCTGTTCTTTATCAGGATGTTAACTGCACAGAAGTC | 23422 |
| gb:MN996528 | Organism:Severe | GGAACAAATACTTCTAACCAGGTTGCTGTTCTTTATCAGGATGTTAACTGCACAGAAGTC | 23422 |
| gb:MN996530 | Organism:Severe | GGAACAAATACTTCTAACCAGGTTGCTGTTCTTTATCAGGATGTTAACTGCACAGAAGTC | 23408 |
| gb:MN908947 | Organism:Severe | GGAACAAATACTTCTAACCAGGTTGCTGTTCTTTATCAGGATGTTAACTGCACAGAAGTC | 23422 |
| gb:MT019532 | Organism:Severe | GGAACAAATACTTCTAACCAGGTTGCTGTTCTTTATCAGGATGTTAACTGCACAGAAGTC | 23422 |

\*\*\*\*\*

|             |                 |                                                              |       |
|-------------|-----------------|--------------------------------------------------------------|-------|
| gb:MT020781 | Organism:Severe | CCTGTTGCTATTCATGCAGATCAACTTACTCCTACTTGGCGTGTATTATTCTACAGTTCT | 23470 |
| gb:MT007544 | Organism:Severe | CCTGTTGCTATTCATGCAGATCAACTTACTCCTACTTGGCGTGTATTATTCTACAGTTCT | 23482 |
| gb:MN994467 | Organism:Severe | CCTGTTGCTATTCATGCAGATCAACTTACTCCTACTTGGCGTGTATTATTCTACAGTTCT | 23482 |
| gb:MT044257 | Organism:Severe | CCTGTTGCTATTCATGCAGATCAACTTACTCCTACTTGGCGTGTATTATTCTACAGTTCT | 23482 |
| gb:MT106054 | Organism:Severe | CCTGTTGCTATTCATGCAGATCAACTTACTCCTACTTGGCGTGTATTATTCTACAGTTCT | 23482 |
| gb:MT049951 | Organism:Severe | CCTGTTGCTATTCATGCAGATCAACTTACTCCTACTTGGCGTGTATTATTCTACAGTTCT | 23482 |
| gb:MN975262 | Organism:Severe | CCTGTTGCTATTCATGCAGATCAACTTACTCCTACTTGGCGTGTATTATTCTACAGTTCT | 23482 |
| gb:MT106052 | Organism:Severe | CCTGTTGCTATTCATGCAGATCAACTTACTCCTACTTGGCGTGTATTATTCTACAGTTCT | 23482 |
| gb:LC522975 | Organism:Severe | CCTGTTGCTATTCATGCAGATCAACTTACTCCTACTTGGCGTGTATTATTCTACAGTTCT | 23479 |
| gb:LC522973 | Organism:Severe | CCTGTTGCTATTCATGCAGATCAACTTACTCCTACTTGGCGTGTATTATTCTACAGTTCT | 23479 |
| gb:LC522974 | Organism:Severe | CCTGTTGCTATTCATGCAGATCAACTTACTCCTACTTGGCGTGTATTATTCTACAGTTCT | 23479 |
| gb:MN985325 | Organism:Severe | CCTGTTGCTATTCATGCAGATCAACTTACTCCTACTTGGCGTGTATTATTCTACAGTTCT | 23482 |
| gb:MT020881 | Organism:Severe | CCTGTTGCTATTCATGCAGATCAACTTACTCCTACTTGGCGTGTATTATTCTACAGTTCT | 23482 |
| gb:MT020880 | Organism:Severe | CCTGTTGCTATTCATGCAGATCAACTTACTCCTACTTGGCGTGTATTATTCTACAGTTCT | 23482 |
| gb:MT066175 | Organism:Severe | CCTGTTGCTATTCATGCAGATCAACTTACTCCTACTTGGCGTGTATTATTCTACAGTTCT | 23482 |



|             |                 |                                                             |       |
|-------------|-----------------|-------------------------------------------------------------|-------|
| gb:MT072688 | Organism:Severe | AATGTTTTCAAACACGTGCAGGCTGTTAATAGGGGCTGAACATGTCAACAACATCATAT | 23527 |
| gb:MN996527 | Organism:Severe | AATGTTTTCAAACACGTGCAGGCTGTTAATAGGGGCTGAACATGTCAACAACATCATAT | 23509 |
| gb:MT093631 | Organism:Severe | AATGTTTTCAAACACGTGCAGGCTGTTAATAGGGGCTGAACATGTCAACAACATCATAT | 23580 |
| gb:MT106053 | Organism:Severe | AATGTTTTCAAACACGTGCAGGCTGTTAATAGGGGCTGAACATGTCAACAACATCATAT | 23542 |
| gb:MT019533 | Organism:Severe | AATGTTTTCAAACACGTGCAGGCTGTTAATAGGGGCTGAACATGTCAACAACATCATAT | 23542 |
| gb:MT019531 | Organism:Severe | AATGTTTTCAAACACGTGCAGGCTGTTAATAGGGGCTGAACATGTCAACAACATCATAT | 23542 |
| gb:MN996528 | Organism:Severe | AATGTTTTCAAACACGTGCAGGCTGTTAATAGGGGCTGAACATGTCAACAACATCATAT | 23542 |
| gb:MN996530 | Organism:Severe | AATGTTTTCAAACACGTGCAGGCTGTTAATAGGGGCTGAACATGTCAACAACATCATAT | 23528 |
| gb:MN908947 | Organism:Severe | AATGTTTTCAAACACGTGCAGGCTGTTAATAGGGGCTGAACATGTCAACAACATCATAT | 23542 |
| gb:MT019532 | Organism:Severe | AATGTTTTCAAACACGTGCAGGCTGTTAATAGGGGCTGAACATGTCAACAACATCATAT | 23542 |

\*\*\*\*\*

|             |                 |                                                              |       |
|-------------|-----------------|--------------------------------------------------------------|-------|
| gb:MT020781 | Organism:Severe | GAGTGTGACATACCCATTGGTGCAGGTATATGCGCTAGTTATCAGACTCAGACTAATTCT | 23590 |
| gb:MT007544 | Organism:Severe | GAGTGTGACATACCCATTGGTGCAGGTATATGCGCTAGTTATCAGACTCAGACTAATTCT | 23602 |
| gb:MN994467 | Organism:Severe | GAGTGTGACATACCCATTGGTGCAGGTATATGCGCTAGTTATCAGACTCAGACTAATTCT | 23602 |
| gb:MT044257 | Organism:Severe | GAGTGTGACATACCCATTGGTGCAGGTATATGCGCTAGTTATCAGACTCAGACTAATTCT | 23602 |
| gb:MT106054 | Organism:Severe | GAGTGTGACATACCCATTGGTGCAGGTATATGCGCTAGTTATCAGACTCAGACTAATTCT | 23602 |
| gb:MT049951 | Organism:Severe | GAGTGTGACATACCCATTGGTGCAGGTATATGCGCTAGTTATCAGACTCAGACTAATTCT | 23602 |
| gb:MN975262 | Organism:Severe | GAGTGTGACATACCCATTGGTGCAGGTATATGCGCTAGTTATCAGACTCAGACTAATTCT | 23602 |
| gb:MT106052 | Organism:Severe | GAGTGTGACATACCCATTGGTGCAGGTATATGCGCTAGTTATCAGACTCAGACTAATTCT | 23602 |
| gb:LC522975 | Organism:Severe | GAGTGTGACATACCCATTGGTGCAGGTATATGCGCTAGTTATCAGACTCAGACTAATTCT | 23599 |
| gb:LC522973 | Organism:Severe | GAGTGTGACATACCCATTGGTGCAGGTATATGCGCTAGTTATCAGACTCAGACTAATTCT | 23599 |
| gb:LC522974 | Organism:Severe | GAGTGTGACATACCCATTGGTGCAGGTATATGCGCTAGTTATCAGACTCAGACTAATTCT | 23599 |
| gb:MN985325 | Organism:Severe | GAGTGTGACATACCCATTGGTGCAGGTATATGCGCTAGTTATCAGACTCAGACTAATTCT | 23602 |
| gb:MT020881 | Organism:Severe | GAGTGTGACATACCCATTGGTGCAGGTATATGCGCTAGTTATCAGACTCAGACTAATTCT | 23602 |
| gb:MT020880 | Organism:Severe | GAGTGTGACATACCCATTGGTGCAGGTATATGCGCTAGTTATCAGACTCAGACTAATTCT | 23602 |
| gb:MT066175 | Organism:Severe | GAGTGTGACATACCCATTGGTGCAGGTATATGCGCTAGTTATCAGACTCAGACTAATTCT | 23602 |
| gb:MN997409 | Organism:Severe | GAGTGTGACATACCCATTGGTGCAGGTATATGCGCTAGTTATCAGACTCAGACTAATTCT | 23602 |
| gb:MN938384 | Organism:Severe | GAGTGTGACATACCCATTGGTGCAGGTATATGCGCTAGTTATCAGACTCAGACTAATTCT | 23570 |
| gb:MT044258 | Organism:Severe | GAGTGTGACATACCCATTGGTGCAGGTATATGCGCTAGTTATCAGACTCAGACTAATTCT | 23578 |
| gb:MT039890 | Organism:Severe | GAGTGTGACATACCCATTGGTGCAGGTATATGCGCTAGTTATCAGACTCAGACTAATTCT | 23602 |
| gb:MN988713 | Organism:Severe | GAGTGTGACATACCCATTGGTGCAGGTATATGCGCTAGTTATCAGACTCAGACTAATTCT | 23602 |
| gb:LC521925 | Organism:Severe | GAGTGTGACATACCCATTGGTGCAGGTATATGCGCTAGTTATCAGACTCAGACTAATTCT | 23575 |
| gb:MT093571 | Organism:Severe | GAGTGTGACATACCCATTGGTGCAGGTATATGCGCTAGTTATCAGACTCAGACTAATTCT | 23602 |
| gb:MT039887 | Organism:Severe | GAGTGTGACATACCCATTGGTGCAGGTATATGCGCTAGTTATCAGACTCAGACTAATTCT | 23599 |
| gb:MT019530 | Organism:Severe | GAGTGTGACATACCCATTGGTGCAGGTATATGCGCTAGTTATCAGACTCAGACTAATTCT | 23602 |
| gb:MT039888 | Organism:Severe | GAGTGTGACATACCCATTGGTGCAGGTATATGCGCTAGTTATCAGACTCAGACTAATTCT | 23602 |
| gb:LC522972 | Organism:Severe | GAGTGTGACATACCCATTGGTGCAGGTATATGCGCTAGTTATCAGACTCAGACTAATTCT | 23599 |
| gb:MT027063 | Organism:Severe | GAGTGTGACATACCCATTGGTGCAGGTATATGCGCTAGTTATCAGACTCAGACTAATTCT | 23602 |
| gb:MT027062 | Organism:Severe | GAGTGTGACATACCCATTGGTGCAGGTATATGCGCTAGTTATCAGACTCAGACTAATTCT | 23602 |
| gb:MT019529 | Organism:Severe | GAGTGTGACATACCCATTGGTGCAGGTATATGCGCTAGTTATCAGACTCAGACTAATTCT | 23602 |
| gb:MN996529 | Organism:Severe | GAGTGTGACATACCCATTGGTGCAGGTATATGCGCTAGTTATCAGACTCAGACTAATTCT | 23590 |
| gb:MN996531 | Organism:Severe | GAGTGTGACATACCCATTGGTGCAGGTATATGCGCTAGTTATCAGACTCAGACTAATTCT | 23589 |
| gb:MT066176 | Organism:Severe | GAGTGTGACATACCCATTGGTGCAGGTATATGCGCTAGTTATCAGACTCAGACTAATTCT | 23602 |
| gb:MT027064 | Organism:Severe | GAGTGTGACATACCCATTGGTGCAGGTATATGCGCTAGTTATCAGACTCAGACTAATTCT | 23602 |
| gb:MN994468 | Organism:Severe | GAGTGTGACATACCCATTGGTGCAGGTATATGCGCTAGTTATCAGACTCAGACTAATTCT | 23602 |
| gb:MT072688 | Organism:Severe | GAGTGTGACATACCCATTGGTGCAGGTATATGCGCTAGTTATCAGACTCAGACTAATTCT | 23587 |
| gb:MN996527 | Organism:Severe | GAGTGTGACATACCCATTGGTGCAGGTATATGCGCTAGTTATCAGACTCAGACTAATTCT | 23569 |
| gb:MT093631 | Organism:Severe | GAGTGTGACATACCCATTGGTGCAGGTATATGCGCTAGTTATCAGACTCAGACTAATTCT | 23640 |
| gb:MT106053 | Organism:Severe | GAGTGTGACATACCCATTGGTGCAGGTATATGCGCTAGTTATCAGACTCAGACTAATTCT | 23602 |
| gb:MT019533 | Organism:Severe | GAGTGTGACATACCCATTGGTGCAGGTATATGCGCTAGTTATCAGACTCAGACTAATTCT | 23602 |
| gb:MT019531 | Organism:Severe | GAGTGTGACATACCCATTGGTGCAGGTATATGCGCTAGTTATCAGACTCAGACTAATTCT | 23602 |
| gb:MN996528 | Organism:Severe | GAGTGTGACATACCCATTGGTGCAGGTATATGCGCTAGTTATCAGACTCAGACTAATTCT | 23602 |
| gb:MN996530 | Organism:Severe | GAGTGTGACATACCCATTGGTGCAGGTATATGCGCTAGTTATCAGACTCAGACTAATTCT | 23588 |
| gb:MN908947 | Organism:Severe | GAGTGTGACATACCCATTGGTGCAGGTATATGCGCTAGTTATCAGACTCAGACTAATTCT | 23602 |
| gb:MT019532 | Organism:Severe | GAGTGTGACATACCCATTGGTGCAGGTATATGCGCTAGTTATCAGACTCAGACTAATTCT | 23602 |

\*\*\*\*\*

|             |                 |                                                              |       |
|-------------|-----------------|--------------------------------------------------------------|-------|
| gb:MT020781 | Organism:Severe | CCTCGGCGGGCACGTAGTGTAGCTAGTCAATCCATCATTGCCTACACTATGTCACCTGGT | 23650 |
| gb:MT007544 | Organism:Severe | CCTCGGCGGGCACGTAGTGTAGCTAGTCAATCCATCATTGCCTACACTATGTCACCTGGT | 23662 |
| gb:MN994467 | Organism:Severe | CCTCGGCGGGCACGTAGTGTAGCTAGTCAATCCATCATTGCCTACACTATGTCACCTGGT | 23662 |
| gb:MT044257 | Organism:Severe | CCTCGGCGGGCACGTAGTGTAGCTAGTCAATCCATCATTGCCTACACTATGTCACCTGGT | 23662 |
| gb:MT106054 | Organism:Severe | CCTCGGCGGGCACGTAGTGTAGCTAGTCAATCCATCATTGCCTACACTATGTCACCTGGT | 23662 |
| gb:MT049951 | Organism:Severe | CCTCGGCGGGCACGTAGTGTAGCTAGTCAATCCATCATTGCCTACACTATGTCACCTGGT | 23662 |
| gb:MN975262 | Organism:Severe | CCTCGGCGGGCACGTAGTGTAGCTAGTCAATCCATCATTGCCTACACTATGTCACCTGGT | 23662 |





|             |                 |                                                               |       |
|-------------|-----------------|---------------------------------------------------------------|-------|
| gb:MT027063 | Organism:Severe | GCAGAAAATTCAGTTGCTTACTCTAATAACTCTATTGCCATACCCACAAAATTTTACTATT | 23722 |
| gb:MT027062 | Organism:Severe | GCAGAAAATTCAGTTGCTTACTCTAATAACTCTATTGCCATACCCACAAAATTTTACTATT | 23722 |
| gb:MT019529 | Organism:Severe | GCAGAAAATTCAGTTGCTTACTCTAATAACTCTATTGCCATACCCACAAAATTTTACTATT | 23722 |
| gb:MN996529 | Organism:Severe | GCAGAAAATTCAGTTGCTTACTCTAATAACTCTATTGCCATACCCACAAAATTTTACTATT | 23710 |
| gb:MN996531 | Organism:Severe | GCAGAAAATTCAGTTGCTTACTCTAATAACTCTATTGCCATACCCACAAAATTTTACTATT | 23709 |
| gb:MT066176 | Organism:Severe | GCAGAAAATTCAGTTGCTTACTCTAATAACTCTATTGCCATACCCACAAAATTTTACTATT | 23722 |
| gb:MT027064 | Organism:Severe | GCAGAAAATTCAGTTGCTTACTCTAATAACTCTATTGCCATACCCACAAAATTTTACTATT | 23722 |
| gb:MN994468 | Organism:Severe | GCAGAAAATTCAGTTGCTTACTCTAATAACTCTATTGCCATACCCACAAAATTTTACTATT | 23722 |
| gb:MT072688 | Organism:Severe | GCAGAAAATTCAGTTGCTTACTCTAATAACTCTATTGCCATACCCACAAAATTTTACTATT | 23707 |
| gb:MN996527 | Organism:Severe | GCAGAAAATTCAGTTGCTTACTCTAATAACTCTATTGCCATACCCACAAAATTTTACTATT | 23689 |
| gb:MT093631 | Organism:Severe | GCAGAAAATTCAGTTGCTTACTCTAATAACTCTATTGCCATACCCACAAAATTTTACTATT | 23760 |
| gb:MT106053 | Organism:Severe | GCAGAAAATTCAGTTGCTTACTCTAATAACTCTATTGCCATACCCACAAAATTTTACTATT | 23722 |
| gb:MT019533 | Organism:Severe | GCAGAAAATTCAGTTGCTTACTCTAATAACTCTATTGCCATACCCACAAAATTTTACTATT | 23722 |
| gb:MT019531 | Organism:Severe | GCAGAAAATTCAGTTGCTTACTCTAATAACTCTATTGCCATACCCACAAAATTTTACTATT | 23722 |
| gb:MN996528 | Organism:Severe | GCAGAAAATTCAGTTGCTTACTCTAATAACTCTATTGCCATACCCACAAAATTTTACTATT | 23722 |
| gb:MN996530 | Organism:Severe | GCAGAAAATTCAGTTGCTTACTCTAATAACTCTATTGCCATACCCACAAAATTTTACTATT | 23708 |
| gb:MN908947 | Organism:Severe | GCAGAAAATTCAGTTGCTTACTCTAATAACTCTATTGCCATACCCACAAAATTTTACTATT | 23722 |
| gb:MT019532 | Organism:Severe | GCAGAAAATTCAGTTGCTTACTCTAATAACTCTATTGCCATACCCACAAAATTTTACTATT | 23722 |

\*\*\*\*\*

|             |                 |                                                             |       |
|-------------|-----------------|-------------------------------------------------------------|-------|
| gb:MT020781 | Organism:Severe | AGTGTTACCACAGAAATTCACCAGTGTCTATGACCAAGACATCAGTAGATTGTACAATG | 23770 |
| gb:MT007544 | Organism:Severe | AGTGTTACCACAGAAATTCACCAGTGTCTATGACCAAGACATCAGTAGATTGTACAATG | 23782 |
| gb:MN994467 | Organism:Severe | AGTGTTACCACAGAAATTCACCAGTGTCTATGACCAAGACATCAGTAGATTGTACAATG | 23782 |
| gb:MT044257 | Organism:Severe | AGTGTTACCACAGAAATTCACCAGTGTCTATGACCAAGACATCAGTAGATTGTACAATG | 23782 |
| gb:MT106054 | Organism:Severe | AGTGTTACCACAGAAATTCACCAGTGTCTATGACCAAGACATCAGTAGATTGTACAATG | 23782 |
| gb:MT049951 | Organism:Severe | AGTGTTACCACAGAAATTCACCAGTGTCTATGACCAAGACATCAGTAGATTGTACAATG | 23782 |
| gb:MN975262 | Organism:Severe | AGTGTTACCACAGAAATTCACCAGTGTCTATGACCAAGACATCAGTAGATTGTACAATG | 23782 |
| gb:MT106052 | Organism:Severe | AGTGTTACCACAGAAATTCACCAGTGTCTATGACCAAGACATCAGTAGATTGTACAATG | 23782 |
| gb:LC522975 | Organism:Severe | AGTGTTACCACAGAAATTCACCAGTGTCTATGACCAAGACATCAGTAGATTGTACAATG | 23779 |
| gb:LC522973 | Organism:Severe | AGTGTTACCACAGAAATTCACCAGTGTCTATGACCAAGACATCAGTAGATTGTACAATG | 23779 |
| gb:LC522974 | Organism:Severe | AGTGTTACCACAGAAATTCACCAGTGTCTATGACCAAGACATCAGTAGATTGTACAATG | 23779 |
| gb:MN985325 | Organism:Severe | AGTGTTACCACAGAAATTCACCAGTGTCTATGACCAAGACATCAGTAGATTGTACAATG | 23782 |
| gb:MT020881 | Organism:Severe | AGTGTTACCACAGAAATTCACCAGTGTCTATGACCAAGACATCAGTAGATTGTACAATG | 23782 |
| gb:MT020880 | Organism:Severe | AGTGTTACCACAGAAATTCACCAGTGTCTATGACCAAGACATCAGTAGATTGTACAATG | 23782 |
| gb:MT066175 | Organism:Severe | AGTGTTACCACAGAAATTCACCAGTGTCTATGACCAAGACATCAGTAGATTGTACAATG | 23782 |
| gb:MN997409 | Organism:Severe | AGTGTTACCACAGAAATTCACCAGTGTCTATGACCAAGACATCAGTAGATTGTACAATG | 23782 |
| gb:MN938384 | Organism:Severe | AGTGTTACCACAGAAATTCACCAGTGTCTATGACCAAGACATCAGTAGATTGTACAATG | 23750 |
| gb:MT044258 | Organism:Severe | AGTGTTACCACAGAAATTCACCAGTGTCTATGACCAAGACATCAGTAGATTGTACAATG | 23758 |
| gb:MT039890 | Organism:Severe | AGTGTTACCACAGAAATTCACCAGTGTCTATGACCAAGACATCAGTAGATTGTACAATG | 23782 |
| gb:MN988713 | Organism:Severe | AGTGTTACCACAGAAATTCACCAGTGTCTATGACCAAGACATCAGTAGATTGTACAATG | 23782 |
| gb:LC521925 | Organism:Severe | AGTGTTACCACAGAAATTCACCAGTGTCTATGACCAAGACATCAGTAGATTGTACAATG | 23755 |
| gb:MT093571 | Organism:Severe | AGTGTTACCACAGAAATTCACCAGTGTCTATGACCAAGACATCAGTAGATTGTACAATG | 23782 |
| gb:MT039887 | Organism:Severe | AGTGTTACCACAGAAATTCACCAGTGTCTATGACCAAGACATCAGTAGATTGTACAATG | 23779 |
| gb:MT019530 | Organism:Severe | AGTGTTACCACAGAAATTCACCAGTGTCTATGACCAAGACATCAGTAGATTGTACAATG | 23782 |
| gb:MT039888 | Organism:Severe | AGTGTTACCACAGAAATTCACCAGTGTCTATGACCAAGACATCAGTAGATTGTACAATG | 23782 |
| gb:LC522972 | Organism:Severe | AGTGTTACCACAGAAATTCACCAGTGTCTATGACCAAGACATCAGTAGATTGTACAATG | 23779 |
| gb:MT027063 | Organism:Severe | AGTGTTACCACAGAAATTCACCAGTGTCTATGACCAAGACATCAGTAGATTGTACAATG | 23782 |
| gb:MT027062 | Organism:Severe | AGTGTTACCACAGAAATTCACCAGTGTCTATGACCAAGACATCAGTAGATTGTACAATG | 23782 |
| gb:MT019529 | Organism:Severe | AGTGTTACCACAGAAATTCACCAGTGTCTATGACCAAGACATCAGTAGATTGTACAATG | 23782 |
| gb:MN996529 | Organism:Severe | AGTGTTACCACAGAAATTCACCAGTGTCTATGACCAAGACATCAGTAGATTGTACAATG | 23770 |
| gb:MN996531 | Organism:Severe | AGTGTTACCACAGAAATTCACCAGTGTCTATGACCAAGACATCAGTAGATTGTACAATG | 23769 |
| gb:MT066176 | Organism:Severe | AGTGTTACCACAGAAATTCACCAGTGTCTATGACCAAGACATCAGTAGATTGTACAATG | 23782 |
| gb:MT027064 | Organism:Severe | AGTGTTACCACAGAAATTCACCAGTGTCTATGACCAAGACATCAGTAGATTGTACAATG | 23782 |
| gb:MN994468 | Organism:Severe | AGTGTTACCACAGAAATTCACCAGTGTCTATGACCAAGACATCAGTAGATTGTACAATG | 23782 |
| gb:MT072688 | Organism:Severe | AGTGTTACCACAGAAATTCACCAGTGTCTATGACCAAGACATCAGTAGATTGTACAATG | 23767 |
| gb:MN996527 | Organism:Severe | AGTGTTACCACAGAAATTCACCAGTGTCTATGACCAAGACATCAGTAGATTGTACAATG | 23749 |
| gb:MT093631 | Organism:Severe | AGTGTTACCACAGAAATTCACCAGTGTCTATGACCAAGACATCAGTAGATTGTACAATG | 23820 |
| gb:MT106053 | Organism:Severe | AGTGTTACCACAGAAATTCACCAGTGTCTATGACCAAGACATCAGTAGATTGTACAATG | 23782 |
| gb:MT019533 | Organism:Severe | AGTGTTACCACAGAAATTCACCAGTGTCTATGACCAAGACATCAGTAGATTGTACAATG | 23782 |
| gb:MT019531 | Organism:Severe | AGTGTTACCACAGAAATTCACCAGTGTCTATGACCAAGACATCAGTAGATTGTACAATG | 23782 |
| gb:MN996528 | Organism:Severe | AGTGTTACCACAGAAATTCACCAGTGTCTATGACCAAGACATCAGTAGATTGTACAATG | 23782 |
| gb:MN996530 | Organism:Severe | AGTGTTACCACAGAAATTCACCAGTGTCTATGACCAAGACATCAGTAGATTGTACAATG | 23768 |
| gb:MN908947 | Organism:Severe | AGTGTTACCACAGAAATTCACCAGTGTCTATGACCAAGACATCAGTAGATTGTACAATG | 23782 |
| gb:MT019532 | Organism:Severe | AGTGTTACCACAGAAATTCACCAGTGTCTATGACCAAGACATCAGTAGATTGTACAATG | 23782 |

\*\*\*\*\*



|             |                 |                                                             |       |
|-------------|-----------------|-------------------------------------------------------------|-------|
| gb:MT039890 | Organism:Severe | ACACAATTAACCGTGCTTTAACTGGAATAGCTGTTGAACAAGACAAAAACACCCAAGAA | 23902 |
| gb:MN988713 | Organism:Severe | ACACAATTAACCGTGCTTTAACTGGAATAGCTGTTGAACAAGACAAAAACACCCAAGAA | 23902 |
| gb:LC521925 | Organism:Severe | ACACAATTAACCGTGCTTTAACTGGAATAGCTGTTGAACAAGACAAAAACACCCAAGAA | 23875 |
| gb:MT093571 | Organism:Severe | ACACAATTAACCGTGCTTTAACTGGAATAGCTGTTGAACAAGACAAAAACACCCAAGAA | 23902 |
| gb:MT039887 | Organism:Severe | ACACAATTAACCGTGCTTTAACTGGAATAGCTGTTGAACAAGACAAAAACACCCAAGAA | 23899 |
| gb:MT019530 | Organism:Severe | ACACAATTAACCGTGCTTTAACTGGAATAGCTGTTGAACAAGACAAAAACACCCAAGAA | 23902 |
| gb:MT039888 | Organism:Severe | ACACAATTAACCGTGCTTTAACTGGAATAGCTGTTGAACAAGACAAAAACACCCAAGAA | 23902 |
| gb:LC522972 | Organism:Severe | ACACAATTAACCGTGCTTTAACTGGAATAGCTGTTGAACAAGACAAAAACACCCAAGAA | 23899 |
| gb:MT027063 | Organism:Severe | ACACAATTAACCGTGCTTTAACTGGAATAGCTGTTGAACAAGACAAAAACACCCAAGAA | 23902 |
| gb:MT027062 | Organism:Severe | ACACAATTAACCGTGCTTTAACTGGAATAGCTGTTGAACAAGACAAAAACACCCAAGAA | 23902 |
| gb:MT019529 | Organism:Severe | ACACAATTAACCGTGCTTTAACTGGAATAGCTGTTGAACAAGACAAAAACACCCAAGAA | 23902 |
| gb:MN996529 | Organism:Severe | ACACAATTAACCGTGCTTTAACTGGAATAGCTGTTGAACAAGACAAAAACACCCAAGAA | 23890 |
| gb:MN996531 | Organism:Severe | ACACAATTAACCGTGCTTTAACTGGAATAGCTGTTGAACAAGACAAAAACACCCAAGAA | 23889 |
| gb:MT066176 | Organism:Severe | ACACAATTAACCGTGCTTTAACTGGAATAGCTGTTGAACAAGACAAAAACACCCAAGAA | 23902 |
| gb:MT027064 | Organism:Severe | ACACAATTAACCGTGCTTTAACTGGAATAGCTGTTGAACAAGACAAAAACACCCAAGAA | 23902 |
| gb:MN994468 | Organism:Severe | ACACAATTAACCGTGCTTTAACTGGAATAGCTGTTGAACAAGACAAAAACACCCAAGAA | 23902 |
| gb:MT072688 | Organism:Severe | ACACAATTAACCGTGCTTTAACTGGAATAGCTGTTGAACAAGACAAAAACACCCAAGAA | 23887 |
| gb:MN996527 | Organism:Severe | ACACAATTAACCGTGCTTTAACTGGAATAGCTGTTGAACAAGACAAAAACACCCAAGAA | 23869 |
| gb:MT093631 | Organism:Severe | ACACAATTAACCGTGCTTTAACTGGAATAGCTGTTGAACAAGACAAAAACACCCAAGAA | 23940 |
| gb:MT106053 | Organism:Severe | ACACAATTAACCGTGCTTTAACTGGAATAGCTGTTGAACAAGACAAAAACACCCAAGAA | 23902 |
| gb:MT019533 | Organism:Severe | ACACAATTAACCGTGCTTTAACTGGAATAGCTGTTGAACAAGACAAAAACACCCAAGAA | 23902 |
| gb:MT019531 | Organism:Severe | ACACAATTAACCGTGCTTTAACTGGAATAGCTGTTGAACAAGACAAAAACACCCAAGAA | 23902 |
| gb:MN996528 | Organism:Severe | ACACAATTAACCGTGCTTTAACTGGAATAGCTGTTGAACAAGACAAAAACACCCAAGAA | 23902 |
| gb:MN996530 | Organism:Severe | ACACAATTAACCGTGCTTTAACTGGAATAGCTGTTGAACAAGACAAAAACACCCAAGAA | 23888 |
| gb:MN908947 | Organism:Severe | ACACAATTAACCGTGCTTTAACTGGAATAGCTGTTGAACAAGACAAAAACACCCAAGAA | 23902 |
| gb:MT019532 | Organism:Severe | ACACAATTAACCGTGCTTTAACTGGAATAGCTGTTGAACAAGACAAAAACACCCAAGAA | 23902 |

\*\*\*\*\*

|             |                 |                                                           |       |
|-------------|-----------------|-----------------------------------------------------------|-------|
| gb:MT020781 | Organism:Severe | GTTTTTGACAAGTCAAACAAATTTACAAAACACCACCAATTAAGATTTGGTGGTTTT | 23950 |
| gb:MT007544 | Organism:Severe | GTTTTTGACAAGTCAAACAAATTTACAAAACACCACCAATTAAGATTTGGTGGTTTT | 23962 |
| gb:MN994467 | Organism:Severe | GTTTTTGACAAGTCAAACAAATTTACAAAACACCACCAATTAAGATTTGGTGGTTTT | 23962 |
| gb:MT044257 | Organism:Severe | GTTTTTGACAAGTCAAACAAATTTACAAAACACCACCAATTAAGATTTGGTGGTTTT | 23962 |
| gb:MT106054 | Organism:Severe | GTTTTTGACAAGTCAAACAAATTTACAAAACACCACCAATTAAGATTTGGTGGTTTT | 23962 |
| gb:MT049951 | Organism:Severe | GTTTTTGACAAGTCAAACAAATTTACAAAACACCACCAATTAAGATTTGGTGGTTTT | 23962 |
| gb:MN975262 | Organism:Severe | GTTTTTGACAAGTCAAACAAATTTACAAAACACCACCAATTAAGATTTGGTGGTTTT | 23962 |
| gb:MT106052 | Organism:Severe | GTTTTTGACAAGTCAAACAAATTTACAAAACACCACCAATTAAGATTTGGTGGTTTT | 23962 |
| gb:LC522975 | Organism:Severe | GTTTTTGACAAGTCAAACAAATTTACAAAACACCACCAATTAAGATTTGGTGGTTTT | 23959 |
| gb:LC522973 | Organism:Severe | GTTTTTGACAAGTCAAACAAATTTACAAAACACCACCAATTAAGATTTGGTGGTTTT | 23959 |
| gb:LC522974 | Organism:Severe | GTTTTTGACAAGTCAAACAAATTTACAAAACACCACCAATTAAGATTTGGTGGTTTT | 23959 |
| gb:MN985325 | Organism:Severe | GTTTTTGACAAGTCAAACAAATTTACAAAACACCACCAATTAAGATTTGGTGGTTTT | 23962 |
| gb:MT020881 | Organism:Severe | GTTTTTGACAAGTCAAACAAATTTACAAAACACCACCAATTAAGATTTGGTGGTTTT | 23962 |
| gb:MT020880 | Organism:Severe | GTTTTTGACAAGTCAAACAAATTTACAAAACACCACCAATTAAGATTTGGTGGTTTT | 23962 |
| gb:MT066175 | Organism:Severe | GTTTTTGACAAGTCAAACAAATTTACAAAACACCACCAATTAAGATTTGGTGGTTTT | 23962 |
| gb:MN997409 | Organism:Severe | GTTTTTGACAAGTCAAACAAATTTACAAAACACCACCAATTAAGATTTGGTGGTTTT | 23962 |
| gb:MN938384 | Organism:Severe | GTTTTTGACAAGTCAAACAAATTTACAAAACACCACCAATTAAGATTTGGTGGTTTT | 23930 |
| gb:MT044258 | Organism:Severe | GTTTTTGACAAGTCAAACAAATTTACAAAACACCACCAATTAAGATTTGGTGGTTTT | 23938 |
| gb:MT039890 | Organism:Severe | GTTTTTGACAAGTCAAACAAATTTACAAAACACCACCAATTAAGATTTGGTGGTTTT | 23962 |
| gb:MN988713 | Organism:Severe | GTTTTTGACAAGTCAAACAAATTTACAAAACACCACCAATTAAGATTTGGTGGTTTT | 23962 |
| gb:LC521925 | Organism:Severe | GTTTTTGACAAGTCAAACAAATTTACAAAACACCACCAATTAAGATTTGGTGGTTTT | 23935 |
| gb:MT093571 | Organism:Severe | GTTTTTGACAAGTCAAACAAATTTACAAAACACCACCAATTAAGATTTGGTGGTTTT | 23962 |
| gb:MT039887 | Organism:Severe | GTTTTTGACAAGTCAAACAAATTTACAAAACACCACCAATTAAGATTTGGTGGTTTT | 23959 |
| gb:MT019530 | Organism:Severe | GTTTTTGACAAGTCAAACAAATTTACAAAACACCACCAATTAAGATTTGGTGGTTTT | 23962 |
| gb:MT039888 | Organism:Severe | GTTTTTGACAAGTCAAACAAATTTACAAAACACCACCAATTAAGATTTGGTGGTTTT | 23962 |
| gb:LC522972 | Organism:Severe | GTTTTTGACAAGTCAAACAAATTTACAAAACACCACCAATTAAGATTTGGTGGTTTT | 23959 |
| gb:MT027063 | Organism:Severe | GTTTTTGACAAGTCAAACAAATTTACAAAACACCACCAATTAAGATTTGGTGGTTTT | 23962 |
| gb:MT027062 | Organism:Severe | GTTTTTGACAAGTCAAACAAATTTACAAAACACCACCAATTAAGATTTGGTGGTTTT | 23962 |
| gb:MT019529 | Organism:Severe | GTTTTTGACAAGTCAAACAAATTTACAAAACACCACCAATTAAGATTTGGTGGTTTT | 23962 |
| gb:MN996529 | Organism:Severe | GTTTTTGACAAGTCAAACAAATTTACAAAACACCACCAATTAAGATTTGGTGGTTTT | 23950 |
| gb:MN996531 | Organism:Severe | GTTTTTGACAAGTCAAACAAATTTACAAAACACCACCAATTAAGATTTGGTGGTTTT | 23949 |
| gb:MT066176 | Organism:Severe | GTTTTTGACAAGTCAAACAAATTTACAAAACACCACCAATTAAGATTTGGTGGTTTT | 23962 |
| gb:MT027064 | Organism:Severe | GTTTTTGACAAGTCAAACAAATTTACAAAACACCACCAATTAAGATTTGGTGGTTTT | 23962 |
| gb:MN994468 | Organism:Severe | GTTTTTGACAAGTCAAACAAATTTACAAAACACCACCAATTAAGATTTGGTGGTTTT | 23962 |
| gb:MT072688 | Organism:Severe | GTTTTTGACAAGTCAAACAAATTTACAAAACACCACCAATTAAGATTTGGTGGTTTT | 23947 |
| gb:MN996527 | Organism:Severe | GTTTTTGACAAGTCAAACAAATTTACAAAACACCACCAATTAAGATTTGGTGGTTTT | 23929 |
| gb:MT093631 | Organism:Severe | GTTTTTGACAAGTCAAACAAATTTACAAAACACCACCAATTAAGATTTGGTGGTTTT | 24000 |

|             |                 |                                                             |       |
|-------------|-----------------|-------------------------------------------------------------|-------|
| gb:MT106053 | Organism:Severe | GTTTTTGCACAAGTCAAACAAATTTACAAAACACCACCAATTAAGATTTTGGTGGTTTT | 23962 |
| gb:MT019533 | Organism:Severe | GTTTTTGCACAAGTCAAACAAATTTACAAAACACCACCAATTAAGATTTTGGTGGTTTT | 23962 |
| gb:MT019531 | Organism:Severe | GTTTTTGCACAAGTCAAACAAATTTACAAAACACCACCAATTAAGATTTTGGTGGTTTT | 23962 |
| gb:MN996528 | Organism:Severe | GTTTTTGCACAAGTCAAACAAATTTACAAAACACCACCAATTAAGATTTTGGTGGTTTT | 23962 |
| gb:MN996530 | Organism:Severe | GTTTTTGCACAAGTCAAACAAATTTACAAAACACCACCAATTAAGATTTTGGTGGTTTT | 23948 |
| gb:MN908947 | Organism:Severe | GTTTTTGCACAAGTCAAACAAATTTACAAAACACCACCAATTAAGATTTTGGTGGTTTT | 23962 |
| gb:MT019532 | Organism:Severe | GTTTTTGCACAAGTCAAACAAATTTACAAAACACCACCAATTAAGATTTTGGTGGTTTT | 23962 |

\*\*\*\*\*

|             |                 |                                                             |       |
|-------------|-----------------|-------------------------------------------------------------|-------|
| gb:MT020781 | Organism:Severe | AATTTTTCACAAATATTACCAGATCCATCAAACCAAGCAAGAGGTCATTTATTGAAGAT | 24010 |
| gb:MT007544 | Organism:Severe | AATTTTTCACAAATATTACCAGATCCATCAAACCAAGCAAGAGGTCATTTATTGAAGAT | 24022 |
| gb:MN994467 | Organism:Severe | AATTTTTCACAAATATTACCAGATCCATCAAACCAAGCAAGAGGTCATTTATTGAAGAT | 24022 |
| gb:MT044257 | Organism:Severe | AATTTTTCACAAATATTACCAGATCCATCAAACCAAGCAAGAGGTCATTTATTGAAGAT | 24022 |
| gb:MT106054 | Organism:Severe | AATTTTTCACAAATATTACCAGATCCATCAAACCAAGCAAGAGGTCATTTATTGAAGAT | 24022 |
| gb:MT049951 | Organism:Severe | AATTTTTCACAAATATTACCAGATCCATCAAACCAAGCAAGAGGTCATTTATTGAAGAT | 24022 |
| gb:MN975262 | Organism:Severe | AATTTTTCACAAATATTACCAGATCCATCAAACCAAGCAAGAGGTCATTTATTGAAGAT | 24022 |
| gb:MT106052 | Organism:Severe | AATTTTTCACAAATATTACCAGATCCATCAAACCAAGCAAGAGGTCATTTATTGAAGAT | 24022 |
| gb:LC522975 | Organism:Severe | AATTTTTCACAAATATTACCAGATCCATCAAACCAAGCAAGAGGTCATTTATTGAAGAT | 24019 |
| gb:LC522973 | Organism:Severe | AATTTTTCACAAATATTACCAGATCCATCAAACCAAGCAAGAGGTCATTTATTGAAGAT | 24019 |
| gb:LC522974 | Organism:Severe | AATTTTTCACAAATATTACCAGATCCATCAAACCAAGCAAGAGGTCATTTATTGAAGAT | 24019 |
| gb:MN985325 | Organism:Severe | AATTTTTCACAAATATTACCAGATCCATCAAACCAAGCAAGAGGTCATTTATTGAAGAT | 24022 |
| gb:MT020881 | Organism:Severe | AATTTTTCACAAATATTACCAGATCCATCAAACCAAGCAAGAGGTCATTTATTGAAGAT | 24022 |
| gb:MT020880 | Organism:Severe | AATTTTTCACAAATATTACCAGATCCATCAAACCAAGCAAGAGGTCATTTATTGAAGAT | 24022 |
| gb:MT066175 | Organism:Severe | AATTTTTCACAAATATTACCAGATCCATCAAACCAAGCAAGAGGTCATTTATTGAAGAT | 24022 |
| gb:MN997409 | Organism:Severe | AATTTTTCACAAATATTACCAGATCCATCAAACCAAGCAAGAGGTCATTTATTGAAGAT | 24022 |
| gb:MN938384 | Organism:Severe | AATTTTTCACAAATATTACCAGATCCATCAAACCAAGCAAGAGGTCATTTATTGAAGAT | 23990 |
| gb:MT044258 | Organism:Severe | AATTTTTCACAAATATTACCAGATCCATCAAACCAAGCAAGAGGTCATTTATTGAAGAT | 23998 |
| gb:MT039890 | Organism:Severe | AATTTTTCACAAATATTACCAGATCCATCAAACCAAGCAAGAGGTCATTTATTGAAGAT | 24022 |
| gb:MN988713 | Organism:Severe | AATTTTTCACAAATATTACCAGATCCATCAAACCAAGCAAGAGGTCATTTATTGAAGAT | 24022 |
| gb:LC521925 | Organism:Severe | AATTTTTCACAAATATTACCAGATCCATCAAACCAAGCAAGAGGTCATTTATTGAAGAT | 23995 |
| gb:MT093571 | Organism:Severe | AATTTTTCACAAATATTACCAGATCCATCAAACCAAGCAAGAGGTCATTTATTGAAGAT | 24022 |
| gb:MT039887 | Organism:Severe | AATTTTTCACAAATATTACCAGATCCATCAAACCAAGCAAGAGGTCATTTATTGAAGAT | 24019 |
| gb:MT019530 | Organism:Severe | AATTTTTCACAAATATTACCAGATCCATCAAACCAAGCAAGAGGTCATTTATTGAAGAT | 24022 |
| gb:MT039888 | Organism:Severe | AATTTTTCACAAATATTACCAGATCCATCAAACCAAGCAAGAGGTCATTTATTGAAGAT | 24022 |
| gb:LC522972 | Organism:Severe | AATTTTTCACAAATATTACCAGATCCATCAAACCAAGCAAGAGGTCATTTATTGAAGAT | 24019 |
| gb:MT027063 | Organism:Severe | AATTTTTCACAAATATTACCAGATCCATCAAACCAAGCAAGAGGTCATTTATTGAAGAT | 24022 |
| gb:MT027062 | Organism:Severe | AATTTTTCACAAATATTACCAGATCCATCAAACCAAGCAAGAGGTCATTTATTGAAGAT | 24022 |
| gb:MT019529 | Organism:Severe | AATTTTTCACAAATATTACCAGATCCATCAAACCAAGCAAGAGGTCATTTATTGAAGAT | 24022 |
| gb:MN996529 | Organism:Severe | AATTTTTCACAAATATTACCAGATCCATCAAACCAAGCAAGAGGTCATTTATTGAAGAT | 24010 |
| gb:MN996531 | Organism:Severe | AATTTTTCACAAATATTACCAGATCCATCAAACCAAGCAAGAGGTCATTTATTGAAGAT | 24009 |
| gb:MT066176 | Organism:Severe | AATTTTTCACAAATATTACCAGATCCATCAAACCAAGCAAGAGGTCATTTATTGAAGAT | 24022 |
| gb:MT027064 | Organism:Severe | AATTTTTCACAAATATTACCAGATCCATCAAACCAAGCAAGAGGTCATTTATTGAAGAT | 24022 |
| gb:MN994468 | Organism:Severe | AATTTTTCACAAATATTACCAGATCCATCAAACCAAGCAAGAGGTCATTTATTGAAGAT | 24022 |
| gb:MT072688 | Organism:Severe | AATTTTTCACAAATATTACCAGATCCATCAAACCAAGCAAGAGGTCATTTATTGAAGAT | 24007 |
| gb:MN996527 | Organism:Severe | AATTTTTCACAAATATTACCAGATCCATCAAACCAAGCAAGAGGTCATTTATTGAAGAT | 23989 |
| gb:MT093631 | Organism:Severe | AATTTTTCACAAATATTACCAGATCCATCAAACCAAGCAAGAGGTCATTTATTGAAGAT | 24060 |
| gb:MT106053 | Organism:Severe | AATTTTTCACAAATATTACCAGATCCATCAAACCAAGCAAGAGGTCATTTATTGAAGAT | 24022 |
| gb:MT019533 | Organism:Severe | AATTTTTCACAAATATTACCAGATCCATCAAACCAAGCAAGAGGTCATTTATTGAAGAT | 24022 |
| gb:MT019531 | Organism:Severe | AATTTTTCACAAATATTACCAGATCCATCAAACCAAGCAAGAGGTCATTTATTGAAGAT | 24022 |
| gb:MN996528 | Organism:Severe | AATTTTTCACAAATATTACCAGATCCATCAAACCAAGCAAGAGGTCATTTATTGAAGAT | 24022 |
| gb:MN996530 | Organism:Severe | AATTTTTCACAAATATTACCAGATCCATCAAACCAAGCAAGAGGTCATTTATTGAAGAT | 24008 |
| gb:MN908947 | Organism:Severe | AATTTTTCACAAATATTACCAGATCCATCAAACCAAGCAAGAGGTCATTTATTGAAGAT | 24022 |
| gb:MT019532 | Organism:Severe | AATTTTTCACAAATATTACCAGATCCATCAAACCAAGCAAGAGGTCATTTATTGAAGAT | 24022 |

\*\*\*\*\*

|             |                 |                                                              |       |
|-------------|-----------------|--------------------------------------------------------------|-------|
| gb:MT020781 | Organism:Severe | CTACTTTTCAACAAAGTGACACTTGCAGATGCTGGCTTCATCAAACAATATGGTGATTGC | 24070 |
| gb:MT007544 | Organism:Severe | CTACTTTTCAACAAAGTGACACTTGCAGATGCTGGCTTCATCAAACAATATGGTGATTGC | 24082 |
| gb:MN994467 | Organism:Severe | CTACTTTTCAATAAAGTGACACTTGCAGATGCTGGCTTCATCAAACAATATGGTGATTGC | 24082 |
| gb:MT044257 | Organism:Severe | CTACTTTTCAATAAAGTGACACTTGCAGATGCTGGCTTCATCAAACAATATGGTGATTGC | 24082 |
| gb:MT106054 | Organism:Severe | CTACTTTTCAACAAAGTGACACTTGCAGATGCTGGCTTCATCAAACAATATGGTGATTGC | 24082 |
| gb:MT049951 | Organism:Severe | CTACTTTTCAACAAAGTGACACTTGCAGATGCTGGCTTCATCAAACAATATGGTGATTGC | 24082 |
| gb:MN975262 | Organism:Severe | CTACTTTTCAACAAAGTGACACTTGCAGATGCTGGCTTCATCAAACAATATGGTGATTGC | 24082 |
| gb:MT106052 | Organism:Severe | CTACTTTTCAACAAAGTGACACTTGCAGATGCTGGCTTCATCAAACAATATGGTGATTGC | 24082 |
| gb:LC522975 | Organism:Severe | CTACTTTTCAACAAAGTGACACTTGCAGATGCTGGCTTCATCAAACAATATGGTGATTGC | 24079 |
| gb:LC522973 | Organism:Severe | CTACTTTTCAACAAAGTGACACTTGCAGATGCTGGCTTCATCAAACAATATGGTGATTGC | 24079 |



|             |                 |                                                              |       |
|-------------|-----------------|--------------------------------------------------------------|-------|
| gb:MN996529 | Organism:Severe | CTTGGTGATATTGCTGCTAGAGACCTCATTGTGCACAAAAGTTTAAACGGCCTTACTGTT | 24130 |
| gb:MN996531 | Organism:Severe | CTTGGTGATATTGCTGCTAGAGACCTCATTGTGCACAAAAGTTTAAACGGCCTTACTGTT | 24129 |
| gb:MT066176 | Organism:Severe | CTTGGTGATATTGCTGCTAGAGACCTCATTGTGCACAAAAGTTTAAACGGCCTTACTGTT | 24142 |
| gb:MT027064 | Organism:Severe | CTTGGTGATATTGCTGCTAGAGACCTCATTGTGCACAAAAGTTTAAACGGCCTTACTGTT | 24142 |
| gb:MN994468 | Organism:Severe | CTTGGTGATATTGCTGCTAGAGACCTCATTGTGCACAAAAGTTTAAACGGCCTTACTGTT | 24142 |
| gb:MT072688 | Organism:Severe | CTTGGTGATATTGCTGCTAGAGACCTCATTGTGCACAAAAGTTTAAACGGCCTTACTGTT | 24127 |
| gb:MN996527 | Organism:Severe | CTTGGTGATATTGCTGCTAGAGACCTCATTGTGCACAAAAGTTTAAACGGCCTTACTGTT | 24109 |
| gb:MT093631 | Organism:Severe | CTTGGTGATATTGCTGCTAGAGACCTCATTGTGCACAAAAGTTTAAACGGCCTTACTGTT | 24180 |
| gb:MT106053 | Organism:Severe | CTTGGTGATATTGCTGCTAGAGACCTCATTGTGCACAAAAGTTTAAACGGCCTTACTGTT | 24142 |
| gb:MT019533 | Organism:Severe | CTTGGTGATATTGCTGCTAGAGACCTCATTGTGCACAAAAGTTTAAACGGCCTTACTGTT | 24142 |
| gb:MT019531 | Organism:Severe | CTTGGTGATATTGCTGCTAGAGACCTCATTGTGCACAAAAGTTTAAACGGCCTTACTGTT | 24142 |
| gb:MN996528 | Organism:Severe | CTTGGTGATATTGCTGCTAGAGACCTCATTGTGCACAAAAGTTTAAACGGCCTTACTGTT | 24142 |
| gb:MN996530 | Organism:Severe | CTTGGTGATATTGCTGCTAGAGACCTCATTGTGCACAAAAGTTTAAACGGCCTTACTGTT | 24128 |
| gb:MN908947 | Organism:Severe | CTTGGTGATATTGCTGCTAGAGACCTCATTGTGCACAAAAGTTTAAACGGCCTTACTGTT | 24142 |
| gb:MT019532 | Organism:Severe | CTTGGTGATATTGCTGCTAGAGACCTCATTGTGCACAAAAGTTTAAACGGCCTTACTGTT | 24142 |

\*\*\*\*\*

|             |                 |                                                              |       |
|-------------|-----------------|--------------------------------------------------------------|-------|
| gb:MT020781 | Organism:Severe | TTGCCACCTTTGCTCACAGATGAAATGATTGCTCAATACACTTCTGCACTGTTAGCGGGT | 24190 |
| gb:MT007544 | Organism:Severe | TTGCCACCTTTGCTCACAGATGAAATGATTGCTCAATACACTTCTGCACTGTTAGCGGGT | 24202 |
| gb:MN994467 | Organism:Severe | TTGCCACCTTTGCTCACAGATGAAATGATTGCTCAATACACTTCTGCACTGTTAGCGGGT | 24202 |
| gb:MT044257 | Organism:Severe | TTGCCACCTTTGCTCACAGATGAAATGATTGCTCAATACACTTCTGCACTGTTAGCGGGT | 24202 |
| gb:MT106054 | Organism:Severe | TTGCCACCTTTGCTCACAGATGAAATGATTGCTCAATACACTTCTGCACTGTTAGCGGGT | 24202 |
| gb:MT049951 | Organism:Severe | TTGCCACCTTTGCTCACAGATGAAATGATTGCTCAATACACTTCTGCACTGTTAGCGGGT | 24202 |
| gb:MN975262 | Organism:Severe | TTGCCACCTTTGCTCACAGATGAAATGATTGCTCAATACACTTCTGCACTGTTAGCGGGT | 24202 |
| gb:MT106052 | Organism:Severe | TTGCCACCTTTGCTCACAGATGAAATGATTGCTCAATACACTTCTGCACTGTTAGCGGGT | 24202 |
| gb:LC522975 | Organism:Severe | TTGCCACCTTTGCTCACAGATGAAATGATTGCTCAATACACTTCTGCACTGTTAGCGGGT | 24199 |
| gb:LC522973 | Organism:Severe | TTGCCACCTTTGCTCACAGATGAAATGATTGCTCAATACACTTCTGCACTGTTAGCGGGT | 24199 |
| gb:LC522974 | Organism:Severe | TTGCCACCTTTGCTCACAGATGAAATGATTGCTCAATACACTTCTGCACTGTTAGCGGGT | 24199 |
| gb:MN985325 | Organism:Severe | TTGCCACCTTTGCTCACAGATGAAATGATTGCTCAATACACTTCTGCACTGTTAGCGGGT | 24202 |
| gb:MT020881 | Organism:Severe | TTGCCACCTTTGCTCACAGATGAAATGATTGCTCAATACACTTCTGCACTGTTAGCGGGT | 24202 |
| gb:MT020880 | Organism:Severe | TTGCCACCTTTGCTCACAGATGAAATGATTGCTCAATACACTTCTGCACTGTTAGCGGGT | 24202 |
| gb:MT066175 | Organism:Severe | TTGCCACCTTTGCTCACAGATGAAATGATTGCTCAATACACTTCTGCACTGTTAGCGGGT | 24202 |
| gb:MN997409 | Organism:Severe | TTGCCACCTTTGCTCACAGATGAAATGATTGCTCAATACACTTCTGCACTGTTAGCGGGT | 24202 |
| gb:MN938384 | Organism:Severe | TTGCCACCTTTGCTCACAGATGAAATGATTGCTCAATACACTTCTGCACTGTTAGCGGGT | 24170 |
| gb:MT044258 | Organism:Severe | TTGCCACCTTTGCTCACAGATGAAATGATTGCTCAATACACTTCTGCACTGTTAGCGGGT | 24178 |
| gb:MT039890 | Organism:Severe | TTGCCACCTTTGCTCACAGATGAAATGATTGCTCAATACACTTCTGCACTGTTAGCGGGT | 24202 |
| gb:MN988713 | Organism:Severe | TTGCCACCTTTGCTCACAGATGAAATGATTGCTCAATACACTTCTGCACTGTTAGCGGGT | 24202 |
| gb:LC521925 | Organism:Severe | TTGCCACCTTTGCTCACAGATGAAATGATTGCTCAATACACTTCTGCACTGTTAGCGGGT | 24175 |
| gb:MT093571 | Organism:Severe | TTGCCACCTTTGCTCACAGATGAAATGATTGCTCAATACACTTCTGCACTGTTAGCGGGT | 24202 |
| gb:MT039887 | Organism:Severe | TTGCCACCTTTGCTCACAGATGAAATGATTGCTCAATACACTTCTGCACTGTTAGCGGGT | 24199 |
| gb:MT019530 | Organism:Severe | TTGCCACCTTTGCTCACAGATGAAATGATTGCTCAATACACTTCTGCACTGTTAGCGGGT | 24202 |
| gb:MT039888 | Organism:Severe | TTGCCACCTTTGCTCACAGATGAAATGATTGCTCAATACACTTCTGCACTGTTAGCGGGT | 24202 |
| gb:LC522972 | Organism:Severe | TTGCCACCTTTGCTCACAGATGAAATGATTGCTCAATACACTTCTGCACTGTTAGCGGGT | 24199 |
| gb:MT027063 | Organism:Severe | TTGCCACCTTTGCTCACAGATGAAATGATTGCTCAATACACTTCTGCACTGTTAGCGGGT | 24202 |
| gb:MT027062 | Organism:Severe | TTGCCACCTTTGCTCACAGATGAAATGATTGCTCAATACACTTCTGCACTGTTAGCGGGT | 24202 |
| gb:MT019529 | Organism:Severe | TTGCCACCTTTGCTCACAGATGAAATGATTGCTCAATACACTTCTGCACTGTTAGCGGGT | 24202 |
| gb:MN996529 | Organism:Severe | TTGCCACCTTTGCTCACAGATGAAATGATTGCTCAATACACTTCTGCACTGTTAGCGGGT | 24190 |
| gb:MN996531 | Organism:Severe | TTGCCACCTTTGCTCACAGATGAAATGATTGCTCAATACACTTCTGCACTGTTAGCGGGT | 24189 |
| gb:MT066176 | Organism:Severe | TTGCCACCTTTGCTCACAGATGAAATGATTGCTCAATACACTTCTGCACTGTTAGCGGGT | 24202 |
| gb:MT027064 | Organism:Severe | TTGCCACCTTTGCTCACAGATGAAATGATTGCTCAATACACTTCTGCACTGTTAGCGGGT | 24202 |
| gb:MN994468 | Organism:Severe | TTGCCACCTTTGCTCACAGATGAAATGATTGCTCAATACACTTCTGCACTGTTAGCGGGT | 24202 |
| gb:MT072688 | Organism:Severe | TTGCCACCTTTGCTCACAGATGAAATGATTGCTCAATACACTTCTGCACTGTTAGCGGGT | 24187 |
| gb:MN996527 | Organism:Severe | TTGCCACCTTTGCTCACAGATGAAATGATTGCTCAATACACTTCTGCACTGTTAGCGGGT | 24169 |
| gb:MT093631 | Organism:Severe | TTGCCACCTTTGCTCACAGATGAAATGATTGCTCAATACACTTCTGCACTGTTAGCGGGT | 24240 |
| gb:MT106053 | Organism:Severe | TTGCCACCTTTGCTCACAGATGAAATGATTGCTCAATACACTTCTGCACTGTTAGCGGGT | 24202 |
| gb:MT019533 | Organism:Severe | TTGCCACCTTTGCTCACAGATGAAATGATTGCTCAATACACTTCTGCACTGTTAGCGGGT | 24202 |
| gb:MT019531 | Organism:Severe | TTGCCACCTTTGCTCACAGATGAAATGATTGCTCAATACACTTCTGCACTGTTAGCGGGT | 24202 |
| gb:MN996528 | Organism:Severe | TTGCCACCTTTGCTCACAGATGAAATGATTGCTCAATACACTTCTGCACTGTTAGCGGGT | 24202 |
| gb:MN996530 | Organism:Severe | TTGCCACCTTTGCTCACAGATGAAATGATTGCTCAATACACTTCTGCACTGTTAGCGGGT | 24188 |
| gb:MN908947 | Organism:Severe | TTGCCACCTTTGCTCACAGATGAAATGATTGCTCAATACACTTCTGCACTGTTAGCGGGT | 24202 |
| gb:MT019532 | Organism:Severe | TTGCCACCTTTGCTCACAGATGAAATGATTGCTCAATACACTTCTGCACTGTTAGCGGGT | 24202 |

\*\*\*\*\*

|             |                 |                                                             |       |
|-------------|-----------------|-------------------------------------------------------------|-------|
| gb:MT020781 | Organism:Severe | ACAATCACTTCTGGTTGGACCTTTGGTGCAGGTGCTGCATTACAAATACCATTGCTATG | 24250 |
| gb:MT007544 | Organism:Severe | ACAATCACTTCTGGTTGGACCTTTGGTGCAGGTGCTGCATTACAAATACCATTGCTATG | 24262 |





|             |                 |                                                             |       |
|-------------|-----------------|-------------------------------------------------------------|-------|
| gb:MT093571 | Organism:Severe | CAAATGGCTTATAGGTTAATGGTATTGGAGTTACACAGAATGTTCTCTATGAGAACCAA | 24322 |
| gb:MT039887 | Organism:Severe | CAAATGGCTTATAGGTTAATGGTATTGGAGTTACACAGAATGTTCTCTATGAGAACCAA | 24319 |
| gb:MT019530 | Organism:Severe | CAAATGGCTTATAGGTTAATGGTATTGGAGTTACACAGAATGTTCTCTATGAGAACCAA | 24322 |
| gb:MT039888 | Organism:Severe | CAAATGGCTTATAGGTTAATGGTATTGGAGTTACACAGAATGTTCTCTATGAGAACCAA | 24322 |
| gb:LC522972 | Organism:Severe | CAAATGGCTTATAGGTTAATGGTATTGGAGTTACACAGAATGTTCTCTATGAGAACCAA | 24319 |
| gb:MT027063 | Organism:Severe | CAAATGGCTTATAGGTTAATGGTATTGGAGTTACACAGAATGTTCTCTATGAGAACCAA | 24322 |
| gb:MT027062 | Organism:Severe | CAAATGGCTTATAGGTTAATGGTATTGGAGTTACACAGAATGTTCTCTATGAGAACCAA | 24322 |
| gb:MT019529 | Organism:Severe | CAAATGGCTTATAGGTTAATGGTATTGGAGTTACACAGAATGTTCTCTATGAGAACCAA | 24322 |
| gb:MN996529 | Organism:Severe | CAAATGGCTTATAGGTTAATGGTATTGGAGTTACACAGAATGTTCTCTATGAGAACCAA | 24310 |
| gb:MN996531 | Organism:Severe | CAAATGGCTTATAGGTTAATGGTATTGGAGTTACACAGAATGTTCTCTATGAGAACCAA | 24309 |
| gb:MT066176 | Organism:Severe | CAAATGGCTTATAGGTTAATGGTATTGGAGTTACACAGAATGTTCTCTATGAGAACCAA | 24322 |
| gb:MT027064 | Organism:Severe | CAAATGGCTTATAGGTTAATGGTATTGGAGTTACACAGAATGTTCTCTATGAGAACCAA | 24322 |
| gb:MN994468 | Organism:Severe | CAAATGGCTTATAGGTTAATGGTATTGGAGTTACACAGAATGTTCTCTATGAGAACCAA | 24322 |
| gb:MT072688 | Organism:Severe | CAAATGGCTTATAGGTTAATGGTATTGGAGTTACACAGAATGTTCTCTATGAGAACCAA | 24307 |
| gb:MN996527 | Organism:Severe | CAAATGGCTTATAGGTTAATGGTATTGGAGTTACACAGAATGTTCTCTATGAGAACCAA | 24289 |
| gb:MT093631 | Organism:Severe | CAAATGGCTTATAGGTTAATGGTATTGGAGTTACACAGAATGTTCTCTATGAGAACCAA | 24360 |
| gb:MT106053 | Organism:Severe | CAAATGGCTTATAGGTTAATGGTATTGGAGTTACACAGAATGTTCTCTATGAGAACCAA | 24322 |
| gb:MT019533 | Organism:Severe | CAAATGGCTTATAGGTTAATGGTATTGGAGTTACACAGAATGTTCTCTATGAGAACCAA | 24322 |
| gb:MT019531 | Organism:Severe | CAAATGGCTTATAGGTTAATGGTATTGGAGTTACACAGAATGTTCTCTATGAGAACCAA | 24322 |
| gb:MN996528 | Organism:Severe | CAAATGGCTTATAGGTTAATGGTATTGGAGTTACACAGAATGTTCTCTATGAGAACCAA | 24322 |
| gb:MN996530 | Organism:Severe | CAAATGGCTTATAGGTTAATGGTATTGGAGTTACACAGAATGTTCTCTATGAGAACCAA | 24308 |
| gb:MN908947 | Organism:Severe | CAAATGGCTTATAGGTTAATGGTATTGGAGTTACACAGAATGTTCTCTATGAGAACCAA | 24322 |
| gb:MT019532 | Organism:Severe | CAAATGGCTTATAGGTTAATGGTATTGGAGTTACACAGAATGTTCTCTATGAGAACCAA | 24322 |

\*\*\*\*\*

|             |                 |                                                            |       |
|-------------|-----------------|------------------------------------------------------------|-------|
| gb:MT020781 | Organism:Severe | AAATTGATTGCCAACCAATTTAATAGTGCTATTGGCAAAATTCAGACTCACTTCTTCC | 24370 |
| gb:MT007544 | Organism:Severe | AAATTGATTGCCAACCAATTTAATAGTGCTATTGGCAAAATTCAGACTCACTTCTTCC | 24382 |
| gb:MN994467 | Organism:Severe | AAATTGATTGCCAACCAATTTAATAGTGCTATTGGCAAAATTCAGACTCACTTCTTCC | 24382 |
| gb:MT044257 | Organism:Severe | AAATTGATTGCCAACCAATTTAATAGTGCTATTGGCAAAATTCAGACTCACTTCTTCC | 24382 |
| gb:MT106054 | Organism:Severe | AAATTGATTGCCAACCAATTTAATAGTGCTATTGGCAAAATTCAGACTCACTTCTTCC | 24382 |
| gb:MT049951 | Organism:Severe | AAATTGATTGCCAACCAATTTAATAGTGCTATTGGCAAAATTCAGACTCACTTCTTCC | 24382 |
| gb:MN975262 | Organism:Severe | AAATTGATTGCCAACCAATTTAATAGTGCTATTGGCAAAATTCAGACTCACTTCTTCC | 24382 |
| gb:MT106052 | Organism:Severe | AAATTGATTGCCAACCAATTTAATAGTGCTATTGGCAAAATTCAGACTCACTTCTTCC | 24382 |
| gb:LC522975 | Organism:Severe | AAATTGATTGCCAACCAATTTAATAGTGCTATTGGCAAAATTCAGACTCACTTCTTCC | 24379 |
| gb:LC522973 | Organism:Severe | AAATTGATTGCCAACCAATTTAATAGTGCTATTGGCAAAATTCAGACTCACTTCTTCC | 24379 |
| gb:LC522974 | Organism:Severe | AAATTGATTGCCAACCAATTTAATAGTGCTATTGGCAAAATTCAGACTCACTTCTTCC | 24379 |
| gb:MN985325 | Organism:Severe | AAATTGATTGCCAACCAATTTAATAGTGCTATTGGCAAAATTCAGACTCACTTCTTCC | 24382 |
| gb:MT020881 | Organism:Severe | AAATTGATTGCCAACCAATTTAATAGTGCTATTGGCAAAATTCAGACTCACTTCTTCC | 24382 |
| gb:MT020880 | Organism:Severe | AAATTGATTGCCAACCAATTTAATAGTGCTATTGGCAAAATTCAGACTCACTTCTTCC | 24382 |
| gb:MT066175 | Organism:Severe | AAATTGATTGCCAACCAATTTAATAGTGCTATTGGCAAAATTCAGACTCACTTCTTCC | 24382 |
| gb:MN997409 | Organism:Severe | AAATTGATTGCCAACCAATTTAATAGTGCTATTGGCAAAATTCAGACTCACTTCTTCC | 24382 |
| gb:MN938384 | Organism:Severe | AAATTGATTGCCAACCAATTTAATAGTGCTATTGGCAAAATTCAGACTCACTTCTTCC | 24350 |
| gb:MT044258 | Organism:Severe | AAATTGATTGCCAACCAATTTAATAGTGCTATTGGCAAAATTCAGACTCACTTCTTCC | 24358 |
| gb:MT039890 | Organism:Severe | AAATTGATTGCCAACCAATTTAATAGTGCTATTGGCAAAATTCAGACTCACTTCTTCC | 24382 |
| gb:MN988713 | Organism:Severe | AAATTGATTGCCAACCAATTTAATAGTGCTATTGGCAAAATTCAGACTCACTTCTTCC | 24382 |
| gb:LC521925 | Organism:Severe | AAATTGATTGCCAACCAATTTAATAGTGCTATTGGCAAAATTCAGACTCACTTCTTCC | 24355 |
| gb:MT093571 | Organism:Severe | AAATTGATTGCCAACCAATTTAATAGTGCTATTGGCAAAATTCAGACTCACTTCTTCC | 24382 |
| gb:MT039887 | Organism:Severe | AAATTGATTGCCAACCAATTTAATAGTGCTATTGGCAAAATTCAGACTCACTTCTTCC | 24379 |
| gb:MT019530 | Organism:Severe | AAATTGATTGCCAACCAATTTAATAGTGCTATTGGCAAAATTCAGACTCACTTCTTCC | 24382 |
| gb:MT039888 | Organism:Severe | AAATTGATTGCCAACCAATTTAATAGTGCTATTGGCAAAATTCAGACTCACTTCTTCC | 24382 |
| gb:LC522972 | Organism:Severe | AAATTGATTGCCAACCAATTTAATAGTGCTATTGGCAAAATTCAGACTCACTTCTTCC | 24379 |
| gb:MT027063 | Organism:Severe | AAATTGATTGCCAACCAATTTAATAGTGCTATTGGCAAAATTCAGACTCACTTCTTCC | 24382 |
| gb:MT027062 | Organism:Severe | AAATTGATTGCCAACCAATTTAATAGTGCTATTGGCAAAATTCAGACTCACTTCTTCC | 24382 |
| gb:MT019529 | Organism:Severe | AAATTGATTGCCAACCAATTTAATAGTGCTATTGGCAAAATTCAGACTCACTTCTTCC | 24382 |
| gb:MN996529 | Organism:Severe | AAATTGATTGCCAACCAATTTAATAGTGCTATTGGCAAAATTCAGACTCACTTCTTCC | 24370 |
| gb:MN996531 | Organism:Severe | AAATTGATTGCCAACCAATTTAATAGTGCTATTGGCAAAATTCAGACTCACTTCTTCC | 24369 |
| gb:MT066176 | Organism:Severe | AAATTGATTGCCAACCAATTTAATAGTGCTATTGGCAAAATTCAGACTCACTTCTTCC | 24382 |
| gb:MT027064 | Organism:Severe | AAATTGATTGCCAACCAATTTAATAGTGCTATTGGCAAAATTCAGACTCACTTCTTCC | 24382 |
| gb:MN994468 | Organism:Severe | AAATTGATTGCCAACCAATTTAATAGTGCTATTGGCAAAATTCAGACTCACTTCTTCC | 24382 |
| gb:MT072688 | Organism:Severe | AAATTGATTGCCAACCAATTTAATAGTGCTATTGGCAAAATTCAGACTCACTTCTTCC | 24367 |
| gb:MN996527 | Organism:Severe | AAGTTGATTGCCAACCAATTTAATAGTGCTATTGGCAAAATTCAGACTCACTTCTTCC | 24349 |
| gb:MT093631 | Organism:Severe | AAATTGATTGCCAACCAATTTAATAGTGCTATTGGCAAAATTCAGACTCACTTCTTCC | 24420 |
| gb:MT106053 | Organism:Severe | AAGTTGATTGCCAACCAATTTAATAGTGCTATTGGCAAAATTCAGACTCACTTCTTCC | 24382 |
| gb:MT019533 | Organism:Severe | AAATTGATTGCCAACCAATTTAATAGTGCTATTGGCAAAATTCAGACTCACTTCTTCC | 24382 |
| gb:MT019531 | Organism:Severe | AAATTGATTGCCAACCAATTTAATAGTGCTATTGGCAAAATTCAGACTCACTTCTTCC | 24382 |

|             |                  |                                                              |       |
|-------------|------------------|--------------------------------------------------------------|-------|
| gb:MN996528 | Organism: Severe | AAATTGATTGCCAACCAATTTAATAGTGCTATTGGCAAATTCAGACTCACTTTCTTCC   | 24382 |
| gb:MN996530 | Organism: Severe | AAATTGATTGCCAACCAATTTAATAGTGCTATTGGCAAATTCAGACTCACTTTCTTCC   | 24368 |
| gb:MN908947 | Organism: Severe | AAATTGATTGCCAACCAATTTAATAGTGCTATTGGCAAATTCAGACTCACTTTCTTCC   | 24382 |
| gb:MT019532 | Organism: Severe | AAATTGATTGCCAACCAATTTAATAGTGCTATTGGCAAATTCAGACTCACTTTCTTCC   | 24382 |
| ** *****    |                  |                                                              |       |
| gb:MT020781 | Organism: Severe | ACAGCAAGTGCACCTGGAAAACCTCAAGATGTGGTCAACCAAAATGCACAAGCTTTAAAC | 24430 |
| gb:MT007544 | Organism: Severe | ACAGCAAGTGCACCTGGAAAACCTCAAGATGTGGTCAACCAAAATGCACAAGCTTTAAAC | 24442 |
| gb:MN994467 | Organism: Severe | ACAGCAAGTGCACCTGGAAAACCTCAAGATGTGGTCAACCAAAATGCACAAGCTTTAAAC | 24442 |
| gb:MT044257 | Organism: Severe | ACAGCAAGTGCACCTGGAAAACCTCAAGATGTGGTCAACCAAAATGCACAAGCTTTAAAC | 24442 |
| gb:MT106054 | Organism: Severe | ACAGCAAGTGCACCTGGAAAACCTCAAGATGTGGTCAACCAAAATGCACAAGCTTTAAAC | 24442 |
| gb:MT049951 | Organism: Severe | ACAGCAAGTGCACCTGGAAAACCTCAAGATGTGGTCAACCAAAATGCACAAGCTTTAAAC | 24442 |
| gb:MN975262 | Organism: Severe | ACAGCAAGTGCACCTGGAAAACCTCAAGATGTGGTCAACCAAAATGCACAAGCTTTAAAC | 24442 |
| gb:MT106052 | Organism: Severe | ACAGCAAGTGCACCTGGAAAACCTCAAGATGTGGTCAACCAAAATGCACAAGCTTTAAAC | 24442 |
| gb:LC522975 | Organism: Severe | ACAGCAAGTGCACCTGGAAAACCTCAAGATGTGGTCAACCAAAATGCACAAGCTTTAAAC | 24439 |
| gb:LC522973 | Organism: Severe | ACAGCAAGTGCACCTGGAAAACCTCAAGATGTGGTCAACCAAAATGCACAAGCTTTAAAC | 24439 |
| gb:LC522974 | Organism: Severe | ACAGCAAGTGCACCTGGAAAACCTCAAGATGTGGTCAACCAAAATGCACAAGCTTTAAAC | 24439 |
| gb:MN985325 | Organism: Severe | ACAGCAAGTGCACCTGGAAAACCTCAAGATGTGGTCAACCAAAATGCACAAGCTTTAAAC | 24442 |
| gb:MT020881 | Organism: Severe | ACAGCAAGTGCACCTGGAAAACCTCAAGATGTGGTCAACCAAAATGCACAAGCTTTAAAC | 24442 |
| gb:MT020880 | Organism: Severe | ACAGCAAGTGCACCTGGAAAACCTCAAGATGTGGTCAACCAAAATGCACAAGCTTTAAAC | 24442 |
| gb:MT066175 | Organism: Severe | ACAGCAAGTGCACCTGGAAAACCTCAAGATGTGGTCAACCAAAATGCACAAGCTTTAAAC | 24442 |
| gb:MN997409 | Organism: Severe | ACAGCAAGTGCACCTGGAAAACCTCAAGATGTGGTCAACCAAAATGCACAAGCTTTAAAC | 24442 |
| gb:MN938384 | Organism: Severe | ACAGCAAGTGCACCTGGAAAACCTCAAGATGTGGTCAACCAAAATGCACAAGCTTTAAAC | 24410 |
| gb:MT044258 | Organism: Severe | ACAGCAAGTGCACCTGGAAAACCTCAAGATGTGGTCAACCAAAATGCACAAGCTTTAAAC | 24418 |
| gb:MT039890 | Organism: Severe | ACAGCAAGTGCACCTGGAAAACCTCAAGATGTGGTCAACCAAAATGCACAAGCTTTAAAC | 24442 |
| gb:MN988713 | Organism: Severe | ACAGCAAGTGCACCTGGAAAACCTCAAGATGTGGTCAACCAAAATGCACAAGCTTTAAAC | 24442 |
| gb:LC521925 | Organism: Severe | ACAGCAAGTGCACCTGGAAAACCTCAAGATGTGGTCAACCAAAATGCACAAGCTTTAAAC | 24415 |
| gb:MT093571 | Organism: Severe | ACAGCAAGTGCACCTGGAAAACCTCAAGATGTGGTCAACCAAAATGCACAAGCTTTAAAC | 24442 |
| gb:MT039887 | Organism: Severe | ACAGCAAGTGCACCTGGAAAACCTCAAGATGTGGTCAACCAAAATGCACAAGCTTTAAAC | 24439 |
| gb:MT019530 | Organism: Severe | ACAGCAAGTGCACCTGGAAAACCTCAAGATGTGGTCAACCAAAATGCACAAGCTTTAAAC | 24442 |
| gb:MT039888 | Organism: Severe | ACAGCAAGTGCACCTGGAAAACCTCAAGATGTGGTCAACCAAAATGCACAAGCTTTAAAC | 24442 |
| gb:LC522972 | Organism: Severe | ACAGCAAGTGCACCTGGAAAACCTCAAGATGTGGTCAACCAAAATGCACAAGCTTTAAAC | 24439 |
| gb:MT027063 | Organism: Severe | ACAGCAAGTGCACCTGGAAAACCTCAAGATGTGGTCAACCAAAATGCACAAGCTTTAAAC | 24442 |
| gb:MT027062 | Organism: Severe | ACAGCAAGTGCACCTGGAAAACCTCAAGATGTGGTCAACCAAAATGCACAAGCTTTAAAC | 24442 |
| gb:MT019529 | Organism: Severe | ACAGCAAGTGCACCTGGAAAACCTCAAGATGTGGTCAACCAAAATGCACAAGCTTTAAAC | 24442 |
| gb:MN996529 | Organism: Severe | ACAGCAAGTGCACCTGGAAAACCTCAAGATGTGGTCAACCAAAATGCACAAGCTTTAAAC | 24430 |
| gb:MN996531 | Organism: Severe | ACAGCAAGTGCACCTGGAAAACCTCAAGATGTGGTCAACCAAAATGCACAAGCTTTAAAC | 24429 |
| gb:MT066176 | Organism: Severe | ACAGCAAGTGCACCTGGAAAACCTCAAGATGTGGTCAACCAAAATGCACAAGCTTTAAAC | 24442 |
| gb:MT027064 | Organism: Severe | ACAGCAAGTGCACCTGGAAAACCTCAAGATGTGGTCAACCAAAATGCACAAGCTTTAAAC | 24442 |
| gb:MN994468 | Organism: Severe | ACAGCAAGTGCACCTGGAAAACCTCAAGATGTGGTCAACCAAAATGCACAAGCTTTAAAC | 24442 |
| gb:MT072688 | Organism: Severe | ACAGCAAGTGCACCTGGAAAACCTCAAGATGTGGTCAACCAAAATGCACAAGCTTTAAAC | 24427 |
| gb:MN996527 | Organism: Severe | ACAGCAAGTGCACCTGGAAAACCTCAAGATGTGGTCAACCAAAATGCACAAGCTTTAAAC | 24409 |
| gb:MT093631 | Organism: Severe | ACAGCAAGTGCACCTGGAAAACCTCAAGATGTGGTCAACCAAAATGCACAAGCTTTAAAC | 24480 |
| gb:MT106053 | Organism: Severe | ACAGCAAGTGCACCTGGAAAACCTCAAGATGTGGTCAACCAAAATGCACAAGCTTTAAAC | 24442 |
| gb:MT019533 | Organism: Severe | ACAGCAAGTGCACCTGGAAAACCTCAAGATGTGGTCAACCAAAATGCACAAGCTTTAAAC | 24442 |
| gb:MT019531 | Organism: Severe | ACAGCAAGTGCACCTGGAAAACCTCAAGATGTGGTCAACCAAAATGCACAAGCTTTAAAC | 24442 |
| gb:MN996528 | Organism: Severe | ACAGCAAGTGCACCTGGAAAACCTCAAGATGTGGTCAACCAAAATGCACAAGCTTTAAAC | 24442 |
| gb:MN996530 | Organism: Severe | ACAGCAAGTGCACCTGGAAAACCTCAAGATGTGGTCAACCAAAATGCACAAGCTTTAAAC | 24428 |
| gb:MN908947 | Organism: Severe | ACAGCAAGTGCACCTGGAAAACCTCAAGATGTGGTCAACCAAAATGCACAAGCTTTAAAC | 24442 |
| gb:MT019532 | Organism: Severe | ACAGCAAGTGCACCTGGAAAACCTCAAGATGTGGTCAACCAAAATGCACAAGCTTTAAAC | 24442 |
| *****       |                  |                                                              |       |
| gb:MT020781 | Organism: Severe | ACGCTTGTAAACAACCTTAGCTCCAATTTTGGTGCATTTCAAGTGTTTTAAATGATATC  | 24490 |
| gb:MT007544 | Organism: Severe | ACGCTTGTAAACAACCTTAGCTCCAATTTTGGTGCATTTCAAGTGTTTTAAATGATATC  | 24502 |
| gb:MN994467 | Organism: Severe | ACGCTTGTAAACAACCTTAGCTCCAATTTTGGTGCATTTCAAGTGTTTTAAATGATATC  | 24502 |
| gb:MT044257 | Organism: Severe | ACGCTTGTAAACAACCTTAGCTCCAATTTTGGTGCATTTCAAGTGTTTTAAATGATATC  | 24502 |
| gb:MT106054 | Organism: Severe | ACGCTTGTAAACAACCTTAGCTCCAATTTTGGTGCATTTCAAGTGTTTTAAATGATATC  | 24502 |
| gb:MT049951 | Organism: Severe | ACGCTTGTAAACAACCTTAGCTCCAATTTTGGTGCATTTCAAGTGTTTTAAATGATATC  | 24502 |
| gb:MN975262 | Organism: Severe | ACGCTTGTAAACAACCTTAGCTCCAATTTTGGTGCATTTCAAGTGTTTTAAATGATATC  | 24502 |
| gb:MT106052 | Organism: Severe | ACGCTTGTAAACAACCTTAGCTCCAATTTTGGTGCATTTCAAGTGTTTTAAATGATATC  | 24502 |
| gb:LC522975 | Organism: Severe | ACGCTTGTAAACAACCTTAGCTCCAATTTTGGTGCATTTCAAGTGTTTTAAATGATATC  | 24499 |
| gb:LC522973 | Organism: Severe | ACGCTTGTAAACAACCTTAGCTCCAATTTTGGTGCATTTCAAGTGTTTTAAATGATATC  | 24499 |
| gb:LC522974 | Organism: Severe | ACGCTTGTAAACAACCTTAGCTCCAATTTTGGTGCATTTCAAGTGTTTTAAATGATATC  | 24499 |
| gb:MN985325 | Organism: Severe | ACGCTTGTAAACAACCTTAGCTCCAATTTTGGTGCATTTCAAGTGTTTTAAATGATATC  | 24502 |
| gb:MT020881 | Organism: Severe | ACGCTTGTAAACAACCTTAGCTCCAATTTTGGTGCATTTCAAGTGTTTTAAATGATATC  | 24502 |

|             |                 |                                                             |       |
|-------------|-----------------|-------------------------------------------------------------|-------|
| gb:MT020880 | Organism:Severe | ACGCTTGTAAACAACCTTAGCTCCAATTTTGGTGCATTTCAAGTGTTTTAAATGATATC | 24502 |
| gb:MT066175 | Organism:Severe | ACGCTTGTAAACAACCTTAGCTCCAATTTTGGTGCATTTCAAGTGTTTTAAATGATATC | 24502 |
| gb:MN997409 | Organism:Severe | ACGCTTGTAAACAACCTTAGCTCCAATTTTGGTGCATTTCAAGTGTTTTAAATGATATC | 24502 |
| gb:MN938384 | Organism:Severe | ACGCTTGTAAACAACCTTAGCTCCAATTTTGGTGCATTTCAAGTGTTTTAAATGATATC | 24470 |
| gb:MT044258 | Organism:Severe | ACGCTTGTAAACAACCTTAGCTCCAATTTTGGTGCATTTCAAGTGTTTTAAATGATATC | 24478 |
| gb:MT039890 | Organism:Severe | ACGCTTGTAAACAACCTTAGCTCCAATTTTGGTGCATTTCAAGTGTTTTAAATGATATC | 24502 |
| gb:MN988713 | Organism:Severe | ACGCTTGTAAACAACCTTAGCTCCAATTTTGGTGCATTTCAAGTGTTTTAAATGATATC | 24502 |
| gb:LC521925 | Organism:Severe | ACGCTTGTAAACAACCTTAGCTCCAATTTTGGTGCATTTCAAGTGTTTTAAATGATATC | 24475 |
| gb:MT093571 | Organism:Severe | ACGCTTGTAAACAACCTTAGCTCCAATTTTGGTGCATTTCAAGTGTTTTAAATGATATC | 24502 |
| gb:MT039887 | Organism:Severe | ACGCTTGTAAACAACCTTAGCTCCAATTTTGGTGCATTTCAAGTGTTTTAAATGATATC | 24499 |
| gb:MT019530 | Organism:Severe | ACGCTTGTAAACAACCTTAGCTCCAATTTTGGTGCATTTCAAGTGTTTTAAATGATATC | 24502 |
| gb:MT039888 | Organism:Severe | ACGCTTGTAAACAACCTTAGCTCCAATTTTGGTGCATTTCAAGTGTTTTAAATGATATC | 24502 |
| gb:LC522972 | Organism:Severe | ACGCTTGTAAACAACCTTAGCTCCAATTTTGGTGCATTTCAAGTGTTTTAAATGATATC | 24499 |
| gb:MT027063 | Organism:Severe | ACGCTTGTAAACAACCTTAGCTCCAATTTTGGTGCATTTCAAGTGTTTTAAATGATATC | 24502 |
| gb:MT027062 | Organism:Severe | ACGCTTGTAAACAACCTTAGCTCCAATTTTGGTGCATTTCAAGTGTTTTAAATGATATC | 24502 |
| gb:MT019529 | Organism:Severe | ACGCTTGTAAACAACCTTAGCTCCAATTTTGGTGCATTTCAAGTGTTTTAAATGATATC | 24502 |
| gb:MN996529 | Organism:Severe | ACGCTTGTAAACAACCTTAGCTCCAATTTTGGTGCATTTCAAGTGTTTTAAATGATATC | 24490 |
| gb:MN996531 | Organism:Severe | ACGCTTGTAAACAACCTTAGCTCCAATTTTGGTGCATTTCAAGTGTTTTAAATGATATC | 24489 |
| gb:MT066176 | Organism:Severe | ACGCTTGTAAACAACCTTAGCTCCAATTTTGGTGCATTTCAAGTGTTTTAAATGATATC | 24502 |
| gb:MT027064 | Organism:Severe | ACGCTTGTAAACAACCTTAGCTCCAATTTTGGTGCATTTCAAGTGTTTTAAATGATATC | 24502 |
| gb:MN994468 | Organism:Severe | ACGCTTGTAAACAACCTTAGCTCCAATTTTGGTGCATTTCAAGTGTTTTAAATGATATC | 24502 |
| gb:MT072688 | Organism:Severe | ACGCTTGTAAACAACCTTAGCTCCAATTTTGGTGCATTTCAAGTGTTTTAAATGATATC | 24487 |
| gb:MN996527 | Organism:Severe | ACGCTTGTAAACAACCTTAGCTCCAATTTTGGTGCATTTCAAGTGTTTTAAATGATATC | 24469 |
| gb:MT093631 | Organism:Severe | ACGCTTGTAAACAACCTTAGCTCCAATTTTGGTGCATTTCAAGTGTTTTAAATGATATC | 24540 |
| gb:MT106053 | Organism:Severe | ACGCTTGTAAACAACCTTAGCTCCAATTTTGGTGCATTTCAAGTGTTTTAAATGATATC | 24502 |
| gb:MT019533 | Organism:Severe | ACGCTTGTAAACAACCTTAGCTCCAATTTTGGTGCATTTCAAGTGTTTTAAATGATATC | 24502 |
| gb:MT019531 | Organism:Severe | ACGCTTGTAAACAACCTTAGCTCCAATTTTGGTGCATTTCAAGTGTTTTAAATGATATC | 24502 |
| gb:MN996528 | Organism:Severe | ACGCTTGTAAACAACCTTAGCTCCAATTTTGGTGCATTTCAAGTGTTTTAAATGATATC | 24502 |
| gb:MN996530 | Organism:Severe | ACGCTTGTAAACAACCTTAGCTCCAATTTTGGTGCATTTCAAGTGTTTTAAATGATATC | 24488 |
| gb:MN908947 | Organism:Severe | ACGCTTGTAAACAACCTTAGCTCCAATTTTGGTGCATTTCAAGTGTTTTAAATGATATC | 24502 |
| gb:MT019532 | Organism:Severe | ACGCTTGTAAACAACCTTAGCTCCAATTTTGGTGCATTTCAAGTGTTTTAAATGATATC | 24502 |

\*\*\*\*\*

|             |                 |                                                               |       |
|-------------|-----------------|---------------------------------------------------------------|-------|
| gb:MT020781 | Organism:Severe | CTTTCACGCTTGTGACAAAGTTGAGGCTGAAGTGCAAATTTGATAGTTGATCACAGGCAGA | 24550 |
| gb:MT007544 | Organism:Severe | CTTTCACGCTTGTGACAAAGTTGAGGCTGAAGTGCAAATTTGATAGTTGATCACAGGCAGA | 24562 |
| gb:MN994467 | Organism:Severe | CTTTCACGCTTGTGACAAAGTTGAGGCTGAAGTGCAAATTTGATAGTTGATCACAGGCAGA | 24562 |
| gb:MT044257 | Organism:Severe | CTTTCACGCTTGTGACAAAGTTGAGGCTGAAGTGCAAATTTGATAGTTGATCACAGGCAGA | 24562 |
| gb:MT106054 | Organism:Severe | CTTTCACGCTTGTGACAAAGTTGAGGCTGAAGTGCAAATTTGATAGTTGATCACAGGCAGA | 24562 |
| gb:MT049951 | Organism:Severe | CTTTCACGCTTGTGACAAAGTTGAGGCTGAAGTGCAAATTTGATAGTTGATCACAGGCAGA | 24562 |
| gb:MN975262 | Organism:Severe | CTTTCACGCTTGTGACAAAGTTGAGGCTGAAGTGCAAATTTGATAGTTGATCACAGGCAGA | 24562 |
| gb:MT106052 | Organism:Severe | CTTTCACGCTTGTGACAAAGTTGAGGCTGAAGTGCAAATTTGATAGTTGATCACAGGCAGA | 24562 |
| gb:LC522975 | Organism:Severe | CTTTCACGCTTGTGACAAAGTTGAGGCTGAAGTGCAAATTTGATAGTTGATCACAGGCAGA | 24559 |
| gb:LC522973 | Organism:Severe | CTTTCACGCTTGTGACAAAGTTGAGGCTGAAGTGCAAATTTGATAGTTGATCACAGGCAGA | 24559 |
| gb:LC522974 | Organism:Severe | CTTTCACGCTTGTGACAAAGTTGAGGCTGAAGTGCAAATTTGATAGTTGATCACAGGCAGA | 24559 |
| gb:MN985325 | Organism:Severe | CTTTCACGCTTGTGACAAAGTTGAGGCTGAAGTGCAAATTTGATAGTTGATCACAGGCAGA | 24562 |
| gb:MT020881 | Organism:Severe | CTTTCACGCTTGTGACAAAGTTGAGGCTGAAGTGCAAATTTGATAGTTGATCACAGGCAGA | 24562 |
| gb:MT020880 | Organism:Severe | CTTTCACGCTTGTGACAAAGTTGAGGCTGAAGTGCAAATTTGATAGTTGATCACAGGCAGA | 24562 |
| gb:MT066175 | Organism:Severe | CTTTCACGCTTGTGACAAAGTTGAGGCTGAAGTGCAAATTTGATAGTTGATCACAGGCAGA | 24562 |
| gb:MN997409 | Organism:Severe | CTTTCACGCTTGTGACAAAGTTGAGGCTGAAGTGCAAATTTGATAGTTGATCACAGGCAGA | 24562 |
| gb:MN938384 | Organism:Severe | CTTTCACGCTTGTGACAAAGTTGAGGCTGAAGTGCAAATTTGATAGTTGATCACAGGCAGA | 24530 |
| gb:MT044258 | Organism:Severe | CTTTCACGCTTGTGACAAAGTTGAGGCTGAAGTGCAAATTTGATAGTTGATCACAGGCAGA | 24538 |
| gb:MT039890 | Organism:Severe | CTTTCACGCTTGTGACAAAGTTGAGGCTGAAGTGCAAATTTGATAGTTGATCACAGGCAGA | 24562 |
| gb:MN988713 | Organism:Severe | CTTTCACGCTTGTGACAAAGTTGAGGCTGAAGTGCAAATTTGATAGTTGATCACAGGCAGA | 24562 |
| gb:LC521925 | Organism:Severe | CTTTCACGCTTGTGACAAAGTTGAGGCTGAAGTGCAAATTTGATAGTTGATCACAGGCAGA | 24535 |
| gb:MT093571 | Organism:Severe | CTTTCACGCTTGTGACAAAGTTGAGGCTGAAGTGCAAATTTGATAGTTGATCACAGGCAGA | 24562 |
| gb:MT039887 | Organism:Severe | CTTTCACGCTTGTGACAAAGTTGAGGCTGAAGTGCAAATTTGATAGTTGATCACAGGCAGA | 24559 |
| gb:MT019530 | Organism:Severe | CTTTCACGCTTGTGACAAAGTTGAGGCTGAAGTGCAAATTTGATAGTTGATCACAGGCAGA | 24562 |
| gb:MT039888 | Organism:Severe | CTTTCACGCTTGTGACAAAGTTGAGGCTGAAGTGCAAATTTGATAGTTGATCACAGGCAGA | 24562 |
| gb:LC522972 | Organism:Severe | CTTTCACGCTTGTGACAAAGTTGAGGCTGAAGTGCAAATTTGATAGTTGATCACAGGCAGA | 24559 |
| gb:MT027063 | Organism:Severe | CTTTCACGCTTGTGACAAAGTTGAGGCTGAAGTGCAAATTTGATAGTTGATCACAGGCAGA | 24562 |
| gb:MT027062 | Organism:Severe | CTTTCACGCTTGTGACAAAGTTGAGGCTGAAGTGCAAATTTGATAGTTGATCACAGGCAGA | 24562 |
| gb:MT019529 | Organism:Severe | CTTTCACGCTTGTGACAAAGTTGAGGCTGAAGTGCAAATTTGATAGTTGATCACAGGCAGA | 24562 |
| gb:MN996529 | Organism:Severe | CTTTCACGCTTGTGACAAAGTTGAGGCTGAAGTGCAAATTTGATAGTTGATCACAGGCAGA | 24550 |
| gb:MN996531 | Organism:Severe | CTTTCACGCTTGTGACAAAGTTGAGGCTGAAGTGCAAATTTGATAGTTGATCACAGGCAGA | 24549 |
| gb:MT066176 | Organism:Severe | CTTTCACGCTTGTGACAAAGTTGAGGCTGAAGTGCAAATTTGATAGTTGATCACAGGCAGA | 24562 |

|             |                 |                                                               |       |
|-------------|-----------------|---------------------------------------------------------------|-------|
| gb:MT027064 | Organism:Severe | CTTTCACGCTTTGACAAAGTTGAGGCTGAAGTGCAAATTTGATAGGTTGATCACAGGCAGA | 24562 |
| gb:MN994468 | Organism:Severe | CTTTCACGCTTTGACAAAGTTGAGGCTGAAGTGCAAATTTGATAGGTTGATCACAGGCAGA | 24562 |
| gb:MT072688 | Organism:Severe | CTTTCACGCTTTGACAAAGTTGAGGCTGAAGTGCAAATTTGATAGGTTGATCACAGGCAGA | 24547 |
| gb:MN996527 | Organism:Severe | CTTTCACGCTTTGACAAAGTTGAGGCTGAAGTGCAAATTTGATAGGTTGATCACAGGCAGA | 24529 |
| gb:MT093631 | Organism:Severe | CTTTCACGCTTTGACAAAGTTGAGGCTGAAGTGCAAATTTGATAGGTTGATCACAGGCAGA | 24600 |
| gb:MT106053 | Organism:Severe | CTTTCACGCTTTGACAAAGTTGAGGCTGAAGTGCAAATTTGATAGGTTGATCACAGGCAGA | 24562 |
| gb:MT019533 | Organism:Severe | CTTTCACGCTTTGACAAAGTTGAGGCTGAAGTGCAAATTTGATAGGTTGATCACAGGCAGA | 24562 |
| gb:MT019531 | Organism:Severe | CTTTCACGCTTTGACAAAGTTGAGGCTGAAGTGCAAATTTGATAGGTTGATCACAGGCAGA | 24562 |
| gb:MN996528 | Organism:Severe | CTTTCACGCTTTGACAAAGTTGAGGCTGAAGTGCAAATTTGATAGGTTGATCACAGGCAGA | 24562 |
| gb:MN996530 | Organism:Severe | CTTTCACGCTTTGACAAAGTTGAGGCTGAAGTGCAAATTTGATAGGTTGATCACAGGCAGA | 24548 |
| gb:MN908947 | Organism:Severe | CTTTCACGCTTTGACAAAGTTGAGGCTGAAGTGCAAATTTGATAGGTTGATCACAGGCAGA | 24562 |
| gb:MT019532 | Organism:Severe | CTTTCACGCTTTGACAAAGTTGAGGCTGAAGTGCAAATTTGATAGGTTGATCACAGGCAGA | 24562 |

\*\*\*\*\*

|             |                 |                                                              |       |
|-------------|-----------------|--------------------------------------------------------------|-------|
| gb:MT020781 | Organism:Severe | CTTCAAAGTTTGCAGACATATGTGACTCAACAATTAATTAGAGCTGCAGAAATCAGAGCT | 24610 |
| gb:MT007544 | Organism:Severe | CTTCAAAGTTTGCAGACATATGTGACTCAACAATTAATTAGAGCTGCAGAAATCAGAGCT | 24622 |
| gb:MN994467 | Organism:Severe | CTTCAAAGTTTGCAGACATATGTGACTCAACAATTAATTAGAGCTGCAGAAATCAGAGCT | 24622 |
| gb:MT044257 | Organism:Severe | CTTCAAAGTTTGCAGACATATGTGACTCAACAATTAATTAGAGCTGCAGAAATCAGAGCT | 24622 |
| gb:MT106054 | Organism:Severe | CTTCAAAGTTTGCAGACATATGTGACTCAACAATTAATTAGAGCTGCAGAAATCAGAGCT | 24622 |
| gb:MT049951 | Organism:Severe | CTTCAAAGTTTGCAGACATATGTGACTCAACAATTAATTAGAGCTGCAGAAATCAGAGCT | 24622 |
| gb:MN975262 | Organism:Severe | CTTCAAAGTTTGCAGACATATGTGACTCAACAATTAATTAGAGCTGCAGAAATCAGAGCT | 24622 |
| gb:MT106052 | Organism:Severe | CTTCAAAGTTTGCAGACATATGTGACTCAACAATTAATTAGAGCTGCAGAAATCAGAGCT | 24622 |
| gb:LC522975 | Organism:Severe | CTTCAAAGTTTGCAGACATATGTGACTCAACAATTAATTAGAGCTGCAGAAATCAGAGCT | 24619 |
| gb:LC522973 | Organism:Severe | CTTCAAAGTTTGCAGACATATGTGACTCAACAATTAATTAGAGCTGCAGAAATCAGAGCT | 24619 |
| gb:LC522974 | Organism:Severe | CTTCAAAGTTTGCAGACATATGTGACTCAACAATTAATTAGAGCTGCAGAAATCAGAGCT | 24619 |
| gb:MN985325 | Organism:Severe | CTTCAAAGTTTGCAGACATATGTGACTCAACAATTAATTAGAGCTGCAGAAATCAGAGCT | 24622 |
| gb:MT020881 | Organism:Severe | CTTCAAAGTTTGCAGACATATGTGACTCAACAATTAATTAGAGCTGCAGAAATCAGAGCT | 24622 |
| gb:MT020880 | Organism:Severe | CTTCAAAGTTTGCAGACATATGTGACTCAACAATTAATTAGAGCTGCAGAAATCAGAGCT | 24622 |
| gb:MT066175 | Organism:Severe | CTTCAAAGTTTGCAGACATATGTGACTCAACAATTAATTAGAGCTGCAGAAATCAGAGCT | 24622 |
| gb:MN997409 | Organism:Severe | CTTCAAAGTTTGCAGACATATGTGACTCAACAATTAATTAGAGCTGCAGAAATCAGAGCT | 24622 |
| gb:MN938384 | Organism:Severe | CTTCAAAGTTTGCAGACATATGTGACTCAACAATTAATTAGAGCTGCAGAAATCAGAGCT | 24590 |
| gb:MT044258 | Organism:Severe | CTTCAAAGTTTGCAGACATATGTGACTCAACAATTAATTAGAGCTGCAGAAATCAGAGCT | 24598 |
| gb:MT039890 | Organism:Severe | CTTCAAAGTTTGCAGACATATGTGACTCAACAATTAATTAGAGCTGCAGAAATCAGAGCT | 24622 |
| gb:MN988713 | Organism:Severe | CTTCAAAGTTTGCAGACATATGTGACTCAACAATTAATTAGAGCTGCAGAAATCAGAGCT | 24622 |
| gb:LC521925 | Organism:Severe | CTTCAAAGTTTGCAGACATATGTGACTCAACAATTAATTAGAGCTGCAGAAATCAGAGCT | 24595 |
| gb:MT093571 | Organism:Severe | CTTCAAAGTTTGCAGACATATGTGACTCAACAATTAATTAGAGCTGCAGAAATCAGAGCT | 24622 |
| gb:MT039887 | Organism:Severe | CTTCAAAGTTTGCAGACATATGTGACTCAACAATTAATTAGAGCTGCAGAAATCAGAGCT | 24619 |
| gb:MT019530 | Organism:Severe | CTTCAAAGTTTGCAGACATATGTGACTCAACAATTAATTAGAGCTGCAGAAATCAGAGCT | 24622 |
| gb:MT039888 | Organism:Severe | CTTCAAAGTTTGCAGACATATGTGACTCAACAATTAATTAGAGCTGCAGAAATCAGAGCT | 24622 |
| gb:LC522972 | Organism:Severe | CTTCAAAGTTTGCAGACATATGTGACTCAACAATTAATTAGAGCTGCAGAAATCAGAGCT | 24619 |
| gb:MT027063 | Organism:Severe | CTTCAAAGTTTGCAGACATATGTGACTCAACAATTAATTAGAGCTGCAGAAATCAGAGCT | 24622 |
| gb:MT027062 | Organism:Severe | CTTCAAAGTTTGCAGACATATGTGACTCAACAATTAATTAGAGCTGCAGAAATCAGAGCT | 24622 |
| gb:MT019529 | Organism:Severe | CTTCAAAGTTTGCAGACATATGTGACTCAACAATTAATTAGAGCTGCAGAAATCAGAGCT | 24622 |
| gb:MN996529 | Organism:Severe | CTTCAAAGTTTGCAGACATATGTGACTCAACAATTAATTAGAGCTGCAGAAATCAGAGCT | 24610 |
| gb:MN996531 | Organism:Severe | CTTCAAAGTTTGCAGACATATGTGACTCAACAATTAATTAGAGCTGCAGAAATCAGAGCT | 24609 |
| gb:MT066176 | Organism:Severe | CTTCAAAGTTTGCAGACATATGTGACTCAACAATTAATTAGAGCTGCAGAAATCAGAGCT | 24622 |
| gb:MT027064 | Organism:Severe | CTTCAAAGTTTGCAGACATATGTGACTCAACAATTAATTAGAGCTGCAGAAATCAGAGCT | 24622 |
| gb:MN994468 | Organism:Severe | CTTCAAAGTTTGCAGACATATGTGACTCAACAATTAATTAGAGCTGCAGAAATCAGAGCT | 24622 |
| gb:MT072688 | Organism:Severe | CTTCAAAGTTTGCAGACATATGTGACTCAACAATTAATTAGAGCTGCAGAAATCAGAGCT | 24607 |
| gb:MN996527 | Organism:Severe | CTTCAAAGTTTGCAGACATATGTGACTCAACAATTAATTAGAGCTGCAGAAATCAGAGCT | 24589 |
| gb:MT093631 | Organism:Severe | CTTCAAAGTTTGCAGACATATGTGACTCAACAATTAATTAGAGCTGCAGAAATCAGAGCT | 24660 |
| gb:MT106053 | Organism:Severe | CTTCAAAGTTTGCAGACATATGTGACTCAACAATTAATTAGAGCTGCAGAAATCAGAGCT | 24622 |
| gb:MT019533 | Organism:Severe | CTTCAAAGTTTGCAGACATATGTGACTCAACAATTAATTAGAGCTGCAGAAATCAGAGCT | 24622 |
| gb:MT019531 | Organism:Severe | CTTCAAAGTTTGCAGACATATGTGACTCAACAATTAATTAGAGCTGCAGAAATCAGAGCT | 24622 |
| gb:MN996528 | Organism:Severe | CTTCAAAGTTTGCAGACATATGTGACTCAACAATTAATTAGAGCTGCAGAAATCAGAGCT | 24622 |
| gb:MN996530 | Organism:Severe | CTTCAAAGTTTGCAGACATATGTGACTCAACAATTAATTAGAGCTGCAGAAATCAGAGCT | 24608 |
| gb:MN908947 | Organism:Severe | CTTCAAAGTTTGCAGACATATGTGACTCAACAATTAATTAGAGCTGCAGAAATCAGAGCT | 24622 |
| gb:MT019532 | Organism:Severe | CTTCAAAGTTTGCAGACATATGTGACTCAACAATTAATTAGAGCTGCAGAAATCAGAGCT | 24622 |

\*\*\*\*\*

|             |                 |                                                             |       |
|-------------|-----------------|-------------------------------------------------------------|-------|
| gb:MT020781 | Organism:Severe | TCTGCTAATCTTGCTGCTACTAAAATGTCAGAGTGTGACTTGGACAATCAAAAAGAGTT | 24670 |
| gb:MT007544 | Organism:Severe | TCTGCTAATCTTGCTGCTACTAAAATGTCAGAGTGTGACTTGGACAATCAAAAAGAGTT | 24682 |
| gb:MN994467 | Organism:Severe | TCTGCTAATCTTGCTGCTACTAAAATGTCAGAGTGTGACTTGGACAATCAAAAAGAGTT | 24682 |
| gb:MT044257 | Organism:Severe | TCTGCTAATCTTGCTGCTACTAAAATGTCAGAGTGTGACTTGGACAATCAAAAAGAGTT | 24682 |
| gb:MT106054 | Organism:Severe | TCTGCTAATCTTGCTGCTACTAAAATGTCAGAGTGTGACTTGGACAATCAAAAAGAGTT | 24682 |

|             |                 |                                         |       |
|-------------|-----------------|-----------------------------------------|-------|
| gb:MT049951 | Organism:Severe | TCTGCTAATCTTGCTGCTACTAAAATGTCAGAGTGTGTA | 24682 |
| gb:MN975262 | Organism:Severe | TCTGCTAATCTTGCTGCTACTAAAATGTCAGAGTGTGTA | 24682 |
| gb:MT106052 | Organism:Severe | TCTGCTAATCTTGCTGCTACTAAAATGTCAGAGTGTGTA | 24682 |
| gb:LC522975 | Organism:Severe | TCTGCTAATCTTGCTGCTACTAAAATGTCAGAGTGTGTA | 24679 |
| gb:LC522973 | Organism:Severe | TCTGCTAATCTTGCTGCTACTAAAATGTCAGAGTGTGTA | 24679 |
| gb:LC522974 | Organism:Severe | TCTGCTAATCTTGCTGCTACTAAAATGTCAGAGTGTGTA | 24679 |
| gb:MN985325 | Organism:Severe | TCTGCTAATCTTGCTGCTACTAAAATGTCAGAGTGTGTA | 24682 |
| gb:MT020881 | Organism:Severe | TCTGCTAATCTTGCTGCTACTAAAATGTCAGAGTGTGTA | 24682 |
| gb:MT020880 | Organism:Severe | TCTGCTAATCTTGCTGCTACTAAAATGTCAGAGTGTGTA | 24682 |
| gb:MT066175 | Organism:Severe | TCTGCTAATCTTGCTGCTACTAAAATGTCAGAGTGTGTA | 24682 |
| gb:MN997409 | Organism:Severe | TCTGCTAATCTTGCTGCTACTAAAATGTCAGAGTGTGTA | 24682 |
| gb:MN938384 | Organism:Severe | TCTGCTAATCTTGCTGCTACTAAAATGTCAGAGTGTGTA | 24650 |
| gb:MT044258 | Organism:Severe | TCTGCTAATCTTGCTGCTACTAAAATGTCAGAGTGTGTA | 24658 |
| gb:MT039890 | Organism:Severe | TCTGCTAATCTTGCTGCTACTAAAATGTCAGAGTGTGTA | 24682 |
| gb:MN988713 | Organism:Severe | TCTGCTAATCTTGCTGCTACTAAAATGTCAGAGTGTGTA | 24682 |
| gb:LC521925 | Organism:Severe | TCTGCTAATCTTGCTGCTACTAAAATGTCAGAGTGTGTA | 24655 |
| gb:MT093571 | Organism:Severe | TCTGCTAATCTTGCTGCTACTAAAATGTCAGAGTGTGTA | 24682 |
| gb:MT039887 | Organism:Severe | TCTGCTAATCTTGCTGCTACTAAAATGTCAGAGTGTGTA | 24679 |
| gb:MT019530 | Organism:Severe | TCTGCTAATCTTGCTGCTACTAAAATGTCAGAGTGTGTA | 24682 |
| gb:MT039888 | Organism:Severe | TCTGCTAATCTTGCTGCTACTAAAATGTCAGAGTGTGTA | 24682 |
| gb:LC522972 | Organism:Severe | TCTGCTAATCTTGCTGCTACTAAAATGTCAGAGTGTGTA | 24679 |
| gb:MT027063 | Organism:Severe | TCTGCTAATCTTGCTGCTACTAAAATGTCAGAGTGTGTA | 24682 |
| gb:MT027062 | Organism:Severe | TCTGCTAATCTTGCTGCTACTAAAATGTCAGAGTGTGTA | 24682 |
| gb:MT019529 | Organism:Severe | TCTGCTAATCTTGCTGCTACTAAAATGTCAGAGTGTGTA | 24682 |
| gb:MN996529 | Organism:Severe | TCTGCTAATCTTGCTGCTACTAAAATGTCAGAGTGTGTA | 24670 |
| gb:MN996531 | Organism:Severe | TCTGCTAATCTTGCTGCTACTAAAATGTCAGAGTGTGTA | 24669 |
| gb:MT066176 | Organism:Severe | TCTGCTAATCTTGCTGCTACTAAAATGTCAGAGTGTGTA | 24682 |
| gb:MT027064 | Organism:Severe | TCTGCTAATCTTGCTGCTACTAAAATGTCAGAGTGTGTA | 24682 |
| gb:MN994468 | Organism:Severe | TCTGCTAATCTTGCTGCTACTAAAATGTCAGAGTGTGTA | 24682 |
| gb:MT072688 | Organism:Severe | TCTGCTAATCTTGCTGCTACTAAAATGTCAGAGTGTGTA | 24667 |
| gb:MN996527 | Organism:Severe | TCTGCTAATCTTGCTGCTACTAAAATGTCAGAGTGTGTA | 24649 |
| gb:MT093631 | Organism:Severe | TCTGCTAATCTTGCTGCTACTAAAATGTCAGAGTGTGTA | 24720 |
| gb:MT106053 | Organism:Severe | TCTGCTAATCTTGCTGCTACTAAAATGTCAGAGTGTGTA | 24682 |
| gb:MT019533 | Organism:Severe | TCTGCTAATCTTGCTGCTACTAAAATGTCAGAGTGTGTA | 24682 |
| gb:MT019531 | Organism:Severe | TCTGCTAATCTTGCTGCTACTAAAATGTCAGAGTGTGTA | 24682 |
| gb:MN996528 | Organism:Severe | TCTGCTAATCTTGCTGCTACTAAAATGTCAGAGTGTGTA | 24682 |
| gb:MN996530 | Organism:Severe | TCTGCTAATCTTGCTGCTACTAAAATGTCAGAGTGTGTA | 24668 |
| gb:MN908947 | Organism:Severe | TCTGCTAATCTTGCTGCTACTAAAATGTCAGAGTGTGTA | 24682 |
| gb:MT019532 | Organism:Severe | TCTGCTAATCTTGCTGCTACTAAAATGTCAGAGTGTGTA | 24682 |

\*\*\*\*\*

|             |                 |                                                            |       |
|-------------|-----------------|------------------------------------------------------------|-------|
| gb:MT020781 | Organism:Severe | GATTTTGTGGAAAGGGCTATCATCTTATGTCCTCCCTCAGTCAGCACCTCATGGTGTA | 24730 |
| gb:MT007544 | Organism:Severe | GATTTTGTGGAAAGGGCTATCATCTTATGTCCTCCCTCAGTCAGCACCTCATGGTGTA | 24742 |
| gb:MN994467 | Organism:Severe | GATTTTGTGGAAAGGGCTATCATCTTATGTCCTCCCTCAGTCAGCACCTCATGGTGTA | 24742 |
| gb:MT044257 | Organism:Severe | GATTTTGTGGAAAGGGCTATCATCTTATGTCCTCCCTCAGTCAGCACCTCATGGTGTA | 24742 |
| gb:MT106054 | Organism:Severe | GATTTTGTGGAAAGGGCTATCATCTTATGTCCTCCCTCAGTCAGCACCTCATGGTGTA | 24742 |
| gb:MT049951 | Organism:Severe | GATTTTGTGGAAAGGGCTATCATCTTATGTCCTCCCTCAGTCAGCACCTCATGGTGTA | 24742 |
| gb:MN975262 | Organism:Severe | GATTTTGTGGAAAGGGCTATCATCTTATGTCCTCCCTCAGTCAGCACCTCATGGTGTA | 24742 |
| gb:MT106052 | Organism:Severe | GATTTTGTGGAAAGGGCTATCATCTTATGTCCTCCCTCAGTCAGCACCTCATGGTGTA | 24742 |
| gb:LC522975 | Organism:Severe | GATTTTGTGGAAAGGGCTATCATCTTATGTCCTCCCTCAGTCAGCACCTCATGGTGTA | 24739 |
| gb:LC522973 | Organism:Severe | GATTTTGTGGAAAGGGCTATCATCTTATGTCCTCCCTCAGTCAGCACCTCATGGTGTA | 24739 |
| gb:LC522974 | Organism:Severe | GATTTTGTGGAAAGGGCTATCATCTTATGTCCTCCCTCAGTCAGCACCTCATGGTGTA | 24739 |
| gb:MN985325 | Organism:Severe | GATTTTGTGGAAAGGGCTATCATCTTATGTCCTCCCTCAGTCAGCACCTCATGGTGTA | 24742 |
| gb:MT020881 | Organism:Severe | GATTTTGTGGAAAGGGCTATCATCTTATGTCCTCCCTCAGTCAGCACCTCATGGTGTA | 24742 |
| gb:MT020880 | Organism:Severe | GATTTTGTGGAAAGGGCTATCATCTTATGTCCTCCCTCAGTCAGCACCTCATGGTGTA | 24742 |
| gb:MT066175 | Organism:Severe | GATTTTGTGGAAAGGGCTATCATCTTATGTCCTCCCTCAGTCAGCACCTCATGGTGTA | 24742 |
| gb:MN997409 | Organism:Severe | GATTTTGTGGAAAGGGCTATCATCTTATGTCCTCCCTCAGTCAGCACCTCATGGTGTA | 24742 |
| gb:MN938384 | Organism:Severe | GATTTTGTGGAAAGGGCTATCATCTTATGTCCTCCCTCAGTCAGCACCTCATGGTGTA | 24710 |
| gb:MT044258 | Organism:Severe | GATTTTGTGGAAAGGGCTATCATCTTATGTCCTCCCTCAGTCAGCACCTCATGGTGTA | 24718 |
| gb:MT039890 | Organism:Severe | GATTTTGTGGAAAGGGCTATCATCTTATGTCCTCCCTCAGTCAGCACCTCATGGTGTA | 24742 |
| gb:MN988713 | Organism:Severe | GATTTTGTGGAAAGGGCTATCATCTTATGTCCTCCCTCAGTCAGCACCTCATGGTGTA | 24742 |
| gb:LC521925 | Organism:Severe | GATTTTGTGGAAAGGGCTATCATCTTATGTCCTCCCTCAGTCAGCACCTCATGGTGTA | 24715 |
| gb:MT093571 | Organism:Severe | GATTTTGTGGAAAGGGCTATCATCTTATGTCCTCCCTCAGTCAGCACCTCATGGTGTA | 24742 |
| gb:MT039887 | Organism:Severe | GATTTTGTGGAAAGGGCTATCATCTTATGTCCTCCCTCAGTCAGCACCTCATGGTGTA | 24739 |
| gb:MT019530 | Organism:Severe | GATTTTGTGGAAAGGGCTATCATCTTATGTCCTCCCTCAGTCAGCACCTCATGGTGTA | 24742 |

|             |                 |                                                             |       |
|-------------|-----------------|-------------------------------------------------------------|-------|
| gb:MT039888 | Organism:Severe | GATTTTTGTGAAAGGGCTATCATCTTATGTCCTTCCCTCAGTCAGCACCTCATGGTGTA | 24742 |
| gb:LC522972 | Organism:Severe | GATTTTTGTGAAAGGGCTATCATCTTATGTCCTTCCCTCAGTCAGCACCTCATGGTGTA | 24739 |
| gb:MT027063 | Organism:Severe | GATTTTTGTGAAAGGGCTATCATCTTATGTCCTTCCCTCAGTCAGCACCTCATGGTGTA | 24742 |
| gb:MT027062 | Organism:Severe | GATTTTTGTGAAAGGGCTATCATCTTATGTCCTTCCCTCAGTCAGCACCTCATGGTGTA | 24742 |
| gb:MT019529 | Organism:Severe | GATTTTTGTGAAAGGGCTATCATCTTATGTCCTTCCCTCAGTCAGCACCTCATGGTGTA | 24742 |
| gb:MN996529 | Organism:Severe | GATTTTTGTGAAAGGGCTATCATCTTATGTCCTTCCCTCAGTCAGCACCTCATGGTGTA | 24730 |
| gb:MN996531 | Organism:Severe | GATTTTTGTGAAAGGGCTATCATCTTATGTCCTTCCCTCAGTCAGCACCTCATGGTGTA | 24729 |
| gb:MT066176 | Organism:Severe | GATTTTTGTGAAAGGGCTATCATCTTATGTCCTTCCCTCAGTCAGCACCTCATGGTGTA | 24742 |
| gb:MT027064 | Organism:Severe | GATTTTTGTGAAAGGGCTATCATCTTATGTCCTTCCCTCAGTCAGCACCTCATGGTGTA | 24742 |
| gb:MN994468 | Organism:Severe | GATTTTTGTGAAAGGGCTATCATCTTATGTCCTTCCCTCAGTCAGCACCTCATGGTGTA | 24742 |
| gb:MT072688 | Organism:Severe | GATTTTTGTGAAAGGGCTATCATCTTATGTCCTTCCCTCAGTCAGCACCTCATGGTGTA | 24727 |
| gb:MN996527 | Organism:Severe | GATTTTTGTGAAAGGGCTATCATCTTATGTCCTTCCCTCAGTCAGCACCTCATGGTGTA | 24709 |
| gb:MT093631 | Organism:Severe | GATTTTTGTGAAAGGGCTATCATCTTATGTCCTTCCCTCAGTCAGCACCTCATGGTGTA | 24780 |
| gb:MT106053 | Organism:Severe | GATTTTTGTGAAAGGGCTATCATCTTATGTCCTTCCCTCAGTCAGCACCTCATGGTGTA | 24742 |
| gb:MT019533 | Organism:Severe | GATTTTTGTGAAAGGGCTATCATCTTATGTCCTTCCCTCAGTCAGCACCTCATGGTGTA | 24742 |
| gb:MT019531 | Organism:Severe | GATTTTTGTGAAAGGGCTATCATCTTATGTCCTTCCCTCAGTCAGCACCTCATGGTGTA | 24742 |
| gb:MN996528 | Organism:Severe | GATTTTTGTGAAAGGGCTATCATCTTATGTCCTTCCCTCAGTCAGCACCTCATGGTGTA | 24742 |
| gb:MN996530 | Organism:Severe | GATTTTTGTGAAAGGGCTATCATCTTATGTCCTTCCCTCAGTCAGCACCTCATGGTGTA | 24728 |
| gb:MN908947 | Organism:Severe | GATTTTTGTGAAAGGGCTATCATCTTATGTCCTTCCCTCAGTCAGCACCTCATGGTGTA | 24742 |
| gb:MT019532 | Organism:Severe | GATTTTTGTGAAAGGGCTATCATCTTATGTCCTTCCCTCAGTCAGCACCTCATGGTGTA | 24742 |

\*\*\*\*\*

|             |                 |                                                             |       |
|-------------|-----------------|-------------------------------------------------------------|-------|
| gb:MT020781 | Organism:Severe | GTCTTCTTGCATGTGACTTATGTCCTGCACAAGAAAAGAAGTTCACAACTGCTCCTGCC | 24790 |
| gb:MT007544 | Organism:Severe | GTCTTCTTGCATGTGACTTATGTCCTGCACAAGAAAAGAAGTTCACAACTGCTCCTGCC | 24802 |
| gb:MN994467 | Organism:Severe | GTCTTCTTGCATGTGACTTATGTCCTGCACAAGAAAAGAAGTTCACAACTGCTCCTGCC | 24802 |
| gb:MT044257 | Organism:Severe | GTCTTCTTGCATGTGACTTATGTCCTGCACAAGAAAAGAAGTTCACAACTGCTCCTGCC | 24802 |
| gb:MT106054 | Organism:Severe | GTCTTCTTGCATGTGACTTATGTCCTGCACAAGAAAAGAAGTTCACAACTGCTCCTGCC | 24802 |
| gb:MT049951 | Organism:Severe | GTCTTCTTGCATGTGACTTATGTCCTGCACAAGAAAAGAAGTTCACAACTGCTCCTGCC | 24802 |
| gb:MN975262 | Organism:Severe | GTCTTCTTGCATGTGACTTATGTCCTGCACAAGAAAAGAAGTTCACAACTGCTCCTGCC | 24802 |
| gb:MT106052 | Organism:Severe | GTCTTCTTGCATGTGACTTATGTCCTGCACAAGAAAAGAAGTTCACAACTGCTCCTGCC | 24802 |
| gb:LC522975 | Organism:Severe | GTCTTCTTGCATGTGACTTATGTCCTGCACAAGAAAAGAAGTTCACAACTGCTCCTGCC | 24799 |
| gb:LC522973 | Organism:Severe | GTCTTCTTGCATGTGACTTATGTCCTGCACAAGAAAAGAAGTTCACAACTGCTCCTGCC | 24799 |
| gb:LC522974 | Organism:Severe | GTCTTCTTGCATGTGACTTATGTCCTGCACAAGAAAAGAAGTTCACAACTGCTCCTGCC | 24799 |
| gb:MN985325 | Organism:Severe | GTCTTCTTGCATGTGACTTATGTCCTGCACAAGAAAAGAAGTTCACAACTGCTCCTGCC | 24802 |
| gb:MT020881 | Organism:Severe | GTCTTCTTGCATGTGACTTATGTCCTGCACAAGAAAAGAAGTTCACAACTGCTCCTGCC | 24802 |
| gb:MT020880 | Organism:Severe | GTCTTCTTGCATGTGACTTATGTCCTGCACAAGAAAAGAAGTTCACAACTGCTCCTGCC | 24802 |
| gb:MT066175 | Organism:Severe | GTCTTCTTGCATGTGACTTATGTCCTGCACAAGAAAAGAAGTTCACAACTGCTCCTGCC | 24802 |
| gb:MN997409 | Organism:Severe | GTCTTCTTGCATGTGACTTATGTCCTGCACAAGAAAAGAAGTTCACAACTGCTCCTGCC | 24802 |
| gb:MN938384 | Organism:Severe | GTCTTCTTGCATGTGACTTATGTCCTGCACAAGAAAAGAAGTTCACAACTGCTCCTGCC | 24770 |
| gb:MT044258 | Organism:Severe | GTCTTCTTGCATGTGACTTATGTCCTGCACAAGAAAAGAAGTTCACAACTGCTCCTGCC | 24778 |
| gb:MT039890 | Organism:Severe | GTCTTCTTGCATGTGACTTATGTCCTGCACAAGAAAAGAAGTTCACAACTGCTCCTGCC | 24802 |
| gb:MN988713 | Organism:Severe | GTCTTCTTGCATGTGACTTATGTCCTGCACAAGAAAAGAAGTTCACAACTGCTCCTGCC | 24802 |
| gb:LC521925 | Organism:Severe | GTCTTCTTGCATGTGACTTATGTCCTGCACAAGAAAAGAAGTTCACAACTGCTCCTGCC | 24775 |
| gb:MT093571 | Organism:Severe | GTCTTCTTGCATGTGACTTATGTCCTGCACAAGAAAAGAAGTTCACAACTGCTCCTGCC | 24802 |
| gb:MT039887 | Organism:Severe | GTCTTCTTGCATGTGACTTATGTCCTGCACAAGAAAAGAAGTTCACAACTGCTCCTGCC | 24799 |
| gb:MT019530 | Organism:Severe | GTCTTCTTGCATGTGACTTATGTCCTGCACAAGAAAAGAAGTTCACAACTGCTCCTGCC | 24802 |
| gb:MT039888 | Organism:Severe | GTCTTCTTGCATGTGACTTATGTCCTGCACAAGAAAAGAAGTTCACAACTGCTCCTGCC | 24802 |
| gb:LC522972 | Organism:Severe | GTCTTCTTGCATGTGACTTATGTCCTGCACAAGAAAAGAAGTTCACAACTGCTCCTGCC | 24799 |
| gb:MT027063 | Organism:Severe | GTCTTCTTGCATGTGACTTATGTCCTGCACAAGAAAAGAAGTTCACAACTGCTCCTGCC | 24802 |
| gb:MT027062 | Organism:Severe | GTCTTCTTGCATGTGACTTATGTCCTGCACAAGAAAAGAAGTTCACAACTGCTCCTGCC | 24802 |
| gb:MT019529 | Organism:Severe | GTCTTCTTGCATGTGACTTATGTCCTGCACAAGAAAAGAAGTTCACAACTGCTCCTGCC | 24802 |
| gb:MN996529 | Organism:Severe | GTCTTCTTGCATGTGACTTATGTCCTGCACAAGAAAAGAAGTTCACAACTGCTCCTGCC | 24790 |
| gb:MN996531 | Organism:Severe | GTCTTCTTGCATGTGACTTATGTCCTGCACAAGAAAAGAAGTTCACAACTGCTCCTGCC | 24789 |
| gb:MT066176 | Organism:Severe | GTCTTCTTGCATGTGACTTATGTCCTGCACAAGAAAAGAAGTTCACAACTGCTCCTGCC | 24802 |
| gb:MT027064 | Organism:Severe | GTCTTCTTGCATGTGACTTATGTCCTGCACAAGAAAAGAAGTTCACAACTGCTCCTGCC | 24802 |
| gb:MN994468 | Organism:Severe | GTCTTCTTGCATGTGACTTATGTCCTGCACAAGAAAAGAAGTTCACAACTGCTCCTGCC | 24802 |
| gb:MT072688 | Organism:Severe | GTCTTCTTGCATGTGACTTATGTCCTGCACAAGAAAAGAAGTTCACAACTGCTCCTGCC | 24787 |
| gb:MN996527 | Organism:Severe | GTCTTCTTGCATGTGACTTATGTCCTGCACAAGAAAAGAAGTTCACAACTGCTCCTGCC | 24769 |
| gb:MT093631 | Organism:Severe | GTCTTCTTGCATGTGACTTATGTCCTGCACAAGAAAAGAAGTTCACAACTGCTCCTGCC | 24840 |
| gb:MT106053 | Organism:Severe | GTCTTCTTGCATGTGACTTATGTCCTGCACAAGAAAAGAAGTTCACAACTGCTCCTGCC | 24802 |
| gb:MT019533 | Organism:Severe | GTCTTCTTGCATGTGACTTATGTCCTGCACAAGAAAAGAAGTTCACAACTGCTCCTGCC | 24802 |
| gb:MT019531 | Organism:Severe | GTCTTCTTGCATGTGACTTATGTCCTGCACAAGAAAAGAAGTTCACAACTGCTCCTGCC | 24802 |
| gb:MN996528 | Organism:Severe | GTCTTCTTGCATGTGACTTATGTCCTGCACAAGAAAAGAAGTTCACAACTGCTCCTGCC | 24802 |
| gb:MN996530 | Organism:Severe | GTCTTCTTGCATGTGACTTATGTCCTGCACAAGAAAAGAAGTTCACAACTGCTCCTGCC | 24788 |
| gb:MN908947 | Organism:Severe | GTCTTCTTGCATGTGACTTATGTCCTGCACAAGAAAAGAAGTTCACAACTGCTCCTGCC | 24802 |

|             |                  |                                                                        |       |
|-------------|------------------|------------------------------------------------------------------------|-------|
| gb:MT019532 | Organism: Severe | GTCTTCTTGCATGTGACTTATGTCCCTGCACAAGAAAAGAAGCTTCACAACTGCTCCTGCC<br>***** | 24802 |
| gb:MT020781 | Organism: Severe | ATTTGTCATGATGGAAAAGCACACTTTCCTCGTGAAGGTGCTTTGTTCAAATGGCACA             | 24850 |
| gb:MT007544 | Organism: Severe | ATTTGTCATGATGGAAAAGCACACTTTCCTCGTGAAGGTGCTTTGTTCAAATGGCACA             | 24862 |
| gb:MN994467 | Organism: Severe | ATTTGTCATGATGGAAAAGCACACTTTCCTCGTGAAGGTGCTTTGTTCAAATGGCACA             | 24862 |
| gb:MT044257 | Organism: Severe | ATTTGTCATGATGGAAAAGCACACTTTCCTCGTGAAGGTGCTTTGTTCAAATGGCACA             | 24862 |
| gb:MT106054 | Organism: Severe | ATTTGTCATGATGGAAAAGCACACTTTCCTCGTGAAGGTGCTTTGTTCAAATGGCACA             | 24862 |
| gb:MT049951 | Organism: Severe | ATTTGTCATGATGGAAAAGCACACTTTCCTCGTGAAGGTGCTTTGTTCAAATGGCACA             | 24862 |
| gb:MN975262 | Organism: Severe | ATTTGTCATGATGGAAAAGCACACTTTCCTCGTGAAGGTGCTTTGTTCAAATGGCACA             | 24862 |
| gb:MT106052 | Organism: Severe | ATTTGTCATGATGGAAAAGCACACTTTCCTCGTGAAGGTGCTTTGTTCAAATGGCACA             | 24862 |
| gb:LC522975 | Organism: Severe | ATTTGTCATGATGGAAAAGCACACTTTCCTCGTGAAGGTGCTTTGTTCAAATGGCACA             | 24859 |
| gb:LC522973 | Organism: Severe | ATTTGTCATGATGGAAAAGCACACTTTCCTCGTGAAGGTGCTTTGTTCAAATGGCACA             | 24859 |
| gb:LC522974 | Organism: Severe | ATTTGTCATGATGGAAAAGCACACTTTCCTCGTGAAGGTGCTTTGTTCAAATGGCACA             | 24859 |
| gb:MN985325 | Organism: Severe | ATTTGTCATGATGGAAAAGCACACTTTCCTCGTGAAGGTGCTTTGTTCAAATGGCACA             | 24862 |
| gb:MT020881 | Organism: Severe | ATTTGTCATGATGGAAAAGCACACTTTCCTCGTGAAGGTGCTTTGTTCAAATGGCACA             | 24862 |
| gb:MT020880 | Organism: Severe | ATTTGTCATGATGGAAAAGCACACTTTCCTCGTGAAGGTGCTTTGTTCAAATGGCACA             | 24862 |
| gb:MT066175 | Organism: Severe | ATTTGTCATGATGGAAAAGCACACTTTCCTCGTGAAGGTGCTTTGTTCAAATGGCACA             | 24862 |
| gb:MN997409 | Organism: Severe | ATTTGTCATGATGGAAAAGCACACTTTCCTCGTGAAGGTGCTTTGTTCAAATGGCACA             | 24862 |
| gb:MN938384 | Organism: Severe | ATTTGTCATGATGGAAAAGCACACTTTCCTCGTGAAGGTGCTTTGTTCAAATGGCACA             | 24830 |
| gb:MT044258 | Organism: Severe | ATTTGTCATGATGGAAAAGCACACTTTCCTCGTGAAGGTGCTTTGTTCAAATGGCACA             | 24838 |
| gb:MT039890 | Organism: Severe | ATTTGTCATGATGGAAAAGCACACTTTCCTCGTGAAGGTGCTTTGTTCAAATGGCACA             | 24862 |
| gb:MN988713 | Organism: Severe | ATTTGTCATGATGGAAAAGCACACTTTCCTCGTGAAGGTGCTTTGTTCAAATGGCACA             | 24862 |
| gb:LC521925 | Organism: Severe | ATTTGTCATGATGGAAAAGCACACTTTCCTCGTGAAGGTGCTTTGTTCAAATGGCACA             | 24835 |
| gb:MT093571 | Organism: Severe | ATTTGTCATGATGGAAAAGCACACTTTCCTCGTGAAGGTGCTTTGTTCAAATGGCACA             | 24862 |
| gb:MT039887 | Organism: Severe | ATTTGTCATGATGGAAAAGCACACTTTCCTCGTGAAGGTGCTTTGTTCAAATGGCACA             | 24859 |
| gb:MT019530 | Organism: Severe | ATTTGTCATGATGGAAAAGCACACTTTCCTCGTGAAGGTGCTTTGTTCAAATGGCACA             | 24862 |
| gb:MT039888 | Organism: Severe | ATTTGTCATGATGGAAAAGCACACTTTCCTCGTGAAGGTGCTTTGTTCAAATGGCACA             | 24862 |
| gb:LC522972 | Organism: Severe | ATTTGTCATGATGGAAAAGCACACTTTCCTCGTGAAGGTGCTTTGTTCAAATGGCACA             | 24859 |
| gb:MT027063 | Organism: Severe | ATTTGTCATGATGGAAAAGCACACTTTCCTCGTGAAGGTGCTTTGTTCAAATGGCACA             | 24862 |
| gb:MT027062 | Organism: Severe | ATTTGTCATGATGGAAAAGCACACTTTCCTCGTGAAGGTGCTTTGTTCAAATGGCACA             | 24862 |
| gb:MT019529 | Organism: Severe | ATTTGTCATGATGGAAAAGCACACTTTCCTCGTGAAGGTGCTTTGTTCAAATGGCACA             | 24862 |
| gb:MN996529 | Organism: Severe | ATTTGTCATGATGGAAAAGCACACTTTCCTCGTGAAGGTGCTTTGTTCAAATGGCACA             | 24850 |
| gb:MN996531 | Organism: Severe | ATTTGTCATGATGGAAAAGCACACTTTCCTCGTGAAGGTGCTTTGTTCAAATGGCACA             | 24849 |
| gb:MT066176 | Organism: Severe | ATTTGTCATGATGGAAAAGCACACTTTCCTCGTGAAGGTGCTTTGTTCAAATGGCACA             | 24862 |
| gb:MT027064 | Organism: Severe | ATTTGTCATGATGGAAAAGCACACTTTCCTCGTGAAGGTGCTTTGTTCAAATGGCACA             | 24862 |
| gb:MN994468 | Organism: Severe | ATTTGTCATGATGGAAAAGCACACTTTCCTCGTGAAGGTGCTTTGTTCAAATGGCACA             | 24862 |
| gb:MT072688 | Organism: Severe | ATTTGTCATGATGGAAAAGCACACTTTCCTCGTGAAGGTGCTTTGTTCAAATGGCACA             | 24847 |
| gb:MN996527 | Organism: Severe | ATTTGTCATGATGGAAAAGCACACTTTCCTCGTGAAGGTGCTTTGTTCAAATGGCACA             | 24829 |
| gb:MT093631 | Organism: Severe | ATTTGTCATGATGGAAAAGCACACTTTCCTCGTGAAGGTGCTTTGTTCAAATGGCACA             | 24900 |
| gb:MT106053 | Organism: Severe | ATTTGTCATGATGGAAAAGCACACTTTCCTCGTGAAGGTGCTTTGTTCAAATGGCACA             | 24862 |
| gb:MT019533 | Organism: Severe | ATTTGTCATGATGGAAAAGCACACTTTCCTCGTGAAGGTGCTTTGTTCAAATGGCACA             | 24862 |
| gb:MT019531 | Organism: Severe | ATTTGTCATGATGGAAAAGCACACTTTCCTCGTGAAGGTGCTTTGTTCAAATGGCACA             | 24862 |
| gb:MN996528 | Organism: Severe | ATTTGTCATGATGGAAAAGCACACTTTCCTCGTGAAGGTGCTTTGTTCAAATGGCACA             | 24862 |
| gb:MN996530 | Organism: Severe | ATTTGTCATGATGGAAAAGCACACTTTCCTCGTGAAGGTGCTTTGTTCAAATGGCACA             | 24848 |
| gb:MN908947 | Organism: Severe | ATTTGTCATGATGGAAAAGCACACTTTCCTCGTGAAGGTGCTTTGTTCAAATGGCACA             | 24862 |
| gb:MT019532 | Organism: Severe | ATTTGTCATGATGGAAAAGCACACTTTCCTCGTGAAGGTGCTTTGTTCAAATGGCACA<br>*****    | 24862 |

|             |                  |                                                              |       |
|-------------|------------------|--------------------------------------------------------------|-------|
| gb:MT020781 | Organism: Severe | CACTGGTTTGTAAACACAAGGAATTTTTATGAACCACAAATCATTACTACAGACAACACA | 24910 |
| gb:MT007544 | Organism: Severe | CACTGGTTTGTAAACACAAGGAATTTTTATGAACCACAAATCATTACTACAGACAACACA | 24922 |
| gb:MN994467 | Organism: Severe | CACTGGTTTGTAAACACAAGGAATTTTTATGAACCACAAATCATTACTACAGACAACACA | 24922 |
| gb:MT044257 | Organism: Severe | CACTGGTTTGTAAACACAAGGAATTTTTATGAACCACAAATCATTACTACAGACAACACA | 24922 |
| gb:MT106054 | Organism: Severe | CACTGGTTTGTAAACACAAGGAATTTTTATGAACCACAAATCATTACTACAGACAACACA | 24922 |
| gb:MT049951 | Organism: Severe | CACTGGTTTGTAAACACAAGGAATTTTTATGAACCACAAATCATTACTACAGACAACACA | 24922 |
| gb:MN975262 | Organism: Severe | CACTGGTTTGTAAACACAAGGAATTTTTATGAACCACAAATCATTACTACAGACAACACA | 24922 |
| gb:MT106052 | Organism: Severe | CACTGGTTTGTAAACACAAGGAATTTTTATGAACCACAAATCATTACTACAGACAACACA | 24922 |
| gb:LC522975 | Organism: Severe | CACTGGTTTGTAAACACAAGGAATTTTTATGAACCACAAATCATTACTACAGACAACACA | 24919 |
| gb:LC522973 | Organism: Severe | CACTGGTTTGTAAACACAAGGAATTTTTATGAACCACAAATCATTACTACAGACAACACA | 24919 |
| gb:LC522974 | Organism: Severe | CACTGGTTTGTAAACACAAGGAATTTTTATGAACCACAAATCATTACTACAGACAACACA | 24919 |
| gb:MN985325 | Organism: Severe | CACTGGTTTGTAAACACAAGGAATTTTTATGAACCACAAATCATTACTACAGACAACACA | 24922 |
| gb:MT020881 | Organism: Severe | CACTGGTTTGTAAACACAAGGAATTTTTATGAACCACAAATCATTACTACAGACAACACA | 24922 |
| gb:MT020880 | Organism: Severe | CACTGGTTTGTAAACACAAGGAATTTTTATGAACCACAAATCATTACTACAGACAACACA | 24922 |
| gb:MT066175 | Organism: Severe | CACTGGTTTGTAAACACAAGGAATTTTTATGAACCACAAATCATTACTACAGACAACACA | 24922 |
| gb:MN997409 | Organism: Severe | CACTGGTTTGTAAACACAAGGAATTTTTATGAACCACAAATCATTACTACAGACAACACA | 24922 |

|             |                 |                                                               |       |
|-------------|-----------------|---------------------------------------------------------------|-------|
| gb:MN938384 | Organism:Severe | CACTGGTTTGTAAACACAAAGGAATTTTTATGAACCACAAATCATTACTACAGACAACACA | 24890 |
| gb:MT044258 | Organism:Severe | CACTGGTTTGTAAACACAAAGGAATTTTTATGAACCACAAATCATTACTACAGACAACACA | 24898 |
| gb:MT039890 | Organism:Severe | CACTGGTTTGTAAACACAAAGGAATTTTTATGAACCACAAATCATTACTACAGACAACACA | 24922 |
| gb:MN988713 | Organism:Severe | CACTGGTTTGTAAACACAAAGGAATTTTTATGAACCACAAATCATTACTACAGACAACACA | 24922 |
| gb:LC521925 | Organism:Severe | CACTGGTTTGTAAACACAAAGGAATTTTTATGAACCACAAATCATTACTACAGACAACACA | 24895 |
| gb:MT093571 | Organism:Severe | CACTGGTTTGTAAACACAAAGGAATTTTTATGAACCACAAATCATTACTACAGACAACACA | 24922 |
| gb:MT039887 | Organism:Severe | CACTGGTTTGTAAACACAAAGGAATTTTTATGAACCACAAATCATTACTACAGACAACACA | 24919 |
| gb:MT019530 | Organism:Severe | CACTGGTTTGTAAACACAAAGGAATTTTTATGAACCACAAATCATTACTACAGACAACACA | 24922 |
| gb:MT039888 | Organism:Severe | CACTGGTTTGTAAACACAAAGGAATTTTTATGAACCACAAATCATTACTACAGACAACACA | 24922 |
| gb:LC522972 | Organism:Severe | CACTGGTTTGTAAACACAAAGGAATTTTTATGAACCACAAATCATTACTACAGACAACACA | 24919 |
| gb:MT027063 | Organism:Severe | CACTGGTTTGTAAACACAAAGGAATTTTTATGAACCACAAATCATTACTACAGACAACACA | 24922 |
| gb:MT027062 | Organism:Severe | CACTGGTTTGTAAACACAAAGGAATTTTTATGAACCACAAATCATTACTACAGACAACACA | 24922 |
| gb:MT019529 | Organism:Severe | CACTGGTTTGTAAACACAAAGGAATTTTTATGAACCACAAATCATTACTACAGACAACACA | 24922 |
| gb:MN996529 | Organism:Severe | CACTGGTTTGTAAACACAAAGGAATTTTTATGAACCACAAATCATTACTACAGACAACACA | 24910 |
| gb:MN996531 | Organism:Severe | CACTGGTTTGTAAACACAAAGGAATTTTTATGAACCACAAATCATTACTACAGACAACACA | 24909 |
| gb:MT066176 | Organism:Severe | CACTGGTTTGTAAACACAAAGGAATTTTTATGAACCACAAATCATTACTACAGACAACACA | 24922 |
| gb:MT027064 | Organism:Severe | CACTGGTTTGTAAACACAAAGGAATTTTTATGAACCACAAATCATTACTACAGACAACACA | 24922 |
| gb:MN994468 | Organism:Severe | CACTGGTTTGTAAACACAAAGGAATTTTTATGAACCACAAATCATTACTACAGACAACACA | 24922 |
| gb:MT072688 | Organism:Severe | CACTGGTTTGTAAACACAAAGGAATTTTTATGAACCACAAATCATTACTACAGACAACACA | 24907 |
| gb:MN996527 | Organism:Severe | CACTGGTTTGTAAACACAAAGGAATTTTTATGAACCACAAATCATTACTACAGACAACACA | 24889 |
| gb:MT093631 | Organism:Severe | CACTGGTTTGTAAACACAAAGGAATTTTTATGAACCACAAATCATTACTACAGACAACACA | 24960 |
| gb:MT106053 | Organism:Severe | CACTGGTTTGTAAACACAAAGGAATTTTTATGAACCACAAATCATTACTACAGACAACACA | 24922 |
| gb:MT019533 | Organism:Severe | CACTGGTTTGTAAACACAAAGGAATTTTTATGAACCACAAATCATTACTACAGACAACACA | 24922 |
| gb:MT019531 | Organism:Severe | CACTGGTTTGTAAACACAAAGGAATTTTTATGAACCACAAATCATTACTACAGACAACACA | 24922 |
| gb:MN996528 | Organism:Severe | CACTGGTTTGTAAACACAAAGGAATTTTTATGAACCACAAATCATTACTACAGACAACACA | 24922 |
| gb:MN996530 | Organism:Severe | CACTGGTTTGTAAACACAAAGGAATTTTTATGAACCACAAATCATTACTACAGACAACACA | 24908 |
| gb:MN908947 | Organism:Severe | CACTGGTTTGTAAACACAAAGGAATTTTTATGAACCACAAATCATTACTACAGACAACACA | 24922 |
| gb:MT019532 | Organism:Severe | CACTGGTTTGTAAACACAAAGGAATTTTTATGAACCACAAATCATTACTACAGACAACACA | 24922 |

\*\*\*\*\*

|             |                 |                                                             |       |
|-------------|-----------------|-------------------------------------------------------------|-------|
| gb:MT020781 | Organism:Severe | TTTGTGCTGGTAACTGTGATGTTGTAATAGGAATTGTCAACAACACAGTTTATGATCCT | 24970 |
| gb:MT007544 | Organism:Severe | TTTGTGCTGGTAACTGTGATGTTGTAATAGGAATTGTCAACAACACAGTTTATGATCCT | 24982 |
| gb:MN994467 | Organism:Severe | TTTGTGCTGGTAACTGTGATGTTGTAATAGGAATTGTCAACAACACAGTTTATGATCCT | 24982 |
| gb:MT044257 | Organism:Severe | TTTGTGCTGGTAACTGTGATGTTGTAATAGGAATTGTCAACAACACAGTTTATGATCCT | 24982 |
| gb:MT106054 | Organism:Severe | TTTGTGCTGGTAACTGTGATGTTGTAATAGGAATTGTCAACAACACAGTTTATGATCCT | 24982 |
| gb:MT049951 | Organism:Severe | TTTGTGCTGGTAACTGTGATGTTGTAATAGGAATTGTCAACAACACAGTTTATGATCCT | 24982 |
| gb:MN975262 | Organism:Severe | TTTGTGCTGGTAACTGTGATGTTGTAATAGGAATTGTCAACAACACAGTTTATGATCCT | 24982 |
| gb:MT106052 | Organism:Severe | TTTGTGCTGGTAACTGTGATGTTGTAATAGGAATTGTCAACAACACAGTTTATGATCCT | 24982 |
| gb:LC522975 | Organism:Severe | TTTGTGCTGGTAACTGTGATGTTGTAATAGGAATTGTCAACAACACAGTTTATGATCCT | 24979 |
| gb:LC522973 | Organism:Severe | TTTGTGCTGGTAACTGTGATGTTGTAATAGGAATTGTCAACAACACAGTTTATGATCCT | 24979 |
| gb:LC522974 | Organism:Severe | TTTGTGCTGGTAACTGTGATGTTGTAATAGGAATTGTCAACAACACAGTTTATGATCCT | 24979 |
| gb:MN985325 | Organism:Severe | TTTGTGCTGGTAACTGTGATGTTGTAATAGGAATTGTCAACAACACAGTTTATGATCCT | 24982 |
| gb:MT020881 | Organism:Severe | TTTGTGCTGGTAACTGTGATGTTGTAATAGGAATTGTCAACAACACAGTTTATGATCCT | 24982 |
| gb:MT020880 | Organism:Severe | TTTGTGCTGGTAACTGTGATGTTGTAATAGGAATTGTCAACAACACAGTTTATGATCCT | 24982 |
| gb:MT066175 | Organism:Severe | TTTGTGCTGGTAACTGTGATGTTGTAATAGGAATTGTCAACAACACAGTTTATGATCCT | 24982 |
| gb:MN997409 | Organism:Severe | TTTGTGCTGGTAACTGTGATGTTGTAATAGGAATTGTCAACAACACAGTTTATGATCCT | 24982 |
| gb:MN938384 | Organism:Severe | TTTGTGCTGGTAACTGTGATGTTGTAATAGGAATTGTCAACAACACAGTTTATGATCCT | 24950 |
| gb:MT044258 | Organism:Severe | TTTGTGCTGGTAACTGTGATGTTGTAATAGGAATTGTCAACAACACAGTTTATGATCCT | 24958 |
| gb:MT039890 | Organism:Severe | TTTGTGCTGGTAACTGTGATGTTGTAATAGGAATTGTCAACAACACAGTTTATGATCCT | 24982 |
| gb:MN988713 | Organism:Severe | TTTGTGCTGGTAACTGTGATGTTGTAATAGGAATTGTCAACAACACAGTTTATGATCCT | 24982 |
| gb:LC521925 | Organism:Severe | TTTGTGCTGGTAACTGTGATGTTGTAATAGGAATTGTCAACAACACAGTTTATGATCCT | 24955 |
| gb:MT093571 | Organism:Severe | TTTGTGCTGGTAACTGTGATGTTGTAATAGGAATTGTCAACAACACAGTTTATGATCCT | 24982 |
| gb:MT039887 | Organism:Severe | TTTGTGCTGGTAACTGTGATGTTGTAATAGGAATTGTCAACAACACAGTTTATGATCCT | 24979 |
| gb:MT019530 | Organism:Severe | TTTGTGCTGGTAACTGTGATGTTGTAATAGGAATTGTCAACAACACAGTTTATGATCCT | 24982 |
| gb:MT039888 | Organism:Severe | TTTGTGCTGGTAACTGTGATGTTGTAATAGGAATTGTCAACAACACAGTTTATGATCCT | 24982 |
| gb:LC522972 | Organism:Severe | TTTGTGCTGGTAACTGTGATGTTGTAATAGGAATTGTCAACAACACAGTTTATGATCCT | 24979 |
| gb:MT027063 | Organism:Severe | TTTGTGCTGGTAACTGTGATGTTGTAATAGGAATTGTCAACAACACAGTTTATGATCCT | 24982 |
| gb:MT027062 | Organism:Severe | TTTGTGCTGGTAACTGTGATGTTGTAATAGGAATTGTCAACAACACAGTTTATGATCCT | 24982 |
| gb:MT019529 | Organism:Severe | TTTGTGCTGGTAACTGTGATGTTGTAATAGGAATTGTCAACAACACAGTTTATGATCCT | 24982 |
| gb:MN996529 | Organism:Severe | TTTGTGCTGGTAACTGTGATGTTGTAATAGGAATTGTCAACAACACAGTTTATGATCCT | 24970 |
| gb:MN996531 | Organism:Severe | TTTGTGCTGGTAACTGTGATGTTGTAATAGGAATTGTCAACAACACAGTTTATGATCCT | 24969 |
| gb:MT066176 | Organism:Severe | TTTGTGCTGGTAACTGTGATGTTGTAATAGGAATTGTCAACAACACAGTTTATGATCCT | 24982 |
| gb:MT027064 | Organism:Severe | TTTGTGCTGGTAACTGTGATGTTGTAATAGGAATTGTCAACAACACAGTTTATGATCCT | 24982 |
| gb:MN994468 | Organism:Severe | TTTGTGCTGGTAACTGTGATGTTGTAATAGGAATTGTCAACAACACAGTTTATGATCCT | 24982 |
| gb:MT072688 | Organism:Severe | TTTGTGCTGGTAACTGTGATGTTGTAATAGGAATTGTCAACAACACAGTTTATGATCCT | 24967 |



|             |                 |                                                              |       |
|-------------|-----------------|--------------------------------------------------------------|-------|
| gb:MN996527 | Organism:Severe | TTTGTGCTGGTAACCTGTGATGTTGTAATAGGAATTGTCAACAACACAGTTTATGATCCT | 24949 |
| gb:MT093631 | Organism:Severe | TTTGTGCTGGTAACCTGTGATGTTGTAATAGGAATTGTCAACAACACAGTTTATGATCCT | 25020 |
| gb:MT106053 | Organism:Severe | TTTGTGCTGGTAACCTGTGATGTTGTAATAGGAATTGTCAACAACACAGTTTATGATCCT | 24982 |
| gb:MT019533 | Organism:Severe | TTTGTGCTGGTAACCTGTGATGTTGTAATAGGAATTGTCAACAACACAGTTTATGATCCT | 24982 |
| gb:MT019531 | Organism:Severe | TTTGTGCTGGTAACCTGTGATGTTGTAATAGGAATTGTCAACAACACAGTTTATGATCCT | 24982 |
| gb:MN996528 | Organism:Severe | TTTGTGCTGGTAACCTGTGATGTTGTAATAGGAATTGTCAACAACACAGTTTATGATCCT | 24982 |
| gb:MN996530 | Organism:Severe | TTTGTGCTGGTAACCTGTGATGTTGTAATAGGAATTGTCAACAACACAGTTTATGATCCT | 24968 |
| gb:MN908947 | Organism:Severe | TTTGTGCTGGTAACCTGTGATGTTGTAATAGGAATTGTCAACAACACAGTTTATGATCCT | 24982 |
| gb:MT019532 | Organism:Severe | TTTGTGCTGGTAACCTGTGATGTTGTAATAGGAATTGTCAACAACACAGTTTATGATCCT | 24982 |

\*\*\*\*\*

|             |                 |                                                              |       |
|-------------|-----------------|--------------------------------------------------------------|-------|
| gb:MT020781 | Organism:Severe | TTGCAACCTGAATTAGACTCATTCAAGGAGGAGTTAGATAAATATTTTAAGAATCATACA | 25030 |
| gb:MT007544 | Organism:Severe | TTGCAACCTGAATTAGACTCATTCAAGGAGGAGTTAGATAAATATTTTAAGAATCATACA | 25042 |
| gb:MN994467 | Organism:Severe | TTGCAACCTGAATTAGACTCATTCAAGGAGGAGTTAGATAAATATTTTAAGAATCATACA | 25042 |
| gb:MT044257 | Organism:Severe | TTGCAACCTGAATTAGACTCATTCAAGGAGGAGTTAGATAAATATTTTAAGAATCATACA | 25042 |
| gb:MT106054 | Organism:Severe | TTGCAACCTGAATTAGACTCATTCAAGGAGGAGTTAGATAAATATTTTAAGAATCATACA | 25042 |
| gb:MT049951 | Organism:Severe | TTGCAACCTGAATTAGACTCATTCAAGGAGGAGTTAGATAAATATTTTAAGAATCATACA | 25042 |
| gb:MN975262 | Organism:Severe | TTGCAACCTGAATTAGACTCATTCAAGGAGGAGTTAGATAAATATTTTAAGAATCATACA | 25042 |
| gb:MT106052 | Organism:Severe | TTGCAACCTGAATTAGACTCATTCAAGGAGGAGTTAGATAAATATTTTAAGAATCATACA | 25042 |
| gb:LC522975 | Organism:Severe | TTGCAACCTGAATTAGACTCATTCAAGGAGGAGTTAGATAAATATTTTAAGAATCATACA | 25039 |
| gb:LC522973 | Organism:Severe | TTGCAACCTGAATTAGACTCATTCAAGGAGGAGTTAGATAAATATTTTAAGAATCATACA | 25039 |
| gb:LC522974 | Organism:Severe | TTGCAACCTGAATTAGACTCATTCAAGGAGGAGTTAGATAAATATTTTAAGAATCATACA | 25039 |
| gb:MN985325 | Organism:Severe | TTGCAACCTGAATTAGACTCATTCAAGGAGGAGTTAGATAAATATTTTAAGAATCATACA | 25042 |
| gb:MT020881 | Organism:Severe | TTGCAACCTGAATTAGACTCATTCAAGGAGGAGTTAGATAAATATTTTAAGAATCATACA | 25042 |
| gb:MT020880 | Organism:Severe | TTGCAACCTGAATTAGACTCATTCAAGGAGGAGTTAGATAAATATTTTAAGAATCATACA | 25042 |
| gb:MT066175 | Organism:Severe | TTGCAACCTGAATTAGACTCATTCAAGGAGGAGTTAGATAAATATTTTAAGAATCATACA | 25042 |
| gb:MN997409 | Organism:Severe | TTGCAACCTGAATTAGACTCATTCAAGGAGGAGTTAGATAAATATTTTAAGAATCATACA | 25042 |
| gb:MN938384 | Organism:Severe | TTGCAACCTGAATTAGACTCATTCAAGGAGGAGTTAGATAAATATTTTAAGAATCATACA | 25010 |
| gb:MT044258 | Organism:Severe | TTGCAACCTGAATTAGACTCATTCAAGGAGGAGTTAGATAAATATTTTAAGAATCATACA | 25018 |
| gb:MT039890 | Organism:Severe | TTGCAACCTGAATTAGACTCATTCAAGGAGGAGTTAGATAAATATTTTAAGAATCATACA | 25042 |
| gb:MN988713 | Organism:Severe | TTGCAACCTGAATTAGACTCATTCAAGGAGGAGTTAGATAAATATTTTAAGAATCATACA | 25042 |
| gb:LC521925 | Organism:Severe | TTGCAACCTGAATTAGACTCATTCAAGGAGGAGTTAGATAAATATTTTAAGAATCATACA | 25015 |
| gb:MT093571 | Organism:Severe | TTGCAACCTGAATTAGACTCATTCAAGGAGGAGTTAGATAAATATTTTAAGAATCATACA | 25042 |
| gb:MT039887 | Organism:Severe | TTGCAACCTGAATTAGACTCATTCAAGGAGGAGTTAGATAAATATTTTAAGAATCATACA | 25039 |
| gb:MT019530 | Organism:Severe | TTGCAACCTGAATTAGACTCATTCAAGGAGGAGTTAGATAAATATTTTAAGAATCATACA | 25042 |
| gb:MT039888 | Organism:Severe | TTGCAACCTGAATTAGACTCATTCAAGGAGGAGTTAGATAAATATTTTAAGAATCATACA | 25042 |
| gb:LC522972 | Organism:Severe | TTGCAACCTGAATTAGACTCATTCAAGGAGGAGTTAGATAAATATTTTAAGAATCATACA | 25039 |
| gb:MT027063 | Organism:Severe | TTGCAACCTGAATTAGACTCATTCAAGGAGGAGTTAGATAAATATTTTAAGAATCATACA | 25042 |
| gb:MT027062 | Organism:Severe | TTGCAACCTGAATTAGACTCATTCAAGGAGGAGTTAGATAAATATTTTAAGAATCATACA | 25042 |
| gb:MT019529 | Organism:Severe | TTGCAACCTGAATTAGACTCATTCAAGGAGGAGTTAGATAAATATTTTAAGAATCATACA | 25042 |
| gb:MN996529 | Organism:Severe | TTGCAACCTGAATTAGACTCATTCAAGGAGGAGTTAGATAAATATTTTAAGAATCATACA | 25030 |
| gb:MN996531 | Organism:Severe | TTGCAACCTGAATTAGACTCATTCAAGGAGGAGTTAGATAAATATTTTAAGAATCATACA | 25029 |
| gb:MT066176 | Organism:Severe | TTGCAACCTGAATTAGACTCATTCAAGGAGGAGTTAGATAAATATTTTAAGAATCATACA | 25042 |
| gb:MT027064 | Organism:Severe | TTGCAACCTGAATTAGACTCATTCAAGGAGGAGTTAGATAAATATTTTAAGAATCATACA | 25042 |
| gb:MN994468 | Organism:Severe | TTGCAACCTGAATTAGACTCATTCAAGGAGGAGTTAGATAAATATTTTAAGAATCATACA | 25042 |
| gb:MT072688 | Organism:Severe | TTGCAACCTGAATTAGACTCATTCAAGGAGGAGTTAGATAAATATTTTAAGAATCATACA | 25027 |
| gb:MN996527 | Organism:Severe | TTGCAACCTGAATTAGACTCATTCAAGGAGGAGTTAGATAAATATTTTAAGAATCATACA | 25009 |
| gb:MT093631 | Organism:Severe | TTGCAACCTGAATTAGACTCATTCAAGGAGGAGTTAGATAAATATTTTAAGAATCATACA | 25080 |
| gb:MT106053 | Organism:Severe | TTGCAACCTGAATTAGACTCATTCAAGGAGGAGTTAGATAAATATTTTAAGAATCATACA | 25042 |
| gb:MT019533 | Organism:Severe | TTGCAACCTGAATTAGACTCATTCAAGGAGGAGTTAGATAAATATTTTAAGAATCATACA | 25042 |
| gb:MT019531 | Organism:Severe | TTGCAACCTGAATTAGACTCATTCAAGGAGGAGTTAGATAAATATTTTAAGAATCATACA | 25042 |
| gb:MN996528 | Organism:Severe | TTGCAACCTGAATTAGACTCATTCAAGGAGGAGTTAGATAAATATTTTAAGAATCATACA | 25042 |
| gb:MN996530 | Organism:Severe | TTGCAACCTGAATTAGACTCATTCAAGGAGGAGTTAGATAAATATTTTAAGAATCATACA | 25028 |
| gb:MN908947 | Organism:Severe | TTGCAACCTGAATTAGACTCATTCAAGGAGGAGTTAGATAAATATTTTAAGAATCATACA | 25042 |
| gb:MT019532 | Organism:Severe | TTGCAACCTGAATTAGACTCATTCAAGGAGGAGTTAGATAAATATTTTAAGAATCATACA | 25042 |

\*\*\*\*\*

|             |                 |                                                              |       |
|-------------|-----------------|--------------------------------------------------------------|-------|
| gb:MT020781 | Organism:Severe | TCACCAGATGTTGATTTAGGTGACATCTCTGGCATTAAATGCTTCAGTTGTAACATTCAA | 25090 |
| gb:MT007544 | Organism:Severe | TCACCAGATGTTGATTTAGGTGACATCTCTGGCATTAAATGCTTCAGTTGTAACATTCAA | 25102 |
| gb:MN994467 | Organism:Severe | TCACCAGATGTTGATTTAGGTGACATCTCTGGCATTAAATGCTTCAGTTGTAACATTCAA | 25102 |
| gb:MT044257 | Organism:Severe | TCACCAGATGTTGATTTAGGTGACATCTCTGGCATTAAATGCTTCAGTTGTAACATTCAA | 25102 |
| gb:MT106054 | Organism:Severe | TCACCAGATGTTGATTTAGGTGACATCTCTGGCATTAAATGCTTCAGTTGTAACATTCAA | 25102 |
| gb:MT049951 | Organism:Severe | TCACCAGATGTTGATTTAGGTGACATCTCTGGCATTAAATGCTTCAGTTGTAACATTCAA | 25102 |
| gb:MN975262 | Organism:Severe | TCACCAGATGTTGATTTAGGTGACATCTCTGGCATTAAATGCTTCAGTTGTAACATTCAA | 25102 |
| gb:MT106052 | Organism:Severe | TCACCAGATGTTGATTTAGGTGACATCTCTGGCATTAAATGCTTCAGTTGTAACATTCAA | 25102 |

|             |                 |                                                                |       |
|-------------|-----------------|----------------------------------------------------------------|-------|
| gb:LC522975 | Organism:Severe | TCACCAGATGTTGATTTAGGTGACATCTCTGGCATTAAATGCTTCAGTTGTA AACATTCAA | 25099 |
| gb:LC522973 | Organism:Severe | TCACCAGATGTTGATTTAGGTGACATCTCTGGCATTAAATGCTTCAGTTGTA AACATTCAA | 25099 |
| gb:LC522974 | Organism:Severe | TCACCAGATGTTGATTTAGGTGACATCTCTGGCATTAAATGCTTCAGTTGTA AACATTCAA | 25099 |
| gb:MN985325 | Organism:Severe | TCACCAGATGTTGATTTAGGTGACATCTCTGGCATTAAATGCTTCAGTTGTA AACATTCAA | 25102 |
| gb:MT020881 | Organism:Severe | TCACCAGATGTTGATTTAGGTGACATCTCTGGCATTAAATGCTTCAGTTGTA AACATTCAA | 25102 |
| gb:MT020880 | Organism:Severe | TCACCAGATGTTGATTTAGGTGACATCTCTGGCATTAAATGCTTCAGTTGTA AACATTCAA | 25102 |
| gb:MT066175 | Organism:Severe | TCACCAGATGTTGATTTAGGTGACATCTCTGGCATTAAATGCTTCAGTTGTA AACATTCAA | 25102 |
| gb:MN997409 | Organism:Severe | TCACCAGATGTTGATTTAGGTGACATCTCTGGCATTAAATGCTTCAGTTGTA AACATTCAA | 25102 |
| gb:MN938384 | Organism:Severe | TCACCAGATGTTGATTTAGGTGACATCTCTGGCATTAAATGCTTCAGTTGTA AACATTCAA | 25070 |
| gb:MT044258 | Organism:Severe | TCACCAGATGTTGATTTAGGTGACATCTCTGGCATTAAATGCTTCAGTTGTA AACATTCAA | 25078 |
| gb:MT039890 | Organism:Severe | TCACCAGATGTTGATTTAGGTGACATCTCTGGCATTAAATGCTTCAGTTGTA AACATTCAA | 25102 |
| gb:MN988713 | Organism:Severe | TCACCAGATGTTGATTTAGGTGACATCTCTGGCATTAAATGCTTCAGTTGTA AACATTCAA | 25102 |
| gb:LC521925 | Organism:Severe | TCACCAGATGTTGATTTAGGTGACATCTCTGGCATTAAATGCTTCAGTTGTA AACATTCAA | 25075 |
| gb:MT093571 | Organism:Severe | TCACCAGATGTTGATTTAGGTGACATCTCTGGCATTAAATGCTTCAGTTGTA AACATTCAA | 25102 |
| gb:MT039887 | Organism:Severe | TCACCAGATGTTGATTTAGGTGACATCTCTGGCATTAAATGCTTCAGTTGTA AACATTCAA | 25099 |
| gb:MT019530 | Organism:Severe | TCACCAGATGTTGATTTAGGTGACATCTCTGGCATTAAATGCTTCAGTTGTA AACATTCAA | 25102 |
| gb:MT039888 | Organism:Severe | TCACCAGATGTTGATTTAGGTGACATCTCTGGCATTAAATGCTTCAGTTGTA AACATTCAA | 25102 |
| gb:LC522972 | Organism:Severe | TCACCAGATGTTGATTTAGGTGACATCTCTGGCATTAAATGCTTCAGTTGTA AACATTCAA | 25099 |
| gb:MT027063 | Organism:Severe | TCACCAGATGTTGATTTAGGTGACATCTCTGGCATTAAATGCTTCAGTTGTA AACATTCAA | 25102 |
| gb:MT027062 | Organism:Severe | TCACCAGATGTTGATTTAGGTGACATCTCTGGCATTAAATGCTTCAGTTGTA AACATTCAA | 25102 |
| gb:MT019529 | Organism:Severe | TCACCAGATGTTGATTTAGGTGACATCTCTGGCATTAAATGCTTCAGTTGTA AACATTCAA | 25102 |
| gb:MN996529 | Organism:Severe | TCACCAGATGTTGATTTAGGTGACATCTCTGGCATTAAATGCTTCAGTTGTA AACATTCAA | 25090 |
| gb:MN996531 | Organism:Severe | TCACCAGATGTTGATTTAGGTGACATCTCTGGCATTAAATGCTTCAGTTGTA AACATTCAA | 25089 |
| gb:MT066176 | Organism:Severe | TCACCAGATGTTGATTTAGGTGACATCTCTGGCATTAAATGCTTCAGTTGTA AACATTCAA | 25102 |
| gb:MT027064 | Organism:Severe | TCACCAGATGTTGATTTAGGTGACATCTCTGGCATTAAATGCTTCAGTTGTA AACATTCAA | 25102 |
| gb:MN994468 | Organism:Severe | TCACCAGATGTTGATTTAGGTGACATCTCTGGCATTAAATGCTTCAGTTGTA AACATTCAA | 25102 |
| gb:MT072688 | Organism:Severe | TCACCAGATGTTGATTTAGGTGACATCTCTGGCATTAAATGCTTCAGTTGTA AACATTCAA | 25087 |
| gb:MN996527 | Organism:Severe | TCACCAGATGTTGATTTAGGTGACATCTCTGGCATTAAATGCTTCAGTTGTA AACATTCAA | 25069 |
| gb:MT093631 | Organism:Severe | TCACCAGATGTTGATTTAGGTGACATCTCTGGCATTAAATGCTTCAGTTGTA AACATTCAA | 25140 |
| gb:MT106053 | Organism:Severe | TCACCAGATGTTGATTTAGGTGACATCTCTGGCATTAAATGCTTCAGTTGTA AACATTCAA | 25102 |
| gb:MT019533 | Organism:Severe | TCACCAGATGTTGATTTAGGTGACATCTCTGGCATTAAATGCTTCAGTTGTA AACATTCAA | 25102 |
| gb:MT019531 | Organism:Severe | TCACCAGATGTTGATTTAGGTGACATCTCTGGCATTAAATGCTTCAGTTGTA AACATTCAA | 25102 |
| gb:MN996528 | Organism:Severe | TCACCAGATGTTGATTTAGGTGACATCTCTGGCATTAAATGCTTCAGTTGTA AACATTCAA | 25102 |
| gb:MN996530 | Organism:Severe | TCACCAGATGTTGATTTAGGTGACATCTCTGGCATTAAATGCTTCAGTTGTA AACATTCAA | 25088 |
| gb:MN908947 | Organism:Severe | TCACCAGATGTTGATTTAGGTGACATCTCTGGCATTAAATGCTTCAGTTGTA AACATTCAA | 25102 |
| gb:MT019532 | Organism:Severe | TCACCAGATGTTGATTTAGGTGACATCTCTGGCATTAAATGCTTCAGTTGTA AACATTCAA | 25102 |

\*\*\*\*\*

|             |                 |                                                              |       |
|-------------|-----------------|--------------------------------------------------------------|-------|
| gb:MT020781 | Organism:Severe | AAAGAAATTGACCGCCTCAATGAGGTTGCCAAGAATTTAAATGAATCTCTCATCGATCTC | 25150 |
| gb:MT007544 | Organism:Severe | AAAGAAATTGACCGCCTCAATGAGGTTGCCAAGAATTTAAATGAATCTCTCATCGATCTC | 25162 |
| gb:MN994467 | Organism:Severe | AAAGAAATTGACCGCCTCAATGAGGTTGCCAAGAATTTAAATGAATCTCTCATCGATCTC | 25162 |
| gb:MT044257 | Organism:Severe | AAAGAAATTGACCGCCTCAATGAGGTTGCCAAGAATTTAAATGAATCTCTCATCGATCTC | 25162 |
| gb:MT106054 | Organism:Severe | AAAGAAATTGACCGCCTCAATGAGGTTGCCAAGAATTTAAATGAATCTCTCATCGATCTC | 25162 |
| gb:MT049951 | Organism:Severe | AAAGAAATTGACCGCCTCAATGAGGTTGCCAAGAATTTAAATGAATCTCTCATCGATCTC | 25162 |
| gb:MN975262 | Organism:Severe | AAAGAAATTGACCGCCTCAATGAGGTTGCCAAGAATTTAAATGAATCTCTCATCGATCTC | 25162 |
| gb:MT106052 | Organism:Severe | AAAGAAATTGACCGCCTCAATGAGGTTGCCAAGAATTTAAATGAATCTCTCATCGATCTC | 25162 |
| gb:LC522975 | Organism:Severe | AAAGAAATTGACCGCCTCAATGAGGTTGCCAAGAATTTAAATGAATCTCTCATCGATCTC | 25159 |
| gb:LC522973 | Organism:Severe | AAAGAAATTGACCGCCTCAATGAGGTTGCCAAGAATTTAAATGAATCTCTCATCGATCTC | 25159 |
| gb:LC522974 | Organism:Severe | AAAGAAATTGACCGCCTCAATGAGGTTGCCAAGAATTTAAATGAATCTCTCATCGATCTC | 25159 |
| gb:MN985325 | Organism:Severe | AAAGAAATTGACCGCCTCAATGAGGTTGCCAAGAATTTAAATGAATCTCTCATCGATCTC | 25162 |
| gb:MT020881 | Organism:Severe | AAAGAAATTGACCGCCTCAATGAGGTTGCCAAGAATTTAAATGAATCTCTCATCGATCTC | 25162 |
| gb:MT020880 | Organism:Severe | AAAGAAATTGACCGCCTCAATGAGGTTGCCAAGAATTTAAATGAATCTCTCATCGATCTC | 25162 |
| gb:MT066175 | Organism:Severe | AAAGAAATTGACCGCCTCAATGAGGTTGCCAAGAATTTAAATGAATCTCTCATCGATCTC | 25162 |
| gb:MN997409 | Organism:Severe | AAAGAAATTGACCGCCTCAATGAGGTTGCCAAGAATTTAAATGAATCTCTCATCGATCTC | 25162 |
| gb:MN938384 | Organism:Severe | AAAGAAATTGACCGCCTCAATGAGGTTGCCAAGAATTTAAATGAATCTCTCATCGATCTC | 25130 |
| gb:MT044258 | Organism:Severe | AAAGAAATTGACCGCCTCAATGAGGTTGCCAAGAATTTAAATGAATCTCTCATCGATCTC | 25138 |
| gb:MT039890 | Organism:Severe | AAAGAAATTGACCGCCTCAATGAGGTTGCCAAGAATTTAAATGAATCTCTCATCGATCTC | 25162 |
| gb:MN988713 | Organism:Severe | AAAGAAATTGACCGCCTCAATGAGGTTGCCAAGAATTTAAATGAATCTCTCATCGATCTC | 25162 |
| gb:LC521925 | Organism:Severe | AAAGAAATTGACCGCCTCAATGAGGTTGCCAAGAATTTAAATGAATCTCTCATCGATCTC | 25135 |
| gb:MT093571 | Organism:Severe | AAAGAAATTGACCGCCTCAATGAGGTTGCCAAGAATTTAAATGAATCTCTCATCGATCTC | 25162 |
| gb:MT039887 | Organism:Severe | AAAGAAATTGACCGCCTCAATGAGGTTGCCAAGAATTTAAATGAATCTCTCATCGATCTC | 25159 |
| gb:MT019530 | Organism:Severe | AAAGAAATTGACCGCCTCAATGAGGTTGCCAAGAATTTAAATGAATCTCTCATCGATCTC | 25162 |
| gb:MT039888 | Organism:Severe | AAAGAAATTGACCGCCTCAATGAGGTTGCCAAGAATTTAAATGAATCTCTCATCGATCTC | 25162 |
| gb:LC522972 | Organism:Severe | AAAGAAATTGACCGCCTCAATGAGGTTGCCAAGAATTTAAATGAATCTCTCATCGATCTC | 25159 |
| gb:MT027063 | Organism:Severe | AAAGAAATTGACCGCCTCAATGAGGTTGCCAAGAATTTAAATGAATCTCTCATCGATCTC | 25162 |

|             |                  |                                                              |       |
|-------------|------------------|--------------------------------------------------------------|-------|
| gb:MT027062 | Organism: Severe | AAAGAAATTGACCGCCTCAATGAGGTTGCCAAGAATTTAAATGAATCTCTCATCGATCTC | 25162 |
| gb:MT019529 | Organism: Severe | AAAGAAATTGACCGCCTCAATGAGGTTGCCAAGAATTTAAATGAATCTCTCATCGATCTC | 25162 |
| gb:MN996529 | Organism: Severe | AAAGAAATTGACCGCCTCAATGAGGTTGCCAAGAATTTAAATGAATCTCTCATCGATCTC | 25150 |
| gb:MN996531 | Organism: Severe | AAAGAAATTGACCGCCTCAATGAGGTTGCCAAGAATTTAAATGAATCTCTCATCGATCTC | 25149 |
| gb:MT066176 | Organism: Severe | AAAGAAATTGACCGCCTCAATGAGGTTGCCAAGAATTTAAATGAATCTCTCATCGATCTC | 25162 |
| gb:MT027064 | Organism: Severe | AAAGAAATTGACCGCCTCAATGAGGTTGCCAAGAATTTAAATGAATCTCTCATCGATCTC | 25162 |
| gb:MN994468 | Organism: Severe | AAAGAAATTGACCGCCTCAATGAGGTTGCCAAGAATTTAAATGAATCTCTCATCGATCTC | 25162 |
| gb:MT072688 | Organism: Severe | AAAGAAATTGACCGCCTCAATGAGGTTGCCAAGAATTTAAATGAATCTCTCATCGATCTC | 25147 |
| gb:MN996527 | Organism: Severe | AAAGAAATTGACCGCCTCAATGAGGTTGCCAAGAATTTAAATGAATCTCTCATCGATCTC | 25129 |
| gb:MT093631 | Organism: Severe | AAAGAAATTGACCGCCTCAATGAGGTTGCCAAGAATTTAAATGAATCTCTCATCGATCTC | 25200 |
| gb:MT106053 | Organism: Severe | AAAGAAATTGACCGCCTCAATGAGGTTGCCAAGAATTTAAATGAATCTCTCATCGATCTC | 25162 |
| gb:MT019533 | Organism: Severe | AAAGAAATTGACCGCCTCAATGAGGTTGCCAAGAATTTAAATGAATCTCTCATCGATCTC | 25162 |
| gb:MT019531 | Organism: Severe | AAAGAAATTGACCGCCTCAATGAGGTTGCCAAGAATTTAAATGAATCTCTCATCGATCTC | 25162 |
| gb:MN996528 | Organism: Severe | AAAGAAATTGACCGCCTCAATGAGGTTGCCAAGAATTTAAATGAATCTCTCATCGATCTC | 25162 |
| gb:MN996530 | Organism: Severe | AAAGAAATTGACCGCCTCAATGAGGTTGCCAAGAATTTAAATGAATCTCTCATCGATCTC | 25148 |
| gb:MN908947 | Organism: Severe | AAAGAAATTGACCGCCTCAATGAGGTTGCCAAGAATTTAAATGAATCTCTCATCGATCTC | 25162 |
| gb:MT019532 | Organism: Severe | AAAGAAATTGACCGCCTCAATGAGGTTGCCAAGAATTTAAATGAATCTCTCATCGATCTC | 25162 |

\*\*\*\*\*

|             |                  |                                                             |       |
|-------------|------------------|-------------------------------------------------------------|-------|
| gb:MT020781 | Organism: Severe | CAAGAACTTGAAAGTATGAGCAGTATATAAAATGGCCATGGTACATTTGGCTAGGTTTT | 25210 |
| gb:MT007544 | Organism: Severe | CAAGAACTTGAAAGTATGAGCAGTATATAAAATGGCCATGGTACATTTGGCTAGGTTTT | 25222 |
| gb:MN994467 | Organism: Severe | CAAGAACTTGAAAGTATGAGCAGTATATAAAATGGCCATGGTACATTTGGCTAGGTTTT | 25222 |
| gb:MT044257 | Organism: Severe | CAAGAACTTGAAAGTATGAGCAGTATATAAAATGGCCATGGTACATTTGGCTAGGTTTT | 25222 |
| gb:MT106054 | Organism: Severe | CAAGAACTTGAAAGTATGAGCAGTATATAAAATGGCCATGGTACATTTGGCTAGGTTTT | 25222 |
| gb:MT049951 | Organism: Severe | CAAGAACTTGAAAGTATGAGCAGTATATAAAATGGCCATGGTACATTTGGCTAGGTTTT | 25222 |
| gb:MN975262 | Organism: Severe | CAAGAACTTGAAAGTATGAGCAGTATATAAAATGGCCATGGTACATTTGGCTAGGTTTT | 25222 |
| gb:MT106052 | Organism: Severe | CAAGAACTTGAAAGTATGAGCAGTATATAAAATGGCCATGGTACATTTGGCTAGGTTTT | 25222 |
| gb:LC522975 | Organism: Severe | CAAGAACTTGAAAGTATGAGCAGTATATAAAATGGCCATGGTACATTTGGCTAGGTTTT | 25219 |
| gb:LC522973 | Organism: Severe | CAAGAACTTGAAAGTATGAGCAGTATATAAAATGGCCATGGTACATTTGGCTAGGTTTT | 25219 |
| gb:LC522974 | Organism: Severe | CAAGAACTTGAAAGTATGAGCAGTATATAAAATGGCCATGGTACATTTGGCTAGGTTTT | 25219 |
| gb:MN985325 | Organism: Severe | CAAGAACTTGAAAGTATGAGCAGTATATAAAATGGCCATGGTACATTTGGCTAGGTTTT | 25222 |
| gb:MT020881 | Organism: Severe | CAAGAACTTGAAAGTATGAGCAGTATATAAAATGGCCATGGTACATTTGGCTAGGTTTT | 25222 |
| gb:MT020880 | Organism: Severe | CAAGAACTTGAAAGTATGAGCAGTATATAAAATGGCCATGGTACATTTGGCTAGGTTTT | 25222 |
| gb:MT066175 | Organism: Severe | CAAGAACTTGAAAGTATGAGCAGTATATAAAATGGCCATGGTACATTTGGCTAGGTTTT | 25222 |
| gb:MN997409 | Organism: Severe | CAAGAACTTGAAAGTATGAGCAGTATATAAAATGGCCATGGTACATTTGGCTAGGTTTT | 25222 |
| gb:MN938384 | Organism: Severe | CAAGAACTTGAAAGTATGAGCAGTATATAAAATGGCCATGGTACATTTGGCTAGGTTTT | 25190 |
| gb:MT044258 | Organism: Severe | CAAGAACTTGAAAGTATGAGCAGTATATAAAATGGCCATGGTACATTTGGCTAGGTTTT | 25198 |
| gb:MT039890 | Organism: Severe | CAAGAACTTGAAAGTATGAGCAGTATATAAAATGGCCATGGTACATTTGGCTAGGTTTT | 25222 |
| gb:MN988713 | Organism: Severe | CAAGAACTTGAAAGTATGAGCAGTATATAAAATGGCCATGGTACATTTGGCTAGGTTTT | 25222 |
| gb:LC521925 | Organism: Severe | CAAGAACTTGAAAGTATGAGCAGTATATAAAATGGCCATGGTACATTTGGCTAGGTTTT | 25195 |
| gb:MT093571 | Organism: Severe | CAAGAACTTGAAAGTATGAGCAGTATATAAAATGGCCATGGTACATTTGGCTAGGTTTT | 25222 |
| gb:MT039887 | Organism: Severe | CAAGAACTTGAAAGTATGAGCAGTATATAAAATGGCCATGGTACATTTGGCTAGGTTTT | 25219 |
| gb:MT019530 | Organism: Severe | CAAGAACTTGAAAGTATGAGCAGTATATAAAATGGCCATGGTACATTTGGCTAGGTTTT | 25222 |
| gb:MT039888 | Organism: Severe | CAAGAACTTGAAAGTATGAGCAGTATATAAAATGGCCATGGTACATTTGGCTAGGTTTT | 25222 |
| gb:LC522972 | Organism: Severe | CAAGAACTTGAAAGTATGAGCAGTATATAAAATGGCCATGGTACATTTGGCTAGGTTTT | 25219 |
| gb:MT027063 | Organism: Severe | CAAGAACTTGAAAGTATGAGCAGTATATAAAATGGCCATGGTACATTTGGCTAGGTTTT | 25222 |
| gb:MT027062 | Organism: Severe | CAAGAACTTGAAAGTATGAGCAGTATATAAAATGGCCATGGTACATTTGGCTAGGTTTT | 25222 |
| gb:MT019529 | Organism: Severe | CAAGAACTTGAAAGTATGAGCAGTATATAAAATGGCCATGGTACATTTGGCTAGGTTTT | 25222 |
| gb:MN996529 | Organism: Severe | CAAGAACTTGAAAGTATGAGCAGTATATAAAATGGCCATGGTACATTTGGCTAGGTTTT | 25210 |
| gb:MN996531 | Organism: Severe | CAAGAACTTGAAAGTATGAGCAGTATATAAAATGGCCATGGTACATTTGGCTAGGTTTT | 25209 |
| gb:MT066176 | Organism: Severe | CAAGAACTTGAAAGTATGAGCAGTATATAAAATGGCCATGGTACATTTGGCTAGGTTTT | 25222 |
| gb:MT027064 | Organism: Severe | CAAGAACTTGAAAGTATGAGCAGTATATAAAATGGCCATGGTACATTTGGCTAGGTTTT | 25222 |
| gb:MN994468 | Organism: Severe | CAAGAACTTGAAAGTATGAGCAGTATATAAAATGGCCATGGTACATTTGGCTAGGTTTT | 25222 |
| gb:MT072688 | Organism: Severe | CAAGAACTTGAAAGTATGAGCAGTATATAAAATGGCCATGGTACATTTGGCTAGGTTTT | 25207 |
| gb:MN996527 | Organism: Severe | CAAGAACTTGAAAGTATGAGCAGTATATAAAATGGCCATGGTACATTTGGCTAGGTTTT | 25189 |
| gb:MT093631 | Organism: Severe | CAAGAACTTGAAAGTATGAGCAGTATATAAAATGGCCATGGTACATTTGGCTAGGTTTT | 25260 |
| gb:MT106053 | Organism: Severe | CAAGAACTTGAAAGTATGAGCAGTATATAAAATGGCCATGGTACATTTGGCTAGGTTTT | 25222 |
| gb:MT019533 | Organism: Severe | CAAGAACTTGAAAGTATGAGCAGTATATAAAATGGCCATGGTACATTTGGCTAGGTTTT | 25222 |
| gb:MT019531 | Organism: Severe | CAAGAACTTGAAAGTATGAGCAGTATATAAAATGGCCATGGTACATTTGGCTAGGTTTT | 25222 |
| gb:MN996528 | Organism: Severe | CAAGAACTTGAAAGTATGAGCAGTATATAAAATGGCCATGGTACATTTGGCTAGGTTTT | 25222 |
| gb:MN996530 | Organism: Severe | CAAGAACTTGAAAGTATGAGCAGTATATAAAATGGCCATGGTACATTTGGCTAGGTTTT | 25208 |
| gb:MN908947 | Organism: Severe | CAAGAACTTGAAAGTATGAGCAGTATATAAAATGGCCATGGTACATTTGGCTAGGTTTT | 25222 |
| gb:MT019532 | Organism: Severe | CAAGAACTTGAAAGTATGAGCAGTATATAAAATGGCCATGGTACATTTGGCTAGGTTTT | 25222 |

\*\*\*\*\*

|             |                 |                                                              |       |
|-------------|-----------------|--------------------------------------------------------------|-------|
| gb:MT020781 | Organism:Severe | ATAGCTGGCTTGATTGCCATAGTAATGGTGACAATTATGCTTTGCTGTATGACCAGTTGC | 25270 |
| gb:MT007544 | Organism:Severe | ATAGCTGGCTTGATTGCCATAGTAATGGTGACAATTATGCTTTGCTGTATGACCAGTTGC | 25282 |
| gb:MN994467 | Organism:Severe | ATAGCTGGCTTGATTGCCATAGTAATGGTGACAATTATGCTTTGCTGTATGACCAGTTGC | 25282 |
| gb:MT044257 | Organism:Severe | ATAGCTGGCTTGATTGCCATAGTAATGGTGACAATTATGCTTTGCTGTATGACCAGTTGC | 25282 |
| gb:MT106054 | Organism:Severe | ATAGCTGGCTTGATTGCCATAGTAATGGTGACAATTATGCTTTGCTGTATGACCAGTTGC | 25282 |
| gb:MT049951 | Organism:Severe | ATAGCTGGCTTGATTGCCATAGTAATGGTGACAATTATGCTTTGCTGTATGACCAGTTGC | 25282 |
| gb:MN975262 | Organism:Severe | ATAGCTGGCTTGATTGCCATAGTAATGGTGACAATTATGCTTTGCTGTATGACCAGTTGC | 25282 |
| gb:MT106052 | Organism:Severe | ATAGCTGGCTTGATTGCCATAGTAATGGTGACAATTATGCTTTGCTGTATGACCAGTTGC | 25282 |
| gb:LC522975 | Organism:Severe | ATAGCTGGCTTGATTGCCATAGTAATGGTGACAATTATGCTTTGCTGTATGACCAGTTGC | 25279 |
| gb:LC522973 | Organism:Severe | ATAGCTGGCTTGATTGCCATAGTAATGGTGACAATTATGCTTTGCTGTATGACCAGTTGC | 25279 |
| gb:LC522974 | Organism:Severe | ATAGCTGGCTTGATTGCCATAGTAATGGTGACAATTATGCTTTGCTGTATGACCAGTTGC | 25279 |
| gb:MN985325 | Organism:Severe | ATAGCTGGCTTGATTGCCATAGTAATGGTGACAATTATGCTTTGCTGTATGACCAGTTGC | 25282 |
| gb:MT020881 | Organism:Severe | ATAGCTGGCTTGATTGCCATAGTAATGGTGACAATTATGCTTTGCTGTATGACCAGTTGC | 25282 |
| gb:MT020880 | Organism:Severe | ATAGCTGGCTTGATTGCCATAGTAATGGTGACAATTATGCTTTGCTGTATGACCAGTTGC | 25282 |
| gb:MT066175 | Organism:Severe | ATAGCTGGCTTGATTGCCATAGTAATGGTGACAATTATGCTTTGCTGTATGACCAGTTGC | 25282 |
| gb:MN997409 | Organism:Severe | ATAGCTGGCTTGATTGCCATAGTAATGGTGACAATTATGCTTTGCTGTATGACCAGTTGC | 25282 |
| gb:MN938384 | Organism:Severe | ATAGCTGGCTTGATTGCCATAGTAATGGTGACAATTATGCTTTGCTGTATGACCAGTTGC | 25250 |
| gb:MT044258 | Organism:Severe | ATAGCTGGCTTGATTGCCATAGTAATGGTGACAATTATGCTTTGCTGTATGACCAGTTGC | 25258 |
| gb:MT039890 | Organism:Severe | ATAGCTGGCTTGATTGCCATAGTAATGGTGACAATTATGCTTTGCTGTATGACCAGTTGC | 25282 |
| gb:MN988713 | Organism:Severe | ATAGCTGGCTTGATTGCCATAGTAATGGTGACAATTATGCTTTGCTGTATGACCAGTTGC | 25282 |
| gb:LC521925 | Organism:Severe | ATAGCTGGCTTGATTGCCATAGTAATGGTGACAATTATGCTTTGCTGTATGACCAGTTGC | 25255 |
| gb:MT093571 | Organism:Severe | ATAGCTGGCTTGATTGCCATAGTAATGGTGACAATTATGCTTTGCTGTATGACCAGTTGC | 25282 |
| gb:MT039887 | Organism:Severe | ATAGCTGGCTTGATTGCCATAGTAATGGTGACAATTATGCTTTGCTGTATGACCAGTTGC | 25279 |
| gb:MT019530 | Organism:Severe | ATAGCTGGCTTGATTGCCATAGTAATGGTGACAATTATGCTTTGCTGTATGACCAGTTGC | 25282 |
| gb:MT039888 | Organism:Severe | ATAGCTGGCTTGATTGCCATAGTAATGGTGACAATTATGCTTTGCTGTATGACCAGTTGC | 25282 |
| gb:LC522972 | Organism:Severe | ATAGCTGGCTTGATTGCCATAGTAATGGTGACAATTATGCTTTGCTGTATGACCAGTTGC | 25279 |
| gb:MT027063 | Organism:Severe | ATAGCTGGCTTGATTGCCATAGTAATGGTGACAATTATGCTTTGCTGTATGACCAGTTGC | 25282 |
| gb:MT027062 | Organism:Severe | ATAGCTGGCTTGATTGCCATAGTAATGGTGACAATTATGCTTTGCTGTATGACCAGTTGC | 25282 |
| gb:MT019529 | Organism:Severe | ATAGCTGGCTTGATTGCCATAGTAATGGTGACAATTATGCTTTGCTGTATGACCAGTTGC | 25282 |
| gb:MN996529 | Organism:Severe | ATAGCTGGCTTGATTGCCATAGTAATGGTGACAATTATGCTTTGCTGTATGACCAGTTGC | 25270 |
| gb:MN996531 | Organism:Severe | ATAGCTGGCTTGATTGCCATAGTAATGGTGACAATTATGCTTTGCTGTATGACCAGTTGC | 25269 |
| gb:MT066176 | Organism:Severe | ATAGCTGGCTTGATTGCCATAGTAATGGTGACAATTATGCTTTGCTGTATGACCAGTTGC | 25282 |
| gb:MT027064 | Organism:Severe | ATAGCTGGCTTGATTGCCATAGTAATGGTGACAATTATGCTTTGCTGTATGACCAGTTGC | 25282 |
| gb:MN994468 | Organism:Severe | ATAGCTGGCTTGATTGCCATAGTAATGGTGACAATTATGCTTTGCTGTATGACCAGTTGC | 25282 |
| gb:MT072688 | Organism:Severe | ATAGCTGGCTTGATTGCCATAGTAATGGTGACAATTATGCTTTGCTGTATGACCAGTTGC | 25267 |
| gb:MN996527 | Organism:Severe | ATAGCTGGCTTGATTGCCATAGTAATGGTGACAATTATGCTTTGCTGTATGACCAGTTGC | 25249 |
| gb:MT093631 | Organism:Severe | ATAGCTGGCTTGATTGCCATAGTAATGGTGACAATTATGCTTTGCTGTATGACCAGTTGC | 25320 |
| gb:MT106053 | Organism:Severe | ATAGCTGGCTTGATTGCCATAGTAATGGTGACAATTATGCTTTGCTGTATGACCAGTTGC | 25282 |
| gb:MT019533 | Organism:Severe | ATAGCTGGCTTGATTGCCATAGTAATGGTGACAATTATGCTTTGCTGTATGACCAGTTGC | 25282 |
| gb:MT019531 | Organism:Severe | ATAGCTGGCTTGATTGCCATAGTAATGGTGACAATTATGCTTTGCTGTATGACCAGTTGC | 25282 |
| gb:MN996528 | Organism:Severe | ATAGCTGGCTTGATTGCCATAGTAATGGTGACAATTATGCTTTGCTGTATGACCAGTTGC | 25282 |
| gb:MN996530 | Organism:Severe | ATAGCTGGCTTGATTGCCATAGTAATGGTGACAATTATGCTTTGCTGTATGACCAGTTGC | 25268 |
| gb:MN908947 | Organism:Severe | ATAGCTGGCTTGATTGCCATAGTAATGGTGACAATTATGCTTTGCTGTATGACCAGTTGC | 25282 |
| gb:MT019532 | Organism:Severe | ATAGCTGGCTTGATTGCCATAGTAATGGTGACAATTATGCTTTGCTGTATGACCAGTTGC | 25282 |

\*\*\*\*\*

|             |                 |                                                             |       |
|-------------|-----------------|-------------------------------------------------------------|-------|
| gb:MT020781 | Organism:Severe | TGTAGTTGCTCAAGGGCTGTTGTTCTTGTGGATCCTGCTGCAAATTTGATGAAGACGAC | 25330 |
| gb:MT007544 | Organism:Severe | TGTAGTTGCTCAAGGGCTGTTGTTCTTGTGGATCCTGCTGCAAATTTGATGAAGACGAC | 25342 |
| gb:MN994467 | Organism:Severe | TGTAGTTGCTCAAGGGCTGTTGTTCTTGTGGATCCTGCTGCAAATTTGATGAAGACGAC | 25342 |
| gb:MT044257 | Organism:Severe | TGTAGTTGCTCAAGGGCTGTTGTTCTTGTGGATCCTGCTGCAAATTTGATGAAGACGAC | 25342 |
| gb:MT106054 | Organism:Severe | TGTAGTTGCTCAAGGGCTGTTGTTCTTGTGGATCCTGCTGCAAATTTGATGAAGACGAC | 25342 |
| gb:MT049951 | Organism:Severe | TGTAGTTGCTCAAGGGCTGTTGTTCTTGTGGATCCTGCTGCAAATTTGATGAAGACGAC | 25342 |
| gb:MN975262 | Organism:Severe | TGTAGTTGCTCAAGGGCTGTTGTTCTTGTGGATCCTGCTGCAAATTTGATGAAGACGAC | 25342 |
| gb:MT106052 | Organism:Severe | TGTAGTTGCTCAAGGGCTGTTGTTCTTGTGGATCCTGCTGCAAATTTGATGAAGACGAC | 25342 |
| gb:LC522975 | Organism:Severe | TGTAGTTGCTCAAGGGCTGTTGTTCTTGTGGATCCTGCTGCAAATTTGATGAAGACGAC | 25339 |
| gb:LC522973 | Organism:Severe | TGTAGTTGCTCAAGGGCTGTTGTTCTTGTGGATCCTGCTGCAAATTTGATGAAGACGAC | 25339 |
| gb:LC522974 | Organism:Severe | TGTAGTTGCTCAAGGGCTGTTGTTCTTGTGGATCCTGCTGCAAATTTGATGAAGACGAC | 25339 |
| gb:MN985325 | Organism:Severe | TGTAGTTGCTCAAGGGCTGTTGTTCTTGTGGATCCTGCTGCAAATTTGATGAAGACGAC | 25342 |
| gb:MT020881 | Organism:Severe | TGTAGTTGCTCAAGGGCTGTTGTTCTTGTGGATCCTGCTGCAAATTTGATGAAGACGAC | 25342 |
| gb:MT020880 | Organism:Severe | TGTAGTTGCTCAAGGGCTGTTGTTCTTGTGGATCCTGCTGCAAATTTGATGAAGACGAC | 25342 |
| gb:MT066175 | Organism:Severe | TGTAGTTGCTCAAGGGCTGTTGTTCTTGTGGATCCTGCTGCAAATTTGATGAAGACGAC | 25342 |
| gb:MN997409 | Organism:Severe | TGTAGTTGCTCAAGGGCTGTTGTTCTTGTGGATCCTGCTGCAAATTTGATGAAGACGAC | 25342 |
| gb:MN938384 | Organism:Severe | TGTAGTTGCTCAAGGGCTGTTGTTCTTGTGGATCCTGCTGCAAATTTGATGAAGACGAC | 25310 |
| gb:MT044258 | Organism:Severe | TGTAGTTGCTCAAGGGCTGTTGTTCTTGTGGATCCTGCTGCAAATTTGATGAAGACGAC | 25318 |
| gb:MT039890 | Organism:Severe | TGTAGTTGCTCAAGGGCTGTTGTTCTTGTGGATCCTGCTGCAAATTTGATGAAGACGAC | 25342 |

|             |                 |                                                              |       |
|-------------|-----------------|--------------------------------------------------------------|-------|
| gb:MN988713 | Organism:Severe | TGTAGTTGTCTCAAGGGCTGTTGTTCTTGTGGATCCTGCTGCAAATTTGATGAAGACGAC | 25342 |
| gb:LC521925 | Organism:Severe | TGTAGTTGTCTCAAGGGCTGTTGTTCTTGTGGATCCTGCTGCAAATTTGATGAAGACGAC | 25315 |
| gb:MT093571 | Organism:Severe | TGTAGTTGTCTCAAGGGCTGTTGTTCTTGTGGATCCTGCTGCAAATTTGATGAAGACGAC | 25342 |
| gb:MT039887 | Organism:Severe | TGTAGTTGTCTCAAGGGCTGTTGTTCTTGTGGATCCTGCTGCAAATTTGATGAAGACGAC | 25339 |
| gb:MT019530 | Organism:Severe | TGTAGTTGTCTCAAGGGCTGTTGTTCTTGTGGATCCTGCTGCAAATTTGATGAAGACGAC | 25342 |
| gb:MT039888 | Organism:Severe | TGTAGTTGTCTCAAGGGCTGTTGTTCTTGTGGATCCTGCTGCAAATTTGATGAAGACGAC | 25342 |
| gb:LC522972 | Organism:Severe | TGTAGTTGTCTCAAGGGCTGTTGTTCTTGTGGATCCTGCTGCAAATTTGATGAAGACGAC | 25339 |
| gb:MT027063 | Organism:Severe | TGTAGTTGTCTCAAGGGCTGTTGTTCTTGTGGATCCTGCTGCAAATTTGATGAAGACGAC | 25342 |
| gb:MT027062 | Organism:Severe | TGTAGTTGTCTCAAGGGCTGTTGTTCTTGTGGATCCTGCTGCAAATTTGATGAAGACGAC | 25342 |
| gb:MT019529 | Organism:Severe | TGTAGTTGTCTCAAGGGCTGTTGTTCTTGTGGATCCTGCTGCAAATTTGATGAAGACGAC | 25342 |
| gb:MN996529 | Organism:Severe | TGTAGTTGTCTCAAGGGCTGTTGTTCTTGTGGATCCTGCTGCAAATTTGATGAAGACGAC | 25330 |
| gb:MN996531 | Organism:Severe | TGTAGTTGTCTCAAGGGCTGTTGTTCTTGTGGATCCTGCTGCAAATTTGATGAAGACGAC | 25329 |
| gb:MT066176 | Organism:Severe | TGTAGTTGTCTCAAGGGCTGTTGTTCTTGTGGATCCTGCTGCAAATTTGATGAAGACGAC | 25342 |
| gb:MT027064 | Organism:Severe | TGTAGTTGTCTCAAGGGCTGTTGTTCTTGTGGATCCTGCTGCAAATTTGATGAAGACGAC | 25342 |
| gb:MN994468 | Organism:Severe | TGTAGTTGTCTCAAGGGCTGTTGTTCTTGTGGATCCTGCTGCAAATTTGATGAAGACGAC | 25342 |
| gb:MT072688 | Organism:Severe | TGTAGTTGTCTCAAGGGCTGTTGTTCTTGTGGATCCTGCTGCAAATTTGATGAAGACGAC | 25327 |
| gb:MN996527 | Organism:Severe | TGTAGTTGTCTCAAGGGCTGTTGTTCTTGTGGATCCTGCTGCAAATTTGATGAAGACGAC | 25309 |
| gb:MT093631 | Organism:Severe | TGTAGTTGTCTCAAGGGCTGTTGTTCTTGTGGATCCTGCTGCAAATTTGATGAAGACGAC | 25380 |
| gb:MT106053 | Organism:Severe | TGTAGTTGTCTCAAGGGCTGTTGTTCTTGTGGATCCTGCTGCAAATTTGATGAAGACGAC | 25342 |
| gb:MT019533 | Organism:Severe | TGTAGTTGTCTCAAGGGCTGTTGTTCTTGTGGATCCTGCTGCAAATTTGATGAAGACGAC | 25342 |
| gb:MT019531 | Organism:Severe | TGTAGTTGTCTCAAGGGCTGTTGTTCTTGTGGATCCTGCTGCAAATTTGATGAAGACGAC | 25342 |
| gb:MN996528 | Organism:Severe | TGTAGTTGTCTCAAGGGCTGTTGTTCTTGTGGATCCTGCTGCAAATTTGATGAAGACGAC | 25342 |
| gb:MN996530 | Organism:Severe | TGTAGTTGTCTCAAGGGCTGTTGTTCTTGTGGATCCTGCTGCAAATTTGATGAAGACGAC | 25328 |
| gb:MN908947 | Organism:Severe | TGTAGTTGTCTCAAGGGCTGTTGTTCTTGTGGATCCTGCTGCAAATTTGATGAAGACGAC | 25342 |
| gb:MT019532 | Organism:Severe | TGTAGTTGTCTCAAGGGCTGTTGTTCTTGTGGATCCTGCTGCAAATTTGATGAAGACGAC | 25342 |

\*\*\*\*\*

|             |                 |                                                            |       |
|-------------|-----------------|------------------------------------------------------------|-------|
| gb:MT020781 | Organism:Severe | TCTGAGCCAGTGCTCAAAGGAGTCAAATTACATTACATAAACGAACTTATGGATTTGT | 25390 |
| gb:MT007544 | Organism:Severe | TCTGAGCCAGTGCTCAAAGGAGTCAAATTACATTACATAAACGAACTTATGGATTTGT | 25402 |
| gb:MN994467 | Organism:Severe | TCTGAGCCAGTGCTCAAAGGAGTCAAATTACATTACATAAACGAACTTATGGATTTGT | 25402 |
| gb:MT044257 | Organism:Severe | TCTGAGCCAGTGCTCAAAGGAGTCAAATTACATTACATAAACGAACTTATGGATTTGT | 25402 |
| gb:MT106054 | Organism:Severe | TCTGAGCCAGTGCTCAAAGGAGTCAAATTACATTACATAAACGAACTTATGGATTTGT | 25402 |
| gb:MT049951 | Organism:Severe | TCTGAGCCAGTGCTCAAAGGAGTCAAATTACATTACATAAACGAACTTATGGATTTGT | 25402 |
| gb:MN975262 | Organism:Severe | TCTGAGCCAGTGCTCAAAGGAGTCAAATTACATTACATAAACGAACTTATGGATTTGT | 25402 |
| gb:MT106052 | Organism:Severe | TCTGAGCCAGTGCTCAAAGGAGTCAAATTACATTACATAAACGAACTTATGGATTTGT | 25402 |
| gb:LC522975 | Organism:Severe | TCTGAGCCAGTGCTCAAAGGAGTCAAATTACATTACATAAACGAACTTATGGATTTGT | 25399 |
| gb:LC522973 | Organism:Severe | TCTGAGCCAGTGCTCAAAGGAGTCAAATTACATTACATAAACGAACTTATGGATTTGT | 25399 |
| gb:LC522974 | Organism:Severe | TCTGAGCCAGTGCTCAAAGGAGTCAAATTACATTACATAAACGAACTTATGGATTTGT | 25399 |
| gb:MN985325 | Organism:Severe | TCTGAGCCAGTGCTCAAAGGAGTCAAATTACATTACATAAACGAACTTATGGATTTGT | 25402 |
| gb:MT020881 | Organism:Severe | TCTGAGCCAGTGCTCAAAGGAGTCAAATTACATTACATAAACGAACTTATGGATTTGT | 25402 |
| gb:MT020880 | Organism:Severe | TCTGAGCCAGTGCTCAAAGGAGTCAAATTACATTACATAAACGAACTTATGGATTTGT | 25402 |
| gb:MT066175 | Organism:Severe | TCTGAGCCAGTGCTCAAAGGAGTCAAATTACATTACATAAACGAACTTATGGATTTGT | 25402 |
| gb:MN997409 | Organism:Severe | TCTGAGCCAGTGCTCAAAGGAGTCAAATTACATTACATAAACGAACTTATGGATTTGT | 25402 |
| gb:MN938384 | Organism:Severe | TCTGAGCCAGTGCTCAAAGGAGTCAAATTACATTACATAAACGAACTTATGGATTTGT | 25370 |
| gb:MT044258 | Organism:Severe | TCTGAGCCAGTGCTCAAAGGAGTCAAATTACATTACATAAACGAACTTATGGATTTGT | 25378 |
| gb:MT039890 | Organism:Severe | TCTGAGCCAGTGCTCAAAGGAGTCAAATTACATTACATAAACGAACTTATGGATTTGT | 25402 |
| gb:MN988713 | Organism:Severe | TCTGAGCCAGTGCTCAAAGGAGTCAAATTACATTACATAAACGAACTTATGGATTTGT | 25402 |
| gb:LC521925 | Organism:Severe | TCTGAGCCAGTGCTCAAAGGAGTCAAATTACATTACATAAACGAACTTATGGATTTGT | 25375 |
| gb:MT093571 | Organism:Severe | TCTGAGCCAGTGCTCAAAGGAGTCAAATTACATTACATAAACGAACTTATGGATTTGT | 25402 |
| gb:MT039887 | Organism:Severe | TCTGAGCCAGTGCTCAAAGGAGTCAAATTACATTACATAAACGAACTTATGGATTTGT | 25399 |
| gb:MT019530 | Organism:Severe | TCTGAGCCAGTGCTCAAAGGAGTCAAATTACATTACATAAACGAACTTATGGATTTGT | 25402 |
| gb:MT039888 | Organism:Severe | TCTGAGCCAGTGCTCAAAGGAGTCAAATTACATTACATAAACGAACTTATGGATTTGT | 25402 |
| gb:LC522972 | Organism:Severe | TCTGAGCCAGTGCTCAAAGGAGTCAAATTACATTACATAAACGAACTTATGGATTTGT | 25399 |
| gb:MT027063 | Organism:Severe | TCTGAGCCAGTGCTCAAAGGAGTCAAATTACATTACATAAACGAACTTATGGATTTGT | 25402 |
| gb:MT027062 | Organism:Severe | TCTGAGCCAGTGCTCAAAGGAGTCAAATTACATTACATAAACGAACTTATGGATTTGT | 25402 |
| gb:MT019529 | Organism:Severe | TCTGAGCCAGTGCTCAAAGGAGTCAAATTACATTACATAAACGAACTTATGGATTTGT | 25402 |
| gb:MN996529 | Organism:Severe | TCTGAGCCAGTGCTCAAAGGAGTCAAATTACATTACATAAACGAACTTATGGATTTGT | 25390 |
| gb:MN996531 | Organism:Severe | TCTGAGCCAGTGCTCAAAGGAGTCAAATTACATTACATAAACGAACTTATGGATTTGT | 25389 |
| gb:MT066176 | Organism:Severe | TCTGAGCCAGTGCTCAAAGGAGTCAAATTACATTACATAAACGAACTTATGGATTTGT | 25402 |
| gb:MT027064 | Organism:Severe | TCTGAGCCAGTGCTCAAAGGAGTCAAATTACATTACATAAACGAACTTATGGATTTGT | 25402 |
| gb:MN994468 | Organism:Severe | TCTGAGCCAGTGCTCAAAGGAGTCAAATTACATTACATAAACGAACTTATGGATTTGT | 25402 |
| gb:MT072688 | Organism:Severe | TCTGAGCCAGTGCTCAAAGGAGTCAAATTACATTACATAAACGAACTTATGGATTTGT | 25387 |
| gb:MN996527 | Organism:Severe | TCTGAGCCAGTGCTCAAAGGAGTCAAATTACATTACATAAACGAACTTATGGATTTGT | 25369 |
| gb:MT093631 | Organism:Severe | TCTGAGCCAGTGCTCAAAGGAGTCAAATTACATTACATAAACGAACTTATGGATTTGT | 25440 |
| gb:MT106053 | Organism:Severe | TCTGAGCCAGTGCTCAAAGGAGTCAAATTACATTACATAAACGAACTTATGGATTTGT | 25402 |

|             |                 |                                                             |       |
|-------------|-----------------|-------------------------------------------------------------|-------|
| gb:MT019533 | Organism:Severe | TCTGAGCCAGTGCTCAAAGGAGTCAAATTACATTACACATAAACGAACTTATGGATTGT | 25402 |
| gb:MT019531 | Organism:Severe | TCTGAGCCAGTGCTCAAAGGAGTCAAATTACATTACACATAAACGAACTTATGGATTGT | 25402 |
| gb:MN996528 | Organism:Severe | TCTGAGCCAGTGCTCAAAGGAGTCAAATTACATTACACATAAACGAACTTATGGATTGT | 25402 |
| gb:MN996530 | Organism:Severe | TCTGAGCCAGTGCTCAAAGGAGTCAAATTACATTACACATAAACGAACTTATGGATTGT | 25388 |
| gb:MN908947 | Organism:Severe | TCTGAGCCAGTGCTCAAAGGAGTCAAATTACATTACACATAAACGAACTTATGGATTGT | 25402 |
| gb:MT019532 | Organism:Severe | TCTGAGCCAGTGCTCAAAGGAGTCAAATTACATTACACATAAACGAACTTATGGATTGT | 25402 |

\*\*\*\*\*

|             |                 |                                                             |       |
|-------------|-----------------|-------------------------------------------------------------|-------|
| gb:MT020781 | Organism:Severe | TTATGAGAATCTTCACAATTGGAACGTAACTTTGAAGCAAGGTGAAATCAAGGATGCTA | 25450 |
| gb:MT007544 | Organism:Severe | TTATGAGAATCTTCACAATTGGAACGTAACTTTGAAGCAAGGTGAAATCAAGGATGCTA | 25462 |
| gb:MN994467 | Organism:Severe | TTATGAGAATCTTCACAATTGGAACGTAACTTTGAAGCAAGGTGAAATCAAGGATGCTA | 25462 |
| gb:MT044257 | Organism:Severe | TTATGAGAATCTTCACAATTGGAACGTAACTTTGAAGCAAGGTGAAATCAAGGATGCTA | 25462 |
| gb:MT106054 | Organism:Severe | TTATGAGAATCTTCACAATTGGAACGTAACTTTGAAGCAAGGTGAAATCAAGGATGCTA | 25462 |
| gb:MT049951 | Organism:Severe | TTATGAGAATCTTCACAATTGGAACGTAACTTTGAAGCAAGGTGAAATCAAGGATGCTA | 25462 |
| gb:MN975262 | Organism:Severe | TTATGAGAATCTTCACAATTGGAACGTAACTTTGAAGCAAGGTGAAATCAAGGATGCTA | 25462 |
| gb:MT106052 | Organism:Severe | TTATGAGAATCTTCACAATTGGAACGTAACTTTGAAGCAAGGTGAAATCAAGGATGCTA | 25462 |
| gb:LC522975 | Organism:Severe | TTATGAGAATCTTCACAATTGGAACGTAACTTTGAAGCAAGGTGAAATCAAGGATGCTA | 25459 |
| gb:LC522973 | Organism:Severe | TTATGAGAATCTTCACAATTGGAACGTAACTTTGAAGCAAGGTGAAATCAAGGATGCTA | 25459 |
| gb:LC522974 | Organism:Severe | TTATGAGAATCTTCACAATTGGAACGTAACTTTGAAGCAAGGTGAAATCAAGGATGCTA | 25459 |
| gb:MN985325 | Organism:Severe | TTATGAGAATCTTCACAATTGGAACGTAACTTTGAAGCAAGGTGAAATCAAGGATGCTA | 25462 |
| gb:MT020881 | Organism:Severe | TTATGAGAATCTTCACAATTGGAACGTAACTTTGAAGCAAGGTGAAATCAAGGATGCTA | 25462 |
| gb:MT020880 | Organism:Severe | TTATGAGAATCTTCACAATTGGAACGTAACTTTGAAGCAAGGTGAAATCAAGGATGCTA | 25462 |
| gb:MT066175 | Organism:Severe | TTATGAGAATCTTCACAATTGGAACGTAACTTTGAAGCAAGGTGAAATCAAGGATGCTA | 25462 |
| gb:MN997409 | Organism:Severe | TTATGAGAATCTTCACAATTGGAACGTAACTTTGAAGCAAGGTGAAATCAAGGATGCTA | 25462 |
| gb:MN938384 | Organism:Severe | TTATGAGAATCTTCACAATTGGAACGTAACTTTGAAGCAAGGTGAAATCAAGGATGCTA | 25430 |
| gb:MT044258 | Organism:Severe | TTATGAGAATCTTCACAATTGGAACGTAACTTTGAAGCAAGGTGAAATCAAGGATGCTA | 25438 |
| gb:MT039890 | Organism:Severe | TTATGAGAATCTTCACAATTGGAACGTAACTTTGAAGCAAGGTGAAATCAAGGATGCTA | 25462 |
| gb:MN988713 | Organism:Severe | TTATGAGAATCTTCACAATTGGAACGTAACTTTGAAGCAAGGTGAAATCAAGGATGCTA | 25462 |
| gb:LC521925 | Organism:Severe | TTATGAGAATCTTCACAATTGGAACGTAACTTTGAAGCAAGGTGAAATCAAGGATGCTA | 25435 |
| gb:MT093571 | Organism:Severe | TTATGAGAATCTTCACAATTGGAACGTAACTTTGAAGCAAGGTGAAATCAAGGATGCTA | 25462 |
| gb:MT039887 | Organism:Severe | TTATGAGAATCTTCACAATTGGAACGTAACTTTGAAGCAAGGTGAAATCAAGGATGCTA | 25459 |
| gb:MT019530 | Organism:Severe | TTATGAGAATCTTCACAATTGGAACGTAACTTTGAAGCAAGGTGAAATCAAGGATGCTA | 25462 |
| gb:MT039888 | Organism:Severe | TTATGAGAATCTTCACAATTGGAACGTAACTTTGAAGCAAGGTGAAATCAAGGATGCTA | 25462 |
| gb:LC522972 | Organism:Severe | TTATGAGAATCTTCACAATTGGAACGTAACTTTGAAGCAAGGTGAAATCAAGGATGCTA | 25459 |
| gb:MT027063 | Organism:Severe | TTATGAGAATCTTCACAATTGGAACGTAACTTTGAAGCAAGGTGAAATCAAGGATGCTA | 25462 |
| gb:MT027062 | Organism:Severe | TTATGAGAATCTTCACAATTGGAACGTAACTTTGAAGCAAGGTGAAATCAAGGATGCTA | 25462 |
| gb:MT019529 | Organism:Severe | TTATGAGAATCTTCACAATTGGAACGTAACTTTGAAGCAAGGTGAAATCAAGGATGCTA | 25462 |
| gb:MN996529 | Organism:Severe | TTATGAGAATCTTCACAATTGGAACGTAACTTTGAAGCAAGGTGAAATCAAGGATGCTA | 25450 |
| gb:MN996531 | Organism:Severe | TTATGAGAATCTTCACAATTGGAACGTAACTTTGAAGCAAGGTGAAATCAAGGATGCTA | 25449 |
| gb:MT066176 | Organism:Severe | TTATGAGAATCTTCACAATTGGAACGTAACTTTGAAGCAAGGTGAAATCAAGGATGCTA | 25462 |
| gb:MT027064 | Organism:Severe | TTATGAGAATCTTCACAATTGGAACGTAACTTTGAAGCAAGGTGAAATCAAGGATGCTA | 25462 |
| gb:MN994468 | Organism:Severe | TTATGAGAATCTTCACAATTGGAACGTAACTTTGAAGCAAGGTGAAATCAAGGATGCTA | 25462 |
| gb:MT072688 | Organism:Severe | TTATGAGAATCTTCACAATTGGAACGTAACTTTGAAGCAAGGTGAAATCAAGGATGCTA | 25447 |
| gb:MN996527 | Organism:Severe | TTATGAGAATCTTCACAATTGGAACGTAACTTTGAAGCAAGGTGAAATCAAGGATGCTA | 25429 |
| gb:MT093631 | Organism:Severe | TTATGAGAATCTTCACAATTGGAACGTAACTTTGAAGCAAGGTGAAATCAAGGATGCTA | 25500 |
| gb:MT106053 | Organism:Severe | TTATGAGAATCTTCACAATTGGAACGTAACTTTGAAGCAAGGTGAAATCAAGGATGCTA | 25462 |
| gb:MT019533 | Organism:Severe | TTATGAGAATCTTCACAATTGGAACGTAACTTTGAAGCAAGGTGAAATCAAGGATGCTA | 25462 |
| gb:MT019531 | Organism:Severe | TTATGAGAATCTTCACAATTGGAACGTAACTTTGAAGCAAGGTGAAATCAAGGATGCTA | 25462 |
| gb:MN996528 | Organism:Severe | TTATGAGAATCTTCACAATTGGAACGTAACTTTGAAGCAAGGTGAAATCAAGGATGCTA | 25462 |
| gb:MN996530 | Organism:Severe | TTATGAGAATCTTCACAATTGGAACGTAACTTTGAAGCAAGGTGAAATCAAGGATGCTA | 25448 |
| gb:MN908947 | Organism:Severe | TTATGAGAATCTTCACAATTGGAACGTAACTTTGAAGCAAGGTGAAATCAAGGATGCTA | 25462 |
| gb:MT019532 | Organism:Severe | TTATGAGAATCTTCACAATTGGAACGTAACTTTGAAGCAAGGTGAAATCAAGGATGCTA | 25462 |

\*\*\*\*\*

|             |                 |                                                               |       |
|-------------|-----------------|---------------------------------------------------------------|-------|
| gb:MT020781 | Organism:Severe | CTCCTTCAGATTTTGTTCGCGCTACTGCAACGATACCGATACAAGCCTCACTCCCTTTTCG | 25510 |
| gb:MT007544 | Organism:Severe | CTCCTTCAGATTTTGTTCGCGCTACTGCAACGATACCGATACAAGCCTCACTCCCTTTTCG | 25522 |
| gb:MN994467 | Organism:Severe | CTCCTTCAGATTTTGTTCGCGCTACTGCAACGATACCGATACAAGCCTCACTCCCTTTTCG | 25522 |
| gb:MT044257 | Organism:Severe | CTCCTTCAGATTTTGTTCGCGCTACTGCAACGATACCGATACAAGCCTCACTCCCTTTTCG | 25522 |
| gb:MT106054 | Organism:Severe | CTCCTTCAGATTTTGTTCGCGCTACTGCAACGATACCGATACAAGCCTCACTCCCTTTTCG | 25522 |
| gb:MT049951 | Organism:Severe | CTCCTTCAGATTTTGTTCGCGCTACTGCAACGATACCGATACAAGCCTCACTCCCTTTTCG | 25522 |
| gb:MN975262 | Organism:Severe | CTCCTTCAGATTTTGTTCGCGCTACTGCAACGATACCGATACAAGCCTCACTCCCTTTTCG | 25522 |
| gb:MT106052 | Organism:Severe | CTCCTTCAGATTTTGTTCGCGCTACTGCAACGATACCGATACAAGCCTCACTCCCTTTTCG | 25522 |
| gb:LC522975 | Organism:Severe | CTCCTTCAGATTTTGTTCGCGCTACTGCAACGATACCGATACAAGCCTCACTCCCTTTTCG | 25519 |
| gb:LC522973 | Organism:Severe | CTCCTTCAGATTTTGTTCGCGCTACTGCAACGATACCGATACAAGCCTCACTCCCTTTTCG | 25519 |
| gb:LC522974 | Organism:Severe | CTCCTTCAGATTTTGTTCGCGCTACTGCAACGATACCGATACAAGCCTCACTCCCTTTTCG | 25519 |



|             |                 |                                                              |       |
|-------------|-----------------|--------------------------------------------------------------|-------|
| gb:MN996531 | Organism:Severe | GATGGCTTATTGTTGGCGTTGCACCTCTTGCTGTTTTTCAGAGCGCTTCCAAAATCATAA | 25569 |
| gb:MT066176 | Organism:Severe | GATGGCTTATTGTTGGCGTTGCACCTCTTGCTGTTTTTCAGAGCGCTTCCAAAATCATAA | 25582 |
| gb:MT027064 | Organism:Severe | GATGGCTTATTGTTGGCGTTGCACCTCTTGCTGTTTTTCAGAGCGCTTCCAAAATCATAA | 25582 |
| gb:MN994468 | Organism:Severe | GATGGCTTATTGTTGGCGTTGCACCTCTTGCTGTTTTTCAGAGCGCTTCCAAAATCATAA | 25582 |
| gb:MT072688 | Organism:Severe | GATGGCTTATTGTTGGCGTTGCACCTCTTGCTGTTTTTCAGAGCGCTTCCAAAATCATAA | 25567 |
| gb:MN996527 | Organism:Severe | GATGGCTTATTGTTGGCGTTGCACCTCTTGCTGTTTTTCAGAGCGCTTCCAAAATCATAA | 25549 |
| gb:MT093631 | Organism:Severe | GATGGCTTATTGTTGGCGTTGCACCTCTTGCTGTTTTTCAGAGCGCTTCCAAAATCATAA | 25620 |
| gb:MT106053 | Organism:Severe | GATGGCTTATTGTTGGCGTTGCACCTCTTGCTGTTTTTCAGAGCGCTTCCAAAATCATAA | 25582 |
| gb:MT019533 | Organism:Severe | GATGGCTTATTGTTGGCGTTGCACCTCTTGCTGTTTTTCAGAGCGCTTCCAAAATCATAA | 25582 |
| gb:MT019531 | Organism:Severe | GATGGCTTATTGTTGGCGTTGCACCTCTTGCTGTTTTTCAGAGCGCTTCCAAAATCATAA | 25582 |
| gb:MN996528 | Organism:Severe | GATGGCTTATTGTTGGCGTTGCACCTCTTGCTGTTTTTCAGAGCGCTTCCAAAATCATAA | 25582 |
| gb:MN996530 | Organism:Severe | GATGGCTTATTGTTGGCGTTGCACCTCTTGCTGTTTTTCAGAGCGCTTCCAAAATCATAA | 25568 |
| gb:MN908947 | Organism:Severe | GATGGCTTATTGTTGGCGTTGCACCTCTTGCTGTTTTTCAGAGCGCTTCCAAAATCATAA | 25582 |
| gb:MT019532 | Organism:Severe | GATGGCTTATTGTTGGCGTTGCACCTCTTGCTGTTTTTCAGAGCGCTTCCAAAATCATAA | 25582 |

\*\*\*\*\*

|             |                 |                                                              |       |
|-------------|-----------------|--------------------------------------------------------------|-------|
| gb:MT020781 | Organism:Severe | CCCTCAAAAAGAGATGGCAACTAGCACTCTCCAAGGGTGTTCACTTTGTTTGCACCTTGC | 25630 |
| gb:MT007544 | Organism:Severe | CCCTCAAAAAGAGATGGCAACTAGCACTCTCCAAGGGTGTTCACTTTGTTTGCACCTTGC | 25642 |
| gb:MN994467 | Organism:Severe | CCCTCAAAAAGAGATGGCAACTAGCACTCTCCAAGGGTGTTCACTTTGTTTGCACCTTGC | 25642 |
| gb:MT044257 | Organism:Severe | CCCTCAAAAAGAGATGGCAACTAGCACTCTCCAAGGGTGTTCACTTTGTTTGCACCTTGC | 25642 |
| gb:MT106054 | Organism:Severe | CCCTCAAAAAGAGATGGCAACTAGCACTCTCCAAGGGTGTTCACTTTGTTTGCACCTTGC | 25642 |
| gb:MT049951 | Organism:Severe | CCCTCAAAAAGAGATGGCAACTAGCACTCTCCAAGGGTGTTCACTTTGTTTGCACCTTGC | 25642 |
| gb:MN975262 | Organism:Severe | CCCTCAAAAAGAGATGGCAACTAGCACTCTCCAAGGGTGTTCACTTTGTTTGCACCTTGC | 25642 |
| gb:MT106052 | Organism:Severe | CCCTCAAAAAGAGATGGCAACTAGCACTCTCCAAGGGTGTTCACTTTGTTTGCACCTTGC | 25642 |
| gb:LC522975 | Organism:Severe | CCCTCAAAAAGAGATGGCAACTAGCACTCTCCAAGGGTGTTCACTTTGTTTGCACCTTGC | 25639 |
| gb:LC522973 | Organism:Severe | CCCTCAAAAAGAGATGGCAACTAGCACTCTCCAAGGGTGTTCACTTTGTTTGCACCTTGC | 25639 |
| gb:LC522974 | Organism:Severe | CCCTCAAAAAGAGATGGCAACTAGCACTCTCCAAGGGTGTTCACTTTGTTTGCACCTTGC | 25639 |
| gb:MN985325 | Organism:Severe | CCCTCAAAAAGAGATGGCAACTAGCACTCTCCAAGGGTGTTCACTTTGTTTGCACCTTGC | 25642 |
| gb:MT020881 | Organism:Severe | CCCTCAAAAAGAGATGGCAACTAGCACTCTCCAAGGGTGTTCACTTTGTTTGCACCTTGC | 25642 |
| gb:MT020880 | Organism:Severe | CCCTCAAAAAGAGATGGCAACTAGCACTCTCCAAGGGTGTTCACTTTGTTTGCACCTTGC | 25642 |
| gb:MT066175 | Organism:Severe | CCCTCAAAAAGAGATGGCAACTAGCACTCTCCAAGGGTGTTCACTTTGTTTGCACCTTGC | 25642 |
| gb:MN997409 | Organism:Severe | CCCTCAAAAAGAGATGGCAACTAGCACTCTCCAAGGGTGTTCACTTTGTTTGCACCTTGC | 25642 |
| gb:MN938384 | Organism:Severe | CCCTCAAAAAGAGATGGCAACTAGCACTCTCCAAGGGTGTTCACTTTGTTTGCACCTTGC | 25610 |
| gb:MT044258 | Organism:Severe | CCCTCAAAAAGAGATGGCAACTAGCACTCTCCAAGGGTGTTCACTTTGTTTGCACCTTGC | 25618 |
| gb:MT039890 | Organism:Severe | CCCTCAAAAAGAGATGGCAACTAGCACTCTCCAAGGGTGTTCACTTTGTTTGCACCTTGC | 25642 |
| gb:MN988713 | Organism:Severe | CCCTCAAAAAGAGATGGCAACTAGCACTCTCCAAGGGTGTTCACTTTGTTTGCACCTTGC | 25642 |
| gb:LC521925 | Organism:Severe | CCCTCAAAAAGAGATGGCAACTAGCACTCTCCAAGGGTGTTCACTTTGTTTGCACCTTGC | 25615 |
| gb:MT093571 | Organism:Severe | CCCTCAAAAAGAGATGGCAACTAGCACTCTCCAAGGGTGTTCACTTTGTTTGCACCTTGC | 25642 |
| gb:MT039887 | Organism:Severe | CCCTCAAAAAGAGATGGCAACTAGCACTCTCCAAGGGTGTTCACTTTGTTTGCACCTTGC | 25639 |
| gb:MT019530 | Organism:Severe | CCCTCAAAAAGAGATGGCAACTAGCACTCTCCAAGGGTGTTCACTTTGTTTGCACCTTGC | 25642 |
| gb:MT039888 | Organism:Severe | CCCTCAAAAAGAGATGGCAACTAGCACTCTCCAAGGGTGTTCACTTTGTTTGCACCTTGC | 25642 |
| gb:LC522972 | Organism:Severe | CCCTCAAAAAGAGATGGCAACTAGCACTCTCCAAGGGTGTTCACTTTGTTTGCACCTTGC | 25639 |
| gb:MT027063 | Organism:Severe | CCCTCAAAAAGAGATGGCAACTAGCACTCTCCAAGGGTGTTCACTTTGTTTGCACCTTGC | 25642 |
| gb:MT027062 | Organism:Severe | CCCTCAAAAAGAGATGGCAACTAGCACTCTCCAAGGGTGTTCACTTTGTTTGCACCTTGC | 25642 |
| gb:MT019529 | Organism:Severe | CCCTCAAAAAGAGATGGCAACTAGCACTCTCCAAGGGTGTTCACTTTGTTTGCACCTTGC | 25642 |
| gb:MN996529 | Organism:Severe | CCCTCAAAAAGAGATGGCAACTAGCACTCTCCAAGGGTGTTCACTTTGTTTGCACCTTGC | 25630 |
| gb:MN996531 | Organism:Severe | CCCTCAAAAAGAGATGGCAACTAGCACTCTCCAAGGGTGTTCACTTTGTTTGCACCTTGC | 25629 |
| gb:MT066176 | Organism:Severe | CCCTCAAAAAGAGATGGCAACTAGCACTCTCCAAGGGTGTTCACTTTGTTTGCACCTTGC | 25642 |
| gb:MT027064 | Organism:Severe | CCCTCAAAAAGAGATGGCAACTAGCACTCTCCAAGGGTGTTCACTTTGTTTGCACCTTGC | 25642 |
| gb:MN994468 | Organism:Severe | CCCTCAAAAAGAGATGGCAACTAGCACTCTCCAAGGGTGTTCACTTTGTTTGCACCTTGC | 25642 |
| gb:MT072688 | Organism:Severe | CCCTCAAAAAGAGATGGCAACTAGCACTCTCCAAGGGTGTTCACTTTGTTTGCACCTTGC | 25627 |
| gb:MN996527 | Organism:Severe | CCCTCAAAAAGAGATGGCAACTAGCACTCTCCAAGGGTGTTCACTTTGTTTGCACCTTGC | 25609 |
| gb:MT093631 | Organism:Severe | CCCTCAAAAAGAGATGGCAACTAGCACTCTCCAAGGGTGTTCACTTTGTTTGCACCTTGC | 25680 |
| gb:MT106053 | Organism:Severe | CCCTCAAAAAGAGATGGCAACTAGCACTCTCCAAGGGTGTTCACTTTGTTTGCACCTTGC | 25642 |
| gb:MT019533 | Organism:Severe | CCCTCAAAAAGAGATGGCAACTAGCACTCTCCAAGGGTGTTCACTTTGTTTGCACCTTGC | 25642 |
| gb:MT019531 | Organism:Severe | CCCTCAAAAAGAGATGGCAACTAGCACTCTCCAAGGGTGTTCACTTTGTTTGCACCTTGC | 25642 |
| gb:MN996528 | Organism:Severe | CCCTCAAAAAGAGATGGCAACTAGCACTCTCCAAGGGTGTTCACTTTGTTTGCACCTTGC | 25642 |
| gb:MN996530 | Organism:Severe | CCCTCAAAAAGAGATGGCAACTAGCACTCTCCAAGGGTGTTCACTTTGTTTGCACCTTGC | 25628 |
| gb:MN908947 | Organism:Severe | CCCTCAAAAAGAGATGGCAACTAGCACTCTCCAAGGGTGTTCACTTTGTTTGCACCTTGC | 25642 |
| gb:MT019532 | Organism:Severe | CCCTCAAAAAGAGATGGCAACTAGCACTCTCCAAGGGTGTTCACTTTGTTTGCACCTTGC | 25642 |

\*\*\*\*\*

|             |                 |                                                               |       |
|-------------|-----------------|---------------------------------------------------------------|-------|
| gb:MT020781 | Organism:Severe | TGTTGTTGTTTGTAAACAGTTTACTCACACCTTTTGCTCGTTGCTGCTGGCCTTGAAGCCC | 25690 |
| gb:MT007544 | Organism:Severe | TGTTGTTGTTTGTAAACAGTTTACTCACACCTTTTGCTCGTTGCTGCTGGCCTTGAAGCCC | 25702 |
| gb:MN994467 | Organism:Severe | TGTTGTTGTTTGTAAACAGTTTACTCACACCTTTTGCTCGTTGCTGCTGGCCTTGAAGCCC | 25702 |





|             |                 |                                                              |       |
|-------------|-----------------|--------------------------------------------------------------|-------|
| gb:MT039887 | Organism:Severe | CTTTTCTCTATCTTTATGCTTTAGTCTACTTCTTGCAGAGTATAAACTTTGTAAGAATAA | 25759 |
| gb:MT019530 | Organism:Severe | CTTTTCTCTATCTTTATGCTTTAGTCTACTTCTTGCAGAGTATAAACTTTGTAAGAATAA | 25762 |
| gb:MT039888 | Organism:Severe | CTTTTCTCTATCTTTATGCTTTAGTCTACTTCTTGCAGAGTATAAACTTTGTAAGAATAA | 25762 |
| gb:LC522972 | Organism:Severe | CTTTTCTCTATCTTTATGCTTTAGTCTACTTCTTGCAGAGTATAAACTTTGTAAGAATAA | 25759 |
| gb:MT027063 | Organism:Severe | CTTTTCTCTATCTTTATGCTTTAGTCTACTTCTTGCAGAGTATAAACTTTGTAAGAATAA | 25762 |
| gb:MT027062 | Organism:Severe | CTTTTCTCTATCTTTATGCTTTAGTCTACTTCTTGCAGAGTATAAACTTTGTAAGAATAA | 25762 |
| gb:MT019529 | Organism:Severe | CTTTTCTCTATCTTTATGCTTTAGTCTACTTCTTGCAGAGTATAAACTTTGTAAGAATAA | 25762 |
| gb:MN996529 | Organism:Severe | CTTTTCTCTATCTTTATGCTTTAGTCTACTTCTTGCAGAGTATAAACTTTGTAAGAATAA | 25750 |
| gb:MN996531 | Organism:Severe | CTTTTCTCTATCTTTATGCTTTAGTCTACTTCTTGCAGAGTATAAACTTTGTAAGAATAA | 25749 |
| gb:MT066176 | Organism:Severe | CTTTTCTCTATCTTTATGCTTTAGTCTACTTCTTGCAGAGTATAAACTTTGTAAGAATAA | 25762 |
| gb:MT027064 | Organism:Severe | CTTTTCTCTATCTTTATGCTTTAGTCTACTTCTTGCAGAGTATAAACTTTGTAAGAATAA | 25762 |
| gb:MN994468 | Organism:Severe | CTTTTCTCTATCTTTATGCTTTAGTCTACTTCTTGCAGAGTATAAACTTTGTAAGAATAA | 25762 |
| gb:MT072688 | Organism:Severe | CTTTTCTCTATCTTTATGCTTTAGTCTACTTCTTGCAGAGTATAAACTTTGTAAGAATAA | 25747 |
| gb:MN996527 | Organism:Severe | CTTTTCTCTATCTTTATGCTTTAGTCTACTTCTTGCAGAGTATAAACTTTGTAAGAATAA | 25729 |
| gb:MT093631 | Organism:Severe | CTTTTCTCTATCTTTATGCTTTAGTCTACTTCTTGCAGAGTATAAACTTTGTAAGAATAA | 25800 |
| gb:MT106053 | Organism:Severe | CTTTTCTCTATCTTTATGCTTTAGTCTACTTCTTGCAGAGTATAAACTTTGTAAGAATAA | 25762 |
| gb:MT019533 | Organism:Severe | CTTTTCTCTATCTTTATGCTTTAGTCTACTTCTTGCAGAGTATAAACTTTGTAAGAATAA | 25762 |
| gb:MT019531 | Organism:Severe | CTTTTCTCTATCTTTATGCTTTAGTCTACTTCTTGCAGAGTATAAACTTTGTAAGAATAA | 25762 |
| gb:MN996528 | Organism:Severe | CTTTTCTCTATCTTTATGCTTTAGTCTACTTCTTGCAGAGTATAAACTTTGTAAGAATAA | 25762 |
| gb:MN996530 | Organism:Severe | CTTTTCTCTATCTTTATGCTTTAGTCTACTTCTTGCAGAGTATAAACTTTGTAAGAATAA | 25748 |
| gb:MN908947 | Organism:Severe | CTTTTCTCTATCTTTATGCTTTAGTCTACTTCTTGCAGAGTATAAACTTTGTAAGAATAA | 25762 |
| gb:MT019532 | Organism:Severe | CTTTTCTCTATCTTTATGCTTTAGTCTACTTCTTGCAGAGTATAAACTTTGTAAGAATAA | 25762 |

\*\*\*\*\*

|             |                 |                                                             |       |
|-------------|-----------------|-------------------------------------------------------------|-------|
| gb:MT020781 | Organism:Severe | TAATGAGGCTTTGGCTTTGCTGGAAATGCCGTTCCAAAACCCANNNNNNNNNNNNNNNN | 25810 |
| gb:MT007544 | Organism:Severe | TAATGAGGCTTTGGCTTTGCTGGAAATGCCGTTCCAAAACCCATTACTTTATGATGCCA | 25822 |
| gb:MN994467 | Organism:Severe | TAATGAGGCTTTGGCTTTGCTGGAAATGCCGTTCCAAAACCCATTACTTTATGATGCCA | 25822 |
| gb:MT044257 | Organism:Severe | TAATGAGGCTTTGGCTTTGCTGGAAATGCCGTTCCAAAACCCATTACTTTATGATGCCA | 25822 |
| gb:MT106054 | Organism:Severe | TAATGAGGCTTTGGCTTTGCTGGAAATGCCGTTCCAAAACCCATTACTTTATGATGCCA | 25822 |
| gb:MT049951 | Organism:Severe | TAATGAGGCTTTGGCTTTGCTGGAAATGCCGTTCCAAAACCCATTACTTTATGATGCCA | 25822 |
| gb:MN975262 | Organism:Severe | TAATGAGGCTTTGGCTTTGCTGGAAATGCCGTTCCAAAACCCATTACTTTATGATGCCA | 25822 |
| gb:MT106052 | Organism:Severe | TAATGAGGCTTTGGCTTTGCTGGAAATGCCGTTCCAAAACCCATTACTTTATGATGCCA | 25822 |
| gb:LC522975 | Organism:Severe | TAATGAGGCTTTGGCTTTGCTGGAAATGCCGTTCCAAAACCCATTACTTTATGATGCCA | 25819 |
| gb:LC522973 | Organism:Severe | TAATGAGGCTTTGGCTTTGCTGGAAATGCCGTTCCAAAACCCATTACTTTATGATGCCA | 25819 |
| gb:LC522974 | Organism:Severe | TAATGAGGCTTTGGCTTTGCTGGAAATGCCGTTCCAAAACCCATTACTTTATGATGCCA | 25819 |
| gb:MN985325 | Organism:Severe | TAATGAGGCTTTGGCTTTGCTGGAAATGCCGTTCCAAAACCCATTACTTTATGATGCCA | 25822 |
| gb:MT020881 | Organism:Severe | TAATGAGGCTTTGGCTTTGCTGGAAATGCCGTTCCAAAACCCATTACTTTATGATGCCA | 25822 |
| gb:MT020880 | Organism:Severe | TAATGAGGCTTTGGCTTTGCTGGAAATGCCGTTCCAAAACCCATTACTTTATGATGCCA | 25822 |
| gb:MT066175 | Organism:Severe | TAATGAGGCTTTGGCTTTGCTGGAAATGCCGTTCCAAAACCCATTACTTTATGATGCCA | 25822 |
| gb:MN997409 | Organism:Severe | TAATGAGGCTTTGGCTTTGCTGGAAATGCCGTTCCAAAACCCATTACTTTATGATGCCA | 25822 |
| gb:MN938384 | Organism:Severe | TAATGAGGCTTTGGCTTTGCTGGAAATGCCGTTCCAAAACCCATTACTTTATGATGCCA | 25790 |
| gb:MT044258 | Organism:Severe | TAATGAGGCTTTGGCTTTGCTGGAAATGCCGTTCCAAAACCCATTACTTTATGATGCCA | 25798 |
| gb:MT039890 | Organism:Severe | TAATGAGGCTTTGGCTTTGCTGGAAATGCCGTTCCAAAACCCATTACTTTATGATGCCA | 25822 |
| gb:MN988713 | Organism:Severe | TAATGAGGCTTTGGCTTTGCTGGAAATGCCGTTCCAAAACCCATTACTTTATGATGCCA | 25822 |
| gb:LC521925 | Organism:Severe | TAATGAGGCTTTGGCTTTGCTGGAAATGCCGTTCCAAAACCCATTACTTTATGATGCCA | 25795 |
| gb:MT093571 | Organism:Severe | TAATGAGGCTTTGGCTTTGCTGGAAATGCCGTTCCAAAACCCATTACTTTATGATGCCA | 25822 |
| gb:MT039887 | Organism:Severe | TAATGAGGCTTTGGCTTTGCTGGAAATGCCGTTCCAAAACCCATTACTTTATGATGCCA | 25819 |
| gb:MT019530 | Organism:Severe | TAATGAGGCTTTGGCTTTGCTGGAAATGCCGTTCCAAAACCCATTACTTTATGATGCCA | 25822 |
| gb:MT039888 | Organism:Severe | TAATGAGGCTTTGGCTTTGCTGGAAATGCCGTTCCAAAACCCATTACTTTATGATGCCA | 25822 |
| gb:LC522972 | Organism:Severe | TAATGAGGCTTTGGCTTTGCTGGAAATGCCGTTCCAAAACCCATTACTTTATGATGCCA | 25819 |
| gb:MT027063 | Organism:Severe | TAATGAGGCTTTGGCTTTGCTGGAAATGCCGTTCCAAAACCCATTACTTTATGATGCCA | 25822 |
| gb:MT027062 | Organism:Severe | TAATGAGGCTTTGGCTTTGCTGGAAATGCCGTTCCAAAACCCATTACTTTATGATGCCA | 25822 |
| gb:MT019529 | Organism:Severe | TAATGAGGCTTTGGCTTTGCTGGAAATGCCGTTCCAAAACCCATTACTTTATGATGCCA | 25822 |
| gb:MN996529 | Organism:Severe | TAATGAGGCTTTGGCTTTGCTGGAAATGCCGTTCCAAAACCCATTACTTTATGATGCCA | 25810 |
| gb:MN996531 | Organism:Severe | TAATGAGGCTTTGGCTTTGCTGGAAATGCCGTTCCAAAACCCATTACTTTATGATGCCA | 25809 |
| gb:MT066176 | Organism:Severe | TAATGAGGCTTTGGCTTTGCTGGAAATGCCGTTCCAAAACCCATTACTTTATGATGCCA | 25822 |
| gb:MT027064 | Organism:Severe | TAATGAGGCTTTGGCTTTGCTGGAAATGCCGTTCCAAAACCCATTACTTTATGATGCCA | 25822 |
| gb:MN994468 | Organism:Severe | TAATGAGGCTTTGGCTTTGCTGGAAATGCCGTTCCAAAACCCATTACTTTATGATGCCA | 25822 |
| gb:MT072688 | Organism:Severe | TAATGAGGCTTTGGCTTTGCTGGAAATGCCGTTCCAAAACCCATTACTTTATGATGCCA | 25807 |
| gb:MN996527 | Organism:Severe | TAATGAGGCTTTGGCTTTGCTGGAAATGCCGTTCCAAAACCCATTACTTTATGATGCCA | 25789 |
| gb:MT093631 | Organism:Severe | TAATGAGGCTTTGGCTTTGCTGGAAATGCCGTTCCAAAACCCATTACTTTATGATGCCA | 25860 |
| gb:MT106053 | Organism:Severe | TAATGAGGCTTTGGCTTTGCTGGAAATGCCGTTCCAAAACCCATTACTTTATGATGCCA | 25822 |
| gb:MT019533 | Organism:Severe | TAATGAGGCTTTGGCTTTGCTGGAAATGCCGTTCCAAAACCCATTACTTTATGATGCCA | 25822 |
| gb:MT019531 | Organism:Severe | TAATGAGGCTTTGGCTTTGCTGGAAATGCCGTTCCAAAACCCATTACTTTATGATGCCA | 25822 |
| gb:MN996528 | Organism:Severe | TAATGAGGCTTTGGCTTTGCTGGAAATGCCGTTCCAAAACCCATTACTTTATGATGCCA | 25822 |



|             |                 |                                                             |       |
|-------------|-----------------|-------------------------------------------------------------|-------|
| gb:MT066175 | Organism:Severe | CTTCTTCAATTGTCATTACTTCAGGTGATGGCACAACAAGTCCATTTCTGAACATGACT | 25942 |
| gb:MN997409 | Organism:Severe | CTTCTTCAATTGTCATTACTTCAGGTGATGGCACAACAAGTCCATTTCTGAACATGACT | 25942 |
| gb:MN938384 | Organism:Severe | CTTCTTCAATTGTCATTACTTCAGGTGATGGCACAACAAGTCCATTTCTGAACATGACT | 25910 |
| gb:MT044258 | Organism:Severe | CTTCTTCAATTGTCATTACTTCAGGTGATGGCACAACAAGTCCATTTCTGAACATGACT | 25918 |
| gb:MT039890 | Organism:Severe | CTTCTTCAATTGTCATTACTTCAGGTGATGGCACAACAAGTCCATTTCTGAACATGACT | 25942 |
| gb:MN988713 | Organism:Severe | CTTCTTCAATTGTCATTACTTCAGGTGATGGCACAACAAGTCCATTTCTGAACATGACT | 25942 |
| gb:LC521925 | Organism:Severe | CTTCTTCAATTGTCATTACTTCAGGTGATGGCACAACAAGTCCATTTCTGAACATGACT | 25915 |
| gb:MT093571 | Organism:Severe | CTTCTTCAATTGTCATTACTTCAGGTGATGGCACAACAAGTCCATTTCTGAACATGACT | 25942 |
| gb:MT039887 | Organism:Severe | CTTCTTCAATTGTCATTACTTCAGGTGATGGCACAACAAGTCCATTTCTGAACATGACT | 25939 |
| gb:MT019530 | Organism:Severe | CTTCTTCAATTGTCATTACTTCAGGTGATGGCACAACAAGTCCATTTCTGAACATGACT | 25942 |
| gb:MT039888 | Organism:Severe | CTTCTTCAATTGTCATTACTTCAGGTGATGGCACAACAAGTCCATTTCTGAACATGACT | 25942 |
| gb:LC522972 | Organism:Severe | CTTCTTCAATTGTCATTACTTCAGGTGATGGCACAACAAGTCCATTTCTGAACATGACT | 25939 |
| gb:MT027063 | Organism:Severe | CTTCTTCAATTGTCATTACTTCAGGTGATGGCACAACAAGTCCATTTCTGAACATGACT | 25942 |
| gb:MT027062 | Organism:Severe | CTTCTTCAATTGTCATTACTTCAGGTGATGGCACAACAAGTCCATTTCTGAACATGACT | 25942 |
| gb:MT019529 | Organism:Severe | CTTCTTCAATTGTCATTACTTCAGGTGATGGCACAACAAGTCCATTTCTGAACATGACT | 25942 |
| gb:MN996529 | Organism:Severe | CTTCTTCAATTGTCATTACTTCAGGTGATGGCACAACAAGTCCATTTCTGAACATGACT | 25930 |
| gb:MN996531 | Organism:Severe | CTTCTTCAATTGTCATTACTTCAGGTGATGGCACAACAAGTCCATTTCTGAACATGACT | 25929 |
| gb:MT066176 | Organism:Severe | CTTCTTCAATTGTCATTACTTCAGGTGATGGCACAACAAGTCCATTTCTGAACATGACT | 25942 |
| gb:MT027064 | Organism:Severe | CTTCTTCAATTGTCATTACTTCAGGTGATGGCACAACAAGTCCATTTCTGAACATGACT | 25942 |
| gb:MN994468 | Organism:Severe | CTTCTTCAATTGTCATTACTTCAGGTGATGGCACAACAAGTCCATTTCTGAACATGACT | 25942 |
| gb:MT072688 | Organism:Severe | CTTCTTCAATTGTCATTACTTCAGGTGATGGCACAACAAGTCCATTTCTGAACATGACT | 25927 |
| gb:MN996527 | Organism:Severe | CTTCTTCAATTGTCATTACTTCAGGTGATGGCACAACAAGTCCATTTCTGAACATGACT | 25909 |
| gb:MT093631 | Organism:Severe | CTTCTTCAATTGTCATTACTTCAGGTGATGGCACAACAAGTCCATTTCTGAACATGACT | 25980 |
| gb:MT106053 | Organism:Severe | CTTCTTCAATTGTCATTACTTCAGGTGATGGCACAACAAGTCCATTTCTGAACATGACT | 25942 |
| gb:MT019533 | Organism:Severe | CTTCTTCAATTGTCATTACTTCAGGTGATGGCACAACAAGTCCATTTCTGAACATGACT | 25942 |
| gb:MT019531 | Organism:Severe | CTTCTTCAATTGTCATTACTTCAGGTGATGGCACAACAAGTCCATTTCTGAACATGACT | 25942 |
| gb:MN996528 | Organism:Severe | CTTCTTCAATTGTCATTACTTCAGGTGATGGCACAACAAGTCCATTTCTGAACATGACT | 25942 |
| gb:MN996530 | Organism:Severe | CTTCTTCAATTGTCATTACTTCAGGTGATGGCACAACAAGTCCATTTCTGAACATGACT | 25928 |
| gb:MN908947 | Organism:Severe | CTTCTTCAATTGTCATTACTTCAGGTGATGGCACAACAAGTCCATTTCTGAACATGACT | 25942 |
| gb:MT019532 | Organism:Severe | CTTCTTCAATTGTCATTACTTCAGGTGATGGCACAACAAGTCCATTTCTGAACATGACT | 25942 |

\*\*\*\*\*

|             |                 |                                                              |       |
|-------------|-----------------|--------------------------------------------------------------|-------|
| gb:MT020781 | Organism:Severe | ACCAGATTGGTGGTTATACTGAAAAATGGGAATCTGGAGTAAAAGACTGTGTTGTATTAC | 25990 |
| gb:MT007544 | Organism:Severe | ACCAGATTGGTGGTTATACTGAAAAATGGGAATCTGGAGTAAAAGACTGTGTTGTATTAC | 26002 |
| gb:MN994467 | Organism:Severe | ACCAGATTGGTGGTTATACTGAAAAATGGGAATCTGGAGTAAAAGACTGTGTTGTATTAC | 26002 |
| gb:MT044257 | Organism:Severe | ACCAGATTGGTGGTTATACTGAAAAATGGGAATCTGGAGTAAAAGACTGTGTTGTATTAC | 26002 |
| gb:MT106054 | Organism:Severe | ACCAGATTGGTGGTTATACTGAAAAATGGGAATCTGGAGTAAAAGACTGTGTTGTATTAC | 26002 |
| gb:MT049951 | Organism:Severe | ACCAGATTGGTGGTTATACTGAAAAATGGGAATCTGGAGTAAAAGACTGTGTTGTATTAC | 26002 |
| gb:MN975262 | Organism:Severe | ACCAGATTGGTGGTTATACTGAAAAATGGGAATCTGGAGTAAAAGACTGTGTTGTATTAC | 26002 |
| gb:MT106052 | Organism:Severe | ACCAGATTGGTGGTTATACTGAAAAATGGGAATCTGGAGTAAAAGACTGTGTTGTATTAC | 26002 |
| gb:LC522975 | Organism:Severe | ACCAGATTGGTGGTTATACTGAAAAATGGGAATCTGGAGTAAAAGACTGTGTTGTATTAC | 25999 |
| gb:LC522973 | Organism:Severe | ACCAGATTGGTGGTTATACTGAAAAATGGGAATCTGGAGTAAAAGACTGTGTTGTATTAC | 25999 |
| gb:LC522974 | Organism:Severe | ACCAGATTGGTGGTTATACTGAAAAATGGGAATCTGGAGTAAAAGACTGTGTTGTATTAC | 25999 |
| gb:MN985325 | Organism:Severe | ACCAGATTGGTGGTTATACTGAAAAATGGGAATCTGGAGTAAAAGACTGTGTTGTATTAC | 26002 |
| gb:MT020881 | Organism:Severe | ACCAGATTGGTGGTTATACTGAAAAATGGGAATCTGGAGTAAAAGACTGTGTTGTATTAC | 26002 |
| gb:MT020880 | Organism:Severe | ACCAGATTGGTGGTTATACTGAAAAATGGGAATCTGGAGTAAAAGACTGTGTTGTATTAC | 26002 |
| gb:MT066175 | Organism:Severe | ACCAGATTGGTGGTTATACTGAAAAATGGGAATCTGGAGTAAAAGACTGTGTTGTATTAC | 26002 |
| gb:MN997409 | Organism:Severe | ACCAGATTGGTGGTTATACTGAAAAATGGGAATCTGGAGTAAAAGACTGTGTTGTATTAC | 26002 |
| gb:MN938384 | Organism:Severe | ACCAGATTGGTGGTTATACTGAAAAATGGGAATCTGGAGTAAAAGACTGTGTTGTATTAC | 25970 |
| gb:MT044258 | Organism:Severe | ACCAGATTGGTGGTTATACTGAAAAATGGGAATCTGGAGTAAAAGACTGTGTTGTATTAC | 25978 |
| gb:MT039890 | Organism:Severe | ACCAGATTGGTGGTTATACTGAAAAATGGGAATCTGGAGTAAAAGACTGTGTTGTATTAC | 26002 |
| gb:MN988713 | Organism:Severe | ACCAGATTGGTGGTTATACTGAAAAATGGGAATCTGGAGTAAAAGACTGTGTTGTATTAC | 26002 |
| gb:LC521925 | Organism:Severe | ACCAGATTGGTGGTTATACTGAAAAATGGGAATCTGGAGTAAAAGACTGTGTTGTATTAC | 25975 |
| gb:MT093571 | Organism:Severe | ACCAGATTGGTGGTTATACTGAAAAATGGGAATCTGGAGTAAAAGACTGTGTTGTATTAC | 26002 |
| gb:MT039887 | Organism:Severe | ACCAGATTGGTGGTTATACTGAAAAATGGGAATCTGGAGTAAAAGACTGTGTTGTATTAC | 25999 |
| gb:MT019530 | Organism:Severe | ACCAGATTGGTGGTTATACTGAAAAATGGGAATCTGGAGTAAAAGACTGTGTTGTATTAC | 26002 |
| gb:MT039888 | Organism:Severe | ACCAGATTGGTGGTTATACTGAAAAATGGGAATCTGGAGTAAAAGACTGTGTTGTATTAC | 26002 |
| gb:LC522972 | Organism:Severe | ACCAGATTGGTGGTTATACTGAAAAATGGGAATCTGGAGTAAAAGACTGTGTTGTATTAC | 25999 |
| gb:MT027063 | Organism:Severe | ACCAGATTGGTGGTTATACTGAAAAATGGGAATCTGGAGTAAAAGACTGTGTTGTATTAC | 26002 |
| gb:MT027062 | Organism:Severe | ACCAGATTGGTGGTTATACTGAAAAATGGGAATCTGGAGTAAAAGACTGTGTTGTATTAC | 26002 |
| gb:MT019529 | Organism:Severe | ACCAGATTGGTGGTTATACTGAAAAATGGGAATCTGGAGTAAAAGACTGTGTTGTATTAC | 26002 |
| gb:MN996529 | Organism:Severe | ACCAGATTGGTGGTTATACTGAAAAATGGGAATCTGGAGTAAAAGACTGTGTTGTATTAC | 25990 |
| gb:MN996531 | Organism:Severe | ACCAGATTGGTGGTTATACTGAAAAATGGGAATCTGGAGTAAAAGACTGTGTTGTATTAC | 25989 |
| gb:MT066176 | Organism:Severe | ACCAGATTGGTGGTTATACTGAAAAATGGGAATCTGGAGTAAAAGACTGTGTTGTATTAC | 26002 |
| gb:MT027064 | Organism:Severe | ACCAGATTGGTGGTTATACTGAAAAATGGGAATCTGGAGTAAAAGACTGTGTTGTATTAC | 26002 |

|             |                 |                                                              |       |
|-------------|-----------------|--------------------------------------------------------------|-------|
| gb:MN994468 | Organism:Severe | ACCAGATTGGTGGTTATACTGAAAAATGGGAATCTGGAGTAAAAGACTGTGTTGTATTAC | 26002 |
| gb:MT072688 | Organism:Severe | ACCAGATTGGTGGTTATACTGAAAAATGGGAATCTGGAGTAAAAGACTGTGTTGTATTAC | 25987 |
| gb:MN996527 | Organism:Severe | ACCAGATTGGTGGTTATACTGAAAAATGGGAATCTGGAGTAAAAGACTGTGTTGTATTAC | 25969 |
| gb:MT093631 | Organism:Severe | ACCAGATTGGTGGTTATACTGAAAAATGGGAATCTGGAGTAAAAGACTGTGTTGTATTAC | 26040 |
| gb:MT106053 | Organism:Severe | ACCAGATTGGTGGTTATACTGAAAAATGGGAATCTGGAGTAAAAGACTGTGTTGTATTAC | 26002 |
| gb:MT019533 | Organism:Severe | ACCAGATTGGTGGTTATACTGAAAAATGGGAATCTGGAGTAAAAGACTGTGTTGTATTAC | 26002 |
| gb:MT019531 | Organism:Severe | ACCAGATTGGTGGTTATACTGAAAAATGGGAATCTGGAGTAAAAGACTGTGTTGTATTAC | 26002 |
| gb:MN996528 | Organism:Severe | ACCAGATTGGTGGTTATACTGAAAAATGGGAATCTGGAGTAAAAGACTGTGTTGTATTAC | 26002 |
| gb:MN996530 | Organism:Severe | ACCAGATTGGTGGTTATACTGAAAAATGGGAATCTGGAGTAAAAGACTGTGTTGTATTAC | 25988 |
| gb:MN908947 | Organism:Severe | ACCAGATTGGTGGTTATACTGAAAAATGGGAATCTGGAGTAAAAGACTGTGTTGTATTAC | 26002 |
| gb:MT019532 | Organism:Severe | ACCAGATTGGTGGTTATACTGAAAAATGGGAATCTGGAGTAAAAGACTGTGTTGTATTAC | 26002 |

\*\*\*\*\*

|             |                 |                                                               |       |
|-------------|-----------------|---------------------------------------------------------------|-------|
| gb:MT020781 | Organism:Severe | ACAGTTACTTCAC TTCAGACTATTACCAGCTGTACTCAACTCAATTGAGTACAGACACTG | 26050 |
| gb:MT007544 | Organism:Severe | ACAGTTACTTCAC TTCAGACTATTACCAGCTGTACTCAACTCAATTGAGTACAGACACTG | 26062 |
| gb:MN994467 | Organism:Severe | ACAGTTACTTCAC TTCAGACTATTACCAGCTGTACTCAACTCAATTGAGTACAGACACTG | 26062 |
| gb:MT044257 | Organism:Severe | ACAGTTACTTCAC TTCAGACTATTACCAGCTGTACTCAACTCAATTGAGTACAGACACTG | 26062 |
| gb:MT106054 | Organism:Severe | ACAGTTACTTCAC TTCAGACTATTACCAGCTGTACTCAACTCAATTGAGTACAGACACTG | 26062 |
| gb:MT049951 | Organism:Severe | ACAGTTACTTCAC TTCAGACTATTACCAGCTGTACTCAACTCAATTGAGTACAGACACTG | 26062 |
| gb:MN975262 | Organism:Severe | ACAGTTACTTCAC TTCAGACTATTACCAGCTGTACTCAACTCAATTGAGTACAGACACTG | 26062 |
| gb:MT106052 | Organism:Severe | ACAGTTACTTCAC TTCAGACTATTACCAGCTGTACTCAACTCAATTGAGTACAGACACTG | 26062 |
| gb:LC522975 | Organism:Severe | ACAGTTACTTCAC TTCAGACTATTACCAGCTGTACTCAACTCAATTGAGTACAGACACTG | 26059 |
| gb:LC522973 | Organism:Severe | ACAGTTACTTCAC TTCAGACTATTACCAGCTGTACTCAACTCAATTGAGTACAGACACTG | 26059 |
| gb:LC522974 | Organism:Severe | ACAGTTACTTCAC TTCAGACTATTACCAGCTGTACTCAACTCAATTGAGTACAGACACTG | 26059 |
| gb:MN985325 | Organism:Severe | ACAGTTACTTCAC TTCAGACTATTACCAGCTGTACTCAACTCAATTGAGTACAGACACTG | 26062 |
| gb:MT020881 | Organism:Severe | ACAGTTACTTCAC TTCAGACTATTACCAGCTGTACTCAACTCAATTGAGTACAGACACTG | 26062 |
| gb:MT020880 | Organism:Severe | ACAGTTACTTCAC TTCAGACTATTACCAGCTGTACTCAACTCAATTGAGTACAGACACTG | 26062 |
| gb:MT066175 | Organism:Severe | ACAGTTACTTCAC TTCAGACTATTACCAGCTGTACTCAACTCAATTGAGTACAGACACTG | 26062 |
| gb:MN997409 | Organism:Severe | ACAGTTACTTCAC TTCAGACTATTACCAGCTGTACTCAACTCAATTGAGTACAGACACTG | 26062 |
| gb:MN938384 | Organism:Severe | ACAGTTACTTCAC TTCAGACTATTACCAGCTGTACTCAACTCAATTGAGTACAGACACTG | 26030 |
| gb:MT044258 | Organism:Severe | ACAGTTACTTCAC TTCAGACTATTACCAGCTGTACTCAACTCAATTGAGTACAGACACTG | 26038 |
| gb:MT039890 | Organism:Severe | ACAGTTACTTCAC TTCAGACTATTACCAGCTGTACTCAACTCAATTGAGTACAGACACTG | 26062 |
| gb:MN988713 | Organism:Severe | ACAGTTACTTCAC TTCAGACTATTACCAGCTGTACTCAACTCAATTGAGTACAGACACTG | 26062 |
| gb:LC521925 | Organism:Severe | ACAGTTACTTCAC TTCAGACTATTACCAGCTGTACTCAACTCAATTGAGTACAGACACTG | 26035 |
| gb:MT093571 | Organism:Severe | ACAGTTACTTCAC TTCAGACTATTACCAGCTGTACTCAACTCAATTGAGTACAGACACTG | 26062 |
| gb:MT039887 | Organism:Severe | ACAGTTACTTCAC TTCAGACTATTACCAGCTGTACTCAACTCAATTGAGTACAGACACTG | 26059 |
| gb:MT019530 | Organism:Severe | ACAGTTACTTCAC TTCAGACTATTACCAGCTGTACTCAACTCAATTGAGTACAGACACTG | 26062 |
| gb:MT039888 | Organism:Severe | ACAGTTACTTCAC TTCAGACTATTACCAGCTGTACTCAACTCAATTGAGTACAGACACTG | 26062 |
| gb:LC522972 | Organism:Severe | ACAGTTACTTCAC TTCAGACTATTACCAGCTGTACTCAACTCAATTGAGTACAGACACTG | 26059 |
| gb:MT027063 | Organism:Severe | ACAGTTACTTCAC TTCAGACTATTACCAGCTGTACTCAACTCAATTGAGTACAGACACTG | 26062 |
| gb:MT027062 | Organism:Severe | ACAGTTACTTCAC TTCAGACTATTACCAGCTGTACTCAACTCAATTGAGTACAGACACTG | 26062 |
| gb:MT019529 | Organism:Severe | ACAGTTACTTCAC TTCAGACTATTACCAGCTGTACTCAACTCAATTGAGTACAGACACTG | 26062 |
| gb:MN996529 | Organism:Severe | ACAGTTACTTCAC TTCAGACTATTACCAGCTGTACTCAACTCAATTGAGTACAGACACTG | 26050 |
| gb:MN996531 | Organism:Severe | ACAGTTACTTCAC TTCAGACTATTACCAGCTGTACTCAACTCAATTGAGTACAGACACTG | 26049 |
| gb:MT066176 | Organism:Severe | ACAGTTACTTCAC TTCAGACTATTACCAGCTGTACTCAACTCAATTGAGTACAGACACTG | 26062 |
| gb:MT027064 | Organism:Severe | ACAGTTACTTCAC TTCAGACTATTACCAGCTGTACTCAACTCAATTGAGTACAGACACTG | 26062 |
| gb:MN994468 | Organism:Severe | ACAGTTACTTCAC TTCAGACTATTACCAGCTGTACTCAACTCAATTGAGTACAGACACTG | 26062 |
| gb:MT072688 | Organism:Severe | ACAGTTACTTCAC TTCAGACTATTACCAGCTGTACTCAACTCAATTGAGTACAGACACTG | 26047 |
| gb:MN996527 | Organism:Severe | ACAGTTACTTCAC TTCAGACTATTACCAGCTGTACTCAACTCAATTGAGTACAGACACTG | 26029 |
| gb:MT093631 | Organism:Severe | ACAGTTACTTCAC TTCAGACTATTACCAGCTGTACTCAACTCAATTGAGTACAGACACTG | 26100 |
| gb:MT106053 | Organism:Severe | ACAGTTACTTCAC TTCAGACTATTACCAGCTGTACTCAACTCAATTGAGTACAGACACTG | 26062 |
| gb:MT019533 | Organism:Severe | ACAGTTACTTCAC TTCAGACTATTACCAGCTGTACTCAACTCAATTGAGTACAGACACTG | 26062 |
| gb:MT019531 | Organism:Severe | ACAGTTACTTCAC TTCAGACTATTACCAGCTGTACTCAACTCAATTGAGTACAGACACTG | 26062 |
| gb:MN996528 | Organism:Severe | ACAGTTACTTCAC TTCAGACTATTACCAGCTGTACTCAACTCAATTGAGTACAGACACTG | 26062 |
| gb:MN996530 | Organism:Severe | ACAGTTACTTCAC TTCAGACTATTACCAGCTGTACTCAACTCAATTGAGTACAGACACTG | 26048 |
| gb:MN908947 | Organism:Severe | ACAGTTACTTCAC TTCAGACTATTACCAGCTGTACTCAACTCAATTGAGTACAGACACTG | 26062 |
| gb:MT019532 | Organism:Severe | ACAGTTACTTCAC TTCAGACTATTACCAGCTGTACTCAACTCAATTGAGTACAGACACTG | 26062 |

\*\*\*\*\*

|             |                 |                                                                |       |
|-------------|-----------------|----------------------------------------------------------------|-------|
| gb:MT020781 | Organism:Severe | GTGTTGAACATGTTAC TTTCTTCATCTACAATAAAATTTGTTGATGAGCCTGAAGAACATG | 26110 |
| gb:MT007544 | Organism:Severe | GTGTTGAACATGTTAC TTTCTTCATCTACAATAAAATTTGTTGATGAGCCTGAAGAACATG | 26122 |
| gb:MN994467 | Organism:Severe | GTGTTGAACATGTTAC TTTCTTCATCTACAATAAAATTTGTTGATGAGCCTGAAGAACATG | 26122 |
| gb:MT044257 | Organism:Severe | GTGTTGAACATGTTAC TTTCTTCATCTACAATAAAATTTGTTGATGAGCCTGAAGAACATG | 26122 |
| gb:MT106054 | Organism:Severe | GTGTTGAACATGTTAC TTTCTTCATCTACAATAAAATTTGTTGATGAGCCTGAAGAACATG | 26122 |
| gb:MT049951 | Organism:Severe | GTGTTGAACATGTTAC TTTCTTCATCTACAATAAAATTTGTTGATGAGCCTGAAGAACATG | 26122 |



|             |                 |                                                               |       |
|-------------|-----------------|---------------------------------------------------------------|-------|
| gb:LC522972 | Organism:Severe | TCCAAATTCACACAATCGACGGTTTCATCCGGAGTTGTTAATCCAGTAATGGAACCAATTT | 26179 |
| gb:MT027063 | Organism:Severe | TCCAAATTCACACAATCGACGGTTTCATCCGGAGTTGTTAATCCAGTAATGGAACCAATTT | 26182 |
| gb:MT027062 | Organism:Severe | TCCAAATTCACACAATCGACGGTTTCATCCGGAGTTGTTAATCCAGTAATGGAACCAATTT | 26182 |
| gb:MT019529 | Organism:Severe | TCCAAATTCACACAATCGACGGTTTCATCCGGAGTTGTTAATCCAGTAATGGAACCAATTT | 26182 |
| gb:MN996529 | Organism:Severe | TCCAAATTCACACAATCGACGGTTTCATCCGGAGTTGTTAATCCAGTAATGGAACCAATTT | 26170 |
| gb:MN996531 | Organism:Severe | TCCAAATTCACACAATCGACGGTTTCATCCGGAGTTGTTAATCCAGTAATGGAACCAATTT | 26169 |
| gb:MT066176 | Organism:Severe | TCCAAATTCACACAATCGACGGTTTCATCCGGAGTTGTTAATCCAGTAATGGAACCAATTT | 26182 |
| gb:MT027064 | Organism:Severe | TCCAAATTCACACAATCGACGGTTTCATCCGGAGTTGTTAATCCAGTAATGGAACCAATTT | 26182 |
| gb:MN994468 | Organism:Severe | TCCAAATTCACACAATCGACGGTTTCATCCGGAGTTGTTAATCCAGTAATGGAACCAATTT | 26182 |
| gb:MT072688 | Organism:Severe | TCCAAATTCACACAATCGACGGTTTCATCCGGAGTTGTTAATCCAGTAATGGAACCAATTT | 26167 |
| gb:MN996527 | Organism:Severe | TCCAAATTCACACAATCGACGGTTTCATCCGGAGTTGTTAATCCAGTAATGGAACCAATTT | 26149 |
| gb:MT093631 | Organism:Severe | TCCAAATTCACACAATCGACGGTTTCATCCGGAGTTGTTAATCCAGTAATGGAACCAATTT | 26220 |
| gb:MT106053 | Organism:Severe | TCCAAATTCACACAATCGACGGTTTCATCCGGAGTTGTTAATCCAGTAATGGAACCAATTT | 26182 |
| gb:MT019533 | Organism:Severe | TCCAAATTCACACAATCGACGGTTTCATCCGGAGTTGTTAATCCAGTAATGGAACCAATTT | 26182 |
| gb:MT019531 | Organism:Severe | TCCAAATTCACACAATCGACGGTTTCATCCGGAGTTGTTAATCCAGTAATGGAACCAATTT | 26182 |
| gb:MN996528 | Organism:Severe | TCCAAATTCACACAATCGACGGTTTCATCCGGAGTTGTTAATCCAGTAATGGAACCAATTT | 26182 |
| gb:MN996530 | Organism:Severe | TCCAAATTCACACAATCGACGGTTTCATCCGGAGTTGTTAATCCAGTAATGGAACCAATTT | 26168 |
| gb:MN908947 | Organism:Severe | TCCAAATTCACACAATCGACGGTTTCATCCGGAGTTGTTAATCCAGTAATGGAACCAATTT | 26182 |
| gb:MT019532 | Organism:Severe | TCCAAATTCACACAATCGACGGTTTCATCCGGAGTTGTTAATCCAGTAATGGAACCAATTT | 26182 |

\*\*\*\*\*

|             |                 |                                                              |       |
|-------------|-----------------|--------------------------------------------------------------|-------|
| gb:MT020781 | Organism:Severe | ATGATGAACCGACGACGACTACTAGCGTGCCTTTGTAAGCACAAGCTGATGAGTACGAAC | 26230 |
| gb:MT007544 | Organism:Severe | ATGATGAACCGACGACGACTACTAGCGTGCCTTTGTAAGCACAAGCTGATGAGTACGAAC | 26242 |
| gb:MN994467 | Organism:Severe | ATGATGAACCGACGACGACTACTAGCGTGCCTTTGTAAGCACAAGCTGATGAGTACGAAC | 26242 |
| gb:MT044257 | Organism:Severe | ATGATGAACCGACGACGACTACTAGCGTGCCTTTGTAAGCACAAGCTGATGAGTACGAAC | 26242 |
| gb:MT106054 | Organism:Severe | ATGATGAACCGACGACGACTACTAGCGTGCCTTTGTAAGCACAAGCTGATGAGTACGAAC | 26242 |
| gb:MT049951 | Organism:Severe | ATGATGAACCGACGACGACTACTAGCGTGCCTTTGTAAGCACAAGCTGATGAGTACGAAC | 26242 |
| gb:MN975262 | Organism:Severe | ATGATGAACCGACGACGACTACTAGCGTGCCTTTGTAAGCACAAGCTGATGAGTACGAAC | 26242 |
| gb:MT106052 | Organism:Severe | ATGATGAACCGACGACGACTACTAGCGTGCCTTTGTAAGCACAAGCTGATGAGTACGAAC | 26242 |
| gb:LC522975 | Organism:Severe | ATGATGAACCGACGACGACTACTAGCGTGCCTTTGTAAGCACAAGCTGATGAGTACGAAC | 26239 |
| gb:LC522973 | Organism:Severe | ATGATGAACCGACGACGACTACTAGCGTGCCTTTGTAAGCACAAGCTGATGAGTACGAAC | 26239 |
| gb:LC522974 | Organism:Severe | ATGATGAACCGACGACGACTACTAGCGTGCCTTTGTAAGCACAAGCTGATGAGTACGAAC | 26239 |
| gb:MN985325 | Organism:Severe | ATGATGAACCGACGACGACTACTAGCGTGCCTTTGTAAGCACAAGCTGATGAGTACGAAC | 26242 |
| gb:MT020881 | Organism:Severe | ATGATGAACCGACGACGACTACTAGCGTGCCTTTGTAAGCACAAGCTGATGAGTACGAAC | 26242 |
| gb:MT020880 | Organism:Severe | ATGATGAACCGACGACGACTACTAGCGTGCCTTTGTAAGCACAAGCTGATGAGTACGAAC | 26242 |
| gb:MT066175 | Organism:Severe | ATGATGAACCGACGACGACTACTAGCGTGCCTTTGTAAGCACAAGCTGATGAGTACGAAC | 26242 |
| gb:MN997409 | Organism:Severe | ATGATGAACCGACGACGACTACTAGCGTGCCTTTGTAAGCACAAGCTGATGAGTACGAAC | 26242 |
| gb:MN938384 | Organism:Severe | ATGATGAACCGACGACGACTACTAGCGTGCCTTTGTAAGCACAAGCTGATGAGTACGAAC | 26210 |
| gb:MT044258 | Organism:Severe | ATGATGAACCGACGACGACTACTAGCGTGCCTTTGTAAGCACAAGCTGATGAGTACGAAC | 26218 |
| gb:MT039890 | Organism:Severe | ATGATGAACCGACGACGACTACTAGCGTGCCTTTGTAAGCACAAGCTGATGAGTACGAAC | 26242 |
| gb:MN988713 | Organism:Severe | ATGATGAACCGACGACGACTACTAGCGTGCCTTTGTAAGCACAAGCTGATGAGTACGAAC | 26242 |
| gb:LC521925 | Organism:Severe | ATGATGAACCGACGACGACTACTAGCGTGCCTTTGTAAGCACAAGCTGATGAGTACGAAC | 26215 |
| gb:MT093571 | Organism:Severe | ATGATGAACCGACGACGACTACTAGCGTGCCTTTGTAAGCACAAGCTGATGAGTACGAAC | 26242 |
| gb:MT039887 | Organism:Severe | ATGATGAACCGACGACGACTACTAGCGTGCCTTTGTAAGCACAAGCTGATGAGTACGAAC | 26239 |
| gb:MT019530 | Organism:Severe | ATGATGAACCGACGACGACTACTAGCGTGCCTTTGTAAGCACAAGCTGATGAGTACGAAC | 26242 |
| gb:MT039888 | Organism:Severe | ATGATGAACCGACGACGACTACTAGCGTGCCTTTGTAAGCACAAGCTGATGAGTACGAAC | 26242 |
| gb:LC522972 | Organism:Severe | ATGATGAACCGACGACGACTACTAGCGTGCCTTTGTAAGCACAAGCTGATGAGTACGAAC | 26239 |
| gb:MT027063 | Organism:Severe | ATGATGAACCGACGACGACTACTAGCGTGCCTTTGTAAGCACAAGCTGATGAGTACGAAC | 26242 |
| gb:MT027062 | Organism:Severe | ATGATGAACCGACGACGACTACTAGCGTGCCTTTGTAAGCACAAGCTGATGAGTACGAAC | 26242 |
| gb:MT019529 | Organism:Severe | ATGATGAACCGACGACGACTACTAGCGTGCCTTTGTAAGCACAAGCTGATGAGTACGAAC | 26242 |
| gb:MN996529 | Organism:Severe | ATGATGAACCGACGACGACTACTAGCGTGCCTTTGTAAGCACAAGCTGATGAGTACGAAC | 26230 |
| gb:MN996531 | Organism:Severe | ATGATGAACCGACGACGACTACTAGCGTGCCTTTGTAAGCACAAGCTGATGAGTACGAAC | 26229 |
| gb:MT066176 | Organism:Severe | ATGATGAACCGACGACGACTACTAGCGTGCCTTTGTAAGCACAAGCTGATGAGTACGAAC | 26242 |
| gb:MT027064 | Organism:Severe | ATGATGAACCGACGACGACTACTAGCGTGCCTTTGTAAGCACAAGCTGATGAGTACGAAC | 26242 |
| gb:MN994468 | Organism:Severe | ATGATGAACCGACGACGACTACTAGCGTGCCTTTGTAAGCACAAGCTGATGAGTACGAAC | 26242 |
| gb:MT072688 | Organism:Severe | ATGATGAACCGACGACGACTACTAGCGTGCCTTTGTAAGCACAAGCTGATGAGTACGAAC | 26227 |
| gb:MN996527 | Organism:Severe | ATGATGAACCGACGACGACTACTAGCGTGCCTTTGTAAGCACAAGCTGATGAGTACGAAC | 26209 |
| gb:MT093631 | Organism:Severe | ATGATGAACCGACGACGACTACTAGCGTGCCTTTGTAAGCACAAGCTGATGAGTACGAAC | 26280 |
| gb:MT106053 | Organism:Severe | ATGATGAACCGACGACGACTACTAGCGTGCCTTTGTAAGCACAAGCTGATGAGTACGAAC | 26242 |
| gb:MT019533 | Organism:Severe | ATGATGAACCGACGACGACTACTAGCGTGCCTTTGTAAGCACAAGCTGATGAGTACGAAC | 26242 |
| gb:MT019531 | Organism:Severe | ATGATGAACCGACGACGACTACTAGCGTGCCTTTGTAAGCACAAGCTGATGAGTACGAAC | 26242 |
| gb:MN996528 | Organism:Severe | ATGATGAACCGACGACGACTACTAGCGTGCCTTTGTAAGCACAAGCTGATGAGTACGAAC | 26242 |
| gb:MN996530 | Organism:Severe | ATGATGAACCGACGACGACTACTAGCGTGCCTTTGTAAGCACAAGCTGATGAGTACGAAC | 26228 |
| gb:MN908947 | Organism:Severe | ATGATGAACCGACGACGACTACTAGCGTGCCTTTGTAAGCACAAGCTGATGAGTACGAAC | 26242 |
| gb:MT019532 | Organism:Severe | ATGATGAACCGACGACGACTACTAGCGTGCCTTTGTAAGCACAAGCTGATGAGTACGAAC | 26242 |

\*\*\*\*\*

|             |                  |                                                               |       |
|-------------|------------------|---------------------------------------------------------------|-------|
| gb:MT020781 | Organism: Severe | TTATGTACTCATTTCGTTTCGGAAGAGACAGGTACGTTAATAGTTAATAGCGTACTTCTTT | 26290 |
| gb:MT007544 | Organism: Severe | TTATGTACTCATTTCGTTTCGGAAGAGACAGGTACGTTAATAGTTAATAGCGTACTTCTTT | 26302 |
| gb:MN994467 | Organism: Severe | TTATGTACTCATTTCGTTTCGGAAGAGACAGGTACGTTAATAGTTAATAGCGTACTTCTTT | 26302 |
| gb:MT044257 | Organism: Severe | TTATGTACTCATTTCGTTTCGGAAGAGACAGGTACGTTAATAGTTAATAGCGTACTTCTTT | 26302 |
| gb:MT106054 | Organism: Severe | TTATGTACTCATTTCGTTTCGGAAGAGACAGGTACGTTAATAGTTAATAGCGTACTTCTTT | 26302 |
| gb:MT049951 | Organism: Severe | TTATGTACTCATTTCGTTTCGGAAGAGACAGGTACGTTAATAGTTAATAGCGTACTTCTTT | 26302 |
| gb:MN975262 | Organism: Severe | TTATGTACTCATTTCGTTTCGGAAGAGACAGGTACGTTAATAGTTAATAGCGTACTTCTTT | 26302 |
| gb:MT106052 | Organism: Severe | TTATGTACTCATTTCGTTTCGGAAGAGACAGGTACGTTAATAGTTAATAGCGTACTTCTTT | 26302 |
| gb:LC522975 | Organism: Severe | TTATGTACTCATTTCGTTTCGGAAGAGACAGGTACGTTAATAGTTAATAGCGTACTTCTTT | 26299 |
| gb:LC522973 | Organism: Severe | TTATGTACTCATTTCGTTTCGGAAGAGACAGGTACGTTAATAGTTAATAGCGTACTTCTTT | 26299 |
| gb:LC522974 | Organism: Severe | TTATGTACTCATTTCGTTTCGGAAGAGACAGGTACGTTAATAGTTAATAGCGTACTTCTTT | 26299 |
| gb:MN985325 | Organism: Severe | TTATGTACTCATTTCGTTTCGGAAGAGACAGGTACGTTAATAGTTAATAGCGTACTTCTTT | 26302 |
| gb:MT020881 | Organism: Severe | TTATGTACTCATTTCGTTTCGGAAGAGACAGGTACGTTAATAGTTAATAGCGTACTTCTTT | 26302 |
| gb:MT020880 | Organism: Severe | TTATGTACTCATTTCGTTTCGGAAGAGACAGGTACGTTAATAGTTAATAGCGTACTTCTTT | 26302 |
| gb:MT066175 | Organism: Severe | TTATGTACTCATTTCGTTTCGGAAGAGACAGGTACGTTAATAGTTAATAGCGTACTTCTTT | 26302 |
| gb:MN997409 | Organism: Severe | TTATGTACTCATTTCGTTTCGGAAGAGACAGGTACGTTAATAGTTAATAGCGTACTTCTTT | 26302 |
| gb:MN938384 | Organism: Severe | TTATGTACTCATTTCGTTTCGGAAGAGACAGGTACGTTAATAGTTAATAGCGTACTTCTTT | 26270 |
| gb:MT044258 | Organism: Severe | TTATGTACTCATTTCGTTTCGGAAGAGACAGGTACGTTAATAGTTAATAGCGTACTTCTTT | 26278 |
| gb:MT039890 | Organism: Severe | TTATGTACTCATTTCGTTTCGGAAGAGACAGGTACGTTAATAGTTAATAGCGTACTTCTTT | 26302 |
| gb:MN988713 | Organism: Severe | TTATGTACTCATTTCGTTTCGGAAGAGACAGGTACGTTAATAGTTAATAGCGTACTTCTTT | 26302 |
| gb:LC521925 | Organism: Severe | TTATGTACTCATTTCGTTTCGGAAGAGACAGGTACGTTAATAGTTAATAGCGTACTTCTTT | 26275 |
| gb:MT093571 | Organism: Severe | TTATGTACTCATTTCGTTTCGGAAGAGACAGGTACGTTAATAGTTAATAGCGTACTTCTTT | 26302 |
| gb:MT039887 | Organism: Severe | TTATGTACTCATTTCGTTTCGGAAGAGACAGGTACGTTAATAGTTAATAGCGTACTTCTTT | 26299 |
| gb:MT019530 | Organism: Severe | TTATGTACTCATTTCGTTTCGGAAGAGACAGGTACGTTAATAGTTAATAGCGTACTTCTTT | 26302 |
| gb:MT039888 | Organism: Severe | TTATGTACTCATTTCGTTTCGGAAGAGACAGGTACGTTAATAGTTAATAGCGTACTTCTTT | 26302 |
| gb:LC522972 | Organism: Severe | TTATGTACTCATTTCGTTTCGGAAGAGACAGGTACGTTAATAGTTAATAGCGTACTTCTTT | 26299 |
| gb:MT027063 | Organism: Severe | TTATGTACTCATTTCGTTTCGGAAGAGACAGGTACGTTAATAGTTAATAGCGTACTTCTTT | 26302 |
| gb:MT027062 | Organism: Severe | TTATGTACTCATTTCGTTTCGGAAGAGACAGGTACGTTAATAGTTAATAGCGTACTTCTTT | 26302 |
| gb:MT019529 | Organism: Severe | TTATGTACTCATTTCGTTTCGGAAGAGACAGGTACGTTAATAGTTAATAGCGTACTTCTTT | 26302 |
| gb:MN996529 | Organism: Severe | TTATGTACTCATTTCGTTTCGGAAGAGACAGGTACGTTAATAGTTAATAGCGTACTTCTTT | 26290 |
| gb:MN996531 | Organism: Severe | TTATGTACTCATTTCGTTTCGGAAGAGACAGGTACGTTAATAGTTAATAGCGTACTTCTTT | 26289 |
| gb:MT066176 | Organism: Severe | TTATGTACTCATTTCGTTTCGGAAGAGACAGGTACGTTAATAGTTAATAGCGTACTTCTTT | 26302 |
| gb:MT027064 | Organism: Severe | TTATGTACTCATTTCGTTTCGGAAGAGACAGGTACGTTAATAGTTAATAGCGTACTTCTTT | 26302 |
| gb:MN994468 | Organism: Severe | TTATGTACTCATTTCGTTTCGGAAGAGACAGGTACGTTAATAGTTAATAGCGTACTTCTTT | 26302 |
| gb:MT072688 | Organism: Severe | TTATGTACTCATTTCGTTTCGGAAGAGACAGGTACGTTAATAGTTAATAGCGTACTTCTTT | 26287 |
| gb:MN996527 | Organism: Severe | TTATGTACTCATTTCGTTTCGGAAGAGACAGGTACGTTAATAGTTAATAGCGTACTTCTTT | 26269 |
| gb:MT093631 | Organism: Severe | TTATGTACTCATTTCGTTTCGGAAGAGACAGGTACGTTAATAGTTAATAGCGTACTTCTTT | 26340 |
| gb:MT106053 | Organism: Severe | TTATGTACTCATTTCGTTTCGGAAGAGACAGGTACGTTAATAGTTAATAGCGTACTTCTTT | 26302 |
| gb:MT019533 | Organism: Severe | TTATGTACTCATTTCGTTTCGGAAGAGACAGGTACGTTAATAGTTAATAGCGTACTTCTTT | 26302 |
| gb:MT019531 | Organism: Severe | TTATGTACTCATTTCGTTTCGGAAGAGACAGGTACGTTAATAGTTAATAGCGTACTTCTTT | 26302 |
| gb:MN996528 | Organism: Severe | TTATGTACTCATTTCGTTTCGGAAGAGACAGGTACGTTAATAGTTAATAGCGTACTTCTTT | 26302 |
| gb:MN996530 | Organism: Severe | TTATGTACTCATTTCGTTTCGGAAGAGACAGGTACGTTAATAGTTAATAGCGTACTTCTTT | 26288 |
| gb:MN908947 | Organism: Severe | TTATGTACTCATTTCGTTTCGGAAGAGACAGGTACGTTAATAGTTAATAGCGTACTTCTTT | 26302 |
| gb:MT019532 | Organism: Severe | TTATGTACTCATTTCGTTTCGGAAGAGACAGGTACGTTAATAGTTAATAGCGTACTTCTTT | 26302 |

\*\*\*\*\*

|             |                  |                                                              |       |
|-------------|------------------|--------------------------------------------------------------|-------|
| gb:MT020781 | Organism: Severe | TTCTTGCTTTTCGTTGATTCTTGCTAGTTACACTAGCCATCCTTACTGCGCTTCGATTGT | 26350 |
| gb:MT007544 | Organism: Severe | TTCTTGCTTTTCGTTGATTCTTGCTAGTTACACTAGCCATCCTTACTGCGCTTCGATTGT | 26362 |
| gb:MN994467 | Organism: Severe | TTCTTGCTTTTCGTTGATTCTTGCTAGTTACACTAGCCATCCTTACTGCGCTTCGATTGT | 26362 |
| gb:MT044257 | Organism: Severe | TTCTTGCTTTTCGTTGATTCTTGCTAGTTACACTAGCCATCCTTACTGCGCTTCGATTGT | 26362 |
| gb:MT106054 | Organism: Severe | TTCTTGCTTTTCGTTGATTCTTGCTAGTTACACTAGCCATCCTTACTGCGCTTCGATTGT | 26362 |
| gb:MT049951 | Organism: Severe | TTCTTGCTTTTCGTTGATTCTTGCTAGTTACACTAGCCATCCTTACTGCGCTTCGATTGT | 26362 |
| gb:MN975262 | Organism: Severe | TTCTTGCTTTTCGTTGATTCTTGCTAGTTACACTAGCCATCCTTACTGCGCTTCGATTGT | 26362 |
| gb:MT106052 | Organism: Severe | TTCTTGCTTTTCGTTGATTCTTGCTAGTTACACTAGCCATCCTTACTGCGCTTCGATTGT | 26362 |
| gb:LC522975 | Organism: Severe | TTCTTGCTTTTCGTTGATTCTTGCTAGTTACACTAGCCATCCTTACTGCGCTTCGATTGT | 26359 |
| gb:LC522973 | Organism: Severe | TTCTTGCTTTTCGTTGATTCTTGCTAGTTACACTAGCCATCCTTACTGCGCTTCGATTGT | 26359 |
| gb:LC522974 | Organism: Severe | TTCTTGCTTTTCGTTGATTCTTGCTAGTTACACTAGCCATCCTTACTGCGCTTCGATTGT | 26359 |
| gb:MN985325 | Organism: Severe | TTCTTGCTTTTCGTTGATTCTTGCTAGTTACACTAGCCATCCTTACTGCGCTTCGATTGT | 26362 |
| gb:MT020881 | Organism: Severe | TTCTTGCTTTTCGTTGATTCTTGCTAGTTACACTAGCCATCCTTACTGCGCTTCGATTGT | 26362 |
| gb:MT020880 | Organism: Severe | TTCTTGCTTTTCGTTGATTCTTGCTAGTTACACTAGCCATCCTTACTGCGCTTCGATTGT | 26362 |
| gb:MT066175 | Organism: Severe | TTCTTGCTTTTCGTTGATTCTTGCTAGTTACACTAGCCATCCTTACTGCGCTTCGATTGT | 26362 |
| gb:MN997409 | Organism: Severe | TTCTTGCTTTTCGTTGATTCTTGCTAGTTACACTAGCCATCCTTACTGCGCTTCGATTGT | 26362 |
| gb:MN938384 | Organism: Severe | TTCTTGCTTTTCGTTGATTCTTGCTAGTTACACTAGCCATCCTTACTGCGCTTCGATTGT | 26330 |



|             |                 |                                                              |       |
|-------------|-----------------|--------------------------------------------------------------|-------|
| gb:MT044258 | Organism:Severe | TTCTTGCTTTTCGTTGATTCTTGCTAGTTACACTAGCCATCCTTACTGCGCTTCGATTGT | 26338 |
| gb:MT039890 | Organism:Severe | TTCTTGCTTTTCGTTGATTCTTGCTAGTTACACTAGCCATCCTTACTGCGCATCGATTGT | 26362 |
| gb:MN988713 | Organism:Severe | TTCTTGCTTTTCGTTGATTCTTGCTAGTTACACTAGCCATCCTTACTGCGCTTCGATTGT | 26362 |
| gb:LC521925 | Organism:Severe | TTCTTGCTTTTCGTTGATTCTTGCTAGTTACACTAGCCATCCTTACTGCGCTTCGATTGT | 26335 |
| gb:MT093571 | Organism:Severe | TTCTTGCTTTTCGTTGATTCTTGCTAGTTACACTAGCCATCCTTACTGCGCTTCGATTGT | 26362 |
| gb:MT039887 | Organism:Severe | TTCTTGCTTTTCGTTGATTCTTGCTAGTTACACTAGCCATCCTTACTGCGCTTCGATTGT | 26359 |
| gb:MT019530 | Organism:Severe | TTCTTGCTTTTCGTTGATTCTTGCTAGTTACACTAGCCATCCTTACTGCGCTTCGATTGT | 26362 |
| gb:MT039888 | Organism:Severe | TTCTTGCTTTTCGTTGATTCTTGCTAGTTACACTAGCCATCCTTACTGCGCTTCGATTGT | 26362 |
| gb:LC522972 | Organism:Severe | TTCTTGCTTTTCGTTGATTCTTGCTAGTTACACTAGCCATCCTTACTGCGCTTCGATTGT | 26359 |
| gb:MT027063 | Organism:Severe | TTCTTGCTTTTCGTTGATTCTTGCTAGTTACACTAGCCATCCTTACTGCGCTTCGATTGT | 26362 |
| gb:MT027062 | Organism:Severe | TTCTTGCTTTTCGTTGATTCTTGCTAGTTACACTAGCCATCCTTACTGCGCTTCGATTGT | 26362 |
| gb:MT019529 | Organism:Severe | TTCTTGCTTTTCGTTGATTCTTGCTAGTTACACTAGCCATCCTTACTGCGCTTCGATTGT | 26362 |
| gb:MN996529 | Organism:Severe | TTCTTGCTTTTCGTTGATTCTTGCTAGTTACACTAGCCATCCTTACTGCGCTTCGATTGT | 26350 |
| gb:MN996531 | Organism:Severe | TTCTTGCTTTTCGTTGATTCTTGCTAGTTACACTAGCCATCCTTACTGCGCTTCGATTGT | 26349 |
| gb:MT066176 | Organism:Severe | TTCTTGCTTTTCGTTGATTCTTGCTAGTTACACTAGCCATCCTTACTGCGCTTCGATTGT | 26362 |
| gb:MT027064 | Organism:Severe | TTCTTGCTTTTCGTTGATTCTTGCTAGTTACACTAGCCATCCTTACTGCGCTTCGATTGT | 26362 |
| gb:MN994468 | Organism:Severe | TTCTTGCTTTTCGTTGATTCTTGCTAGTTACACTAGCCATCCTTACTGCGCTTCGATTGT | 26362 |
| gb:MT072688 | Organism:Severe | TTCTTGCTTTTCGTTGATTCTTGCTAGTTACACTAGCCATCCTTACTGCGCTTCGATTGT | 26347 |
| gb:MN996527 | Organism:Severe | TTCTTGCTTTTCGTTGATTCTTGCTAGTTACACTAGCCATCCTTACTGCGCTTCGATTGT | 26329 |
| gb:MT093631 | Organism:Severe | TTCTTGCTTTTCGTTGATTCTTGCTAGTTACACTAGCCATCCTTACTGCGCTTCGATTGT | 26400 |
| gb:MT106053 | Organism:Severe | TTCTTGCTTTTCGTTGATTCTTGCTAGTTACACTAGCCATCCTTACTGCGCTTCGATTGT | 26362 |
| gb:MT019533 | Organism:Severe | TTCTTGCTTTTCGTTGATTCTTGCTAGTTACACTAGCCATCCTTACTGCGCTTCGATTGT | 26362 |
| gb:MT019531 | Organism:Severe | TTCTTGCTTTTCGTTGATTCTTGCTAGTTACACTAGCCATCCTTACTGCGCTTCGATTGT | 26362 |
| gb:MN996528 | Organism:Severe | TTCTTGCTTTTCGTTGATTCTTGCTAGTTACACTAGCCATCCTTACTGCGCTTCGATTGT | 26362 |
| gb:MN996530 | Organism:Severe | TTCTTGCTTTTCGTTGATTCTTGCTAGTTACACTAGCCATCCTTACTGCGCTTCGATTGT | 26348 |
| gb:MN908947 | Organism:Severe | TTCTTGCTTTTCGTTGATTCTTGCTAGTTACACTAGCCATCCTTACTGCGCTTCGATTGT | 26362 |
| gb:MT019532 | Organism:Severe | TTCTTGCTTTTCGTTGATTCTTGCTAGTTACACTAGCCATCCTTACTGCGCTTCGATTGT | 26362 |

\*\*\*\*\*

|             |                 |                                                               |       |
|-------------|-----------------|---------------------------------------------------------------|-------|
| gb:MT020781 | Organism:Severe | GTGCGTACTGCTGCAATATTGTTAACGTGAGTCTTGTA AAAACCTTCTTTTACGTTTACT | 26410 |
| gb:MT007544 | Organism:Severe | GTGCGTACTGCTGCAATATTGTTAACGTGAGTCTTGTA AAAACCTTCTTTTACGTTTACT | 26422 |
| gb:MN994467 | Organism:Severe | GTGCGTACTGCTGCAATATTGTTAACGTGAGTCTTGTA AAAACCTTCTTTTACGTTTACT | 26422 |
| gb:MT044257 | Organism:Severe | GTGCGTACTGCTGCAATATTGTTAACGTGAGTCTTGTA AAAACCTTCTTTTACGTTTACT | 26422 |
| gb:MT106054 | Organism:Severe | GTGCGTACTGCTGCAATATTGTTAACGTGAGTCTTGTA AAAACCTTCTTTTACGTTTACT | 26422 |
| gb:MT049951 | Organism:Severe | GTGCGTACTGCTGCAATATTGTTAACGTGAGTCTTGTA AAAACCTTCTTTTACGTTTACT | 26422 |
| gb:MN975262 | Organism:Severe | GTGCGTACTGCTGCAATATTGTTAACGTGAGTCTTGTA AAAACCTTCTTTTACGTTTACT | 26422 |
| gb:MT106052 | Organism:Severe | GTGCGTACTGCTGCAATATTGTTAACGTGAGTCTTGTA AAAACCTTCTTTTACGTTTACT | 26422 |
| gb:LC522975 | Organism:Severe | GTGCGTACTGCTGCAATATTGTTAACGTGAGTCTTGTA AAAACCTTCTTTTACGTTTACT | 26419 |
| gb:LC522973 | Organism:Severe | GTGCGTACTGCTGCAATATTGTTAACGTGAGTCTTGTA AAAACCTTCTTTTACGTTTACT | 26419 |
| gb:LC522974 | Organism:Severe | GTGCGTACTGCTGCAATATTGTTAACGTGAGTCTTGTA AAAACCTTCTTTTACGTTTACT | 26419 |
| gb:MN985325 | Organism:Severe | GTGCGTACTGCTGCAATATTGTTAACGTGAGTCTTGTA AAAACCTTCTTTTACGTTTACT | 26422 |
| gb:MT020881 | Organism:Severe | GTGCGTACTGCTGCAATATTGTTAACGTGAGTCTTGTA AAAACCTTCTTTTACGTTTACT | 26422 |
| gb:MT020880 | Organism:Severe | GTGCGTACTGCTGCAATATTGTTAACGTGAGTCTTGTA AAAACCTTCTTTTACGTTTACT | 26422 |
| gb:MT066175 | Organism:Severe | GTGCGTACTGCTGCAATATTGTTAACGTGAGTCTTGTA AAAACCTTCTTTTACGTTTACT | 26422 |
| gb:MN997409 | Organism:Severe | GTGCGTACTGCTGCAATATTGTTAACGTGAGTCTTGTA AAAACCTTCTTTTACGTTTACT | 26422 |
| gb:MN938384 | Organism:Severe | GTGCGTACTGCTGCAATATTGTTAACGTGAGTCTTGTA AAAACCTTCTTTTACGTTTACT | 26390 |
| gb:MT044258 | Organism:Severe | GTGCGTACTGCTGCAATATTGTTAACGTGAGTCTTGTA AAAACCTTCTTTTACGTTTACT | 26398 |
| gb:MT039890 | Organism:Severe | GTGCGTACTGCTGCAATATTGTTAACGTGAGTCTTGTA AAAACCTTCTTTTACGTTTACT | 26422 |
| gb:MN988713 | Organism:Severe | GTGCGTACTGCTGCAATATTGTTAACGTGAGTCTTGTA AAAACCTTCTTTTACGTTTACT | 26422 |
| gb:LC521925 | Organism:Severe | GTGCGTACTGCTGCAATATTGTTAACGTGAGTCTTGTA AAAACCTTCTTTTACGTTTACT | 26395 |
| gb:MT093571 | Organism:Severe | GTGCGTACTGCTGCAATATTGTTAACGTGAGTCTTGTA AAAACCTTCTTTTACGTTTACT | 26422 |
| gb:MT039887 | Organism:Severe | GTGCGTACTGCTGCAATATTGTTAACGTGAGTCTTGTA AAAACCTTCTTTTACGTTTACT | 26419 |
| gb:MT019530 | Organism:Severe | GTGCGTACTGCTGCAATATTGTTAACGTGAGTCTTGTA AAAACCTTCTTTTACGTTTACT | 26422 |
| gb:MT039888 | Organism:Severe | GTGCGTACTGCTGCAATATTGTTAACGTGAGTCTTGTA AAAACCTTCTTTTACGTTTACT | 26422 |
| gb:LC522972 | Organism:Severe | GTGCGTACTGCTGCAATATTGTTAACGTGAGTCTTGTA AAAACCTTCTTTTACGTTTACT | 26419 |
| gb:MT027063 | Organism:Severe | GTGCGTACTGCTGCAATATTGTTAACGTGAGTCTTGTA AAAACCTTCTTTTACGTTTACT | 26422 |
| gb:MT027062 | Organism:Severe | GTGCGTACTGCTGCAATATTGTTAACGTGAGTCTTGTA AAAACCTTCTTTTACGTTTACT | 26422 |
| gb:MT019529 | Organism:Severe | GTGCGTACTGCTGCAATATTGTTAACGTGAGTCTTGTA AAAACCTTCTTTTACGTTTACT | 26422 |
| gb:MN996529 | Organism:Severe | GTGCGTACTGCTGCAATATTGTTAACGTGAGTCTTGTA AAAACCTTCTTTTACGTTTACT | 26410 |
| gb:MN996531 | Organism:Severe | GTGCGTACTGCTGCAATATTGTTAACGTGAGTCTTGTA AAAACCTTCTTTTACGTTTACT | 26409 |
| gb:MT066176 | Organism:Severe | GTGCGTACTGCTGCAATATTGTTAACGTGAGTCTTGTA AAAACCTTCTTTTACGTTTACT | 26422 |
| gb:MT027064 | Organism:Severe | GTGCGTACTGCTGCAATATTGTTAACGTGAGTCTTGTA AAAACCTTCTTTTACGTTTACT | 26422 |
| gb:MN994468 | Organism:Severe | GTGCGTACTGCTGCAATATTGTTAACGTGAGTCTTGTA AAAACCTTCTTTTACGTTTACT | 26422 |
| gb:MT072688 | Organism:Severe | GTGCGTACTGCTGCAATATTGTTAACGTGAGTCTTGTA AAAACCTTCTTTTACGTTTACT | 26407 |
| gb:MN996527 | Organism:Severe | GTGCGTACTGCTGCAATATTGTTAACGTGAGTCTTGTA AAAACCTTCTTTTACGTTTACT | 26389 |

|             |                 |                                                             |       |
|-------------|-----------------|-------------------------------------------------------------|-------|
| gb:MT093631 | Organism:Severe | GTGCGTACTGCTGCAATATTGTTAACGTGAGTCTTGTA AACCTTCTTTTACGTTTACT | 26460 |
| gb:MT106053 | Organism:Severe | GTGCGTACTGCTGCAATATTGTTAACGTGAGTCTTGTA AACCTTCTTTTACGTTTACT | 26422 |
| gb:MT019533 | Organism:Severe | GTGCGTACTGCTGCAATATTGTTAACGTGAGTCTTGTA AACCTTCTTTTACGTTTACT | 26422 |
| gb:MT019531 | Organism:Severe | GTGCGTACTGCTGCAATATTGTTAACGTGAGTCTTGTA AACCTTCTTTTACGTTTACT | 26422 |
| gb:MN996528 | Organism:Severe | GTGCGTACTGCTGCAATATTGTTAACGTGAGTCTTGTA AACCTTCTTTTACGTTTACT | 26422 |
| gb:MN996530 | Organism:Severe | GTGCGTACTGCTGCAATATTGTTAACGTGAGTCTTGTA AACCTTCTTTTACGTTTACT | 26408 |
| gb:MN908947 | Organism:Severe | GTGCGTACTGCTGCAATATTGTTAACGTGAGTCTTGTA AACCTTCTTTTACGTTTACT | 26422 |
| gb:MT019532 | Organism:Severe | GTGCGTACTGCTGCAATATTGTTAACGTGAGTCTTGTA AACCTTCTTTTACGTTTACT | 26422 |

\*\*\*\*\*

|             |                 |                                                             |       |
|-------------|-----------------|-------------------------------------------------------------|-------|
| gb:MT020781 | Organism:Severe | CTCGTGTTAAAAATCTGAATTCCTTAGAGTTCCTGATCTTCTGGTCTAAACGAACTAAA | 26470 |
| gb:MT007544 | Organism:Severe | CTCGTGTTAAAAATCTGAATTCCTTAGAGTTCCTGATCTTCTGGTCTAAACGAACTAAA | 26482 |
| gb:MN994467 | Organism:Severe | CTCGTGTTAAAAATCTGAATTCCTTAGAGTTCCTGATCTTCTGGTCTAAACGAACTAAA | 26482 |
| gb:MT044257 | Organism:Severe | CTCGTGTTAAAAATCTGAATTCCTTAGAGTTCCTGATCTTCTGGTCTAAACGAACTAAA | 26482 |
| gb:MT106054 | Organism:Severe | CTCGTGTTAAAAATCTGAATTCCTTAGAGTTCCTGATCTTCTGGTCTAAACGAACTAAA | 26482 |
| gb:MT049951 | Organism:Severe | CTCGTGTTAAAAATCTGAATTCCTTAGAGTTCCTGATCTTCTGGTCTAAACGAACTAAA | 26482 |
| gb:MN975262 | Organism:Severe | CTCGTGTTAAAAATCTGAATTCCTTAGAGTTCCTGATCTTCTGGTCTAAACGAACTAAA | 26482 |
| gb:MT106052 | Organism:Severe | CTCGTGTTAAAAATCTGAATTCCTTAGAGTTCCTGATCTTCTGGTCTAAACGAACTAAA | 26482 |
| gb:LC522975 | Organism:Severe | CTCGTGTTAAAAATCTGAATTCCTTAGAGTTCCTGATCTTCTGGTCTAAACGAACTAAA | 26479 |
| gb:LC522973 | Organism:Severe | CTCGTGTTAAAAATCTGAATTCCTTAGAGTTCCTGATCTTCTGGTCTAAACGAACTAAA | 26479 |
| gb:LC522974 | Organism:Severe | CTCGTGTTAAAAATCTGAATTCCTTAGAGTTCCTGATCTTCTGGTCTAAACGAACTAAA | 26479 |
| gb:MN985325 | Organism:Severe | CTCGTGTTAAAAATCTGAATTCCTTAGAGTTCCTGATCTTCTGGTCTAAACGAACTAAA | 26482 |
| gb:MT020881 | Organism:Severe | CTCGTGTTAAAAATCTGAATTCCTTAGAGTTCCTGATCTTCTGGTCTAAACGAACTAAA | 26482 |
| gb:MT020880 | Organism:Severe | CTCGTGTTAAAAATCTGAATTCCTTAGAGTTCCTGATCTTCTGGTCTAAACGAACTAAA | 26482 |
| gb:MT066175 | Organism:Severe | CTCGTGTTAAAAATCTGAATTCCTTAGAGTTCCTGATCTTCTGGTCTAAACGAACTAAA | 26482 |
| gb:MN997409 | Organism:Severe | CTCGTGTTAAAAATCTGAATTCCTTAGAGTTCCTGATCTTCTGGTCTAAACGAACTAAA | 26482 |
| gb:MN938384 | Organism:Severe | CTCGTGTTAAAAATCTGAATTCCTTAGAGTTCCTGATCTTCTGGTCTAAACGAACTAAA | 26450 |
| gb:MT044258 | Organism:Severe | CTCGTGTTAAAAATCTGAATTCCTTAGAGTTCCTGATCTTCTGGTCTAAACGAACTAAA | 26458 |
| gb:MT039890 | Organism:Severe | CTCGTGTTAAAAATCTGAATTCCTTAGAGTTCCTGATCTTCTGGTCTAAACGAACTAAA | 26482 |
| gb:MN988713 | Organism:Severe | CTCGTGTTAAAAATCTGAATTCCTTAGAGTTCCTGATCTTCTGGTCTAAACGAACTAAA | 26482 |
| gb:LC521925 | Organism:Severe | CTCGTGTTAAAAATCTGAATTCCTTAGAGTTCCTGATCTTCTGGTCTAAACGAACTAAA | 26455 |
| gb:MT093571 | Organism:Severe | CTCGTGTTAAAAATCTGAATTCCTTAGAGTTCCTGATCTTCTGGTCTAAACGAACTAAA | 26482 |
| gb:MT039887 | Organism:Severe | CTCGTGTTAAAAATCTGAATTCCTTAGAGTTCCTGATCTTCTGGTCTAAACGAACTAAA | 26479 |
| gb:MT019530 | Organism:Severe | CTCGTGTTAAAAATCTGAATTCCTTAGAGTTCCTGATCTTCTGGTCTAAACGAACTAAA | 26482 |
| gb:MT039888 | Organism:Severe | CTCGTGTTAAAAATCTGAATTCCTTAGAGTTCCTGATCTTCTGGTCTAAACGAACTAAA | 26482 |
| gb:LC522972 | Organism:Severe | CTCGTGTTAAAAATCTGAATTCCTTAGAGTTCCTGATCTTCTGGTCTAAACGAACTAAA | 26479 |
| gb:MT027063 | Organism:Severe | CTCGTGTTAAAAATCTGAATTCCTTAGAGTTCCTGATCTTCTGGTCTAAACGAACTAAA | 26482 |
| gb:MT027062 | Organism:Severe | CTCGTGTTAAAAATCTGAATTCCTTAGAGTTCCTGATCTTCTGGTCTAAACGAACTAAA | 26482 |
| gb:MT019529 | Organism:Severe | CTCGTGTTAAAAATCTGAATTCCTTAGAGTTCCTGATCTTCTGGTCTAAACGAACTAAA | 26482 |
| gb:MN996529 | Organism:Severe | CTCGTGTTAAAAATCTGAATTCCTTAGAGTTCCTGATCTTCTGGTCTAAACGAACTAAA | 26470 |
| gb:MN996531 | Organism:Severe | CTCGTGTTAAAAATCTGAATTCCTTAGAGTTCCTGATCTTCTGGTCTAAACGAACTAAA | 26469 |
| gb:MT066176 | Organism:Severe | CTCGTGTTAAAAATCTGAATTCCTTAGAGTTCCTGATCTTCTGGTCTAAACGAACTAAA | 26482 |
| gb:MT027064 | Organism:Severe | CTCGTGTTAAAAATCTGAATTCCTTAGAGTTCCTGATCTTCTGGTCTAAACGAACTAAA | 26482 |
| gb:MN994468 | Organism:Severe | CTCGTGTTAAAAATCTGAATTCCTTAGAGTTCCTGATCTTCTGGTCTAAACGAACTAAA | 26482 |
| gb:MT072688 | Organism:Severe | CTCGTGTTAAAAATCTGAATTCCTTAGAGTTCCTGATCTTCTGGTCTAAACGAACTAAA | 26467 |
| gb:MN996527 | Organism:Severe | CTCGTGTTAAAAATCTGAATTCCTTAGAGTTCCTGATCTTCTGGTCTAAACGAACTAAA | 26449 |
| gb:MT093631 | Organism:Severe | CTCGTGTTAAAAATCTGAATTCCTTAGAGTTCCTGATCTTCTGGTCTAAACGAACTAAA | 26520 |
| gb:MT106053 | Organism:Severe | CTCGTGTTAAAAATCTGAATTCCTTAGAGTTCCTGATCTTCTGGTCTAAACGAACTAAA | 26482 |
| gb:MT019533 | Organism:Severe | CTCGTGTTAAAAATCTGAATTCCTTAGAGTTCCTGATCTTCTGGTCTAAACGAACTAAA | 26482 |
| gb:MT019531 | Organism:Severe | CTCGTGTTAAAAATCTGAATTCCTTAGAGTTCCTGATCTTCTGGTCTAAACGAACTAAA | 26482 |
| gb:MN996528 | Organism:Severe | CTCGTGTTAAAAATCTGAATTCCTTAGAGTTCCTGATCTTCTGGTCTAAACGAACTAAA | 26482 |
| gb:MN996530 | Organism:Severe | CTCGTGTTAAAAATCTGAATTCCTTAGAGTTCCTGATCTTCTGGTCTAAACGAACTAAA | 26468 |
| gb:MN908947 | Organism:Severe | CTCGTGTTAAAAATCTGAATTCCTTAGAGTTCCTGATCTTCTGGTCTAAACGAACTAAA | 26482 |
| gb:MT019532 | Organism:Severe | CTCGTGTTAAAAATCTGAATTCCTTAGAGTTCCTGATCTTCTGGTCTAAACGAACTAAA | 26482 |

\*\*\*\*\*

|             |                 |                                                              |       |
|-------------|-----------------|--------------------------------------------------------------|-------|
| gb:MT020781 | Organism:Severe | TATTATATTAGTTTTCTGTTTGGAACTTTAATTTTAGCCATGGCAGATTC AACCGGTAC | 26530 |
| gb:MT007544 | Organism:Severe | TATTATATTAGTTTTCTGTTTGGAACTTTAATTTTAGCCATGGCAGATTC AACCGGTAC | 26542 |
| gb:MN994467 | Organism:Severe | TATTATATTAGTTTTCTGTTTGGAACTTTAATTTTAGCCATGGCAGATTC AACCGGTAC | 26542 |
| gb:MT044257 | Organism:Severe | TATTATATTAGTTTTCTGTTTGGAACTTTAATTTTAGCCATGGCAGATTC AACCGGTAC | 26542 |
| gb:MT106054 | Organism:Severe | TATTATATTAGTTTTCTGTTTGGAACTTTAATTTTAGCCATGGCAGATTC AACCGGTAC | 26542 |
| gb:MT049951 | Organism:Severe | TATTATATTAGTTTTCTGTTTGGAACTTTAATTTTAGCCATGGCAGATTC AACCGGTAC | 26542 |
| gb:MN975262 | Organism:Severe | TATTATATTAGTTTTCTGTTTGGAACTTTAATTTTAGCCATGGCAGATTC AACCGGTAC | 26542 |
| gb:MT106052 | Organism:Severe | TATTATATTAGTTTTCTGTTTGGAACTTTAATTTTAGCCATGGCAGATTC AACCGGTAC | 26542 |
| gb:LC522975 | Organism:Severe | TATTATATTAGTTTTCTGTTTGGAACTTTAATTTTAGCCATGGCAGATTC AACCGGTAC | 26539 |

|             |                 |                                                             |       |
|-------------|-----------------|-------------------------------------------------------------|-------|
| gb:LC522973 | Organism:Severe | TATTATATTAGTTTTCTGTTTGGAACTTTAATTTTAGCCATGGCAGATTC AACGGTAC | 26539 |
| gb:LC522974 | Organism:Severe | TATTATATTAGTTTTCTGTTTGGAACTTTAATTTTAGCCATGGCAGATTC AACGGTAC | 26539 |
| gb:MN985325 | Organism:Severe | TATTATATTAGTTTTCTGTTTGGAACTTTAATTTTAGCCATGGCAGATTC AACGGTAC | 26542 |
| gb:MT020881 | Organism:Severe | TATTATATTAGTTTTCTGTTTGGAACTTTAATTTTAGCCATGGCAGATTC AACGGTAC | 26542 |
| gb:MT020880 | Organism:Severe | TATTATATTAGTTTTCTGTTTGGAACTTTAATTTTAGCCATGGCAGATTC AACGGTAC | 26542 |
| gb:MT066175 | Organism:Severe | TATTATATTAGTTTTCTGTTTGGAACTTTAATTTTAGCCATGGCAGATTC AACGGTAC | 26542 |
| gb:MN997409 | Organism:Severe | TATTATATTAGTTTTCTGTTTGGAACTTTAATTTTAGCCATGGCAGATTC AACGGTAC | 26542 |
| gb:MN938384 | Organism:Severe | TATTATATTAGTTTTCTGTTTGGAACTTTAATTTTAGCCATGGCAGATTC AACGGTAC | 26510 |
| gb:MT044258 | Organism:Severe | TATTATATTAGTTTTCTGTTTGGAACTTTAATTTTAGCCATGGCAGATTC AACGGTAC | 26518 |
| gb:MT039890 | Organism:Severe | TATTATATTAGTTTTCTGTTTGGAACTTTAATTTTAGCCATGGCAGATTC AACGGTAC | 26542 |
| gb:MN988713 | Organism:Severe | TATTATATTAGTTTTCTGTTTGGAACTTTAATTTTAGCCATGGCAGATTC AACGGTAC | 26542 |
| gb:LC521925 | Organism:Severe | TATTATATTAGTTTTCTGTTTGGAACTTTAATTTTAGCCATGGCAGATTC AACGGTAC | 26515 |
| gb:MT093571 | Organism:Severe | TATTATATTAGTTTTCTGTTTGGAACTTTAATTTTAGCCATGGCAGATTC AACGGTAC | 26542 |
| gb:MT039887 | Organism:Severe | TATTATATTAGTTTTCTGTTTGGAACTTTAATTTTAGCCATGGCAGATTC AACGGTAC | 26539 |
| gb:MT019530 | Organism:Severe | TATTATATTAGTTTTCTGTTTGGAACTTTAATTTTAGCCATGGCAGATTC AACGGTAC | 26542 |
| gb:MT039888 | Organism:Severe | TATTATATTAGTTTTCTGTTTGGAACTTTAATTTTAGCCATGGCAGATTC AACGGTAC | 26542 |
| gb:LC522972 | Organism:Severe | TATTATATTAGTTTTCTGTTTGGAACTTTAATTTTAGCCATGGCAGATTC AACGGTAC | 26539 |
| gb:MT027063 | Organism:Severe | TATTATATTAGTTTTCTGTTTGGAACTTTAATTTTAGCCATGGCAGATTC AACGGTAC | 26542 |
| gb:MT027062 | Organism:Severe | TATTATATTAGTTTTCTGTTTGGAACTTTAATTTTAGCCATGGCAGATTC AACGGTAC | 26542 |
| gb:MT019529 | Organism:Severe | TATTATATTAGTTTTCTGTTTGGAACTTTAATTTTAGCCATGGCAGATTC AACGGTAC | 26542 |
| gb:MN996529 | Organism:Severe | TATTATATTAGTTTTCTGTTTGGAACTTTAATTTTAGCCATGGCAGATTC AACGGTAC | 26530 |
| gb:MN996531 | Organism:Severe | TATTATATTAGTTTTCTGTTTGGAACTTTAATTTTAGCCATGGCAGATTC AACGGTAC | 26529 |
| gb:MT066176 | Organism:Severe | TATTATATTAGTTTTCTGTTTGGAACTTTAATTTTAGCCATGGCAGATTC AACGGTAC | 26542 |
| gb:MT027064 | Organism:Severe | TATTATATTAGTTTTCTGTTTGGAACTTTAATTTTAGCCATGGCAGATTC AACGGTAC | 26542 |
| gb:MN994468 | Organism:Severe | TATTATATTAGTTTTCTGTTTGGAACTTTAATTTTAGCCATGGCAGATTC AACGGTAC | 26542 |
| gb:MT072688 | Organism:Severe | TATTATATTAGTTTTCTGTTTGGAACTTTAATTTTAGCCATGGCAGATTC AACGGTAC | 26527 |
| gb:MN996527 | Organism:Severe | TATTATATTAGTTTTCTGTTTGGAACTTTAATTTTAGCCATGGCAGATTC AACGGTAC | 26509 |
| gb:MT093631 | Organism:Severe | TATTATATTAGTTTTCTGTTTGGAACTTTAATTTTAGCCATGGCAGATTC AACGGTAC | 26580 |
| gb:MT106053 | Organism:Severe | TATTATATTAGTTTTCTGTTTGGAACTTTAATTTTAGCCATGGCAGATTC AACGGTAC | 26542 |
| gb:MT019533 | Organism:Severe | TATTATATTAGTTTTCTGTTTGGAACTTTAATTTTAGCCATGGCAGATTC AACGGTAC | 26542 |
| gb:MT019531 | Organism:Severe | TATTATATTAGTTTTCTGTTTGGAACTTTAATTTTAGCCATGGCAGATTC AACGGTAC | 26542 |
| gb:MN996528 | Organism:Severe | TATTATATTAGTTTTCTGTTTGGAACTTTAATTTTAGCCATGGCAGATTC AACGGTAC | 26542 |
| gb:MN996530 | Organism:Severe | TATTATATTAGTTTTCTGTTTGGAACTTTAATTTTAGCCATGGCAGATTC AACGGTAC | 26528 |
| gb:MN908947 | Organism:Severe | TATTATATTAGTTTTCTGTTTGGAACTTTAATTTTAGCCATGGCAGATTC AACGGTAC | 26542 |
| gb:MT019532 | Organism:Severe | TATTATATTAGTTTTCTGTTTGGAACTTTAATTTTAGCCATGGCAGATTC AACGGTAC | 26542 |

\*\*\*\*\*

|             |                 |                                                              |       |
|-------------|-----------------|--------------------------------------------------------------|-------|
| gb:MT020781 | Organism:Severe | TATTACCGTTGAAGAGCTTAAAAAGCTCCTTGAACAATGGAACCTAGTAATAGGTTTCCT | 26590 |
| gb:MT007544 | Organism:Severe | TATTACCGTTGAAGAGCTTAAAAAGCTCCTTGAACAATGGAACCTAGTAATAGGTTTCCT | 26602 |
| gb:MN994467 | Organism:Severe | TATTACCGTTGAAGAGCTTAAAAAGCTCCTTGAACAATGGAACCTAGTAATAGGTTTCCT | 26602 |
| gb:MT044257 | Organism:Severe | TATTACCGTTGAAGAGCTTAAAAAGCTCCTTGAACAATGGAACCTAGTAATAGGTTTCCT | 26602 |
| gb:MT106054 | Organism:Severe | TATTACCGTTGAAGAGCTTAAAAAGCTCCTTGAACAATGGAACCTAGTAATAGGTTTCCT | 26602 |
| gb:MT049951 | Organism:Severe | TATTACCGTTGAAGAGCTTAAAAAGCTCCTTGAACAATGGAACCTAGTAATAGGTTTCCT | 26602 |
| gb:MN975262 | Organism:Severe | TATTACCGTTGAAGAGCTTAAAAAGCTCCTTGAACAATGGAACCTAGTAATAGGTTTCCT | 26602 |
| gb:MT106052 | Organism:Severe | TATTACCGTTGAAGAGCTTAAAAAGCTCCTTGAACAATGGAACCTAGTAATAGGTTTCCT | 26602 |
| gb:LC522975 | Organism:Severe | TATTACCGTTGAAGAGCTTAAAAAGCTCCTTGAACAATGGAACCTAGTAATAGGTTTCCT | 26599 |
| gb:LC522973 | Organism:Severe | TATTACCGTTGAAGAGCTTAAAAAGCTCCTTGAACAATGGAACCTAGTAATAGGTTTCCT | 26599 |
| gb:LC522974 | Organism:Severe | TATTACCGTTGAAGAGCTTAAAAAGCTCCTTGAACAATGGAACCTAGTAATAGGTTTCCT | 26599 |
| gb:MN985325 | Organism:Severe | TATTACCGTTGAAGAGCTTAAAAAGCTCCTTGAACAATGGAACCTAGTAATAGGTTTCCT | 26602 |
| gb:MT020881 | Organism:Severe | TATTACCGTTGAAGAGCTTAAAAAGCTCCTTGAACAATGGAACCTAGTAATAGGTTTCCT | 26602 |
| gb:MT020880 | Organism:Severe | TATTACCGTTGAAGAGCTTAAAAAGCTCCTTGAACAATGGAACCTAGTAATAGGTTTCCT | 26602 |
| gb:MT066175 | Organism:Severe | TATTACCGTTGAAGAGCTTAAAAAGCTCCTTGAACAATGGAACCTAGTAATAGGTTTCCT | 26602 |
| gb:MN997409 | Organism:Severe | TATTACCGTTGAAGAGCTTAAAAAGCTCCTTGAACAATGGAACCTAGTAATAGGTTTCCT | 26602 |
| gb:MN938384 | Organism:Severe | TATTACCGTTGAAGAGCTTAAAAAGCTCCTTGAACAATGGAACCTAGTAATAGGTTTCCT | 26570 |
| gb:MT044258 | Organism:Severe | TATTACCGTTGAAGAGCTTAAAAAGCTCCTTGAACAATGGAACCTAGTAATAGGTTTCCT | 26578 |
| gb:MT039890 | Organism:Severe | TATTACCGTTGAAGAGCTTAAAAAGCTCCTTGAACAATGGAACCTAGTAATAGGTTTCCT | 26602 |
| gb:MN988713 | Organism:Severe | TATTACCGTTGAAGAGCTTAAAAAGCTCCTTGAACAATGGAACCTAGTAATAGGTTTCCT | 26602 |
| gb:LC521925 | Organism:Severe | TATTACCGTTGAAGAGCTTAAAAAGCTCCTTGAACAATGGAACCTAGTAATAGGTTTCCT | 26575 |
| gb:MT093571 | Organism:Severe | TATTACCGTTGAAGAGCTTAAAAAGCTCCTTGAACAATGGAACCTAGTAATAGGTTTCCT | 26602 |
| gb:MT039887 | Organism:Severe | TATTACCGTTGAAGAGCTTAAAAAGCTCCTTGAACAATGGAACCTAGTAATAGGTTTCCT | 26599 |
| gb:MT019530 | Organism:Severe | TATTACCGTTGAAGAGCTTAAAAAGCTCCTTGAACAATGGAACCTAGTAATAGGTTTCCT | 26602 |
| gb:MT039888 | Organism:Severe | TATTACCGTTGAAGAGCTTAAAAAGCTCCTTGAACAATGGAACCTAGTAATAGGTTTCCT | 26602 |
| gb:LC522972 | Organism:Severe | TATTACCGTTGAAGAGCTTAAAAAGCTCCTTGAACAATGGAACCTAGTAATAGGTTTCCT | 26599 |
| gb:MT027063 | Organism:Severe | TATTACCGTTGAAGAGCTTAAAAAGCTCCTTGAACAATGGAACCTAGTAATAGGTTTCCT | 26602 |
| gb:MT027062 | Organism:Severe | TATTACCGTTGAAGAGCTTAAAAAGCTCCTTGAACAATGGAACCTAGTAATAGGTTTCCT | 26602 |

|             |                 |                                                             |       |
|-------------|-----------------|-------------------------------------------------------------|-------|
| gb:MT019529 | Organism:Severe | TATTACGTTGAAGAGCTTAAAAAGCTCCTTGAACAATGGAACCTAGTAATAGGTTTCCT | 26602 |
| gb:MN996529 | Organism:Severe | TATTACGTTGAAGAGCTTAAAAAGCTCCTTGAACAATGGAACCTAGTAATAGGTTTCCT | 26590 |
| gb:MN996531 | Organism:Severe | TATTACGTTGAAGAGCTTAAAAAGCTCCTTGAACAATGGAACCTAGTAATAGGTTTCCT | 26589 |
| gb:MT066176 | Organism:Severe | TATTACGTTGAAGAGCTTAAAAAGCTCCTTGAACAATGGAACCTAGTAATAGGTTTCCT | 26602 |
| gb:MT027064 | Organism:Severe | TATTACGTTGAAGAGCTTAAAAAGCTCCTTGAACAATGGAACCTAGTAATAGGTTTCCT | 26602 |
| gb:MN994468 | Organism:Severe | TATTACGTTGAAGAGCTTAAAAAGCTCCTTGAACAATGGAACCTAGTAATAGGTTTCCT | 26602 |
| gb:MT072688 | Organism:Severe | TATTACGTTGAAGAGCTTAAAAAGCTCCTTGAACAATGGAACCTAGTAATAGGTTTCCT | 26587 |
| gb:MN996527 | Organism:Severe | TATTACGTTGAAGAGCTTAAAAAGCTCCTTGAACAATGGAACCTAGTAATAGGTTTCCT | 26569 |
| gb:MT093631 | Organism:Severe | TATTACGTTGAAGAGCTTAAAAAGCTCCTTGAACAATGGAACCTAGTAATAGGTTTCCT | 26640 |
| gb:MT106053 | Organism:Severe | TATTACGTTGAAGAGCTTAAAAAGCTCCTTGAACAATGGAACCTAGTAATAGGTTTCCT | 26602 |
| gb:MT019533 | Organism:Severe | TATTACGTTGAAGAGCTTAAAAAGCTCCTTGAACAATGGAACCTAGTAATAGGTTTCCT | 26602 |
| gb:MT019531 | Organism:Severe | TATTACGTTGAAGAGCTTAAAAAGCTCCTTGAACAATGGAACCTAGTAATAGGTTTCCT | 26602 |
| gb:MN996528 | Organism:Severe | TATTACGTTGAAGAGCTTAAAAAGCTCCTTGAACAATGGAACCTAGTAATAGGTTTCCT | 26602 |
| gb:MN996530 | Organism:Severe | TATTACGTTGAAGAGCTTAAAAAGCTCCTTGAACAATGGAACCTAGTAATAGGTTTCCT | 26588 |
| gb:MN908947 | Organism:Severe | TATTACGTTGAAGAGCTTAAAAAGCTCCTTGAACAATGGAACCTAGTAATAGGTTTCCT | 26602 |
| gb:MT019532 | Organism:Severe | TATTACGTTGAAGAGCTTAAAAAGCTCCTTGAACAATGGAACCTAGTAATAGGTTTCCT | 26602 |

\*\*\*\*\*

|             |                 |                                                             |       |
|-------------|-----------------|-------------------------------------------------------------|-------|
| gb:MT020781 | Organism:Severe | ATTCCTTACATGGATTTGCTTCTACAATTTGCCTATGCCAACAGGAATAGGTTTTTGTA | 26650 |
| gb:MT007544 | Organism:Severe | ATTCCTTACATGGATTTGCTTCTACAATTTGCCTATGCCAACAGGAATAGGTTTTTGTA | 26662 |
| gb:MN994467 | Organism:Severe | ATTCCTTACATGGATTTGCTTCTACAATTTGCCTATGCCAACAGGAATAGGTTTTTGTA | 26662 |
| gb:MT044257 | Organism:Severe | ATTCCTTACATGGATTTGCTTCTACAATTTGCCTATGCCAACAGGAATAGGTTTTTGTA | 26662 |
| gb:MT106054 | Organism:Severe | ATTCCTTACATGGATTTGCTTCTACAATTTGCCTATGCCAACAGGAATAGGTTTTTGTA | 26662 |
| gb:MT049951 | Organism:Severe | ATTCCTTACATGGATTTGCTTCTACAATTTGCCTATGCCAACAGGAATAGGTTTTTGTA | 26662 |
| gb:MN975262 | Organism:Severe | ATTCCTTACATGGATTTGCTTCTACAATTTGCCTATGCCAACAGGAATAGGTTTTTGTA | 26662 |
| gb:MT106052 | Organism:Severe | ATTCCTTACATGGATTTGCTTCTACAATTTGCCTATGCCAACAGGAATAGGTTTTTGTA | 26662 |
| gb:LC522975 | Organism:Severe | ATTCCTTACATGGATTTGCTTCTACAATTTGCCTATGCCAACAGGAATAGGTTTTTGTA | 26659 |
| gb:LC522973 | Organism:Severe | ATTCCTTACATGGATTTGCTTCTACAATTTGCCTATGCCAACAGGAATAGGTTTTTGTA | 26659 |
| gb:LC522974 | Organism:Severe | ATTCCTTACATGGATTTGCTTCTACAATTTGCCTATGCCAACAGGAATAGGTTTTTGTA | 26659 |
| gb:MN985325 | Organism:Severe | ATTCCTTACATGGATTTGCTTCTACAATTTGCCTATGCCAACAGGAATAGGTTTTTGTA | 26662 |
| gb:MT020881 | Organism:Severe | ATTCCTTACATGGATTTGCTTCTACAATTTGCCTATGCCAACAGGAATAGGTTTTTGTA | 26662 |
| gb:MT020880 | Organism:Severe | ATTCCTTACATGGATTTGCTTCTACAATTTGCCTATGCCAACAGGAATAGGTTTTTGTA | 26662 |
| gb:MT066175 | Organism:Severe | ATTCCTTACATGGATTTGCTTCTACAATTTGCCTATGCCAACAGGAATAGGTTTTTGTA | 26662 |
| gb:MN997409 | Organism:Severe | ATTCCTTACATGGATTTGCTTCTACAATTTGCCTATGCCAACAGGAATAGGTTTTTGTA | 26662 |
| gb:MN938384 | Organism:Severe | ATTCCTTACATGGATTTGCTTCTACAATTTGCCTATGCCAACAGGAATAGGTTTTTGTA | 26630 |
| gb:MT044258 | Organism:Severe | ATTCCTTACATGGATTTGCTTCTACAATTTGCCTATGCCAACAGGAATAGGTTTTTGTA | 26638 |
| gb:MT039890 | Organism:Severe | ATTCCTTACATGGATTTGCTTCTACAATTTGCCTATGCCAACAGGAATAGGTTTTTGTA | 26662 |
| gb:MN988713 | Organism:Severe | ATTCCTTACATGGATTTGCTTCTACAATTTGCCTATGCCAACAGGAATAGGTTTTTGTA | 26662 |
| gb:LC521925 | Organism:Severe | ATTCCTTACATGGATTTGCTTCTACAATTTGCCTATGCCAACAGGAATAGGTTTTTGTA | 26635 |
| gb:MT093571 | Organism:Severe | ATTCCTTACATGGATTTGCTTCTACAATTTGCCTATGCCAACAGGAATAGGTTTTTGTA | 26662 |
| gb:MT039887 | Organism:Severe | ATTCCTTACATGGATTTGCTTCTACAATTTGCCTATGCCAACAGGAATAGGTTTTTGTA | 26659 |
| gb:MT019530 | Organism:Severe | ATTCCTTACATGGATTTGCTTCTACAATTTGCCTATGCCAACAGGAATAGGTTTTTGTA | 26662 |
| gb:MT039888 | Organism:Severe | ATTCCTTACATGGATTTGCTTCTACAATTTGCCTATGCCAACAGGAATAGGTTTTTGTA | 26662 |
| gb:LC522972 | Organism:Severe | ATTCCTTACATGGATTTGCTTCTACAATTTGCCTATGCCAACAGGAATAGGTTTTTGTA | 26659 |
| gb:MT027063 | Organism:Severe | ATTCCTTACATGGATTTGCTTCTACAATTTGCCTATGCCAACAGGAATAGGTTTTTGTA | 26662 |
| gb:MT027062 | Organism:Severe | ATTCCTTACATGGATTTGCTTCTACAATTTGCCTATGCCAACAGGAATAGGTTTTTGTA | 26662 |
| gb:MT019529 | Organism:Severe | ATTCCTTACATGGATTTGCTTCTACAATTTGCCTATGCCAACAGGAATAGGTTTTTGTA | 26662 |
| gb:MN996529 | Organism:Severe | ATTCCTTACATGGATTTGCTTCTACAATTTGCCTATGCCAACAGGAATAGGTTTTTGTA | 26650 |
| gb:MN996531 | Organism:Severe | ATTCCTTACATGGATTTGCTTCTACAATTTGCCTATGCCAACAGGAATAGGTTTTTGTA | 26649 |
| gb:MT066176 | Organism:Severe | ATTCCTTACATGGATTTGCTTCTACAATTTGCCTATGCCAACAGGAATAGGTTTTTGTA | 26662 |
| gb:MT027064 | Organism:Severe | ATTCCTTACATGGATTTGCTTCTACAATTTGCCTATGCCAACAGGAATAGGTTTTTGTA | 26662 |
| gb:MN994468 | Organism:Severe | ATTCCTTACATGGATTTGCTTCTACAATTTGCCTATGCCAACAGGAATAGGTTTTTGTA | 26662 |
| gb:MT072688 | Organism:Severe | ATTCCTTACATGGATTTGCTTCTACAATTTGCCTATGCCAACAGGAATAGGTTTTTGTA | 26647 |
| gb:MN996527 | Organism:Severe | ATTCCTTACATGGATTTGCTTCTACAATTTGCCTATGCCAACAGGAATAGGTTTTTGTA | 26629 |
| gb:MT093631 | Organism:Severe | ATTCCTTACATGGATTTGCTTCTACAATTTGCCTATGCCAACAGGAATAGGTTTTTGTA | 26700 |
| gb:MT106053 | Organism:Severe | ATTCCTTACATGGATTTGCTTCTACAATTTGCCTATGCCAACAGGAATAGGTTTTTGTA | 26662 |
| gb:MT019533 | Organism:Severe | ATTCCTTACATGGATTTGCTTCTACAATTTGCCTATGCCAACAGGAATAGGTTTTTGTA | 26662 |
| gb:MT019531 | Organism:Severe | ATTCCTTACATGGATTTGCTTCTACAATTTGCCTATGCCAACAGGAATAGGTTTTTGTA | 26662 |
| gb:MN996528 | Organism:Severe | ATTCCTTACATGGATTTGCTTCTACAATTTGCCTATGCCAACAGGAATAGGTTTTTGTA | 26662 |
| gb:MN996530 | Organism:Severe | ATTCCTTACATGGATTTGCTTCTACAATTTGCCTATGCCAACAGGAATAGGTTTTTGTA | 26648 |
| gb:MN908947 | Organism:Severe | ATTCCTTACATGGATTTGCTTCTACAATTTGCCTATGCCAACAGGAATAGGTTTTTGTA | 26662 |
| gb:MT019532 | Organism:Severe | ATTCCTTACATGGATTTGCTTCTACAATTTGCCTATGCCAACAGGAATAGGTTTTTGTA | 26662 |

\*\*\*\*\*

|             |                 |                                                              |       |
|-------------|-----------------|--------------------------------------------------------------|-------|
| gb:MT020781 | Organism:Severe | TATAATTAAGTTAATTTTCCTCTGGCTGTTATGGCCAGTAACCTTAGCTTGTTTTGTGCT | 26710 |
|-------------|-----------------|--------------------------------------------------------------|-------|

|             |                 |                                              |       |
|-------------|-----------------|----------------------------------------------|-------|
| gb:MT007544 | Organism:Severe | TATAATTAAGTTAATTTTCTCTGGCTGTTATGGCCAGTAACCTT | 26722 |
| gb:MN994467 | Organism:Severe | TATAATTAAGTTAATTTTCTCTGGCTGTTATGGCCAGTAACCTT | 26722 |
| gb:MT044257 | Organism:Severe | TATAATTAAGTTAATTTTCTCTGGCTGTTATGGCCAGTAACCTT | 26722 |
| gb:MT106054 | Organism:Severe | TATAATTAAGTTAATTTTCTCTGGCTGTTATGGCCAGTAACCTT | 26722 |
| gb:MT049951 | Organism:Severe | TATAATTAAGTTAATTTTCTCTGGCTGTTATGGCCAGTAACCTT | 26722 |
| gb:MN975262 | Organism:Severe | TATAATTAAGTTAATTTTCTCTGGCTGTTATGGCCAGTAACCTT | 26722 |
| gb:MT106052 | Organism:Severe | TATAATTAAGTTAATTTTCTCTGGCTGTTATGGCCAGTAACCTT | 26722 |
| gb:LC522975 | Organism:Severe | TATAATTAAGTTAATTTTCTCTGGCTGTTATGGCCAGTAACCTT | 26719 |
| gb:LC522973 | Organism:Severe | TATAATTAAGTTAATTTTCTCTGGCTGTTATGGCCAGTAACCTT | 26719 |
| gb:LC522974 | Organism:Severe | TATAATTAAGTTAATTTTCTCTGGCTGTTATGGCCAGTAACCTT | 26719 |
| gb:MN985325 | Organism:Severe | TATAATTAAGTTAATTTTCTCTGGCTGTTATGGCCAGTAACCTT | 26722 |
| gb:MT020881 | Organism:Severe | TATAATTAAGTTAATTTTCTCTGGCTGTTATGGCCAGTAACCTT | 26722 |
| gb:MT020880 | Organism:Severe | TATAATTAAGTTAATTTTCTCTGGCTGTTATGGCCAGTAACCTT | 26722 |
| gb:MT066175 | Organism:Severe | TATAATTAAGTTAATTTTCTCTGGCTGTTATGGCCAGTAACCTT | 26722 |
| gb:MN997409 | Organism:Severe | TATAATTAAGTTAATTTTCTCTGGCTGTTATGGCCAGTAACCTT | 26722 |
| gb:MN938384 | Organism:Severe | TATAATTAAGTTAATTTTCTCTGGCTGTTATGGCCAGTAACCTT | 26690 |
| gb:MT044258 | Organism:Severe | TATAATTAAGTTAATTTTCTCTGGCTGTTATGGCCAGTAACCTT | 26698 |
| gb:MT039890 | Organism:Severe | TATAATTAAGTTAATTTTCTCTGGCTGTTATGGCCAGTAACCTT | 26722 |
| gb:MN988713 | Organism:Severe | TATAATTAAGTTAATTTTCTCTGGCTGTTATGGCCAGTAACCTT | 26722 |
| gb:LC521925 | Organism:Severe | TATAATTAAGTTAATTTTCTCTGGCTGTTATGGCCAGTAACCTT | 26695 |
| gb:MT093571 | Organism:Severe | TATAATTAAGTTAATTTTCTCTGGCTGTTATGGCCAGTAACCTT | 26722 |
| gb:MT039887 | Organism:Severe | TATAATTAAGTTAATTTTCTCTGGCTGTTATGGCCAGTAACCTT | 26719 |
| gb:MT019530 | Organism:Severe | TATAATTAAGTTAATTTTCTCTGGCTGTTATGGCCAGTAACCTT | 26722 |
| gb:MT039888 | Organism:Severe | TATAATTAAGTTAATTTTCTCTGGCTGTTATGGCCAGTAACCTT | 26722 |
| gb:LC522972 | Organism:Severe | TATAATTAAGTTAATTTTCTCTGGCTGTTATGGCCAGTAACCTT | 26719 |
| gb:MT027063 | Organism:Severe | TATAATTAAGTTAATTTTCTCTGGCTGTTATGGCCAGTAACCTT | 26722 |
| gb:MT027062 | Organism:Severe | TATAATTAAGTTAATTTTCTCTGGCTGTTATGGCCAGTAACCTT | 26722 |
| gb:MT019529 | Organism:Severe | TATAATTAAGTTAATTTTCTCTGGCTGTTATGGCCAGTAACCTT | 26722 |
| gb:MN996529 | Organism:Severe | TATAATTAAGTTAATTTTCTCTGGCTGTTATGGCCAGTAACCTT | 26710 |
| gb:MN996531 | Organism:Severe | TATAATTAAGTTAATTTTCTCTGGCTGTTATGGCCAGTAACCTT | 26709 |
| gb:MT066176 | Organism:Severe | TATAATTAAGTTAATTTTCTCTGGCTGTTATGGCCAGTAACCTT | 26722 |
| gb:MT027064 | Organism:Severe | TATAATTAAGTTAATTTTCTCTGGCTGTTATGGCCAGTAACCTT | 26722 |
| gb:MN994468 | Organism:Severe | TATAATTAAGTTAATTTTCTCTGGCTGTTATGGCCAGTAACCTT | 26722 |
| gb:MT072688 | Organism:Severe | TATAATTAAGTTAATTTTCTCTGGCTGTTATGGCCAGTAACCTT | 26707 |
| gb:MN996527 | Organism:Severe | TATAATTAAGTTAATTTTCTCTGGCTGTTATGGCCAGTAACCTT | 26689 |
| gb:MT093631 | Organism:Severe | TATAATTAAGTTAATTTTCTCTGGCTGTTATGGCCAGTAACCTT | 26760 |
| gb:MT106053 | Organism:Severe | TATAATTAAGTTAATTTTCTCTGGCTGTTATGGCCAGTAACCTT | 26722 |
| gb:MT019533 | Organism:Severe | TATAATTAAGTTAATTTTCTCTGGCTGTTATGGCCAGTAACCTT | 26722 |
| gb:MT019531 | Organism:Severe | TATAATTAAGTTAATTTTCTCTGGCTGTTATGGCCAGTAACCTT | 26722 |
| gb:MN996528 | Organism:Severe | TATAATTAAGTTAATTTTCTCTGGCTGTTATGGCCAGTAACCTT | 26722 |
| gb:MN996530 | Organism:Severe | TATAATTAAGTTAATTTTCTCTGGCTGTTATGGCCAGTAACCTT | 26708 |
| gb:MN908947 | Organism:Severe | TATAATTAAGTTAATTTTCTCTGGCTGTTATGGCCAGTAACCTT | 26722 |
| gb:MT019532 | Organism:Severe | TATAATTAAGTTAATTTTCTCTGGCTGTTATGGCCAGTAACCTT | 26722 |

\*\*\*\*\*

|             |                 |                                                            |       |
|-------------|-----------------|------------------------------------------------------------|-------|
| gb:MT020781 | Organism:Severe | TGCTGCTGTTTACAGAATAAATTGGATCACCGTGGAATTGCTATCGCAATGGCTTGCT | 26770 |
| gb:MT007544 | Organism:Severe | TGCTGCTGTTTACAGAATAAATTGGATCACCGTGGAATTGCTATCGCAATGGCTTGCT | 26782 |
| gb:MN994467 | Organism:Severe | TGCTGCCGTTTACAGAATAAATTGGATCACCGTGGAATTGCTATCGCAATGGCTTGCT | 26782 |
| gb:MT044257 | Organism:Severe | TGCTGCCGTTTACAGAATAAATTGGATCACCGTGGAATTGCTATCGCAATGGCTTGCT | 26782 |
| gb:MT106054 | Organism:Severe | TGCTGCTGTTTACAGAATAAATTGGATCACCGTGGAATTGCTATCGCAATGGCTTGCT | 26782 |
| gb:MT049951 | Organism:Severe | TGCTGCTGTTTACAGAATAAATTGGATCACCGTGGAATTGCTATCGCAATGGCTTGCT | 26782 |
| gb:MN975262 | Organism:Severe | TGCTGCTGTTTACAGAATAAATTGGATCACCGTGGAATTGCTATCGCAATGGCTTGCT | 26782 |
| gb:MT106052 | Organism:Severe | TGCTGCTGTTTACAGAATAAATTGGATCACCGTGGAATTGCTATCGCAATGGCTTGCT | 26782 |
| gb:LC522975 | Organism:Severe | TGCTGCTGTTTACAGAATAAATTGGATCACCGTGGAATTGCTATCGCAATGGCTTGCT | 26779 |
| gb:LC522973 | Organism:Severe | TGCTGCTGTTTACAGAATAAATTGGATCACCGTGGAATTGCTATCGCAATGGCTTGCT | 26779 |
| gb:LC522974 | Organism:Severe | TGCTGCTGTTTACAGAATAAATTGGATCACCGTGGAATTGCTATCGCAATGGCTTGCT | 26779 |
| gb:MN985325 | Organism:Severe | TGCTGCTGTTTACAGAATAAATTGGATCACCGTGGAATTGCTATCGCAATGGCTTGCT | 26782 |
| gb:MT020881 | Organism:Severe | TGCTGCTGTTTACAGAATAAATTGGATCACCGTGGAATTGCTATCGCAATGGCTTGCT | 26782 |
| gb:MT020880 | Organism:Severe | TGCTGCTGTTTACAGAATAAATTGGATCACCGTGGAATTGCTATCGCAATGGCTTGCT | 26782 |
| gb:MT066175 | Organism:Severe | TGCTGCTGTTTACAGAATAAATTGGATCACCGTGGAATTGCTATCGCAATGGCTTGCT | 26782 |
| gb:MN997409 | Organism:Severe | TGCTGCTGTTTACAGAATAAATTGGATCACCGTGGAATTGCTATCGCAATGGCTTGCT | 26782 |
| gb:MN938384 | Organism:Severe | TGCTGCTGTTTACAGAATAAATTGGATCACCGTGGAATTGCTATCGCAATGGCTTGCT | 26750 |
| gb:MT044258 | Organism:Severe | TGCTGCTGTTTACAGAATAAATTGGATCACCGTGGAATTGCTATCGCAATGGCTTGCT | 26758 |
| gb:MT039890 | Organism:Severe | TGCTGCTGTTTACAGAATAAATTGGATCACCGTGGAATTGCTATCGCAATGGCTTGCT | 26782 |
| gb:MN988713 | Organism:Severe | TGCTGCTGTTTACAGAATAAATTGGATCACCGTGGAATTGCTATCGCAATGGCTTGCT | 26782 |

|             |                 |                                                              |       |
|-------------|-----------------|--------------------------------------------------------------|-------|
| gb:LC521925 | Organism:Severe | TGCTGCTGTTTACAGAATAAATTGGATCACCGGTGGAATTGCTATCGCAATGGCTTGTCT | 26755 |
| gb:MT093571 | Organism:Severe | TGCTGCTGTTTACAGAATAAATTGGATCACCGGTGGAATTGCTATCGCAATGGCTTGTCT | 26782 |
| gb:MT039887 | Organism:Severe | TGCTGCTGTTTACAGAATAAATTGGATCACCGGTGGAATTGCTATCGCAATGGCTTGTCT | 26779 |
| gb:MT019530 | Organism:Severe | TGCTGCTGTTTACAGAATAAATTGGATCACCGGTGGAATTGCTATCGCAATGGCTTGTCT | 26782 |
| gb:MT039888 | Organism:Severe | TGCTGCTGTTTACAGAATAAATTGGATCACCGGTGGAATTGCTATCGCAATGGCTTGTCT | 26782 |
| gb:LC522972 | Organism:Severe | TGCTGCTGTTTACAGAATAAATTGGATCACCGGTGGAATTGCTATCGCAATGGCTTGTCT | 26779 |
| gb:MT027063 | Organism:Severe | TGCTGCTGTTTACAGAATAAATTGGATCACCGGTGGAATTGCTATCGCAATGGCTTGTCT | 26782 |
| gb:MT027062 | Organism:Severe | TGCTGCTGTTTACAGAATAAATTGGATCACCGGTGGAATTGCTATCGCAATGGCTTGTCT | 26782 |
| gb:MT019529 | Organism:Severe | TGCTGCTGTTTACAGAATAAATTGGATCACCGGTGGAATTGCTATCGCAATGGCTTGTCT | 26782 |
| gb:MN996529 | Organism:Severe | TGCTGCTGTTTACAGAATAAATTGGATCACCGGTGGAATTGCTATCGCAATGGCTTGTCT | 26770 |
| gb:MN996531 | Organism:Severe | TGCTGCTGTTTACAGAATAAATTGGATCACCGGTGGAATTGCTATCGCAATGGCTTGTCT | 26769 |
| gb:MT066176 | Organism:Severe | TGCTGCTGTTTACAGAATAAATTGGATCACCGGTGGAATTGCTATCGCAATGGCTTGTCT | 26782 |
| gb:MT027064 | Organism:Severe | TGCTGCTGTTTACAGAATAAATTGGATCACCGGTGGAATTGCTATCGCAATGGCTTGTCT | 26782 |
| gb:MN994468 | Organism:Severe | TGCTGCTGTTTACAGAATAAATTGGATCACCGGTGGAATTGCTATCGCAATGGCTTGTCT | 26782 |
| gb:MT072688 | Organism:Severe | TGCTGCTGTTTACAGAATAAATTGGATCACCGGTGGAATTGCTATCGCAATGGCTTGTCT | 26767 |
| gb:MN996527 | Organism:Severe | TGCTGCTGTTTACAGAATAAATTGGATCACCGGTGGAATTGCTATCGCAATGGCTTGTCT | 26749 |
| gb:MT093631 | Organism:Severe | TGCTGCTGTTTACAGAATAAATTGGATCACCGGTGGAATTGCTATCGCAATGGCTTGTCT | 26820 |
| gb:MT106053 | Organism:Severe | TGCTGCTGTTTACAGAATAAATTGGATCACCGGTGGAATTGCTATCGCAATGGCTTGTCT | 26782 |
| gb:MT019533 | Organism:Severe | TGCTGCTGTTTACAGAATAAATTGGATCACCGGTGGAATTGCTATCGCAATGGCTTGTCT | 26782 |
| gb:MT019531 | Organism:Severe | TGCTGCTGTTTACAGAATAAATTGGATCACCGGTGGAATTGCTATCGCAATGGCTTGTCT | 26782 |
| gb:MN996528 | Organism:Severe | TGCTGCTGTTTACAGAATAAATTGGATCACCGGTGGAATTGCTATCGCAATGGCTTGTCT | 26782 |
| gb:MN996530 | Organism:Severe | TGCTGCTGTTTACAGAATAAATTGGATCACCGGTGGAATTGCTATCGCAATGGCTTGTCT | 26768 |
| gb:MN908947 | Organism:Severe | TGCTGCTGTTTACAGAATAAATTGGATCACCGGTGGAATTGCTATCGCAATGGCTTGTCT | 26782 |
| gb:MT019532 | Organism:Severe | TGCTGCTGTTTACAGAATAAATTGGATCACCGGTGGAATTGCTATCGCAATGGCTTGTCT | 26782 |

\*\*\*\*\*

|             |                 |                                                             |       |
|-------------|-----------------|-------------------------------------------------------------|-------|
| gb:MT020781 | Organism:Severe | TGTAGGCTTGATGTGGCTCAGCTACTTCATTGCTTCTTTCAGACTGTTTGCGGTACGCG | 26830 |
| gb:MT007544 | Organism:Severe | TGTAGGCTTGATGTGGCTCAGCTACTTCATTGCTTCTTTCAGACTGTTTGCGGTACGCG | 26842 |
| gb:MN994467 | Organism:Severe | TGTAGGCTTGATGTGGCTCAGCTACTTCATTGCTTCTTTCAGACTGTTTGCGGTACGCG | 26842 |
| gb:MT044257 | Organism:Severe | TGTAGGCTTGATGTGGCTCAGCTACTTCATTGCTTCTTTCAGACTGTTTGCGGTACGCG | 26842 |
| gb:MT106054 | Organism:Severe | TGTAGGCTTGATGTGGCTCAGCTACTTCATTGCTTCTTTCAGACTGTTTGCGGTACGCG | 26842 |
| gb:MT049951 | Organism:Severe | TGTAGGCTTGATGTGGCTCAGCTACTTCATTGCTTCTTTCAGACTGTTTGCGGTACGCG | 26842 |
| gb:MN975262 | Organism:Severe | TGTAGGCTTGATGTGGCTCAGCTACTTCATTGCTTCTTTCAGACTGTTTGCGGTACGCG | 26842 |
| gb:MT106052 | Organism:Severe | TGTAGGCTTGATGTGGCTCAGCTACTTCATTGCTTCTTTCAGACTGTTTGCGGTACGCG | 26842 |
| gb:LC522975 | Organism:Severe | TGTAGGCTTGATGTGGCTCAGCTACTTCATTGCTTCTTTCAGACTGTTTGCGGTACGCG | 26839 |
| gb:LC522973 | Organism:Severe | TGTAGGCTTGATGTGGCTCAGCTACTTCATTGCTTCTTTCAGACTGTTTGCGGTACGCG | 26839 |
| gb:LC522974 | Organism:Severe | TGTAGGCTTGATGTGGCTCAGCTACTTCATTGCTTCTTTCAGACTGTTTGCGGTACGCG | 26839 |
| gb:MN985325 | Organism:Severe | TGTAGGCTTGATGTGGCTCAGCTACTTCATTGCTTCTTTCAGACTGTTTGCGGTACGCG | 26842 |
| gb:MT020881 | Organism:Severe | TGTAGGCTTGATGTGGCTCAGCTACTTCATTGCTTCTTTCAGACTGTTTGCGGTACGCG | 26842 |
| gb:MT020880 | Organism:Severe | TGTAGGCTTGATGTGGCTCAGCTACTTCATTGCTTCTTTCAGACTGTTTGCGGTACGCG | 26842 |
| gb:MT066175 | Organism:Severe | TGTAGGCTTGATGTGGCTCAGCTACTTCATTGCTTCTTTCAGACTGTTTGCGGTACGCG | 26842 |
| gb:MN997409 | Organism:Severe | TGTAGGCTTGATGTGGCTCAGCTACTTCATTGCTTCTTTCAGACTGTTTGCGGTACGCG | 26842 |
| gb:MN938384 | Organism:Severe | TGTAGGCTTGATGTGGCTCAGCTACTTCATTGCTTCTTTCAGACTGTTTGCGGTACGCG | 26810 |
| gb:MT044258 | Organism:Severe | TGTAGGCTTGATGTGGCTCAGCTACTTCATTGCTTCTTTCAGACTGTTTGCGGTACGCG | 26818 |
| gb:MT039890 | Organism:Severe | TGTAGGCTTGATGTGGCTCAGCTACTTCATTGCTTCTTTCAGACTGTTTGCGGTACGCG | 26842 |
| gb:MN988713 | Organism:Severe | TGTAGGCTTGATGTGGCTCAGCTACTTCATTGCTTCTTTCAGACTGTTTGCGGTACGCG | 26842 |
| gb:LC521925 | Organism:Severe | TGTAGGCTTGATGTGGCTCAGCTACTTCATTGCTTCTTTCAGACTGTTTGCGGTACGCG | 26815 |
| gb:MT093571 | Organism:Severe | TGTAGGCTTGATGTGGCTCAGCTACTTCATTGCTTCTTTCAGACTGTTTGCGGTACGCG | 26842 |
| gb:MT039887 | Organism:Severe | TGTAGGCTTGATGTGGCTCAGCTACTTCATTGCTTCTTTCAGACTGTTTGCGGTACGCG | 26839 |
| gb:MT019530 | Organism:Severe | TGTAGGCTTGATGTGGCTCAGCTACTTCATTGCTTCTTTCAGACTGTTTGCGGTACGCG | 26842 |
| gb:MT039888 | Organism:Severe | TGTAGGCTTGATGTGGCTCAGCTACTTCATTGCTTCTTTCAGACTGTTTGCGGTACGCG | 26842 |
| gb:LC522972 | Organism:Severe | TGTAGGCTTGATGTGGCTCAGCTACTTCATTGCTTCTTTCAGACTGTTTGCGGTACGCG | 26839 |
| gb:MT027063 | Organism:Severe | TGTAGGCTTGATGTGGCTCAGCTACTTCATTGCTTCTTTCAGACTGTTTGCGGTACGCG | 26842 |
| gb:MT027062 | Organism:Severe | TGTAGGCTTGATGTGGCTCAGCTACTTCATTGCTTCTTTCAGACTGTTTGCGGTACGCG | 26842 |
| gb:MT019529 | Organism:Severe | TGTAGGCTTGATGTGGCTCAGCTACTTCATTGCTTCTTTCAGACTGTTTGCGGTACGCG | 26842 |
| gb:MN996529 | Organism:Severe | TGTAGGCTTGATGTGGCTCAGCTACTTCATTGCTTCTTTCAGACTGTTTGCGGTACGCG | 26830 |
| gb:MN996531 | Organism:Severe | TGTAGGCTTGATGTGGCTCAGCTACTTCATTGCTTCTTTCAGACTGTTTGCGGTACGCG | 26829 |
| gb:MT066176 | Organism:Severe | TGTAGGCTTGATGTGGCTCAGCTACTTCATTGCTTCTTTCAGACTGTTTGCGGTACGCG | 26842 |
| gb:MT027064 | Organism:Severe | TGTAGGCTTGATGTGGCTCAGCTACTTCATTGCTTCTTTCAGACTGTTTGCGGTACGCG | 26842 |
| gb:MN994468 | Organism:Severe | TGTAGGCTTGATGTGGCTCAGCTACTTCATTGCTTCTTTCAGACTGTTTGCGGTACGCG | 26842 |
| gb:MT072688 | Organism:Severe | TGTAGGCTTGATGTGGCTCAGCTACTTCATTGCTTCTTTCAGACTGTTTGCGGTACGCG | 26827 |
| gb:MN996527 | Organism:Severe | TGTAGGCTTGATGTGGCTCAGCTACTTCATTGCTTCTTTCAGACTGTTTGCGGTACGCG | 26809 |
| gb:MT093631 | Organism:Severe | TGTAGGCTTGATGTGGCTCAGCTACTTCATTGCTTCTTTCAGACTGTTTGCGGTACGCG | 26880 |
| gb:MT106053 | Organism:Severe | TGTAGGCTTGATGTGGCTCAGCTACTTCATTGCTTCTTTCAGACTGTTTGCGGTACGCG | 26842 |
| gb:MT019533 | Organism:Severe | TGTAGGCTTGATGTGGCTCAGCTACTTCATTGCTTCTTTCAGACTGTTTGCGGTACGCG | 26842 |

|             |                 |                                                             |       |
|-------------|-----------------|-------------------------------------------------------------|-------|
| gb:MT019531 | Organism:Severe | TGTAGGCTTGATGTGGCTCAGCTACTTCATTGCTTCTTTAGACTGTTTGCGCGTACGCG | 26842 |
| gb:MN996528 | Organism:Severe | TGTAGGCTTGATGTGGCTCAGCTACTTCATTGCTTCTTTAGACTGTTTGCGCGTACGCG | 26842 |
| gb:MN996530 | Organism:Severe | TGTAGGCTTGATGTGGCTCAGCTACTTCATTGCTTCTTTAGACTGTTTGCGCGTACGCG | 26828 |
| gb:MN908947 | Organism:Severe | TGTAGGCTTGATGTGGCTCAGCTACTTCATTGCTTCTTTAGACTGTTTGCGCGTACGCG | 26842 |
| gb:MT019532 | Organism:Severe | TGTAGGCTTGATGTGGCTCAGCTACTTCATTGCTTCTTTAGACTGTTTGCGCGTACGCG | 26842 |

\*\*\*\*\*

|             |                 |                                                             |       |
|-------------|-----------------|-------------------------------------------------------------|-------|
| gb:MT020781 | Organism:Severe | TTCCATGTGGTCATTCAATCCAGAACTAACATTCTTCTCAACGTGCCACTCCATGGCAC | 26890 |
| gb:MT007544 | Organism:Severe | TTCCATGTGGTCATTCAATCCAGAACTAACATTCTTCTCAACGTGCCACTCCATGGCAC | 26902 |
| gb:MN994467 | Organism:Severe | TTCCATGTGGTCATTCAATCCAGAACTAACATTCTTCTCAACGTGCCACTCCATGGCAC | 26902 |
| gb:MT044257 | Organism:Severe | TTCCATGTGGTCATTCAATCCAGAACTAACATTCTTCTCAACGTGCCACTCCATGGCAC | 26902 |
| gb:MT106054 | Organism:Severe | TTCCATGTGGTCATTCAATCCAGAACTAACATTCTTCTCAACGTGCCACTCCATGGCAC | 26902 |
| gb:MT049951 | Organism:Severe | TTCCATGTGGTCATTCAATCCAGAACTAACATTCTTCTCAACGTGCCACTCCATGGCAC | 26902 |
| gb:MN975262 | Organism:Severe | TTCCATGTGGTCATTCAATCCAGAACTAACATTCTTCTCAACGTGCCACTCCATGGCAC | 26902 |
| gb:MT106052 | Organism:Severe | TTCCATGTGGTCATTCAATCCAGAACTAACATTCTTCTCAACGTGCCACTCCATGGCAC | 26902 |
| gb:LC522975 | Organism:Severe | TTCCATGTGGTCATTCAATCCAGAACTAACATTCTTCTCAACGTGCCACTCCATGGCAC | 26899 |
| gb:LC522973 | Organism:Severe | TTCCATGTGGTCATTCAATCCAGAACTAACATTCTTCTCAACGTGCCACTCCATGGCAC | 26899 |
| gb:LC522974 | Organism:Severe | TTCCATGTGGTCATTCAATCCAGAACTAACATTCTTCTCAACGTGCCACTCCATGGCAC | 26899 |
| gb:MN985325 | Organism:Severe | TTCCATGTGGTCATTCAATCCAGAACTAACATTCTTCTCAACGTGCCACTCCATGGCAC | 26902 |
| gb:MT020881 | Organism:Severe | TTCCATGTGGTCATTCAATCCAGAACTAACATTCTTCTCAACGTGCCACTCCATGGCAC | 26902 |
| gb:MT020880 | Organism:Severe | TTCCATGTGGTCATTCAATCCAGAACTAACATTCTTCTCAACGTGCCACTCCATGGCAC | 26902 |
| gb:MT066175 | Organism:Severe | TTCCATGTGGTCATTCAATCCAGAACTAACATTCTTCTCAACGTGCCACTCCATGGCAC | 26902 |
| gb:MN997409 | Organism:Severe | TTCCATGTGGTCATTCAATCCAGAACTAACATTCTTCTCAACGTGCCACTCCATGGCAC | 26902 |
| gb:MN938384 | Organism:Severe | TTCCATGTGGTCATTCAATCCAGAACTAACATTCTTCTCAACGTGCCACTCCATGGCAC | 26870 |
| gb:MT044258 | Organism:Severe | TTCCATGTGGTCATTCAATCCAGAACTAACATTCTTCTCAACGTGCCACTCCATGGCAC | 26878 |
| gb:MT039890 | Organism:Severe | TTCCATGTGGTCATTCAATCCAGAACTAACATTCTTCTCAACGTGCCACTCCATGGCAC | 26902 |
| gb:MN988713 | Organism:Severe | TTCCATGTGGTCATTCAATCCAGAACTAACATTCTTCTCAACGTGCCACTCCATGGCAC | 26902 |
| gb:LC521925 | Organism:Severe | TTCCATGTGGTCATTCAATCCAGAACTAACATTCTTCTCAACGTGCCACTCCATGGCAC | 26875 |
| gb:MT093571 | Organism:Severe | TTCCATGTGGTCATTCAATCCAGAACTAACATTCTTCTCAACGTGCCACTCCATGGCAC | 26902 |
| gb:MT039887 | Organism:Severe | TTCCATGTGGTCATTCAATCCAGAACTAACATTCTTCTCAACGTGCCACTCCATGGCAC | 26899 |
| gb:MT019530 | Organism:Severe | TTCCATGTGGTCATTCAATCCAGAACTAACATTCTTCTCAACGTGCCACTCCATGGCAC | 26902 |
| gb:MT039888 | Organism:Severe | TTCCATGTGGTCATTCAATCCAGAACTAACATTCTTCTCAACGTGCCACTCCATGGCAC | 26902 |
| gb:LC522972 | Organism:Severe | TTCCATGTGGTCATTCAATCCAGAACTAACATTCTTCTCAACGTGCCACTCCATGGCAC | 26899 |
| gb:MT027063 | Organism:Severe | TTCCATGTGGTCATTCAATCCAGAACTAACATTCTTCTCAACGTGCCACTCCATGGCAC | 26902 |
| gb:MT027062 | Organism:Severe | TTCCATGTGGTCATTCAATCCAGAACTAACATTCTTCTCAACGTGCCACTCCATGGCAC | 26902 |
| gb:MT019529 | Organism:Severe | TTCCATGTGGTCATTCAATCCAGAACTAACATTCTTCTCAACGTGCCACTCCATGGCAC | 26902 |
| gb:MN996529 | Organism:Severe | TTCCATGTGGTCATTCAATCCAGAACTAACATTCTTCTCAACGTGCCACTCCATGGCAC | 26890 |
| gb:MN996531 | Organism:Severe | TTCCATGTGGTCATTCAATCCAGAACTAACATTCTTCTCAACGTGCCACTCCATGGCAC | 26889 |
| gb:MT066176 | Organism:Severe | TTCCATGTGGTCATTCAATCCAGAACTAACATTCTTCTCAACGTGCCACTCCATGGCAC | 26902 |
| gb:MT027064 | Organism:Severe | TTCCATGTGGTCATTCAATCCAGAACTAACATTCTTCTCAACGTGCCACTCCATGGCAC | 26902 |
| gb:MN994468 | Organism:Severe | TTCCATGTGGTCATTCAATCCAGAACTAACATTCTTCTCAACGTGCCACTCCATGGCAC | 26902 |
| gb:MT072688 | Organism:Severe | TTCCATGTGGTCATTCAATCCAGAACTAACATTCTTCTCAACGTGCCACTCCATGGCAC | 26887 |
| gb:MN996527 | Organism:Severe | TTCCATGTGGTCATTCAATCCAGAACTAACATTCTTCTCAACGTGCCACTCCATGGCAC | 26869 |
| gb:MT093631 | Organism:Severe | TTCCATGTGGTCATTCAATCCAGAACTAACATTCTTCTCAACGTGCCACTCCATGGCAC | 26940 |
| gb:MT106053 | Organism:Severe | TTCCATGTGGTCATTCAATCCAGAACTAACATTCTTCTCAACGTGCCACTCCATGGCAC | 26902 |
| gb:MT019533 | Organism:Severe | TTCCATGTGGTCATTCAATCCAGAACTAACATTCTTCTCAACGTGCCACTCCATGGCAC | 26902 |
| gb:MT019531 | Organism:Severe | TTCCATGTGGTCATTCAATCCAGAACTAACATTCTTCTCAACGTGCCACTCCATGGCAC | 26902 |
| gb:MN996528 | Organism:Severe | TTCCATGTGGTCATTCAATCCAGAACTAACATTCTTCTCAACGTGCCACTCCATGGCAC | 26902 |
| gb:MN996530 | Organism:Severe | TTCCATGTGGTCATTCAATCCAGAACTAACATTCTTCTCAACGTGCCACTCCATGGCAC | 26888 |
| gb:MN908947 | Organism:Severe | TTCCATGTGGTCATTCAATCCAGAACTAACATTCTTCTCAACGTGCCACTCCATGGCAC | 26902 |
| gb:MT019532 | Organism:Severe | TTCCATGTGGTCATTCAATCCAGAACTAACATTCTTCTCAACGTGCCACTCCATGGCAC | 26902 |

\*\*\*\*\*

|             |                 |                                                            |       |
|-------------|-----------------|------------------------------------------------------------|-------|
| gb:MT020781 | Organism:Severe | TATTCTGACCAGACCGTCTAGAAAGTGAACTCGTAATCGGAGCTGTGATCCTTCGTGG | 26950 |
| gb:MT007544 | Organism:Severe | TATTCTGACCAGACCGTCTAGAAAGTGAACTCGTAATCGGAGCTGTGATCCTTCGTGG | 26962 |
| gb:MN994467 | Organism:Severe | TATTCTGACCAGACCGTCTAGAAAGTGAACTCGTAATCGGAGCTGTGATCCTTCGTGG | 26962 |
| gb:MT044257 | Organism:Severe | TATTCTGACCAGACCGTCTAGAAAGTGAACTCGTAATCGGAGCTGTGATCCTTCGTGG | 26962 |
| gb:MT106054 | Organism:Severe | TATTCTGACCAGACCGTCTAGAAAGTGAACTCGTAATCGGAGCTGTGATCCTTCGTGG | 26962 |
| gb:MT049951 | Organism:Severe | TATTCTGACCAGACCGTCTAGAAAGTGAACTCGTAATCGGAGCTGTGATCCTTCGTGG | 26962 |
| gb:MN975262 | Organism:Severe | TATTCTGACCAGACCGTCTAGAAAGTGAACTCGTAATCGGAGCTGTGATCCTTCGTGG | 26962 |
| gb:MT106052 | Organism:Severe | TATTCTGACCAGACCGTCTAGAAAGTGAACTCGTAATCGGAGCTGTGATCCTTCGTGG | 26962 |
| gb:LC522975 | Organism:Severe | TATTCTGACCAGACCGTCTAGAAAGTGAACTCGTAATCGGAGCTGTGATCCTTCGTGG | 26959 |
| gb:LC522973 | Organism:Severe | TATTCTGACCAGACCGTCTAGAAAGTGAACTCGTAATCGGAGCTGTGATCCTTCGTGG | 26959 |
| gb:LC522974 | Organism:Severe | TATTCTGACCAGACCGTCTAGAAAGTGAACTCGTAATCGGAGCTGTGATCCTTCGTGG | 26959 |
| gb:MN985325 | Organism:Severe | TATTCTGACCAGACCGTCTAGAAAGTGAACTCGTAATCGGAGCTGTGATCCTTCGTGG | 26962 |

|             |                 |                                  |       |
|-------------|-----------------|----------------------------------|-------|
| gb:MT020881 | Organism:Severe | TATTCTGACCAGACCGTTCTAGAAAAGTGAAC | 26962 |
| gb:MT020880 | Organism:Severe | TATTCTGACCAGACCGTTCTAGAAAAGTGAAC | 26962 |
| gb:MT066175 | Organism:Severe | TATTCTGACCAGACCGTTCTAGAAAAGTGAAC | 26962 |
| gb:MN997409 | Organism:Severe | TATTCTGACCAGACCGTTCTAGAAAAGTGAAC | 26962 |
| gb:MN938384 | Organism:Severe | TATTCTGACCAGACCGTTCTAGAAAAGTGAAC | 26930 |
| gb:MT044258 | Organism:Severe | TATTCTGACCAGACCGTTCTAGAAAAGTGAAC | 26938 |
| gb:MT039890 | Organism:Severe | TATTCTGACCAGACCGTTCTAGAAAAGTGAAC | 26962 |
| gb:MN988713 | Organism:Severe | TATTCTGACCAGACCGTTCTAGAAAAGTGAAC | 26962 |
| gb:LC521925 | Organism:Severe | TATTCTGACCAGACCGTTCTAGAAAAGTGAAC | 26935 |
| gb:MT093571 | Organism:Severe | TATTCTGACCAGACCGTTCTAGAAAAGTGAAC | 26962 |
| gb:MT039887 | Organism:Severe | TATTCTGACCAGACCGTTCTAGAAAAGTGAAC | 26959 |
| gb:MT019530 | Organism:Severe | TATTCTGACCAGACCGTTCTAGAAAAGTGAAC | 26962 |
| gb:MT039888 | Organism:Severe | TATTCTGACCAGACCGTTCTAGAAAAGTGAAC | 26962 |
| gb:LC522972 | Organism:Severe | TATTCTGACCAGACCGTTCTAGAAAAGTGAAC | 26959 |
| gb:MT027063 | Organism:Severe | TATTCTGACCAGACCGTTCTAGAAAAGTGAAC | 26962 |
| gb:MT027062 | Organism:Severe | TATTCTGACCAGACCGTTCTAGAAAAGTGAAC | 26962 |
| gb:MT019529 | Organism:Severe | TATTCTGACCAGACCGTTCTAGAAAAGTGAAC | 26962 |
| gb:MN996529 | Organism:Severe | TATTCTGACCAGACCGTTCTAGAAAAGTGAAC | 26950 |
| gb:MN996531 | Organism:Severe | TATTCTGACCAGACCGTTCTAGAAAAGTGAAC | 26949 |
| gb:MT066176 | Organism:Severe | TATTCTGACCAGACCGTTCTAGAAAAGTGAAC | 26962 |
| gb:MT027064 | Organism:Severe | TATTCTGACCAGACCGTTCTAGAAAAGTGAAC | 26962 |
| gb:MN994468 | Organism:Severe | TATTCTGACCAGACCGTTCTAGAAAAGTGAAC | 26962 |
| gb:MT072688 | Organism:Severe | TATTCTGACCAGACCGTTCTAGAAAAGTGAAC | 26947 |
| gb:MN996527 | Organism:Severe | TATTCTGACCAGACCGTTCTAGAAAAGTGAAC | 26929 |
| gb:MT093631 | Organism:Severe | TATTCTGACCAGACCGTTCTAGAAAAGTGAAC | 27000 |
| gb:MT106053 | Organism:Severe | TATTCTGACCAGACCGTTCTAGAAAAGTGAAC | 26962 |
| gb:MT019533 | Organism:Severe | TATTCTGACCAGACCGTTCTAGAAAAGTGAAC | 26962 |
| gb:MT019531 | Organism:Severe | TATTCTGACCAGACCGTTCTAGAAAAGTGAAC | 26962 |
| gb:MN996528 | Organism:Severe | TATTCTGACCAGACCGTTCTAGAAAAGTGAAC | 26962 |
| gb:MN996530 | Organism:Severe | TATTCTGACCAGACCGTTCTAGAAAAGTGAAC | 26948 |
| gb:MN908947 | Organism:Severe | TATTCTGACCAGACCGTTCTAGAAAAGTGAAC | 26962 |
| gb:MT019532 | Organism:Severe | TATTCTGACCAGACCGTTCTAGAAAAGTGAAC | 26962 |

\*\*\*\*\*

|             |                 |                                                              |       |
|-------------|-----------------|--------------------------------------------------------------|-------|
| gb:MT020781 | Organism:Severe | ACATCTTCGTATTGCTGGACACCATCTAGGACGCTGTGACATCAAGGACCTGCCTAAAGA | 27010 |
| gb:MT007544 | Organism:Severe | ACATCTTCGTATTGCTGGACACCATCTAGGACGCTGTGACATCAAGGACCTGCCTAAAGA | 27022 |
| gb:MN994467 | Organism:Severe | ACATCTTCGTATTGCTGGACACCATCTAGGACGCTGTGACATCAAGGACCTGCCTAAAGA | 27022 |
| gb:MT044257 | Organism:Severe | ACATCTTCGTATTGCTGGACACCATCTAGGACGCTGTGACATCAAGGACCTGCCTAAAGA | 27022 |
| gb:MT106054 | Organism:Severe | ACATCTTCGTATTGCTGGACACCATCTAGGACGCTGTGACATCAAGGACCTGCCTAAAGA | 27022 |
| gb:MT049951 | Organism:Severe | ACATCTTCGTATTGCTGGACACCATCTAGGACGCTGTGACATCAAGGACCTGCCTAAAGA | 27022 |
| gb:MN975262 | Organism:Severe | ACATCTTCGTATTGCTGGACACCATCTAGGACGCTGTGACATCAAGGACCTGCCTAAAGA | 27022 |
| gb:MT106052 | Organism:Severe | ACATCTTCGTATTGCTGGACACCATCTAGGACGCTGTGACATCAAGGACCTGCCTAAAGA | 27022 |
| gb:LC522975 | Organism:Severe | ACATCTTCGTATTGCTGGACACCATCTAGGACGCTGTGACATCAAGGACCTGCCTAAAGA | 27019 |
| gb:LC522973 | Organism:Severe | ACATCTTCGTATTGCTGGACACCATCTAGGACGCTGTGACATCAAGGACCTGCCTAAAGA | 27019 |
| gb:LC522974 | Organism:Severe | ACATCTTCGTATTGCTGGACACCATCTAGGACGCTGTGACATCAAGGACCTGCCTAAAGA | 27019 |
| gb:MN985325 | Organism:Severe | ACATCTTCGTATTGCTGGACACCATCTAGGACGCTGTGACATCAAGGACCTGCCTAAAGA | 27022 |
| gb:MT020881 | Organism:Severe | ACATCTTCGTATTGCTGGACACCATCTAGGACGCTGTGACATCAAGGACCTGCCTAAAGA | 27022 |
| gb:MT020880 | Organism:Severe | ACATCTTCGTATTGCTGGACACCATCTAGGACGCTGTGACATCAAGGACCTGCCTAAAGA | 27022 |
| gb:MT066175 | Organism:Severe | ACATCTTCGTATTGCTGGACACCATCTAGGACGCTGTGACATCAAGGACCTGCCTAAAGA | 27022 |
| gb:MN997409 | Organism:Severe | ACATCTTCGTATTGCTGGACACCATCTAGGACGCTGTGACATCAAGGACCTGCCTAAAGA | 27022 |
| gb:MN938384 | Organism:Severe | ACATCTTCGTATTGCTGGACACCATCTAGGACGCTGTGACATCAAGGACCTGCCTAAAGA | 26990 |
| gb:MT044258 | Organism:Severe | ACATCTTCGTATTGCTGGACACCATCTAGGACGCTGTGACATCAAGGACCTGCCTAAAGA | 26998 |
| gb:MT039890 | Organism:Severe | ACATCTTCGTATTGCTGGACACCATCTAGGACGCTGTGACATCAAGGACCTGCCTAAAGA | 27022 |
| gb:MN988713 | Organism:Severe | ACATCTTCGTATTGCTGGACACCATCTAGGACGCTGTGACATCAAGGACCTGCCTAAAGA | 27022 |
| gb:LC521925 | Organism:Severe | ACATCTTCGTATTGCTGGACACCATCTAGGACGCTGTGACATCAAGGACCTGCCTAAAGA | 26995 |
| gb:MT093571 | Organism:Severe | ACATCTTCGTATTGCTGGACACCATCTAGGACGCTGTGACATCAAGGACCTGCCTAAAGA | 27022 |
| gb:MT039887 | Organism:Severe | ACATCTTCGTATTGCTGGACACCATCTAGGACGCTGTGACATCAAGGACCTGCCTAAAGA | 27019 |
| gb:MT019530 | Organism:Severe | ACATCTTCGTATTGCTGGACACCATCTAGGACGCTGTGACATCAAGGACCTGCCTAAAGA | 27022 |
| gb:MT039888 | Organism:Severe | ACATCTTCGTATTGCTGGACACCATCTAGGACGCTGTGACATCAAGGACCTGCCTAAAGA | 27022 |
| gb:LC522972 | Organism:Severe | ACATCTTCGTATTGCTGGACACCATCTAGGACGCTGTGACATCAAGGACCTGCCTAAAGA | 27019 |
| gb:MT027063 | Organism:Severe | ACATCTTCGTATTGCTGGACACCATCTAGGACGCTGTGACATCAAGGACCTGCCTAAAGA | 27022 |
| gb:MT027062 | Organism:Severe | ACATCTTCGTATTGCTGGACACCATCTAGGACGCTGTGACATCAAGGACCTGCCTAAAGA | 27022 |
| gb:MT019529 | Organism:Severe | ACATCTTCGTATTGCTGGACACCATCTAGGACGCTGTGACATCAAGGACCTGCCTAAAGA | 27022 |
| gb:MN996529 | Organism:Severe | ACATCTTCGTATTGCTGGACACCATCTAGGACGCTGTGACATCAAGGACCTGCCTAAAGA | 27010 |
| gb:MN996531 | Organism:Severe | ACATCTTCGTATTGCTGGACACCATCTAGGACGCTGTGACATCAAGGACCTGCCTAAAGA | 27009 |



|             |                 |                                                              |       |
|-------------|-----------------|--------------------------------------------------------------|-------|
| gb:MT066176 | Organism:Severe | ACATCTTCGTATTGCTGGACACCATCTAGGACGCTGTGACATCAAGGACCTGCCTAAAGA | 27022 |
| gb:MT027064 | Organism:Severe | ACATCTTCGTATTGCTGGACACCATCTAGGACGCTGTGACATCAAGGACCTGCCTAAAGA | 27022 |
| gb:MN994468 | Organism:Severe | ACATCTTCGTATTGCTGGACACCATCTAGGACGCTGTGACATCAAGGACCTGCCTAAAGA | 27022 |
| gb:MT072688 | Organism:Severe | ACATCTTCGTATTGCTGGACACCATCTAGGACGCTGTGACATCAAGGACCTGCCTAAAGA | 27007 |
| gb:MN996527 | Organism:Severe | ACATCTTCGTATTGCTGGACACCATCTAGGACGCTGTGACATCAAGGACCTGCCTAAAGA | 26989 |
| gb:MT093631 | Organism:Severe | ACATCTTCGTATTGCTGGACACCATCTAGGACGCTGTGACATCAAGGACCTGCCTAAAGA | 27060 |
| gb:MT106053 | Organism:Severe | ACATCTTCGTATTGCTGGACACCATCTAGGACGCTGTGACATCAAGGACCTGCCTAAAGA | 27022 |
| gb:MT019533 | Organism:Severe | ACATCTTCGTATTGCTGGACACCATCTAGGACGCTGTGACATCAAGGACCTGCCTAAAGA | 27022 |
| gb:MT019531 | Organism:Severe | ACATCTTCGTATTGCTGGACACCATCTAGGACGCTGTGACATCAAGGACCTGCCTAAAGA | 27022 |
| gb:MN996528 | Organism:Severe | ACATCTTCGTATTGCTGGACACCATCTAGGACGCTGTGACATCAAGGACCTGCCTAAAGA | 27022 |
| gb:MN996530 | Organism:Severe | ACATCTTCGTATTGCTGGACACCATCTAGGACGCTGTGACATCAAGGACCTGCCTAAAGA | 27008 |
| gb:MN908947 | Organism:Severe | ACATCTTCGTATTGCTGGACACCATCTAGGACGCTGTGACATCAAGGACCTGCCTAAAGA | 27022 |
| gb:MT019532 | Organism:Severe | ACATCTTCGTATTGCTGGACACCATCTAGGACGCTGTGACATCAAGGACCTGCCTAAAGA | 27022 |

\*\*\*\*\*

|             |                 |                                                              |       |
|-------------|-----------------|--------------------------------------------------------------|-------|
| gb:MT020781 | Organism:Severe | AATCACTGTTGCTACATCACGAACGCTTTCTTATTACAAATTGGGAGCTTCGCAGCGTGT | 27070 |
| gb:MT007544 | Organism:Severe | AATCACTGTTGCTACATCACGAACGCTTTCTTATTACAAATTGGGAGCTTCGCAGCGTGT | 27082 |
| gb:MN994467 | Organism:Severe | AATCACTGTTGCTACATCACGAACGCTTTCTTATTACAAATTGGGAGCTTCGCAGCGTGT | 27082 |
| gb:MT044257 | Organism:Severe | AATCACTGTTGCTACATCACGAACGCTTTCTTATTACAAATTGGGAGCTTCGCAGCGTGT | 27082 |
| gb:MT106054 | Organism:Severe | AATCACTGTTGCTACATCACGAACGCTTTCTTATTACAAATTGGGAGCTTCGCAGCGTGT | 27082 |
| gb:MT049951 | Organism:Severe | AATCACTGTTGCTACATCACGAACGCTTTCTTATTACAAATTGGGAGCTTCGCAGCGTGT | 27082 |
| gb:MN975262 | Organism:Severe | AATCACTGTTGCTACATCACGAACGCTTTCTTATTACAAATTGGGAGCTTCGCAGCGTGT | 27082 |
| gb:MT106052 | Organism:Severe | AATCACTGTTGCTACATCACGAACGCTTTCTTATTACAAATTGGGAGCTTCGCAGCGTGT | 27082 |
| gb:LC522975 | Organism:Severe | AATCACTGTTGCTACATCACGAACGCTTTCTTATTACAAATTGGGAGCTTCGCAGCGTGT | 27079 |
| gb:LC522973 | Organism:Severe | AATCACTGTTGCTACATCACGAACGCTTTCTTATTACAAATTGGGAGCTTCGCAGCGTGT | 27079 |
| gb:LC522974 | Organism:Severe | AATCACTGTTGCTACATCACGAACGCTTTCTTATTACAAATTGGGAGCTTCGCAGCGTGT | 27079 |
| gb:MN985325 | Organism:Severe | AATCACTGTTGCTACATCACGAACGCTTTCTTATTACAAATTGGGAGCTTCGCAGCGTGT | 27082 |
| gb:MT020881 | Organism:Severe | AATCACTGTTGCTACATCACGAACGCTTTCTTATTACAAATTGGGAGCTTCGCAGCGTGT | 27082 |
| gb:MT020880 | Organism:Severe | AATCACTGTTGCTACATCACGAACGCTTTCTTATTACAAATTGGGAGCTTCGCAGCGTGT | 27082 |
| gb:MT066175 | Organism:Severe | AATCACTGTTGCTACATCACGAACGCTTTCTTATTACAAATTGGGAGCTTCGCAGCGTGT | 27082 |
| gb:MN997409 | Organism:Severe | AATCACTGTTGCTACATCACGAACGCTTTCTTATTACAAATTGGGAGCTTCGCAGCGTGT | 27082 |
| gb:MN938384 | Organism:Severe | AATCACTGTTGCTACATCACGAACGCTTTCTTATTACAAATTGGGAGCTTCGCAGCGTGT | 27050 |
| gb:MT044258 | Organism:Severe | AATCACTGTTGCTACATCACGAACGCTTTCTTATTACAAATTGGGAGCTTCGCAGCGTGT | 27058 |
| gb:MT039890 | Organism:Severe | AATCACTGTTGCTACATCACGAACGCTTTCTTATTACAAATTGGGAGCTTCGCAGCGTGT | 27082 |
| gb:MN988713 | Organism:Severe | AATCACTGTTGCTACATCACGAACGCTTTCTTATTACAAATTGGGAGCTTCGCAGCGTGT | 27082 |
| gb:LC521925 | Organism:Severe | AATCACTGTTGCTACATCACGAACGCTTTCTTATTACAAATTGGGAGCTTCGCAGCGTGT | 27055 |
| gb:MT093571 | Organism:Severe | AATCACTGTTGCTACATCACGAACGCTTTCTTATTACAAATTGGGAGCTTCGCAGCGTGT | 27082 |
| gb:MT039887 | Organism:Severe | AATCACTGTTGCTACATCACGAACGCTTTCTTATTACAAATTGGGAGCTTCGCAGCGTGT | 27079 |
| gb:MT019530 | Organism:Severe | AATCACTGTTGCTACATCACGAACGCTTTCTTATTACAAATTGGGAGCTTCGCAGCGTGT | 27082 |
| gb:MT039888 | Organism:Severe | AATCACTGTTGCTACATCACGAACGCTTTCTTATTACAAATTGGGAGCTTCGCAGCGTGT | 27082 |
| gb:LC522972 | Organism:Severe | AATCACTGTTGCTACATCACGAACGCTTTCTTATTACAAATTGGGAGCTTCGCAGCGTGT | 27079 |
| gb:MT027063 | Organism:Severe | AATCACTGTTGCTACATCACGAACGCTTTCTTATTACAAATTGGGAGCTTCGCAGCGTGT | 27082 |
| gb:MT027062 | Organism:Severe | AATCACTGTTGCTACATCACGAACGCTTTCTTATTACAAATTGGGAGCTTCGCAGCGTGT | 27082 |
| gb:MT019529 | Organism:Severe | AATCACTGTTGCTACATCACGAACGCTTTCTTATTACAAATTGGGAGCTTCGCAGCGTGT | 27082 |
| gb:MN996529 | Organism:Severe | AATCACTGTTGCTACATCACGAACGCTTTCTTATTACAAATTGGGAGCTTCGCAGCGTGT | 27070 |
| gb:MN996531 | Organism:Severe | AATCACTGTTGCTACATCACGAACGCTTTCTTATTACAAATTGGGAGCTTCGCAGCGTGT | 27069 |
| gb:MT066176 | Organism:Severe | AATCACTGTTGCTACATCACGAACGCTTTCTTATTACAAATTGGGAGCTTCGCAGCGTGT | 27082 |
| gb:MT027064 | Organism:Severe | AATCACTGTTGCTACATCACGAACGCTTTCTTATTACAAATTGGGAGCTTCGCAGCGTGT | 27082 |
| gb:MN994468 | Organism:Severe | AATCACTGTTGCTACATCACGAACGCTTTCTTATTACAAATTGGGAGCTTCGCAGCGTGT | 27082 |
| gb:MT072688 | Organism:Severe | AATCACTGTTGCTACATCACGAACGCTTTCTTATTACAAATTGGGAGCTTCGCAGCGTGT | 27067 |
| gb:MN996527 | Organism:Severe | AATCACTGTTGCTACATCACGAACGCTTTCTTATTACAAATTGGGAGCTTCGCAGCGTGT | 27049 |
| gb:MT093631 | Organism:Severe | AATCACTGTTGCTACATCACGAACGCTTTCTTATTACAAATTGGGAGCTTCGCAGCGTGT | 27120 |
| gb:MT106053 | Organism:Severe | AATCACTGTTGCTACATCACGAACGCTTTCTTATTACAAATTGGGAGCTTCGCAGCGTGT | 27082 |
| gb:MT019533 | Organism:Severe | AATCACTGTTGCTACATCACGAACGCTTTCTTATTACAAATTGGGAGCTTCGCAGCGTGT | 27082 |
| gb:MT019531 | Organism:Severe | AATCACTGTTGCTACATCACGAACGCTTTCTTATTACAAATTGGGAGCTTCGCAGCGTGT | 27082 |
| gb:MN996528 | Organism:Severe | AATCACTGTTGCTACATCACGAACGCTTTCTTATTACAAATTGGGAGCTTCGCAGCGTGT | 27082 |
| gb:MN996530 | Organism:Severe | AATCACTGTTGCTACATCACGAACGCTTTCTTATTACAAATTGGGAGCTTCGCAGCGTGT | 27068 |
| gb:MN908947 | Organism:Severe | AATCACTGTTGCTACATCACGAACGCTTTCTTATTACAAATTGGGAGCTTCGCAGCGTGT | 27082 |
| gb:MT019532 | Organism:Severe | AATCACTGTTGCTACATCACGAACGCTTTCTTATTACAAATTGGGAGCTTCGCAGCGTGT | 27082 |

\*\*\*\*\*

|             |                 |                                                              |       |
|-------------|-----------------|--------------------------------------------------------------|-------|
| gb:MT020781 | Organism:Severe | AGCAGGTGACTCAGGTTTTGCTGCATACAGTCGCTACAGGATTGGCAACTATAAATTTAA | 27130 |
| gb:MT007544 | Organism:Severe | AGCAGGTGACTCAGGTTTTGCTGCATACAGTCGCTACAGGATTGGCAACTATAAATTTAA | 27142 |
| gb:MN994467 | Organism:Severe | AGCAGGTGACTCAGGTTTTGCTGCATACAGTCGCTACAGGATTGGCAACTATAAATTTAA | 27142 |
| gb:MT044257 | Organism:Severe | AGCAGGTGACTCAGGTTTTGCTGCATACAGTCGCTACAGGATTGGCAACTATAAATTTAA | 27142 |

|             |                 |                                                             |       |
|-------------|-----------------|-------------------------------------------------------------|-------|
| gb:MT106054 | Organism:Severe | AGCAGGTGACTCAGGTTTTGCTGCATACAGTCGCTACAGGATTGGCAACTATAAAATTA | 27142 |
| gb:MT049951 | Organism:Severe | AGCAGGTGACTCAGGTTTTGCTGCATACAGTCGCTACAGGATTGGCAACTATAAAATTA | 27142 |
| gb:MN975262 | Organism:Severe | AGCAGGTGACTCAGGTTTTGCTGCATACAGTCGCTACAGGATTGGCAACTATAAAATTA | 27142 |
| gb:MT106052 | Organism:Severe | AGCAGGTGACTCAGGTTTTGCTGCATACAGTCGCTACAGGATTGGCAACTATAAAATTA | 27142 |
| gb:LC522975 | Organism:Severe | AGCAGGTGACTCAGGTTTTGCTGCATACAGTCGCTACAGGATTGGCAACTATAAAATTA | 27139 |
| gb:LC522973 | Organism:Severe | AGCAGGTGACTCAGGTTTTGCTGCATACAGTCGCTACAGGATTGGCAACTATAAAATTA | 27139 |
| gb:LC522974 | Organism:Severe | AGCAGGTGACTCAGGTTTTGCTGCATACAGTCGCTACAGGATTGGCAACTATAAAATTA | 27139 |
| gb:MN985325 | Organism:Severe | AGCAGGTGACTCAGGTTTTGCTGCATACAGTCGCTACAGGATTGGCAACTATAAAATTA | 27142 |
| gb:MT020881 | Organism:Severe | AGCAGGTGACTCAGGTTTTGCTGCATACAGTCGCTACAGGATTGGCAACTATAAAATTA | 27142 |
| gb:MT020880 | Organism:Severe | AGCAGGTGACTCAGGTTTTGCTGCATACAGTCGCTACAGGATTGGCAACTATAAAATTA | 27142 |
| gb:MT066175 | Organism:Severe | AGCAGGTGACTCAGGTTTTGCTGCATACAGTCGCTACAGGATTGGCAACTATAAAATTA | 27142 |
| gb:MN997409 | Organism:Severe | AGCAGGTGACTCAGGTTTTGCTGCATACAGTCGCTACAGGATTGGCAACTATAAAATTA | 27142 |
| gb:MN938384 | Organism:Severe | AGCAGGTGACTCAGGTTTTGCTGCATACAGTCGCTACAGGATTGGCAACTATAAAATTA | 27110 |
| gb:MT044258 | Organism:Severe | AGCAGGTGACTCAGGTTTTGCTGCATACAGTCGCTACAGGATTGGCAACTATAAAATTA | 27118 |
| gb:MT039890 | Organism:Severe | AGCAGGTGACTCAGGTTTTGCTGCATACAGTCGCTACAGGATTGGCAACTATAAAATTA | 27142 |
| gb:MN988713 | Organism:Severe | AGCAGGTGACTCAGGTTTTGCTGCATACAGTCGCTACAGGATTGGCAACTATAAAATTA | 27142 |
| gb:LC521925 | Organism:Severe | AGCAGGTGACTCAGGTTTTGCTGCATACAGTCGCTACAGGATTGGCAACTATAAAATTA | 27115 |
| gb:MT093571 | Organism:Severe | AGCAGGTGACTCAGGTTTTGCTGCATACAGTCGCTACAGGATTGGCAACTATAAAATTA | 27142 |
| gb:MT039887 | Organism:Severe | AGCAGGTGACTCAGGTTTTGCTGCATACAGTCGCTACAGGATTGGCAACTATAAAATTA | 27139 |
| gb:MT019530 | Organism:Severe | AGCAGGTGACTCAGGTTTTGCTGCATACAGTCGCTACAGGATTGGCAACTATAAAATTA | 27142 |
| gb:MT039888 | Organism:Severe | AGCAGGTGACTCAGGTTTTGCTGCATACAGTCGCTACAGGATTGGCAACTATAAAATTA | 27142 |
| gb:LC522972 | Organism:Severe | AGCAGGTGACTCAGGTTTTGCTGCATACAGTCGCTACAGGATTGGCAACTATAAAATTA | 27139 |
| gb:MT027063 | Organism:Severe | AGCAGGTGACTCAGGTTTTGCTGCATACAGTCGCTACAGGATTGGCAACTATAAAATTA | 27142 |
| gb:MT027062 | Organism:Severe | AGCAGGTGACTCAGGTTTTGCTGCATACAGTCGCTACAGGATTGGCAACTATAAAATTA | 27142 |
| gb:MT019529 | Organism:Severe | AGCAGGTGACTCAGGTTTTGCTGCATACAGTCGCTACAGGATTGGCAACTATAAAATTA | 27142 |
| gb:MN996529 | Organism:Severe | AGCAGGTGACTCAGGTTTTGCTGCATACAGTCGCTACAGGATTGGCAACTATAAAATTA | 27130 |
| gb:MN996531 | Organism:Severe | AGCAGGTGACTCAGGTTTTGCTGCATACAGTCGCTACAGGATTGGCAACTATAAAATTA | 27129 |
| gb:MT066176 | Organism:Severe | AGCAGGTGACTCAGGTTTTGCTGCATACAGTCGCTACAGGATTGGCAACTATAAAATTA | 27142 |
| gb:MT027064 | Organism:Severe | AGCAGGTGACTCAGGTTTTGCTGCATACAGTCGCTACAGGATTGGCAACTATAAAATTA | 27142 |
| gb:MN994468 | Organism:Severe | AGCAGGTGACTCAGGTTTTGCTGCATACAGTCGCTACAGGATTGGCAACTATAAAATTA | 27142 |
| gb:MT072688 | Organism:Severe | AGCAGGTGACTCAGGTTTTGCTGCATACAGTCGCTACAGGATTGGCAACTATAAAATTA | 27127 |
| gb:MN996527 | Organism:Severe | AGCAGGTGACTCAGGTTTTGCTGCATACAGTCGCTACAGGATTGGCAACTATAAAATTA | 27109 |
| gb:MT093631 | Organism:Severe | AGCAGGTGACTCAGGTTTTGCTGCATACAGTCGCTACAGGATTGGCAACTATAAAATTA | 27180 |
| gb:MT106053 | Organism:Severe | AGCAGGTGACTCAGGTTTTGCTGCATACAGTCGCTACAGGATTGGCAACTATAAAATTA | 27142 |
| gb:MT019533 | Organism:Severe | AGCAGGTGACTCAGGTTTTGCTGCATACAGTCGCTACAGGATTGGCAACTATAAAATTA | 27142 |
| gb:MT019531 | Organism:Severe | AGCAGGTGACTCAGGTTTTGCTGCATACAGTCGCTACAGGATTGGCAACTATAAAATTA | 27142 |
| gb:MN996528 | Organism:Severe | AGCAGGTGACTCAGGTTTTGCTGCATACAGTCGCTACAGGATTGGCAACTATAAAATTA | 27142 |
| gb:MN996530 | Organism:Severe | AGCAGGTGACTCAGGTTTTGCTGCATACAGTCGCTACAGGATTGGCAACTATAAAATTA | 27128 |
| gb:MN908947 | Organism:Severe | AGCAGGTGACTCAGGTTTTGCTGCATACAGTCGCTACAGGATTGGCAACTATAAAATTA | 27142 |
| gb:MT019532 | Organism:Severe | AGCAGGTGACTCAGGTTTTGCTGCATACAGTCGCTACAGGATTGGCAACTATAAAATTA | 27142 |

\*\*\*\*\*

|             |                 |                                                              |       |
|-------------|-----------------|--------------------------------------------------------------|-------|
| gb:MT020781 | Organism:Severe | CACAGACCATTCCAGTAGCAGTGACAATATTGCTTTGCTTGTACAGTAAGTGACAACAGA | 27190 |
| gb:MT007544 | Organism:Severe | CACAGACCATTCCAGTAGCAGTGACAATATTGCTTTGCTTGTACAGTAAGTGACAACAGA | 27202 |
| gb:MN994467 | Organism:Severe | CACAGACCATTCCAGTAGCAGTGACAATATTGCTTTGCTTGTACAGTAAGTGACAACAGA | 27202 |
| gb:MT044257 | Organism:Severe | CACAGACCATTCCAGTAGCAGTGACAATATTGCTTTGCTTGTACAGTAAGTGACAACAGA | 27202 |
| gb:MT106054 | Organism:Severe | CACAGACCATTCCAGTAGCAGTGACAATATTGCTTTGCTTGTACAGTAAGTGACAACAGA | 27202 |
| gb:MT049951 | Organism:Severe | CACAGACCATTCCAGTAGCAGTGACAATATTGCTTTGCTTGTACAGTAAGTGACAACAGA | 27202 |
| gb:MN975262 | Organism:Severe | CACAGACCATTCCAGTAGCAGTGACAATATTGCTTTGCTTGTACAGTAAGTGACAACAGA | 27202 |
| gb:MT106052 | Organism:Severe | CACAGACCATTCCAGTAGCAGTGACAATATTGCTTTGCTTGTACAGTAAGTGACAACAGA | 27202 |
| gb:LC522975 | Organism:Severe | CACAGACCATTCCAGTAGCAGTGACAATATTGCTTTGCTTGTACAGTAAGTGACAACAGA | 27199 |
| gb:LC522973 | Organism:Severe | CACAGACCATTCCAGTAGCAGTGACAATATTGCTTTGCTTGTACAGTAAGTGACAACAGA | 27199 |
| gb:LC522974 | Organism:Severe | CACAGACCATTCCAGTAGCAGTGACAATATTGCTTTGCTTGTACAGTAAGTGACAACAGA | 27199 |
| gb:MN985325 | Organism:Severe | CACAGACCATTCCAGTAGCAGTGACAATATTGCTTTGCTTGTACAGTAAGTGACAACAGA | 27202 |
| gb:MT020881 | Organism:Severe | CACAGACCATTCCAGTAGCAGTGACAATATTGCTTTGCTTGTACAGTAAGTGACAACAGA | 27202 |
| gb:MT020880 | Organism:Severe | CACAGACCATTCCAGTAGCAGTGACAATATTGCTTTGCTTGTACAGTAAGTGACAACAGA | 27202 |
| gb:MT066175 | Organism:Severe | CACAGACCATTCCAGTAGCAGTGACAATATTGCTTTGCTTGTACAGTAAGTGACAACAGA | 27202 |
| gb:MN997409 | Organism:Severe | CACAGACCATTCCAGTAGCAGTGACAATATTGCTTTGCTTGTACAGTAAGTGACAACAGA | 27202 |
| gb:MN938384 | Organism:Severe | CACAGACCATTCCAGTAGCAGTGACAATATTGCTTTGCTTGTACAGTAAGTGACAACAGA | 27170 |
| gb:MT044258 | Organism:Severe | CACAGACCATTCCAGTAGCAGTGACAATATTGCTTTGCTTGTACAGTAAGTGACAACAGA | 27178 |
| gb:MT039890 | Organism:Severe | CACAGACCATTCCAGTAGCAGTGACAATATTGCTTTGCTTGTACAGTAAGTGACAACAGA | 27202 |
| gb:MN988713 | Organism:Severe | CACAGACCATTCCAGTAGCAGTGACAATATTGCTTTGCTTGTACAGTAAGTGACAACAGA | 27202 |
| gb:LC521925 | Organism:Severe | CACAGACCATTCCAGTAGCAGTGACAATATTGCTTTGCTTGTACAGTAAGTGACAACAGA | 27175 |
| gb:MT093571 | Organism:Severe | CACAGACCATTCCAGTAGCAGTGACAATATTGCTTTGCTTGTACAGTAAGTGACAACAGA | 27202 |
| gb:MT039887 | Organism:Severe | CACAGACCATTCCAGTAGCAGTGACAATATTGCTTTGCTTGTACAGTAAGTGACAACAGA | 27199 |



|             |                 |                                                                      |       |
|-------------|-----------------|----------------------------------------------------------------------|-------|
| gb:MN908947 | Organism:Severe | TGTTTCATCTCGTTGACTTTCAGGTTACTATAGCAGAGATTTACTAATTATTATGAGGA          | 27262 |
| gb:MT019532 | Organism:Severe | TGTTTCATCTCGTTGACTTTCAGGTTACTATAGCAGAGATTTACTAATTATTATGAGGA<br>***** | 27262 |

|             |                 |                                                                       |       |
|-------------|-----------------|-----------------------------------------------------------------------|-------|
| gb:MT020781 | Organism:Severe | CTTTTAAAGTTTCCATTTGGAATCTTGATTACATCATAAACCTCATAATTAATAATTTAT          | 27310 |
| gb:MT007544 | Organism:Severe | CTTTTAAAGTTTCCATTTGGAATCTTGATTACATCATAAACCTCATAATTAATAATTTAT          | 27322 |
| gb:MN994467 | Organism:Severe | CTTTTAAAGTTTCCATTTGGAATCTTGATTACATCATAAACCTCATAATTAATAATTTAT          | 27322 |
| gb:MT044257 | Organism:Severe | CTTTTAAAGTTTCCATTTGGAATCTTGATTACATCATAAACCTCATAATTAATAATTTAT          | 27322 |
| gb:MT106054 | Organism:Severe | CTTTTAAAGTTTCCATTTGGAATCTTGATTACATCATAAACCTCATAATTAATAATTTAT          | 27322 |
| gb:MT049951 | Organism:Severe | CTTTTAAAGTTTCCATTTGGAATCTTGATTACATCATAAACCTCATAATTAATAATTTAT          | 27322 |
| gb:MN975262 | Organism:Severe | CTTTTAAAGTTTCCATTTGGAATCTTGATTACATCATAAACCTCATAATTAATAATTTAT          | 27322 |
| gb:MT106052 | Organism:Severe | CTTTTAAAGTTTCCATTTGGAATCTTGATTACATCATAAACCTCATAATTAATAATTTAT          | 27322 |
| gb:LC522975 | Organism:Severe | CTTTTAAAGTTTCCATTTGGAATCTTGATTACATCATAAACCTCATAATTAATAATTTAT          | 27319 |
| gb:LC522973 | Organism:Severe | CTTTTAAAGTTTCCATTTGGAATCTTGATTACATCATAAACCTCATAATTAATAATTTAT          | 27319 |
| gb:LC522974 | Organism:Severe | CTTTTAAAGTTTCCATTTGGAATCTTGATTACATCATAAACCTCATAATTAATAATTTAT          | 27319 |
| gb:MN985325 | Organism:Severe | CTTTTAAAGTTTCCATTTGGAATCTTGATTACATCATAAACCTCATAATTAATAATTTAT          | 27322 |
| gb:MT020881 | Organism:Severe | CTTTTAAAGTTTCCATTTGGAATCTTGATTACATCATAAACCTCATAATTAATAATTTAT          | 27322 |
| gb:MT020880 | Organism:Severe | CTTTTAAAGTTTCCATTTGGAATCTTGATTACATCATAAACCTCATAATTAATAATTTAT          | 27322 |
| gb:MT066175 | Organism:Severe | CTTTTAAAGTTTCCATTTGGAATCTTGATTACATCATAAACCTCATAATTAATAATTTAT          | 27322 |
| gb:MN997409 | Organism:Severe | CTTTTAAAGTTTCCATTTGGAATCTTGATTACATCATAAACCTCATAATTAATAATTTAT          | 27322 |
| gb:MN938384 | Organism:Severe | CTTTTAAAGTTTCCATTTGGAATCTTGATTACATCATAAACCTCATAATTAATAATTTAT          | 27290 |
| gb:MT044258 | Organism:Severe | CTTTTAAAGTTTCCATTTGGAATCTTGATTACATCATAAACCTCATAATTAATAATTTAT          | 27298 |
| gb:MT039890 | Organism:Severe | CTTTTAAAGTTTCCATTTGGAATCTTGATTACATCATAAACCTCATAATTAATAATTTAT          | 27322 |
| gb:MN988713 | Organism:Severe | CTTTTAAAGTTTCCATTTGGAATCTTGATTACATCATAAACCTCATAATTAATAATTTAT          | 27322 |
| gb:LC521925 | Organism:Severe | CTTTTAAAGTTTCCATTTGGAATCTTGATTACATCATAAACCTCATAATTAATAATTTAT          | 27295 |
| gb:MT093571 | Organism:Severe | CTTTTAAAGTTTCCATTTGGAATCTTGATTACATCATAAACCTCATAATTAATAATTTAT          | 27322 |
| gb:MT039887 | Organism:Severe | CTTTTAAAGTTTCCATTTGGAATCTTGATTACATCATAAACCTCATAATTAATAATTTAT          | 27319 |
| gb:MT019530 | Organism:Severe | CTTTTAAAGTTTCCATTTGGAATCTTGATTACATCATAAACCTCATAATTAATAATTTAT          | 27322 |
| gb:MT039888 | Organism:Severe | CTTTTAAAGTTTCCATTTGGAATCTTGATTACATCATAAACCTCATAATTAATAATTTAT          | 27322 |
| gb:LC522972 | Organism:Severe | CTTTTAAAGTTTCCATTTGGAATCTTGATTACATCATAAACCTCATAATTAATAATTTAT          | 27319 |
| gb:MT027063 | Organism:Severe | CTTTTAAAGTTTCCATTTGGAATCTTGATTACATCATAAACCTCATAATTAATAATTTAT          | 27322 |
| gb:MT027062 | Organism:Severe | CTTTTAAAGTTTCCATTTGGAATCTTGATTACATCATAAACCTCATAATTAATAATTTAT          | 27322 |
| gb:MT019529 | Organism:Severe | CTTTTAAAGTTTCCATTTGGAATCTTGATTACATCATAAACCTCATAATTAATAATTTAT          | 27322 |
| gb:MN996529 | Organism:Severe | CTTTTAAAGTTTCCATTTGGAATCTTGATTACATCATAAACCTCATAATTAATAATTTAT          | 27310 |
| gb:MN996531 | Organism:Severe | CTTTTAAAGTTTCCATTTGGAATCTTGATTACATCATAAACCTCATAATTAATAATTTAT          | 27309 |
| gb:MT066176 | Organism:Severe | CTTTTAAAGTTTCCATTTGGAATCTTGATTACATCATAAACCTCATAATTAATAATTTAT          | 27322 |
| gb:MT027064 | Organism:Severe | CTTTTAAAGTTTCCATTTGGAATCTTGATTACATCATAAACCTCATAATTAATAATTTAT          | 27322 |
| gb:MN994468 | Organism:Severe | CTTTTAAAGTTTCCATTTGGAATCTTGATTACATCATAAACCTCATAATTAATAATTTAT          | 27322 |
| gb:MT072688 | Organism:Severe | CTTTTAAAGTTTCCATTTGGAATCTTGATTACATCATAAACCTCATAATTAATAATTTAT          | 27307 |
| gb:MN996527 | Organism:Severe | CTTTTAAAGTTTCCATTTGGAATCTTGATTACATCATAAACCTCATAATTAATAATTTAT          | 27289 |
| gb:MT093631 | Organism:Severe | CTTTTAAAGTTTCCATTTGGAATCTTGATTACATCATAAACCTCATAATTAATAATTTAT          | 27360 |
| gb:MT106053 | Organism:Severe | CTTTTAAAGTTTCCATTTGGAATCTTGATTACATCATAAACCTCATAATTAATAATTTAT          | 27322 |
| gb:MT019533 | Organism:Severe | CTTTTAAAGTTTCCATTTGGAATCTTGATTACATCATAAACCTCATAATTAATAATTTAT          | 27322 |
| gb:MT019531 | Organism:Severe | CTTTTAAAGTTTCCATTTGGAATCTTGATTACATCATAAACCTCATAATTAATAATTTAT          | 27322 |
| gb:MN996528 | Organism:Severe | CTTTTAAAGTTTCCATTTGGAATCTTGATTACATCATAAACCTCATAATTAATAATTTAT          | 27322 |
| gb:MN996530 | Organism:Severe | CTTTTAAAGTTTCCATTTGGAATCTTGATTACATCATAAACCTCATAATTAATAATTTAT          | 27308 |
| gb:MN908947 | Organism:Severe | CTTTTAAAGTTTCCATTTGGAATCTTGATTACATCATAAACCTCATAATTAATAATTTAT          | 27322 |
| gb:MT019532 | Organism:Severe | CTTTTAAAGTTTCCATTTGGAATCTTGATTACATCATAAACCTCATAATTAATAATTTAT<br>***** | 27322 |

|             |                 |                                                            |       |
|-------------|-----------------|------------------------------------------------------------|-------|
| gb:MT020781 | Organism:Severe | CTAAGTCACTAAGTGAATAAATATTCTCAATTAGATGAAGAGCAACCAATGGAGATTG | 27370 |
| gb:MT007544 | Organism:Severe | CTAAGTCACTAAGTGAATAAATATTCTCAATTAGATGAAGAGCAACCAATGGAGATTG | 27382 |
| gb:MN994467 | Organism:Severe | CTAAGTCACTAAGTGAATAAATATTCTCAATTAGATGAAGAGCAACCAATGGAGATTG | 27382 |
| gb:MT044257 | Organism:Severe | CTAAGTCACTAAGTGAATAAATATTCTCAATTAGATGAAGAGCAACCAATGGAGATTG | 27382 |
| gb:MT106054 | Organism:Severe | CTAAGTCACTAAGTGAATAAATATTCTCAATTAGATGAAGAGCAACCAATGGAGATTG | 27382 |
| gb:MT049951 | Organism:Severe | CTAAGTCACTAAGTGAATAAATATTCTCAATTAGATGAAGAGCAACCAATGGAGATTG | 27382 |
| gb:MN975262 | Organism:Severe | CTAAGTCACTAAGTGAATAAATATTCTCAATTAGATGAAGAGCAACCAATGGAGATTG | 27382 |
| gb:MT106052 | Organism:Severe | CTAAGTCACTAAGTGAATAAATATTCTCAATTAGATGAAGAGCAACCAATGGAGATTG | 27382 |
| gb:LC522975 | Organism:Severe | CTAAGTCACTAAGTGAATAAATATTCTCAATTAGATGAAGAGCAACCAATGGAGATTG | 27379 |
| gb:LC522973 | Organism:Severe | CTAAGTCACTAAGTGAATAAATATTCTCAATTAGATGAAGAGCAACCAATGGAGATTG | 27379 |
| gb:LC522974 | Organism:Severe | CTAAGTCACTAAGTGAATAAATATTCTCAATTAGATGAAGAGCAACCAATGGAGATTG | 27379 |
| gb:MN985325 | Organism:Severe | CTAAGTCACTAAGTGAATAAATATTCTCAATTAGATGAAGAGCAACCAATGGAGATTG | 27382 |
| gb:MT020881 | Organism:Severe | CTAAGTCACTAAGTGAATAAATATTCTCAATTAGATGAAGAGCAACCAATGGAGATTG | 27382 |
| gb:MT020880 | Organism:Severe | CTAAGTCACTAAGTGAATAAATATTCTCAATTAGATGAAGAGCAACCAATGGAGATTG | 27382 |
| gb:MT066175 | Organism:Severe | CTAAGTCACTAAGTGAATAAATATTCTCAATTAGATGAAGAGCAACCAATGGAGATTG | 27382 |

|             |                 |                                                                 |       |
|-------------|-----------------|-----------------------------------------------------------------|-------|
| gb:MN997409 | Organism:Severe | CTAAGTCTACTAAGTCTGAGAATAAATATTCTCAATTAGATGAAGAGCAACCAATGGAGATTG | 27382 |
| gb:MN938384 | Organism:Severe | CTAAGTCTACTAAGTCTGAGAATAAATATTCTCAATTAGATGAAGAGCAACCAATGGAGATTG | 27350 |
| gb:MT044258 | Organism:Severe | CTAAGTCTACTAAGTCTGAGAATAAATATTCTCAATTAGATGAAGAGCAACCAATGGAGATTG | 27358 |
| gb:MT039890 | Organism:Severe | CTAAGTCTACTAAGTCTGAGAATAAATATTCTCAATTAGATGAAGAGCAACCAATGGAGATTG | 27382 |
| gb:MN988713 | Organism:Severe | CTAAGTCTACTAAGTCTGAGAATAAATATTCTCAATTAGATGAAGAGCAACCAATGGAGATTG | 27382 |
| gb:LC521925 | Organism:Severe | CTAAGTCTACTAAGTCTGAGAATAAATATTCTCAATTAGATGAAGAGCAACCAATGGAGATTG | 27355 |
| gb:MT093571 | Organism:Severe | CTAAGTCTACTAAGTCTGAGAATAAATATTCTCAATTAGATGAAGAGCAACCAATGGAGATTG | 27382 |
| gb:MT039887 | Organism:Severe | CTAAGTCTACTAAGTCTGAGAATAAATATTCTCAATTAGATGAAGAGCAACCAATGGAGATTG | 27379 |
| gb:MT019530 | Organism:Severe | CTAAGTCTACTAAGTCTGAGAATAAATATTCTCAATTAGATGAAGAGCAACCAATGGAGATTG | 27382 |
| gb:MT039888 | Organism:Severe | CTAAGTCTACTAAGTCTGAGAATAAATATTCTCAATTAGATGAAGAGCAACCAATGGAGATTG | 27382 |
| gb:LC522972 | Organism:Severe | CTAAGTCTACTAAGTCTGAGAATAAATATTCTCAATTAGATGAAGAGCAACCAATGGAGATTG | 27379 |
| gb:MT027063 | Organism:Severe | CTAAGTCTACTAAGTCTGAGAATAAATATTCTCAATTAGATGAAGAGCAACCAATGGAGATTG | 27382 |
| gb:MT027062 | Organism:Severe | CTAAGTCTACTAAGTCTGAGAATAAATATTCTCAATTAGATGAAGAGCAACCAATGGAGATTG | 27382 |
| gb:MT019529 | Organism:Severe | CTAAGTCTACTAAGTCTGAGAATAAATATTCTCAATTAGATGAAGAGCAACCAATGGAGATTG | 27382 |
| gb:MN996529 | Organism:Severe | CTAAGTCTACTAAGTCTGAGAATAAATATTCTCAATTAGATGAAGAGCAACCAATGGAGATTG | 27370 |
| gb:MN996531 | Organism:Severe | CTAAGTCTACTAAGTCTGAGAATAAATATTCTCAATTAGATGAAGAGCAACCAATGGAGATTG | 27369 |
| gb:MT066176 | Organism:Severe | CTAAGTCTACTAAGTCTGAGAATAAATATTCTCAATTAGATGAAGAGCAACCAATGGAGATTG | 27382 |
| gb:MT027064 | Organism:Severe | CTAAGTCTACTAAGTCTGAGAATAAATATTCTCAATTAGATGAAGAGCAACCAATGGAGATTG | 27382 |
| gb:MN994468 | Organism:Severe | CTAAGTCTACTAAGTCTGAGAATAAATATTCTCAATTAGATGAAGAGCAACCAATGGAGATTG | 27382 |
| gb:MT072688 | Organism:Severe | CTAAGTCTACTAAGTCTGAGAATAAATATTCTCAATTAGATGAAGAGCAACCAATGGAGATTG | 27367 |
| gb:MN996527 | Organism:Severe | CTAAGTCTACTAAGTCTGAGAATAAATATTCTCAATTAGATGAAGAGCAACCAATGGAGATTG | 27349 |
| gb:MT093631 | Organism:Severe | CTAAGTCTACTAAGTCTGAGAATAAATATTCTCAATTAGATGAAGAGCAACCAATGGAGATTG | 27420 |
| gb:MT106053 | Organism:Severe | CTAAGTCTACTAAGTCTGAGAATAAATATTCTCAATTAGATGAAGAGCAACCAATGGAGATTG | 27382 |
| gb:MT019533 | Organism:Severe | CTAAGTCTACTAAGTCTGAGAATAAATATTCTCAATTAGATGAAGAGCAACCAATGGAGATTG | 27382 |
| gb:MT019531 | Organism:Severe | CTAAGTCTACTAAGTCTGAGAATAAATATTCTCAATTAGATGAAGAGCAACCAATGGAGATTG | 27382 |
| gb:MN996528 | Organism:Severe | CTAAGTCTACTAAGTCTGAGAATAAATATTCTCAATTAGATGAAGAGCAACCAATGGAGATTG | 27382 |
| gb:MN996530 | Organism:Severe | CTAAGTCTACTAAGTCTGAGAATAAATATTCTCAATTAGATGAAGAGCAACCAATGGAGATTG | 27368 |
| gb:MN908947 | Organism:Severe | CTAAGTCTACTAAGTCTGAGAATAAATATTCTCAATTAGATGAAGAGCAACCAATGGAGATTG | 27382 |
| gb:MT019532 | Organism:Severe | CTAAGTCTACTAAGTCTGAGAATAAATATTCTCAATTAGATGAAGAGCAACCAATGGAGATTG | 27382 |

\*\*\*\*\*

|             |                 |                                                            |       |
|-------------|-----------------|------------------------------------------------------------|-------|
| gb:MT020781 | Organism:Severe | ATTAACGAACATGAAAATTATTCTTTTCTGGCACTGATAAAGTCTGCTACTTGTGAGC | 27430 |
| gb:MT007544 | Organism:Severe | ATTAACGAACATGAAAATTATTCTTTTCTGGCACTGATAAAGTCTGCTACTTGTGAGC | 27442 |
| gb:MN994467 | Organism:Severe | ATTAACGAACATGAAAATTATTCTTTTCTGGCACTGATAAAGTCTGCTACTTGTGAGC | 27442 |
| gb:MT044257 | Organism:Severe | ATTAACGAACATGAAAATTATTCTTTTCTGGCACTGATAAAGTCTGCTACTTGTGAGC | 27442 |
| gb:MT106054 | Organism:Severe | ATTAACGAACATGAAAATTATTCTTTTCTGGCACTGATAAAGTCTGCTACTTGTGAGC | 27442 |
| gb:MT049951 | Organism:Severe | ATTAACGAACATGAAAATTATTCTTTTCTGGCACTGATAAAGTCTGCTACTTGTGAGC | 27442 |
| gb:MN975262 | Organism:Severe | ATTAACGAACATGAAAATTATTCTTTTCTGGCACTGATAAAGTCTGCTACTTGTGAGC | 27442 |
| gb:MT106052 | Organism:Severe | ATTAACGAACATGAAAATTATTCTTTTCTGGCACTGATAAAGTCTGCTACTTGTGAGC | 27442 |
| gb:LC522975 | Organism:Severe | ATTAACGAACATGAAAATTATTCTTTTCTGGCACTGATAAAGTCTGCTACTTGTGAGC | 27439 |
| gb:LC522973 | Organism:Severe | ATTAACGAACATGAAAATTATTCTTTTCTGGCACTGATAAAGTCTGCTACTTGTGAGC | 27439 |
| gb:LC522974 | Organism:Severe | ATTAACGAACATGAAAATTATTCTTTTCTGGCACTGATAAAGTCTGCTACTTGTGAGC | 27439 |
| gb:MN985325 | Organism:Severe | ATTAACGAACATGAAAATTATTCTTTTCTGGCACTGATAAAGTCTGCTACTTGTGAGC | 27442 |
| gb:MT020881 | Organism:Severe | ATTAACGAACATGAAAATTATTCTTTTCTGGCACTGATAAAGTCTGCTACTTGTGAGC | 27442 |
| gb:MT020880 | Organism:Severe | ATTAACGAACATGAAAATTATTCTTTTCTGGCACTGATAAAGTCTGCTACTTGTGAGC | 27442 |
| gb:MT066175 | Organism:Severe | ATTAACGAACATGAAAATTATTCTTTTCTGGCACTGATAAAGTCTGCTACTTGTGAGC | 27442 |
| gb:MN997409 | Organism:Severe | ATTAACGAACATGAAAATTATTCTTTTCTGGCACTGATAAAGTCTGCTACTTGTGAGC | 27442 |
| gb:MN938384 | Organism:Severe | ATTAACGAACATGAAAATTATTCTTTTCTGGCACTGATAAAGTCTGCTACTTGTGAGC | 27410 |
| gb:MT044258 | Organism:Severe | ATTAACGAACATGAAAATTATTCTTTTCTGGCACTGATAAAGTCTGCTACTTGTGAGC | 27418 |
| gb:MT039890 | Organism:Severe | ATTAACGAACATGAAAATTATTCTTTTCTGGCACTGATAAAGTCTGCTACTTGTGAGC | 27442 |
| gb:MN988713 | Organism:Severe | ATTAACGAACATGAAAATTATTCTTTTCTGGCACTGATAAAGTCTGCTACTTGTGAGC | 27442 |
| gb:LC521925 | Organism:Severe | ATTAACGAACATGAAAATTATTCTTTTCTGGCACTGATAAAGTCTGCTACTTGTGAGC | 27415 |
| gb:MT093571 | Organism:Severe | ATTAACGAACATGAAAATTATTCTTTTCTGGCACTGATAAAGTCTGCTACTTGTGAGC | 27442 |
| gb:MT039887 | Organism:Severe | ATTAACGAACATGAAAATTATTCTTTTCTGGCACTGATAAAGTCTGCTACTTGTGAGC | 27439 |
| gb:MT019530 | Organism:Severe | ATTAACGAACATGAAAATTATTCTTTTCTGGCACTGATAAAGTCTGCTACTTGTGAGC | 27442 |
| gb:MT039888 | Organism:Severe | ATTAACGAACATGAAAATTATTCTTTTCTGGCACTGATAAAGTCTGCTACTTGTGAGC | 27442 |
| gb:LC522972 | Organism:Severe | ATTAACGAACATGAAAATTATTCTTTTCTGGCACTGATAAAGTCTGCTACTTGTGAGC | 27439 |
| gb:MT027063 | Organism:Severe | ATTAACGAACATGAAAATTATTCTTTTCTGGCACTGATAAAGTCTGCTACTTGTGAGC | 27442 |
| gb:MT027062 | Organism:Severe | ATTAACGAACATGAAAATTATTCTTTTCTGGCACTGATAAAGTCTGCTACTTGTGAGC | 27442 |
| gb:MT019529 | Organism:Severe | ATTAACGAACATGAAAATTATTCTTTTCTGGCACTGATAAAGTCTGCTACTTGTGAGC | 27442 |
| gb:MN996529 | Organism:Severe | ATTAACGAACATGAAAATTATTCTTTTCTGGCACTGATAAAGTCTGCTACTTGTGAGC | 27430 |
| gb:MN996531 | Organism:Severe | ATTAACGAACATGAAAATTATTCTTTTCTGGCACTGATAAAGTCTGCTACTTGTGAGC | 27429 |
| gb:MT066176 | Organism:Severe | ATTAACGAACATGAAAATTATTCTTTTCTGGCACTGATAAAGTCTGCTACTTGTGAGC | 27442 |
| gb:MT027064 | Organism:Severe | ATTAACGAACATGAAAATTATTCTTTTCTGGCACTGATAAAGTCTGCTACTTGTGAGC | 27442 |
| gb:MN994468 | Organism:Severe | ATTAACGAACATGAAAATTATTCTTTTCTGGCACTGATAAAGTCTGCTACTTGTGAGC | 27442 |

|             |                 |                                                            |       |
|-------------|-----------------|------------------------------------------------------------|-------|
| gb:MT072688 | Organism:Severe | ATTAACGAACATGAAAATTATTCTTTTCTTGGCACTGATAAACTCGCTACTTGTGAGC | 27427 |
| gb:MN996527 | Organism:Severe | ATTAACGAACATGAAAATTATTCTTTTCTTGGCACTGATAAACTCGCTACTTGTGAGC | 27409 |
| gb:MT093631 | Organism:Severe | ATTAACGAACATGAAAATTATTCTTTTCTTGGCACTGATAAACTCGCTACTTGTGAGC | 27480 |
| gb:MT106053 | Organism:Severe | ATTAACGAACATGAAAATTATTCTTTTCTTGGCACTGATAAACTCGCTACTTGTGAGC | 27442 |
| gb:MT019533 | Organism:Severe | ATTAACGAACATGAAAATTATTCTTTTCTTGGCACTGATAAACTCGCTACTTGTGAGC | 27442 |
| gb:MT019531 | Organism:Severe | ATTAACGAACATGAAAATTATTCTTTTCTTGGCACTGATAAACTCGCTACTTGTGAGC | 27442 |
| gb:MN996528 | Organism:Severe | ATTAACGAACATGAAAATTATTCTTTTCTTGGCACTGATAAACTCGCTACTTGTGAGC | 27442 |
| gb:MN996530 | Organism:Severe | ATTAACGAACATGAAAATTATTCTTTTCTTGGCACTGATAAACTCGCTACTTGTGAGC | 27428 |
| gb:MN908947 | Organism:Severe | ATTAACGAACATGAAAATTATTCTTTTCTTGGCACTGATAAACTCGCTACTTGTGAGC | 27442 |
| gb:MT019532 | Organism:Severe | ATTAACGAACATGAAAATTATTCTTTTCTTGGCACTGATAAACTCGCTACTTGTGAGC | 27442 |

\*\*\*\*\*

|             |                 |                                                              |       |
|-------------|-----------------|--------------------------------------------------------------|-------|
| gb:MT020781 | Organism:Severe | TTTATCACTACCAAGAGTGTGTTAGAGGTACAACAGTACTTTTAAAAGAACCTTGCTCTT | 27490 |
| gb:MT007544 | Organism:Severe | TTTATCACTACCAAGAGTGTGTTAGAGGTACAACAGTACTTTTAAAAGAACCTTGCTCTT | 27502 |
| gb:MN994467 | Organism:Severe | TTTATCACTACCAAGAGTGTGTTAGAGGTACAACAGTACTTTTAAAAGAACCTTGCTCTT | 27502 |
| gb:MT044257 | Organism:Severe | TTTATCACTACCAAGAGTGTGTTAGAGGTACAACAGTACTTTTAAAAGAACCTTGCTCTT | 27502 |
| gb:MT106054 | Organism:Severe | TTTATCACTACCAAGAGTGTGTTAGAGGTACAACAGTACTTTTAAAAGAACCTTGCTCTT | 27502 |
| gb:MT049951 | Organism:Severe | TTTATCACTACCAAGAGTGTGTTAGAGGTACAACAGTACTTTTAAAAGAACCTTGCTCTT | 27502 |
| gb:MN975262 | Organism:Severe | TTTATCACTACCAAGAGTGTGTTAGAGGTACAACAGTACTTTTAAAAGAACCTTGCTCTT | 27502 |
| gb:MT106052 | Organism:Severe | TTTATCACTACCAAGAGTGTGTTAGAGGTACAACAGTACTTTTAAAAGAACCTTGCTCTT | 27502 |
| gb:LC522975 | Organism:Severe | TTTATCACTACCAAGAGTGTGTTAGAGGTACAACAGTACTTTTAAAAGAACCTTGCTCTT | 27499 |
| gb:LC522973 | Organism:Severe | TTTATCACTACCAAGAGTGTGTTAGAGGTACAACAGTACTTTTAAAAGAACCTTGCTCTT | 27499 |
| gb:LC522974 | Organism:Severe | TTTATCACTACCAAGAGTGTGTTAGAGGTACAACAGTACTTTTAAAAGAACCTTGCTCTT | 27499 |
| gb:MN985325 | Organism:Severe | TTTATCACTACCAAGAGTGTGTTAGAGGTACAACAGTACTTTTAAAAGAACCTTGCTCTT | 27502 |
| gb:MT020881 | Organism:Severe | TTTATCACTACCAAGAGTGTGTTAGAGGTACAACAGTACTTTTAAAAGAACCTTGCTCTT | 27502 |
| gb:MT020880 | Organism:Severe | TTTATCACTACCAAGAGTGTGTTAGAGGTACAACAGTACTTTTAAAAGAACCTTGCTCTT | 27502 |
| gb:MT066175 | Organism:Severe | TTTATCACTACCAAGAGTGTGTTAGAGGTACAACAGTACTTTTAAAAGAACCTTGCTCTT | 27502 |
| gb:MN997409 | Organism:Severe | TTTATCACTACCAAGAGTGTGTTAGAGGTACAACAGTACTTTTAAAAGAACCTTGCTCTT | 27502 |
| gb:MN938384 | Organism:Severe | TTTATCACTACCAAGAGTGTGTTAGAGGTACAACAGTACTTTTAAAAGAACCTTGCTCTT | 27470 |
| gb:MT044258 | Organism:Severe | TTTATCACTACCAAGAGTGTGTTAGAGGTACAACAGTACTTTTAAAAGAACCTTGCTCTT | 27478 |
| gb:MT039890 | Organism:Severe | TTTATCACTACCAAGAGTGTGTTAGAGGTACAACAGTACTTTTAAAAGAACCTTGCTCTT | 27502 |
| gb:MN988713 | Organism:Severe | TTTATCACTACCAAGAGTGTGTTAGAGGTACAACAGTACTTTTAAAAGAACCTTGCTCTT | 27502 |
| gb:LC521925 | Organism:Severe | TTTATCACTACCAAGAGTGTGTTAGAGGTACAACAGTACTTTTAAAAGAACCTTGCTCTT | 27475 |
| gb:MT093571 | Organism:Severe | TTTATCACTACCAAGAGTGTGTTAGAGGTACAACAGTACTTTTAAAAGAACCTTGCTCTT | 27502 |
| gb:MT039887 | Organism:Severe | TTTATCACTACCAAGAGTGTGTTAGAGGTACAACAGTACTTTTAAAAGAACCTTGCTCTT | 27499 |
| gb:MT019530 | Organism:Severe | TTTATCACTACCAAGAGTGTGTTAGAGGTACAACAGTACTTTTAAAAGAACCTTGCTCTT | 27502 |
| gb:MT039888 | Organism:Severe | TTTATCACTACCAAGAGTGTGTTAGAGGTACAACAGTACTTTTAAAAGAACCTTGCTCTT | 27502 |
| gb:LC522972 | Organism:Severe | TTTATCACTACCAAGAGTGTGTTAGAGGTACAACAGTACTTTTAAAAGAACCTTGCTCTT | 27499 |
| gb:MT027063 | Organism:Severe | TTTATCACTACCAAGAGTGTGTTAGAGGTACAACAGTACTTTTAAAAGAACCTTGCTCTT | 27502 |
| gb:MT027062 | Organism:Severe | TTTATCACTACCAAGAGTGTGTTAGAGGTACAACAGTACTTTTAAAAGAACCTTGCTCTT | 27502 |
| gb:MT019529 | Organism:Severe | TTTATCACTACCAAGAGTGTGTTAGAGGTACAACAGTACTTTTAAAAGAACCTTGCTCTT | 27502 |
| gb:MN996529 | Organism:Severe | TTTATCACTACCAAGAGTGTGTTAGAGGTACAACAGTACTTTTAAAAGAACCTTGCTCTT | 27490 |
| gb:MN996531 | Organism:Severe | TTTATCACTACCAAGAGTGTGTTAGAGGTACAACAGTACTTTTAAAAGAACCTTGCTCTT | 27489 |
| gb:MT066176 | Organism:Severe | TTTATCACTACCAAGAGTGTGTTAGAGGTACAACAGTACTTTTAAAAGAACCTTGCTCTT | 27502 |
| gb:MT027064 | Organism:Severe | TTTATCACTACCAAGAGTGTGTTAGAGGTACAACAGTACTTTTAAAAGAACCTTGCTCTT | 27502 |
| gb:MN994468 | Organism:Severe | TTTATCACTACCAAGAGTGTGTTAGAGGTACAACAGTACTTTTAAAAGAACCTTGCTCTT | 27502 |
| gb:MT072688 | Organism:Severe | TTTATCACTACCAAGAGTGTGTTAGAGGTACAACAGTACTTTTAAAAGAACCTTGCTCTT | 27487 |
| gb:MN996527 | Organism:Severe | TTTATCACTACCAAGAGTGTGTTAGAGGTACAACAGTACTTTTAAAAGAACCTTGCTCTT | 27469 |
| gb:MT093631 | Organism:Severe | TTTATCACTACCAAGAGTGTGTTAGAGGTACAACAGTACTTTTAAAAGAACCTTGCTCTT | 27540 |
| gb:MT106053 | Organism:Severe | TTTATCACTACCAAGAGTGTGTTAGAGGTACAACAGTACTTTTAAAAGAACCTTGCTCTT | 27502 |
| gb:MT019533 | Organism:Severe | TTTATCACTACCAAGAGTGTGTTAGAGGTACAACAGTACTTTTAAAAGAACCTTGCTCTT | 27502 |
| gb:MT019531 | Organism:Severe | TTTATCACTACCAAGAGTGTGTTAGAGGTACAACAGTACTTTTAAAAGAACCTTGCTCTT | 27502 |
| gb:MN996528 | Organism:Severe | TTTATCACTACCAAGAGTGTGTTAGAGGTACAACAGTACTTTTAAAAGAACCTTGCTCTT | 27502 |
| gb:MN996530 | Organism:Severe | TTTATCACTACCAAGAGTGTGTTAGAGGTACAACAGTACTTTTAAAAGAACCTTGCTCTT | 27488 |
| gb:MN908947 | Organism:Severe | TTTATCACTACCAAGAGTGTGTTAGAGGTACAACAGTACTTTTAAAAGAACCTTGCTCTT | 27502 |
| gb:MT019532 | Organism:Severe | TTTATCACTACCAAGAGTGTGTTAGAGGTACAACAGTACTTTTAAAAGAACCTTGCTCTT | 27502 |

\*\*\*\*\*

|             |                 |                                                               |       |
|-------------|-----------------|---------------------------------------------------------------|-------|
| gb:MT020781 | Organism:Severe | CTGGAACATACGAGGGCAATTCACCATTTTCATCCTCTAGCTGATAACAAATTTGCACTGA | 27550 |
| gb:MT007544 | Organism:Severe | CTGGAACATACGAGGGCAATTCACCATTTTCATCCTCTAGCTGATAACAAATTTGCACTGA | 27562 |
| gb:MN994467 | Organism:Severe | CTGGAACATACGAGGGCAATTCACCATTTTCATCCTCTAGCTGATAACAAATTTGCACTGA | 27562 |
| gb:MT044257 | Organism:Severe | CTGGAACATACGAGGGCAATTCACCATTTTCATCCTCTAGCTGATAACAAATTTGCACTGA | 27562 |
| gb:MT106054 | Organism:Severe | CTGGAACATACGAGGGCAATTCACCATTTTCATCCTCTAGCTGATAACAAATTTGCACTGA | 27562 |
| gb:MT049951 | Organism:Severe | CTGGAACATACGAGGGCAATTCACCATTTTCATCCTCTAGCTGATAACAAATTTGCACTGA | 27562 |
| gb:MN975262 | Organism:Severe | CTGGAACATACGAGGGCAATTCACCATTTTCATCCTCTAGCTGATAACAAATTTGCACTGA | 27562 |

|             |                 |                                                             |       |
|-------------|-----------------|-------------------------------------------------------------|-------|
| gb:MT106052 | Organism:Severe | CTGGAACATACGAGGGCAATTACCATTTCATCCTCTAGCTGATAACAAATTTGCACTGA | 27562 |
| gb:LC522975 | Organism:Severe | CTGGAACATACGAGGGCAATTACCATTTCATCCTCTAGCTGATAACAAATTTGCACTGA | 27559 |
| gb:LC522973 | Organism:Severe | CTGGAACATACGAGGGCAATTACCATTTCATCCTCTAGCTGATAACAAATTTGCACTGA | 27559 |
| gb:LC522974 | Organism:Severe | CTGGAACATACGAGGGCAATTACCATTTCATCCTCTAGCTGATAACAAATTTGCACTGA | 27559 |
| gb:MN985325 | Organism:Severe | CTGGAACATACGAGGGCAATTACCATTTCATCCTCTAGCTGATAACAAATTTGCACTGA | 27562 |
| gb:MT020881 | Organism:Severe | CTGGAACATACGAGGGCAATTACCATTTCATCCTCTAGCTGATAACAAATTTGCACTGA | 27562 |
| gb:MT020880 | Organism:Severe | CTGGAACATACGAGGGCAATTACCATTTCATCCTCTAGCTGATAACAAATTTGCACTGA | 27562 |
| gb:MT066175 | Organism:Severe | CTGGAACATACGAGGGCAATTACCATTTCATCCTCTAGCTGATAACAAATTTGCACTGA | 27562 |
| gb:MN997409 | Organism:Severe | CTGGAACATACGAGGGCAATTACCATTTCATCCTCTAGCTGATAACAAATTTGCACTGA | 27562 |
| gb:MN938384 | Organism:Severe | CTGGAACATACGAGGGCAATTACCATTTCATCCTCTAGCTGATAACAAATTTGCACTGA | 27530 |
| gb:MT044258 | Organism:Severe | CTGGAACATACGAGGGCAATTACCATTTCATCCTCTAGCTGATAACAAATTTGCACTGA | 27538 |
| gb:MT039890 | Organism:Severe | CTGGAACATACGAGGGCAATTACCATTTCATCCTCTAGCTGATAACAAATTTGCACTGA | 27562 |
| gb:MN988713 | Organism:Severe | CTGGAACATACGAGGGCAATTACCATTTCATCCTCTAGCTGATAACAAATTTGCACTGA | 27562 |
| gb:LC521925 | Organism:Severe | CTGGAACATACGAGGGCAATTACCATTTCATCCTCTAGCTGATAACAAATTTGCACTGA | 27535 |
| gb:MT093571 | Organism:Severe | CTGGAACATACGAGGGCAATTACCATTTCATCCTCTAGCTGATAACAAATTTGCACTGA | 27562 |
| gb:MT039887 | Organism:Severe | CTGGAACATACGAGGGCAATTACCATTTCATCCTCTAGCTGATAACAAATTTGCACTGA | 27559 |
| gb:MT019530 | Organism:Severe | CTGGAACATACGAGGGCAATTACCATTTCATCCTCTAGCTGATAACAAATTTGCACTGA | 27562 |
| gb:MT039888 | Organism:Severe | CTGGAACATACGAGGGCAATTACCATTTCATCCTCTAGCTGATAACAAATTTGCACTGA | 27562 |
| gb:LC522972 | Organism:Severe | CTGGAACATACGAGGGCAATTACCATTTCATCCTCTAGCTGATAACAAATTTGCACTGA | 27559 |
| gb:MT027063 | Organism:Severe | CTGGAACATACGAGGGCAATTACCATTTCATCCTCTAGCTGATAACAAATTTGCACTGA | 27562 |
| gb:MT027062 | Organism:Severe | CTGGAACATACGAGGGCAATTACCATTTCATCCTCTAGCTGATAACAAATTTGCACTGA | 27562 |
| gb:MT019529 | Organism:Severe | CTGGAACATACGAGGGCAATTACCATTTCATCCTCTAGCTGATAACAAATTTGCACTGA | 27562 |
| gb:MN996529 | Organism:Severe | CTGGAACATACGAGGGCAATTACCATTTCATCCTCTAGCTGATAACAAATTTGCACTGA | 27550 |
| gb:MN996531 | Organism:Severe | CTGGAACATACGAGGGCAATTACCATTTCATCCTCTAGCTGATAACAAATTTGCACTGA | 27549 |
| gb:MT066176 | Organism:Severe | CTGGAACATACGAGGGCAATTACCATTTCATCCTCTAGCTGATAACAAATTTGCACTGA | 27562 |
| gb:MT027064 | Organism:Severe | CTGGAACATACGAGGGCAATTACCATTTCATCCTCTAGCTGATAACAAATTTGCACTGA | 27562 |
| gb:MN994468 | Organism:Severe | CTGGAACATACGAGGGCAATTACCATTTCATCCTCTAGCTGATAACAAATTTGCACTGA | 27562 |
| gb:MT072688 | Organism:Severe | CTGGAACATACGAGGGCAATTACCATTTCATCCTCTAGCTGATAACAAATTTGCACTGA | 27547 |
| gb:MN996527 | Organism:Severe | CTGGAACATACGAGGGCAATTACCATTTCATCCTCTAGCTGATAACAAATTTGCACTGA | 27529 |
| gb:MT093631 | Organism:Severe | CTGGAACATACGAGGGCAATTACCATTTCATCCTCTAGCTGATAACAAATTTGCACTGA | 27600 |
| gb:MT106053 | Organism:Severe | CTGGAACATACGAGGGCAATTACCATTTCATCCTCTAGCTGATAACAAATTTGCACTGA | 27562 |
| gb:MT019533 | Organism:Severe | CTGGAACATACGAGGGCAATTACCATTTCATCCTCTAGCTGATAACAAATTTGCACTGA | 27562 |
| gb:MT019531 | Organism:Severe | CTGGAACATACGAGGGCAATTACCATTTCATCCTCTAGCTGATAACAAATTTGCACTGA | 27562 |
| gb:MN996528 | Organism:Severe | CTGGAACATACGAGGGCAATTACCATTTCATCCTCTAGCTGATAACAAATTTGCACTGA | 27562 |
| gb:MN996530 | Organism:Severe | CTGGAACATACGAGGGCAATTACCATTTCATCCTCTAGCTGATAACAAATTTGCACTGA | 27548 |
| gb:MN908947 | Organism:Severe | CTGGAACATACGAGGGCAATTACCATTTCATCCTCTAGCTGATAACAAATTTGCACTGA | 27562 |
| gb:MT019532 | Organism:Severe | CTGGAACATACGAGGGCAATTACCATTTCATCCTCTAGCTGATAACAAATTTGCACTGA | 27562 |

\*\*\*\*\*

|             |                 |                                                               |       |
|-------------|-----------------|---------------------------------------------------------------|-------|
| gb:MT020781 | Organism:Severe | CTTGCTTTAGCACTCAATTTGCTTTTGCTTGTCCCTGACGGCGTAAAACACGTCTATCAGT | 27610 |
| gb:MT007544 | Organism:Severe | CTTGCTTTAGCACTCAATTTGCTTTTGCTTGTCCCTGACGGCGTAAAACACGTCTATCAGT | 27622 |
| gb:MN994467 | Organism:Severe | CTTGCTTTAGCACTCAATTTGCTTTTGCTTGTCCCTGACGGCGTAAAACACGTCTATCAGT | 27622 |
| gb:MT044257 | Organism:Severe | CTTGCTTTAGCACTCAATTTGCTTTTGCTTGTCCCTGACGGCGTAAAACACGTCTATCAGT | 27622 |
| gb:MT106054 | Organism:Severe | CTTGCTTTAGCACTCAATTTGCTTTTGCTTGTCCCTGACGGCGTAAAACACGTCTATCAGT | 27622 |
| gb:MT049951 | Organism:Severe | CTTGCTTTAGCACTCAATTTGCTTTTGCTTGTCCCTGACGGCGTAAAACACGTCTATCAGT | 27622 |
| gb:MN975262 | Organism:Severe | CTTGCTTTAGCACTCAATTTGCTTTTGCTTGTCCCTGACGGCGTAAAACACGTCTATCAGT | 27622 |
| gb:MT106052 | Organism:Severe | CTTGCTTTAGCACTCAATTTGCTTTTGCTTGTCCCTGACGGCGTAAAACACGTCTATCAGT | 27622 |
| gb:LC522975 | Organism:Severe | CTTGCTTTAGCACTCAATTTGCTTTTGCTTGTCCCTGACGGCGTAAAACACGTCTATCAGT | 27619 |
| gb:LC522973 | Organism:Severe | CTTGCTTTAGCACTCAATTTGCTTTTGCTTGTCCCTGACGGCGTAAAACACGTCTATCAGT | 27619 |
| gb:LC522974 | Organism:Severe | CTTGCTTTAGCACTCAATTTGCTTTTGCTTGTCCCTGACGGCGTAAAACACGTCTATCAGT | 27619 |
| gb:MN985325 | Organism:Severe | CTTGCTTTAGCACTCAATTTGCTTTTGCTTGTCCCTGACGGCGTAAAACACGTCTATCAGT | 27622 |
| gb:MT020881 | Organism:Severe | CTTGCTTTAGCACTCAATTTGCTTTTGCTTGTCCCTGACGGCGTAAAACACGTCTATCAGT | 27622 |
| gb:MT020880 | Organism:Severe | CTTGCTTTAGCACTCAATTTGCTTTTGCTTGTCCCTGACGGCGTAAAACACGTCTATCAGT | 27622 |
| gb:MT066175 | Organism:Severe | CTTGCTTTAGCACTCAATTTGCTTTTGCTTGTCCCTGACGGCGTAAAACACGTCTATCAGT | 27622 |
| gb:MN997409 | Organism:Severe | CTTGCTTTAGCACTCAATTTGCTTTTGCTTGTCCCTGACGGCGTAAAACACGTCTATCAGT | 27622 |
| gb:MN938384 | Organism:Severe | CTTGCTTTAGCACTCAATTTGCTTTTGCTTGTCCCTGACGGCGTAAAACACGTCTATCAGT | 27590 |
| gb:MT044258 | Organism:Severe | CTTGCTTTAGCACTCAATTTGCTTTTGCTTGTCCCTGACGGCGTAAAACACGTCTATCAGT | 27598 |
| gb:MT039890 | Organism:Severe | CTTGCTTTAGCACTCAATTTGCTTTTGCTTGTCCCTGACGGCGTAAAACACGTCTATCAGT | 27622 |
| gb:MN988713 | Organism:Severe | CTTGCTTTAGCACTCAATTTGCTTTTGCTTGTCCCTGACGGCGTAAAACACGTCTATCAGT | 27622 |
| gb:LC521925 | Organism:Severe | CTTGCTTTAGCACTCAATTTGCTTTTGCTTGTCCCTGACGGCGTAAAACACGTCTATCAGT | 27595 |
| gb:MT093571 | Organism:Severe | CTTGCTTTAGCACTCAATTTGCTTTTGCTTGTCCCTGACGGCGTAAAACACGTCTATCAGT | 27622 |
| gb:MT039887 | Organism:Severe | CTTGCTTTAGCACTCAATTTGCTTTTGCTTGTCCCTGACGGCGTAAAACACGTCTATCAGT | 27619 |
| gb:MT019530 | Organism:Severe | CTTGCTTTAGCACTCAATTTGCTTTTGCTTGTCCCTGACGGCGTAAAACACGTCTATCAGT | 27622 |
| gb:MT039888 | Organism:Severe | CTTGCTTTAGCACTCAATTTGCTTTTGCTTGTCCCTGACGGCGTAAAACACGTCTATCAGT | 27622 |
| gb:LC522972 | Organism:Severe | CTTGCTTTAGCACTCAATTTGCTTTTGCTTGTCCCTGACGGCGTAAAACACGTCTATCAGT | 27619 |





|             |                 |                                                                      |       |
|-------------|-----------------|----------------------------------------------------------------------|-------|
| gb:MT020781 | Organism:Severe | ACTCTCCAATTTTCTTATTGTTGCGGCAATAGTGTTTATAACACTTTGCTTCACACTCA          | 27730 |
| gb:MT007544 | Organism:Severe | ACTCTCCAATTTTCTTATTGTTGCGGCAATAGTGTTTATAACACTTTGCTTCACACTCA          | 27742 |
| gb:MN994467 | Organism:Severe | ACTCTCCAATTTTCTTATTGTTGCGGCAATAGTGTTTATAACACTTTGCTTCACACTCA          | 27742 |
| gb:MT044257 | Organism:Severe | ACTCTCCAATTTTCTTATTGTTGCGGCAATAGTGTTTATAACACTTTGCTTCACACTCA          | 27742 |
| gb:MT106054 | Organism:Severe | ACTCTCCAATTTTCTTATTGTTGCGGCAATAGTGTTTATAACACTTTGCTTCACACTCA          | 27742 |
| gb:MT049951 | Organism:Severe | ACTCTCCAATTTTCTTATTGTTGCGGCAATAGTGTTTATAACACTTTGCTTCACACTCA          | 27742 |
| gb:MN975262 | Organism:Severe | ACTCTCCAATTTTCTTATTGTTGCGGCAATAGTGTTTATAACACTTTGCTTCACACTCA          | 27742 |
| gb:MT106052 | Organism:Severe | ACTCTCCAATTTTCTTATTGTTGCGGCAATAGTGTTTATAACACTTTGCTTCACACTCA          | 27742 |
| gb:LC522975 | Organism:Severe | ACTCTCCAATTTTCTTATTGTTGCGGCAATAGTGTTTATAACACTTTGCTTCACACTCA          | 27739 |
| gb:LC522973 | Organism:Severe | ACTCTCCAATTTTCTTATTGTTGCGGCAATAGTGTTTATAACACTTTGCTTCACACTCA          | 27739 |
| gb:LC522974 | Organism:Severe | ACTCTCCAATTTTCTTATTGTTGCGGCAATAGTGTTTATAACACTTTGCTTCACACTCA          | 27739 |
| gb:MN985325 | Organism:Severe | ACTCTCCAATTTTCTTATTGTTGCGGCAATAGTGTTTATAACACTTTGCTTCACACTCA          | 27742 |
| gb:MT020881 | Organism:Severe | ACTCTCCAATTTTCTTATTGTTGCGGCAATAGTGTTTATAACACTTTGCTTCACACTCA          | 27742 |
| gb:MT020880 | Organism:Severe | ACTCTCCAATTTTCTTATTGTTGCGGCAATAGTGTTTATAACACTTTGCTTCACACTCA          | 27742 |
| gb:MT066175 | Organism:Severe | ACTCTCCAATTTTCTTATTGTTGCGGCAATAGTGTTTATAACACTTTGCTTCACACTCA          | 27742 |
| gb:MN997409 | Organism:Severe | ACTCTCCAATTTTCTTATTGTTGCGGCAATAGTGTTTATAACACTTTGCTTCACACTCA          | 27742 |
| gb:MN938384 | Organism:Severe | ACTCTCCAATTTTCTTATTGTTGCGGCAATAGTGTTTATAACACTTTGCTTCACACTCA          | 27710 |
| gb:MT044258 | Organism:Severe | ACTCTCCAATTTTCTTATTGTTGCGGCAATAGTGTTTATAACACTTTGCTTCACACTCA          | 27718 |
| gb:MT039890 | Organism:Severe | ACTCTCCAATTTTCTTATTGTTGCGGCAATAGTGTTTATAACACTTTGCTTCACACTCA          | 27742 |
| gb:MN988713 | Organism:Severe | ACTCTCCAATTTTCTTATTGTTGCGGCAATAGTGTTTATAACACTTTGCTTCACACTCA          | 27742 |
| gb:LC521925 | Organism:Severe | ACTCTCCAATTTTCTTATTGTTGCGGCAATAGTGTTTATAACACTTTGCTTCACACTCA          | 27715 |
| gb:MT093571 | Organism:Severe | ACTCTCCAATTTTCTTATTGTTGCGGCAATAGTGTTTATAACACTTTGCTTCACACTCA          | 27742 |
| gb:MT039887 | Organism:Severe | ACTCTCCAATTTTCTTATTGTTGCGGCAATAGTGTTTATAACACTTTGCTTCACACTCA          | 27739 |
| gb:MT019530 | Organism:Severe | ACTCTCCAATTTTCTTATTGTTGCGGCAATAGTGTTTATAACACTTTGCTTCACACTCA          | 27742 |
| gb:MT039888 | Organism:Severe | ACTCTCCAATTTTCTTATTGTTGCGGCAATAGTGTTTATAACACTTTGCTTCACACTCA          | 27742 |
| gb:LC522972 | Organism:Severe | ACTCTCCAATTTTCTTATTGTTGCGGCAATAGTGTTTATAACACTTTGCTTCACACTCA          | 27739 |
| gb:MT027063 | Organism:Severe | ACTCTCCAATTTTCTTATTGTTGCGGCAATAGTGTTTATAACACTTTGCTTCACACTCA          | 27742 |
| gb:MT027062 | Organism:Severe | ACTCTCCAATTTTCTTATTGTTGCGGCAATAGTGTTTATAACACTTTGCTTCACACTCA          | 27742 |
| gb:MT019529 | Organism:Severe | ACTCTCCAATTTTCTTATTGTTGCGGCAATAGTGTTTATAACACTTTGCTTCACACTCA          | 27742 |
| gb:MN996529 | Organism:Severe | ACTCTCCAATTTTCTTATTGTTGCGGCAATAGTGTTTATAACACTTTGCTTCACACTCA          | 27730 |
| gb:MN996531 | Organism:Severe | ACTCTCCAATTTTCTTATTGTTGCGGCAATAGTGTTTATAACACTTTGCTTCACACTCA          | 27729 |
| gb:MT066176 | Organism:Severe | ACTCTCCAATTTTCTTATTGTTGCGGCAATAGTGTTTATAACACTTTGCTTCACACTCA          | 27742 |
| gb:MT027064 | Organism:Severe | ACTCTCCAATTTTCTTATTGTTGCGGCAATAGTGTTTATAACACTTTGCTTCACACTCA          | 27742 |
| gb:MN994468 | Organism:Severe | ACTCTCCAATTTTCTTATTGTTGCGGCAATAGTGTTTATAACACTTTGCTTCACACTCA          | 27742 |
| gb:MT072688 | Organism:Severe | ACTCTCCAATTTTCTTATTGTTGCGGCAATAGTGTTTATAACACTTTGCTTCACACTCA          | 27727 |
| gb:MN996527 | Organism:Severe | ACTCTCCAATTTTCTTATTGTTGCGGCAATAGTGTTTATAACACTTTGCTTCACACTCA          | 27709 |
| gb:MT093631 | Organism:Severe | ACTCTCCAATTTTCTTATTGTTGCGGCAATAGTGTTTATAACACTTTGCTTCACACTCA          | 27780 |
| gb:MT106053 | Organism:Severe | ACTCTCCAATTTTCTTATTGTTGCGGCAATAGTGTTTATAACACTTTGCTTCACACTCA          | 27742 |
| gb:MT019533 | Organism:Severe | ACTCTCCAATTTTCTTATTGTTGCGGCAATAGTGTTTATAACACTTTGCTTCACACTCA          | 27742 |
| gb:MT019531 | Organism:Severe | ACTCTCCAATTTTCTTATTGTTGCGGCAATAGTGTTTATAACACTTTGCTTCACACTCA          | 27742 |
| gb:MN996528 | Organism:Severe | ACTCTCCAATTTTCTTATTGTTGCGGCAATAGTGTTTATAACACTTTGCTTCACACTCA          | 27742 |
| gb:MN996530 | Organism:Severe | ACTCTCCAATTTTCTTATTGTTGCGGCAATAGTGTTTATAACACTTTGCTTCACACTCA          | 27728 |
| gb:MN908947 | Organism:Severe | ACTCTCCAATTTTCTTATTGTTGCGGCAATAGTGTTTATAACACTTTGCTTCACACTCA          | 27742 |
| gb:MT019532 | Organism:Severe | ACTCTCCAATTTTCTTATTGTTGCGGCAATAGTGTTTATAACACTTTGCTTCACACTCA<br>***** | 27742 |

|             |                 |                                                              |       |
|-------------|-----------------|--------------------------------------------------------------|-------|
| gb:MT020781 | Organism:Severe | AAAGAAAGACAGAATGATTGAACTTTCATTAATTGACTTCTATTTGTGCTTTTTAGCCTT | 27790 |
| gb:MT007544 | Organism:Severe | AAAGAAAGACAGAATGATTGAACTTTCATTAATTGACTTCTATTTGTGCTTTTTAGCCTT | 27802 |
| gb:MN994467 | Organism:Severe | AAAGAAAGACAGAATGATTGAACTTTCATTAATTGACTTCTATTTGTGCTTTTTAGCCTT | 27802 |
| gb:MT044257 | Organism:Severe | AAAGAAAGACAGAATGATTGAACTTTCATTAATTGACTTCTATTTGTGCTTTTTAGCCTT | 27802 |
| gb:MT106054 | Organism:Severe | AAAGAAAGACAGAATGATTGAACTTTCATTAATTGACTTCTATTTGTGCTTTTTAGCCTT | 27802 |
| gb:MT049951 | Organism:Severe | AAAGAAAGACAGAATGATTGAACTTTCATTAATTGACTTCTATTTGTGCTTTTTAGCCTT | 27802 |
| gb:MN975262 | Organism:Severe | AAAGAAAGACAGAATGATTGAACTTTCATTAATTGACTTCTATTTGTGCTTTTTAGCCTT | 27802 |
| gb:MT106052 | Organism:Severe | AAAGAAAGACAGAATGATTGAACTTTCATTAATTGACTTCTATTTGTGCTTTTTAGCCTT | 27802 |
| gb:LC522975 | Organism:Severe | AAAGAAAGACAGAATGATTGAACTTTCATTAATTGACTTCTATTTGTGCTTTTTAGCCTT | 27799 |
| gb:LC522973 | Organism:Severe | AAAGAAAGACAGAATGATTGAACTTTCATTAATTGACTTCTATTTGTGCTTTTTAGCCTT | 27799 |
| gb:LC522974 | Organism:Severe | AAAGAAAGACAGAATGATTGAACTTTCATTAATTGACTTCTATTTGTGCTTTTTAGCCTT | 27799 |
| gb:MN985325 | Organism:Severe | AAAGAAAGACAGAATGATTGAACTTTCATTAATTGACTTCTATTTGTGCTTTTTAGCCTT | 27802 |
| gb:MT020881 | Organism:Severe | AAAGAAAGACAGAATGATTGAACTTTCATTAATTGACTTCTATTTGTGCTTTTTAGCCTT | 27802 |
| gb:MT020880 | Organism:Severe | AAAGAAAGACAGAATGATTGAACTTTCATTAATTGACTTCTATTTGTGCTTTTTAGCCTT | 27802 |
| gb:MT066175 | Organism:Severe | AAAGAAAGACAGAATGATTGAACTTTCATTAATTGACTTCTATTTGTGCTTTTTAGCCTT | 27802 |
| gb:MN997409 | Organism:Severe | AAAGAAAGACAGAATGATTGAACTTTCATTAATTGACTTCTATTTGTGCTTTTTAGCCTT | 27802 |
| gb:MN938384 | Organism:Severe | AAAGAAAGACAGAATGATTGAACTTTCATTAATTGACTTCTATTTGTGCTTTTTAGCCTT | 27770 |
| gb:MT044258 | Organism:Severe | AAAGAAAGACAGAATGATTGAACTTTCATTAATTGACTTCTATTTGTGCTTTTTAGCCTT | 27778 |

|             |                 |                                                              |       |
|-------------|-----------------|--------------------------------------------------------------|-------|
| gb:MT039890 | Organism:Severe | AAAGAAAGACAGAATGATTGAACTTTCATTAATTGACTTCTATTTGTGCTTTTTAGCCTT | 27802 |
| gb:MN988713 | Organism:Severe | AAAGAAAGACAGAATGATTGAACTTTCATTAATTGACTTCTATTTGTGCTTTTTAGCCTT | 27802 |
| gb:LC521925 | Organism:Severe | AAAGAAAGACAGAATGATTGAACTTTCATTAATTGACTTCTATTTGTGCTTTTTAGCCTT | 27775 |
| gb:MT093571 | Organism:Severe | AAAGAAAGACAGAATGATTGAACTTTCATTAATTGACTTCTATTTGTGCTTTTTAGCCTT | 27802 |
| gb:MT039887 | Organism:Severe | AAAGAAAGACAGAATGATTGAACTTTCATTAATTGACTTCTATTTGTGCTTTTTAGCCTT | 27799 |
| gb:MT019530 | Organism:Severe | AAAGAAAGACAGAATGATTGAACTTTCATTAATTGACTTCTATTTGTGCTTTTTAGCCTT | 27802 |
| gb:MT039888 | Organism:Severe | AAAGAAAGACAGAATGATTGAACTTTCATTAATTGACTTCTATTTGTGCTTTTTAGCCTT | 27802 |
| gb:LC522972 | Organism:Severe | AAAGAAAGACAGAATGATTGAACTTTCATTAATTGACTTCTATTTGTGCTTTTTAGCCTT | 27799 |
| gb:MT027063 | Organism:Severe | AAAGAAAGACAGAATGATTGAACTTTCATTAATTGACTTCTATTTGTGCTTTTTAGCCTT | 27802 |
| gb:MT027062 | Organism:Severe | AAAGAAAGACAGAATGATTGAACTTTCATTAATTGACTTCTATTTGTGCTTTTTAGCCTT | 27802 |
| gb:MT019529 | Organism:Severe | AAAGAAAGACAGAATGATTGAACTTTCATTAATTGACTTCTATTTGTGCTTTTTAGCCTT | 27802 |
| gb:MN996529 | Organism:Severe | AAAGAAAGACAGAATGATTGAACTTTCATTAATTGACTTCTATTTGTGCTTTTTAGCCTT | 27790 |
| gb:MN996531 | Organism:Severe | AAAGAAAGACAGAATGATTGAACTTTCATTAATTGACTTCTATTTGTGCTTTTTAGCCTT | 27789 |
| gb:MT066176 | Organism:Severe | AAAGAAAGACAGAATGATTGAACTTTCATTAATTGACTTCTATTTGTGCTTTTTAGCCTT | 27802 |
| gb:MT027064 | Organism:Severe | AAAGAAAGACAGAATGATTGAACTTTCATTAATTGACTTCTATTTGTGCTTTTTAGCCTT | 27802 |
| gb:MN994468 | Organism:Severe | AAAGAAAGACAGAATGATTGAACTTTCATTAATTGACTTCTATTTGTGCTTTTTAGCCTT | 27802 |
| gb:MT072688 | Organism:Severe | AAAGAAAGACAGAATGATTGAACTTTCATTAATTGACTTCTATTTGTGCTTTTTAGCCTT | 27787 |
| gb:MN996527 | Organism:Severe | AAAGAAAGACAGAATGATTGAACTTTCATTAATTGACTTCTATTTGTGCTTTTTAGCCTT | 27769 |
| gb:MT093631 | Organism:Severe | AAAGAAAGACAGAATGATTGAACTTTCATTAATTGACTTCTATTTGTGCTTTTTAGCCTT | 27840 |
| gb:MT106053 | Organism:Severe | AAAGAAAGACAGAATGATTGAACTTTCATTAATTGACTTCTATTTGTGCTTTTTAGCCTT | 27802 |
| gb:MT019533 | Organism:Severe | AAAGAAAGACAGAATGATTGAACTTTCATTAATTGACTTCTATTTGTGCTTTTTAGCCTT | 27802 |
| gb:MT019531 | Organism:Severe | AAAGAAAGACAGAATGATTGAACTTTCATTAATTGACTTCTATTTGTGCTTTTTAGCCTT | 27802 |
| gb:MN996528 | Organism:Severe | AAAGAAAGACAGAATGATTGAACTTTCATTAATTGACTTCTATTTGTGCTTTTTAGCCTT | 27802 |
| gb:MN996530 | Organism:Severe | AAAGAAAGACAGAATGATTGAACTTTCATTAATTGACTTCTATTTGTGCTTTTTAGCCTT | 27788 |
| gb:MN908947 | Organism:Severe | AAAGAAAGACAGAATGATTGAACTTTCATTAATTGACTTCTATTTGTGCTTTTTAGCCTT | 27802 |
| gb:MT019532 | Organism:Severe | AAAGAAAGACAGAATGATTGAACTTTCATTAATTGACTTCTATTTGTGCTTTTTAGCCTT | 27802 |

\*\*\*\*\*

|             |                 |                                                       |       |
|-------------|-----------------|-------------------------------------------------------|-------|
| gb:MT020781 | Organism:Severe | TCTGCTATTCCTTGTTTTAATTATGCTTATTATCTTTGGTTCTCACTGCAAGA | 27850 |
| gb:MT007544 | Organism:Severe | TCTGCTATTCCTTGTTTTAATTATGCTTATTATCTTTGGTTCTCACTGCAAGA | 27862 |
| gb:MN994467 | Organism:Severe | TCTGCTATTCCTTGTTTTAATTATGCTTATTATCTTTGGTTCTCACTGCAAGA | 27862 |
| gb:MT044257 | Organism:Severe | TCTGCTATTCCTTGTTTTAATTATGCTTATTATCTTTGGTTCTCACTGCAAGA | 27862 |
| gb:MT106054 | Organism:Severe | TCTGCTATTCCTTGTTTTAATTATGCTTATTATCTTTGGTTCTCACTGCAAGA | 27862 |
| gb:MT049951 | Organism:Severe | TCTGCTATTCCTTGTTTTAATTATGCTTATTATCTTTGGTTCTCACTGCAAGA | 27862 |
| gb:MN975262 | Organism:Severe | TCTGCTATTCCTTGTTTTAATTATGCTTATTATCTTTGGTTCTCACTGCAAGA | 27862 |
| gb:MT106052 | Organism:Severe | TCTGCTATTCCTTGTTTTAATTATGCTTATTATCTTTGGTTCTCACTGCAAGA | 27862 |
| gb:LC522975 | Organism:Severe | TCTGCTATTCCTTGTTTTAATTATGCTTATTATCTTTGGTTCTCACTGCAAGA | 27859 |
| gb:LC522973 | Organism:Severe | TCTGCTATTCCTTGTTTTAATTATGCTTATTATCTTTGGTTCTCACTGCAAGA | 27859 |
| gb:LC522974 | Organism:Severe | TCTGCTATTCCTTGTTTTAATTATGCTTATTATCTTTGGTTCTCACTGCAAGA | 27859 |
| gb:MN985325 | Organism:Severe | TCTGCTATTCCTTGTTTTAATTATGCTTATTATCTTTGGTTCTCACTGCAAGA | 27862 |
| gb:MT020881 | Organism:Severe | TCTGCTATTCCTTGTTTTAATTATGCTTATTATCTTTGGTTCTCACTGCAAGA | 27862 |
| gb:MT020880 | Organism:Severe | TCTGCTATTCCTTGTTTTAATTATGCTTATTATCTTTGGTTCTCACTGCAAGA | 27862 |
| gb:MT066175 | Organism:Severe | TCTGCTATTCCTTGTTTTAATTATGCTTATTATCTTTGGTTCTCACTGCAAGA | 27862 |
| gb:MN997409 | Organism:Severe | TCTGCTATTCCTTGTTTTAATTATGCTTATTATCTTTGGTTCTCACTGCAAGA | 27862 |
| gb:MN938384 | Organism:Severe | TCTGCTATTCCTTGTTTTAATTATGCTTATTATCTTTGGTTCTCACTGCAAGA | 27830 |
| gb:MT044258 | Organism:Severe | TCTGCTATTCCTTGTTTTAATTATGCTTATTATCTTTGGTTCTCACTGCAAGA | 27838 |
| gb:MT039890 | Organism:Severe | TCTGCTATTCCTTGTTTTAATTATGCTTATTATCTTTGGTTCTCACTGCAAGA | 27862 |
| gb:MN988713 | Organism:Severe | TCTGCTATTCCTTGTTTTAATTATGCTTATTATCTTTGGTTCTCACTGCAAGA | 27862 |
| gb:LC521925 | Organism:Severe | TCTGCTATTCCTTGTTTTAATTATGCTTATTATCTTTGGTTCTCACTGCAAGA | 27835 |
| gb:MT093571 | Organism:Severe | TCTGCTATTCCTTGTTTTAATTATGCTTATTATCTTTGGTTCTCACTGCAAGA | 27862 |
| gb:MT039887 | Organism:Severe | TCTGCTATTCCTTGTTTTAATTATGCTTATTATCTTTGGTTCTCACTGCAAGA | 27859 |
| gb:MT019530 | Organism:Severe | TCTGCTATTCCTTGTTTTAATTATGCTTATTATCTTTGGTTCTCACTGCAAGA | 27862 |
| gb:MT039888 | Organism:Severe | TCTGCTATTCCTTGTTTTAATTATGCTTATTATCTTTGGTTCTCACTGCAAGA | 27862 |
| gb:LC522972 | Organism:Severe | TCTGCTATTCCTTGTTTTAATTATGCTTATTATCTTTGGTTCTCACTGCAAGA | 27859 |
| gb:MT027063 | Organism:Severe | TCTGCTATTCCTTGTTTTAATTATGCTTATTATCTTTGGTTCTCACTGCAAGA | 27862 |
| gb:MT027062 | Organism:Severe | TCTGCTATTCCTTGTTTTAATTATGCTTATTATCTTTGGTTCTCACTGCAAGA | 27862 |
| gb:MT019529 | Organism:Severe | TCTGCTATTCCTTGTTTTAATTATGCTTATTATCTTTGGTTCTCACTGCAAGA | 27862 |
| gb:MN996529 | Organism:Severe | TCTGCTATTCCTTGTTTTAATTATGCTTATTATCTTTGGTTCTCACTGCAAGA | 27850 |
| gb:MN996531 | Organism:Severe | TCTGCTATTCCTTGTTTTAATTATGCTTATTATCTTTGGTTCTCACTGCAAGA | 27849 |
| gb:MT066176 | Organism:Severe | TCTGCTATTCCTTGTTTTAATTATGCTTATTATCTTTGGTTCTCACTGCAAGA | 27862 |
| gb:MT027064 | Organism:Severe | TCTGCTATTCCTTGTTTTAATTATGCTTATTATCTTTGGTTCTCACTGCAAGA | 27862 |
| gb:MN994468 | Organism:Severe | TCTGCTATTCCTTGTTTTAATTATGCTTATTATCTTTGGTTCTCACTGCAAGA | 27862 |
| gb:MT072688 | Organism:Severe | TCTGCTATTCCTTGTTTTAATTATGCTTATTATCTTTGGTTCTCACTGCAAGA | 27847 |
| gb:MN996527 | Organism:Severe | TCTGCTATTCCTTGTTTTAATTATGCTTATTATCTTTGGTTCTCACTGCAAGA | 27829 |
| gb:MT093631 | Organism:Severe | TCTGCTATTCCTTGTTTTAATTATGCTTATTATCTTTGGTTCTCACTGCAAGA | 27900 |

|             |                 |                                                            |       |
|-------------|-----------------|------------------------------------------------------------|-------|
| gb:MT106053 | Organism:Severe | TCTGCTATTCCTTGTTTAATTATGCTTATTATCTTTTGTTTCTCACTTGAACGCAAGA | 27862 |
| gb:MT019533 | Organism:Severe | TCTGCTATTCCTTGTTTAATTATGCTTATTATCTTTTGTTTCTCACTTGAACGCAAGA | 27862 |
| gb:MT019531 | Organism:Severe | TCTGCTATTCCTTGTTTAATTATGCTTATTATCTTTTGTTTCTCACTTGAACGCAAGA | 27862 |
| gb:MN996528 | Organism:Severe | TCTGCTATTCCTTGTTTAATTATGCTTATTATCTTTTGTTTCTCACTTGAACGCAAGA | 27862 |
| gb:MN996530 | Organism:Severe | TCTGCTATTCCTTGTTTAATTATGCTTATTATCTTTTGTTTCTCACTTGAACGCAAGA | 27848 |
| gb:MN908947 | Organism:Severe | TCTGCTATTCCTTGTTTAATTATGCTTATTATCTTTTGTTTCTCACTTGAACGCAAGA | 27862 |
| gb:MT019532 | Organism:Severe | TCTGCTATTCCTTGTTTAATTATGCTTATTATCTTTTGTTTCTCACTTGAACGCAAGA | 27862 |

\*\*\*\*\*

|             |                 |                                                             |       |
|-------------|-----------------|-------------------------------------------------------------|-------|
| gb:MT020781 | Organism:Severe | TCATAATGAAACTTGTACGCCTAAACGAACATGAAATTTCTTGTTTTCTTAGGAATCAT | 27910 |
| gb:MT007544 | Organism:Severe | TCATAATGAAACTTGTACGCCTAAACGAACATGAAATTTCTTGTTTTCTTAGGAATCAT | 27922 |
| gb:MN994467 | Organism:Severe | TCATAATGAAACTTGTACGCCTAAACGAACATGAAATTTCTTGTTTTCTTAGGAATCAT | 27922 |
| gb:MT044257 | Organism:Severe | TCATAATGAAACTTGTACGCCTAAACGAACATGAAATTTCTTGTTTTCTTAGGAATCAT | 27922 |
| gb:MT106054 | Organism:Severe | TCATAATGAAACTTGTACGCCTAAACGAACATGAAATTTCTTGTTTTCTTAGGAATCAT | 27922 |
| gb:MT049951 | Organism:Severe | TCATAATGAAACTTGTACGCCTAAACGAACATGAAATTTCTTGTTTTCTTAGGAATCAT | 27922 |
| gb:MN975262 | Organism:Severe | TCATAATGAAACTTGTACGCCTAAACGAACATGAAATTTCTTGTTTTCTTAGGAATCAT | 27922 |
| gb:MT106052 | Organism:Severe | TCATAATGAAACTTGTACGCCTAAACGAACATGAAATTTCTTGTTTTCTTAGGAATCAT | 27922 |
| gb:LC522975 | Organism:Severe | TCATAATGAAACTTGTACGCCTAAACGAACATGAAATTTCTTGTTTTCTTAGGAATCAT | 27919 |
| gb:LC522973 | Organism:Severe | TCATAATGAAACTTGTACGCCTAAACGAACATGAAATTTCTTGTTTTCTTAGGAATCAT | 27919 |
| gb:LC522974 | Organism:Severe | TCATAATGAAACTTGTACGCCTAAACGAACATGAAATTTCTTGTTTTCTTAGGAATCAT | 27919 |
| gb:MN985325 | Organism:Severe | TCATAATGAAACTTGTACGCCTAAACGAACATGAAATTTCTTGTTTTCTTAGGAATCAT | 27922 |
| gb:MT020881 | Organism:Severe | TCATAATGAAACTTGTACGCCTAAACGAACATGAAATTTCTTGTTTTCTTAGGAATCAT | 27922 |
| gb:MT020880 | Organism:Severe | TCATAATGAAACTTGTACGCCTAAACGAACATGAAATTTCTTGTTTTCTTAGGAATCAT | 27922 |
| gb:MT066175 | Organism:Severe | TCATAATGAAACTTGTACGCCTAAACGAACATGAAATTTCTTGTTTTCTTAGGAATCAT | 27922 |
| gb:MN997409 | Organism:Severe | TCATAATGAAACTTGTACGCCTAAACGAACATGAAATTTCTTGTTTTCTTAGGAATCAT | 27922 |
| gb:MN938384 | Organism:Severe | TCATAATGAAACTTGTACGCCTAAACGAACATGAAATTTCTTGTTTTCTTAGGAATCAT | 27890 |
| gb:MT044258 | Organism:Severe | TCATAATGAAACTTGTACGCCTAAACGAACATGAAATTTCTTGTTTTCTTAGGAATCAT | 27898 |
| gb:MT039890 | Organism:Severe | TCATAATGAAACTTGTACGCCTAAACGAACATGAAATTTCTTGTTTTCTTAGGAATCAT | 27922 |
| gb:MN988713 | Organism:Severe | TCATAATGAAACTTGTACGCCTAAACGAACATGAAATTTCTTGTTTTCTTAGGAATCAT | 27922 |
| gb:LC521925 | Organism:Severe | TCATAATGAAACTTGTACGCCTAAACGAACATGAAATTTCTTGTTTTCTTAGGAATCAT | 27895 |
| gb:MT093571 | Organism:Severe | TCATAATGAAACTTGTACGCCTAAACGAACATGAAATTTCTTGTTTTCTTAGGAATCAT | 27922 |
| gb:MT039887 | Organism:Severe | TCATAATGAAACTTGTACGCCTAAACGAACATGAAATTTCTTGTTTTCTTAGGAATCAT | 27919 |
| gb:MT019530 | Organism:Severe | TCATAATGAAACTTGTACGCCTAAACGAACATGAAATTTCTTGTTTTCTTAGGAATCAT | 27922 |
| gb:MT039888 | Organism:Severe | TCATAATGAAACTTGTACGCCTAAACGAACATGAAATTTCTTGTTTTCTTAGGAATCAT | 27922 |
| gb:LC522972 | Organism:Severe | TCATAATGAAACTTGTACGCCTAAACGAACATGAAATTTCTTGTTTTCTTAGGAATCAT | 27919 |
| gb:MT027063 | Organism:Severe | TCATAATGAAACTTGTACGCCTAAACGAACATGAAATTTCTTGTTTTCTTAGGAATCAT | 27922 |
| gb:MT027062 | Organism:Severe | TCATAATGAAACTTGTACGCCTAAACGAACATGAAATTTCTTGTTTTCTTAGGAATCAT | 27922 |
| gb:MT019529 | Organism:Severe | TCATAATGAAACTTGTACGCCTAAACGAACATGAAATTTCTTGTTTTCTTAGGAATCAT | 27922 |
| gb:MN996529 | Organism:Severe | TCATAATGAAACTTGTACGCCTAAACGAACATGAAATTTCTTGTTTTCTTAGGAATCAT | 27910 |
| gb:MN996531 | Organism:Severe | TCATAATGAAACTTGTACGCCTAAACGAACATGAAATTTCTTGTTTTCTTAGGAATCAT | 27909 |
| gb:MT066176 | Organism:Severe | TCATAATGAAACTTGTACGCCTAAACGAACATGAAATTTCTTGTTTTCTTAGGAATCAT | 27922 |
| gb:MT027064 | Organism:Severe | TCATAATGAAACTTGTACGCCTAAACGAACATGAAATTTCTTGTTTTCTTAGGAATCAT | 27922 |
| gb:MN994468 | Organism:Severe | TCATAATGAAACTTGTACGCCTAAACGAACATGAAATTTCTTGTTTTCTTAGGAATCAT | 27922 |
| gb:MT072688 | Organism:Severe | TCATAATGAAACTTGTACGCCTAAACGAACATGAAATTTCTTGTTTTCTTAGGAATCAT | 27907 |
| gb:MN996527 | Organism:Severe | TCATAATGAAACTTGTACGCCTAAACGAACATGAAATTTCTTGTTTTCTTAGGAATCAT | 27889 |
| gb:MT093631 | Organism:Severe | TCATAATGAAACTTGTACGCCTAAACGAACATGAAATTTCTTGTTTTCTTAGGAATCAT | 27960 |
| gb:MT106053 | Organism:Severe | TCATAATGAAACTTGTACGCCTAAACGAACATGAAATTTCTTGTTTTCTTAGGAATCAT | 27922 |
| gb:MT019533 | Organism:Severe | TCATAATGAAACTTGTACGCCTAAACGAACATGAAATTTCTTGTTTTCTTAGGAATCAT | 27922 |
| gb:MT019531 | Organism:Severe | TCATAATGAAACTTGTACGCCTAAACGAACATGAAATTTCTTGTTTTCTTAGGAATCAT | 27922 |
| gb:MN996528 | Organism:Severe | TCATAATGAAACTTGTACGCCTAAACGAACATGAAATTTCTTGTTTTCTTAGGAATCAT | 27922 |
| gb:MN996530 | Organism:Severe | TCATAATGAAACTTGTACGCCTAAACGAACATGAAATTTCTTGTTTTCTTAGGAATCAT | 27908 |
| gb:MN908947 | Organism:Severe | TCATAATGAAACTTGTACGCCTAAACGAACATGAAATTTCTTGTTTTCTTAGGAATCAT | 27922 |
| gb:MT019532 | Organism:Severe | TCATAATGAAACTTGTACGCCTAAACGAACATGAAATTTCTTGTTTTCTTAGGAATCAT | 27922 |

\*\*\*\*\*

|             |                 |                                                            |       |
|-------------|-----------------|------------------------------------------------------------|-------|
| gb:MT020781 | Organism:Severe | CACAACGTAGCTGCATTTACCAAGAATGTAGTTTACAGTCATGTACTCAACATCAACC | 27970 |
| gb:MT007544 | Organism:Severe | CACAACGTAGCTGCATTTACCAAGAATGTAGTTTACAGTCATGTACTCAACATCAACC | 27982 |
| gb:MN994467 | Organism:Severe | CACAACGTAGCTGCATTTACCAAGAATGTAGTTTACAGTCATGTACTCAACATCAACC | 27982 |
| gb:MT044257 | Organism:Severe | CACAACGTAGCTGCATTTACCAAGAATGTAGTTTACAGTCATGTACTCAACATCAACC | 27982 |
| gb:MT106054 | Organism:Severe | CACAACGTAGCTGCATTTACCAAGAATGTAGTTTACAGTCATGTACTCAACATCAACC | 27982 |
| gb:MT049951 | Organism:Severe | CACAACGTAGCTGCATTTACCAAGAATGTAGTTTACAGTCATGTACTCAACATCAACC | 27982 |
| gb:MN975262 | Organism:Severe | CACAACGTAGCTGCATTTACCAAGAATGTAGTTTACAGTCATGTACTCAACATCAACC | 27982 |
| gb:MT106052 | Organism:Severe | CACAACGTAGCTGCATTTACCAAGAATGTAGTTTACAGTCATGTACTCAACATCAACC | 27982 |
| gb:LC522975 | Organism:Severe | CACAACGTAGCTGCATTTACCAAGAATGTAGTTTACAGTCATGTACTCAACATCAACC | 27979 |
| gb:LC522973 | Organism:Severe | CACAACGTAGCTGCATTTACCAAGAATGTAGTTTACAGTCATGTACTCAACATCAACC | 27979 |

|             |                 |                                                            |       |
|-------------|-----------------|------------------------------------------------------------|-------|
| gb:LC522974 | Organism:Severe | CACAACGTGAGCTGCATTTACCAAGAATGTAGTTTACAGTCATGACTCAACATCAACC | 27979 |
| gb:MN985325 | Organism:Severe | CACAACGTGAGCTGCATTTACCAAGAATGTAGTTTACAGTCATGACTCAACATCAACC | 27982 |
| gb:MT020881 | Organism:Severe | CACAACGTGAGCTGCATTTACCAAGAATGTAGTTTACAGTCATGACTCAACATCAACC | 27982 |
| gb:MT020880 | Organism:Severe | CACAACGTGAGCTGCATTTACCAAGAATGTAGTTTACAGTCATGACTCAACATCAACC | 27982 |
| gb:MT066175 | Organism:Severe | CACAACGTGAGCTGCATTTACCAAGAATGTAGTTTACAGTCATGACTCAACATCAACC | 27982 |
| gb:MN997409 | Organism:Severe | CACAACGTGAGCTGCATTTACCAAGAATGTAGTTTACAGTCATGACTCAACATCAACC | 27982 |
| gb:MN938384 | Organism:Severe | CACAACGTGAGCTGCATTTACCAAGAATGTAGTTTACAGTCATGACTCAACATCAACC | 27950 |
| gb:MT044258 | Organism:Severe | CACAACGTGAGCTGCATTTACCAAGAATGTAGTTTACAGTCATGACTCAACATCAACC | 27958 |
| gb:MT039890 | Organism:Severe | CACAACGTGAGCTGCATTTACCAAGAATGTAGTTTACAGTCATGACTCAACATCAACC | 27982 |
| gb:MN988713 | Organism:Severe | CACAACGTGAGCTGCATTTACCAAGAATGTAGTTTACAGTCATGACTCAACATCAACC | 27982 |
| gb:LC521925 | Organism:Severe | CACAACGTGAGCTGCATTTACCAAGAATGTAGTTTACAGTCATGACTCAACATCAACC | 27955 |
| gb:MT093571 | Organism:Severe | CACAACGTGAGCTGCATTTACCAAGAATGTAGTTTACAGTCATGACTCAACATCAACC | 27982 |
| gb:MT039887 | Organism:Severe | CACAACGTGAGCTGCATTTACCAAGAATGTAGTTTACAGTCATGACTCAACATCAACC | 27979 |
| gb:MT019530 | Organism:Severe | CACAACGTGAGCTGCATTTACCAAGAATGTAGTTTACAGTCATGACTCAACATCAACC | 27982 |
| gb:MT039888 | Organism:Severe | CACAACGTGAGCTGCATTTACCAAGAATGTAGTTTACAGTCATGACTCAACATCAACC | 27982 |
| gb:LC522972 | Organism:Severe | CACAACGTGAGCTGCATTTACCAAGAATGTAGTTTACAGTCATGACTCAACATCAACC | 27979 |
| gb:MT027063 | Organism:Severe | CACAACGTGAGCTGCATTTACCAAGAATGTAGTTTACAGTCATGACTCAACATCAACC | 27982 |
| gb:MT027062 | Organism:Severe | CACAACGTGAGCTGCATTTACCAAGAATGTAGTTTACAGTCATGACTCAACATCAACC | 27982 |
| gb:MT019529 | Organism:Severe | CACAACGTGAGCTGCATTTACCAAGAATGTAGTTTACAGTCATGACTCAACATCAACC | 27982 |
| gb:MN996529 | Organism:Severe | CACAACGTGAGCTGCATTTACCAAGAATGTAGTTTACAGTCATGACTCAACATCAACC | 27970 |
| gb:MN996531 | Organism:Severe | CACAACGTGAGCTGCATTTACCAAGAATGTAGTTTACAGTCATGACTCAACATCAACC | 27969 |
| gb:MT066176 | Organism:Severe | CACAACGTGAGCTGCATTTACCAAGAATGTAGTTTACAGTCATGACTCAACATCAACC | 27982 |
| gb:MT027064 | Organism:Severe | CACAACGTGAGCTGCATTTACCAAGAATGTAGTTTACAGTCATGACTCAACATCAACC | 27982 |
| gb:MN994468 | Organism:Severe | CACAACGTGAGCTGCATTTACCAAGAATGTAGTTTACAGTCATGACTCAACATCAACC | 27982 |
| gb:MT072688 | Organism:Severe | CACAACGTGAGCTGCATTTACCAAGAATGTAGTTTACAGTCATGACTCAACATCAACC | 27967 |
| gb:MN996527 | Organism:Severe | CACAACGTGAGCTGCATTTACCAAGAATGTAGTTTACAGTCATGACTCAACATCAACC | 27949 |
| gb:MT093631 | Organism:Severe | CACAACGTGAGCTGCATTTACCAAGAATGTAGTTTACAGTCATGACTCAACATCAACC | 28020 |
| gb:MT106053 | Organism:Severe | CACAACGTGAGCTGCATTTACCAAGAATGTAGTTTACAGTCATGACTCAACATCAACC | 27982 |
| gb:MT019533 | Organism:Severe | CACAACGTGAGCTGCATTTACCAAGAATGTAGTTTACAGTCATGACTCAACATCAACC | 27982 |
| gb:MT019531 | Organism:Severe | CACAACGTGAGCTGCATTTACCAAGAATGTAGTTTACAGTCATGACTCAACATCAACC | 27982 |
| gb:MN996528 | Organism:Severe | CACAACGTGAGCTGCATTTACCAAGAATGTAGTTTACAGTCATGACTCAACATCAACC | 27982 |
| gb:MN996530 | Organism:Severe | CACAACGTGAGCTGCATTTACCAAGAATGTAGTTTACAGTCATGACTCAACATCAACC | 27968 |
| gb:MN908947 | Organism:Severe | CACAACGTGAGCTGCATTTACCAAGAATGTAGTTTACAGTCATGACTCAACATCAACC | 27982 |
| gb:MT019532 | Organism:Severe | CACAACGTGAGCTGCATTTACCAAGAATGTAGTTTACAGTCATGACTCAACATCAACC | 27982 |

\*\* \*\*\*\*\*

|             |                 |                                                               |       |
|-------------|-----------------|---------------------------------------------------------------|-------|
| gb:MT020781 | Organism:Severe | ATATGTAGTTGATGACCCGTGTCCTATTCACCTTCTATTCTAAATGGTATATTAGAGTAGG | 28030 |
| gb:MT007544 | Organism:Severe | ATATGTAGTTGATGACCCGTGTCCTATTCACCTTCTATTCTAAATGGTATATTAGAGTAGG | 28042 |
| gb:MN994467 | Organism:Severe | ATATGTAGTTGATGACCCGTGTCCTATTCACCTTCTATTCTAAATGGTATATTAGAGTAGG | 28042 |
| gb:MT044257 | Organism:Severe | ATATGTAGTTGATGACCCGTGTCCTATTCACCTTCTATTCTAAATGGTATATTAGAGTAGG | 28042 |
| gb:MT106054 | Organism:Severe | ATATGTAGTTGATGACCCGTGTCCTATTCACCTTCTATTCTAAATGGTATATTAGAGTAGG | 28042 |
| gb:MT049951 | Organism:Severe | ATATGTAGTTGATGACCCGTGTCCTATTCACCTTCTATTCTAAATGGTATATTAGAGTAGG | 28042 |
| gb:MN975262 | Organism:Severe | ATATGTAGTTGATGACCCGTGTCCTATTCACCTTCTATTCTAAATGGTATATTAGAGTAGG | 28042 |
| gb:MT106052 | Organism:Severe | ATATGTAGTTGATGACCCGTGTCCTATTCACCTTCTATTCTAAATGGTATATTAGAGTAGG | 28042 |
| gb:LC522975 | Organism:Severe | ATATGTAGTTGATGACCCGTGTCCTATTCACCTTCTATTCTAAATGGTATATTAGAGTAGG | 28039 |
| gb:LC522973 | Organism:Severe | ATATGTAGTTGATGACCCGTGTCCTATTCACCTTCTATTCTAAATGGTATATTAGAGTAGG | 28039 |
| gb:LC522974 | Organism:Severe | ATATGTAGTTGATGACCCGTGTCCTATTCACCTTCTATTCTAAATGGTATATTAGAGTAGG | 28039 |
| gb:MN985325 | Organism:Severe | ATATGTAGTTGATGACCCGTGTCCTATTCACCTTCTATTCTAAATGGTATATTAGAGTAGG | 28042 |
| gb:MT020881 | Organism:Severe | ATATGTAGTTGATGACCCGTGTCCTATTCACCTTCTATTCTAAATGGTATATTAGAGTAGG | 28042 |
| gb:MT020880 | Organism:Severe | ATATGTAGTTGATGACCCGTGTCCTATTCACCTTCTATTCTAAATGGTATATTAGAGTAGG | 28042 |
| gb:MT066175 | Organism:Severe | ATATGTAGTTGATGACCCGTGTCCTATTCACCTTCTATTCTAAATGGTATATTAGAGTAGG | 28042 |
| gb:MN997409 | Organism:Severe | ATATGTAGTTGATGACCCGTGTCCTATTCACCTTCTATTCTAAATGGTATATTAGAGTAGG | 28042 |
| gb:MN938384 | Organism:Severe | ATATGTAGTTGATGACCCGTGTCCTATTCACCTTCTATTCTAAATGGTATATTAGAGTAGG | 28010 |
| gb:MT044258 | Organism:Severe | ATATGTAGTTGATGACCCGTGTCCTATTCACCTTCTATTCTAAATGGTATATTAGAGTAGG | 28018 |
| gb:MT039890 | Organism:Severe | ATATGTAGTTGATGACCCGTGTCCTATTCACCTTCTATTCTAAATGGTATATTAGAGTAGG | 28042 |
| gb:MN988713 | Organism:Severe | ATATGTAGTTGATGACCCGTGTCCTATTCACCTTCTATTCTAAATGGTATATTAGAGTAGG | 28042 |
| gb:LC521925 | Organism:Severe | ATATGTAGTTGATGACCCGTGTCCTATTCACCTTCTATTCTAAATGGTATATTAGAGTAGG | 28015 |
| gb:MT093571 | Organism:Severe | ATATGTAGTTGATGACCCGTGTCCTATTCACCTTCTATTCTAAATGGTATATTAGAGTAGG | 28042 |
| gb:MT039887 | Organism:Severe | ATATGTAGTTGATGACCCGTGTCCTATTCACCTTCTATTCTAAATGGTATATTAGAGTAGG | 28039 |
| gb:MT019530 | Organism:Severe | ATATGTAGTTGATGACCCGTGTCCTATTCACCTTCTATTCTAAATGGTATATTAGAGTAGG | 28042 |
| gb:MT039888 | Organism:Severe | ATATGTAGTTGATGACCCGTGTCCTATTCACCTTCTATTCTAAATGGTATATTAGAGTAGG | 28042 |
| gb:LC522972 | Organism:Severe | ATATGTAGTTGATGACCCGTGTCCTATTCACCTTCTATTCTAAATGGTATATTAGAGTAGG | 28039 |
| gb:MT027063 | Organism:Severe | ATATGTAGTTGATGACCCGTGTCCTATTCACCTTCTATTCTAAATGGTATATTAGAGTAGG | 28042 |
| gb:MT027062 | Organism:Severe | ATATGTAGTTGATGACCCGTGTCCTATTCACCTTCTATTCTAAATGGTATATTAGAGTAGG | 28042 |
| gb:MT019529 | Organism:Severe | ATATGTAGTTGATGACCCGTGTCCTATTCACCTTCTATTCTAAATGGTATATTAGAGTAGG | 28042 |

|             |                 |                                                               |       |
|-------------|-----------------|---------------------------------------------------------------|-------|
| gb:MN996529 | Organism:Severe | ATATGTAGTTGATGACCCGTGTCCTATTCACCTTCTATTCTAAATGGTATATTAGAGTAGG | 28030 |
| gb:MN996531 | Organism:Severe | ATATGTAGTTGATGACCCGTGTCCTATTCACCTTCTATTCTAAATGGTATATTAGAGTAGG | 28029 |
| gb:MT066176 | Organism:Severe | ATATGTAGTTGATGACCCGTGTCCTATTCACCTTCTATTCTAAATGGTATATTAGAGTAGG | 28042 |
| gb:MT027064 | Organism:Severe | ATATGTAGTTGATGACCCGTGTCCTATTCACCTTCTATTCTAAATGGTATATTAGAGTAGG | 28042 |
| gb:MN994468 | Organism:Severe | ATATGTAGTTGATGACCCGTGTCCTATTCACCTTCTATTCTAAATGGTATATTAGAGTAGG | 28042 |
| gb:MT072688 | Organism:Severe | ATATGTAGTTGATGACCCGTGTCCTATTCACCTTCTATTCTAAATGGTATATTAGAGTAGG | 28027 |
| gb:MN996527 | Organism:Severe | ATATGTAGTTGATGACCCGTGTCCTATTCACCTTCTATTCTAAATGGTATATTAGAGTAGG | 28009 |
| gb:MT093631 | Organism:Severe | ATATGTAGTTGATGACCCGTGTCCTATTCACCTTCTATTCTAAATGGTATATTAGAGTAGG | 28080 |
| gb:MT106053 | Organism:Severe | ATATGTAGTTGATGACCCGTGTCCTATTCACCTTCTATTCTAAATGGTATATTAGAGTAGG | 28042 |
| gb:MT019533 | Organism:Severe | ATATGTAGTTGATGACCCGTGTCCTATTCACCTTCTATTCTAAATGGTATATTAGAGTAGG | 28042 |
| gb:MT019531 | Organism:Severe | ATATGTAGTTGATGACCCGTGTCCTATTCACCTTCTATTCTAAATGGTATATTAGAGTAGG | 28042 |
| gb:MN996528 | Organism:Severe | ATATGTAGTTGATGACCCGTGTCCTATTCACCTTCTATTCTAAATGGTATATTAGAGTAGG | 28042 |
| gb:MN996530 | Organism:Severe | ATATGTAGTTGATGACCCGTGTCCTATTCACCTTCTATTCTAAATGGTATATTAGAGTAGG | 28028 |
| gb:MN908947 | Organism:Severe | ATATGTAGTTGATGACCCGTGTCCTATTCACCTTCTATTCTAAATGGTATATTAGAGTAGG | 28042 |
| gb:MT019532 | Organism:Severe | ATATGTAGTTGATGACCCGTGTCCTATTCACCTTCTATTCTAAATGGTATATTAGAGTAGG | 28042 |

\*\*\*\*\*

|             |                 |                                                              |       |
|-------------|-----------------|--------------------------------------------------------------|-------|
| gb:MT020781 | Organism:Severe | AGCTAGAAAATCAGCACCTTTAATTGAATTGTGCGTGGATGAGGCTGGTTCTAAATCACC | 28090 |
| gb:MT007544 | Organism:Severe | AGCTAGAAAATCAGCACCTTTAATTGAATTGTGCGTGGATGAGGCTGGTTCTAAATCACC | 28102 |
| gb:MN994467 | Organism:Severe | AGCTAGAAAATCAGCACCTTTAATTGAATTGTGCGTGGATGAGGCTGGTTCTAAATCACC | 28102 |
| gb:MT044257 | Organism:Severe | AGCTAGAAAATCAGCACCTTTAATTGAATTGTGCGTGGATGAGGCTGGTTCTAAATCACC | 28102 |
| gb:MT106054 | Organism:Severe | AGCTAGAAAATCAGCACCTTTAATTGAATTGTGCGTGGATGAGGCTGGTTCTAAATCACC | 28102 |
| gb:MT049951 | Organism:Severe | AGCTAGAAAATCAGCACCTTTAATTGAATTGTGCGTGGATGAGGCTGGTTCTAAATCACC | 28102 |
| gb:MN975262 | Organism:Severe | AGCTAGAAAATCAGCACCTTTAATTGAATTGTGCGTGGATGAGGCTGGTTCTAAATCACC | 28102 |
| gb:MT106052 | Organism:Severe | AGCTAGAAAATCAGCACCTTTAATTGAATTGTGCGTGGATGAGGCTGGTTCTAAATCACC | 28102 |
| gb:LC522975 | Organism:Severe | AGCTAGAAAATCAGCACCTTTAATTGAATTGTGCGTGGATGAGGCTGGTTCTAAATCACC | 28099 |
| gb:LC522973 | Organism:Severe | AGCTAGAAAATCAGCACCTTTAATTGAATTGTGCGTGGATGAGGCTGGTTCTAAATCACC | 28099 |
| gb:LC522974 | Organism:Severe | AGCTAGAAAATCAGCACCTTTAATTGAATTGTGCGTGGATGAGGCTGGTTCTAAATCACC | 28099 |
| gb:MN985325 | Organism:Severe | AGCTAGAAAATCAGCACCTTTAATTGAATTGTGCGTGGATGAGGCTGGTTCTAAATCACC | 28102 |
| gb:MT020881 | Organism:Severe | AGCTAGAAAATCAGCACCTTTAATTGAATTGTGCGTGGATGAGGCTGGTTCTAAATCACC | 28102 |
| gb:MT020880 | Organism:Severe | AGCTAGAAAATCAGCACCTTTAATTGAATTGTGCGTGGATGAGGCTGGTTCTAAATCACC | 28102 |
| gb:MT066175 | Organism:Severe | AGCTAGAAAATCAGCACCTTTAATTGAATTGTGCGTGGATGAGGCTGGTTCTAAATCACC | 28102 |
| gb:MN997409 | Organism:Severe | AGCTAGAAAATCAGCACCTTTAATTGAATTGTGCGTGGATGAGGCTGGTTCTAAATCACC | 28102 |
| gb:MN938384 | Organism:Severe | AGCTAGAAAATCAGCACCTTTAATTGAATTGTGCGTGGATGAGGCTGGTTCTAAATCACC | 28070 |
| gb:MT044258 | Organism:Severe | AGCTAGAAAATCAGCACCTTTAATTGAATTGTGCGTGGATGAGGCTGGTTCTAAATCACC | 28078 |
| gb:MT039890 | Organism:Severe | AGCTAGAAAATCAGCACCTTTAATTGAATTGTGCGTGGATGAGGCTGGTTCTAAATCACC | 28102 |
| gb:MN988713 | Organism:Severe | AGCTAGAAAATCAGCACCTTTAATTGAATTGTGCGTGGATGAGGCTGGTTCTAAATCACC | 28102 |
| gb:LC521925 | Organism:Severe | AGCTAGAAAATCAGCACCTTTAATTGAATTGTGCGTGGATGAGGCTGGTTCTAAATCACC | 28075 |
| gb:MT093571 | Organism:Severe | AGCTAGAAAATCAGCACCTTTAATTGAATTGTGCGTGGATGAGGCTGGTTCTAAATCACC | 28102 |
| gb:MT039887 | Organism:Severe | AGCTAGAAAATCAGCACCTTTAATTGAATTGTGCGTGGATGAGGCTGGTTCTAAATCACC | 28099 |
| gb:MT019530 | Organism:Severe | AGCTAGAAAATCAGCACCTTTAATTGAATTGTGCGTGGATGAGGCTGGTTCTAAATCACC | 28102 |
| gb:MT039888 | Organism:Severe | AGCTAGAAAATCAGCACCTTTAATTGAATTGTGCGTGGATGAGGCTGGTTCTAAATCACC | 28102 |
| gb:LC522972 | Organism:Severe | AGCTAGAAAATCAGCACCTTTAATTGAATTGTGCGTGGATGAGGCTGGTTCTAAATCACC | 28099 |
| gb:MT027063 | Organism:Severe | AGCTAGAAAATCAGCACCTTTAATTGAATTGTGCGTGGATGAGGCTGGTTCTAAATCACC | 28102 |
| gb:MT027062 | Organism:Severe | AGCTAGAAAATCAGCACCTTTAATTGAATTGTGCGTGGATGAGGCTGGTTCTAAATCACC | 28102 |
| gb:MT019529 | Organism:Severe | AGCTAGAAAATCAGCACCTTTAATTGAATTGTGCGTGGATGAGGCTGGTTCTAAATCACC | 28102 |
| gb:MN996529 | Organism:Severe | AGCTAGAAAATCAGCACCTTTAATTGAATTGTGCGTGGATGAGGCTGGTTCTAAATCACC | 28090 |
| gb:MN996531 | Organism:Severe | AGCTAGAAAATCAGCACCTTTAATTGAATTGTGCGTGGATGAGGCTGGTTCTAAATCACC | 28089 |
| gb:MT066176 | Organism:Severe | AGCTAGAAAATCAGCACCTTTAATTGAATTGTGCGTGGATGAGGCTGGTTCTAAATCACC | 28102 |
| gb:MT027064 | Organism:Severe | AGCTAGAAAATCAGCACCTTTAATTGAATTGTGCGTGGATGAGGCTGGTTCTAAATCACC | 28102 |
| gb:MN994468 | Organism:Severe | AGCTAGAAAATCAGCACCTTTAATTGAATTGTGCGTGGATGAGGCTGGTTCTAAATCACC | 28102 |
| gb:MT072688 | Organism:Severe | AGCTAGAAAATCAGCACCTTTAATTGAATTGTGCGTGGATGAGGCTGGTTCTAAATCACC | 28087 |
| gb:MN996527 | Organism:Severe | AGCTAGAAAATCAGCACCTTTAATTGAATTGTGCGTGGATGAGGCTGGTTCTAAATCACC | 28069 |
| gb:MT093631 | Organism:Severe | AGCTAGAAAATCAGCACCTTTAATTGAATTGTGCGTGGATGAGGCTGGTTCTAAATCACC | 28140 |
| gb:MT106053 | Organism:Severe | AGCTAGAAAATCAGCACCTTTAATTGAATTGTGCGTGGATGAGGCTGGTTCTAAATCACC | 28102 |
| gb:MT019533 | Organism:Severe | AGCTAGAAAATCAGCACCTTTAATTGAATTGTGCGTGGATGAGGCTGGTTCTAAATCACC | 28102 |
| gb:MT019531 | Organism:Severe | AGCTAGAAAATCAGCACCTTTAATTGAATTGTGCGTGGATGAGGCTGGTTCTAAATCACC | 28102 |
| gb:MN996528 | Organism:Severe | AGCTAGAAAATCAGCACCTTTAATTGAATTGTGCGTGGATGAGGCTGGTTCTAAATCACC | 28102 |
| gb:MN996530 | Organism:Severe | AGCTAGAAAATCAGCACCTTTAATTGAATTGTGCGTGGATGAGGCTGGTTCTAAATCACC | 28088 |
| gb:MN908947 | Organism:Severe | AGCTAGAAAATCAGCACCTTTAATTGAATTGTGCGTGGATGAGGCTGGTTCTAAATCACC | 28102 |
| gb:MT019532 | Organism:Severe | AGCTAGAAAATCAGCACCTTTAATTGAATTGTGCGTGGATGAGGCTGGTTCTAAATCACC | 28102 |

\*\*\*\*\*

|             |                 |                                                              |       |
|-------------|-----------------|--------------------------------------------------------------|-------|
| gb:MT020781 | Organism:Severe | CATTTCAGTACATCGATATCGGTAATTATACAGTTTCTGTTTACCTTTTACAATTAATTG | 28150 |
| gb:MT007544 | Organism:Severe | CATTTCAGTACATCGATATCGGTAATTATACAGTTTCTGTTTACCTTTTACAATTAATTG | 28162 |

|             |                 |                                                            |       |
|-------------|-----------------|------------------------------------------------------------|-------|
| gb:MN994467 | Organism:Severe | CATTCAGTACATCGATATCGGTAATTATACAGTTTCTGTTACCTTTTACAATTAATTG | 28162 |
| gb:MT044257 | Organism:Severe | CATTCAGTACATCGATATCGGTAATTATACAGTTTCTGTTACCTTTTACAATTAATTG | 28162 |
| gb:MT106054 | Organism:Severe | CATTCAGTACATCGATATCGGTAATTATACAGTTTCTGTTACCTTTTACAATTAATTG | 28162 |
| gb:MT049951 | Organism:Severe | CATTCAGTACATCGATATCGGTAATTATACAGTTTCTGTTACCTTTTACAATTAATTG | 28162 |
| gb:MN975262 | Organism:Severe | CATTCAGTACATCGATATCGGTAATTATACAGTTTCTGTTACCTTTTACAATTAATTG | 28162 |
| gb:MT106052 | Organism:Severe | CATTCAGTACATCGATATCGGTAATTATACAGTTTCTGTTACCTTTTACAATTAATTG | 28162 |
| gb:LC522975 | Organism:Severe | CATTCAGTACATCGATATCGGTAATTATACAGTTTCTGTTACCTTTTACAATTAATTG | 28159 |
| gb:LC522973 | Organism:Severe | CATTCAGTACATCGATATCGGTAATTATACAGTTTCTGTTACCTTTTACAATTAATTG | 28159 |
| gb:LC522974 | Organism:Severe | CATTCAGTACATCGATATCGGTAATTATACAGTTTCTGTTACCTTTTACAATTAATTG | 28159 |
| gb:MN985325 | Organism:Severe | CATTCAGTACATCGATATCGGTAATTATACAGTTTCTGTTACCTTTTACAATTAATTG | 28162 |
| gb:MT020881 | Organism:Severe | CATTCAGTACATCGATATCGGTAATTATACAGTTTCTGTTACCTTTTACAATTAATTG | 28162 |
| gb:MT020880 | Organism:Severe | CATTCAGTACATCGATATCGGTAATTATACAGTTTCTGTTACCTTTTACAATTAATTG | 28162 |
| gb:MT066175 | Organism:Severe | CATTCAGTACATCGATATCGGTAATTATACAGTTTCTGTTACCTTTTACAATTAATTG | 28162 |
| gb:MN997409 | Organism:Severe | CATTCAGTACATCGATATCGGTAATTATACAGTTTCTGTTACCTTTTACAATTAATTG | 28162 |
| gb:MN938384 | Organism:Severe | CATTCAGTACATCGATATCGGTAATTATACAGTTTCTGTTACCTTTTACAATTAATTG | 28130 |
| gb:MT044258 | Organism:Severe | CATTCAGTACATCGATATCGGTAATTATACAGTTTCTGTTACCTTTTACAATTAATTG | 28138 |
| gb:MT039890 | Organism:Severe | CATTCAGTACATCGATATCGGTAATTATACAGTTTCTGTTACCTTTTACAATTAATTG | 28162 |
| gb:MN988713 | Organism:Severe | CATTCAGTACATCGATATCGGTAATTATACAGTTTCTGTTACCTTTTACAATTAATTG | 28162 |
| gb:LC521925 | Organism:Severe | CATTCAGTACATCGATATCGGTAATTATACAGTTTCTGTTACCTTTTACAATTAATTG | 28135 |
| gb:MT093571 | Organism:Severe | CATTCAGTACATCGATATCGGTAATTATACAGTTTCTGTTACCTTTTACAATTAATTG | 28162 |
| gb:MT039887 | Organism:Severe | CATTCAGTACATCGATATCGGTAATTATACAGTTTCTGTTACCTTTTACAATTAATTG | 28159 |
| gb:MT019530 | Organism:Severe | CATTCAGTACATCGATATCGGTAATTATACAGTTTCTGTTACCTTTTACAATTAATTG | 28162 |
| gb:MT039888 | Organism:Severe | CATTCAGTACATCGATATCGGTAATTATACAGTTTCTGTTACCTTTTACAATTAATTG | 28162 |
| gb:LC522972 | Organism:Severe | CATTCAGTACATCGATATCGGTAATTATACAGTTTCTGTTACCTTTTACAATTAATTG | 28159 |
| gb:MT027063 | Organism:Severe | CATTCAGTACATCGATATCGGTAATTATACAGTTTCTGTTACCTTTTACAATTAATTG | 28162 |
| gb:MT027062 | Organism:Severe | CATTCAGTACATCGATATCGGTAATTATACAGTTTCTGTTACCTTTTACAATTAATTG | 28162 |
| gb:MT019529 | Organism:Severe | CATTCAGTACATCGATATCGGTAATTATACAGTTTCTGTTACCTTTTACAATTAATTG | 28162 |
| gb:MN996529 | Organism:Severe | CATTCAGTACATCGATATCGGTAATTATACAGTTTCTGTTACCTTTTACAATTAATTG | 28150 |
| gb:MN996531 | Organism:Severe | CATTCAGTACATCGATATCGGTAATTATACAGTTTCTGTTACCTTTTACAATTAATTG | 28149 |
| gb:MT066176 | Organism:Severe | CATTCAGTACATCGATATCGGTAATTATACAGTTTCTGTTACCTTTTACAATTAATTG | 28162 |
| gb:MT027064 | Organism:Severe | CATTCAGTACATCGATATCGGTAATTATACAGTTTCTGTTACCTTTTACAATTAATTG | 28162 |
| gb:MN994468 | Organism:Severe | CATTCAGTACATCGATATCGGTAATTATACAGTTTCTGTTACCTTTTACAATTAATTG | 28162 |
| gb:MT072688 | Organism:Severe | CATTCAGTACATCGATATCGGTAATTATACAGTTTCTGTTACCTTTTACAATTAATTG | 28147 |
| gb:MN996527 | Organism:Severe | CATTCAGTACATCGATATCGGTAATTATACAGTTTCTGTTACCTTTTACAATTAATTG | 28129 |
| gb:MT093631 | Organism:Severe | CATTCAGTACATCGATATCGGTAATTATACAGTTTCTGTTACCTTTTACAATTAATTG | 28200 |
| gb:MT106053 | Organism:Severe | CATTCAGTACATCGATATCGGTAATTATACAGTTTCTGTTACCTTTTACAATTAATTG | 28162 |
| gb:MT019533 | Organism:Severe | CATTCAGTACATCGATATCGGTAATTATACAGTTTCTGTTACCTTTTACAATTAATTG | 28162 |
| gb:MT019531 | Organism:Severe | CATTCAGTACATCGATATCGGTAATTATACAGTTTCTGTTACCTTTTACAATTAATTG | 28162 |
| gb:MN996528 | Organism:Severe | CATTCAGTACATCGATATCGGTAATTATACAGTTTCTGTTACCTTTTACAATTAATTG | 28162 |
| gb:MN996530 | Organism:Severe | CATTCAGTACATCGATATCGGTAATTATACAGTTTCTGTTACCTTTTACAATTAATTG | 28148 |
| gb:MN908947 | Organism:Severe | CATTCAGTACATCGATATCGGTAATTATACAGTTTCTGTTACCTTTTACAATTAATTG | 28162 |
| gb:MT019532 | Organism:Severe | CATTCAGTACATCGATATCGGTAATTATACAGTTTCTGTTACCTTTTACAATTAATTG | 28162 |

\*\*\*\*\*

|             |                 |                                                             |       |
|-------------|-----------------|-------------------------------------------------------------|-------|
| gb:MT020781 | Organism:Severe | CCAGGAACCTAAATTGGGTAGTCTTGAGTGCCTGTTTCGTTCTATGAAGACTTTTTAGA | 28210 |
| gb:MT007544 | Organism:Severe | CCAGGAACCTAAATTGGGTAGTCTTGAGTGCCTGTTTCGTTCTATGAAGACTTTTTAGA | 28222 |
| gb:MN994467 | Organism:Severe | CCAGGAACCTAAATTGGGTAGTCTTGAGTGCCTGTTTCGTTCTATGAAGACTTTTTAGA | 28222 |
| gb:MT044257 | Organism:Severe | CCAGGAACCTAAATTGGGTAGTCTTGAGTGCCTGTTTCGTTCTATGAAGACTTTTTAGA | 28222 |
| gb:MT106054 | Organism:Severe | CCAGGAACCTAAATTGGGTAGTCTTGAGTGCCTGTTTCGTTCTATGAAGACTTTTTAGA | 28222 |
| gb:MT049951 | Organism:Severe | CCAGGAACCTAAATTGGGTAGTCTTGAGTGCCTGTTTCGTTCTATGAAGACTTTTTAGA | 28222 |
| gb:MN975262 | Organism:Severe | CCAGGAACCTAAATTGGGTAGTCTTGAGTGCCTGTTTCGTTCTATGAAGACTTTTTAGA | 28222 |
| gb:MT106052 | Organism:Severe | CCAGGAACCTAAATTGGGTAGTCTTGAGTGCCTGTTTCGTTCTATGAAGACTTTTTAGA | 28222 |
| gb:LC522975 | Organism:Severe | CCAGGAACCTAAATTGGGTAGTCTTGAGTGCCTGTTTCGTTCTATGAAGACTTTTTAGA | 28219 |
| gb:LC522973 | Organism:Severe | CCAGGAACCTAAATTGGGTAGTCTTGAGTGCCTGTTTCGTTCTATGAAGACTTTTTAGA | 28219 |
| gb:LC522974 | Organism:Severe | CCAGGAACCTAAATTGGGTAGTCTTGAGTGCCTGTTTCGTTCTATGAAGACTTTTTAGA | 28219 |
| gb:MN985325 | Organism:Severe | CCAGGAACCTAAATTGGGTAGTCTTGAGTGCCTGTTTCGTTCTATGAAGACTTTTTAGA | 28222 |
| gb:MT020881 | Organism:Severe | CCAGGAACCTAAATTGGGTAGTCTTGAGTGCCTGTTTCGTTCTATGAAGACTTTTTAGA | 28222 |
| gb:MT020880 | Organism:Severe | CCAGGAACCTAAATTGGGTAGTCTTGAGTGCCTGTTTCGTTCTATGAAGACTTTTTAGA | 28222 |
| gb:MT066175 | Organism:Severe | CCAGGAACCTAAATTGGGTAGTCTTGAGTGCCTGTTTCGTTCTATGAAGACTTTTTAGA | 28222 |
| gb:MN997409 | Organism:Severe | CCAGGAACCTAAATTGGGTAGTCTTGAGTGCCTGTTTCGTTCTATGAAGACTTTTTAGA | 28222 |
| gb:MN938384 | Organism:Severe | CCAGGAACCTAAATTGGGTAGTCTTGAGTGCCTGTTTCGTTCTATGAAGACTTTTTAGA | 28190 |
| gb:MT044258 | Organism:Severe | CCAGGAACCTAAATTGGGTAGTCTTGAGTGCCTGTTTCGTTCTATGAAGACTTTTTAGA | 28198 |
| gb:MT039890 | Organism:Severe | CCAGGAACCTAAATTGGGTAGTCTTGAGTGCCTGTTTCGTTCTATGAAGACTTTTTAGA | 28222 |
| gb:MN988713 | Organism:Severe | CCAGGAACCTAAATTGGGTAGTCTTGAGTGCCTGTTTCGTTCTATGAAGACTTTTTAGA | 28222 |
| gb:LC521925 | Organism:Severe | CCAGGAACCTAAATTGGGTAGTCTTGAGTGCCTGTTTCGTTCTATGAAGACTTTTTAGA | 28195 |

|             |                 |                                                               |       |
|-------------|-----------------|---------------------------------------------------------------|-------|
| gb:MT093571 | Organism:Severe | CCAGGAACCTAAATTGGGTAGTCTTGTAGTGC GTTGTTCGTTCTATGAAGACTTTTTAGA | 28222 |
| gb:MT039887 | Organism:Severe | CCAGGAACCTAAATTGGGTAGTCTTGTAGTGC GTTGTTCGTTCTATGAAGACTTTTTAGA | 28219 |
| gb:MT019530 | Organism:Severe | CCAGGAACCTAAATTGGGTAGTCTTGTAGTGC GTTGTTCGTTCTATGAAGACTTTTTAGA | 28222 |
| gb:MT039888 | Organism:Severe | CCAGGAACCTAAATTGGGTAGTCTTGTAGTGC GTTGTTCGTTCTATGAAGACTTTTTAGA | 28222 |
| gb:LC522972 | Organism:Severe | CCAGGAACCTAAATTGGGTAGTCTTGTAGTGC GTTGTTCGTTCTATGAAGACTTTTTAGA | 28219 |
| gb:MT027063 | Organism:Severe | CCAGGAACCTAAATTGGGTAGTCTTGTAGTGC GTTGTTCGTTCTATGAAGACTTTTTAGA | 28222 |
| gb:MT027062 | Organism:Severe | CCAGGAACCTAAATTGGGTAGTCTTGTAGTGC GTTGTTCGTTCTATGAAGACTTTTTAGA | 28222 |
| gb:MT019529 | Organism:Severe | CCAGGAACCTAAATTGGGTAGTCTTGTAGTGC GTTGTTCGTTCTATGAAGACTTTTTAGA | 28222 |
| gb:MN996529 | Organism:Severe | CCAGGAACCTAAATTGGGTAGTCTTGTAGTGC GTTGTTCGTTCTATGAAGACTTTTTAGA | 28210 |
| gb:MN996531 | Organism:Severe | CCAGGAACCTAAATTGGGTAGTCTTGTAGTGC GTTGTTCGTTCTATGAAGACTTTTTAGA | 28209 |
| gb:MT066176 | Organism:Severe | CCAGGAACCTAAATTGGGTAGTCTTGTAGTGC GTTGTTCGTTCTATGAAGACTTTTTAGA | 28222 |
| gb:MT027064 | Organism:Severe | CCAGGAACCTAAATTGGGTAGTCTTGTAGTGC GTTGTTCGTTCTATGAAGACTTTTTAGA | 28222 |
| gb:MN994468 | Organism:Severe | CCAGGAACCTAAATTGGGTAGTCTTGTAGTGC GTTGTTCGTTCTATGAAGACTTTTTAGA | 28222 |
| gb:MT072688 | Organism:Severe | CCAGGAACCTAAATTGGGTAGTCTTGTAGTGC GTTGTTCGTTCTATGAAGACTTTTTAGA | 28207 |
| gb:MN996527 | Organism:Severe | CCAGGAACCTAAATTGGGTAGTCTTGTAGTGC GTTGTTCGTTCTATGAAGACTTTTTAGA | 28189 |
| gb:MT093631 | Organism:Severe | CCAGGAACCTAAATTGGGTAGTCTTGTAGTGC GTTGTTCGTTCTATGAAGACTTTTTAGA | 28260 |
| gb:MT106053 | Organism:Severe | CCAGGAACCTAAATTGGGTAGTCTTGTAGTGC GTTGTTCGTTCTATGAAGACTTTTTAGA | 28222 |
| gb:MT019533 | Organism:Severe | CCAGGAACCTAAATTGGGTAGTCTTGTAGTGC GTTGTTCGTTCTATGAAGACTTTTTAGA | 28222 |
| gb:MT019531 | Organism:Severe | CCAGGAACCTAAATTGGGTAGTCTTGTAGTGC GTTGTTCGTTCTATGAAGACTTTTTAGA | 28222 |
| gb:MN996528 | Organism:Severe | CCAGGAACCTAAATTGGGTAGTCTTGTAGTGC GTTGTTCGTTCTATGAAGACTTTTTAGA | 28222 |
| gb:MN996530 | Organism:Severe | CCAGGAACCTAAATTGGGTAGTCTTGTAGTGC GTTGTTCGTTCTATGAAGACTTTTTAGA | 28208 |
| gb:MN908947 | Organism:Severe | CCAGGAACCTAAATTGGGTAGTCTTGTAGTGC GTTGTTCGTTCTATGAAGACTTTTTAGA | 28222 |
| gb:MT019532 | Organism:Severe | CCAGGAACCTAAATTGGGTAGTCTTGTAGTGC GTTGTTCGTTCTATGAAGACTTTTTAGA | 28222 |

\*\*\*\*\*

|             |                 |                                                                |       |
|-------------|-----------------|----------------------------------------------------------------|-------|
| gb:MT020781 | Organism:Severe | GTATCATGACGTTTCGTGTTGTTTTAGATTT CATCTAAACGAACAAACTAAAATGTCTGAT | 28270 |
| gb:MT007544 | Organism:Severe | GTATCATGACGTTTCGTGTTGTTTTAGATTT CATCTAAACGAACAAACTAAAATGTCTGAT | 28282 |
| gb:MN994467 | Organism:Severe | GTATCATGACGTTTCGTGTTGTTTTAGATTT CATCTAAACGAACAAACTAAAATGTCTGAT | 28282 |
| gb:MT044257 | Organism:Severe | GTATCATGACGTTTCGTGTTGTTTTAGATTT CATCTAAACGAACAAACTAAAATGTCTGAT | 28282 |
| gb:MT106054 | Organism:Severe | GTATCATGACGTTTCGTGTTGTTTTAGATTT CATCTAAACGAACAAACTAAAATGTCTGAT | 28282 |
| gb:MT049951 | Organism:Severe | GTATCATGACGTTTCGTGTTGTTTTAGATTT CATCTAAACGAACAAACTAAAATGTCTGAT | 28282 |
| gb:MN975262 | Organism:Severe | GTATCATGACGTTTCGTGTTGTTTTAGATTT CATCTAAACGAACAAACTAAAATGTCTGAT | 28282 |
| gb:MT106052 | Organism:Severe | GTATCATGACGTTTCGTGTTGTTTTAGATTT CATCTAAACGAACAAACTAAAATGTCTGAT | 28282 |
| gb:LC522975 | Organism:Severe | GTATCATGACGTTTCGTGTTGTTTTAGATTT CATCTAAACGAACAAACTAAAATGTCTGAT | 28279 |
| gb:LC522973 | Organism:Severe | GTATCATGACGTTTCGTGTTGTTTTAGATTT CATCTAAACGAACAAACTAAAATGTCTGAT | 28279 |
| gb:LC522974 | Organism:Severe | GTATCATGACGTTTCGTGTTGTTTTAGATTT CATCTAAACGAACAAACTAAAATGTCTGAT | 28279 |
| gb:MN985325 | Organism:Severe | GTATCATGACGTTTCGTGTTGTTTTAGATTT CATCTAAACGAACAAACTAAAATGTCTGAT | 28282 |
| gb:MT020881 | Organism:Severe | GTATCATGACGTTTCGTGTTGTTTTAGATTT CATCTAAACGAACAAACTAAAATGTCTGAT | 28282 |
| gb:MT020880 | Organism:Severe | GTATCATGACGTTTCGTGTTGTTTTAGATTT CATCTAAACGAACAAACTAAAATGTCTGAT | 28282 |
| gb:MT066175 | Organism:Severe | GTATCATGACGTTTCGTGTTGTTTTAGATTT CATCTAAACGAACAAACTAAAATGTCTGAT | 28282 |
| gb:MN997409 | Organism:Severe | GTATCATGACGTTTCGTGTTGTTTTAGATTT CATCTAAACGAACAAACTAAAATGTCTGAT | 28282 |
| gb:MN938384 | Organism:Severe | GTATCATGACGTTTCGTGTTGTTTTAGATTT CATCTAAACGAACAAACTAAAATGTCTGAT | 28250 |
| gb:MT044258 | Organism:Severe | GTATCATGACGTTTCGTGTTGTTTTAGATTT CATCTAAACGAACAAACTAAAATGTCTGAT | 28258 |
| gb:MT039890 | Organism:Severe | GTATCATGACGTTTCGTGTTGTTTTAGATTT CATCTAAACGAACAAACTAAAATGTCTGAT | 28282 |
| gb:MN988713 | Organism:Severe | GTATCATGACGTTTCGTGTTGTTTTAGATTT CATCTAAACGAACAAACTAAAATGTCTGAT | 28282 |
| gb:LC521925 | Organism:Severe | GTATCATGACGTTTCGTGTTGTTTTAGATTT CATCTAAACGAACAAACTAAAATGTCTGAT | 28255 |
| gb:MT093571 | Organism:Severe | GTATCATGACGTTTCGTGTTGTTTTAGATTT CATCTAAACGAACAAACTAAAATGTCTGAT | 28282 |
| gb:MT039887 | Organism:Severe | GTATCATGACGTTTCGTGTTGTTTTAGATTT CATCTAAACGAACAAACTAAAATGTCTGAT | 28279 |
| gb:MT019530 | Organism:Severe | GTATCATGACGTTTCGTGTTGTTTTAGATTT CATCTAAACGAACAAACTAAAATGTCTGAT | 28282 |
| gb:MT039888 | Organism:Severe | GTATCATGACGTTTCGTGTTGTTTTAGATTT CATCTAAACGAACAAACTAAAATGTCTGAT | 28282 |
| gb:LC522972 | Organism:Severe | GTATCATGACGTTTCGTGTTGTTTTAGATTT CATCTAAACGAACAAACTAAAATGTCTGAT | 28279 |
| gb:MT027063 | Organism:Severe | GTATCATGACGTTTCGTGTTGTTTTAGATTT CATCTAAACGAACAAACTAAAATGTCTGAT | 28282 |
| gb:MT027062 | Organism:Severe | GTATCATGACGTTTCGTGTTGTTTTAGATTT CATCTAAACGAACAAACTAAAATGTCTGAT | 28282 |
| gb:MT019529 | Organism:Severe | GTATCATGACGTTTCGTGTTGTTTTAGATTT CATCTAAACGAACAAACTAAAATGTCTGAT | 28282 |
| gb:MN996529 | Organism:Severe | GTATCATGACGTTTCGTGTTGTTTTAGATTT CATCTAAACGAACAAACTAAAATGTCTGAT | 28270 |
| gb:MN996531 | Organism:Severe | GTATCATGACGTTTCGTGTTGTTTTAGATTT CATCTAAACGAACAAACTAAAATGTCTGAT | 28269 |
| gb:MT066176 | Organism:Severe | GTATCATGACGTTTCGTGTTGTTTTAGATTT CATCTAAACGAACAAACTAAAATGTCTGAT | 28282 |
| gb:MT027064 | Organism:Severe | GTATCATGACGTTTCGTGTTGTTTTAGATTT CATCTAAACGAACAAACTAAAATGTCTGAT | 28282 |
| gb:MN994468 | Organism:Severe | GTATCATGACGTTTCGTGTTGTTTTAGATTT CATCTAAACGAACAAACTAAAATGTCTGAT | 28282 |
| gb:MT072688 | Organism:Severe | GTATCATGACGTTTCGTGTTGTTTTAGATTT CATCTAAACGAACAAACTAAAATGTCTGAT | 28267 |
| gb:MN996527 | Organism:Severe | GTATCATGACGTTTCGTGTTGTTTTAGATTT CATCTAAACGAACAAACTAAAATGTCTGAT | 28249 |
| gb:MT093631 | Organism:Severe | GTATCATGACGTTTCGTGTTGTTTTAGATTT CATCTAAACGAACAAACTAAAATGTCTGAT | 28320 |
| gb:MT106053 | Organism:Severe | GTATCATGACGTTTCGTGTTGTTTTAGATTT CATCTAAACGAACAAACTAAAATGTCTGAT | 28282 |
| gb:MT019533 | Organism:Severe | GTATCATGACGTTTCGTGTTGTTTTAGATTT CATCTAAACGAACAAACTAAAATGTCTGAT | 28282 |
| gb:MT019531 | Organism:Severe | GTATCATGACGTTTCGTGTTGTTTTAGATTT CATCTAAACGAACAAACTAAAATGTCTGAT | 28282 |

|             |                  |                                                                        |       |
|-------------|------------------|------------------------------------------------------------------------|-------|
| gb:MN996528 | Organism: Severe | GTATCATGACGTTTCGTGTTGTTTTAGATTTTCATCTAAACGAACAACTAAAATGTCTGAT          | 28282 |
| gb:MN996530 | Organism: Severe | GTATCATGACGTTTCGTGTTGTTTTAGATTTTCATCTAAACGAACAACTAAAATGTCTGAT          | 28268 |
| gb:MN908947 | Organism: Severe | GTATCATGACGTTTCGTGTTGTTTTAGATTTTCATCTAAACGAACAACTAAAATGTCTGAT          | 28282 |
| gb:MT019532 | Organism: Severe | GTATCATGACGTTTCGTGTTGTTTTAGATTTTCATCTAAACGAACAACTAAAATGTCTGAT<br>***** | 28282 |
| gb:MT020781 | Organism: Severe | AATGGACCCCAAAATCAGCGAAATGCACCCCGCATTACGTTTGGTGGACCCTCAGATTCA           | 28330 |
| gb:MT007544 | Organism: Severe | AATGGACCCCAAAATCAGCGAAATGCACCCCGCATTACGTTTGGTGGACCCTCAGATTCA           | 28342 |
| gb:MN994467 | Organism: Severe | AATGGACCCCAAAATCAGCGAAATGCACCCCGCATTACGTTTGGTGGACCCTCAGATTCA           | 28342 |
| gb:MT044257 | Organism: Severe | AATGGACCCCAAAATCAGCGAAATGCACCCCGCATTACGTTTGGTGGACCCTCAGATTCA           | 28342 |
| gb:MT106054 | Organism: Severe | AATGGACCCCAAAATCAGCGAAATGCACCCCGCATTACGTTTGGTGGACCCTCAGATTCA           | 28342 |
| gb:MT049951 | Organism: Severe | AATGGACCCCAAAATCAGCGAAATGCACCCCGCATTACGTTTGGTGGACCCTCAGATTCA           | 28342 |
| gb:MN975262 | Organism: Severe | AATGGACCCCAAAATCAGCGAAATGCACCCCGCATTACGTTTGGTGGACCCTCAGATTCA           | 28342 |
| gb:MT106052 | Organism: Severe | AATGGACCCCAAAATCAGCGAAATGCACCCCGCATTACGTTTGGTGGACCCTCAGATTCA           | 28342 |
| gb:LC522975 | Organism: Severe | AATGGACCCCAAAATCAGCGAAATGCACCCCGCATTACGTTTGGTGGACCCTCAGATTCA           | 28339 |
| gb:LC522973 | Organism: Severe | AATGGACCCCAAAATCAGCGAAATGCACCCCGCATTACGTTTGGTGGACCCTCAGATTCA           | 28339 |
| gb:LC522974 | Organism: Severe | AATGGACCCCAAAATCAGCGAAATGCACCCCGCATTACGTTTGGTGGACCCTCAGATTCA           | 28339 |
| gb:MN985325 | Organism: Severe | AATGGACCCCAAAATCAGCGAAATGCACCCCGCATTACGTTTGGTGGACCCTCAGATTCA           | 28342 |
| gb:MT020881 | Organism: Severe | AATGGACCCCAAAATCAGCGAAATGCACCCCGCATTACGTTTGGTGGACCCTCAGATTCA           | 28342 |
| gb:MT020880 | Organism: Severe | AATGGACCCCAAAATCAGCGAAATGCACCCCGCATTACGTTTGGTGGACCCTCAGATTCA           | 28342 |
| gb:MT066175 | Organism: Severe | AATGGACCCCAAAATCAGCGAAATGCACCCCGCATTACGTTTGGTGGACCCTCAGATTCA           | 28342 |
| gb:MN997409 | Organism: Severe | AATGGACCCCAAAATCAGCGAAATGCACCCCGCATTACGTTTGGTGGACCCTCAGATTCA           | 28342 |
| gb:MN938384 | Organism: Severe | AATGGACCCCAAAATCAGCGAAATGCACCCCGCATTACGTTTGGTGGACCCTCAGATTCA           | 28310 |
| gb:MT044258 | Organism: Severe | AATGGACCCCAAAATCAGCGAAATGCACCCCGCATTACGTTTGGTGGACCCTCAGATTCA           | 28318 |
| gb:MT039890 | Organism: Severe | AATGGACCCCAAAATCAGCGAAATGCACCCCGCATTACGTTTGGTGGACCCTCAGATTCA           | 28342 |
| gb:MN988713 | Organism: Severe | AATGGACCCCAAAATCAGCGAAATGCACCCCGCATTACGTTTGGTGGACCCTCAGATTCA           | 28342 |
| gb:LC521925 | Organism: Severe | AATGGACCCCAAAATCAGCGAAATGCACCCCGCATTACGTTTGGTGGACCCTCAGATTCA           | 28315 |
| gb:MT093571 | Organism: Severe | AATGGACCCCAAAATCAGCGAAATGCACCCCGCATTACGTTTGGTGGACCCTCAGATTCA           | 28342 |
| gb:MT039887 | Organism: Severe | AATGGACCCCAAAATCAGCGAAATGCACCCCGCATTACGTTTGGTGGACCCTCAGATTCA           | 28339 |
| gb:MT019530 | Organism: Severe | AATGGACCCCAAAATCAGCGAAATGCACCCCGCATTACGTTTGGTGGACCCTCAGATTCA           | 28342 |
| gb:MT039888 | Organism: Severe | AATGGACCCCAAAATCAGCGAAATGCACCCCGCATTACGTTTGGTGGACCCTCAGATTCA           | 28342 |
| gb:LC522972 | Organism: Severe | AATGGACCCCAAAATCAGCGAAATGCACCCCGCATTACGTTTGGTGGACCCTCAGATTCA           | 28339 |
| gb:MT027063 | Organism: Severe | AATGGACCCCAAAATCAGCGAAATGCACCCCGCATTACGTTTGGTGGACCCTCAGATTCA           | 28342 |
| gb:MT027062 | Organism: Severe | AATGGACCCCAAAATCAGCGAAATGCACCCCGCATTACGTTTGGTGGACCCTCAGATTCA           | 28342 |
| gb:MT019529 | Organism: Severe | AATGGACCCCAAAATCAGCGAAATGCACCCCGCATTACGTTTGGTGGACCCTCAGATTCA           | 28342 |
| gb:MN996529 | Organism: Severe | AATGGACCCCAAAATCAGCGAAATGCACCCCGCATTACGTTTGGTGGACCCTCAGATTCA           | 28330 |
| gb:MN996531 | Organism: Severe | AATGGACCCCAAAATCAGCGAAATGCACCCCGCATTACGTTTGGTGGACCCTCAGATTCA           | 28329 |
| gb:MT066176 | Organism: Severe | AATGGACCCCAAAATCAGCGAAATGCACCCCGCATTACGTTTGGTGGACCCTCAGATTCA           | 28342 |
| gb:MT027064 | Organism: Severe | AATGGACCCCAAAATCAGCGAAATGCACCCCGCATTACGTTTGGTGGACCCTCAGATTCA           | 28342 |
| gb:MN994468 | Organism: Severe | AATGGACCCCAAAATCAGCGAAATGCACCCCGCATTACGTTTGGTGGACCCTCAGATTCA           | 28342 |
| gb:MT072688 | Organism: Severe | AATGGACCCCAAAATCAGCGAAATGCACCCCGCATTACGTTTGGTGGACCCTCAGATTCA           | 28327 |
| gb:MN996527 | Organism: Severe | AATGGACCCCAAAATCAGCGAAATGCACCCCGCATTACGTTTGGTGGACCCTCAGATTCA           | 28309 |
| gb:MT093631 | Organism: Severe | AATGGACCCCAAAATCAGCGAAATGCACCCCGCATTACGTTTGGTGGACCCTCAGATTCA           | 28380 |
| gb:MT106053 | Organism: Severe | AATGGACCCCAAAATCAGCGAAATGCACCCCGCATTACGTTTGGTGGACCCTCAGATTCA           | 28342 |
| gb:MT019533 | Organism: Severe | AATGGACCCCAAAATCAGCGAAATGCACCCCGCATTACGTTTGGTGGACCCTCAGATTCA           | 28342 |
| gb:MT019531 | Organism: Severe | AATGGACCCCAAAATCAGCGAAATGCACCCCGCATTACGTTTGGTGGACCCTCAGATTCA           | 28342 |
| gb:MN996528 | Organism: Severe | AATGGACCCCAAAATCAGCGAAATGCACCCCGCATTACGTTTGGTGGACCCTCAGATTCA           | 28342 |
| gb:MN996530 | Organism: Severe | AATGGACCCCAAAATCAGCGAAATGCACCCCGCATTACGTTTGGTGGACCCTCAGATTCA           | 28328 |
| gb:MN908947 | Organism: Severe | AATGGACCCCAAAATCAGCGAAATGCACCCCGCATTACGTTTGGTGGACCCTCAGATTCA           | 28342 |
| gb:MT019532 | Organism: Severe | AATGGACCCCAAAATCAGCGAAATGCACCCCGCATTACGTTTGGTGGACCCTCAGATTCA<br>*****  | 28342 |
| gb:MT020781 | Organism: Severe | ACTGGCAGTAACCAGAAATGGAGAACGCAGTGGGGCGCGATCAAACAACGTGGCCCCAA            | 28390 |
| gb:MT007544 | Organism: Severe | ACTGGCAGTAACCAGAAATGGAGAACGCAGTGGGGCGCGATCAAACAACGTGGCCCCAA            | 28402 |
| gb:MN994467 | Organism: Severe | ACTGGCAGTAACCAGAAATGGAGAACGCAGTGGGGCGCGATCAAACAACGTGGCCCCAA            | 28402 |
| gb:MT044257 | Organism: Severe | ACTGGCAGTAACCAGAAATGGAGAACGCAGTGGGGCGCGATCAAACAACGTGGCCCCAA            | 28402 |
| gb:MT106054 | Organism: Severe | ACTGGCAGTAACCAGAAATGGAGAACGCAGTGGGGCGCGATCAAACAACGTGGCCCCAA            | 28402 |
| gb:MT049951 | Organism: Severe | ACTGGCAGTAACCAGAAATGGAGAACGCAGTGGGGCGCGATCAAACAACGTGGCCCCAA            | 28402 |
| gb:MN975262 | Organism: Severe | ACTGGCAGTAACCAGAAATGGAGAACGCAGTGGGGCGCGATCAAACAACGTGGCCCCAA            | 28402 |
| gb:MT106052 | Organism: Severe | ACTGGCAGTAACCAGAAATGGAGAACGCAGTGGGGCGCGATCAAACAACGTGGCCCCAA            | 28402 |
| gb:LC522975 | Organism: Severe | ACTGGCAGTAACCAGAAATGGAGAACGCAGTGGGGCGCGATCAAACAACGTGGCCCCAA            | 28399 |
| gb:LC522973 | Organism: Severe | ACTGGCAGTAACCAGAAATGGAGAACGCAGTGGGGCGCGATCAAACAACGTGGCCCCAA            | 28399 |
| gb:LC522974 | Organism: Severe | ACTGGCAGTAACCAGAAATGGAGAACGCAGTGGGGCGCGATCAAACAACGTGGCCCCAA            | 28399 |
| gb:MN985325 | Organism: Severe | ACTGGCAGTAACCAGAAATGGAGAACGCAGTGGGGCGCGATCAAACAACGTGGCCCCAA            | 28402 |
| gb:MT020881 | Organism: Severe | ACTGGCAGTAACCAGAAATGGAGAACGCAGTGGGGCGCGATCAAACAACGTGGCCCCAA            | 28402 |



|             |                 |                                                                |       |
|-------------|-----------------|----------------------------------------------------------------|-------|
| gb:MT020880 | Organism:Severe | ACTGGCAGTAACCAGAAATGGAGAACGCAGTGGGGCGCGATCAAAAACAACGTCGGCCCCAA | 28402 |
| gb:MT066175 | Organism:Severe | ACTGGCAGTAACCAGAAATGGAGAACGCAGTGGGGCGCGATCAAAAACAACGTCGGCCCCAA | 28402 |
| gb:MN997409 | Organism:Severe | ACTGGCAGTAACCAGAAATGGAGAACGCAGTGGGGCGCGATCAAAAACAACGTCGGCCCCAA | 28402 |
| gb:MN938384 | Organism:Severe | ACTGGCAGTAACCAGAAATGGAGAACGCAGTGGGGCGCGATCAAAAACAACGTCGGCCCCAA | 28370 |
| gb:MT044258 | Organism:Severe | ACTGGCAGTAACCAGAAATGGAGAACGCAGTGGGGCGCGATCAAAAACAACGTCGGCCCCAA | 28378 |
| gb:MT039890 | Organism:Severe | ACTGGCAGTAACCAGAAATGGAGAACGCAGTGGGGCGCGATCAAAAACAACGTCGGCCCCAA | 28402 |
| gb:MN988713 | Organism:Severe | ACTGGCAGTAACCAGAAATGGAGAACGCAGTGGGGCGCGATCAAAAACAACGTCGGCCCCAA | 28402 |
| gb:LC521925 | Organism:Severe | ACTGGCAGTAACCAGAAATGGAGAACGCAGTGGGGCGCGATCAAAAACAACGTCGGCCCCAA | 28375 |
| gb:MT093571 | Organism:Severe | ACTGGCAGTAACCAGAAATGGAGAACGCAGTGGGGCGCGATCAAAAACAACGTCGGCCCCAA | 28402 |
| gb:MT039887 | Organism:Severe | ACTGGCAGTAACCAGAAATGGAGAACGCAGTGGGGCGCGATCAAAAACAACGTCGGCCCCAA | 28399 |
| gb:MT019530 | Organism:Severe | ACTGGCAGTAACCAGAAATGGAGAACGCAGTGGGGCGCGATCAAAAACAACGTCGGCCCCAA | 28402 |
| gb:MT039888 | Organism:Severe | ACTGGCAGTAACCAGAAATGGAGAACGCAGTGGGGCGCGATCAAAAACAACGTCGGCCCCAA | 28402 |
| gb:LC522972 | Organism:Severe | ACTGGCAGTAACCAGAAATGGAGAACGCAGTGGGGCGCGATCAAAAACAACGTCGGCCCCAA | 28399 |
| gb:MT027063 | Organism:Severe | ACTGGCAGTAACCAGAAATGGAGAACGCAGTGGGGCGCGATCAAAAACAACGTCGGCCCCAA | 28402 |
| gb:MT027062 | Organism:Severe | ACTGGCAGTAACCAGAAATGGAGAACGCAGTGGGGCGCGATCAAAAACAACGTCGGCCCCAA | 28402 |
| gb:MT019529 | Organism:Severe | ACTGGCAGTAACCAGAAATGGAGAACGCAGTGGGGCGCGATCAAAAACAACGTCGGCCCCAA | 28402 |
| gb:MN996529 | Organism:Severe | ACTGGCAGTAACCAGAAATGGAGAACGCAGTGGGGCGCGATCAAAAACAACGTCGGCCCCAA | 28390 |
| gb:MN996531 | Organism:Severe | ACTGGCAGTAACCAGAAATGGAGAACGCAGTGGGGCGCGATCAAAAACAACGTCGGCCCCAA | 28389 |
| gb:MT066176 | Organism:Severe | ACTGGCAGTAACCAGAAATGGAGAACGCAGTGGGGCGCGATCAAAAACAACGTCGGCCCCAA | 28402 |
| gb:MT027064 | Organism:Severe | ACTGGCAGTAACCAGAAATGGAGAACGCAGTGGGGCGCGATCAAAAACAACGTCGGCCCCAA | 28402 |
| gb:MN994468 | Organism:Severe | ACTGGCAGTAACCAGAAATGGAGAACGCAGTGGGGCGCGATCAAAAACAACGTCGGCCCCAA | 28402 |
| gb:MT072688 | Organism:Severe | ACTGGCAGTAACCAGAAATGGAGAACGCAGTGGGGCGCGATCAAAAACAACGTCGGCCCCAA | 28387 |
| gb:MN996527 | Organism:Severe | ACTGGCAGTAACCAGAAATGGAGAACGCAGTGGGGCGCGATCAAAAACAACGTCGGCCCCAA | 28369 |
| gb:MT093631 | Organism:Severe | ACTGGCAGTAACCAGAAATGGAGAACGCAGTGGGGCGCGATCAAAAACAACGTCGGCCCCAA | 28440 |
| gb:MT106053 | Organism:Severe | ACTGGCAGTAACCAGAAATGGAGAACGCAGTGGGGCGCGATCAAAAACAACGTCGGCCCCAA | 28402 |
| gb:MT019533 | Organism:Severe | ACTGGCAGTAACCAGAAATGGAGAACGCAGTGGGGCGCGATCAAAAACAACGTCGGCCCCAA | 28402 |
| gb:MT019531 | Organism:Severe | ACTGGCAGTAACCAGAAATGGAGAACGCAGTGGGGCGCGATCAAAAACAACGTCGGCCCCAA | 28402 |
| gb:MN996528 | Organism:Severe | ACTGGCAGTAACCAGAAATGGAGAACGCAGTGGGGCGCGATCAAAAACAACGTCGGCCCCAA | 28402 |
| gb:MN996530 | Organism:Severe | ACTGGCAGTAACCAGAAATGGAGAACGCAGTGGGGCGCGATCAAAAACAACGTCGGCCCCAA | 28388 |
| gb:MN908947 | Organism:Severe | ACTGGCAGTAACCAGAAATGGAGAACGCAGTGGGGCGCGATCAAAAACAACGTCGGCCCCAA | 28402 |
| gb:MT019532 | Organism:Severe | ACTGGCAGTAACCAGAAATGGAGAACGCAGTGGGGCGCGATCAAAAACAACGTCGGCCCCAA | 28402 |

\*\*\*\*\*

|             |                 |                                                             |       |
|-------------|-----------------|-------------------------------------------------------------|-------|
| gb:MT020781 | Organism:Severe | GGTTTACCAATAATACTGCGTCTTGGTTCACCGCTCTCACTCAACATGGCAAGGAAGAC | 28450 |
| gb:MT007544 | Organism:Severe | GGTTTACCAATAATACTGCGTCTTGGTTCACCGCTCTCACTCAACATGGCAAGGAAGAC | 28462 |
| gb:MN994467 | Organism:Severe | GGTTTACCAATAATACTGCGTCTTGGTTCACCGCTCTCACTCAACATGGCAAGGAAGAC | 28462 |
| gb:MT044257 | Organism:Severe | GGTTTACCAATAATACTGCGTCTTGGTTCACCGCTCTCACTCAACATGGCAAGGAAGAC | 28462 |
| gb:MT106054 | Organism:Severe | GGTTTACCAATAATACTGCGTCTTGGTTCACCGCTCTCACTCAACATGGCAAGGAAGAC | 28462 |
| gb:MT049951 | Organism:Severe | GGTTTACCAATAATACTGCGTCTTGGTTCACCGCTCTCACTCAACATGGCAAGGAAGAC | 28462 |
| gb:MN975262 | Organism:Severe | GGTTTACCAATAATACTGCGTCTTGGTTCACCGCTCTCACTCAACATGGCAAGGAAGAC | 28462 |
| gb:MT106052 | Organism:Severe | GGTTTACCAATAATACTGCGTCTTGGTTCACCGCTCTCACTCAACATGGCAAGGAAGAC | 28462 |
| gb:LC522975 | Organism:Severe | GGTTTACCAATAATACTGCGTCTTGGTTCACCGCTCTCACTCAACATGGCAAGGAAGAC | 28459 |
| gb:LC522973 | Organism:Severe | GGTTTACCAATAATACTGCGTCTTGGTTCACCGCTCTCACTCAACATGGCAAGGAAGAC | 28459 |
| gb:LC522974 | Organism:Severe | GGTTTACCAATAATACTGCGTCTTGGTTCACCGCTCTCACTCAACATGGCAAGGAAGAC | 28459 |
| gb:MN985325 | Organism:Severe | GGTTTACCAATAATACTGCGTCTTGGTTCACCGCTCTCACTCAACATGGCAAGGAAGAC | 28462 |
| gb:MT020881 | Organism:Severe | GGTTTACCAATAATACTGCGTCTTGGTTCACCGCTCTCACTCAACATGGCAAGGAAGAC | 28462 |
| gb:MT020880 | Organism:Severe | GGTTTACCAATAATACTGCGTCTTGGTTCACCGCTCTCACTCAACATGGCAAGGAAGAC | 28462 |
| gb:MT066175 | Organism:Severe | GGTTTACCAATAATACTGCGTCTTGGTTCACCGCTCTCACTCAACATGGCAAGGAAGAC | 28462 |
| gb:MN997409 | Organism:Severe | GGTTTACCAATAATACTGCGTCTTGGTTCACCGCTCTCACTCAACATGGCAAGGAAGAC | 28462 |
| gb:MN938384 | Organism:Severe | GGTTTACCAATAATACTGCGTCTTGGTTCACCGCTCTCACTCAACATGGCAAGGAAGAC | 28430 |
| gb:MT044258 | Organism:Severe | GGTTTACCAATAATACTGCGTCTTGGTTCACCGCTCTCACTCAACATGGCAAGGAAGAC | 28438 |
| gb:MT039890 | Organism:Severe | GGTTTACCAATAATACTGCGTCTTGGTTCACCGCTCTCACTCAACATGGCAAGGAAGAC | 28462 |
| gb:MN988713 | Organism:Severe | GGTTTACCAATAATACTGCGTCTTGGTTCACCGCTCTCACTCAACATGGCAAGGAAGAC | 28462 |
| gb:LC521925 | Organism:Severe | GGTTTACCAATAATACTGCGTCTTGGTTCACCGCTCTCACTCAACATGGCAAGGAAGAC | 28435 |
| gb:MT093571 | Organism:Severe | GGTTTACCAATAATACTGCGTCTTGGTTCACCGCTCTCACTCAACATGGCAAGGAAGAC | 28462 |
| gb:MT039887 | Organism:Severe | GGTTTACCAATAATACTGCGTCTTGGTTCACCGCTCTCACTCAACATGGCAAGGAAGAC | 28459 |
| gb:MT019530 | Organism:Severe | GGTTTACCAATAATACTGCGTCTTGGTTCACCGCTCTCACTCAACATGGCAAGGAAGAC | 28462 |
| gb:MT039888 | Organism:Severe | GGTTTACCAATAATACTGCGTCTTGGTTCACCGCTCTCACTCAACATGGCAAGGAAGAC | 28462 |
| gb:LC522972 | Organism:Severe | GGTTTACCAATAATACTGCGTCTTGGTTCACCGCTCTCACTCAACATGGCAAGGAAGAC | 28459 |
| gb:MT027063 | Organism:Severe | GGTTTACCAATAATACTGCGTCTTGGTTCACCGCTCTCACTCAACATGGCAAGGAAGAC | 28462 |
| gb:MT027062 | Organism:Severe | GGTTTACCAATAATACTGCGTCTTGGTTCACCGCTCTCACTCAACATGGCAAGGAAGAC | 28462 |
| gb:MT019529 | Organism:Severe | GGTTTACCAATAATACTGCGTCTTGGTTCACCGCTCTCACTCAACATGGCAAGGAAGAC | 28462 |
| gb:MN996529 | Organism:Severe | GGTTTACCAATAATACTGCGTCTTGGTTCACCGCTCTCACTCAACATGGCAAGGAAGAC | 28450 |
| gb:MN996531 | Organism:Severe | GGTTTACCAATAATACTGCGTCTTGGTTCACCGCTCTCACTCAACATGGCAAGGAAGAC | 28449 |
| gb:MT066176 | Organism:Severe | GGTTTACCAATAATACTGCGTCTTGGTTCACCGCTCTCACTCAACATGGCAAGGAAGAC | 28462 |

|             |                 |                                                            |       |
|-------------|-----------------|------------------------------------------------------------|-------|
| gb:MT027064 | Organism:Severe | GGTTTACCCAATAACTGCGTCTTGGTTCACCGCTCTCACTCAACATGGCAAGGAAGAC | 28462 |
| gb:MN994468 | Organism:Severe | GGTTTACCCAATAACTGCGTCTTGGTTCACCGCTCTCACTCAACATGGCAAGGAAGAC | 28462 |
| gb:MT072688 | Organism:Severe | GGTTTACCCAATAACTGCGTCTTGGTTCACCGCTCTCACTCAACATGGCAAGGAAGAC | 28447 |
| gb:MN996527 | Organism:Severe | GGTTTACCCAATAACTGCGTCTTGGTTCACCGCTCTCACTCAACATGGCAAGGAAGAC | 28429 |
| gb:MT093631 | Organism:Severe | GGTTTACCCAATAACTGCGTCTTGGTTCACCGCTCTCACTCAACATGGCAAGGAAGAC | 28500 |
| gb:MT106053 | Organism:Severe | GGTTTACCCAATAACTGCGTCTTGGTTCACCGCTCTCACTCAACATGGCAAGGAAGAC | 28462 |
| gb:MT019533 | Organism:Severe | GGTTTACCCAATAACTGCGTCTTGGTTCACCGCTCTCACTCAACATGGCAAGGAAGAC | 28462 |
| gb:MT019531 | Organism:Severe | GGTTTACCCAATAACTGCGTCTTGGTTCACCGCTCTCACTCAACATGGCAAGGAAGAC | 28462 |
| gb:MN996528 | Organism:Severe | GGTTTACCCAATAACTGCGTCTTGGTTCACCGCTCTCACTCAACATGGCAAGGAAGAC | 28462 |
| gb:MN996530 | Organism:Severe | GGTTTACCCAATAACTGCGTCTTGGTTCACCGCTCTCACTCAACATGGCAAGGAAGAC | 28448 |
| gb:MN908947 | Organism:Severe | GGTTTACCCAATAACTGCGTCTTGGTTCACCGCTCTCACTCAACATGGCAAGGAAGAC | 28462 |
| gb:MT019532 | Organism:Severe | GGTTTACCCAATAACTGCGTCTTGGTTCACCGCTCTCACTCAACATGGCAAGGAAGAC | 28462 |

\*\*\*\*\*

|             |                 |                                                             |       |
|-------------|-----------------|-------------------------------------------------------------|-------|
| gb:MT020781 | Organism:Severe | CTTAAATTCCTCGAGGACAAGGCGTTCCAATTAACACCAATAGCAGTCCAGATGACCAA | 28510 |
| gb:MT007544 | Organism:Severe | CTTAAATTCCTCGAGGACAAGGCGTTCCAATTAACACCAATAGCAGTCCAGATGACCAA | 28522 |
| gb:MN994467 | Organism:Severe | CTTAAATTCCTCGAGGACAAGGCGTTCCAATTAACACCAATAGCAGTCCAGATGACCAA | 28522 |
| gb:MT044257 | Organism:Severe | CTTAAATTCCTCGAGGACAAGGCGTTCCAATTAACACCAATAGCAGTCCAGATGACCAA | 28522 |
| gb:MT106054 | Organism:Severe | CTTAAATTCCTCGAGGACAAGGCGTTCCAATTAACACCAATAGCAGTCCAGATGACCAA | 28522 |
| gb:MT049951 | Organism:Severe | CTTAAATTCCTCGAGGACAAGGCGTTCCAATTAACACCAATAGCAGTCCAGATGACCAA | 28522 |
| gb:MN975262 | Organism:Severe | CTTAAATTCCTCGAGGACAAGGCGTTCCAATTAACACCAATAGCAGTCCAGATGACCAA | 28522 |
| gb:MT106052 | Organism:Severe | CTTAAATTCCTCGAGGACAAGGCGTTCCAATTAACACCAATAGCAGTCCAGATGACCAA | 28522 |
| gb:LC522975 | Organism:Severe | CTTAAATTCCTCGAGGACAAGGCGTTCCAATTAACACCAATAGCAGTCCAGATGACCAA | 28519 |
| gb:LC522973 | Organism:Severe | CTTAAATTCCTCGAGGACAAGGCGTTCCAATTAACACCAATAGCAGTCCAGATGACCAA | 28519 |
| gb:LC522974 | Organism:Severe | CTTAAATTCCTCGAGGACAAGGCGTTCCAATTAACACCAATAGCAGTCCAGATGACCAA | 28519 |
| gb:MN985325 | Organism:Severe | CTTAAATTCCTCGAGGACAAGGCGTTCCAATTAACACCAATAGCAGTCCAGATGACCAA | 28522 |
| gb:MT020881 | Organism:Severe | CTTAAATTCCTCGAGGACAAGGCGTTCCAATTAACACCAATAGCAGTCCAGATGACCAA | 28522 |
| gb:MT020880 | Organism:Severe | CTTAAATTCCTCGAGGACAAGGCGTTCCAATTAACACCAATAGCAGTCCAGATGACCAA | 28522 |
| gb:MT066175 | Organism:Severe | CTTAAATTCCTCGAGGACAAGGCGTTCCAATTAACACCAATAGCAGTCCAGATGACCAA | 28522 |
| gb:MN997409 | Organism:Severe | CTTAAATTCCTCGAGGACAAGGCGTTCCAATTAACACCAATAGCAGTCCAGATGACCAA | 28522 |
| gb:MN938384 | Organism:Severe | CTTAAATTCCTCGAGGACAAGGCGTTCCAATTAACACCAATAGCAGTCCAGATGACCAA | 28490 |
| gb:MT044258 | Organism:Severe | CTTAAATTCCTCGAGGACAAGGCGTTCCAATTAACACCAATAGCAGTCCAGATGACCAA | 28498 |
| gb:MT039890 | Organism:Severe | CTTAAATTCCTCGAGGACAAGGCGTTCCAATTAACACCAATAGCAGTCCAGATGACCAA | 28522 |
| gb:MN988713 | Organism:Severe | CTTAAATTCCTCGAGGACAAGGCGTTCCAATTAACACCAATAGCAGTCCAGATGACCAA | 28522 |
| gb:LC521925 | Organism:Severe | CTTAAATTCCTCGAGGACAAGGCGTTCCAATTAACACCAATAGCAGTCCAGATGACCAA | 28495 |
| gb:MT093571 | Organism:Severe | CTTAAATTCCTCGAGGACAAGGCGTTCCAATTAACACCAATAGCAGTCCAGATGACCAA | 28522 |
| gb:MT039887 | Organism:Severe | CTTAAATTCCTCGAGGACAAGGCGTTCCAATTAACACCAATAGCAGTCCAGATGACCAA | 28519 |
| gb:MT019530 | Organism:Severe | CTTAAATTCCTCGAGGACAAGGCGTTCCAATTAACACCAATAGCAGTCCAGATGACCAA | 28522 |
| gb:MT039888 | Organism:Severe | CTTAAATTCCTCGAGGACAAGGCGTTCCAATTAACACCAATAGCAGTCCAGATGACCAA | 28522 |
| gb:LC522972 | Organism:Severe | CTTAAATTCCTCGAGGACAAGGCGTTCCAATTAACACCAATAGCAGTCCAGATGACCAA | 28519 |
| gb:MT027063 | Organism:Severe | CTTAAATTCCTCGAGGACAAGGCGTTCCAATTAACACCAATAGCAGTCCAGATGACCAA | 28522 |
| gb:MT027062 | Organism:Severe | CTTAAATTCCTCGAGGACAAGGCGTTCCAATTAACACCAATAGCAGTCCAGATGACCAA | 28522 |
| gb:MT019529 | Organism:Severe | CTTAAATTCCTCGAGGACAAGGCGTTCCAATTAACACCAATAGCAGTCCAGATGACCAA | 28522 |
| gb:MN996529 | Organism:Severe | CTTAAATTCCTCGAGGACAAGGCGTTCCAATTAACACCAATAGCAGTCCAGATGACCAA | 28510 |
| gb:MN996531 | Organism:Severe | CTTAAATTCCTCGAGGACAAGGCGTTCCAATTAACACCAATAGCAGTCCAGATGACCAA | 28509 |
| gb:MT066176 | Organism:Severe | CTTAAATTCCTCGAGGACAAGGCGTTCCAATTAACACCAATAGCAGTCCAGATGACCAA | 28522 |
| gb:MT027064 | Organism:Severe | CTTAAATTCCTCGAGGACAAGGCGTTCCAATTAACACCAATAGCAGTCCAGATGACCAA | 28522 |
| gb:MN994468 | Organism:Severe | CTTAAATTCCTCGAGGACAAGGCGTTCCAATTAACACCAATAGCAGTCCAGATGACCAA | 28522 |
| gb:MT072688 | Organism:Severe | CTTAAATTCCTCGAGGACAAGGCGTTCCAATTAACACCAATAGCAGTCCAGATGACCAA | 28507 |
| gb:MN996527 | Organism:Severe | CTTAAATTCCTCGAGGACAAGGCGTTCCAATTAACACCAATAGCAGTCCAGATGACCAA | 28489 |
| gb:MT093631 | Organism:Severe | CTTAAATTCCTCGAGGACAAGGCGTTCCAATTAACACCAATAGCAGTCCAGATGACCAA | 28560 |
| gb:MT106053 | Organism:Severe | CTTAAATTCCTCGAGGACAAGGCGTTCCAATTAACACCAATAGCAGTCCAGATGACCAA | 28522 |
| gb:MT019533 | Organism:Severe | CTTAAATTCCTCGAGGACAAGGCGTTCCAATTAACACCAATAGCAGTCCAGATGACCAA | 28522 |
| gb:MT019531 | Organism:Severe | CTTAAATTCCTCGAGGACAAGGCGTTCCAATTAACACCAATAGCAGTCCAGATGACCAA | 28522 |
| gb:MN996528 | Organism:Severe | CTTAAATTCCTCGAGGACAAGGCGTTCCAATTAACACCAATAGCAGTCCAGATGACCAA | 28522 |
| gb:MN996530 | Organism:Severe | CTTAAATTCCTCGAGGACAAGGCGTTCCAATTAACACCAATAGCAGTCCAGATGACCAA | 28508 |
| gb:MN908947 | Organism:Severe | CTTAAATTCCTCGAGGACAAGGCGTTCCAATTAACACCAATAGCAGTCCAGATGACCAA | 28522 |
| gb:MT019532 | Organism:Severe | CTTAAATTCCTCGAGGACAAGGCGTTCCAATTAACACCAATAGCAGTCCAGATGACCAA | 28522 |

\*\*\*\*\*

|             |                 |                                                              |       |
|-------------|-----------------|--------------------------------------------------------------|-------|
| gb:MT020781 | Organism:Severe | ATTGGCTACTACCGAAGAGCTACCAGACGAATTCGTGGTGGTGACGGTAAAATGAAAGAT | 28570 |
| gb:MT007544 | Organism:Severe | ATTGGCTACTACCGAAGAGCTACCAGACGAATTCGTGGTGGTGACGGTAAAATGAAAGAT | 28582 |
| gb:MN994467 | Organism:Severe | ATTGGCTACTACCGAAGAGCTACCAGACGAATTCGTGGTGGTGACGGTAAAATGAAAGAT | 28582 |
| gb:MT044257 | Organism:Severe | ATTGGCTACTACCGAAGAGCTACCAGACGAATTCGTGGTGGTGACGGTAAAATGAAAGAT | 28582 |
| gb:MT106054 | Organism:Severe | ATTGGCTACTACCGAAGAGCTACCAGACGAATTCGTGGTGGTGACGGTAAAATGAAAGAT | 28582 |



|             |                 |                                                              |       |
|-------------|-----------------|--------------------------------------------------------------|-------|
| gb:MT039888 | Organism:Severe | CTCAGTCCAAGATGGTATTTCTACTACCTAGGAACTGGGCCAGAAGCTGGACTTCCCTAT | 28642 |
| gb:LC522972 | Organism:Severe | CTCAGTCCAAGATGGTATTTCTACTACCTAGGAACTGGGCCAGAAGCTGGACTTCCCTAT | 28639 |
| gb:MT027063 | Organism:Severe | CTCAGTCCAAGATGGTATTTCTACTACCTAGGAACTGGGCCAGAAGCTGGACTTCCCTAT | 28642 |
| gb:MT027062 | Organism:Severe | CTCAGTCCAAGATGGTATTTCTACTACCTAGGAACTGGGCCAGAAGCTGGACTTCCCTAT | 28642 |
| gb:MT019529 | Organism:Severe | CTCAGTCCAAGATGGTATTTCTACTACCTAGGAACTGGGCCAGAAGCTGGACTTCCCTAT | 28642 |
| gb:MN996529 | Organism:Severe | CTCAGTCCAAGATGGTATTTCTACTACCTAGGAACTGGGCCAGAAGCTGGACTTCCCTAT | 28630 |
| gb:MN996531 | Organism:Severe | CTCAGTCCAAGATGGTATTTCTACTACCTAGGAACTGGGCCAGAAGCTGGACTTCCCTAT | 28629 |
| gb:MT066176 | Organism:Severe | CTCAGTCCAAGATGGTATTTCTACTACCTAGGAACTGGGCCAGAAGCTGGACTTCCCTAT | 28642 |
| gb:MT027064 | Organism:Severe | CTCAGTCCAAGATGGTATTTCTACTACCTAGGAACTGGGCCAGAAGCTGGACTTCCCTAT | 28642 |
| gb:MN994468 | Organism:Severe | CTCAGTCCAAGATGGTATTTCTACTACCTAGGAACTGGGCCAGAAGCTGGACTTCCCTAT | 28642 |
| gb:MT072688 | Organism:Severe | CTCAGTCCAAGATGGTATTTCTACTACCTAGGAACTGGGCCAGAAGCTGGACTTCCCTAT | 28627 |
| gb:MN996527 | Organism:Severe | CTCAGTCCAAGATGGTATTTCTACTACCTAGGAACTGGGCCAGAAGCTGGACTTCCCTAT | 28609 |
| gb:MT093631 | Organism:Severe | CTCAGTCCAAGATGGTATTTCTACTACCTAGGAACTGGGCCAGAAGCTGGACTTCCCTAT | 28680 |
| gb:MT106053 | Organism:Severe | CTCAGTCCAAGATGGTATTTCTACTACCTAGGAACTGGGCCAGAAGCTGGACTTCCCTAT | 28642 |
| gb:MT019533 | Organism:Severe | CTCAGTCCAAGATGGTATTTCTACTACCTAGGAACTGGGCCAGAAGCTGGACTTCCCTAT | 28642 |
| gb:MT019531 | Organism:Severe | CTCAGTCCAAGATGGTATTTCTACTACCTAGGAACTGGGCCAGAAGCTGGACTTCCCTAT | 28642 |
| gb:MN996528 | Organism:Severe | CTCAGTCCAAGATGGTATTTCTACTACCTAGGAACTGGGCCAGAAGCTGGACTTCCCTAT | 28642 |
| gb:MN996530 | Organism:Severe | CTCAGTCCAAGATGGTATTTCTACTACCTAGGAACTGGGCCAGAAGCTGGACTTCCCTAT | 28628 |
| gb:MN908947 | Organism:Severe | CTCAGTCCAAGATGGTATTTCTACTACCTAGGAACTGGGCCAGAAGCTGGACTTCCCTAT | 28642 |
| gb:MT019532 | Organism:Severe | CTCAGTCCAAGATGGTATTTCTACTACCTAGGAACTGGGCCAGAAGCTGGACTTCCCTAT | 28642 |

\*\*\*\*\*

|             |                 |                                                              |       |
|-------------|-----------------|--------------------------------------------------------------|-------|
| gb:MT020781 | Organism:Severe | GGTGCTAACAAAGACGGCATCATATGGGTTGCAACTGAGGGAGCCTTGAATACACCAAAA | 28690 |
| gb:MT007544 | Organism:Severe | GGTGCTAACAAAGACGGCATCATATGGGTTGCAACTGAGGGAGCCTTGAATACACCAAAA | 28702 |
| gb:MN994467 | Organism:Severe | GGTGCTAACAAAGACGGCATCATATGGGTTGCAACTGAGGGAGCCTTGAATACACCAAAA | 28702 |
| gb:MT044257 | Organism:Severe | GGTGCTAACAAAGACGGCATCATATGGGTTGCAACTGAGGGAGCCTTGAATACACCAAAA | 28702 |
| gb:MT106054 | Organism:Severe | GGTGCTAACAAAGACGGCATCATATGGGTTGCAACTGAGGGAGCCTTGAATACACCAAAA | 28702 |
| gb:MT049951 | Organism:Severe | GGTGCTAACAAAGACGGCATCATATGGGTTGCAACTGAGGGAGCCTTGAATACACCAAAA | 28702 |
| gb:MN975262 | Organism:Severe | GGTGCTAACAAAGACGGCATCATATGGGTTGCAACTGAGGGAGCCTTGAATACACCAAAA | 28702 |
| gb:MT106052 | Organism:Severe | GGTGCTAACAAAGACGGCATCATATGGGTTGCAACTGAGGGAGCCTTGAATACACCAAAA | 28702 |
| gb:LC522975 | Organism:Severe | GGTGCTAACAAAGACGGCATCATATGGGTTGCAACTGAGGGAGCCTTGAATACACCAAAA | 28699 |
| gb:LC522973 | Organism:Severe | GGTGCTAACAAAGACGGCATCATATGGGTTGCAACTGAGGGAGCCTTGAATACACCAAAA | 28699 |
| gb:LC522974 | Organism:Severe | GGTGCTAACAAAGACGGCATCATATGGGTTGCAACTGAGGGAGCCTTGAATACACCAAAA | 28699 |
| gb:MN985325 | Organism:Severe | GGTGCTAACAAAGACGGCATCATATGGGTTGCAACTGAGGGAGCCTTGAATACACCAAAA | 28702 |
| gb:MT020881 | Organism:Severe | GGTGCTAACAAAGACGGCATCATATGGGTTGCAACTGAGGGAGCCTTGAATACACCAAAA | 28702 |
| gb:MT020880 | Organism:Severe | GGTGCTAACAAAGACGGCATCATATGGGTTGCAACTGAGGGAGCCTTGAATACACCAAAA | 28702 |
| gb:MT066175 | Organism:Severe | GGTGCTAACAAAGACGGCATCATATGGGTTGCAACTGAGGGAGCCTTGAATACACCAAAA | 28702 |
| gb:MN997409 | Organism:Severe | GGTGCTAACAAAGACGGCATCATATGGGTTGCAACTGAGGGAGCCTTGAATACACCAAAA | 28702 |
| gb:MN938384 | Organism:Severe | GGTGCTAACAAAGACGGCATCATATGGGTTGCAACTGAGGGAGCCTTGAATACACCAAAA | 28670 |
| gb:MT044258 | Organism:Severe | GGTGCTAACAAAGACGGCATCATATGGGTTGCAACTGAGGGAGCCTTGAATACACCAAAA | 28678 |
| gb:MT039890 | Organism:Severe | GGTGCTAACAAAGACGGCATCATATGGGTTGCAACTGAGGGAGCCTTGAATACACCAAAA | 28702 |
| gb:MN988713 | Organism:Severe | GGTGCTAACAAAGACGGCATCATATGGGTTGCAACTGAGGGAGCCTTGAATACACCAAAA | 28702 |
| gb:LC521925 | Organism:Severe | GGTGCTAACAAAGACGGCATCATATGGGTTGCAACTGAGGGAGCCTTGAATACACCAAAA | 28675 |
| gb:MT093571 | Organism:Severe | GGTGCTAACAAAGACGGCATCATATGGGTTGCAACTGAGGGAGCCTTGAATACACCAAAA | 28702 |
| gb:MT039887 | Organism:Severe | GGTGCTAACAAAGACGGCATCATATGGGTTGCAACTGAGGGAGCCTTGAATACACCAAAA | 28699 |
| gb:MT019530 | Organism:Severe | GGTGCTAACAAAGACGGCATCATATGGGTTGCAACTGAGGGAGCCTTGAATACACCAAAA | 28702 |
| gb:MT039888 | Organism:Severe | GGTGCTAACAAAGACGGCATCATATGGGTTGCAACTGAGGGAGCCTTGAATACACCAAAA | 28702 |
| gb:LC522972 | Organism:Severe | GGTGCTAACAAAGACGGCATCATATGGGTTGCAACTGAGGGAGCCTTGAATACACCAAAA | 28699 |
| gb:MT027063 | Organism:Severe | GGTGCTAACAAAGACGGCATCATATGGGTTGCAACTGAGGGAGCCTTGAATACACCAAAA | 28702 |
| gb:MT027062 | Organism:Severe | GGTGCTAACAAAGACGGCATCATATGGGTTGCAACTGAGGGAGCCTTGAATACACCAAAA | 28702 |
| gb:MT019529 | Organism:Severe | GGTGCTAACAAAGACGGCATCATATGGGTTGCAACTGAGGGAGCCTTGAATACACCAAAA | 28702 |
| gb:MN996529 | Organism:Severe | GGTGCTAACAAAGACGGCATCATATGGGTTGCAACTGAGGGAGCCTTGAATACACCAAAA | 28690 |
| gb:MN996531 | Organism:Severe | GGTGCTAACAAAGACGGCATCATATGGGTTGCAACTGAGGGAGCCTTGAATACACCAAAA | 28689 |
| gb:MT066176 | Organism:Severe | GGTGCTAACAAAGACGGCATCATATGGGTTGCAACTGAGGGAGCCTTGAATACACCAAAA | 28702 |
| gb:MT027064 | Organism:Severe | GGTGCTAACAAAGACGGCATCATATGGGTTGCAACTGAGGGAGCCTTGAATACACCAAAA | 28702 |
| gb:MN994468 | Organism:Severe | GGTGCTAACAAAGACGGCATCATATGGGTTGCAACTGAGGGAGCCTTGAATACACCAAAA | 28702 |
| gb:MT072688 | Organism:Severe | GGTGCTAACAAAGACGGCATCATATGGGTTGCAACTGAGGGAGCCTTGAATACACCAAAA | 28687 |
| gb:MN996527 | Organism:Severe | GGTGCTAACAAAGACGGCATCATATGGGTTGCAACTGAGGGAGCCTTGAATACACCAAAA | 28669 |
| gb:MT093631 | Organism:Severe | GGTGCTAACAAAGACGGCATCATATGGGTTGCAACTGAGGGAGCCTTGAATACACCAAAA | 28740 |
| gb:MT106053 | Organism:Severe | GGTGCTAACAAAGACGGCATCATATGGGTTGCAACTGAGGGAGCCTTGAATACACCAAAA | 28702 |
| gb:MT019533 | Organism:Severe | GGTGCTAACAAAGACGGCATCATATGGGTTGCAACTGAGGGAGCCTTGAATACACCAAAA | 28702 |
| gb:MT019531 | Organism:Severe | GGTGCTAACAAAGACGGCATCATATGGGTTGCAACTGAGGGAGCCTTGAATACACCAAAA | 28702 |
| gb:MN996528 | Organism:Severe | GGTGCTAACAAAGACGGCATCATATGGGTTGCAACTGAGGGAGCCTTGAATACACCAAAA | 28702 |
| gb:MN996530 | Organism:Severe | GGTGCTAACAAAGACGGCATCATATGGGTTGCAACTGAGGGAGCCTTGAATACACCAAAA | 28688 |
| gb:MN908947 | Organism:Severe | GGTGCTAACAAAGACGGCATCATATGGGTTGCAACTGAGGGAGCCTTGAATACACCAAAA | 28702 |

|             |                  |                                                                       |       |
|-------------|------------------|-----------------------------------------------------------------------|-------|
| gb:MT019532 | Organism: Severe | GGTGCTAACAAAGACGGCATCATATGGGTTGCAACTGAGGGAGCCTTGAATACACCAAAA<br>***** | 28702 |
| gb:MT020781 | Organism: Severe | GATCACATTGGCACCCGCAATCCTGTAAACAATGTGCAATCGTGCTACAACCTCCTCAA           | 28750 |
| gb:MT007544 | Organism: Severe | GATCACATTGGCACCCGCAATCCTGTAAACAATGTGCAATCGTGCTACAACCTCCTCAA           | 28762 |
| gb:MN994467 | Organism: Severe | GATCACATTGGCACCCGCAATCCTGTAAACAATGTGCAATCGTGCTACAACCTCCTCAA           | 28762 |
| gb:MT044257 | Organism: Severe | GATCACATTGGCACCCGCAATCCTGTAAACAATGTGCAATCGTGCTACAACCTCCTCAA           | 28762 |
| gb:MT106054 | Organism: Severe | GATCACATTGGCACCCGCAATCCTGTAAACAATGTGCAATCGTGCTACAACCTCCTCAA           | 28762 |
| gb:MT049951 | Organism: Severe | GATCACATTGGCACCCGCAATCCTGTAAACAATGTGCAATCGTGCTACAACCTCCTCAA           | 28762 |
| gb:MN975262 | Organism: Severe | GATCACATTGGCACCCGCAATCCTGTAAACAATGTGCAATCGTGCTACAACCTCCTCAA           | 28762 |
| gb:MT106052 | Organism: Severe | GATCACATTGGCACCCGCAATCCTGTAAACAATGTGCAATCGTGCTACAACCTCCTCAA           | 28762 |
| gb:LC522975 | Organism: Severe | GATCACATTGGCACCCGCAATCCTGTAAACAATGTGCAATCGTGCTACAACCTCCTCAA           | 28759 |
| gb:LC522973 | Organism: Severe | GATCACATTGGCACCCGCAATCCTGTAAACAATGTGCAATCGTGCTACAACCTCCTCAA           | 28759 |
| gb:LC522974 | Organism: Severe | GATCACATTGGCACCCGCAATCCTGTAAACAATGTGCAATCGTGCTACAACCTCCTCAA           | 28759 |
| gb:MN985325 | Organism: Severe | GATCACATTGGCACCCGCAATCCTGTAAACAATGTGCAATCGTGCTACAACCTCCTCAA           | 28762 |
| gb:MT020881 | Organism: Severe | GATCACATTGGCACCCGCAATCCTGTAAACAATGTGCAATCGTGCTACAACCTCCTCAA           | 28762 |
| gb:MT020880 | Organism: Severe | GATCACATTGGCACCCGCAATCCTGTAAACAATGTGCAATCGTGCTACAACCTCCTCAA           | 28762 |
| gb:MT066175 | Organism: Severe | GATCACATTGGCACCCGCAATCCTGTAAACAATGTGCAATCGTGCTACAACCTCCTCAA           | 28762 |
| gb:MN997409 | Organism: Severe | GATCACATTGGCACCCGCAATCCTGTAAACAATGTGCAATCGTGCTACAACCTCCTCAA           | 28762 |
| gb:MN938384 | Organism: Severe | GATCACATTGGCACCCGCAATCCTGTAAACAATGTGCAATCGTGCTACAACCTCCTCAA           | 28730 |
| gb:MT044258 | Organism: Severe | GATCACATTGGCACCCGCAATCCTGTAAACAATGTGCAATCGTGCTACAACCTCCTCAA           | 28738 |
| gb:MT039890 | Organism: Severe | GATCACATTGGCACCCGCAATCCTGTAAACAATGTGCAATCGTGCTACAACCTCCTCAA           | 28762 |
| gb:MN988713 | Organism: Severe | GATCACATTGGCACCCGCAATCCTGTAAACAATGTGCAATCGTGCTACAACCTCCTCAA           | 28762 |
| gb:LC521925 | Organism: Severe | GATCACATTGGCACCCGCAATCCTGTAAACAATGTGCAATCGTGCTACAACCTCCTCAA           | 28735 |
| gb:MT093571 | Organism: Severe | GATCACATTGGCACCCGCAATCCTGTAAACAATGTGCAATCGTGCTACAACCTCCTCAA           | 28762 |
| gb:MT039887 | Organism: Severe | GATCACATTGGCACCCGCAATCCTGTAAACAATGTGCAATCGTGCTACAACCTCCTCAA           | 28759 |
| gb:MT019530 | Organism: Severe | GATCACATTGGCACCCGCAATCCTGTAAACAATGTGCAATCGTGCTACAACCTCCTCAA           | 28762 |
| gb:MT039888 | Organism: Severe | GATCACATTGGCACCCGCAATCCTGTAAACAATGTGCAATCGTGCTACAACCTCCTCAA           | 28762 |
| gb:LC522972 | Organism: Severe | GATCACATTGGCACCCGCAATCCTGTAAACAATGTGCAATCGTGCTACAACCTCCTCAA           | 28759 |
| gb:MT027063 | Organism: Severe | GATCACATTGGCACCCGCAATCCTGTAAACAATGTGCAATCGTGCTACAACCTCCTCAA           | 28762 |
| gb:MT027062 | Organism: Severe | GATCACATTGGCACCCGCAATCCTGTAAACAATGTGCAATCGTGCTACAACCTCCTCAA           | 28762 |
| gb:MT019529 | Organism: Severe | GATCACATTGGCACCCGCAATCCTGTAAACAATGTGCAATCGTGCTACAACCTCCTCAA           | 28762 |
| gb:MN996529 | Organism: Severe | GATCACATTGGCACCCGCAATCCTGTAAACAATGTGCAATCGTGCTACAACCTCCTCAA           | 28750 |
| gb:MN996531 | Organism: Severe | GATCACATTGGCACCCGCAATCCTGTAAACAATGTGCAATCGTGCTACAACCTCCTCAA           | 28749 |
| gb:MT066176 | Organism: Severe | GATCACATTGGCACCCGCAATCCTGTAAACAATGTGCAATCGTGCTACAACCTCCTCAA           | 28762 |
| gb:MT027064 | Organism: Severe | GATCACATTGGCACCCGCAATCCTGTAAACAATGTGCAATCGTGCTACAACCTCCTCAA           | 28762 |
| gb:MN994468 | Organism: Severe | GATCACATTGGCACCCGCAATCCTGTAAACAATGTGCAATCGTGCTACAACCTCCTCAA           | 28762 |
| gb:MT072688 | Organism: Severe | GATCACATTGGCACCCGCAATCCTGTAAACAATGTGCAATCGTGCTACAACCTCCTCAA           | 28747 |
| gb:MN996527 | Organism: Severe | GATCACATTGGCACCCGCAATCCTGTAAACAATGTGCAATCGTGCTACAACCTCCTCAA           | 28729 |
| gb:MT093631 | Organism: Severe | GATCACATTGGCACCCGCAATCCTGTAAACAATGTGCAATCGTGCTACAACCTCCTCAA           | 28800 |
| gb:MT106053 | Organism: Severe | GATCACATTGGCACCCGCAATCCTGTAAACAATGTGCAATCGTGCTACAACCTCCTCAA           | 28762 |
| gb:MT019533 | Organism: Severe | GATCACATTGGCACCCGCAATCCTGTAAACAATGTGCAATCGTGCTACAACCTCCTCAA           | 28762 |
| gb:MT019531 | Organism: Severe | GATCACATTGGCACCCGCAATCCTGTAAACAATGTGCAATCGTGCTACAACCTCCTCAA           | 28762 |
| gb:MN996528 | Organism: Severe | GATCACATTGGCACCCGCAATCCTGTAAACAATGTGCAATCGTGCTACAACCTCCTCAA           | 28762 |
| gb:MN996530 | Organism: Severe | GATCACATTGGCACCCGCAATCCTGTAAACAATGTGCAATCGTGCTACAACCTCCTCAA           | 28748 |
| gb:MN908947 | Organism: Severe | GATCACATTGGCACCCGCAATCCTGTAAACAATGTGCAATCGTGCTACAACCTCCTCAA           | 28762 |
| gb:MT019532 | Organism: Severe | GATCACATTGGCACCCGCAATCCTGTAAACAATGTGCAATCGTGCTACAACCTCCTCAA<br>*****  | 28762 |

|             |                  |                                                             |       |
|-------------|------------------|-------------------------------------------------------------|-------|
| gb:MT020781 | Organism: Severe | GGAACAACATTGCCAAAAGGCTTCTACGCGAAGGGAGCAGAGGCGGCAGTCAAGCCTCT | 28810 |
| gb:MT007544 | Organism: Severe | GGAACAACATTGCCAAAAGGCTTCTACGCGAAGGGAGCAGAGGCGGCAGTCAAGCCTCT | 28822 |
| gb:MN994467 | Organism: Severe | GGAACAACATTGCCAAAAGGCTTCTACGCGAAGGGAGCAGAGGCGGCAGTCAAGCCTCT | 28822 |
| gb:MT044257 | Organism: Severe | GGAACAACATTGCCAAAAGGCTTCTACGCGAAGGGAGCAGAGGCGGCAGTCAAGCCTCT | 28822 |
| gb:MT106054 | Organism: Severe | GGAACAACATTGCCAAAAGGCTTCTACGCGAAGGGAGCAGAGGCGGCAGTCAAGCCTCT | 28822 |
| gb:MT049951 | Organism: Severe | GGAACAACATTGCCAAAAGGCTTCTACGCGAAGGGAGCAGAGGCGGCAGTCAAGCCTCT | 28822 |
| gb:MN975262 | Organism: Severe | GGAACAACATTGCCAAAAGGCTTCTACGCGAAGGGAGCAGAGGCGGCAGTCAAGCCTCT | 28822 |
| gb:MT106052 | Organism: Severe | GGAACAACATTGCCAAAAGGCTTCTACGCGAAGGGAGCAGAGGCGGCAGTCAAGCCTCT | 28822 |
| gb:LC522975 | Organism: Severe | GGAACAACATTGCCAAAAGGCTTCTACGCGAAGGGAGCAGAGGCGGCAGTCAAGCCTCT | 28819 |
| gb:LC522973 | Organism: Severe | GGAACAACATTGCCAAAAGGCTTCTACGCGAAGGGAGCAGAGGCGGCAGTCAAGCCTCT | 28819 |
| gb:LC522974 | Organism: Severe | GGAACAACATTGCCAAAAGGCTTCTACGCGAAGGGAGCAGAGGCGGCAGTCAAGCCTCT | 28819 |
| gb:MN985325 | Organism: Severe | GGAACAACATTGCCAAAAGGCTTCTACGCGAAGGGAGCAGAGGCGGCAGTCAAGCCTCT | 28822 |
| gb:MT020881 | Organism: Severe | GGAACAACATTGCCAAAAGGCTTCTACGCGAAGGGAGCAGAGGCGGCAGTCAAGCCTCT | 28822 |
| gb:MT020880 | Organism: Severe | GGAACAACATTGCCAAAAGGCTTCTACGCGAAGGGAGCAGAGGCGGCAGTCAAGCCTCT | 28822 |
| gb:MT066175 | Organism: Severe | GGAACAACATTGCCAAAAGGCTTCTACGCGAAGGGAGCAGAGGCGGCAGTCAAGCCTCT | 28822 |
| gb:MN997409 | Organism: Severe | GGAACAACATTGCCAAAAGGCTTCTACGCGAAGGGAGCAGAGGCGGCAGTCAAGCCTCT | 28822 |



|             |                 |                                                              |       |
|-------------|-----------------|--------------------------------------------------------------|-------|
| gb:MN996527 | Organism:Severe | TCTCGTTCCTCATCACGTAGTCGCAACAGTTCAAGAAATTCACCTCCAGGCAGCAGTAGG | 28849 |
| gb:MT093631 | Organism:Severe | TCTCGTTCCTCATCACGTAGTCGCAACAGTTCAAGAAATTCACCTCCAGGCAGCAGTAGG | 28920 |
| gb:MT106053 | Organism:Severe | TCTCGTTCCTCATCACGTAGTCGCAACAGTTCAAGAAATTCACCTCCAGGCAGCAGTAGG | 28882 |
| gb:MT019533 | Organism:Severe | TCTCGTTCCTCATCACGTAGTCGCAACAGTTCAAGAAATTCACCTCCAGGCAGCAGTAGG | 28882 |
| gb:MT019531 | Organism:Severe | TCTCGTTCCTCATCACGTAGTCGCAACAGTTCAAGAAATTCACCTCCAGGCAGCAGTAGG | 28882 |
| gb:MN996528 | Organism:Severe | TCTCGTTCCTCATCACGTAGTCGCAACAGTTCAAGAAATTCACCTCCAGGCAGCAGTAGG | 28882 |
| gb:MN996530 | Organism:Severe | TCTCGTTCCTCATCACGTAGTCGCAACAGTTCAAGAAATTCACCTCCAGGCAGCAGTAGG | 28868 |
| gb:MN908947 | Organism:Severe | TCTCGTTCCTCATCACGTAGTCGCAACAGTTCAAGAAATTCACCTCCAGGCAGCAGTAGG | 28882 |
| gb:MT019532 | Organism:Severe | TCTCGTTCCTCATCACGTAGTCGCAACAGTTCAAGAAATTCACCTCCAGGCAGCAGTAGG | 28882 |

\*\*\*\*\*

|             |                 |                                                               |       |
|-------------|-----------------|---------------------------------------------------------------|-------|
| gb:MT020781 | Organism:Severe | GGAACTTCTCCTGCTAGAAATGGCTGGCAATGGCGGTGATGCTGCTCTTGCTTTGCTGCTG | 28930 |
| gb:MT007544 | Organism:Severe | GGAACTTCTCCTGCTAGAAATGGCTGGCAATGGCGGTGATGCTGCTCTTGCTTTGCTGCTG | 28942 |
| gb:MN994467 | Organism:Severe | GGAACTTCTCCTGCTAGAAATGGCTGGCAATGGCGGTGATGCTGCTCTTGCTTTGCTGCTG | 28942 |
| gb:MT044257 | Organism:Severe | GGAACTTCTCCTGCTAGAAATGGCTGGCAATGGCGGTGATGCTGCTCTTGCTTTGCTGCTG | 28942 |
| gb:MT106054 | Organism:Severe | GGAACTTCTCCTGCTAGAAATGGCTGGCAATGGCGGTGATGCTGCTCTTGCTTTGCTGCTG | 28942 |
| gb:MT049951 | Organism:Severe | GGAACTTCTCCTGCTAGAAATGGCTGGCAATGGCGGTGATGCTGCTCTTGCTTTGCTGCTG | 28942 |
| gb:MN975262 | Organism:Severe | GGAACTTCTCCTGCTAGAAATGGCTGGCAATGGCGGTGATGCTGCTCTTGCTTTGCTGCTG | 28942 |
| gb:MT106052 | Organism:Severe | GGAACTTCTCCTGCTAGAAATGGCTGGCAATGGCGGTGATGCTGCTCTTGCTTTGCTGCTG | 28942 |
| gb:LC522975 | Organism:Severe | GGAACTTCTCCTGCTAGAAATGGCTGGCAATGGCGGTGATGCTGCTCTTGCTTTGCTGCTG | 28939 |
| gb:LC522973 | Organism:Severe | GGAACTTCTCCTGCTAGAAATGGCTGGCAATGGCGGTGATGCTGCTCTTGCTTTGCTGCTG | 28939 |
| gb:LC522974 | Organism:Severe | GGAACTTCTCCTGCTAGAAATGGCTGGCAATGGCGGTGATGCTGCTCTTGCTTTGCTGCTG | 28939 |
| gb:MN985325 | Organism:Severe | GGAACTTCTCCTGCTAGAAATGGCTGGCAATGGCGGTGATGCTGCTCTTGCTTTGCTGCTG | 28942 |
| gb:MT020881 | Organism:Severe | GGAACTTCTCCTGCTAGAAATGGCTGGCAATGGCGGTGATGCTGCTCTTGCTTTGCTGCTG | 28942 |
| gb:MT020880 | Organism:Severe | GGAACTTCTCCTGCTAGAAATGGCTGGCAATGGCGGTGATGCTGCTCTTGCTTTGCTGCTG | 28942 |
| gb:MT066175 | Organism:Severe | GGAACTTCTCCTGCTAGAAATGGCTGGCAATGGCGGTGATGCTGCTCTTGCTTTGCTGCTG | 28942 |
| gb:MN997409 | Organism:Severe | GGAACTTCTCCTGCTAGAAATGGCTGGCAATGGCGGTGATGCTGCTCTTGCTTTGCTGCTG | 28942 |
| gb:MN938384 | Organism:Severe | GGAACTTCTCCTGCTAGAAATGGCTGGCAATGGCGGTGATGCTGCTCTTGCTTTGCTGCTG | 28910 |
| gb:MT044258 | Organism:Severe | GGAACTTCTCCTGCTAGAAATGGCTGGCAATGGCGGTGATGCTGCTCTTGCTTTGCTGCTG | 28918 |
| gb:MT039890 | Organism:Severe | GGAACTTCTCCTGCTAGAAATGGCTGGCAATGGCGGTGATGCTGCTCTTGCTTTGCTGCTG | 28942 |
| gb:MN988713 | Organism:Severe | GGAACTTCTCCTGCTAGAAATGGCTGGCAATGGCGGTGATGCTGCTCTTGCTTTGCTGCTG | 28942 |
| gb:LC521925 | Organism:Severe | GGAACTTCTCCTGCTAGAAATGGCTGGCAATGGCGGTGATGCTGCTCTTGCTTTGCTGCTG | 28915 |
| gb:MT093571 | Organism:Severe | GGAACTTCTCCTGCTAGAAATGGCTGGCAATGGCGGTGATGCTGCTCTTGCTTTGCTGCTG | 28942 |
| gb:MT039887 | Organism:Severe | GGAACTTCTCCTGCTAGAAATGGCTGGCAATGGCGGTGATGCTGCTCTTGCTTTGCTGCTG | 28939 |
| gb:MT019530 | Organism:Severe | GGAACTTCTCCTGCTAGAAATGGCTGGCAATGGCGGTGATGCTGCTCTTGCTTTGCTGCTG | 28942 |
| gb:MT039888 | Organism:Severe | GGAACTTCTCCTGCTAGAAATGGCTGGCAATGGCGGTGATGCTGCTCTTGCTTTGCTGCTG | 28942 |
| gb:LC522972 | Organism:Severe | GGAACTTCTCCTGCTAGAAATGGCTGGCAATGGCGGTGATGCTGCTCTTGCTTTGCTGCTG | 28939 |
| gb:MT027063 | Organism:Severe | GGAACTTCTCCTGCTAGAAATGGCTGGCAATGGCGGTGATGCTGCTCTTGCTTTGCTGCTG | 28942 |
| gb:MT027062 | Organism:Severe | GGAACTTCTCCTGCTAGAAATGGCTGGCAATGGCGGTGATGCTGCTCTTGCTTTGCTGCTG | 28942 |
| gb:MT019529 | Organism:Severe | GGAACTTCTCCTGCTAGAAATGGCTGGCAATGGCGGTGATGCTGCTCTTGCTTTGCTGCTG | 28942 |
| gb:MN996529 | Organism:Severe | GGAACTTCTCCTGCTAGAAATGGCTGGCAATGGCGGTGATGCTGCTCTTGCTTTGCTGCTG | 28930 |
| gb:MN996531 | Organism:Severe | GGAACTTCTCCTGCTAGAAATGGCTGGCAATGGCGGTGATGCTGCTCTTGCTTTGCTGCTG | 28929 |
| gb:MT066176 | Organism:Severe | GGAACTTCTCCTGCTAGAAATGGCTGGCAATGGCGGTGATGCTGCTCTTGCTTTGCTGCTG | 28942 |
| gb:MT027064 | Organism:Severe | GGAACTTCTCCTGCTAGAAATGGCTGGCAATGGCGGTGATGCTGCTCTTGCTTTGCTGCTG | 28942 |
| gb:MN994468 | Organism:Severe | GGAACTTCTCCTGCTAGAAATGGCTGGCAATGGCGGTGATGCTGCTCTTGCTTTGCTGCTG | 28942 |
| gb:MT072688 | Organism:Severe | GGAACTTCTCCTGCTAGAAATGGCTGGCAATGGCGGTGATGCTGCTCTTGCTTTGCTGCTG | 28927 |
| gb:MN996527 | Organism:Severe | GGAACTTCTCCTGCTAGAAATGGCTGGCAATGGCGGTGATGCTGCTCTTGCTTTGCTGCTG | 28909 |
| gb:MT093631 | Organism:Severe | GGAACTTCTCCTGCTAGAAATGGCTGGCAATGGCGGTGATGCTGCTCTTGCTTTGCTGCTG | 28980 |
| gb:MT106053 | Organism:Severe | GGAACTTCTCCTGCTAGAAATGGCTGGCAATGGCGGTGATGCTGCTCTTGCTTTGCTGCTG | 28942 |
| gb:MT019533 | Organism:Severe | GGAACTTCTCCTGCTAGAAATGGCTGGCAATGGCGGTGATGCTGCTCTTGCTTTGCTGCTG | 28942 |
| gb:MT019531 | Organism:Severe | GGAACTTCTCCTGCTAGAAATGGCTGGCAATGGCGGTGATGCTGCTCTTGCTTTGCTGCTG | 28942 |
| gb:MN996528 | Organism:Severe | GGAACTTCTCCTGCTAGAAATGGCTGGCAATGGCGGTGATGCTGCTCTTGCTTTGCTGCTG | 28942 |
| gb:MN996530 | Organism:Severe | GGAACTTCTCCTGCTAGAAATGGCTGGCAATGGCGGTGATGCTGCTCTTGCTTTGCTGCTG | 28928 |
| gb:MN908947 | Organism:Severe | GGAACTTCTCCTGCTAGAAATGGCTGGCAATGGCGGTGATGCTGCTCTTGCTTTGCTGCTG | 28942 |
| gb:MT019532 | Organism:Severe | GGAACTTCTCCTGCTAGAAATGGCTGGCAATGGCGGTGATGCTGCTCTTGCTTTGCTGCTG | 28942 |

\*\*\*\*\*

|             |                 |                                                           |       |
|-------------|-----------------|-----------------------------------------------------------|-------|
| gb:MT020781 | Organism:Severe | CTTGACAGATTGAACAGCTTGAGAGCAAAATGTCTGGTAAAGGCCAACAAACAAGGC | 28990 |
| gb:MT007544 | Organism:Severe | CTTGACAGATTGAACAGCTTGAGAGCAAAATGTCTGGTAAAGGCCAACAAACAAGGC | 29002 |
| gb:MN994467 | Organism:Severe | CTTGACAGATTGAACAGCTTGAGAGCAAAATGTCTGGTAAAGGCCAACAAACAAGGC | 29002 |
| gb:MT044257 | Organism:Severe | CTTGACAGATTGAACAGCTTGAGAGCAAAATGTCTGGTAAAGGCCAACAAACAAGGC | 29002 |
| gb:MT106054 | Organism:Severe | CTTGACAGATTGAACAGCTTGAGAGCAAAATGTCTGGTAAAGGCCAACAAACAAGGC | 29002 |
| gb:MT049951 | Organism:Severe | CTTGACAGATTGAACAGCTTGAGAGCAAAATGTCTGGTAAAGGCCAACAAACAAGGC | 29002 |
| gb:MN975262 | Organism:Severe | CTTGACAGATTGAACAGCTTGAGAGCAAAATGTCTGGTAAAGGCCAACAAACAAGGC | 29002 |
| gb:MT106052 | Organism:Severe | CTTGACAGATTGAACAGCTTGAGAGCAAAATGTCTGGTAAAGGCCAACAAACAAGGC | 29002 |

|             |                 |                                                            |       |
|-------------|-----------------|------------------------------------------------------------|-------|
| gb:LC522975 | Organism:Severe | CTTGACAGATTGAACCAAGCTTGAGAGCAAATGTCTGGTAAAGGCCAACAAACAAGGC | 28999 |
| gb:LC522973 | Organism:Severe | CTTGACAGATTGAACCAAGCTTGAGAGCAAATGTCTGGTAAAGGCCAACAAACAAGGC | 28999 |
| gb:LC522974 | Organism:Severe | CTTGACAGATTGAACCAAGCTTGAGAGCAAATGTCTGGTAAAGGCCAACAAACAAGGC | 28999 |
| gb:MN985325 | Organism:Severe | CTTGACAGATTGAACCAAGCTTGAGAGCAAATGTCTGGTAAAGGCCAACAAACAAGGC | 29002 |
| gb:MT020881 | Organism:Severe | CTTGACAGATTGAACCAAGCTTGAGAGCAAATGTCTGGTAAAGGCCAACAAACAAGGC | 29002 |
| gb:MT020880 | Organism:Severe | CTTGACAGATTGAACCAAGCTTGAGAGCAAATGTCTGGTAAAGGCCAACAAACAAGGC | 29002 |
| gb:MT066175 | Organism:Severe | CTTGACAGATTGAACCAAGCTTGAGAGCAAATGTCTGGTAAAGGCCAACAAACAAGGC | 29002 |
| gb:MN997409 | Organism:Severe | CTTGACAGATTGAACCAAGCTTGAGAGCAAATGTCTGGTAAAGGCCAACAAACAAGGC | 29002 |
| gb:MN938384 | Organism:Severe | CTTGACAGATTGAACCAAGCTTGAGAGCAAATGTCTGGTAAAGGCCAACAAACAAGGC | 28970 |
| gb:MT044258 | Organism:Severe | CTTGACAGATTGAACCAAGCTTGAGAGCAAATGTCTGGTAAAGGCCAACAAACAAGGC | 28978 |
| gb:MT039890 | Organism:Severe | CTTGACAGATTGAACCAAGCTTGAGAGCAAATGTCTGGTAAAGGCCAACAAACAAGGC | 29002 |
| gb:MN988713 | Organism:Severe | CTTGACAGATTGAACCAAGCTTGAGAGCAAATGTCTGGTAAAGGCCAACAAACAAGGC | 29002 |
| gb:LC521925 | Organism:Severe | CTTGACAGATTGAACCAAGCTTGAGAGCAAATGTCTGGTAAAGGCCAACAAACAAGGC | 28975 |
| gb:MT093571 | Organism:Severe | CTTGACAGATTGAACCAAGCTTGAGAGCAAATGTCTGGTAAAGGCCAACAAACAAGGC | 29002 |
| gb:MT039887 | Organism:Severe | CTTGACAGATTGAACCAAGCTTGAGAGCAAATGTCTGGTAAAGGCCAACAAACAAGGC | 28999 |
| gb:MT019530 | Organism:Severe | CTTGACAGATTGAACCAAGCTTGAGAGCAAATGTCTGGTAAAGGCCAACAAACAAGGC | 29002 |
| gb:MT039888 | Organism:Severe | CTTGACAGATTGAACCAAGCTTGAGAGCAAATGTCTGGTAAAGGCCAACAAACAAGGC | 29002 |
| gb:LC522972 | Organism:Severe | CTTGACAGATTGAACCAAGCTTGAGAGCAAATGTCTGGTAAAGGCCAACAAACAAGGC | 28999 |
| gb:MT027063 | Organism:Severe | CTTGACAGATTGAACCAAGCTTGAGAGCAAATGTCTGGTAAAGGCCAACAAACAAGGC | 29002 |
| gb:MT027062 | Organism:Severe | CTTGACAGATTGAACCAAGCTTGAGAGCAAATGTCTGGTAAAGGCCAACAAACAAGGC | 29002 |
| gb:MT019529 | Organism:Severe | CTTGACAGATTGAACCAAGCTTGAGAGCAAATGTCTGGTAAAGGCCAACAAACAAGGC | 29002 |
| gb:MN996529 | Organism:Severe | CTTGACAGATTGAACCAAGCTTGAGAGCAAATGTCTGGTAAAGGCCAACAAACAAGGC | 28990 |
| gb:MN996531 | Organism:Severe | CTTGACAGATTGAACCAAGCTTGAGAGCAAATGTCTGGTAAAGGCCAACAAACAAGGC | 28989 |
| gb:MT066176 | Organism:Severe | CTTGACAGATTGAACCAAGCTTGAGAGCAAATGTCTGGTAAAGGCCAACAAACAAGGC | 29002 |
| gb:MT027064 | Organism:Severe | CTTGACAGATTGAACCAAGCTTGAGAGCAAATGTCTGGTAAAGGCCAACAAACAAGGC | 29002 |
| gb:MN994468 | Organism:Severe | CTTGACAGATTGAACCAAGCTTGAGAGCAAATGTCTGGTAAAGGCCAACAAACAAGGC | 29002 |
| gb:MT072688 | Organism:Severe | CTTGACAGATTGAACCAAGCTTGAGAGCAAATGTCTGGTAAAGGCCAACAAACAAGGC | 28987 |
| gb:MN996527 | Organism:Severe | CTTGACAGATTGAACCAAGCTTGAGAGCAAATGTCTGGTAAAGGCCAACAAACAAGGC | 28969 |
| gb:MT093631 | Organism:Severe | CTTGACAGATTGAACCAAGCTTGAGAGCAAATGTCTGGTAAAGGCCAACAAACAAGGC | 29040 |
| gb:MT106053 | Organism:Severe | CTTGACAGATTGAACCAAGCTTGAGAGCAAATGTCTGGTAAAGGCCAACAAACAAGGC | 29002 |
| gb:MT019533 | Organism:Severe | CTTGACAGATTGAACCAAGCTTGAGAGCAAATGTCTGGTAAAGGCCAACAAACAAGGC | 29002 |
| gb:MT019531 | Organism:Severe | CTTGACAGATTGAACCAAGCTTGAGAGCAAATGTCTGGTAAAGGCCAACAAACAAGGC | 29002 |
| gb:MN996528 | Organism:Severe | CTTGACAGATTGAACCAAGCTTGAGAGCAAATGTCTGGTAAAGGCCAACAAACAAGGC | 29002 |
| gb:MN996530 | Organism:Severe | CTTGACAGATTGAACCAAGCTTGAGAGCAAATGTCTGGTAAAGGCCAACAAACAAGGC | 28988 |
| gb:MN908947 | Organism:Severe | CTTGACAGATTGAACCAAGCTTGAGAGCAAATGTCTGGTAAAGGCCAACAAACAAGGC | 29002 |
| gb:MT019532 | Organism:Severe | CTTGACAGATTGAACCAAGCTTGAGAGCAAATGTCTGGTAAAGGCCAACAAACAAGGC | 29002 |

\*\*\*\*\*

|             |                 |                                                             |       |
|-------------|-----------------|-------------------------------------------------------------|-------|
| gb:MT020781 | Organism:Severe | CAAACGTCACTAAGAAATCTGCTGCTGAGGCTTCTAAGAAGCCTCGGCAAAAACGTACT | 29050 |
| gb:MT007544 | Organism:Severe | CAAACGTCACTAAGAAATCTGCTGCTGAGGCTTCTAAGAAGCCTCGGCAAAAACGTACT | 29062 |
| gb:MN994467 | Organism:Severe | CAAACGTCACTAAGAAATCTGCTGCTGAGGCTTCTAAGAAGCCTCGGCAAAAACGTACT | 29062 |
| gb:MT044257 | Organism:Severe | CAAACGTCACTAAGAAATCTGCTGCTGAGGCTTCTAAGAAGCCTCGGCAAAAACGTACT | 29062 |
| gb:MT106054 | Organism:Severe | CAAACGTCACTAAGAAATCTGCTGCTGAGGCTTCTAAGAAGCCTCGGCAAAAACGTACT | 29062 |
| gb:MT049951 | Organism:Severe | CAAACGTCACTAAGAAATCTGCTGCTGAGGCTTCTAAGAAGCCTCGGCAAAAACGTACT | 29062 |
| gb:MN975262 | Organism:Severe | CAAACGTCACTAAGAAATCTGCTGCTGAGGCTTCTAAGAAGCCTCGGCAAAAACGTACT | 29062 |
| gb:MT106052 | Organism:Severe | CAAACGTCACTAAGAAATCTGCTGCTGAGGCTTCTAAGAAGCCTCGGCAAAAACGTACT | 29062 |
| gb:LC522975 | Organism:Severe | CAAACGTCACTAAGAAATCTGCTGCTGAGGCTTCTAAGAAGCCTCGGCAAAAACGTACT | 29059 |
| gb:LC522973 | Organism:Severe | CAAACGTCACTAAGAAATCTGCTGCTGAGGCTTCTAAGAAGCCTCGGCAAAAACGTACT | 29059 |
| gb:LC522974 | Organism:Severe | CAAACGTCACTAAGAAATCTGCTGCTGAGGCTTCTAAGAAGCCTCGGCAAAAACGTACT | 29059 |
| gb:MN985325 | Organism:Severe | CAAACGTCACTAAGAAATCTGCTGCTGAGGCTTCTAAGAAGCCTCGGCAAAAACGTACT | 29062 |
| gb:MT020881 | Organism:Severe | CAAACGTCACTAAGAAATCTGCTGCTGAGGCTTCTAAGAAGCCTCGGCAAAAACGTACT | 29062 |
| gb:MT020880 | Organism:Severe | CAAACGTCACTAAGAAATCTGCTGCTGAGGCTTCTAAGAAGCCTCGGCAAAAACGTACT | 29062 |
| gb:MT066175 | Organism:Severe | CAAACGTCACTAAGAAATCTGCTGCTGAGGCTTCTAAGAAGCCTCGGCAAAAACGTACT | 29062 |
| gb:MN997409 | Organism:Severe | CAAACGTCACTAAGAAATCTGCTGCTGAGGCTTCTAAGAAGCCTCGGCAAAAACGTACT | 29062 |
| gb:MN938384 | Organism:Severe | CAAACGTCACTAAGAAATCTGCTGCTGAGGCTTCTAAGAAGCCTCGGCAAAAACGTACT | 29030 |
| gb:MT044258 | Organism:Severe | CAAACGTCACTAAGAAATCTGCTGCTGAGGCTTCTAAGAAGCCTCGGCAAAAACGTACT | 29038 |
| gb:MT039890 | Organism:Severe | CAAACGTCACTAAGAAATCTGCTGCTGAGGCTTCTAAGAAGCCTCGGCAAAAACGTACT | 29062 |
| gb:MN988713 | Organism:Severe | CAAACGTCACTAAGAAATCTGCTGCTGAGGCTTCTAAGAAGCCTCGGCAAAAACGTACT | 29062 |
| gb:LC521925 | Organism:Severe | CAAACGTCACTAAGAAATCTGCTGCTGAGGCTTCTAAGAAGCCTCGGCAAAAACGTACT | 29035 |
| gb:MT093571 | Organism:Severe | CAAACGTCACTAAGAAATCTGCTGCTGAGGCTTCTAAGAAGCCTCGGCAAAAACGTACT | 29062 |
| gb:MT039887 | Organism:Severe | CAAACGTCACTAAGAAATCTGCTGCTGAGGCTTCTAAGAAGCCTCGGCAAAAACGTACT | 29059 |
| gb:MT019530 | Organism:Severe | CAAACGTCACTAAGAAATCTGCTGCTGAGGCTTCTAAGAAGCCTCGGCAAAAACGTACT | 29062 |
| gb:MT039888 | Organism:Severe | CAAACGTCACTAAGAAATCTGCTGCTGAGGCTTCTAAGAAGCCTCGGCAAAAACGTACT | 29062 |
| gb:LC522972 | Organism:Severe | CAAACGTCACTAAGAAATCTGCTGCTGAGGCTTCTAAGAAGCCTCGGCAAAAACGTACT | 29059 |
| gb:MT027063 | Organism:Severe | CAAACGTCACTAAGAAATCTGCTGCTGAGGCTTCTAAGAAGCCTCGGCAAAAACGTACT | 29062 |



|             |                  |                                                                 |       |
|-------------|------------------|-----------------------------------------------------------------|-------|
| gb:MT027062 | Organism: Severe | CAAAC TGTCTACTAAGAAATCTGCTGCTGAGGCTTCTAAGAAGCCTCGGCAAAAAACGTACT | 29062 |
| gb:MT019529 | Organism: Severe | CAAAC TGTCTACTAAGAAATCTGCTGCTGAGGCTTCTAAGAAGCCTCGGCAAAAAACGTACT | 29062 |
| gb:MN996529 | Organism: Severe | CAAAC TGTCTACTAAGAAATCTGCTGCTGAGGCTTCTAAGAAGCCTCGGCAAAAAACGTACT | 29050 |
| gb:MN996531 | Organism: Severe | CAAAC TGTCTACTAAGAAATCTGCTGCTGAGGCTTCTAAGAAGCCTCGGCAAAAAACGTACT | 29049 |
| gb:MT066176 | Organism: Severe | CAAAC TGTCTACTAAGAAATCTGCTGCTGAGGCTTCTAAGAAGCCTCGGCAAAAAACGTACT | 29062 |
| gb:MT027064 | Organism: Severe | CAAAC TGTCTACTAAGAAATCTGCTGCTGAGGCTTCTAAGAAGCCTCGGCAAAAAACGTACT | 29062 |
| gb:MN994468 | Organism: Severe | CAAAC TGTCTACTAAGAAATCTGCTGCTGAGGCTTCTAAGAAGCCTCGGCAAAAAACGTACT | 29062 |
| gb:MT072688 | Organism: Severe | CAAAC TGTCTACTAAGAAATCTGCTGCTGAGGCTTCTAAGAAGCCTCGGCAAAAAACGTACT | 29047 |
| gb:MN996527 | Organism: Severe | CAAAC TGTCTACTAAGAAATCTGCTGCTGAGGCTTCTAAGAAGCCTCGGCAAAAAACGTACT | 29029 |
| gb:MT093631 | Organism: Severe | CAAAC TGTCTACTAAGAAATCTGCTGCTGAGGCTTCTAAGAAGCCTCGGCAAAAAACGTACT | 29100 |
| gb:MT106053 | Organism: Severe | CAAAC TGTCTACTAAGAAATCTGCTGCTGAGGCTTCTAAGAAGCCTCGGCAAAAAACGTACT | 29062 |
| gb:MT019533 | Organism: Severe | CAAAC TGTCTACTAAGAAATCTGCTGCTGAGGCTTCTAAGAAGCCTCGGCAAAAAACGTACT | 29062 |
| gb:MT019531 | Organism: Severe | CAAAC TGTCTACTAAGAAATCTGCTGCTGAGGCTTCTAAGAAGCCTCGGCAAAAAACGTACT | 29062 |
| gb:MN996528 | Organism: Severe | CAAAC TGTCTACTAAGAAATCTGCTGCTGAGGCTTCTAAGAAGCCTCGGCAAAAAACGTACT | 29062 |
| gb:MN996530 | Organism: Severe | CAAAC TGTCTACTAAGAAATCTGCTGCTGAGGCTTCTAAGAAGCCTCGGCAAAAAACGTACT | 29048 |
| gb:MN908947 | Organism: Severe | CAAAC TGTCTACTAAGAAATCTGCTGCTGAGGCTTCTAAGAAGCCTCGGCAAAAAACGTACT | 29062 |
| gb:MT019532 | Organism: Severe | CAAAC TGTCTACTAAGAAATCTGCTGCTGAGGCTTCTAAGAAGCCTCGGCAAAAAACGTACT | 29062 |

\*\*\*\*\*

|             |                  |                                                              |       |
|-------------|------------------|--------------------------------------------------------------|-------|
| gb:MT020781 | Organism: Severe | GCCACTAAAGCATAACAATGTAACACAAGCTTTGCGCAGACGTGGTCCAGAACAACCCAA | 29110 |
| gb:MT007544 | Organism: Severe | GCCACTAAAGCATAACAATGTAACACAAGCTTTGCGCAGACGTGGTCCAGAACAACCCAA | 29122 |
| gb:MN994467 | Organism: Severe | GCCACTAAAGCATAACAATGTAACACAAGCTTTGCGCAGACGTGGTCCAGAACAACCCAA | 29122 |
| gb:MT044257 | Organism: Severe | GCCACTAAAGCATAACAATGTAACACAAGCTTTGCGCAGACGTGGTCCAGAACAACCCAA | 29122 |
| gb:MT106054 | Organism: Severe | GCCACTAAAGCATAACAATGTAACACAAGCTTTGCGCAGACGTGGTCCAGAACAACCCAA | 29122 |
| gb:MT049951 | Organism: Severe | GCCACTAAAGCATAACAATGTAACACAAGCTTTGCGCAGACGTGGTCCAGAACAACCCAA | 29122 |
| gb:MN975262 | Organism: Severe | GCCACTAAAGCATAACAATGTAACACAAGCTTTGCGCAGACGTGGTCCAGAACAACCCAA | 29122 |
| gb:MT106052 | Organism: Severe | GCCACTAAAGCATAACAATGTAACACAAGCTTTGCGCAGACGTGGTCCAGAACAACCCAA | 29122 |
| gb:LC522975 | Organism: Severe | GCCACTAAAGCATAACAATGTAACACAAGCTTTGCGCAGACGTGGTCCAGAACAACCCAA | 29119 |
| gb:LC522973 | Organism: Severe | GCCACTAAAGCATAACAATGTAACACAAGCTTTGCGCAGACGTGGTCCAGAACAACCCAA | 29119 |
| gb:LC522974 | Organism: Severe | GCCACTAAAGCATAACAATGTAACACAAGCTTTGCGCAGACGTGGTCCAGAACAACCCAA | 29119 |
| gb:MN985325 | Organism: Severe | GCCACTAAAGCATAACAATGTAACACAAGCTTTGCGCAGACGTGGTCCAGAACAACCCAA | 29122 |
| gb:MT020881 | Organism: Severe | GCCACTAAAGCATAACAATGTAACACAAGCTTTGCGCAGACGTGGTCCAGAACAACCCAA | 29122 |
| gb:MT020880 | Organism: Severe | GCCACTAAAGCATAACAATGTAACACAAGCTTTGCGCAGACGTGGTCCAGAACAACCCAA | 29122 |
| gb:MT066175 | Organism: Severe | GCCACTAAAGCATAACAATGTAACACAAGCTTTGCGCAGACGTGGTCCAGAACAACCCAA | 29122 |
| gb:MN997409 | Organism: Severe | GCCACTAAAGCATAACAATGTAACACAAGCTTTGCGCAGACGTGGTCCAGAACAACCCAA | 29122 |
| gb:MN938384 | Organism: Severe | GCCACTAAAGCATAACAATGTAACACAAGCTTTGCGCAGACGTGGTCCAGAACAACCCAA | 29090 |
| gb:MT044258 | Organism: Severe | GCCACTAAAGCATAACAATGTAACACAAGCTTTGCGCAGACGTGGTCCAGAACAACCCAA | 29098 |
| gb:MT039890 | Organism: Severe | GCCACTAAAGCATAACAATGTAACACAAGCTTTGCGCAGACGTGGTCCAGAACAACCCAA | 29122 |
| gb:MN988713 | Organism: Severe | GCCACTAAAGCATAACAATGTAACACAAGCTTTGCGCAGACGTGGTCCAGAACAACCCAA | 29122 |
| gb:LC521925 | Organism: Severe | GCCACTAAAGCATAACAATGTAACACAAGCTTTGCGCAGACGTGGTCCAGAACAACCCAA | 29095 |
| gb:MT093571 | Organism: Severe | GCCACTAAAGCATAACAATGTAACACAAGCTTTGCGCAGACGTGGTCCAGAACAACCCAA | 29122 |
| gb:MT039887 | Organism: Severe | GCCACTAAAGCATAACAATGTAACACAAGCTTTGCGCAGACGTGGTCCAGAACAACCCAA | 29119 |
| gb:MT019530 | Organism: Severe | GCCACTAAAGCATAACAATGTAACACAAGCTTTGCGCAGACGTGGTCCAGAACAACCCAA | 29122 |
| gb:MT039888 | Organism: Severe | GCCACTAAAGCATAACAATGTAACACAAGCTTTGCGCAGACGTGGTCCAGAACAACCCAA | 29122 |
| gb:LC522972 | Organism: Severe | GCCACTAAAGCATAACAATGTAACACAAGCTTTGCGCAGACGTGGTCCAGAACAACCCAA | 29119 |
| gb:MT027063 | Organism: Severe | GCCACTAAAGCATAACAATGTAACACAAGCTTTGCGCAGACGTGGTCCAGAACAACCCAA | 29122 |
| gb:MT027062 | Organism: Severe | GCCACTAAAGCATAACAATGTAACACAAGCTTTGCGCAGACGTGGTCCAGAACAACCCAA | 29122 |
| gb:MT019529 | Organism: Severe | GCCACTAAAGCATAACAATGTAACACAAGCTTTGCGCAGACGTGGTCCAGAACAACCCAA | 29122 |
| gb:MN996529 | Organism: Severe | GCCACTAAAGCATAACAATGTAACACAAGCTTTGCGCAGACGTGGTCCAGAACAACCCAA | 29110 |
| gb:MN996531 | Organism: Severe | GCCACTAAAGCATAACAATGTAACACAAGCTTTGCGCAGACGTGGTCCAGAACAACCCAA | 29109 |
| gb:MT066176 | Organism: Severe | GCCACTAAAGCATAACAATGTAACACAAGCTTTGCGCAGACGTGGTCCAGAACAACCCAA | 29122 |
| gb:MT027064 | Organism: Severe | GCCACTAAAGCATAACAATGTAACACAAGCTTTGCGCAGACGTGGTCCAGAACAACCCAA | 29122 |
| gb:MN994468 | Organism: Severe | GCCACTAAAGCATAACAATGTAACACAAGCTTTGCGCAGACGTGGTCCAGAACAACCCAA | 29122 |
| gb:MT072688 | Organism: Severe | GCCACTAAAGCATAACAATGTAACACAAGCTTTGCGCAGACGTGGTCCAGAACAACCCAA | 29107 |
| gb:MN996527 | Organism: Severe | GCCACTAAAGCATAACAATGTAACACAAGCTTTGCGCAGACGTGGTCCAGAACAACCCAA | 29089 |
| gb:MT093631 | Organism: Severe | GCCACTAAAGCATAACAATGTAACACAAGCTTTGCGCAGACGTGGTCCAGAACAACCCAA | 29160 |
| gb:MT106053 | Organism: Severe | GCCACTAAAGCATAACAATGTAACACAAGCTTTGCGCAGACGTGGTCCAGAACAACCCAA | 29122 |
| gb:MT019533 | Organism: Severe | GCCACTAAAGCATAACAATGTAACACAAGCTTTGCGCAGACGTGGTCCAGAACAACCCAA | 29122 |
| gb:MT019531 | Organism: Severe | GCCACTAAAGCATAACAATGTAACACAAGCTTTGCGCAGACGTGGTCCAGAACAACCCAA | 29122 |
| gb:MN996528 | Organism: Severe | GCCACTAAAGCATAACAATGTAACACAAGCTTTGCGCAGACGTGGTCCAGAACAACCCAA | 29122 |
| gb:MN996530 | Organism: Severe | GCCACTAAAGCATAACAATGTAACACAAGCTTTGCGCAGACGTGGTCCAGAACAACCCAA | 29108 |
| gb:MN908947 | Organism: Severe | GCCACTAAAGCATAACAATGTAACACAAGCTTTGCGCAGACGTGGTCCAGAACAACCCAA | 29122 |
| gb:MT019532 | Organism: Severe | GCCACTAAAGCATAACAATGTAACACAAGCTTTGCGCAGACGTGGTCCAGAACAACCCAA | 29122 |

\*\*\*\*\*



|             |                 |                                                             |       |
|-------------|-----------------|-------------------------------------------------------------|-------|
| gb:MN988713 | Organism:Severe | ATTGCACAATTTGCCCCAGCGCTTCAGCGTTCCTCGGAATGTCGCGCATTGGCATGGAA | 29242 |
| gb:LC521925 | Organism:Severe | ATTGCACAATTTGCCCCAGCGCTTCAGCGTTCCTCGGAATGTCGCGCATTGGCATGGAA | 29215 |
| gb:MT093571 | Organism:Severe | ATTGCACAATTTGCCCCAGCGCTTCAGCGTTCCTCGGAATGTCGCGCATTGGCATGGAA | 29242 |
| gb:MT039887 | Organism:Severe | ATTGCACAATTTGCCCCAGCGCTTCAGCGTTCCTCGGAATGTCGCGCATTGGCATGGAA | 29239 |
| gb:MT019530 | Organism:Severe | ATTGCACAATTTGCCCCAGCGCTTCAGCGTTCCTCGGAATGTCGCGCATTGGCATGGAA | 29242 |
| gb:MT039888 | Organism:Severe | ATTGCACAATTTGCCCCAGCGCTTCAGCGTTCCTCGGAATGTCGCGCATTGGCATGGAA | 29242 |
| gb:LC522972 | Organism:Severe | ATTGCACAATTTGCCCCAGCGCTTCAGCGTTCCTCGGAATGTCGCGCATTGGCATGGAA | 29239 |
| gb:MT027063 | Organism:Severe | ATTGCACAATTTGCCCCAGCGCTTCAGCGTTCCTCGGAATGTCGCGCATTGGCATGGAA | 29242 |
| gb:MT027062 | Organism:Severe | ATTGCACAATTTGCCCCAGCGCTTCAGCGTTCCTCGGAATGTCGCGCATTGGCATGGAA | 29242 |
| gb:MT019529 | Organism:Severe | ATTGCACAATTTGCCCCAGCGCTTCAGCGTTCCTCGGAATGTCGCGCATTGGCATGGAA | 29242 |
| gb:MN996529 | Organism:Severe | ATTGCACAATTTGCCCCAGCGCTTCAGCGTTCCTCGGAATGTCGCGCATTGGCATGGAA | 29230 |
| gb:MN996531 | Organism:Severe | ATTGCACAATTTGCCCCAGCGCTTCAGCGTTCCTCGGAATGTCGCGCATTGGCATGGAA | 29229 |
| gb:MT066176 | Organism:Severe | ATTGCACAATTTGCCCCAGCGCTTCAGCGTTCCTCGGAATGTCGCGCATTGGCATGGAA | 29242 |
| gb:MT027064 | Organism:Severe | ATTGCACAATTTGCCCCAGCGCTTCAGCGTTCCTCGGAATGTCGCGCATTGGCATGGAA | 29242 |
| gb:MN994468 | Organism:Severe | ATTGCACAATTTGCCCCAGCGCTTCAGCGTTCCTCGGAATGTCGCGCATTGGCATGGAA | 29242 |
| gb:MT072688 | Organism:Severe | ATTGCACAATTTGCCCCAGCGCTTCAGCGTTCCTCGGAATGTCGCGCATTGGCATGGAA | 29227 |
| gb:MN996527 | Organism:Severe | ATTGCACAATTTGCCCCAGCGCTTCAGCGTTCCTCGGAATGTCGCGCATTGGCATGGAA | 29209 |
| gb:MT093631 | Organism:Severe | ATTGCACAATTTGCCCCAGCGCTTCAGCGTTCCTCGGAATGTCGCGCATTGGCATGGAA | 29280 |
| gb:MT106053 | Organism:Severe | ATTGCACAATTTGCCCCAGCGCTTCAGCGTTCCTCGGAATGTCGCGCATTGGCATGGAA | 29242 |
| gb:MT019533 | Organism:Severe | ATTGCACAATTTGCCCCAGCGCTTCAGCGTTCCTCGGAATGTCGCGCATTGGCATGGAA | 29242 |
| gb:MT019531 | Organism:Severe | ATTGCACAATTTGCCCCAGCGCTTCAGCGTTCCTCGGAATGTCGCGCATTGGCATGGAA | 29242 |
| gb:MN996528 | Organism:Severe | ATTGCACAATTTGCCCCAGCGCTTCAGCGTTCCTCGGAATGTCGCGCATTGGCATGGAA | 29242 |
| gb:MN996530 | Organism:Severe | ATTGCACAATTTGCCCCAGCGCTTCAGCGTTCCTCGGAATGTCGCGCATTGGCATGGAA | 29228 |
| gb:MN908947 | Organism:Severe | ATTGCACAATTTGCCCCAGCGCTTCAGCGTTCCTCGGAATGTCGCGCATTGGCATGGAA | 29242 |
| gb:MT019532 | Organism:Severe | ATTGCACAATTTGCCCCAGCGCTTCAGCGTTCCTCGGAATGTCGCGCATTGGCATGGAA | 29242 |

\*\*\*\*\*

|             |                 |                                                               |       |
|-------------|-----------------|---------------------------------------------------------------|-------|
| gb:MT020781 | Organism:Severe | GTCACACCTTCGGGAACGTGGTTGACCTACACAGGTGCCATCAAATTTGGATGACAAAGAT | 29290 |
| gb:MT007544 | Organism:Severe | GTCACACCTTCGGGAACGTGGTTGACCTACACAGGTGCCATCAAATTTGGATGACAAAGAT | 29302 |
| gb:MN994467 | Organism:Severe | GTCACACCTTCGGGAACGTGGTTGACCTACACAGGTGCCATCAAATTTGGATGACAAAGAT | 29302 |
| gb:MT044257 | Organism:Severe | GTCACACCTTCGGGAACGTGGTTGACCTACACAGGTGCCATCAAATTTGGATGACAAAGAT | 29302 |
| gb:MT106054 | Organism:Severe | GTCACACCTTCGGGAACGTGGTTGACCTACACAGGTGCCATCAAATTTGGATGACAAAGAT | 29302 |
| gb:MT049951 | Organism:Severe | GTCACACCTTCGGGAACGTGGTTGACCTACACAGGTGCCATCAAATTTGGATGACAAAGAT | 29302 |
| gb:MN975262 | Organism:Severe | GTCACACCTTCGGGAACGTGGTTGACCTACACAGGTGCCATCAAATTTGGATGACAAAGAT | 29302 |
| gb:MT106052 | Organism:Severe | GTCACACCTTCGGGAACGTGGTTGACCTACACAGGTGCCATCAAATTTGGATGACAAAGAT | 29302 |
| gb:LC522975 | Organism:Severe | GTCACACCTTCGGGAACGTGGTTGACCTACACAGGTGCCATCAAATTTGGATGACAAAGAT | 29299 |
| gb:LC522973 | Organism:Severe | GTCACACCTTCGGGAACGTGGTTGACCTACACAGGTGCCATCAAATTTGGATGACAAAGAT | 29299 |
| gb:LC522974 | Organism:Severe | GTCACACCTTCGGGAACGTGGTTGACCTACACAGGTGCCATCAAATTTGGATGACAAAGAT | 29299 |
| gb:MN985325 | Organism:Severe | GTCACACCTTCGGGAACGTGGTTGACCTACACAGGTGCCATCAAATTTGGATGACAAAGAT | 29302 |
| gb:MT020881 | Organism:Severe | GTCACACCTTCGGGAACGTGGTTGACCTACACAGGTGCCATCAAATTTGGATGACAAAGAT | 29302 |
| gb:MT020880 | Organism:Severe | GTCACACCTTCGGGAACGTGGTTGACCTACACAGGTGCCATCAAATTTGGATGACAAAGAT | 29302 |
| gb:MT066175 | Organism:Severe | GTCACACCTTCGGGAACGTGGTTGACCTACACAGGTGCCATCAAATTTGGATGACAAAGAT | 29302 |
| gb:MN997409 | Organism:Severe | GTCACACCTTCGGGAACGTGGTTGACCTACACAGGTGCCATCAAATTTGGATGACAAAGAT | 29302 |
| gb:MN938384 | Organism:Severe | GTCACACCTTCGGGAACGTGGTTGACCTACACAGGTGCCATCAAATTTGGATGACAAAGAT | 29270 |
| gb:MT044258 | Organism:Severe | GTCACACCTTCGGGAACGTGGTTGACCTACACAGGTGCCATCAAATTTGGATGACAAAGAT | 29278 |
| gb:MT039890 | Organism:Severe | GTCACACCTTCGGGAACGTGGTTGACCTACACAGGTGCCATCAAATTTGGATGACAAAGAT | 29302 |
| gb:MN988713 | Organism:Severe | GTCACACCTTCGGGAACGTGGTTGACCTACACAGGTGCCATCAAATTTGGATGACAAAGAT | 29302 |
| gb:LC521925 | Organism:Severe | GTCACACCTTCGGGAACGTGGTTGACCTACACAGGTGCCATCAAATTTGGATGACAAAGAT | 29275 |
| gb:MT093571 | Organism:Severe | GTCACACCTTCGGGAACGTGGTTGACCTACACAGGTGCCATCAAATTTGGATGACAAAGAT | 29302 |
| gb:MT039887 | Organism:Severe | GTCACACCTTCGGGAACGTGGTTGACCTACACAGGTGCCATCAAATTTGGATGACAAAGAT | 29299 |
| gb:MT019530 | Organism:Severe | GTCACACCTTCGGGAACGTGGTTGACCTACACAGGTGCCATCAAATTTGGATGACAAAGAT | 29302 |
| gb:MT039888 | Organism:Severe | GTCACACCTTCGGGAACGTGGTTGACCTACACAGGTGCCATCAAATTTGGATGACAAAGAT | 29302 |
| gb:LC522972 | Organism:Severe | GTCACACCTTCGGGAACGTGGTTGACCTACACAGGTGCCATCAAATTTGGATGACAAAGAT | 29299 |
| gb:MT027063 | Organism:Severe | GTCACACCTTCGGGAACGTGGTTGACCTACACAGGTGCCATCAAATTTGGATGACAAAGAT | 29302 |
| gb:MT027062 | Organism:Severe | GTCACACCTTCGGGAACGTGGTTGACCTACACAGGTGCCATCAAATTTGGATGACAAAGAT | 29302 |
| gb:MT019529 | Organism:Severe | GTCACACCTTCGGGAACGTGGTTGACCTACACAGGTGCCATCAAATTTGGATGACAAAGAT | 29302 |
| gb:MN996529 | Organism:Severe | GTCACACCTTCGGGAACGTGGTTGACCTACACAGGTGCCATCAAATTTGGATGACAAAGAT | 29290 |
| gb:MN996531 | Organism:Severe | GTCACACCTTCGGGAACGTGGTTGACCTACACAGGTGCCATCAAATTTGGATGACAAAGAT | 29289 |
| gb:MT066176 | Organism:Severe | GTCACACCTTCGGGAACGTGGTTGACCTACACAGGTGCCATCAAATTTGGATGACAAAGAT | 29302 |
| gb:MT027064 | Organism:Severe | GTCACACCTTCGGGAACGTGGTTGACCTACACAGGTGCCATCAAATTTGGATGACAAAGAT | 29302 |
| gb:MN994468 | Organism:Severe | GTCACACCTTCGGGAACGTGGTTGACCTACACAGGTGCCATCAAATTTGGATGACAAAGAT | 29302 |
| gb:MT072688 | Organism:Severe | GTCACACCTTCGGGAACGTGGTTGACCTACACAGGTGCCATCAAATTTGGATGACAAAGAT | 29287 |
| gb:MN996527 | Organism:Severe | GTCACACCTTCGGGAACGTGGTTGACCTACACAGGTGCCATCAAATTTGGATGACAAAGAT | 29269 |
| gb:MT093631 | Organism:Severe | GTCACACCTTCGGGAACGTGGTTGACCTACACAGGTGCCATCAAATTTGGATGACAAAGAT | 29340 |
| gb:MT106053 | Organism:Severe | GTCACACCTTCGGGAACGTGGTTGACCTACACAGGTGCCATCAAATTTGGATGACAAAGAT | 29302 |

|             |                 |                                                               |       |
|-------------|-----------------|---------------------------------------------------------------|-------|
| gb:MT019533 | Organism:Severe | GTCACACCTTCGGGAACGTGGTTGACCTACACAGGTGCCATCAAATTTGGATGACAAAGAT | 29302 |
| gb:MT019531 | Organism:Severe | GTCACACCTTCGGGAACGTGGTTGACCTACACAGGTGCCATCAAATTTGGATGACAAAGAT | 29302 |
| gb:MN996528 | Organism:Severe | GTCACACCTTCGGGAACGTGGTTGACCTACACAGGTGCCATCAAATTTGGATGACAAAGAT | 29302 |
| gb:MN996530 | Organism:Severe | GTCACACCTTCGGGAACGTGGTTGACCTACACAGGTGCCATCAAATTTGGATGACAAAGAT | 29288 |
| gb:MN908947 | Organism:Severe | GTCACACCTTCGGGAACGTGGTTGACCTACACAGGTGCCATCAAATTTGGATGACAAAGAT | 29302 |
| gb:MT019532 | Organism:Severe | GTCACACCTTCGGGAACGTGGTTGACCTACACAGGTGCCATCAAATTTGGATGACAAAGAT | 29302 |

\*\*\*\*\*

|             |                 |                                                               |       |
|-------------|-----------------|---------------------------------------------------------------|-------|
| gb:MT020781 | Organism:Severe | CCAAATTTCAAAGATCAAGTCATTTTGTGTAATAAGCATATTGACGCATACAAAAACATTC | 29350 |
| gb:MT007544 | Organism:Severe | CCAAATTTCAAAGATCAAGTCATTTTGTGTAATAAGCATATTGACGCATACAAAAACATTC | 29362 |
| gb:MN994467 | Organism:Severe | CCAAATTTCAAAGATCAAGTCATTTTGTGTAATAAGCATATTGACGCATACAAAAACATTC | 29362 |
| gb:MT044257 | Organism:Severe | CCAAATTTCAAAGATCAAGTCATTTTGTGTAATAAGCATATTGACGCATACAAAAACATTC | 29362 |
| gb:MT106054 | Organism:Severe | CCAAATTTCAAAGATCAAGTCATTTTGTGTAATAAGCATATTGACGCATACAAAAACATTC | 29362 |
| gb:MT049951 | Organism:Severe | CCAAATTTCAAAGATCAAGTCATTTTGTGTAATAAGCATATTGACGCATACAAAAACATTC | 29362 |
| gb:MN975262 | Organism:Severe | CCAAATTTCAAAGATCAAGTCATTTTGTGTAATAAGCATATTGACGCATACAAAAACATTC | 29362 |
| gb:MT106052 | Organism:Severe | CCAAATTTCAAAGATCAAGTCATTTTGTGTAATAAGCATATTGACGCATACAAAAACATTC | 29362 |
| gb:LC522975 | Organism:Severe | CCAAATTTCAAAGATCAAGTCATTTTGTGTAATAAGCATATTGACGCATACAAAAACATTC | 29359 |
| gb:LC522973 | Organism:Severe | CCAAATTTCAAAGATCAAGTCATTTTGTGTAATAAGCATATTGACGCATACAAAAACATTC | 29359 |
| gb:LC522974 | Organism:Severe | CCAAATTTCAAAGATCAAGTCATTTTGTGTAATAAGCATATTGACGCATACAAAAACATTC | 29359 |
| gb:MN985325 | Organism:Severe | CCAAATTTCAAAGATCAAGTCATTTTGTGTAATAAGCATATTGACGCATACAAAAACATTC | 29362 |
| gb:MT020881 | Organism:Severe | CCAAATTTCAAAGATCAAGTCATTTTGTGTAATAAGCATATTGACGCATACAAAAACATTC | 29362 |
| gb:MT020880 | Organism:Severe | CCAAATTTCAAAGATCAAGTCATTTTGTGTAATAAGCATATTGACGCATACAAAAACATTC | 29362 |
| gb:MT066175 | Organism:Severe | CCAAATTTCAAAGATCAAGTCATTTTGTGTAATAAGCATATTGACGCATACAAAAACATTC | 29362 |
| gb:MN997409 | Organism:Severe | CCAAATTTCAAAGATCAAGTCATTTTGTGTAATAAGCATATTGACGCATACAAAAACATTC | 29362 |
| gb:MN938384 | Organism:Severe | CCAAATTTCAAAGATCAAGTCATTTTGTGTAATAAGCATATTGACGCATACAAAAACATTC | 29330 |
| gb:MT044258 | Organism:Severe | CCAAATTTCAAAGATCAAGTCATTTTGTGTAATAAGCATATTGACGCATACAAAAACATTC | 29338 |
| gb:MT039890 | Organism:Severe | CCAAATTTCAAAGATCAAGTCATTTTGTGTAATAAGCATATTGACGCATACAAAAACATTC | 29362 |
| gb:MN988713 | Organism:Severe | CCAAATTTCAAAGATCAAGTCATTTTGTGTAATAAGCATATTGACGCATACAAAAACATTC | 29362 |
| gb:LC521925 | Organism:Severe | CCAAATTTCAAAGATCAAGTCATTTTGTGTAATAAGCATATTGACGCATACAAAAACATTC | 29335 |
| gb:MT093571 | Organism:Severe | CCAAATTTCAAAGATCAAGTCATTTTGTGTAATAAGCATATTGACGCATACAAAAACATTC | 29362 |
| gb:MT039887 | Organism:Severe | CCAAATTTCAAAGATCAAGTCATTTTGTGTAATAAGCATATTGACGCATACAAAAACATTC | 29359 |
| gb:MT019530 | Organism:Severe | CCAAATTTCAAAGATCAAGTCATTTTGTGTAATAAGCATATTGACGCATACAAAAACATTC | 29362 |
| gb:MT039888 | Organism:Severe | CCAAATTTCAAAGATCAAGTCATTTTGTGTAATAAGCATATTGACGCATACAAAAACATTC | 29362 |
| gb:LC522972 | Organism:Severe | TCAAATTTCAAAGATCAAGTCATTTTGTGTAATAAGCATATTGACGCATACAAAAACATTC | 29359 |
| gb:MT027063 | Organism:Severe | CCAAATTTCAAAGATCAAGTCATTTTGTGTAATAAGCATATTGACGCATACAAAAACATTC | 29362 |
| gb:MT027062 | Organism:Severe | CCAAATTTCAAAGATCAAGTCATTTTGTGTAATAAGCATATTGACGCATACAAAAACATTC | 29362 |
| gb:MT019529 | Organism:Severe | CCAAATTTCAAAGATCAAGTCATTTTGTGTAATAAGCATATTGACGCATACAAAAACATTC | 29362 |
| gb:MN996529 | Organism:Severe | CCAAATTTCAAAGATCAAGTCATTTTGTGTAATAAGCATATTGACGCATACAAAAACATTC | 29350 |
| gb:MN996531 | Organism:Severe | CCAAATTTCAAAGATCAAGTCATTTTGTGTAATAAGCATATTGACGCATACAAAAACATTC | 29349 |
| gb:MT066176 | Organism:Severe | CCAAATTTCAAAGATCAAGTCATTTTGTGTAATAAGCATATTGACGCATACAAAAACATTC | 29362 |
| gb:MT027064 | Organism:Severe | CCAAATTTCAAAGATCAAGTCATTTTGTGTAATAAGCATATTGACGCATACAAAAACATTC | 29362 |
| gb:MN994468 | Organism:Severe | CCAAATTTCAAAGATCAAGTCATTTTGTGTAATAAGCATATTGACGCATACAAAAACATTC | 29362 |
| gb:MT072688 | Organism:Severe | CCAAATTTCAAAGATCAAGTCATTTTGTGTAATAAGCATATTGACGCATACAAAAACATTC | 29347 |
| gb:MN996527 | Organism:Severe | CCAAATTTCAAAGATCAAGTCATTTTGTGTAATAAGCATATTGACGCATACAAAAACATTC | 29329 |
| gb:MT093631 | Organism:Severe | CCAAATTTCAAAGATCAAGTCATTTTGTGTAATAAGCATATTGACGCATACAAAAACATTC | 29400 |
| gb:MT106053 | Organism:Severe | CCAAATTTCAAAGATCAAGTCATTTTGTGTAATAAGCATATTGACGCATACAAAAACATTC | 29362 |
| gb:MT019533 | Organism:Severe | CCAAATTTCAAAGATCAAGTCATTTTGTGTAATAAGCATATTGACGCATACAAAAACATTC | 29362 |
| gb:MT019531 | Organism:Severe | CCAAATTTCAAAGATCAAGTCATTTTGTGTAATAAGCATATTGACGCATACAAAAACATTC | 29362 |
| gb:MN996528 | Organism:Severe | CCAAATTTCAAAGATCAAGTCATTTTGTGTAATAAGCATATTGACGCATACAAAAACATTC | 29362 |
| gb:MN996530 | Organism:Severe | CCAAATTTCAAAGATCAAGTCATTTTGTGTAATAAGCATATTGACGCATACAAAAACATTC | 29348 |
| gb:MN908947 | Organism:Severe | CCAAATTTCAAAGATCAAGTCATTTTGTGTAATAAGCATATTGACGCATACAAAAACATTC | 29362 |
| gb:MT019532 | Organism:Severe | CCAAATTTCAAAGATCAAGTCATTTTGTGTAATAAGCATATTGACGCATACAAAAACATTC | 29362 |

\*\*\*\*\*

|             |                 |                                                             |       |
|-------------|-----------------|-------------------------------------------------------------|-------|
| gb:MT020781 | Organism:Severe | CCACCAACAGAGCCTAAAAAGGACAAAAAGAAGAAGGCTGATGAACTCAAGCCTTACCG | 29410 |
| gb:MT007544 | Organism:Severe | CCACCAACAGAGCCTAAAAAGGACAAAAAGAAGAAGGCTGATGAACTCAAGCCTTACCG | 29422 |
| gb:MN994467 | Organism:Severe | CCACCAACAGAGCCTAAAAAGGACAAAAAGAAGAAGGCTGATGAACTCAAGCCTTACCG | 29422 |
| gb:MT044257 | Organism:Severe | CCACCAACAGAGCCTAAAAAGGACAAAAAGAAGAAGGCTGATGAACTCAAGCCTTACCG | 29422 |
| gb:MT106054 | Organism:Severe | CCACCAACAGAGCCTAAAAAGGACAAAAAGAAGAAGGCTGATGAACTCAAGCCTTACCG | 29422 |
| gb:MT049951 | Organism:Severe | CCACCAACAGAGCCTAAAAAGGACAAAAAGAAGAAGGCTGATGAACTCAAGCCTTACCG | 29422 |
| gb:MN975262 | Organism:Severe | CCACCAACAGAGCCTAAAAAGGACAAAAAGAAGAAGGCTGATGAACTCAAGCCTTACCG | 29422 |
| gb:MT106052 | Organism:Severe | CCACCAACAGAGCCTAAAAAGGACAAAAAGAAGAAGGCTGATGAACTCAAGCCTTACCG | 29422 |
| gb:LC522975 | Organism:Severe | CCACCAACAGAGCCTAAAAAGGACAAAAAGAAGAAGGCTGATGAACTCAAGCCTTACCG | 29419 |
| gb:LC522973 | Organism:Severe | CCACCAACAGAGCCTAAAAAGGACAAAAAGAAGAAGGCTGATGAACTCAAGCCTTACCG | 29419 |
| gb:LC522974 | Organism:Severe | CCACCAACAGAGCCTAAAAAGGACAAAAAGAAGAAGGCTGATGAACTCAAGCCTTACCG | 29419 |

|             |                  |                                                             |       |
|-------------|------------------|-------------------------------------------------------------|-------|
| gb:MN985325 | Organism: Severe | CCACCAACAGAGCCTAAAAAGGACAAAAAGAAGAAGGCTGATGAACTCAAGCCTTACCG | 29422 |
| gb:MT020881 | Organism: Severe | CCACCAACAGAGCCTAAAAAGGACAAAAAGAAGAAGGCTGATGAACTCAAGCCTTACCG | 29422 |
| gb:MT020880 | Organism: Severe | CCACCAACAGAGCCTAAAAAGGACAAAAAGAAGAAGGCTGATGAACTCAAGCCTTACCG | 29422 |
| gb:MT066175 | Organism: Severe | CCACCAACAGAGCCTAAAAAGGACAAAAAGAAGAAGGCTGATGAACTCAAGCCTTACCG | 29422 |
| gb:MN997409 | Organism: Severe | CCACCAACAGAGCCTAAAAAGGACAAAAAGAAGAAGGCTGATGAACTCAAGCCTTACCG | 29422 |
| gb:MN938384 | Organism: Severe | CCACCAACAGAGCCTAAAAAGGACAAAAAGAAGAAGGCTGATGAACTCAAGCCTTACCG | 29390 |
| gb:MT044258 | Organism: Severe | CCACCAACAGAGCCTAAAAAGGACAAAAAGAAGAAGGCTGATGAACTCAAGCCTTACCG | 29398 |
| gb:MT039890 | Organism: Severe | CCACCAACAGAGCCTAAAAAGGACAAAAAGAAGAAGGCTGATGAACTCAAGCCTTACCG | 29422 |
| gb:MN988713 | Organism: Severe | CCACCAACAGAGCCTAAAAAGGACAAAAAGAAGAAGGCTGATGAACTCAAGCCTTACCG | 29422 |
| gb:LC521925 | Organism: Severe | CCACCAACAGAGCCTAAAAAGGACAAAAAGAAGAAGGCTGATGAACTCAAGCCTTACCG | 29395 |
| gb:MT093571 | Organism: Severe | CCACCAACAGAGCCTAAAAAGGACAAAAAGAAGAAGGCTGATGAACTCAAGCCTTACCG | 29422 |
| gb:MT039887 | Organism: Severe | CCACCAACAGAGCCTAAAAAGGACAAAAAGAAGAAGGCTGATGAACTCAAGCCTTACCG | 29419 |
| gb:MT019530 | Organism: Severe | CCACCAACAGAGCCTAAAAAGGACAAAAAGAAGAAGGCTGATGAACTCAAGCCTTACCG | 29422 |
| gb:MT039888 | Organism: Severe | CCACCAACAGAGCCTAAAAAGGACAAAAAGAAGAAGGCTGATGAACTCAAGCCTTACCG | 29422 |
| gb:LC522972 | Organism: Severe | CCACCAACAGAGCCTAAAAAGGACAAAAAGAAGAAGGCTGATGAACTCAAGCCTTACCG | 29419 |
| gb:MT027063 | Organism: Severe | CCACCAACAGAGCCTAAAAAGGACAAAAAGAAGAAGGCTGATGAACTCAAGCCTTACCG | 29422 |
| gb:MT027062 | Organism: Severe | CCACCAACAGAGCCTAAAAAGGACAAAAAGAAGAAGGCTGATGAACTCAAGCCTTACCG | 29422 |
| gb:MT019529 | Organism: Severe | CCACCAACAGAGCCTAAAAAGGACAAAAAGAAGAAGGCTGATGAACTCAAGCCTTACCG | 29422 |
| gb:MN996529 | Organism: Severe | CCACCAACAGAGCCTAAAAAGGACAAAAAGAAGAAGGCTGATGAACTCAAGCCTTACCG | 29410 |
| gb:MN996531 | Organism: Severe | CCACCAACAGAGCCTAAAAAGGACAAAAAGAAGAAGGCTGATGAACTCAAGCCTTACCG | 29409 |
| gb:MT066176 | Organism: Severe | CCACCAACAGAGCCTAAAAAGGACAAAAAGAAGAAGGCTGATGAACTCAAGCCTTACCG | 29422 |
| gb:MT027064 | Organism: Severe | CCACCAACAGAGCCTAAAAAGGACAAAAAGAAGAAGGCTGATGAACTCAAGCCTTACCG | 29422 |
| gb:MN994468 | Organism: Severe | CCACCAACAGAGCCTAAAAAGGACAAAAAGAAGAAGGCTGATGAACTCAAGCCTTACCG | 29422 |
| gb:MT072688 | Organism: Severe | CCACCAACAGAGCCTAAAAAGGACAAAAAGAAGAAGGCTGATGAACTCAAGCCTTACCG | 29407 |
| gb:MN996527 | Organism: Severe | CCACCAACAGAGCCTAAAAAGGACAAAAAGAAGAAGGCTGATGAACTCAAGCCTTACCG | 29389 |
| gb:MT093631 | Organism: Severe | CCACCAACAGAGCCTAAAAAGGACAAAAAGAAGAAGGCTGATGAACTCAAGCCTTACCG | 29460 |
| gb:MT106053 | Organism: Severe | CCACCAACAGAGCCTAAAAAGGACAAAAAGAAGAAGGCTGATGAACTCAAGCCTTACCG | 29422 |
| gb:MT019533 | Organism: Severe | CCACCAACAGAGCCTAAAAAGGACAAAAAGAAGAAGGCTGATGAACTCAAGCCTTACCG | 29422 |
| gb:MT019531 | Organism: Severe | CCACCAACAGAGCCTAAAAAGGACAAAAAGAAGAAGGCTGATGAACTCAAGCCTTACCG | 29422 |
| gb:MN996528 | Organism: Severe | CCACCAACAGAGCCTAAAAAGGACAAAAAGAAGAAGGCTGATGAACTCAAGCCTTACCG | 29422 |
| gb:MN996530 | Organism: Severe | CCACCAACAGAGCCTAAAAAGGACAAAAAGAAGAAGGCTGATGAACTCAAGCCTTACCG | 29408 |
| gb:MN908947 | Organism: Severe | CCACCAACAGAGCCTAAAAAGGACAAAAAGAAGAAGGCTGATGAACTCAAGCCTTACCG | 29422 |
| gb:MT019532 | Organism: Severe | CCACCAACAGAGCCTAAAAAGGACAAAAAGAAGAAGGCTGATGAACTCAAGCCTTACCG | 29422 |

\*\*\*\*\*

|             |                  |                                                              |       |
|-------------|------------------|--------------------------------------------------------------|-------|
| gb:MT020781 | Organism: Severe | CAGAGACAGAAGAAACAGCAAACCTGTGACTCTTCTTCTGCTGCAGATTTGGATGATTTT | 29470 |
| gb:MT007544 | Organism: Severe | CAGAGACAGAAGAAACAGCAAACCTGTGACTCTTCTTCTGCTGCAGATTTGGATGATTTT | 29482 |
| gb:MN994467 | Organism: Severe | CAGAGACAGAAGAAACAGCAAACCTGTGACTCTTCTTCTGCTGCAGATTTGGATGATTTT | 29482 |
| gb:MT044257 | Organism: Severe | CAGAGACAGAAGAAACAGCAAACCTGTGACTCTTCTTCTGCTGCAGATTTGGATGATTTT | 29482 |
| gb:MT106054 | Organism: Severe | CAGAGACAGAAGAAACAGCAAACCTGTGACTCTTCTTCTGCTGCAGATTTGGATGATTTT | 29482 |
| gb:MT049951 | Organism: Severe | CAGAGACAGAAGAAACAGCAAACCTGTGACTCTTCTTCTGCTGCAGATTTGGATGATTTT | 29482 |
| gb:MN975262 | Organism: Severe | CAGAGACAGAAGAAACAGCAAACCTGTGACTCTTCTTCTGCTGCAGATTTGGATGATTTT | 29482 |
| gb:MT106052 | Organism: Severe | CAGAGACAGAAGAAACAGCAAACCTGTGACTCTTCTTCTGCTGCAGATTTGGATGATTTT | 29482 |
| gb:LC522975 | Organism: Severe | CAGAGACAGAAGAAACAGCAAACCTGTGACTCTTCTTCTGCTGCAGATTTGGATGATTTT | 29479 |
| gb:LC522973 | Organism: Severe | CAGAGACAGAAGAAACAGCAAACCTGTGACTCTTCTTCTGCTGCAGATTTGGATGATTTT | 29479 |
| gb:LC522974 | Organism: Severe | CAGAGACAGAAGAAACAGCAAACCTGTGACTCTTCTTCTGCTGCAGATTTGGATGATTTT | 29479 |
| gb:MN985325 | Organism: Severe | CAGAGACAGAAGAAACAGCAAACCTGTGACTCTTCTTCTGCTGCAGATTTGGATGATTTT | 29482 |
| gb:MT020881 | Organism: Severe | CAGAGACAGAAGAAACAGCAAACCTGTGACTCTTCTTCTGCTGCAGATTTGGATGATTTT | 29482 |
| gb:MT020880 | Organism: Severe | CAGAGACAGAAGAAACAGCAAACCTGTGACTCTTCTTCTGCTGCAGATTTGGATGATTTT | 29482 |
| gb:MT066175 | Organism: Severe | CAGAGACAGAAGAAACAGCAAACCTGTGACTCTTCTTCTGCTGCAGATTTGGATGATTTT | 29482 |
| gb:MN997409 | Organism: Severe | CAGAGACAGAAGAAACAGCAAACCTGTGACTCTTCTTCTGCTGCAGATTTGGATGATTTT | 29482 |
| gb:MN938384 | Organism: Severe | CAGAGACAGAAGAAACAGCAAACCTGTGACTCTTCTTCTGCTGCAGATTTGGATGATTTT | 29450 |
| gb:MT044258 | Organism: Severe | CAGAGACAGAAGAAACAGCAAACCTGTGACTCTTCTTCTGCTGCAGATTTGGATGATTTT | 29458 |
| gb:MT039890 | Organism: Severe | CAGAGACAGAAGAAACAGCAAACCTGTGACTCTTCTTCTGCTGCAGATTTGGATGATTTT | 29482 |
| gb:MN988713 | Organism: Severe | CAGAGACAGAAGAAACAGCAAACCTGTGACTCTTCTTCTGCTGCAGATTTGGATGATTTT | 29482 |
| gb:LC521925 | Organism: Severe | CAGAGACAGAAGAAACAGCAAACCTGTGACTCTTCTTCTGCTGCAGATTTGGATGATTTT | 29455 |
| gb:MT093571 | Organism: Severe | CAGAGACAGAAGAAACAGCAAACCTGTGACTCTTCTTCTGCTGCAGATTTGGATGATTTT | 29482 |
| gb:MT039887 | Organism: Severe | CAGAGACAGAAGAAACAGCAAACCTGTGACTCTTCTTCTGCTGCAGATTTGGATGATTTT | 29479 |
| gb:MT019530 | Organism: Severe | CAGAGACAGAAGAAACAGCAAACCTGTGACTCTTCTTCTGCTGCAGATTTGGATGATTTT | 29482 |
| gb:MT039888 | Organism: Severe | CAGAGACAGAAGAAACAGCAAACCTGTGACTCTTCTTCTGCTGCAGATTTGGATGATTTT | 29482 |
| gb:LC522972 | Organism: Severe | CAGAGACAGAAGAAACAGCAAACCTGTGACTCTTCTTCTGCTGCAGATTTGGATGATTTT | 29479 |
| gb:MT027063 | Organism: Severe | CAGAGACAGAAGAAACAGCAAACCTGTGACTCTTCTTCTGCTGCAGATTTGGATGATTTT | 29482 |
| gb:MT027062 | Organism: Severe | CAGAGACAGAAGAAACAGCAAACCTGTGACTCTTCTTCTGCTGCAGATTTGGATGATTTT | 29482 |
| gb:MT019529 | Organism: Severe | CAGAGACAGAAGAAACAGCAAACCTGTGACTCTTCTTCTGCTGCAGATTTGGATGATTTT | 29482 |
| gb:MN996529 | Organism: Severe | CAGAGACAGAAGAAACAGCAAACCTGTGACTCTTCTTCTGCTGCAGATTTGGATGATTTT | 29470 |

|             |                 |                                                             |       |
|-------------|-----------------|-------------------------------------------------------------|-------|
| gb:MN996531 | Organism:Severe | CAGAGACAGAAGAAACAGCAAACGTGACTCTTCTTCTGCTGCAGATTTGGATGATTTCT | 29469 |
| gb:MT066176 | Organism:Severe | CAGAGACAGAAGAAACAGCAAACGTGACTCTTCTTCTGCTGCAGATTTGGATGATTTCT | 29482 |
| gb:MT027064 | Organism:Severe | CAGAGACAGAAGAAACAGCAAACGTGACTCTTCTTCTGCTGCAGATTTGGATGATTTCT | 29482 |
| gb:MN994468 | Organism:Severe | CAGAGACAGAAGAAACAGCAAACGTGACTCTTCTTCTGCTGCAGATTTGGATGATTTCT | 29482 |
| gb:MT072688 | Organism:Severe | CAGAGACAGAAGAAACAGCAAACGTGACTCTTCTTCTGCTGCAGATTTGGATGATTTCT | 29467 |
| gb:MN996527 | Organism:Severe | CAGAGACAGAAGAAACAGCAAACGTGACTCTTCTTCTGCTGCAGATTTGGATGATTTCT | 29449 |
| gb:MT093631 | Organism:Severe | CAGAGACAGAAGAAACAGCAAACGTGACTCTTCTTCTGCTGCAGATTTGGATGATTTCT | 29520 |
| gb:MT106053 | Organism:Severe | CAGAGACAGAAGAAACAGCAAACGTGACTCTTCTTCTGCTGCAGATTTGGATGATTTCT | 29482 |
| gb:MT019533 | Organism:Severe | CAGAGACAGAAGAAACAGCAAACGTGACTCTTCTTCTGCTGCAGATTTGGATGATTTCT | 29482 |
| gb:MT019531 | Organism:Severe | CAGAGACAGAAGAAACAGCAAACGTGACTCTTCTTCTGCTGCAGATTTGGATGATTTCT | 29482 |
| gb:MN996528 | Organism:Severe | CAGAGACAGAAGAAACAGCAAACGTGACTCTTCTTCTGCTGCAGATTTGGATGATTTCT | 29482 |
| gb:MN996530 | Organism:Severe | CAGAGACAGAAGAAACAGCAAACGTGACTCTTCTTCTGCTGCAGATTTGGATGATTTCT | 29468 |
| gb:MN908947 | Organism:Severe | CAGAGACAGAAGAAACAGCAAACGTGACTCTTCTTCTGCTGCAGATTTGGATGATTTCT | 29482 |
| gb:MT019532 | Organism:Severe | CAGAGACAGAAGAAACAGCAAACGTGACTCTTCTTCTGCTGCAGATTTGGATGATTTCT | 29482 |

\*\*\*\*\*

|             |                 |                                                            |       |
|-------------|-----------------|------------------------------------------------------------|-------|
| gb:MT020781 | Organism:Severe | TCCAACAATTGCAACAATCCATGAGCAGTGTGACTCAACTCAGGCCATAAATCATGCA | 29530 |
| gb:MT007544 | Organism:Severe | TCCAACAATTGCAACAATCCATGAGCAGTGTGACTCAACTCAGGCCATAAATCATGCA | 29542 |
| gb:MN994467 | Organism:Severe | TCCAACAATTGCAACAATCCATGAGCAGTGTGACTCAACTCAGGCCATAAATCATGCA | 29542 |
| gb:MT044257 | Organism:Severe | TCCAACAATTGCAACAATCCATGAGCAGTGTGACTCAACTCAGGCCATAAATCATGCA | 29542 |
| gb:MT106054 | Organism:Severe | TCCAACAATTGCAACAATCCATGAGCAGTGTGACTCAACTCAGGCCATAAATCATGCA | 29542 |
| gb:MT049951 | Organism:Severe | TCCAACAATTGCAACAATCCATGAGCAGTGTGACTCAACTCAGGCCATAAATCATGCA | 29542 |
| gb:MN975262 | Organism:Severe | TCCAACAATTGCAACAATCCATGAGCAGTGTGACTCAACTCAGGCCATAAATCATGCA | 29542 |
| gb:MT106052 | Organism:Severe | TCCAACAATTGCAACAATCCATGAGCAGTGTGACTCAACTCAGGCCATAAATCATGCA | 29542 |
| gb:LC522975 | Organism:Severe | TCCAACAATTGCAACAATCCATGAGCAGTGTGACTCAACTCAGGCCATAAATCATGCA | 29539 |
| gb:LC522973 | Organism:Severe | TCCAACAATTGCAACAATCCATGAGCAGTGTGACTCAACTCAGGCCATAAATCATGCA | 29539 |
| gb:LC522974 | Organism:Severe | TCCAACAATTGCAACAATCCATGAGCAGTGTGACTCAACTCAGGCCATAAATCATGCA | 29539 |
| gb:MN985325 | Organism:Severe | TCCAACAATTGCAACAATCCATGAGCAGTGTGACTCAACTCAGGCCATAAATCATGCA | 29542 |
| gb:MT020881 | Organism:Severe | TCCAACAATTGCAACAATCCATGAGCAGTGTGACTCAACTCAGGCCATAAATCATGCA | 29542 |
| gb:MT020880 | Organism:Severe | TCCAACAATTGCAACAATCCATGAGCAGTGTGACTCAACTCAGGCCATAAATCATGCA | 29542 |
| gb:MT066175 | Organism:Severe | TCCAACAATTGCAACAATCCATGAGCAGTGTGACTCAACTCAGGCCATAAATCATGCA | 29542 |
| gb:MN997409 | Organism:Severe | TCCAACAATTGCAACAATCCATGAGCAGTGTGACTCAACTCAGGCCATAAATCATGCA | 29542 |
| gb:MN938384 | Organism:Severe | TCCAACAATTGCAACAATCCATGAGCAGTGTGACTCAACTCAGGCCATAAATCATGCA | 29510 |
| gb:MT044258 | Organism:Severe | TCCAACAATTGCAACAATCCATGAGCAGTGTGACTCAACTCAGGCCATAAATCATGCA | 29518 |
| gb:MT039890 | Organism:Severe | TCCAACAATTGCAACAATCCATGAGCAGTGTGACTCAACTCAGGCCATAAATCATGCA | 29542 |
| gb:MN988713 | Organism:Severe | TCCAACAATTGCAACAATCCATGAGCAGTGTGACTCAACTCAGGCCATAAATCATGCA | 29542 |
| gb:LC521925 | Organism:Severe | TCCAACAATTGCAACAATCCATGAGCAGTGTGACTCAACTCAGGCCATAAATCATGCA | 29515 |
| gb:MT093571 | Organism:Severe | TCCAACAATTGCAACAATCCATGAGCAGTGTGACTCAACTCAGGCCATAAATCATGCA | 29542 |
| gb:MT039887 | Organism:Severe | TCCAACAATTGCAACAATCCATGAGCAGTGTGACTCAACTCAGGCCATAAATCATGCA | 29539 |
| gb:MT019530 | Organism:Severe | TCCAACAATTGCAACAATCCATGAGCAGTGTGACTCAACTCAGGCCATAAATCATGCA | 29542 |
| gb:MT039888 | Organism:Severe | TCCAACAATTGCAACAATCCATGAGCAGTGTGACTCAACTCAGGCCATAAATCATGCA | 29542 |
| gb:LC522972 | Organism:Severe | TCCAACAATTGCAACAATCCATGAGCAGTGTGACTCAACTCAGGCCATAAATCATGCA | 29539 |
| gb:MT027063 | Organism:Severe | TCCAACAATTGCAACAATCCATGAGCAGTGTGACTCAACTCAGGCCATAAATCATGCA | 29542 |
| gb:MT027062 | Organism:Severe | TCCAACAATTGCAACAATCCATGAGCAGTGTGACTCAACTCAGGCCATAAATCATGCA | 29542 |
| gb:MT019529 | Organism:Severe | TCCAACAATTGCAACAATCCATGAGCAGTGTGACTCAACTCAGGCCATAAATCATGCA | 29542 |
| gb:MN996529 | Organism:Severe | TCCAACAATTGCAACAATCCATGAGCAGTGTGACTCAACTCAGGCCATAAATCATGCA | 29530 |
| gb:MN996531 | Organism:Severe | TCCAACAATTGCAACAATCCATGAGCAGTGTGACTCAACTCAGGCCATAAATCATGCA | 29529 |
| gb:MT066176 | Organism:Severe | TCCAACAATTGCAACAATCCATGAGCAGTGTGACTCAACTCAGGCCATAAATCATGCA | 29542 |
| gb:MT027064 | Organism:Severe | TCCAACAATTGCAACAATCCATGAGCAGTGTGACTCAACTCAGGCCATAAATCATGCA | 29542 |
| gb:MN994468 | Organism:Severe | TCCAACAATTGCAACAATCCATGAGCAGTGTGACTCAACTCAGGCCATAAATCATGCA | 29542 |
| gb:MT072688 | Organism:Severe | TCCAACAATTGCAACAATCCATGAGCAGTGTGACTCAACTCAGGCCATAAATCATGCA | 29527 |
| gb:MN996527 | Organism:Severe | TCCAACAATTGCAACAATCCATGAGCAGTGTGACTCAACTCAGGCCATAAATCATGCA | 29509 |
| gb:MT093631 | Organism:Severe | TCCAACAATTGCAACAATCCATGAGCAGTGTGACTCAACTCAGGCCATAAATCATGCA | 29580 |
| gb:MT106053 | Organism:Severe | TCCAACAATTGCAACAATCCATGAGCAGTGTGACTCAACTCAGGCCATAAATCATGCA | 29542 |
| gb:MT019533 | Organism:Severe | TCCAACAATTGCAACAATCCATGAGCAGTGTGACTCAACTCAGGCCATAAATCATGCA | 29542 |
| gb:MT019531 | Organism:Severe | TCCAACAATTGCAACAATCCATGAGCAGTGTGACTCAACTCAGGCCATAAATCATGCA | 29542 |
| gb:MN996528 | Organism:Severe | TCCAACAATTGCAACAATCCATGAGCAGTGTGACTCAACTCAGGCCATAAATCATGCA | 29542 |
| gb:MN996530 | Organism:Severe | TCCAACAATTGCAACAATCCATGAGCAGTGTGACTCAACTCAGGCCATAAATCATGCA | 29528 |
| gb:MN908947 | Organism:Severe | TCCAACAATTGCAACAATCCATGAGCAGTGTGACTCAACTCAGGCCATAAATCATGCA | 29542 |
| gb:MT019532 | Organism:Severe | TCCAACAATTGCAACAATCCATGAGCAGTGTGACTCAACTCAGGCCATAAATCATGCA | 29542 |

\*\*\*\*\*

|             |                 |                                                              |       |
|-------------|-----------------|--------------------------------------------------------------|-------|
| gb:MT020781 | Organism:Severe | GACCACACAAGGCAGATGGGCTATATAAACGTTTTTCGTTTTCCGTTTACGATATATAGT | 29590 |
| gb:MT007544 | Organism:Severe | GACCACACAAGGCAGATGGGCTATATAAACGTTTTTCGTTTTCCGTTTACGATATATAGT | 29602 |
| gb:MN994467 | Organism:Severe | GACCACACAAGGCAGATGGGCTATATAAACGTTTTTCGTTTTCCGTTTACGATATATAGT | 29602 |

|             |                 |                                                             |       |
|-------------|-----------------|-------------------------------------------------------------|-------|
| gb:MT044257 | Organism:Severe | GACCACACAAGGCAGATGGGCTATATAAACGTTTTCGCTTTCCGTTTACGATATATAGT | 29602 |
| gb:MT106054 | Organism:Severe | GACCACACAAGGCAGATGGGCTATATAAACGTTTTCGCTTTCCGTTTACGATATATAGT | 29602 |
| gb:MT049951 | Organism:Severe | GACCACACAAGGCAGATGGGCTATATAAACGTTTTCGCTTTCCGTTTACGATATATAGT | 29602 |
| gb:MN975262 | Organism:Severe | GACCACACAAGGCAGATGGGCTATATAAACGTTTTCGCTTTCCGTTTACGATATATAGT | 29602 |
| gb:MT106052 | Organism:Severe | GACCACACAAGGCAGATGGGCTATATAAACGTTTTCGCTTTCCGTTTACGATATATAGT | 29602 |
| gb:LC522975 | Organism:Severe | GACCACACAAGGCAGATGGGCTATATAAACGTTTTCGCTTTCCGTTTACGATATATAGT | 29599 |
| gb:LC522973 | Organism:Severe | GACCACACAAGGCAGATGGGCTATATAAACGTTTTCGCTTTCCGTTTACGATATATAGT | 29599 |
| gb:LC522974 | Organism:Severe | GACCACACAAGGCAGATGGGCTATATAAACGTTTTCGCTTTCCGTTTACGATATATAGT | 29599 |
| gb:MN985325 | Organism:Severe | GACCACACAAGGCAGATGGGCTATATAAACGTTTTCGCTTTCCGTTTACGATATATAGT | 29602 |
| gb:MT020881 | Organism:Severe | GACCACACAAGGCAGATGGGCTATATAAACGTTTTCGCTTTCCGTTTACGATATATAGT | 29602 |
| gb:MT020880 | Organism:Severe | GACCACACAAGGCAGATGGGCTATATAAACGTTTTCGCTTTCCGTTTACGATATATAGT | 29602 |
| gb:MT066175 | Organism:Severe | GACCACACAAGGCAGATGGGCTATATAAACGTTTTCGCTTTCCGTTTACGATATATAGT | 29602 |
| gb:MN997409 | Organism:Severe | GACCACACAAGGCAGATGGGCTATATAAACGTTTTCGCTTTCCGTTTACGATATATAGT | 29602 |
| gb:MN938384 | Organism:Severe | GACCACACAAGGCAGATGGGCTATATAAACGTTTTCGCTTTCCGTTTACGATATATAGT | 29570 |
| gb:MT044258 | Organism:Severe | GACCACACAAGGCAGATGGGCTATATAAACGTTTTCGCTTTCCGTTTACGATATATAGT | 29578 |
| gb:MT039890 | Organism:Severe | GACCACACAAGGCAGATGGGCTATATAAACGTTTTCGCTTTCCGTTTACGATATATAGT | 29602 |
| gb:MN988713 | Organism:Severe | GACCACACAAGGCAGATGGGCTATATAAACGTTTTCGCTTTCCGTTTACGATATATAGT | 29602 |
| gb:LC521925 | Organism:Severe | GACCACACAAGGCAGATGGGCTATATAAACGTTTTCGCTTTCCGTTTACGATATATAGT | 29575 |
| gb:MT093571 | Organism:Severe | GACCACACAAGGCAGATGGGCTATATAAACGTTTTCGCTTTCCGTTTACGATATATAGT | 29602 |
| gb:MT039887 | Organism:Severe | GACCACACAAGGCAGATGGGCTATATAAACGTTTTCGCTTTCCGTTTACGATATATAGT | 29599 |
| gb:MT019530 | Organism:Severe | GACCACACAAGGCAGATGGGCTATATAAACGTTTTCGCTTTCCGTTTACGATATATAGT | 29602 |
| gb:MT039888 | Organism:Severe | GACCACACAAGGCAGATGGGCTATATAAACGTTTTCGCTTTCCGTTTACGATATATAGT | 29602 |
| gb:LC522972 | Organism:Severe | GACCACACAAGGCAGATGGGCTATATAAACGTTTTCGCTTTCCGTTTACGATATATAGT | 29599 |
| gb:MT027063 | Organism:Severe | GACCACACAAGGCAGATGGGCTATATAAACGTTTTCGCTTTCCGTTTACGATATATAGT | 29602 |
| gb:MT027062 | Organism:Severe | GACCACACAAGGCAGATGGGCTATATAAACGTTTTCGCTTTCCGTTTACGATATATAGT | 29602 |
| gb:MT019529 | Organism:Severe | GACCACACAAGGCAGATGGGCTATATAAACGTTTTCGCTTTCCGTTTACGATATATAGT | 29602 |
| gb:MN996529 | Organism:Severe | GACCACACAAGGCAGATGGGCTATATAAACGTTTTCGCTTTCCGTTTACGATATATAGT | 29590 |
| gb:MN996531 | Organism:Severe | GACCACACAAGGCAGATGGGCTATATAAACGTTTTCGCTTTCCGTTTACGATATATAGT | 29589 |
| gb:MT066176 | Organism:Severe | GACCACACAAGGCAGATGGGCTATATAAACGTTTTCGCTTTCCGTTTACGATATATAGT | 29602 |
| gb:MT027064 | Organism:Severe | GACCACACAAGGCAGATGGGCTATATAAACGTTTTCGCTTTCCGTTTACGATATATAGT | 29602 |
| gb:MN994468 | Organism:Severe | GACCACACAAGGCAGATGGGCTATATAAACGTTTTCGCTTTCCGTTTACGATATATAGT | 29602 |
| gb:MT072688 | Organism:Severe | GACCACACAAGGCAGATGGGCTATATAAACGTTTTCGCTTTCCGTTTACGATATATAGT | 29587 |
| gb:MN996527 | Organism:Severe | GACCACACAAGGCAGATGGGCTATATAAACGTTTTCGCTTTCCGTTTACGATATATAGT | 29569 |
| gb:MT093631 | Organism:Severe | GACCACACAAGGCAGATGGGCTATATAAACGTTTTCGCTTTCCGTTTACGATATATAGT | 29640 |
| gb:MT106053 | Organism:Severe | GACCACACAAGGCAGATGGGCTATATAAACGTTTTCGCTTTCCGTTTACGATATATAGT | 29602 |
| gb:MT019533 | Organism:Severe | GACCACACAAGGCAGATGGGCTATATAAACGTTTTCGCTTTCCGTTTACGATATATAGT | 29602 |
| gb:MT019531 | Organism:Severe | GACCACACAAGGCAGATGGGCTATATAAACGTTTTCGCTTTCCGTTTACGATATATAGT | 29602 |
| gb:MN996528 | Organism:Severe | GACCACACAAGGCAGATGGGCTATATAAACGTTTTCGCTTTCCGTTTACGATATATAGT | 29602 |
| gb:MN996530 | Organism:Severe | GACCACACAAGGCAGATGGGCTATATAAACGTTTTCGCTTTCCGTTTACGATATATAGT | 29588 |
| gb:MN908947 | Organism:Severe | GACCACACAAGGCAGATGGGCTATATAAACGTTTTCGCTTTCCGTTTACGATATATAGT | 29602 |
| gb:MT019532 | Organism:Severe | GACCACACAAGGCAGATGGGCTATATAAACGTTTTCGCTTTCCGTTTACGATATATAGT | 29602 |

\*\*\*\*\*

|             |                 |                                                              |       |
|-------------|-----------------|--------------------------------------------------------------|-------|
| gb:MT020781 | Organism:Severe | CTACTCTTGTGCAGAATGAATTCTCGTAACTACATAGCACAAGTAGATGTAGTTAACTTT | 29650 |
| gb:MT007544 | Organism:Severe | CTACTCTTGTGCAGAATGAATTCTCGTAACTACATAGCACAAGTAGATGTAGTTAACTTT | 29662 |
| gb:MN994467 | Organism:Severe | CTACTCTTGTGCAGAATGAATTCTCGTAACTACATAGCACAAGTAGATGTAGTTAACTTT | 29662 |
| gb:MT044257 | Organism:Severe | CTACTCTTGTGCAGAATGAATTCTCGTAACTACATAGCACAAGTAGATGTAGTTAACTTT | 29662 |
| gb:MT106054 | Organism:Severe | CTACTCTTGTGCAGAATGAATTCTCGTAACTACATAGCACAAGTAGATGTAGTTAACTTT | 29662 |
| gb:MT049951 | Organism:Severe | CTACTCTTGTGCAGAATGAATTCTCGTAACTACATAGCACAAGTAGATGTAGTTAACTTT | 29662 |
| gb:MN975262 | Organism:Severe | CTACTCTTGTGCAGAATGAATTCTCGTAACTACATAGCACAAGTAGATGTAGTTAACTTT | 29662 |
| gb:MT106052 | Organism:Severe | CTACTCTTGTGCAGAATGAATTCTCGTAACTACATAGCACAAGTAGATGTAGTTAACTTT | 29662 |
| gb:LC522975 | Organism:Severe | CTACTCTTGTGCAGAATGAATTCTCGTAACTACATAGCACAAGTAGATGTAGTTAACTTT | 29659 |
| gb:LC522973 | Organism:Severe | CTACTCTTGTGCAGAATGAATTCTCGTAACTACATAGCACAAGTAGATGTAGTTAACTTT | 29659 |
| gb:LC522974 | Organism:Severe | CTACTCTTGTGCAGAATGAATTCTCGTAACTACATAGCACAAGTAGATGTAGTTAACTTT | 29659 |
| gb:MN985325 | Organism:Severe | CTACTCTTGTGCAGAATGAATTCTCGTAACTACATAGCACAAGTAGATGTAGTTAACTTT | 29662 |
| gb:MT020881 | Organism:Severe | CTACTCTTGTGCAGAATGAATTCTCGTAACTACATAGCACAAGTAGATGTAGTTAACTTT | 29662 |
| gb:MT020880 | Organism:Severe | CTACTCTTGTGCAGAATGAATTCTCGTAACTACATAGCACAAGTAGATGTAGTTAACTTT | 29662 |
| gb:MT066175 | Organism:Severe | CTACTCTTGTGCAGAATGAATTCTCGTAACTACATAGCACAAGTAGATGTAGTTAACTTT | 29662 |
| gb:MN997409 | Organism:Severe | CTACTCTTGTGCAGAATGAATTCTCGTAACTACATAGCACAAGTAGATGTAGTTAACTTT | 29662 |
| gb:MN938384 | Organism:Severe | CTACTCTTGTGCAGAATGAATTCTCGTAACTACATAGCACAAGTAGATGTAGTTAACTTT | 29630 |
| gb:MT044258 | Organism:Severe | CTACTCTTGTGCAGAATGAATTCTCGTAACTACATAGCACAAGTAGATGTAGTTAACTTT | 29638 |
| gb:MT039890 | Organism:Severe | CTACTCTTGTGCAGAATGAATTCTCGTAACTACATAGCACAAGTAGATGTAGTTAACTTT | 29662 |
| gb:MN988713 | Organism:Severe | CTACTCTTGTGCAGAATGAATTCTCGTAACTACATAGCACAAGTAGATGTAGTTAACTTT | 29662 |
| gb:LC521925 | Organism:Severe | CTACTCTTGTGCAGAATGAATTCTCGTAACTACATAGCACAAGTAGATGTAGTTAACTTT | 29635 |
| gb:MT093571 | Organism:Severe | CTACTCTTGTGCAGAATGAATTCTCGTAACTACATAGCACAAGTAGATGTAGTTAACTTT | 29662 |





|             |                  |                                                                       |       |
|-------------|------------------|-----------------------------------------------------------------------|-------|
| gb:MN996530 | Organism: Severe | AATCTCACATAGCAATCTTTAATCAGTGTGTAACATTAGGGAGGACTTGAAAGAGCCACC          | 29708 |
| gb:MN908947 | Organism: Severe | AATCTCACATAGCAATCTTTAATCAGTGTGTAACATTAGGGAGGACTTGAAAGAGCCACC          | 29722 |
| gb:MT019532 | Organism: Severe | AATCTCACATAGCAATCTTTAATCAGTGTGTAACATTAGGGAGGACTTGAAAGAGCCACC<br>***** | 29722 |
| gb:MT020781 | Organism: Severe | ACATTTTCACCGAGGCCACGCGGAGTACGATCGAGTGTACAGTGAACAATGCTAGGGAGA          | 29770 |
| gb:MT007544 | Organism: Severe | ACATTTTCACCGAGGCCACGCGGAGTACGATCGAGTGTACAGTGAACAATGCTAGGGAGA          | 29772 |
| gb:MN994467 | Organism: Severe | ACATTTTCACCGAGGCCACGCGGAGTACGATCGAGTGTACAGTGAACAATGCTAGGGAGA          | 29782 |
| gb:MT044257 | Organism: Severe | ACATTTTCACCGAGGCCACGCGGAGTACGATCGAGTGTACAGTGAACAATGCTAGGGAGA          | 29782 |
| gb:MT106054 | Organism: Severe | ACATTTTCACCGAGGCCACGCGGAGTACGATCGAGTGTACAGTGAACAATGCTAGGGAGA          | 29782 |
| gb:MT049951 | Organism: Severe | ACATTTTCACCGAGGCCACGCGGAGTACGATCGAGTGTACAGTGAACAATGCTAGGGAGA          | 29782 |
| gb:MN975262 | Organism: Severe | ACATTTTCACCGAGGCCACGCGGAGTACGATCGAGTGTACAGTGAACAATGCTAGGGAGA          | 29782 |
| gb:MT106052 | Organism: Severe | ACATTTTCACCGAGGCCACGCGGAGTACGATCGAGTGTACAGTGAACAATGCTAGGGAGA          | 29782 |
| gb:LC522975 | Organism: Severe | ACATTTTCACCGAGGCCACGCGGAGTACGATCGAGTGTACAGTGAACAATGCTAGGGAGA          | 29779 |
| gb:LC522973 | Organism: Severe | ACATTTTCACCGAGGCCACGCGGAGTACGATCGAGTGTACAGTGAACAATGCTAGGGAGA          | 29779 |
| gb:LC522974 | Organism: Severe | ACATTTTCACCGAGGCCACGCGGAGTACGATCGAGTGTACAGTGAACAATGCTAGGGAGA          | 29779 |
| gb:MN985325 | Organism: Severe | ACATTTTCACCGAGGCCACGCGGAGTACGATCGAGTGTACAGTGAACAATGCTAGGGAGA          | 29782 |
| gb:MT020881 | Organism: Severe | ACATTTTCACCGAGGCCACGCGGAGTACGATCGAGTGTACAGTGAACAATGCTAGGGAGA          | 29782 |
| gb:MT020880 | Organism: Severe | ACATTTTCACCGAGGCCACGCGGAGTACGATCGAGTGTACAGTGAACAATGCTAGGGAGA          | 29782 |
| gb:MT066175 | Organism: Severe | ACATTTTCACCGAGGCCACGCGGAGTACGATCGAGTGTACAGTGAACAATGCTAGGGAGA          | 29782 |
| gb:MN997409 | Organism: Severe | ACATTTTCACCGAGGCCACGCGGAGTACGATCGAGTGTACAGTGAACAATGCTAGGGAGA          | 29782 |
| gb:MN938384 | Organism: Severe | ACATTTTCACCGAGGCCACGCGGAGTACGATCGAGTGTACAGTGAACAATGCTAGGGAGA          | 29750 |
| gb:MT044258 | Organism: Severe | ACATTTTCACCGAGGCCACGCGGAGTACGATCGAGTGTACAGTGAACAATGCTAGGGAGA          | 29758 |
| gb:MT039890 | Organism: Severe | ACATTTTCACCGAGGCCACGCGGAGTACGATCGAGTGTACAGTGAACAATGCTAGGGAGA          | 29782 |
| gb:MN988713 | Organism: Severe | ACATTTTCACCGAGGCCACGCGGAGTACGATCGAGTGTACAGTGAACAATGCTAGGGAGA          | 29782 |
| gb:LC521925 | Organism: Severe | ACATTTTCACCGAGGCCACGCGGAGTACGATCGAGTGTACAGTGAACAATGCTAGGGAGA          | 29755 |
| gb:MT093571 | Organism: Severe | ACATTTTCACCGAGGCCACGCGGAGTACGATCGAGTGTACAGTGAACAATGCTAGGGAGA          | 29782 |
| gb:MT039887 | Organism: Severe | ACATTTTCACCGAGGCCACGCGGAGTACGATCGAGTGTACAGTGAACAATGCTAGGGAGA          | 29779 |
| gb:MT019530 | Organism: Severe | ACATTTTCACCGAGGCCACGCGGAGTACGATCGAGTGTACAGTGAACAATGCTAGGGAGA          | 29782 |
| gb:MT039888 | Organism: Severe | ACATTTTCACCGAGGCCACGCGGAGTACGATCGAGTGTACAGTGAACAATGCTAGGGAGA          | 29782 |
| gb:LC522972 | Organism: Severe | ACATTTTCACCGAGGCCACGCGGAGTACGATCGAGTGTACAGTGAACAATGCTAGGGAGA          | 29779 |
| gb:MT027063 | Organism: Severe | ACATTTTCACCGAGGCCACGCGGAGTACGATCGAGTGTACAGTGAACAATGCTAGGGAGA          | 29782 |
| gb:MT027062 | Organism: Severe | ACATTTTCACCGAGGCCACGCGGAGTACGATCGAGTGTACAGTGAACAATGCTAGGGAGA          | 29782 |
| gb:MT019529 | Organism: Severe | ACATTTTCACCGAGGCCACGCGGAGTACGATCGAGTGTACAGTGAACAATGCTAGGGAGA          | 29782 |
| gb:MN996529 | Organism: Severe | ACATTTTCACCGAGGCCACGCGGAGTACGATCGAGTGTACAGTGAACAATGCTAGGGAGA          | 29770 |
| gb:MN996531 | Organism: Severe | ACATTTTCACCGAGGCCACGCGGAGTACGATCGAGTGTACAGTGAACAATGCTAGGGAGA          | 29769 |
| gb:MT066176 | Organism: Severe | ACATTTTCACCGAGGCCACGCGGAGTACGATCGAGTGTACAGTGAACAATGCTAGGGAGA          | 29782 |
| gb:MT027064 | Organism: Severe | ACATTTTCACCGAGGCCACGCGGAGTACGATCGAGTGTACAGTGAACAATGCTAGGGAGA          | 29782 |
| gb:MN994468 | Organism: Severe | ACATTTTCACCGAGGCCACGCGGAGTACGATCGAGTGTACAGTGAACAATGCTAGGGAGA          | 29782 |
| gb:MT072688 | Organism: Severe | ACATTTTCACCGAGGCCACGCGGAGTACGATCGAGTGTACAGTGAACAATGCTAGGGAGA          | 29767 |
| gb:MN996527 | Organism: Severe | ACATTTTCACCGAGGCCACGCGGAGTACGATCGAGTGTACAGTGAACAATGCTAGGGAGA          | 29749 |
| gb:MT093631 | Organism: Severe | ACATTTTCACCGAGGCCACGCGGAGTACGATCGAGTGTACAGTGAACAATGCTAGGGAGA          | 29820 |
| gb:MT106053 | Organism: Severe | ACATTTTCACCGAGGCCACGCGGAGTACGATCGAGTGTACAGTGAACAATGCTAGGGAGA          | 29782 |
| gb:MT019533 | Organism: Severe | ACATTTTCACCGAGGCCACGCGGAGTACGATCGAGTGTACAGTGAACAATGCTAGGGAGA          | 29782 |
| gb:MT019531 | Organism: Severe | ACATTTTCACCGAGGCCACGCGGAGTACGATCGAGTGTACAGTGAACAATGCTAGGGAGA          | 29782 |
| gb:MN996528 | Organism: Severe | ACATTTTCACCGAGGCCACGCGGAGTACGATCGAGTGTACAGTGAACAATGCTAGGGAGA          | 29782 |
| gb:MN996530 | Organism: Severe | ACATTTTCACCGAGGCCACGCGGAGTACGATCGAGTGTACAGTGAACAATGCTAGGGAGA          | 29768 |
| gb:MN908947 | Organism: Severe | ACATTTTCACCGAGGCCACGCGGAGTACGATCGAGTGTACAGTGAACAATGCTAGGGAGA          | 29782 |
| gb:MT019532 | Organism: Severe | ACATTTTCACCGAGGCCACGCGGAGTACGATCGAGTGTACAGTGAACAATGCTAGGGAGA<br>***** | 29782 |

|             |                  |                                                           |       |
|-------------|------------------|-----------------------------------------------------------|-------|
| gb:MT020781 | Organism: Severe | GCTGCCTATATGGAAGAGCCCTAATGTGTAATAATTTTAGTAGTGCTATCCCCATGT | 29830 |
| gb:MT007544 | Organism: Severe | GCTGCCTATATGGAAGAGCCCTAATGTGTAATAATTTTAGTAGTGCTATCCCCATGT | 29832 |
| gb:MN994467 | Organism: Severe | GCTGCCTATATGGAAGAGCCCTAATGTGTAATAATTTTAGTAGTGCTATCCCCATGT | 29842 |
| gb:MT044257 | Organism: Severe | GCTGCCTATATGGAAGAGCCCTAATGTGTAATAATTTTAGTAGTGCTATCCCCATGT | 29842 |
| gb:MT106054 | Organism: Severe | GCTGCCTATATGGAAGAGCCCTAATGTGTAATAATTTTAGTAGTGCTATCCCCATGT | 29842 |
| gb:MT049951 | Organism: Severe | GCTGCCTATATGGAAGAGCCCTAATGTGTAATAATTTTAGTAGTGCTATCCCCATGT | 29842 |
| gb:MN975262 | Organism: Severe | GCTGCCTATATGGAAGAGCCCTAATGTGTAATAATTTTAGTAGTGCTATCCCCATGT | 29842 |
| gb:MT106052 | Organism: Severe | GCTGCCTATATGGAAGAGCCCTAATGTGTAATAATTTTAGTAGTGCTATCCCCATGT | 29842 |
| gb:LC522975 | Organism: Severe | GCTGCCTATATGGAAGAGCCCTAATGTGTAATAATTTTAGTAGTGCTATCCCCATGT | 29839 |
| gb:LC522973 | Organism: Severe | GCTGCCTATATGGAAGAGCCCTAATGTGTAATAATTTTAGTAGTGCTATCCCCATGT | 29839 |
| gb:LC522974 | Organism: Severe | GCTGCCTATATGGAAGAGCCCTAATGTGTAATAATTTTAGTAGTGCTATCCCCATGT | 29839 |
| gb:MN985325 | Organism: Severe | GCTGCCTATATGGAAGAGCCCTAATGTGTAATAATTTTAGTAGTGCTATCCCCATGT | 29842 |
| gb:MT020881 | Organism: Severe | GCTGCCTATATGGAAGAGCCCTAATGTGTAATAATTTTAGTAGTGCTATCCCCATGT | 29842 |
| gb:MT020880 | Organism: Severe | GCTGCCTATATGGAAGAGCCCTAATGTGTAATAATTTTAGTAGTGCTATCCCCATGT | 29842 |

|             |                 |                                                            |       |
|-------------|-----------------|------------------------------------------------------------|-------|
| gb:MT066175 | Organism:Severe | GCTGCCTATATGGAAGAGCCCTAATGTGTAATAAATTTTAGTAGTGCTATCCCCATGT | 29842 |
| gb:MN997409 | Organism:Severe | GCTGCCTATATGGAAGAGCCCTAATGTGTAATAAATTTTAGTAGTGCTATCCCCATGT | 29842 |
| gb:MN938384 | Organism:Severe | GCTGCCTATATGGAAGAGCCCTAATGTGTAATAAATTTTAGTAGTGCTATCCCCATGT | 29810 |
| gb:MT044258 | Organism:Severe | GCTGCCTATATGGAAGAGCCCTAATGTGTAATAAATTTTAGTAGTGCTATCCCCATGT | 29818 |
| gb:MT039890 | Organism:Severe | GCTGCCTATATGGAAGAGCCCTAATGTGTAATAAATTTTAGTAGTGCTATCCCCATGT | 29842 |
| gb:MN988713 | Organism:Severe | GCTGCCTATATGGAAGAGCCCTAATGTGTAATAAATTTTAGTAGTGCTATCCCCATGT | 29842 |
| gb:LC521925 | Organism:Severe | GCTGCCTATATGGAAGAGCCCTAATGTGTAATAAATTTTAGTAGTGCTATCCCCATGT | 29815 |
| gb:MT093571 | Organism:Severe | GCTGCCTATATGGAAGAGCCCTAATGTGTAATAAATTTTAGTAGTGCTATCCCCATGT | 29842 |
| gb:MT039887 | Organism:Severe | GCTGCCTATATGGAAGAGCCCTAATGTGTAATAAATTTTAGTAGTGCTATCCCCATGT | 29839 |
| gb:MT019530 | Organism:Severe | GCTGCCTATATGGAAGAGCCCTAATGTGTAATAAATTTTAGTAGTGCTATCCCCATGT | 29842 |
| gb:MT039888 | Organism:Severe | GCTGCCTATATGGAAGAGCCCTAATGTGTAATAAATTTTAGTAGTGCTATCCCCATGT | 29842 |
| gb:LC522972 | Organism:Severe | GCTGCCTATATGGAAGAGCCCTAATGTGTAATAAATTTTAGTAGTGCTATCCCCATGT | 29839 |
| gb:MT027063 | Organism:Severe | GCTGCCTATATGGAAGAGCCCTAATGTGTAATAAATTTTAGTAGTGCTATCCCCATGT | 29842 |
| gb:MT027062 | Organism:Severe | GCTGCCTATATGGAAGAGCCCTAATGTGTAATAAATTTTAGTAGTGCTATCCCCATGT | 29842 |
| gb:MT019529 | Organism:Severe | GCTGCCTATATGGAAGAGCCCTAATGTGTAATAAATTTTAGTAGTGCTATCCCCATGT | 29842 |
| gb:MN996529 | Organism:Severe | GCTGCCTATATGGAAGAGCCCTAATGTGTAATAAATTTTAGTAGTGCTATCCCCATGT | 29830 |
| gb:MN996531 | Organism:Severe | GCTGCCTATATGGAAGAGCCCTAATGTGTAATAAATTTTAGTAGTGCTATCCCCATGT | 29829 |
| gb:MT066176 | Organism:Severe | GCTGCCTATATGGAAGAGCCCTAATGTGTAATAAATTTTAGTAGTGCTATCCCCATGT | 29842 |
| gb:MT027064 | Organism:Severe | GCTGCCTATATGGAAGAGCCCTAATGTGTAATAAATTTTAGTAGTGCTATCCCCATGT | 29842 |
| gb:MN994468 | Organism:Severe | GCTGCCTATATGGAAGAGCCCTAATGTGTAATAAATTTTAGTAGTGCTATCCCCATGT | 29842 |
| gb:MT072688 | Organism:Severe | GCTGCCTATATGGAAGAGCCCTAATGTGTAATAAATTTTAGT-----            | 29811 |
| gb:MN996527 | Organism:Severe | GCTGCCTATATGGAAGAGCCCTAATGTGTAATAAATTTTAGTAGTGCTATCCCCATGT | 29809 |
| gb:MT093631 | Organism:Severe | GCTGCCTATATGGAAGAGCCCTAATGTGTAATAAATTTTAGTAGTGCTATCCCCATGT | 29880 |
| gb:MT106053 | Organism:Severe | GCTGCCTATATGGAAGAGCCCTAATGTGTAATAAATTTTAGTAGTGCTATCCCCATGT | 29842 |
| gb:MT019533 | Organism:Severe | GCTGCCTATATGGAAGAGCCCTAATGTGTAATAAATTTTAGTAGTGCTATCCCCATGT | 29842 |
| gb:MT019531 | Organism:Severe | GCTGCCTATATGGAAGAGCCCTAATGTGTAATAAATTTTAGTAGTGCTATCCCCATGT | 29842 |
| gb:MN996528 | Organism:Severe | GCTGCCTATATGGAAGAGCCCTAATGTGTAATAAATTTTAGTAGTGCTATCCCCATGT | 29842 |
| gb:MN996530 | Organism:Severe | GCTGCCTATATGGAAGAGCCCTAATGTGTAATAAATTTTAGTAGTGCTATCCCCATGT | 29828 |
| gb:MN908947 | Organism:Severe | GCTGCCTATATGGAAGAGCCCTAATGTGTAATAAATTTTAGTAGTGCTATCCCCATGT | 29842 |
| gb:MT019532 | Organism:Severe | GCTGCCTATATGGAAGAGCCCTAATGTGTAATAAATTTTAGTAGTGCTATCCCCATGT | 29842 |

\*\*\*\*\*

|             |                 |                                                             |       |
|-------------|-----------------|-------------------------------------------------------------|-------|
| gb:MT020781 | Organism:Severe | GATTTTAATAGCTTCTT-----                                      | 29847 |
| gb:MT007544 | Organism:Severe | GATTTTAATAGCTTCTTAGGAGAATGACAAAAAAAAAAAAAAAAAAAAAAAAAAAA    | 29892 |
| gb:MN994467 | Organism:Severe | GATTTTAATAGCTTCTTAGGAGAATGACAAAAAAAAAAAA-----               | 29882 |
| gb:MT044257 | Organism:Severe | GATTTTAATAGCTTCTTAGGAGAATGACAAAAAAAAAAAA-----               | 29882 |
| gb:MT106054 | Organism:Severe | GATTTTAATAGCTTCTTAGGAGAATGACAAAAAAAAAAAA-----               | 29882 |
| gb:MT049951 | Organism:Severe | GATTTTAATAGCTTCTTAGGAGAATGACAAAAAAAAAAAAAAAAAAAAAAAAAAAA    | 29902 |
| gb:MN975262 | Organism:Severe | GATTTTAATAGCTTCTTAGGAGAATGACAAAAAAAAAAAAAAAAAAAA-----       | 29891 |
| gb:MT106052 | Organism:Severe | GATTTTAATAGCTTCTTAGGAGAATGACAAAAAAAAAAAA-----               | 29882 |
| gb:LC522975 | Organism:Severe | GATTTTAATAGCTTCTTAGGAGAATGACAAAAAAAAAAAA-----               | 29878 |
| gb:LC522973 | Organism:Severe | GATTTTAATAGCTTCTTAGGAGAATGACAAAAAAAAAAAA-----               | 29878 |
| gb:LC522974 | Organism:Severe | GATTTTAATAGCTTCTTAGGAGAATGACAAAAAAAAAAAA-----               | 29878 |
| gb:MN985325 | Organism:Severe | GATTTTAATAGCTTCTTAGGAGAATGACAAAAAAAAAAAA-----               | 29882 |
| gb:MT020881 | Organism:Severe | GATTTTAATAGCTTCTTAGGAGAATGACAAAAAAAAAAAA-----               | 29882 |
| gb:MT020880 | Organism:Severe | GATTTTAATAGCTTCTTAGGAGAATGACAAAAAAAAAAAA-----               | 29882 |
| gb:MT066175 | Organism:Severe | GATTTTAATAGCTTCTTAGGAGAATGAC-----                           | 29870 |
| gb:MN997409 | Organism:Severe | GATTTTAATAGCTTCTTAGGAGAATGACAAAAAAAAAAAA-----               | 29882 |
| gb:MN938384 | Organism:Severe | GATTTTAATAGCTTCTTAGGAGAATGAC-----                           | 29838 |
| gb:MT044258 | Organism:Severe | GATTTTAATAGCTTCTTAGGAGAATGACAAAAAAAAAAAA-----               | 29858 |
| gb:MT039890 | Organism:Severe | GATTTTAATAGCTTCTTAGGAGAATGACAAAAAAAAAAAAAAAAAAAAAAAAAAAA    | 29902 |
| gb:MN988713 | Organism:Severe | GATTTTAATAGCTTCTTAGGAGAATGACAAAAAAAAAAAA-----               | 29882 |
| gb:LC521925 | Organism:Severe | GATTTTAATAGCTTCTTAGGAGAATGACAAAA-----                       | 29848 |
| gb:MT093571 | Organism:Severe | GATTTTAATAGCTTCTTAGGAGAATGACAAAAAAAAAAAAAAAAAAAA-----       | 29886 |
| gb:MT039887 | Organism:Severe | GATTTTAATAGCTTCTTAGGAGAATGACAAAAAAAAAAAA-----               | 29879 |
| gb:MT019530 | Organism:Severe | GATTTTAATAGCTTCTTAGGAGAATGACAAAAAAAAAAAAAAAAAAAA-----       | 29889 |
| gb:MT039888 | Organism:Severe | GATTTTAATAGCTTCTTAGGAGAATGACAAAAAAAAAAAA-----               | 29882 |
| gb:LC522972 | Organism:Severe | GATTTTAATAGCTTCTTAGGAGAATGACAAAAAAAAAAAA-----               | 29878 |
| gb:MT027063 | Organism:Severe | GATTTTAATAGCTTCTTAGGAGAATGACAAAAAAAAAAAA-----               | 29882 |
| gb:MT027062 | Organism:Severe | GATTTTAATAGCTTCTTAGGAGAATGACAAAAAAAAAAAA-----               | 29882 |
| gb:MT019529 | Organism:Severe | GATTTTAATAGCTTCTTAGGAGAATGACAAAAAAAAAAAAAAAAAAAAAAAAAAAA--- | 29899 |
| gb:MN996529 | Organism:Severe | GATTTTAATAGCTTCTTAGGAG-----                                 | 29852 |
| gb:MN996531 | Organism:Severe | GATTTTAATAGCTTCTTAGGAGAATGAC-----                           | 29857 |
| gb:MT066176 | Organism:Severe | GATTTTAATAGCTTCTTAGGAGAATGAC-----                           | 29870 |
| gb:MT027064 | Organism:Severe | GATTTTAATAGCTTCTTAGGAGAATGACAAAAAAAAAAAA-----               | 29882 |

|             |                 |                                                                |       |
|-------------|-----------------|----------------------------------------------------------------|-------|
| gb:MN994468 | Organism:Severe | GATTTTAATAGCTTCTTAGGAGAATGACAAAAAAAAAAAAA-----                 | 29883 |
| gb:MT072688 | Organism:Severe | -----                                                          | 29811 |
| gb:MN996527 | Organism:Severe | GATTTTAATAGCTTCT-----                                          | 29825 |
| gb:MT093631 | Organism:Severe | GATTTTAATAGCTTCTTAGGAGAATGACAAA-----                           | 29911 |
| gb:MT106053 | Organism:Severe | GATTTTAATAGCTTCTTAGGAGAATGACAAAAAAAAAAAAA-----                 | 29882 |
| gb:MT019533 | Organism:Severe | GATTTTAATAGCTTCTTAGGAGAATGACAAAAAAAAAAAAA-----                 | 29883 |
| gb:MT019531 | Organism:Severe | GATTTTAATAGCTTCTTAGGAGAATGACAAAAAAAAAAAAAAAAAAAAAAAAAAAAA---   | 29899 |
| gb:MN996528 | Organism:Severe | GATTTTAATAGCTTCTTAGGAGAATGACAAAAAAAAAAAAAAAAAAAAAAAAAAAAA----- | 29891 |
| gb:MN996530 | Organism:Severe | GATTTTAATAGCTTCTTAGGAGAATG-----                                | 29854 |
| gb:MN908947 | Organism:Severe | GATTTTAATAGCTTCTTAGGAGAATGACAAAAAAAAAAAAAAAAAAAAAAAAAAAAA      | 29902 |
| gb:MT019532 | Organism:Severe | GATTTTAATAGCTTCTTAGGAGAATGACAAAAAAAAAAAAAAAAAAAAAAAAAAAAA----- | 29890 |

|             |                 |   |       |
|-------------|-----------------|---|-------|
| gb:MT020781 | Organism:Severe | - | 29847 |
| gb:MT007544 | Organism:Severe | A | 29893 |
| gb:MN994467 | Organism:Severe | - | 29882 |
| gb:MT044257 | Organism:Severe | - | 29882 |
| gb:MT106054 | Organism:Severe | - | 29882 |
| gb:MT049951 | Organism:Severe | A | 29903 |
| gb:MN975262 | Organism:Severe | - | 29891 |
| gb:MT106052 | Organism:Severe | - | 29882 |
| gb:LC522975 | Organism:Severe | - | 29878 |
| gb:LC522973 | Organism:Severe | - | 29878 |
| gb:LC522974 | Organism:Severe | - | 29878 |
| gb:MN985325 | Organism:Severe | - | 29882 |
| gb:MT020881 | Organism:Severe | - | 29882 |
| gb:MT020880 | Organism:Severe | - | 29882 |
| gb:MT066175 | Organism:Severe | - | 29870 |
| gb:MN997409 | Organism:Severe | - | 29882 |
| gb:MN938384 | Organism:Severe | - | 29838 |
| gb:MT044258 | Organism:Severe | - | 29858 |
| gb:MT039890 | Organism:Severe | A | 29903 |
| gb:MN988713 | Organism:Severe | - | 29882 |
| gb:LC521925 | Organism:Severe | - | 29848 |
| gb:MT093571 | Organism:Severe | - | 29886 |
| gb:MT039887 | Organism:Severe | - | 29879 |
| gb:MT019530 | Organism:Severe | - | 29889 |
| gb:MT039888 | Organism:Severe | - | 29882 |
| gb:LC522972 | Organism:Severe | - | 29878 |
| gb:MT027063 | Organism:Severe | - | 29882 |
| gb:MT027062 | Organism:Severe | - | 29882 |
| gb:MT019529 | Organism:Severe | - | 29899 |
| gb:MN996529 | Organism:Severe | - | 29852 |
| gb:MN996531 | Organism:Severe | - | 29857 |
| gb:MT066176 | Organism:Severe | - | 29870 |
| gb:MT027064 | Organism:Severe | - | 29882 |
| gb:MN994468 | Organism:Severe | - | 29883 |
| gb:MT072688 | Organism:Severe | - | 29811 |
| gb:MN996527 | Organism:Severe | - | 29825 |
| gb:MT093631 | Organism:Severe | - | 29911 |
| gb:MT106053 | Organism:Severe | - | 29882 |
| gb:MT019533 | Organism:Severe | - | 29883 |
| gb:MT019531 | Organism:Severe | - | 29899 |
| gb:MN996528 | Organism:Severe | - | 29891 |
| gb:MN996530 | Organism:Severe | - | 29854 |
| gb:MN908947 | Organism:Severe | A | 29903 |
| gb:MT019532 | Organism:Severe | - | 29890 |
