# Supplementary material for: Immunoinformatic identification of B cell and T cell epitopes in the SARS-CoV-2 proteome
Source: PubMed Central journal article supplement (PMC7447814; doi:10.1038/s41598-020-70864-8), 2020-08-25
Supplement: 41598_2020_70864_MOESM2_ESM.pdf [file 41598_2020_70864_MOESM2_ESM.pdf]

## **Immunoinformatic identification of B cell and T cell epitopes in the SARS-CoV-2 proteome**

Stephen N. Crooke, Inna G. Ovsyannikova, Richard B. Kennedy, Gregory A. Poland\*

Mayo Clinic Vaccine Research Group, Mayo Clinic, Rochester, MN USA

### Correspondence:

Gregory A. Poland, M.D., Director – Vaccine Research Group, Mayo Clinic, Guggenheim Building  
611C, 200 First Street SW, Rochester, MN 55905 USA

Phone: (507) 284-4968; E-mail: [poland.gregory@mayo.edu](mailto:poland.gregory@mayo.edu)

Supplementary Information for

Immunoinformatic identification of B cell and T cell epitopes in the SARS-CoV-2 proteome

Stephen N. Crooke, Inna G. Ovsyannikova, Richard B. Kennedy, Gregory A. Poland

Corresponding author: Gregory Poland, M.D.

Email: poland.gregory@mayo.edu

**This PDF file includes:**

Figures S1 to S2

Tables S1 to S2

**Fig. S1 (separate file).** Sequence alignments.

**Fig. S2.** NetCTL prediction scores by individual HLA class I supertype.

**E glycoprotein**

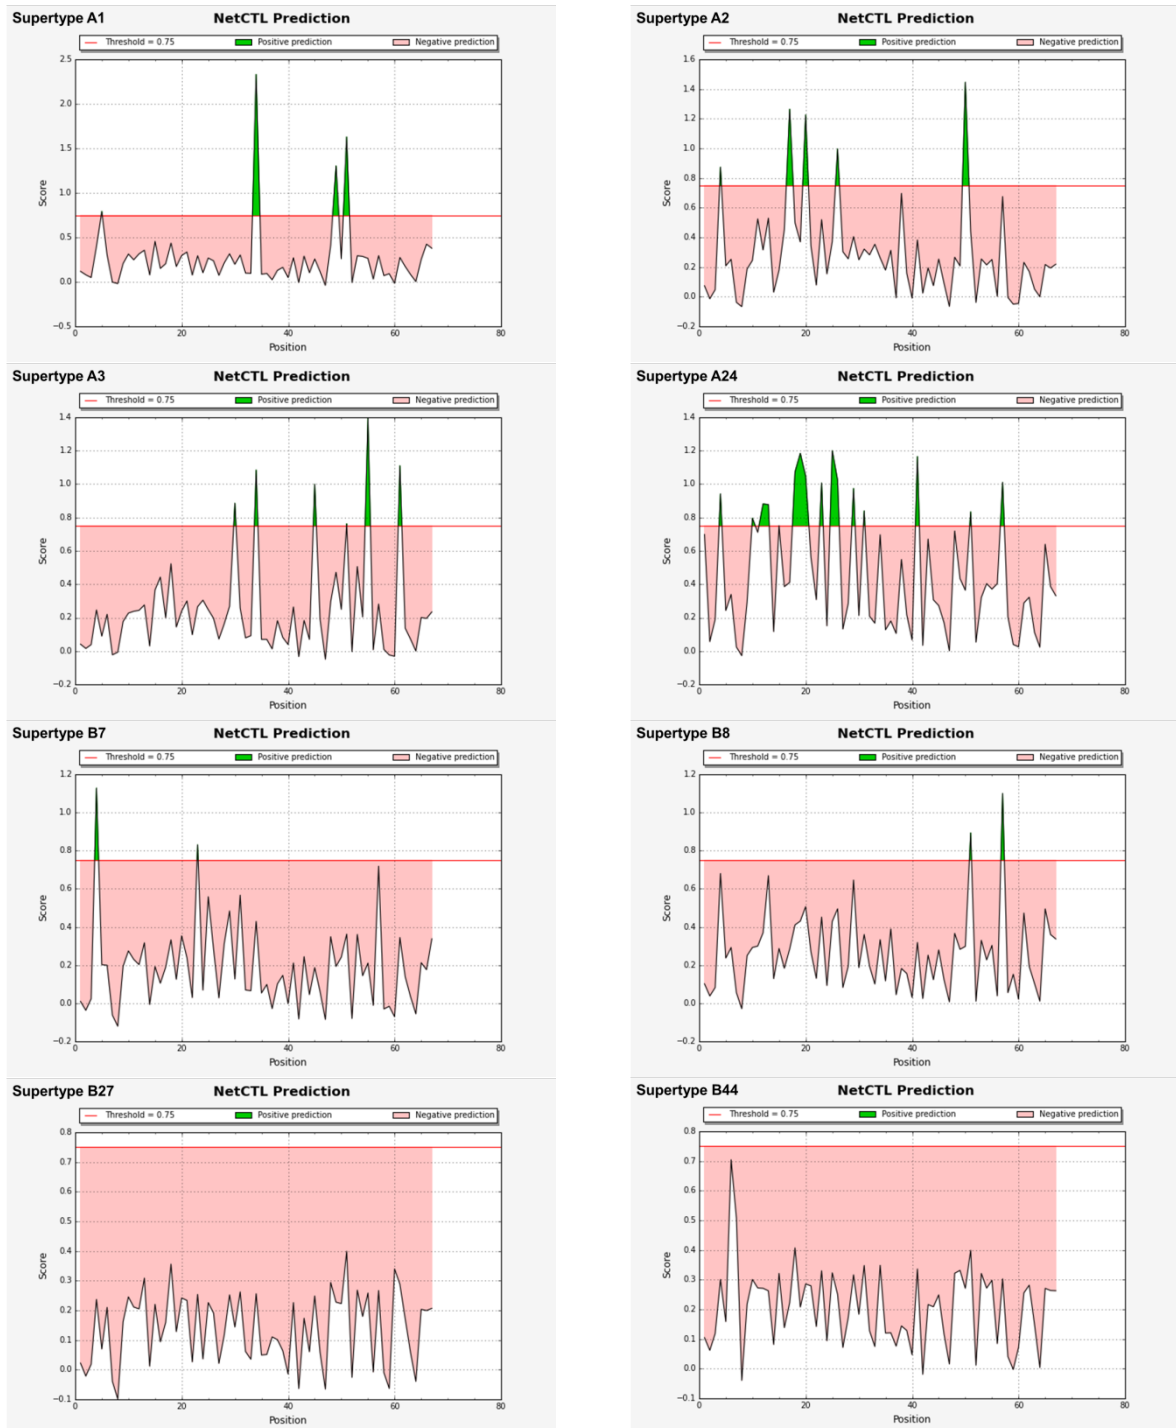



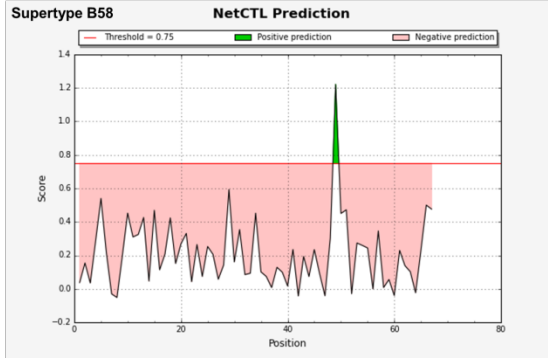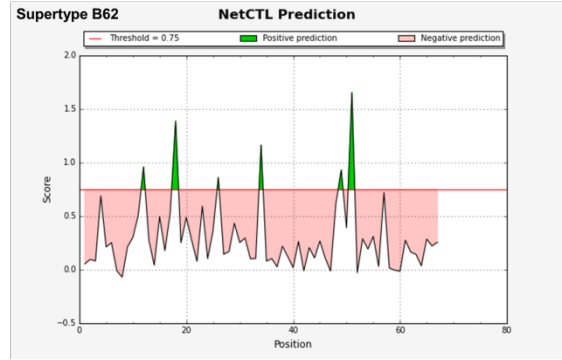

## M glycoprotein

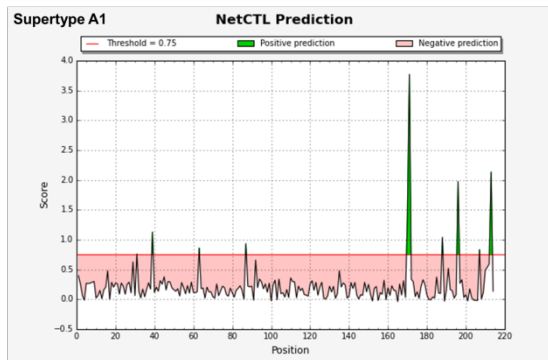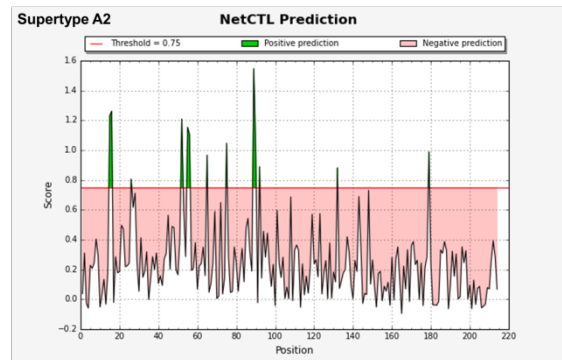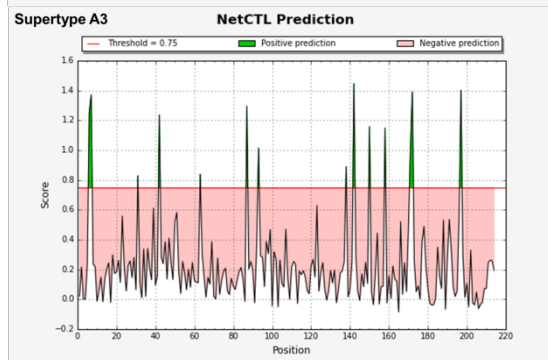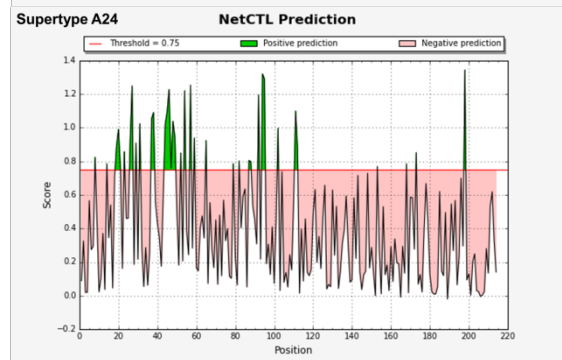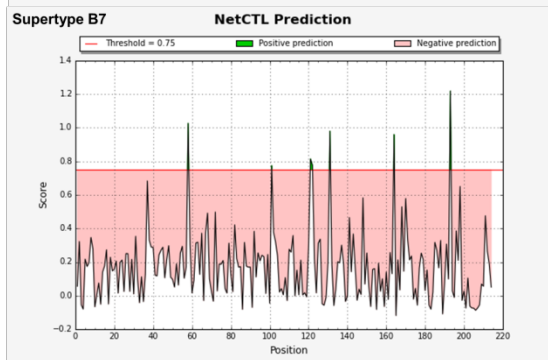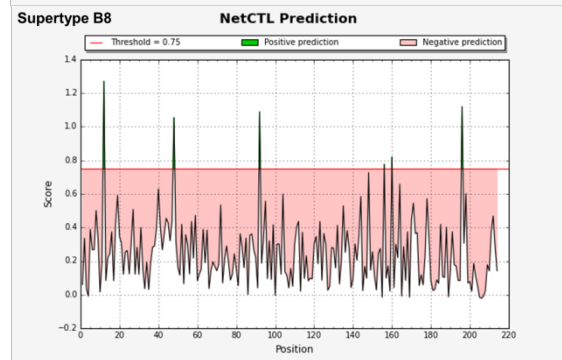

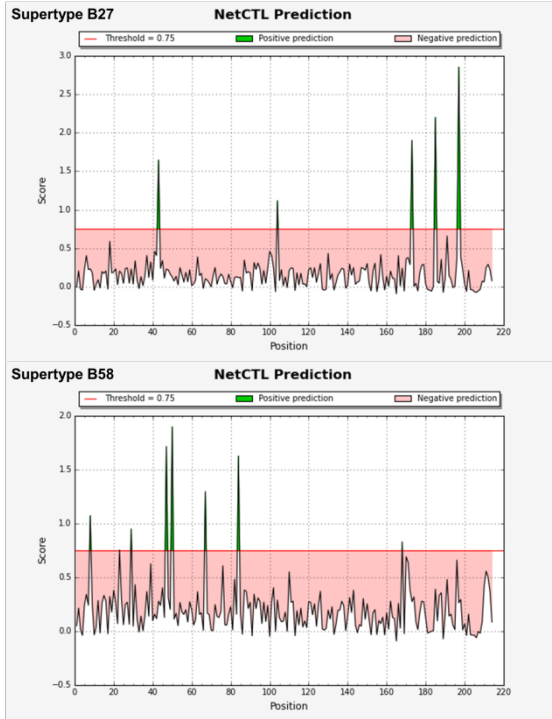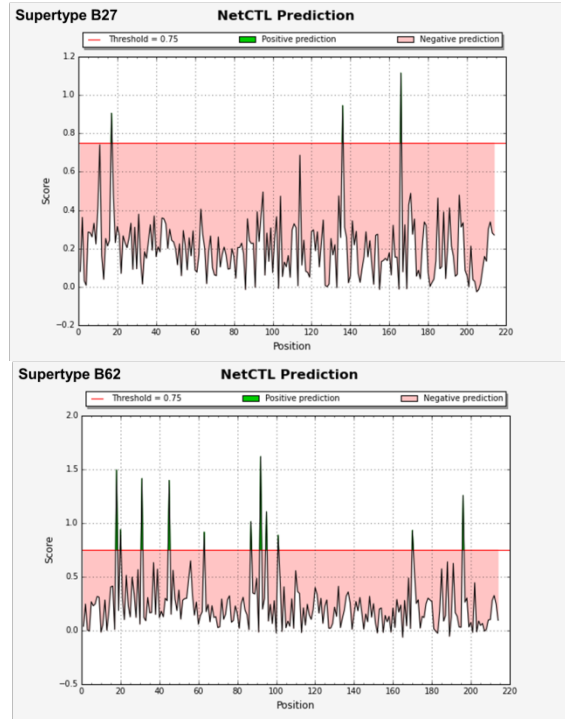

## N phosphoprotein

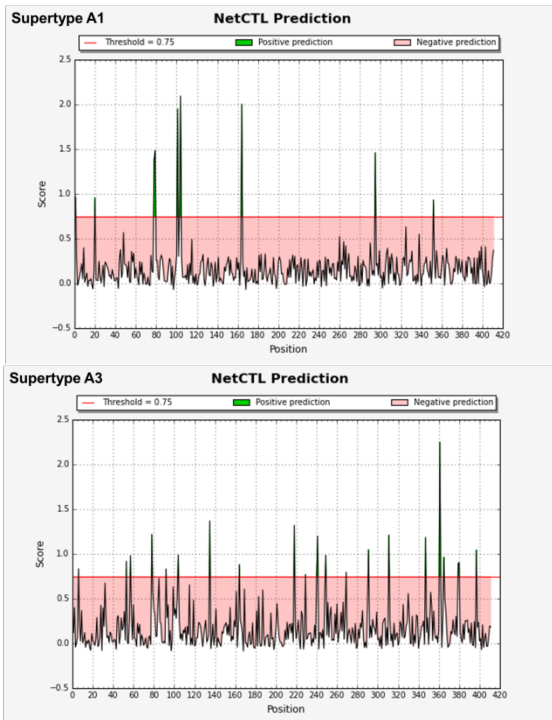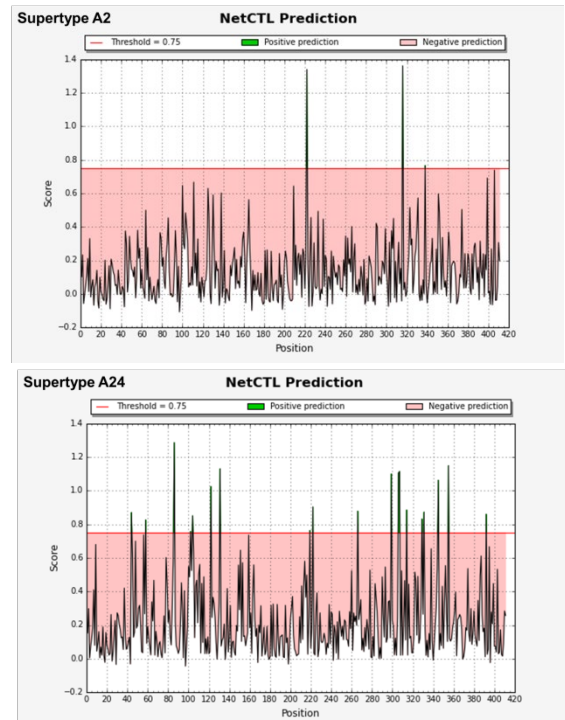

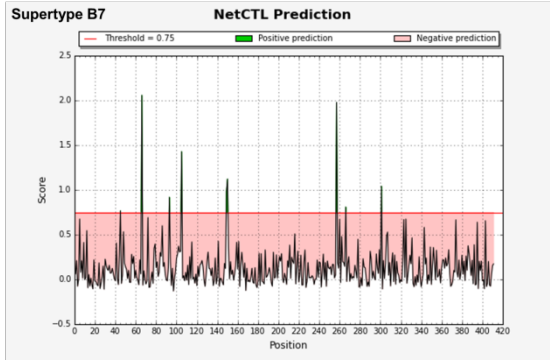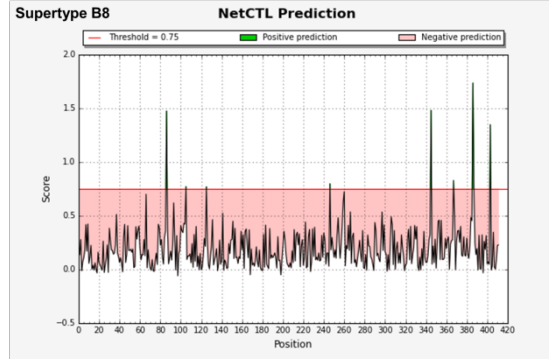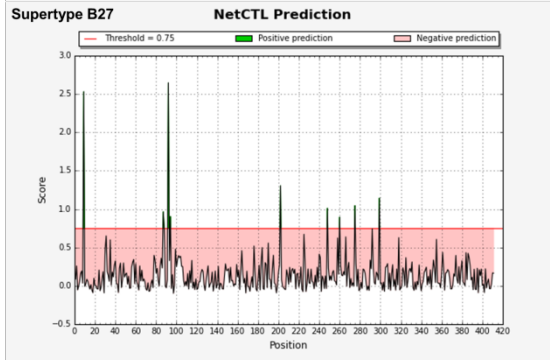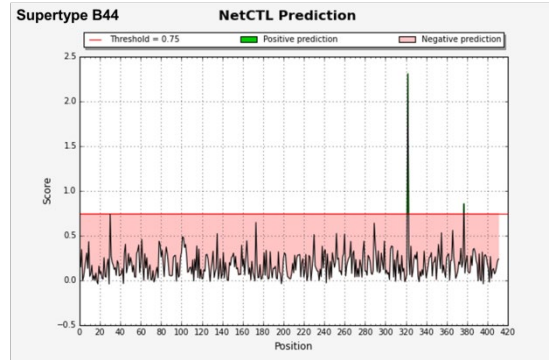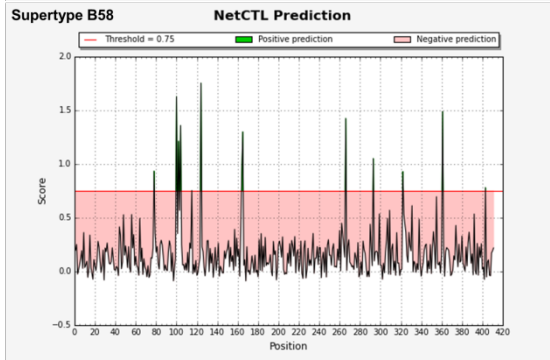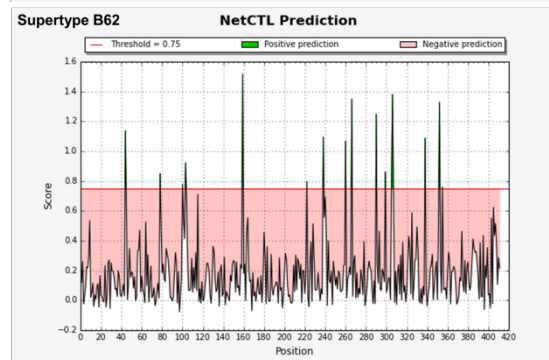

## ORF3a protein

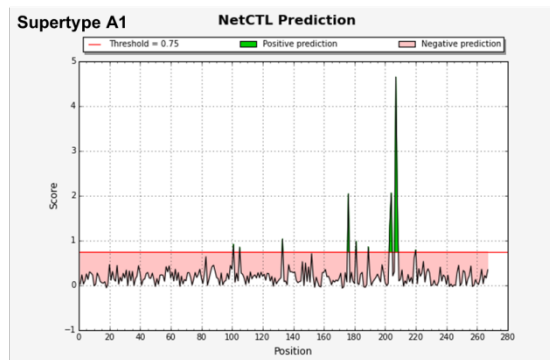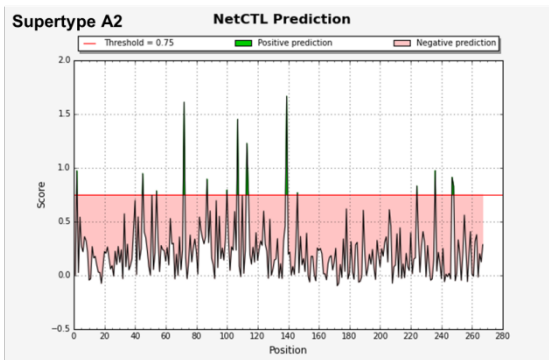

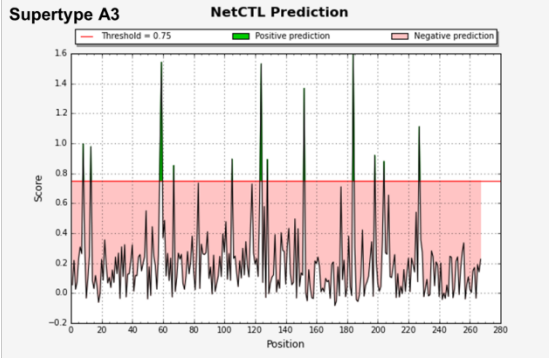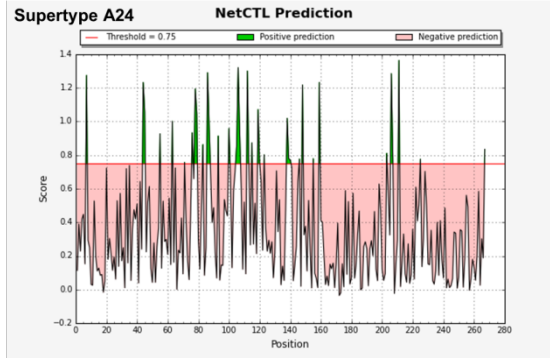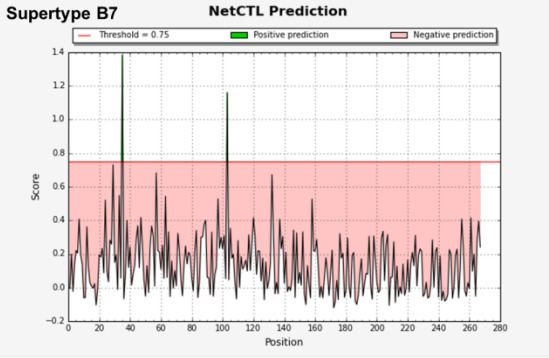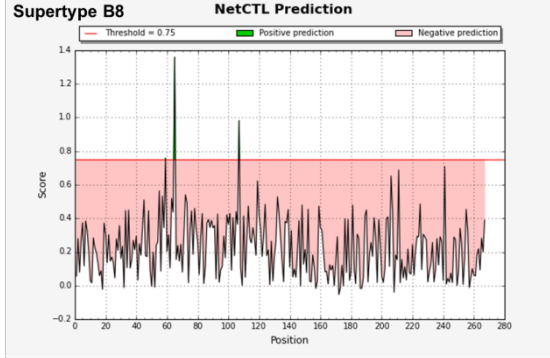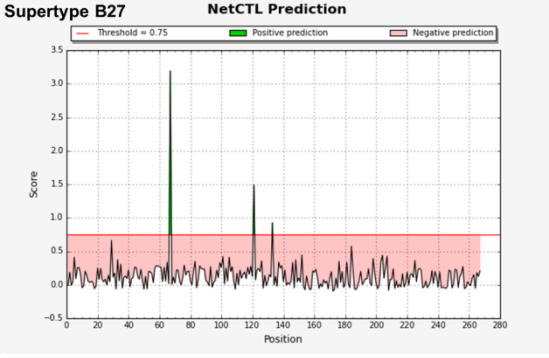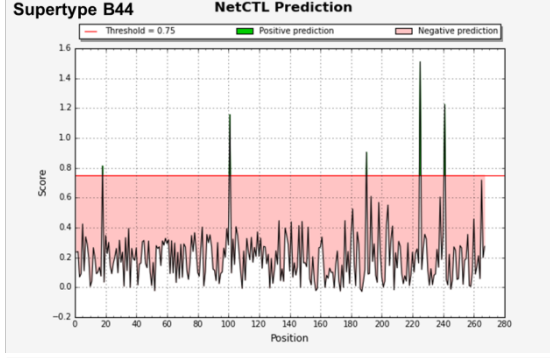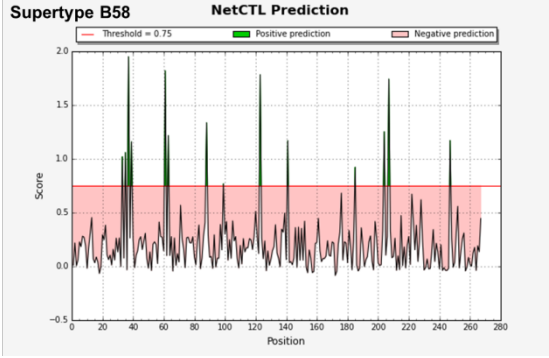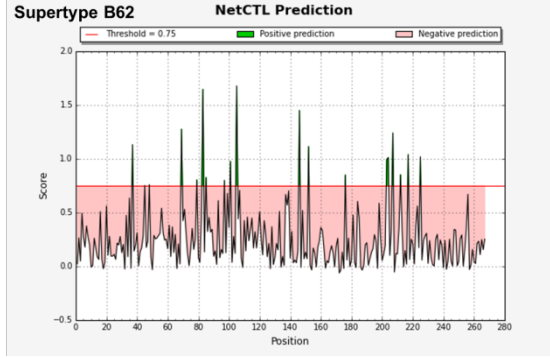

# ORF6 protein

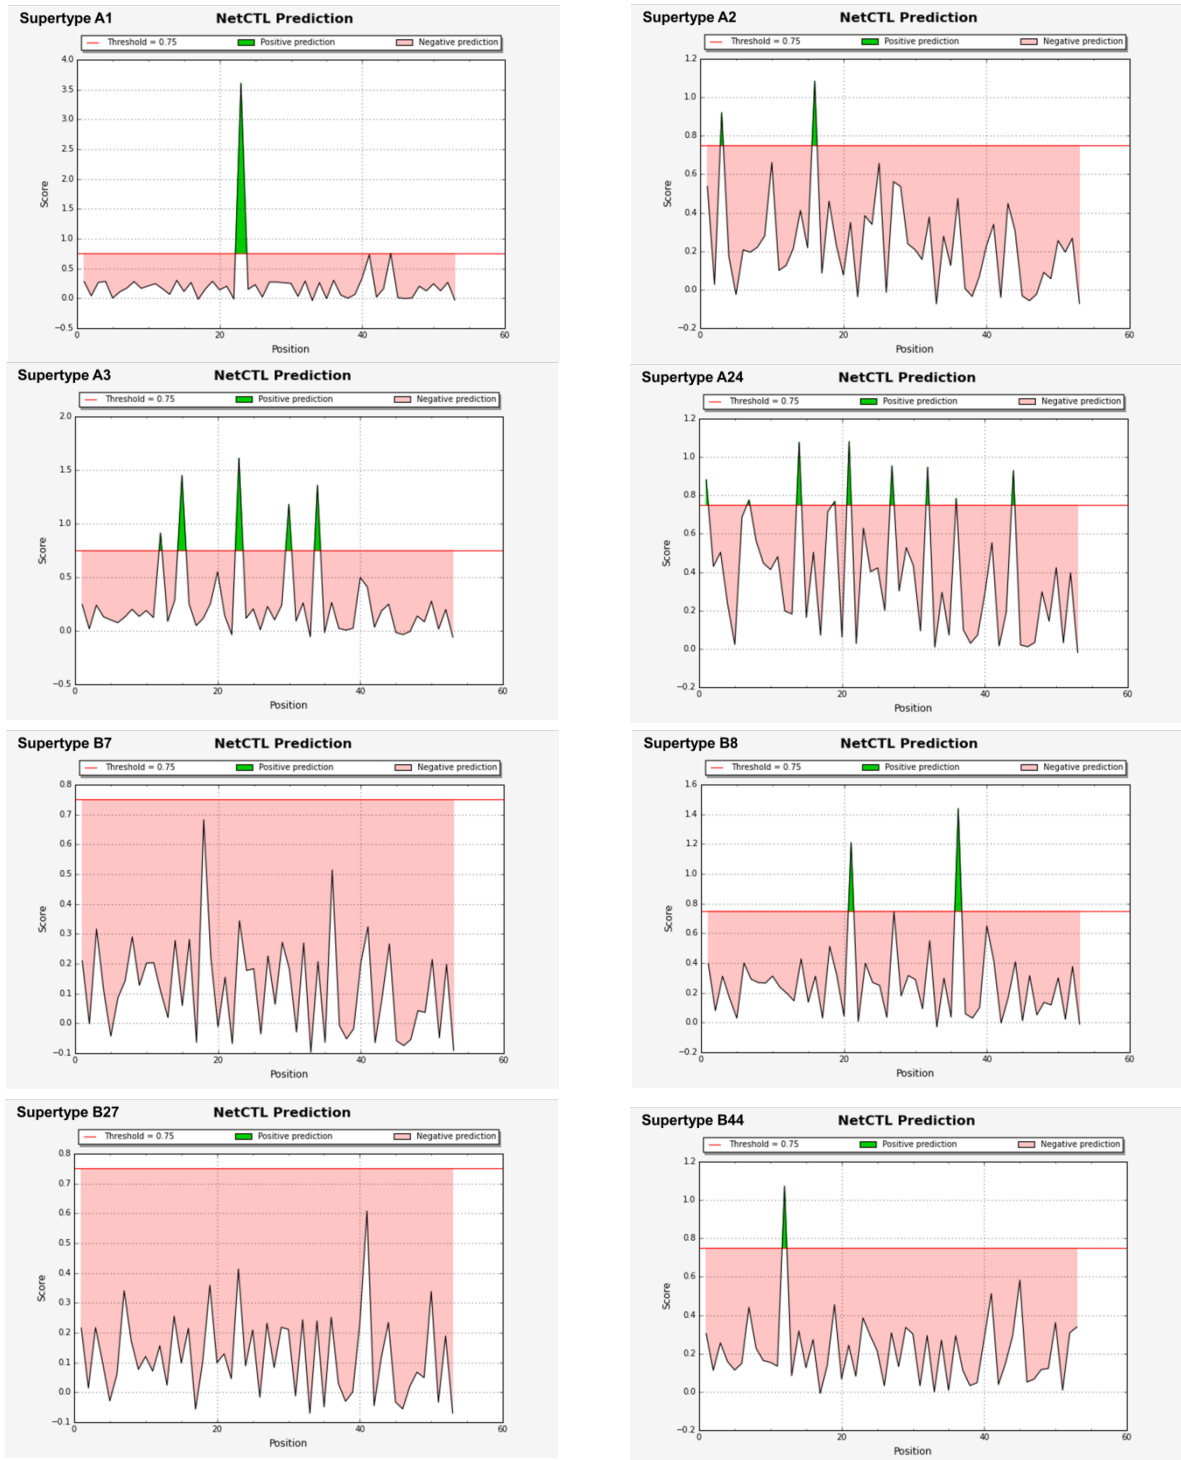



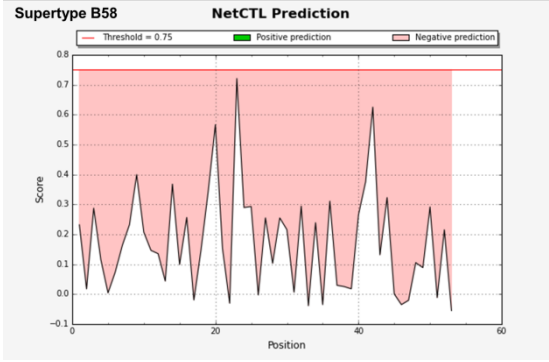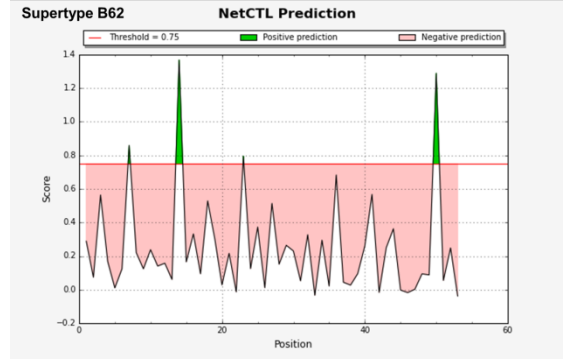

## ORF7 protein

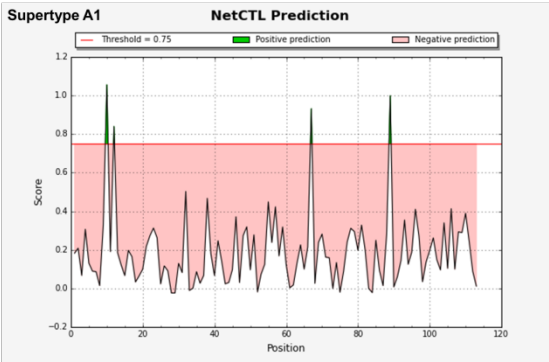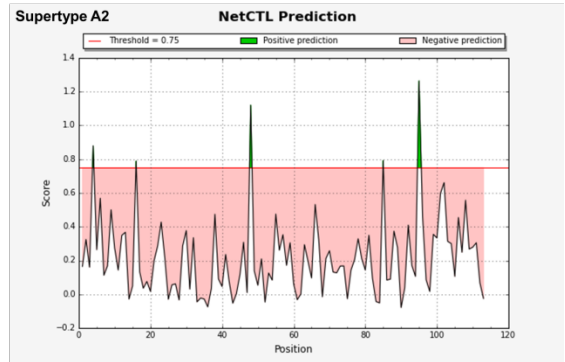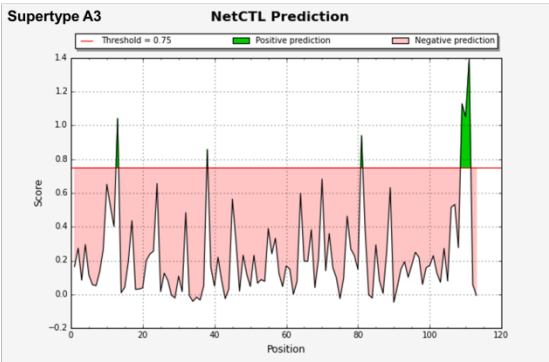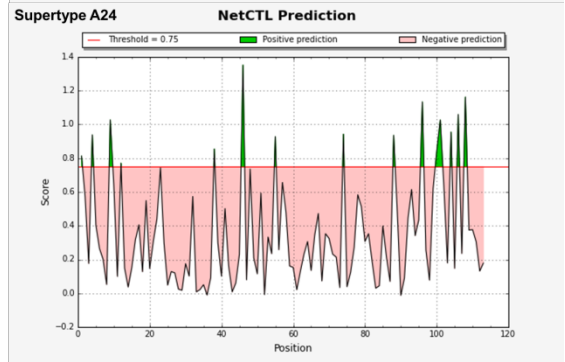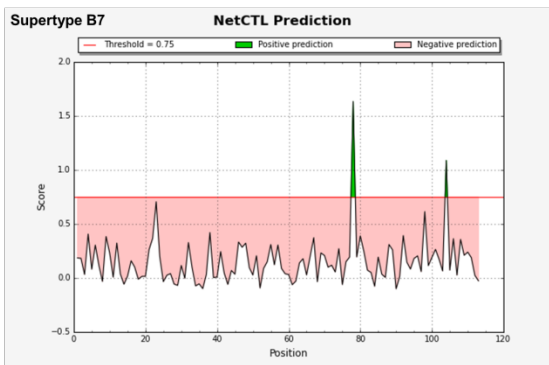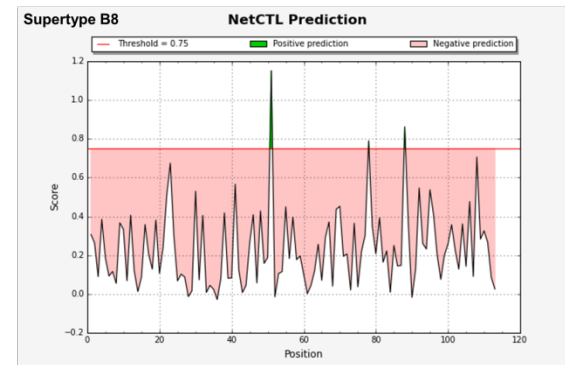

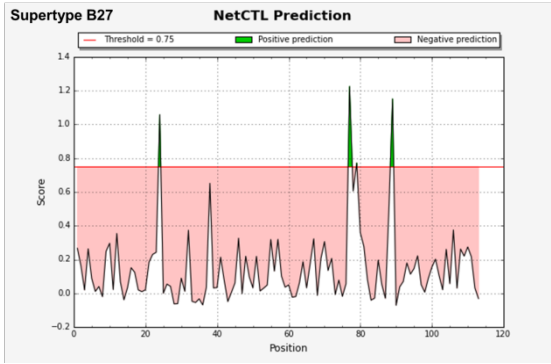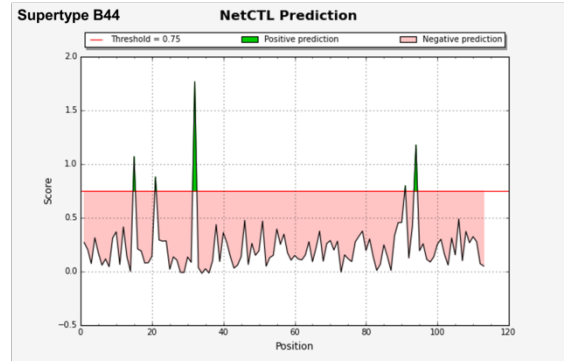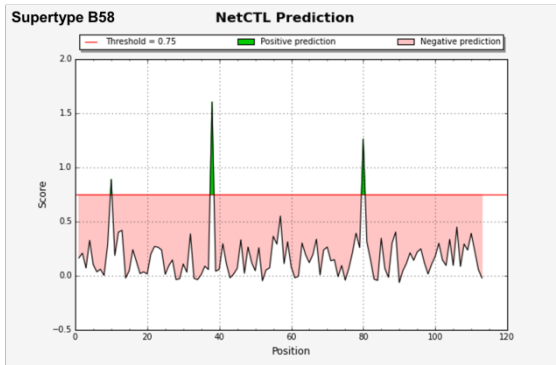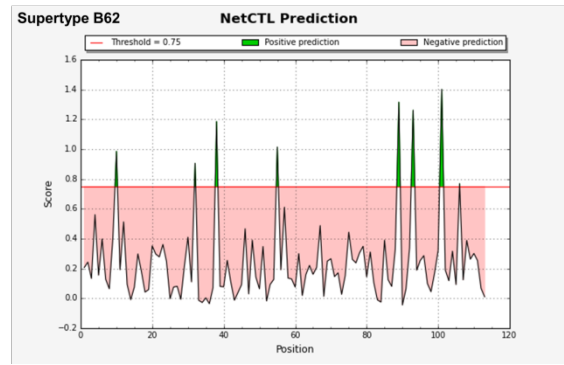

## ORF8 protein

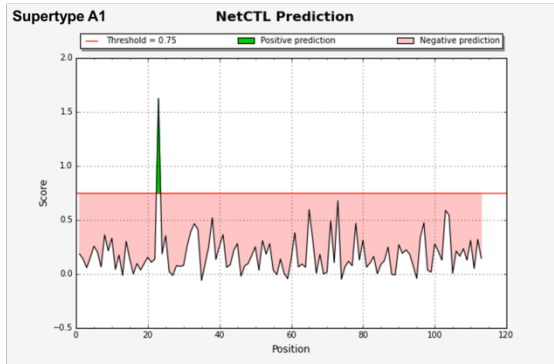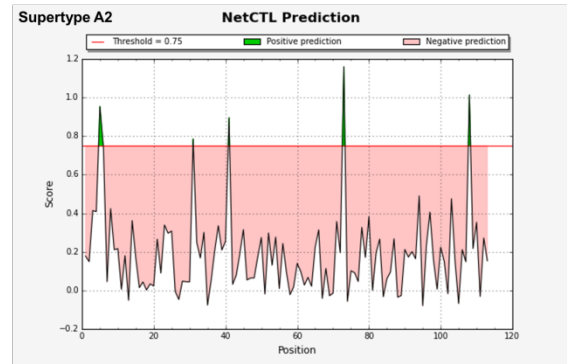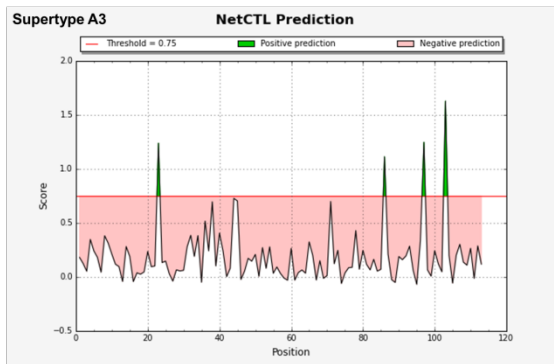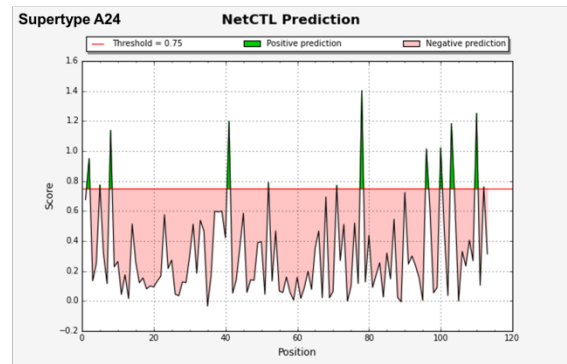

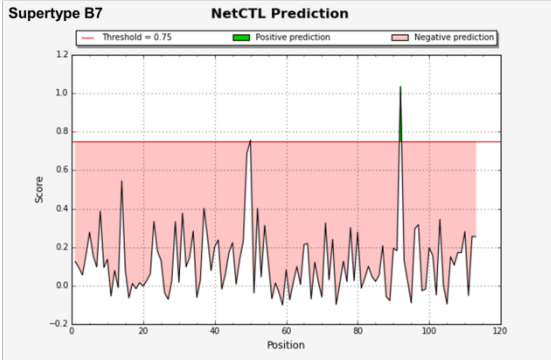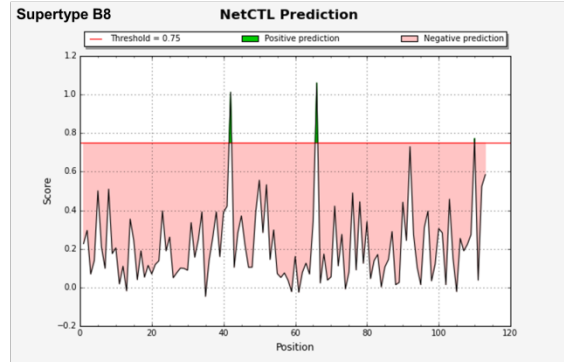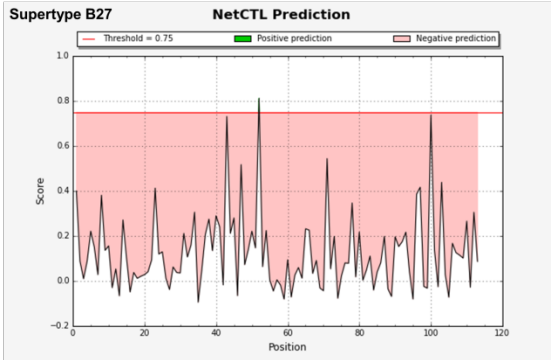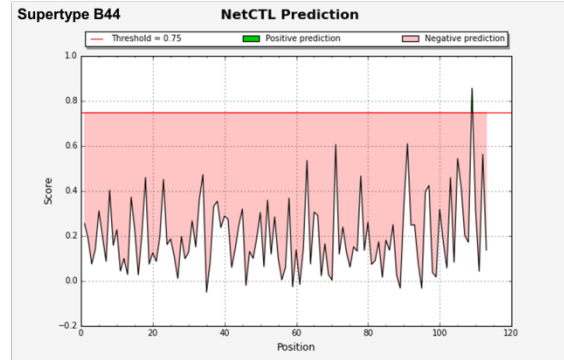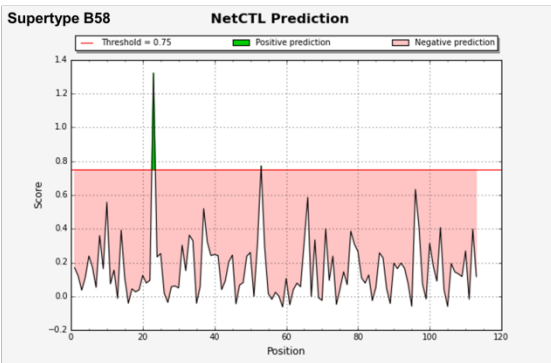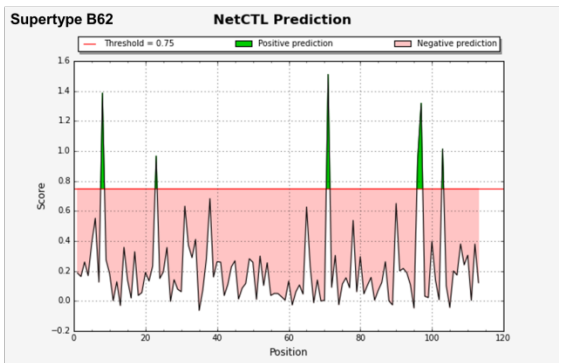

**ORF10**

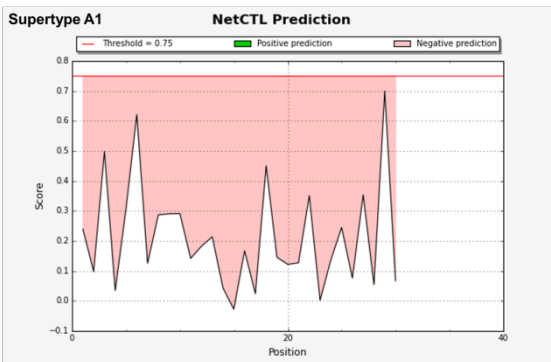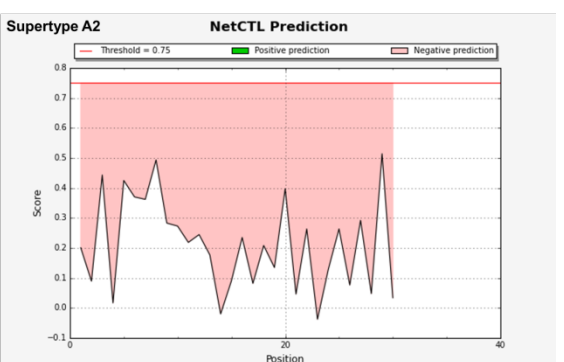



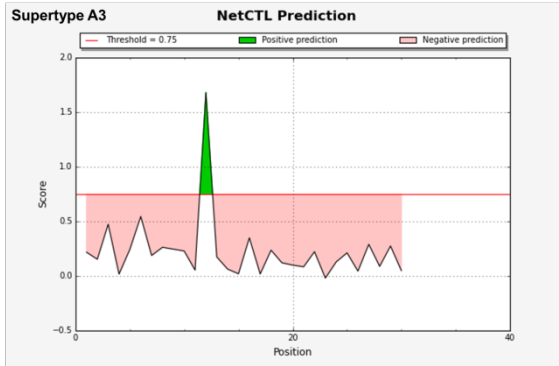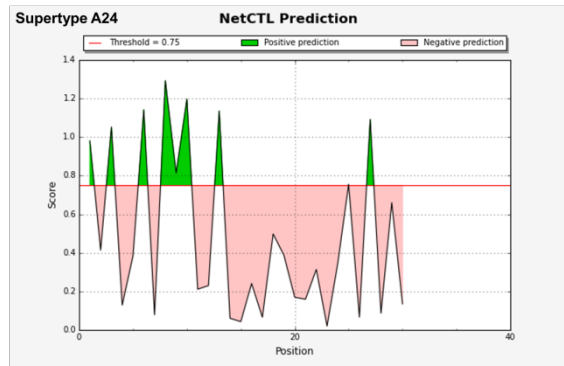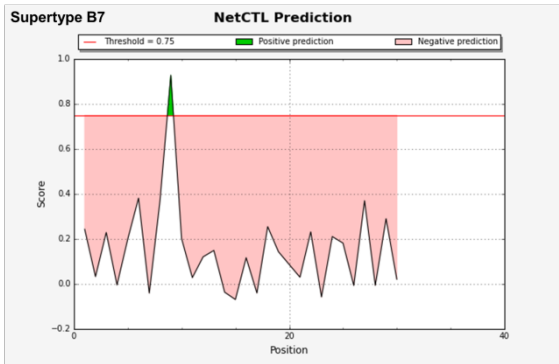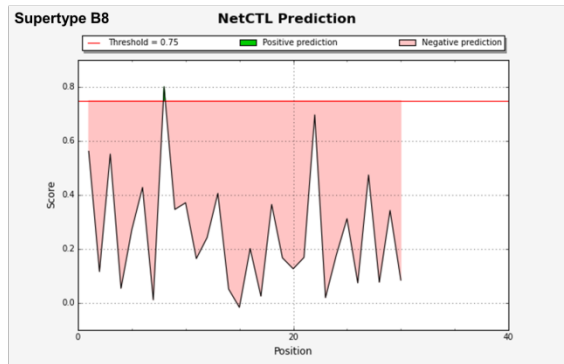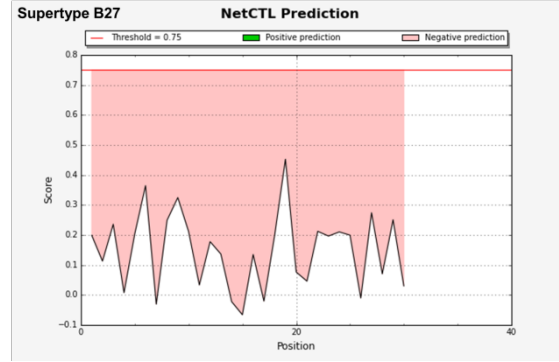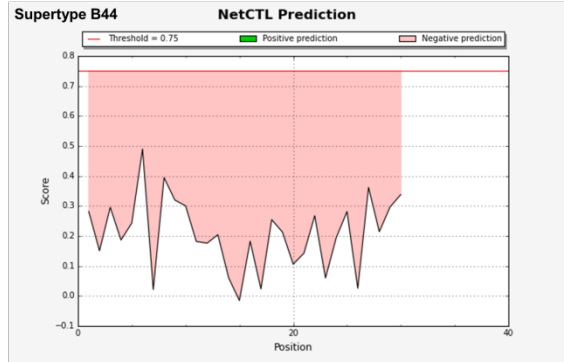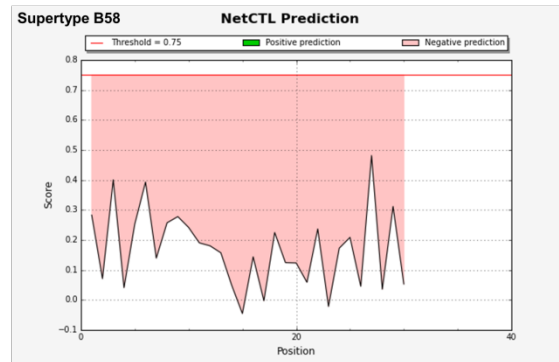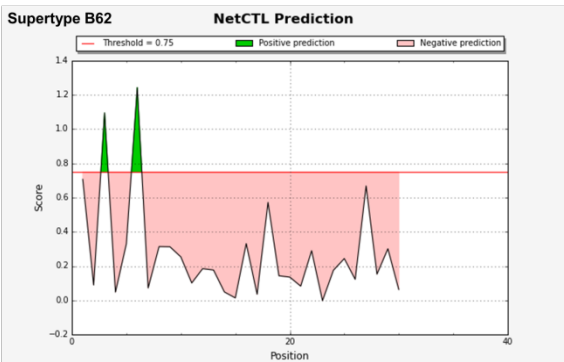

# S glycoprotein

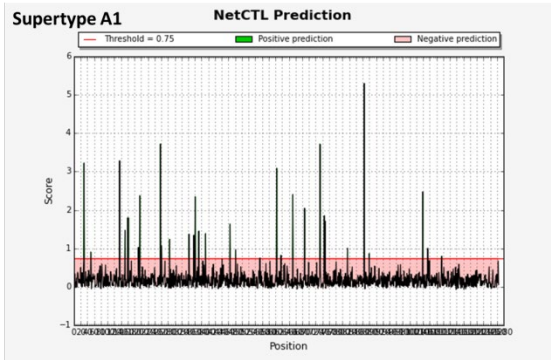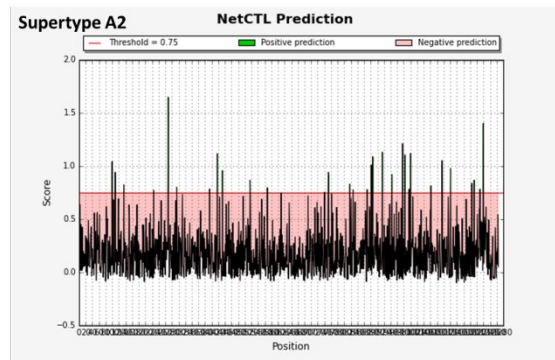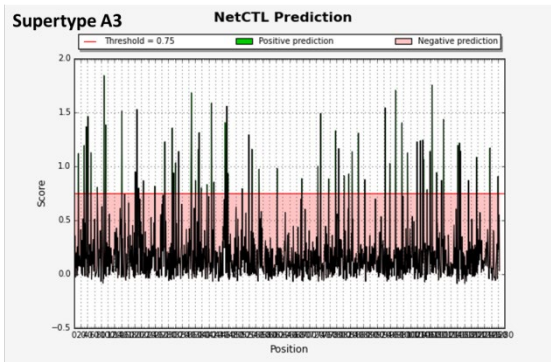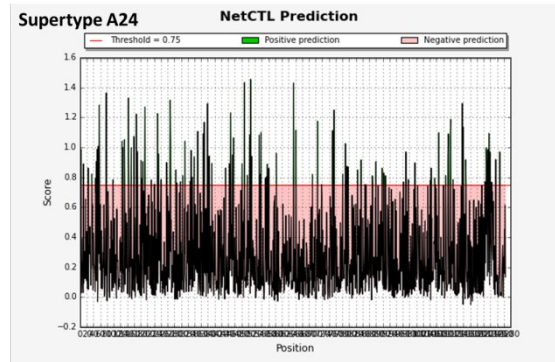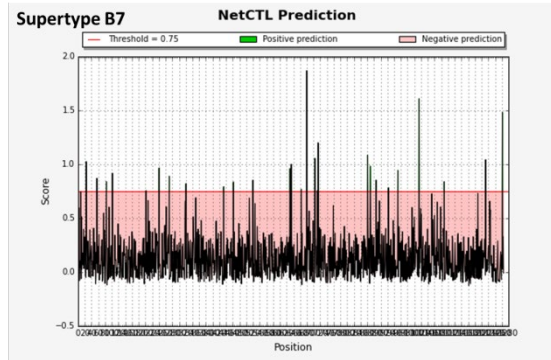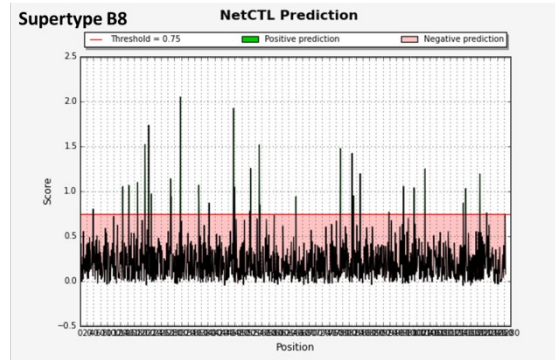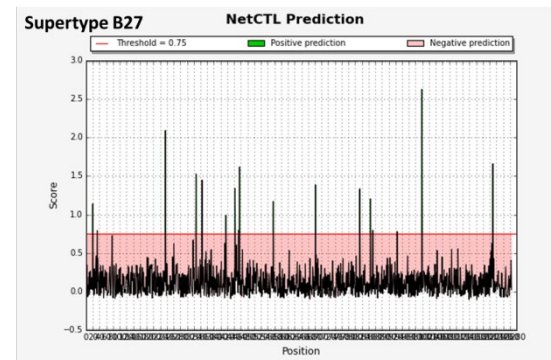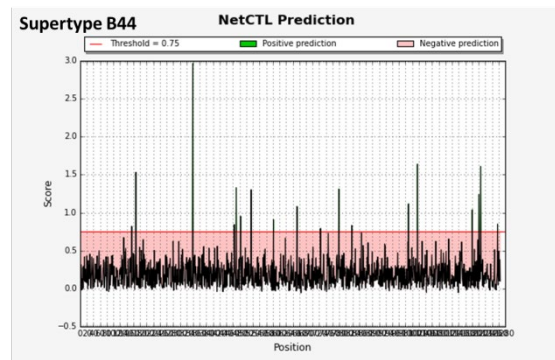

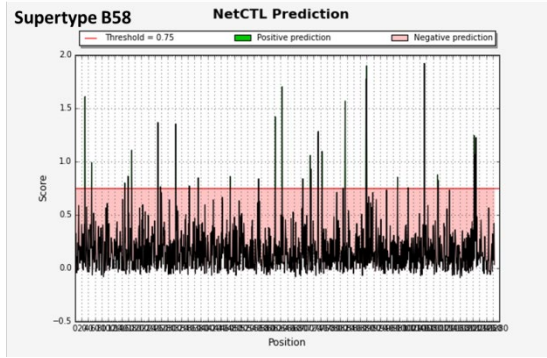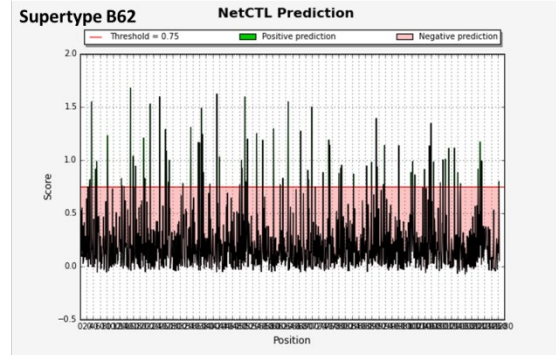

## ORF1ab polyprotein

Supertype A1

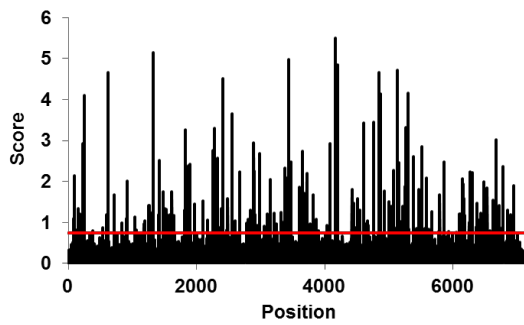

Supertype A2

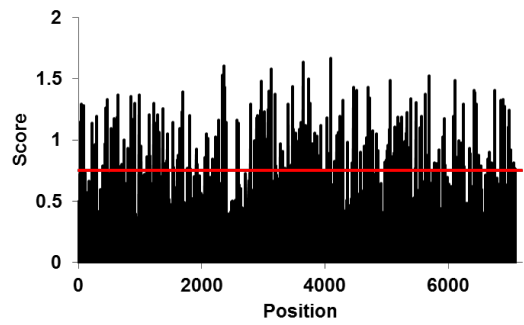

Supertype A3

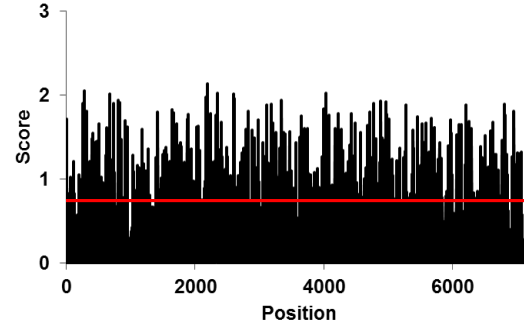

Supertype A24

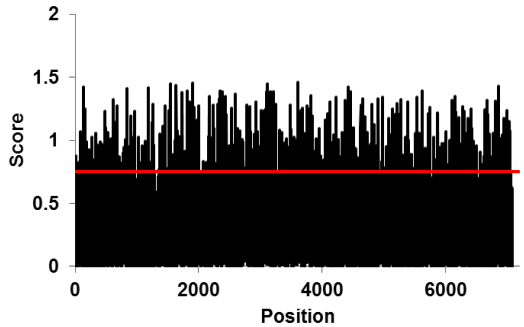

Supertype B7

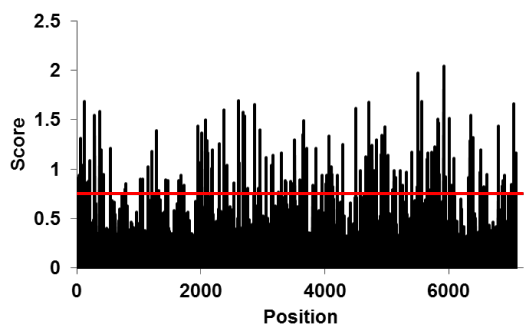

Supertype B8

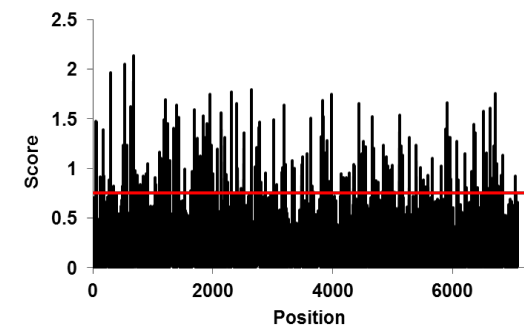

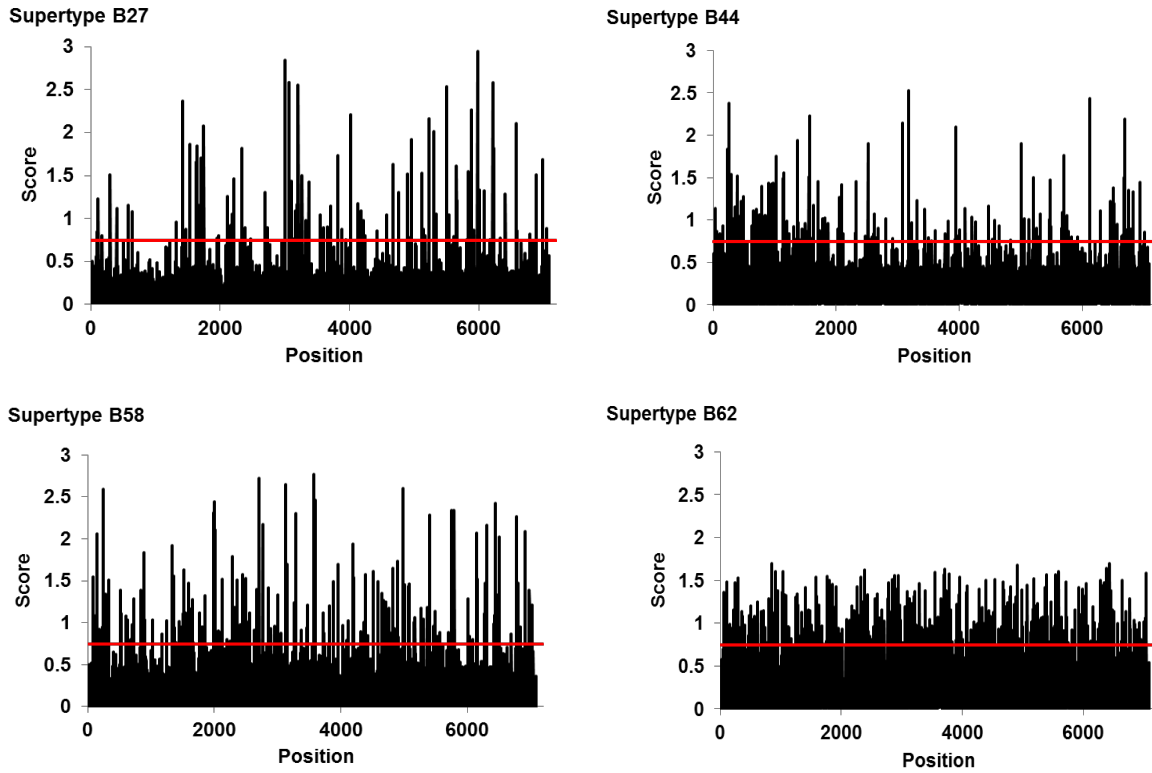

Plots illustrating the NetCTL score for each sequential peptide across the entire amino acid sequence for each SARS-CoV-2 protein. Individual panels represent the score trace for each major HLA class I supertype as indicated. The threshold for positive predictions was set at 0.75.

**Figure S3.** Global population coverage of top SARS-CoV-2 peptides.

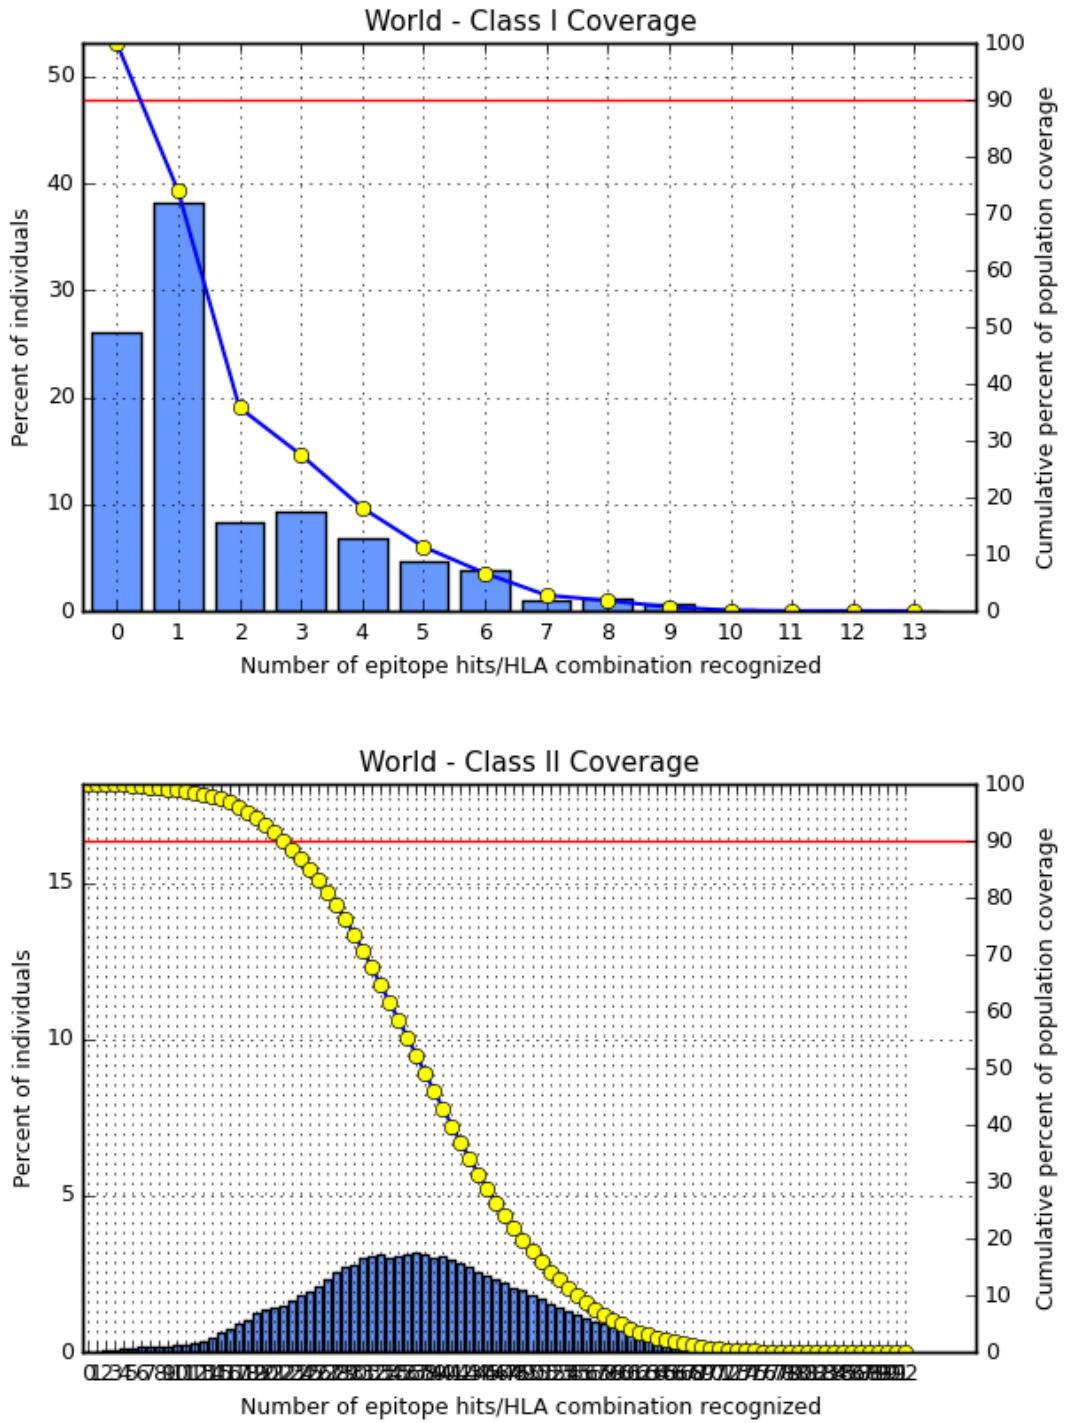

**Table S1.** Mutations identified across SARS-CoV-2 genomes.

| Genome ID                  | Coding Mutation      | Viral Protein <sup>a</sup> | Mutation Effect                                   |
|----------------------------|----------------------|----------------------------|---------------------------------------------------|
| MT039890                   | T26354A              | E protein                  | L37H                                              |
| MN994467/MT044257          | T26729C              | M protein                  | Silent                                            |
| LC522972                   | C29300T              | N protein                  | P344S                                             |
| MN994467                   | A28792T              | N protein                  | Silent                                            |
| MT039888/MT027063/MT027062 | C28853T              | N protein                  | S194L                                             |
| MT106052                   | G28878A              | N protein                  | S202N                                             |
| Several                    | C29094T              | N protein                  | Silent                                            |
| LC521925                   | DelG331-A355         | ORF1ab                     | Deletion<br>G <sub>31</sub> DSVEEVL <sub>38</sub> |
| LC521925                   | C1885T               | ORF1ab                     | Silent                                            |
| LC521925                   | C18483T              | ORF1ab                     | P6083L                                            |
| LC522972                   | G11554T              | ORF1ab                     | E3765D                                            |
| LC522972                   | C15321T              | ORF1ab                     | Silent                                            |
| LC522973                   | C3789T               | ORF1ab                     | A1176V                                            |
| MN975262                   | C9561T               | ORF1ab                     | S3099L                                            |
| MN975262                   | T15607C              | ORF1ab                     | Silent                                            |
| MN985325/MT020881/MT020880 | C18060T              | ORF1ab                     | Silent                                            |
| MN994467                   | G1548A               | ORF1ab                     | S428N                                             |
| MN994468                   | C17000T              | ORF1ab                     | T5579I                                            |
| MN996527                   | G21283A              | ORF1ab                     | D7018N                                            |
| MN996529                   | G7004A               | ORF1ab                     | G2251S                                            |
| MN996529                   | A21125G              | ORF1ab                     | K6958R                                            |
| MN996531                   | A7988C               | ORF1ab                     | D2579A                                            |
| MN996531                   | C9520T               | ORF1ab                     | T3090I                                            |
| MN997409/MT049951          | G11083T/C            | ORF1ab                     | L3606F                                            |
| MT007544                   | T19065C              | ORF1ab                     | Silent                                            |
| MT019529                   | A3778G               | ORF1ab                     | Silent                                            |
| MT019529                   | A8388G               | ORF1ab                     | N2757S                                            |
| MT019529                   | T8987A               | ORF1ab                     | F2908I                                            |
| MT019531                   | T6996C               | ORF1ab                     | I2244T                                            |
| MT019533                   | G7866T               | ORF1ab                     | G2523V                                            |
| MT027062/MT027063          | G614A                | ORF1ab                     | A117T                                             |
| MT027063/MT027062          | A5084G               | ORF1ab                     | I1607V                                            |
| MT027064                   | C2091T               | ORF1ab                     | T609I                                             |
| MT039887                   | C17373T              | ORF1ab                     | Silent                                            |
| MT039887                   | DelA20295-<br>T20297 | ORF1ab                     | L6678del                                          |
| MT039888                   | G3518T               | ORF1ab                     | V1085F                                            |
| MT039888                   | G5480R (AorG)        | ORF1ab                     | A1739X                                            |
| MT039888                   | A17423G              | ORF1ab                     | Y5720C                                            |
| MT039890                   | G2971T               | ORF1ab                     | M902I                                             |
| MT039890                   | C6031T               | ORF1ab                     | Silent                                            |
| MT039890                   | C12115T              | ORF1ab                     | Silent                                            |
| MT039890                   | T15597C              | ORF1ab                     | Silent                                            |
| MT039890                   | C20936T              | ORF1ab                     | T6891M                                            |
| MT044257                   | T490A                | ORF1ab                     | D75E                                              |

|                            |                  |        |                                             |
|----------------------------|------------------|--------|---------------------------------------------|
| MT044257                   | C3177T           | ORF1ab | P971L                                       |
| MT044258                   | DelT508-T522     | ORF1ab | Deletion G <sub>82</sub> HVMV <sub>86</sub> |
| MT044258                   | DelA671-T679     | ORF1ab | Deletion K <sub>141</sub> SF <sub>143</sub> |
| MT066176                   | A9034G           | ORF1ab | Silent                                      |
| MT066176                   | C9491T           | ORF1ab | H3076Y                                      |
| MT093571                   | G2717A           | ORF1ab | Silent                                      |
| MT093571                   | A9274G           | ORF1ab | Silent                                      |
| MT093571                   | C13225G/T13226C  | ORF1ab | F4321L                                      |
| MT093571                   | A17376G          | ORF1ab | Silent                                      |
| MT106054                   | T18603C          | ORF1ab | Silent                                      |
| MT106054                   | T18975A          | ORF1ab | Silent                                      |
| MT106054                   | A19175C          | ORF1ab | D6304A                                      |
| Several                    | C8782T           | ORF1ab | Silent                                      |
| MT039890                   | G25775T          | ORF3a  | W128L                                       |
| Several                    | G26144T          | ORF3a  | G251V                                       |
| MN994467/MT044257          | G28077C          | ORF8   | V12L                                        |
| Several                    | T28144C          | ORF8   | L36S                                        |
| MN994467/MT044257/MT039888 | C24034T          | Spike  | Silent                                      |
| MN996527/MT106053          | A24292G          | Spike  | Silent                                      |
| MT007544                   | T22303G          | Spike  | S247R                                       |
| MT039890                   | C22224G          | Spike  | S221W                                       |
| MT093571                   | T23952G          | Spike  | F797C                                       |
| LC522975                   | G29701T          | UTR    | Unknown                                     |
| MT007544                   | DelC29739-G29749 | UTR    | Unknown                                     |
| MT019530                   | T104A            | UTR    | Unknown                                     |
| MT019530                   | T111C            | UTR    | Unknown                                     |
| MT019530                   | T112G            | UTR    | Unknown                                     |
| MT019530                   | C119G            | UTR    | Unknown                                     |
| MT019530                   | T120C            | UTR    | Unknown                                     |
| MT019530                   | G124A            | UTR    | Unknown                                     |
| MT049951                   | C75A             | UTR    | Unknown                                     |
| MT093631                   | C224T            | UTR    | Unknown                                     |
| MT106052                   | G29742A          | UTR    | Unknown                                     |

<sup>a</sup>UTR = untranslated region

Table S2. Partially refined list of HLA class I epitopes from SARS-CoV-2 proteome.

| <u>Protein</u> | <u>Peptide</u> | <u>Predicted Alleles</u>                           | <u>Predicted Binding Affinity (nM)</u> |
|----------------|----------------|----------------------------------------------------|----------------------------------------|
| E              | LTALRLCAY      | HLA-A*01:01, HLA-B*15:01                           | 139.4, 60.2                            |
| M              | ATSRTLSTYY     | HLA-A*01:01, HLA-A*03:01, HLA-B*15:01, HLA-B*58:01 | 62.4, 184.4, 138.8, 238.6              |
| M              | RLFARTRSM      | HLA-B*07:02, HLA-B*08:01, HLA-B*15:01              | 90.7, 27.6, 31.6                       |
| M              | YANRNRFLY      | HLA-A*01:01, HLA-B*15:01, HLA-B*58:01              | 119.2, 245.3, 65.7                     |
| M              | YFIASFRLF      | HLA-A*24:02, HLA-B*15:01                           | 7.9, 415.6                             |
| N              | FPRGQGVPI      | HLA-B*07:02, HLA-B*08:01                           | 4.7, 368.3                             |

|        |            |                                                       |                        |
|--------|------------|-------------------------------------------------------|------------------------|
| N      | KAYNVTQAF  | HLA-B*15:01, HLA-B*58:01                              | 18.9, 17.7             |
| N      | KPRQKRTAT  | HLA-B*07:02, HLA-B*08:01                              | 18.8, 432.6            |
| N      | LLLDRLNQL  | HLA-A*02:01, HLA-B*08:01                              | 11.3, 136.8            |
| N      | LSPRWYFYF  | HLA-A*01:01, HLA-B*58:01                              | 76.9, 430.6            |
| N      | SPRWYFYYL  | HLA-B*07:02, HLA-B*08:01                              | 15.3, 42.1             |
| S      | FAMQMAYRF  | HLA-A*24:02, HLA-B*15:01,<br>HLA-B*58:01              | 142.9, 123.9, 23.4     |
| S      | MIAQYTSAL  | HLA-A*02:01, HLA-B*07:02,<br>HLA-B*08:01, HLA-B*15:01 | 82.1, 63.6, 80.4, 71.1 |
| S      | SIIAYTMSL  | HLA-A*02:01, HLA-B*08:01,<br>HLA-B*15:01              | 16.9, 239.2, 202.9     |
| S      | WTAGAAAYY  | HLA-A*01:01, HLA-B*15:01,<br>HLA-B*58:01              | 31.1, 65.7, 281.5      |
| S      | YLQPRTFLL  | HLA-A*02:01, HLA-A*24:02,<br>HLA-B*08:01              | 4.1, 201.3, 23.9       |
| S      | YRLFRKSNL  | HLA-B*08:01, HLA-B*27:05                              | 202.3, 68.3            |
| S      | YSSANNCTF  | HLA-B*15:01, HLA-B*58:01                              | 88.0, 33.1             |
| ORF1ab | AMSAFAMMF  | HLA-A*24:02, HLA-B*15:01                              | 294.5, 19.1            |
| ORF1ab | ASHMYCSFY  | HLA-A*01:01, HLA-B*15:01                              | 328.9, 86.2            |
| ORF1ab | CTNYMPYFF  | HLA-A*01:01, HLA-B*58:01                              | 397.9, 30.1            |
| ORF1ab | FLGRYMSAL  | HLA-A*02:01, HLA-B*08:01                              | 9.8, 55.1              |
| ORF1ab | FLKTNCCRF  | HLA-B*08:01, HLA-B*15:01                              | 300.4, 51.4            |
| ORF1ab | FLLNKEMYL  | HLA-A*02:01, HLA-B*08:01                              | 2.6, 91.4              |
| ORF1ab | FLNRFTTTL  | HLA-A*02:01, HLA-B*08:01                              | 5.4, 83.7              |
| ORF1ab | FTDGVCLFW  | HLA-A*01:01, HLA-B*58:01                              | 384.2, 28.6            |
| ORF1ab | FVNLIKQLPF | HLA-B*08:01, HLA-B*15:01                              | 241.3, 68.6            |
| ORF1ab | HSIGFDYVY  | HLA-A*01:01, HLA-B*58:01                              | 102.9, 26.2            |
| ORF1ab | ILFTRFFYV  | HLA-A*02:01, HLA-B*08:01                              | 2.2, 130.8             |
| ORF1ab | IMQLFFSYF  | HLA-A*24:02, HLA-B*15:01                              | 211.4, 85.8            |
| ORF1ab | IPRRNVATL  | HLA-B*07:02, HLA-B*08:01                              | 5.3, 101.8             |
| ORF1ab | IQLSSYSLF  | HLA-A*24:02, HLA-B*15:01                              | 50.2, 11.9             |
| ORF1ab | ISTKHFYWF  | HLA-A*24:02, HLA-B*58:01                              | 172.1, 44.2            |
| ORF1ab | KLAKKFDTF  | HLA-A*24:02, HLA-B*15:01                              | 195.7, 58.6            |
| ORF1ab | KLMGFHAWW  | HLA-A*24:02, HLA-B*58:01                              | 294.3, 49.9            |
| ORF1ab | KLVNKFLAL  | HLA-A*02:01, HLA-B*08:01,<br>HLA-B*15:01              | 30.4, 73.8, 236.5      |
| ORF1ab | KMNYQVNGY  | HLA-A*03:01, HLA-B*15:01                              | 132.3, 49.1            |
| ORF1ab | KSYELQTPF  | HLA-B*15:01, HLA-B*58:01                              | 28.5, 12.3             |
| ORF1ab | LASHMYCSF  | HLA-B*15:01, HLA-B*58:01                              | 48.1, 66.1             |
| ORF1ab | LLADKFPVL  | HLA-A*02:01, HLA-B*08:01                              | 11.1, 106.3            |
| ORF1ab | LLTNMFTPL  | HLA-A*02:01, HLA-B*08:01,<br>HLA-B*15:01              | 27.2, 230.1, 200.1     |
| ORF1ab | LMIERFVSL  | HLA-A*02:01, HLA-B*08:01,<br>HLA-B*15:01              | 6.8, 6.6, 43.2         |
| ORF1ab | LMNVLTLYY  | HLA-A*01:01, HLA-A*03:01,<br>HLA-B*15:01              | 238.7, 115.2, 11.6     |
| ORF1ab | LSFKELLYY  | HLA-A*01:01, HLA-B*15:01,<br>HLA-B*58:01              | 371.8, 42.6, 35.7      |
| ORF1ab | LTNIFGTVY  | HLA-A*01:01, HLA-B*15:01,<br>HLA-B*58:01              | 64.6, 73.7, 479.9      |
| ORF1ab | LVAEWFLAY  | HLA-A*01:01, HLA-A*03:01,                             | 191.6, 378.8, 32.1     |



|        |            | HLA-B*15:01                              |                    |
|--------|------------|------------------------------------------|--------------------|
| ORF1ab | MFTPLVPFW  | HLA-A*24:02, HLA-B*58:01                 | 141.6, 80.6        |
| ORF1ab | MMISAGFSL  | HLA-A*02:01, HLA-B*08:01,<br>HLA-B*15:01 | 6.9, 367.6, 16.2   |
| ORF1ab | MMSAPPAQY  | HLA-A*01:01, HLA-B*15:01,<br>HLA-B*58:01 | 157.3, 14.4, 447.6 |
| ORF1ab | MPYFFTLLL  | HLA-B*07:02, HLA-B*08:01                 | 103.1, 271.0       |
| ORF1ab | MSMTYGQQF  | HLA-B*15:01, HLA-B*58:01                 | 28.1, 11.4         |
| ORF1ab | MSNLGMPSY  | HLA-A*01:01, HLA-B*15:01,<br>HLA-B*58:01 | 184.2, 74.1, 87.6  |
| ORF1ab | MVMCGGSLY  | HLA-A*03:01, HLA-B*15:01                 | 143.8, 14.1        |
| ORF1ab | NPAWRKAVF  | HLA-B*07:02, HLA-B*08:01                 | 23.5, 158.4        |
| ORF1ab | QLYLGMSY   | HLA-A*03:01, HLA-B*15:01                 | 68.1, 25.2         |
| ORF1ab | RLYYDSMSY  | HLA-A*03:01, HLA-B*15:01                 | 10.9, 7.9          |
| ORF1ab | RMYIFFASF  | HLA-A*24:02, HLA-B*15:01                 | 196.9, 13.9        |
| ORF1ab | RQFHQKLLK  | HLA-A*03:01, HLA-B*27:05                 | 16.9, 104.5        |
| ORF1ab | RTAPHGHVM  | HLA-B*07:02, HLA-B*15:01,<br>HLA-B*58:01 | 56.4, 62.2, 189.1  |
| ORF1ab | RTNVYLAVF  | HLA-B*15:01, HLA-B*58:01                 | 36.4, 24.4         |
| ORF1ab | SMMGFKMNY  | HLA-A*03:01, HLA-B*15:01                 | 20.3, 23.4         |
| ORF1ab | SSAKSASVY  | HLA-A*01:01, HLA-B*15:01                 | 444.5, 48.4        |
| ORF1ab | SSLPSYAAF  | HLA-B*15:01, HLA-B*58:01                 | 49.2, 101.1        |
| ORF1ab | STNVTIATY  | HLA-A*01:01, HLA-B*15:01,<br>HLA-B*58:01 | 241.1, 81.9, 294.5 |
| ORF1ab | TQYNRYLAL  | HLA-B*08:01, HLA-B*15:01                 | 39.5, 73.2         |
| ORF1ab | TVAYFNMVY  | HLA-A*01:01, HLA-B*15:01                 | 456.8, 57.8        |
| ORF1ab | VAKSHNIAL  | HLA-B*07:02, HLA-B*08:01                 | 102.0, 98.0        |
| ORF1ab | VMHANYIFW  | HLA-A*24:02, HLA-B*58:01                 | 188.0, 69.6        |
| ORF1ab | VMYMGTLSY  | HLA-A*03:01, HLA-B*15:01                 | 9.2, 5.3           |
| ORF1ab | VPMEKCLKTL | HLA-B*07:02, HLA-B*08:01                 | 17.3, 90.8         |
| ORF1ab | VQSTQWSLF  | HLA-A*24:02, HLA-B*15:01                 | 258.7, 31.3        |
| ORF1ab | VVYRGTTTTY | HLA-A*03:01, HLA-B*15:01                 | 70.9, 23.3         |
| ORF1ab | WSMATYYLF  | HLA-A*24:02, HLA-B*15:01,<br>HLA-B*58:01 | 15.6, 42.7, 8.6    |
| ORF1ab | YFMRFRRAF  | HLA-A*24:02, HLA-B*08:01                 | 124.5, 91.6        |
| ORF1ab | YIFFASFYY  | HLA-A*01:01, HLA-A*03:01                 | 89.8, 195.5        |
| ORF1ab | YLDAYNMMI  | HLA-A*01:01, HLA-A*02:01                 | 236.2, 2.9         |
| ORF1ab | YLITPVHVM  | HLA-A*02:01, HLA-B*15:01                 | 26.5, 49.2         |
| ORF1ab | YLRKHFSMM  | HLA-B*07:02, HLA-B*08:01,<br>HLA-B*15:01 | 168.3, 5.2, 37.8   |
| ORF1ab | YMPYFFTLL  | HLA-A*02:01, HLA-A*24:02                 | 11.2, 177.5        |
| ORF1ab | YTEISFMLW  | HLA-A*01:01, HLA-B*58:01                 | 305.4, 16.9        |
| ORF1ab | YVMHANYIF  | HLA-A*24:02, HLA-B*15:01,<br>HLA-B*58:01 | 79.2, 28.8, 151.4  |
| ORF3a  | APFLYLYAL  | HLA-B*07:02, HLA-B*08:01                 | 50.1, 156.7        |
| ORF7   | ITLATCELY  | HLA-A*01:01, HLA-B*58:01                 | 285.7, 84.4        |

**Table S3.** Partially refined list of HLA class II epitopes from SARS-CoV-2 proteome.

| <b><u>Protein</u></b> | <b><u>Peptide</u></b> | <b><u>Predicted Alleles</u></b>                                                                                                                       | <b><u>Predicted Binding Affinity (nM)</u></b>    |
|-----------------------|-----------------------|-------------------------------------------------------------------------------------------------------------------------------------------------------|--------------------------------------------------|
| E                     | FYVYSRVKLNLSRV        | HLA-DRB1*04:01, HLA-DRB1*04:05, HLA-DRB1*08:02, HLA-DRB1*11:01, HLA-DRB3*02:02, HLA-DRB5*01:01                                                        | 50.1, 69.7, 148.1, 47.2, 130.8, 67.6             |
| E                     | SFYVYSRVKLNLSR        | HLA-DRB1*11:01, HLA-DRB3*02:02, HLA-DRB5*01:01                                                                                                        | 42.3, 164.0, 62.1                                |
| E                     | LVTLAILTALRLCAY       | HLA-DRB1*11:01, HLA-DRB1*12:01, HLA-DRB1*15:01, HLA-DRB4*01:01                                                                                        | 82.2, 121.5, 75.5, 97.4                          |
| M                     | TLSYYKLGASQRVAG       | HLA-DRB1*01:01, HLA-DRB5*01:01                                                                                                                        | 7.3, 16.7                                        |
| M                     | RTLSYYKLGASQRVA       | HLA-DRB1*01:01, HLA-DRB1*04:01, HLA-DRB1*04:05, HLA-DRB1*07:01, HLA-DRB1*09:01                                                                        | 7.5, 71.3, 118.8, 31.5, 25.6                     |
| M                     | ASFRLFARTRSMWSF       | HLA-DRB1*01:01, HLA-DRB1*07:01, HLA-DRB1*08:02, HLA-DRB1*09:01, HLA-DRB1*11:01, HLA-DRB5*01:01, HLA-DPA1*02:01/DPB1*05:01, HLA-DPA1*02:01/DPB1*14:01  | 19.2, 30.9, 53.5, 49.9, 12.2, 16.3, 256.2, 387.3 |
| M                     | IASRLFARTRSMWS        | HLA-DRB1*01:01, HLA-DRB1*04:05                                                                                                                        | 23.9, 77.8                                       |
| M                     | LLQFAYANRNRFYI        | HLA-DRB1*03:01, HLA-DRB1*07:01, HLA-DRB1*08:02, HLA-DRB1*11:01, HLA-DRB1*13:02, HLA-DRB3*02:02, HLA-DRB5*01:01                                        | 179.8, 58.2, 225.6, 36.2, 27.8, 46.6, 26.3       |
| M                     | SFRLFARTRSMWSFN       | HLA-DRB1*04:01, HLA-DRB1*04:05                                                                                                                        | 47.5, 53.7                                       |
| M                     | ETNILLNVPLHGIL        | HLA-DRB1*08:02, HLA-DRB1*13:02, HLA-DRB3*02:02                                                                                                        | 228.4, 24.3, 66.5                                |
| M                     | LSYFIASFRLFARTR       | HLA-DRB1*11:01, HLA-DRB1*15:01, HLA-DPA1*02:01/DPB1*01:01, HLA-DPA1*03:01/DPB1*04:02, HLA-DPA1*02:01/DPB1*05:01                                       | 27.4, 36.3, 75.5, 94.8, 112.8                    |
| M                     | ILRGHLRIAGHHLGR       | HLA-DRB1*11:01, HLA-DRB4*01:01, HLA-DRB5*01:01                                                                                                        | 37.6, 87.1, 34.2                                 |
| M                     | MWLSYFIASFRLFAR       | HLA-DRB1*15:01, HLA-DPA1*02:01/DPB1*01:01, HLA-DPA1*01:03/DPB1*02:01, HLA-DPA1*01:03/DPB1*04:01, HLA-DPA1*03:01/DPB1*04:02, HLA-DPA1*02:01/DPB1*05:01 | 31.8, 63.4, 29.8, 42.5, 79.9, 133.8              |

|   |                  |                                                                                                                                                                                                          |                                                    |
|---|------------------|----------------------------------------------------------------------------------------------------------------------------------------------------------------------------------------------------------|----------------------------------------------------|
| M | YRINWITGGIAIAMA  | HLA-DQA1*05:01/DQB1*03:01,<br>HLA-DQA1*01:02/DQB1*06:02                                                                                                                                                  | 20.2, 56.4                                         |
| M | GLMWLSYFIASFRLF  | HLA-DQA1*01:01/DQB1*05:01,<br>HLA-DPA1*01:03/DPB1*02:01,<br>HLA-DPA1*01:03/DPB1*04:01                                                                                                                    | 141.4, 38.2, 54.4                                  |
| M | SYFIASFRLFARTRS  | HLA-DPA1*01:03/DPB1*02:01,<br>HLA-DPA1*01:03/DPB1*04:01                                                                                                                                                  | 52.6, 73.7                                         |
| N | QIAQFAPSASAFFGM  | HLA-DRB1*07:01, HLA-<br>DRB1*09:01, HLA-<br>DQA1*05:01/DQB1*03:01                                                                                                                                        | 32.2, 30.1, 57.8                                   |
| N | QIGYYRRATRRIRGG  | HLA-DRB1*08:02, HLA-<br>DRB1*11:01                                                                                                                                                                       | 111.2, 14.9                                        |
| N | QQTVTLLPAADLDDF  | HLA-DQA1*05:01/DQB1*02:01,<br>HLA-DQA1*04:01/DQB1*04:02                                                                                                                                                  | 188.6, 453.6                                       |
| S | AAEIRASANLAATKM  | HLA-DRB1*08:02, HLA-<br>DRB1*13:02, HLA-DRB3*02:02,<br>HLA-DQA1*01:02/DQB1*06:02,<br>HLA-DPA1*02:01/DPB1*14:01                                                                                           | 101.3, 23.0, 52.7,<br>141.5, 327.4                 |
| S | ALQIPFAMQMAYRFN  | HLA-DRB1*09:01, HLA-<br>DRB1*12:01, HLA-DRB1*15:01                                                                                                                                                       | 52.9, 159.5, 50.3                                  |
| S | AQKFNGLTVLPPLLT  | HLA-DRB1*04:01, HLA-<br>DRB1*04:05                                                                                                                                                                       | 63.1, 46.9                                         |
| S | DLFLPFFSNVTWFHA  | HLA-DRB1*04:01, HLA-<br>DRB1*04:05, HLA-<br>DPA1*01:03/DPB1*02:01, HLA-<br>DPA1*01:03/DPB1*04:01                                                                                                         | 74.8, 60.5, 64.7, 100.0                            |
| S | DSSSGWTAGAAAYYV  | HLA-DQA1*05:01/DQB1*03:01,<br>HLA-DQA1*04:01/DQB1*04:02                                                                                                                                                  | 22.9, 455.2                                        |
| S | FGEVFNATRFASVYA  | HLA-DRB1*07:01, HLA-<br>DPA1*02:01/DPB1*01:01, HLA-<br>DPA1*01:03/DPB1*02:01, HLA-<br>DPA1*01:03/DPB1*04:01, HLA-<br>DPA1*03:01/DPB1*04:02, HLA-<br>DPA1*02:01/DPB1*05:01, HLA-<br>DPA1*02:01/DPB1*14:01 | 25.5, 35.9, 19.6, 24.6,<br>55.0, 160.5, 278.3      |
| S | GINITRFQTLALHR   | HLA-DRB1*04:01, HLA-<br>DRB1*04:05, HLA-DRB1*12:01,<br>HLA-DRB1*15:01, HLA-<br>DPA1*02:01/DPB1*01:01, HLA-<br>DPA1*03:01/DPB1*04:02, HLA-<br>DPA1*02:01/DPB1*14:01                                       | 64.3, 45.1, 145.1,<br>27.6, 106.0, 167.6,<br>433.6 |
| S | GNYNYLYRLFRKSNL  | HLA-DRB1*15:01, HLA-<br>DRB5*01:01                                                                                                                                                                       | 57.5, 31.5                                         |
| S | GWTFGAGAALQIPFA  | HLA-DRB1*01:01, HLA-<br>DRB1*09:01, HLA-<br>DQA1*05:01/DQB1*03:01                                                                                                                                        | 16.2, 24.8, 20.8                                   |
| S | IIAYTMSLGAENSVVA | HLA-DRB1*01:01, HLA-<br>DRB1*04:01, HLA-DRB1*09:01,<br>HLA-DQA1*01:02/DQB1*06:02                                                                                                                         | 8.9, 55.0, 24.1, 171.3                             |
| S | ITRFQTLALHRSYL   | HLA-DRB1*01:01, HLA-<br>DRB1*12:01, HLA-DRB1*15:01,<br>HLA-DRB5*01:01, HLA-<br>DPA1*02:01/DPB1*05:01, HLA-<br>DPA1*02:01/DPB1*14:01                                                                      | 10.7, 108.3, 34.9,<br>10.1, 156.2, 318.0           |
| S | ITSGWTFGAGAALQI  | HLA-DRB1*09:01, HLA-                                                                                                                                                                                     | 36.2, 24.4                                         |

|   |                  |                                                                                                                                                   |                                  |
|---|------------------|---------------------------------------------------------------------------------------------------------------------------------------------------|----------------------------------|
|   |                  | DQA1*05:01/DQB1*03:01                                                                                                                             |                                  |
| S | KRSFIEDLLFNKVTL  | HLA-DPA1*02:01/DPB1*01:01,<br>HLA-DPA1*01:03/DPB1*02:01,<br>HLA-DPA1*01:03/DPB1*04:01,<br>HLA-DPA1*03:01/DPB1*04:02,<br>HLA-DPA1*02:01/DPB1*05:01 | 51.5, 36.1, 50.3, 68.5,<br>158.4 |
| S | LFLPFFSNVTWFHAI  | HLA-DRB1*04:05, HLA-<br>DPA1*01:03/DPB1*02:01, HLA-<br>DPA1*01:03/DPB1*04:01                                                                      | 62.9, 53.2, 83.1                 |
| S | LQIPFAMQMAYRFNG  | HLA-DRB4*01:01, HLA-<br>DRB5*01:01                                                                                                                | 68.8, 20.9                       |
| S | NCTFEYVSQPFLMDL  | HLA-DPA1*02:01/DPB1*01:01,<br>HLA-DPA1*01:03/DPB1*02:01,<br>HLA-DPA1*01:03/DPB1*04:01,<br>HLA-DPA1*03:01/DPB1*04:02                               | 53.3, 30.9, 41.3, 70.1           |
| S | NITRFQTLALHRSY   | HLA-DRB1*04:01, HLA-<br>DRB1*04:05, HLA-DRB1*08:02,<br>HLA-DRB4*01:01                                                                             | 57.3, 41.9, 125.1, 54.1          |
| S | NYNYLYRLLFRKSNLK | HLA-DRB1*08:02, HLA-<br>DRB1*11:01, HLA-DRB1*15:01,<br>HLA-DRB5*01:01, HLA-<br>DPA1*02:01/DPB1*05:01                                              | 148.6, 16.6, 52.9,<br>168.8      |
| S | PINLVRDLPQGFSAL  | HLA-DRB1*03:01, HLA-<br>DRB3*01:01                                                                                                                | 51.7, 56.8                       |
| S | PYRVVLSFELLHAP   | HLA-DPA1*02:01/DPB1*01:01,<br>HLA-DPA1*01:03/DPB1*02:01,<br>HLA-DPA1*01:03/DPB1*04:01,<br>HLA-DPA1*03:01/DPB1*04:02                               | 79.6, 53.3, 77.1, 92.9           |
| S | QDLFLPFFSNVTWFH  | HLA-DRB1*04:01, HLA-<br>DRB1*15:01                                                                                                                | 88.4, 44.6                       |
| S | QPYRVVLSFELLHA   | HLA-DPA1*02:01/DPB1*01:01,<br>HLA-DPA1*01:03/DPB1*02:01,<br>HLA-DPA1*01:03/DPB1*04:01,<br>HLA-DPA1*03:01/DPB1*04:02,<br>HLA-DPA1*02:01/DPB1*05:01 | 73.2, 50.2, 71.4, 90.1,<br>211.1 |
| S | QQLIRAAEIRASANL  | HLA-DRB1*08:02, HLA-<br>DRB4*01:01, HLA-<br>DQA1*01:02/DQB1*06:02, HLA-<br>DPA1*02:01/DPB1*14:01                                                  | 76.1, 42.9, 53.9, 229.4          |
| S | QSLIVNNTATNVVIK  | HLA-DRB1*04:01, HLA-<br>DRB1*13:02, HLA-DRB3*02:02                                                                                                | 77.2, 5.9, 13.1                  |
| S | REGVFSVSNQTHWFVT | HLA-DRB1*13:02, HLA-<br>DRB3*02:02                                                                                                                | 21.4, 25.8                       |
| S | RSFIEDLLFNKVTLA  | HLA-DPA1*01:03/DPB1*02:01,<br>HLA-DPA1*01:03/DPB1*04:01                                                                                           | 45.4, 63.1                       |
| S | SIHAYTMSLGAENSV  | HLA-DRB1*04:05, HLA-<br>DRB1*07:01                                                                                                                | 68.4, 35.7                       |
| S | TQLNRALTGIAVEQD  | HLA-DQA1*03:01/DQB1*03:02,<br>HLA-DQA1*04:01/DQB1*04:02                                                                                           | 445.8, 373.3                     |
| S | TRFQTLALHRSYLT   | HLA-DRB1*11:01, HLA-<br>DRB1*12:01                                                                                                                | 20.9, 117.1                      |
| S | TSNFRVQPTESIVRF  | HLA-DRB1*04:01, HLA-<br>DRB1*04:05                                                                                                                | 52.4, 83.9                       |
| S | VFNATRFASVYAWNR  | HLA-DRB1*09:01, HLA-<br>DQA1*01:02/DQB1*06:02                                                                                                     | 48.7, 141.4                      |

|        |                  |                                                                                                                           |                                           |
|--------|------------------|---------------------------------------------------------------------------------------------------------------------------|-------------------------------------------|
| S      | VNFNFNGLTGTGVLT  | HLA-DRB1*01:01, HLA-DRB1*09:01                                                                                            | 14.5, 47.2                                |
| S      | YQPYRVVLSFELLH   | HLA-DPA1*02:01/DPB1*01:01, HLA-DPA1*01:03/DPB1*04:01, HLA-DPA1*03:01/DPB1*04:02, HLA-DPA1*02:01/DPB1*05:01                | 102.2, 93.0, 127.5, 299.3                 |
| ORF1ab | AAIFYLITPVHVMSK  | HLA-DRB1*01:01, HLA-DRB1*04:01, HLA-DRB1*04:05, HLA-DRB1*07:01, HLA-DRB1*08:02, HLA-DRB1*09:01, HLA-DRB1*15:01            | 9.9, 77.9, 59.6, 21.3, 116.2, 49.2, 49.4  |
| ORF1ab | AARYMRSCLKVPATVS | HLA-DRB1*01:01, HLA-DRB1*04:01, HLA-DRB1*04:05, HLA-DRB1*08:02, HLA-DRB1*11:01, HLA-DRB4*01:01, HLA-DPA1*02:01/DPB1*14:01 | 10.9, 64.7, 82.9, 54.4, 23.9, 59.1, 249.3 |
| ORF1ab | ACRKVQHMMVKAALL  | HLA-DRB4*01:01, HLA-DPA1*02:01/DPB1*14:01                                                                                 | 77.5, 486.3                               |
| ORF1ab | AFGLVAEWFLAYILF  | HLA-DPA1*01:03/DPB1*02:01, HLA-DPA1*01:03/DPB1*04:01                                                                      | 40.2, 66.6                                |
| ORF1ab | AHIQWMVMFTPLVPF  | HLA-DQA1*01:01/DQB1*05:01, HLA-DPA1*03:01/DPB1*04:02                                                                      | 285.1, 141.4                              |
| ORF1ab | AILLASFSASTSAFV  | HLA-DRB1*01:01, HLA-DRB1*04:01, HLA-DRB1*04:05, HLA-DQA1*05:01/DQB1*03:01, HLA-DQA1*01:02/DQB1*06:02                      | 13.8, 76.6, 87.5, 49.3, 152.2             |
| ORF1ab | AKRFKESPFLEDFI   | HLA-DPA1*02:01/DPB1*01:01, HLA-DPA1*03:01/DPB1*04:02                                                                      | 73.2, 146.7                               |
| ORF1ab | ALDISASIVAGGIVA  | HLA-DQA1*05:01/DQB1*03:01, HLA-DQA1*01:02/DQB1*06:02                                                                      | 32.9, 73.9                                |
| ORF1ab | AMMFTSDLATNNLVV  | HLA-DRB1*04:01, HLA-DRB3*01:01                                                                                            | 77.5, 63.1                                |
| ORF1ab | ANYIFWRNTNPIQLS  | HLA-DRB1*04:05, HLA-DRB1*07:01, HLA-DRB1*13:02                                                                            | 89.9, 35.2, 13.5                          |
| ORF1ab | ARVVRISFRTLETA   | HLA-DRB1*15:01, HLA-DPA1*02:01/DPB1*05:01                                                                                 | 55.9, 282.2                               |
| ORF1ab | ARYMRSCLKVPATVSV | HLA-DRB1*04:01, HLA-DRB1*04:05, HLA-DRB1*08:02                                                                            | 64.7, 87.3, 54.4                          |
| ORF1ab | ASFNYLKSPNFSKLI  | HLA-DRB1*01:01, HLA-DRB1*04:01, HLA-DRB1*07:01, HLA-DRB5*01:01                                                            | 12.1, 66.5, 36.4, 28.8                    |
| ORF1ab | AVNLLTNMFTPLIQP  | HLA-DPA1*01:03/DPB1*02:01, HLA-DPA1*01:03/DPB1*04:01, HLA-DPA1*03:01/DPB1*04:02                                           | 55.8, 95.0, 142.2                         |
| ORF1ab | AVVLLILMTARTVYD  | HLA-DRB1*01:01, HLA-DRB1*08:02, HLA-DRB4*01:01                                                                            | 14.5, 140.1, 77.3                         |
| ORF1ab | CTNYMPYFFTLQL    | HLA-DPA1*02:01/DPB1*01:01, HLA-DPA1*01:03/DPB1*02:01, HLA-DPA1*01:03/DPB1*04:01, HLA-DPA1*03:01/DPB1*04:02                | 108.2, 40.8, 54.1, 112.4                  |
| ORF1ab | DMILSLLSKGRLIIR  | HLA-DRB1*12:01, HLA-DRB1*15:01, HLA-DRB4*01:01                                                                            | 85.4, 38.9, 52.9                          |
| ORF1ab | EAARYMRSCLKVPATV | HLA-DRB1*01:01, HLA-DRB1*15:01, HLA-DRB4*01:01, HLA-DRB5*01:01, HLA-                                                      | 11.5, 50.4, 64.5, 31.0, 288.8             |

|        |                 |                                                                                                                                       |                                           |
|--------|-----------------|---------------------------------------------------------------------------------------------------------------------------------------|-------------------------------------------|
|        |                 | DPA1*02:01/DPB1*14:01                                                                                                                 |                                           |
| ORF1ab | EASFNYLKSPNFSKL | HLA-DRB1*04:05, HLA-DRB1*09:01, HLA-DRB5*01:01                                                                                        | 69.6, 47.8, 33.6                          |
| ORF1ab | EKLKTLVATAEAELA | HLA-DQA1*05:01/DQB1*02:01, HLA-DQA1*03:01/DQB1*03:02, HLA-DQA1*04:01/DQB1*04:02, HLA-DPA1*02:01/DPB1*14:01                            | 117.7, 309.6, 233.5, 476.4                |
| ORF1ab | ELLVYAADPAMHAAS | HLA-DRB1*01:01, HLA-DRB1*03:01, HLA-DRB1*04:01, HLA-DRB1*04:05, HLA-DRB3*01:01, HLA-DRB3*02:02, HLA-DQA1*05:01/DQB1*02:01             | 14.9, 99.3, 37.3, 83.0, 29.6, 66.6, 240.7 |
| ORF1ab | EMYLKLRSVDLLPLT | HLA-DRB3*01:01, HLA-DPA1*02:01/DPB1*01:01, HLA-DPA1*03:01/DPB1*04:02                                                                  | 56.9, 93.5, 148.9                         |
| ORF1ab | ERLKLFAAETLKATE | HLA-DRB1*01:01, HLA-DRB1*04:01, HLA-DRB1*04:05, HLA-DPA1*03:01/DPB1*04:02, HLA-DPA1*02:01/DPB1*05:01                                  | 11.9, 47.4, 61.4, 164.7, 160.2            |
| ORF1ab | ERYKLEGYAFEHIVY | HLA-DPA1*02:01/DPB1*01:01, HLA-DPA1*01:03/DPB1*02:01, HLA-DPA1*01:03/DPB1*04:01                                                       | 101.7, 61.4, 83.1                         |
| ORF1ab | EWFLAYILFTRFFYV | HLA-DPA1*02:01/DPB1*01:01, HLA-DPA1*01:03/DPB1*02:01, HLA-DPA1*01:03/DPB1*04:01, HLA-DPA1*03:01/DPB1*04:02, HLA-DPA1*02:01/DPB1*05:01 | 79.6, 26.3, 33.1, 73.4, 287.7             |
| ORF1ab | EYSHVVAFNTLLFLM | HLA-DPA1*01:03/DPB1*02:01, HLA-DPA1*01:03/DPB1*04:01, HLA-DPA1*03:01/DPB1*04:02                                                       | 59.2, 98.5, 147.3                         |
| ORF1ab | FAMGIIAMSAFAMMF | HLA-DRB1*12:01, HLA-DRB1*15:01, HLA-DQA1*05:01/DQB1*03:01                                                                             | 141.0, 38.6, 60.1                         |
| ORF1ab | FGEYSHVVAFNTLLF | HLA-DRB1*04:05, HLA-DRB1*07:01, HLA-DRB1*09:01                                                                                        | 85.9, 29.7, 48.3                          |
| ORF1ab | FKWDLTAFGLVAEWF | HLA-DQA1*05:01/DQB1*02:01, HLA-DQA1*03:01/DQB1*03:02, HLA-DQA1*04:01/DQB1*04:02                                                       | 178.3, 425.3, 349.3                       |
| ORF1ab | FLELAMDEFIERYKL | HLA-DRB1*03:01, HLA-DPA1*02:01/DPB1*01:01, HLA-DPA1*03:01/DPB1*04:02, HLA-DPA1*02:01/DPB1*05:01                                       | 98.0, 86.9, 147.1, 288.8                  |
| ORF1ab | FYAYLRKHFSMMILS | HLA-DRB1*07:01, HLA-DRB1*09:01, HLA-DRB1*15:01, HLA-DRB4*01:01, HLA-DPA1*02:01/DPB1*05:01, HLA-DPA1*02:01/DPB1*14:01                  | 27.8, 49.7, 24.7, 87.6, 202.6, 420.7      |
| ORF1ab | GDQFKHLIPLMYKGL | HLA-DRB1*04:05, HLA-DRB1*12:01, HLA-DRB5*01:01                                                                                        | 80.6, 157.9, 31.4                         |
| ORF1ab | GDYFVLTSHTVMPLS | HLA-DRB1*01:01, HLA-DRB1*04:01, HLA-DRB1*04:05, HLA-DRB1*07:01, HLA-DRB1*09:01                                                        | 10.0, 77.4, 83.9, 19.0, 42.9              |
| ORF1ab | HIQWMVMFTPLVPFW | HLA-DQA1*01:01/DQB1*05:01, HLA-DPA1*02:01/DPB1*01:01,                                                                                 | 293.1, 116.3, 84.6, 135.4                 |

|        |                  |                                                                                                                                                                                 |                                                            |
|--------|------------------|---------------------------------------------------------------------------------------------------------------------------------------------------------------------------------|------------------------------------------------------------|
|        |                  | HLA-DPA1*01:03/DPB1*04:01,<br>HLA-DPA1*03:01/DPB1*04:02                                                                                                                         |                                                            |
| ORF1ab | HQKLLKSIAATRGAT  | HLA-DRB1*01:01, HLA-<br>DRB1*08:02, HLA-DRB5*01:01                                                                                                                              | 9.9, 55.9, 16.7                                            |
| ORF1ab | IASEFSSLPSYAAFA  | HLA-DRB1*04:01, HLA-<br>DRB1*04:05, HLA-DRB1*09:01                                                                                                                              | 40.8, 47.9, 36.8                                           |
| ORF1ab | IDFLELAMDEFIERY  | HLA-DQA1*01:01/DQB1*05:01,<br>HLA-DPA1*02:01/DPB1*01:01,<br>HLA-DPA1*03:01/DPB1*04:02                                                                                           | 114.7, 83.4, 151.0                                         |
| ORF1ab | IINLVQMAPISAMVR  | HLA-DRB1*01:01, HLA-<br>DRB1*08:02, HLA-DRB4*01:01                                                                                                                              | 12.8, 118.8, 54.7                                          |
| ORF1ab | IKNFKSVLYYQNNVF  | HLA-DPA1*02:01/DPB1*01:01,<br>HLA-DPA1*01:03/DPB1*04:01,<br>HLA-DPA1*02:01/DPB1*05:01                                                                                           | 103.0, 83.0, 251.4                                         |
| ORF1ab | INLVQMAPISAMVRM  | HLA-DRB1*12:01, HLA-<br>DRB4*01:01, HLA-<br>DQA1*01:02/DQB1*06:02, HLA-<br>DPA1*02:01/DPB1*14:01                                                                                | 176.9, 57.1, 116.5,<br>398.6                               |
| ORF1ab | IVFMCVEYCPFFIT   | HLA-DPA1*02:01/DPB1*01:01,<br>HLA-DPA1*01:03/DPB1*02:01,<br>HLA-DPA1*01:03/DPB1*04:01,<br>HLA-DPA1*03:01/DPB1*04:02                                                             | 116.2, 53.9, 70.9,<br>144.9                                |
| ORF1ab | IVTALRANSVAVKLQN | HLA-DRB1*08:02, HLA-<br>DRB1*13:02, HLA-DRB3*02:02,<br>HLA-DPA1*02:01/DPB1*14:01                                                                                                | 115.9, 9.4, 19.5, 408.7                                    |
| ORF1ab | KEIKESVQTFKLVN   | HLA-DPA1*02:01/DPB1*01:01,<br>HLA-DPA1*01:03/DPB1*02:01,<br>HLA-DPA1*01:03/DPB1*04:01                                                                                           | 107.1, 64.3, 94.0                                          |
| ORF1ab | KEMYLKLRSDVLLPL  | HLA-DRB1*01:01, HLA-<br>DRB1*04:05, HLA-<br>DPA1*02:01/DPB1*05:01                                                                                                               | 11.0, 68.0, 285.6                                          |
| ORF1ab | KGRLIIRENNRVVIS  | HLA-DRB1*12:01, HLA-<br>DRB1*13:02, HLA-DRB1*15:01,<br>HLA-DRB4*01:01                                                                                                           | 170.9, 9.5, 48.2, 58.8                                     |
| ORF1ab | KHFYWFFSNYLKRRV  | HLA-DRB1*15:01, HLA-<br>DPA1*02:01/DPB1*01:01, HLA-<br>DPA1*01:03/DPB1*02:01, HLA-<br>DPA1*01:03/DPB1*04:01, HLA-<br>DPA1*03:01/DPB1*04:02, HLA-<br>DPA1*02:01/DPB1*05:01       | 38.8, 57.3, 27.1, 38.3,<br>88.8, 115.3                     |
| ORF1ab | KSAFYILPSIISNEK  | HLA-DRB1*01:01, HLA-<br>DRB1*04:01, HLA-DRB1*04:05,<br>HLA-DRB1*08:02                                                                                                           | 9.3, 49.3, 47.5, 96.3                                      |
| ORF1ab | KTPKYKFVRIQPGQT  | HLA-DRB1*04:01, HLA-<br>DRB1*04:05, HLA-DRB1*08:02                                                                                                                              | 77.4, 90.3, 112.3                                          |
| ORF1ab | KYKVFVRIQPGQTFSV | HLA-DRB1*01:01, HLA-<br>DRB1*07:01, HLA-DRB1*08:02,<br>HLA-DRB1*09:01, HLA-<br>DRB1*11:01, HLA-DRB1*15:01,<br>HLA-DRB4*01:01, HLA-<br>DRB5*01:01, HLA-<br>DPA1*02:01/DPB1*14:01 | 7.2, 38.8, 67.3, 31.4,<br>30.6, 51.5, 58.3, 21.5,<br>421.1 |
| ORF1ab | KYLYFIKGLNNLNRG  | HLA-DRB1*08:02, HLA-<br>DRB1*11:01, HLA-DRB1*15:01,<br>HLA-DRB5*01:01                                                                                                           | 139.3, 38.1, 40.6, 32.8                                    |

|        |                  |                                                                                                                                                                                                             |                                                   |
|--------|------------------|-------------------------------------------------------------------------------------------------------------------------------------------------------------------------------------------------------------|---------------------------------------------------|
| ORF1ab | LASFSASTSAFVETV  | HLA-DRB1*07:01, HLA-DRB1*09:01, HLA-DRB3*02:02, HLA-DQA1*05:01/DQB1*03:01, HLA-DQA1*03:01/DQB1*03:02, HLA-DQA1*04:01/DQB1*04:02, HLA-DQA1*01:02/DQB1*06:02                                                  | 13.0, 20.8, 84.8, 62.8, 418.9, 302.9, 147.1       |
| ORF1ab | LCTFLLNKEMYLKLR  | HLA-DRB3*02:02, HLA-DPA1*02:01/DPB1*01:01, HLA-DPA1*01:03/DPB1*02:01, HLA-DPA1*01:03/DPB1*04:01, HLA-DPA1*03:01/DPB1*04:02                                                                                  | 43.0, 96.4, 63.1, 92.6, 130.6                     |
| ORF1ab | LEETKFLTENLLLYI  | HLA-DPA1*02:01/DPB1*01:01, HLA-DPA1*01:03/DPB1*02:01, HLA-DPA1*01:03/DPB1*04:01, HLA-DPA1*03:01/DPB1*04:02, HLA-DPA1*02:01/DPB1*05:01                                                                       | 36.9, 27.9, 37.3, 41.1, 145.1                     |
| ORF1ab | LFFFLYENAFLPFAM  | HLA-DRB1*04:05, HLA-DQA1*05:01/DQB1*02:01, HLA-DQA1*01:01/DQB1*05:01, HLA-DPA1*02:01/DPB1*01:01, HLA-DPA1*01:03/DPB1*02:01, HLA-DPA1*01:03/DPB1*04:01, HLA-DPA1*03:01/DPB1*04:02, HLA-DPA1*02:01/DPB1*05:01 | 72.4, 188.7, 136.1, 31.2, 14.9, 21.5, 37.1, 155.7 |
| ORF1ab | LGSLIYSTAALGVLM  | HLA-DRB1*01:01, HLA-DRB1*07:01, HLA-DRB1*09:01, HLA-DQA1*01:02/DQB1*06:02                                                                                                                                   | 14.0, 18.3, 36.1, 156.5                           |
| ORF1ab | LIVTALRANSVAVKLQ | HLA-DRB1*01:01, HLA-DRB1*07:01, HLA-DRB4*01:01, HLA-DQA1*01:02/DQB1*06:02, HLA-DPA1*02:01/DPB1*14:01                                                                                                        | 8.8, 39.2, 78.6, 142.5, 368.3                     |
| ORF1ab | LKHFFFAQDGNAAIS  | HLA-DRB1*01:01, HLA-DRB1*04:01, HLA-DRB1*04:05, HLA-DRB3*01:01, HLA-DRB3*02:02                                                                                                                              | 12.2, 33.6, 66.2, 32.8, 67.0                      |
| ORF1ab | LLKSIAATRGATVVI  | HLA-DRB1*01:01, HLA-DRB1*07:01, HLA-DRB1*09:01, HLA-DRB1*13:02, HLA-DQA1*01:02/DQB1*06:02, HLA-DPA1*02:01/DPB1*14:01                                                                                        | 10.9, 14.9, 26.5, 25.2, 161.4, 346.8              |
| ORF1ab | LNSIIKTIQPRVEKK  | HLA-DRB1*08:02, HLA-DRB1*12:01, HLA-DRB4*01:01                                                                                                                                                              | 143.2, 170.3, 52.0                                |
| ORF1ab | LPSYAAFATAQEAYE  | HLA-DQA1*05:01/DQB1*02:01, HLA-DQA1*03:01/DQB1*03:02, HLA-DQA1*04:01/DQB1*04:02                                                                                                                             | 163.1, 306.4, 191.8                               |
| ORF1ab | LSRVLGLKTLATHGL  | HLA-DRB1*08:02, HLA-DRB1*12:01, HLA-DRB4*01:01                                                                                                                                                              | 101.6, 184.9, 81.0                                |
| ORF1ab | LTFYLTNDVSFLAHI  | HLA-DRB1*03:01, HLA-DRB1*04:05, HLA-DRB3*01:01, HLA-DRB3*02:02                                                                                                                                              | 89.2, 70.5, 30.5, 40.4                            |
| ORF1ab | LVNKFLALCADSIII  | HLA-DRB1*01:01, HLA-DRB1*04:01, HLA-DRB1*04:05, HLA-DRB1*07:01, HLA-DRB1*09:01, HLA-DRB1*15:01, HLA-DQA1*05:01/DQB1*02:01,                                                                                  | 7.4, 56.7, 44.8, 29.9, 33.8, 59.3, 158.9, 234.9   |



|        |                 |                                                                                                                                           |                                                |
|--------|-----------------|-------------------------------------------------------------------------------------------------------------------------------------------|------------------------------------------------|
|        |                 | HLA-DQA1*01:01/DQB1*05:01                                                                                                                 |                                                |
| ORF1ab | LVRKIFVDGVPFVVS | HLA-DRB1*03:01, HLA-DRB1*13:02, HLA-DRB3*01:01                                                                                            | 46.5, 25.6, 22.8                               |
| ORF1ab | LYAFASEAARVVRSI | HLA-DRB1*07:01, HLA-DQA1*05:01/DQB1*03:01, HLA-DPA1*02:01/DPB1*14:01                                                                      | 28.5, 31.7, 313.2                              |
| ORF1ab | MIERFVSLAIDAYPL | HLA-DRB1*04:05, HLA-DQA1*05:01/DQB1*02:01, HLA-DQA1*04:01/DQB1*04:02, HLA-DPA1*02:01/DPB1*14:01                                           | 83.0, 96.3, 428.4, 392.1                       |
| ORF1ab | MLRIMASLVLARKHT | HLA-DRB1*11:01, HLA-DRB1*12:01, HLA-DRB1*15:01, HLA-DRB5*01:01                                                                            | 34.2, 97.2, 33.9, 23.7                         |
| ORF1ab | MPNMLRIMASLVLAR | HLA-DRB1*08:02, HLA-DRB4*01:01, HLA-DQA1*01:02/DQB1*06:02                                                                                 | 98.1, 38.6, 93.7                               |
| ORF1ab | MQLFFSYFAVHFISN | HLA-DQA1*01:01/DQB1*05:01, HLA-DPA1*01:03/DPB1*02:01, HLA-DPA1*01:03/DPB1*04:01, HLA-DPA1*03:01/DPB1*04:02                                | 232.8, 30.3, 45.4, 103.5                       |
| ORF1ab | MTYRRLISMMGFKMN | HLA-DRB1*01:01, HLA-DRB1*04:01, HLA-DRB1*04:05, HLA-DRB1*08:02, HLA-DRB1*09:01, HLA-DRB1*11:01, HLA-DRB5*01:01, HLA-DPA1*02:01/DPB1*14:01 | 6.4, 26.7, 27.7, 60.9, 42.4, 12.2, 13.5, 294.7 |
| ORF1ab | NEYRLYLDAYNMMIS | HLA-DRB1*04:05, HLA-DRB3*01:01, HLA-DQA1*01:01/DQB1*05:01                                                                                 | 85.5, 44.4, 160.5                              |
| ORF1ab | NFNVLSTVFPPTSF  | HLA-DPA1*02:01/DPB1*01:01, HLA-DPA1*01:03/DPB1*02:01, HLA-DPA1*01:03/DPB1*04:01, HLA-DPA1*03:01/DPB1*04:02                                | 88.8, 34.5, 51.0, 127.9                        |
| ORF1ab | NGDFLHFLPRVFSAV | HLA-DRB1*11:01, HLA-DRB1*12:01, HLA-DRB1*15:01                                                                                            | 30.2, 198.0, 50.0                              |
| ORF1ab | NLPFKLTCATTRQVV | HLA-DRB1*07:01, HLA-DRB1*09:01, HLA-DRB5*01:01                                                                                            | 35.9, 58.6, 23.9                               |
| ORF1ab | NLYDKLVSSFLEMKS | HLA-DPA1*01:03/DPB1*02:01, HLA-DPA1*01:03/DPB1*04:01, HLA-DPA1*03:01/DPB1*04:02, HLA-DPA1*02:01/DPB1*05:01                                | 36.7, 45.5, 64.9, 140.4                        |
| ORF1ab | NMLRIMASLVLARKH | HLA-DRB1*03:01, HLA-DQA1*01:02/DQB1*06:02, HLA-DPA1*02:01/DPB1*05:01, HLA-DPA1*02:01/DPB1*14:01                                           | 80.3, 164.2, 190.9, 210.1                      |
| ORF1ab | NNCYLATALLTLQQI | HLA-DPA1*02:01/DPB1*01:01, HLA-DPA1*01:03/DPB1*02:01, HLA-DPA1*01:03/DPB1*04:01, HLA-DPA1*03:01/DPB1*04:02                                | 111.3, 58.7, 79.7, 112.8                       |
| ORF1ab | PASRELKVTFPPDLN | HLA-DPA1*02:01/DPB1*01:01, HLA-DPA1*01:03/DPB1*02:01, HLA-DPA1*01:03/DPB1*04:01, HLA-DPA1*03:01/DPB1*04:02                                | 76.9, 48.9, 64.3, 149.5                        |
| ORF1ab | PFAMGIIAMSAFAMM | HLA-DRB1*01:01, HLA-DRB1*09:01, HLA-                                                                                                      | 12.3, 57.6, 45.6                               |

|        |                  |                                                                                                                                           |                                                 |
|--------|------------------|-------------------------------------------------------------------------------------------------------------------------------------------|-------------------------------------------------|
|        |                  | DQA1*05:01/DQB1*03:01                                                                                                                     |                                                 |
| ORF1ab | PNMLRIMASLVLARK  | HLA-DRB1*01:01, HLA-DRB1*07:01, HLA-DRB1*08:02, HLA-DRB1*09:01, HLA-DRB1*12:01, HLA-DRB1*15:01, HLA-DRB4*01:01                            | 8.9, 30.9, 82.4, 56.9, 69.9, 22.2, 34.2         |
| ORF1ab | QESPFVMMMSAPPAQY | HLA-DRB1*01:01, HLA-DRB1*04:05, HLA-DRB3*02:02                                                                                            | 5.0, 36.2, 53.3                                 |
| ORF1ab | QGLVASIKNFKSVLY  | HLA-DRB1*04:01, HLA-DRB1*04:05, HLA-DRB1*08:02, HLA-DRB1*11:01, HLA-DRB1*12:01, HLA-DRB4*01:01, HLA-DRB5*01:01                            | 18.3, 62.8, 86.5, 37.7, 115.4, 86.6, 24.5       |
| ORF1ab | QKLLKSIAATRQATV  | HLA-DRB1*01:01, HLA-DRB1*08:02, HLA-DRB4*01:01, HLA-DPA1*02:01/DPB1*14:01                                                                 | 9.1, 55.2, 73.1, 198.6                          |
| ORF1ab | QLCQYLNTLTLAVPY  | HLA-DRB1*01:01, HLA-DRB1*04:01, HLA-DRB1*04:05, HLA-DRB1*07:01                                                                            | 16.1, 66.8, 65.9, 35.8                          |
| ORF1ab | QMEIDFLELAMDEFI  | HLA-DQA1*05:01/DQB1*02:01, HLA-DQA1*03:01/DQB1*03:02, HLA-DQA1*01:01/DQB1*05:01                                                           | 57.2, 450.7, 125.8                              |
| ORF1ab | QMNLKYAISAKNRAR  | HLA-DRB1*01:01, HLA-DRB1*04:01, HLA-DRB1*08:02, HLA-DRB1*09:01, HLA-DRB1*11:01, HLA-DRB3*02:02, HLA-DPA1*02:01/DPB1*14:01                 | 14.9, 56.9, 49.1, 45.2, 22.1, 84.9, 158.3       |
| ORF1ab | QQKLALGGSVAIKIT  | HLA-DRB1*01:01, HLA-DRB1*07:01, HLA-DRB1*09:01, HLA-DQA1*05:01/DQB1*03:01                                                                 | 12.6, 23.4, 32.3, 42.9                          |
| ORF1ab | QTFKLVNKFLALCA   | HLA-DRB1*08:02, HLA-DRB1*12:01, HLA-DRB1*15:01, HLA-DPA1*02:01/DPB1*01:01, HLA-DPA1*01:03/DPB1*02:01                                      | 133.7, 197.3, 48.8, 81.5, 53.4                  |
| ORF1ab | QWLTNIFGTVYEKLLK | HLA-DPA1*02:01/DPB1*01:01, HLA-DPA1*01:03/DPB1*02:01, HLA-DPA1*01:03/DPB1*04:01, HLA-DPA1*03:01/DPB1*04:02                                | 60.0, 36.2, 50.9, 97.1                          |
| ORF1ab | QYNRYLALYNKYKYF  | HLA-DRB1*15:01, HLA-DRB5*01:01, HLA-DPA1*02:01/DPB1*05:01                                                                                 | 50.0, 27.1, 242.9                               |
| ORF1ab | RFKESPFLEDFIPM   | HLA-DPA1*02:01/DPB1*01:01, HLA-DPA1*01:03/DPB1*02:01, HLA-DPA1*01:03/DPB1*04:01, HLA-DPA1*03:01/DPB1*04:02                                | 74.0, 65.9, 81.9, 130.6                         |
| ORF1ab | RFYFYTSKTTVASLI  | HLA-DRB1*01:01, HLA-DRB1*04:01, HLA-DRB1*04:05, HLA-DRB1*07:01, HLA-DRB1*08:02, HLA-DRB1*09:01, HLA-DRB3*02:02, HLA-DPA1*02:01/DPB1*14:01 | 10.1, 44.5, 75.7, 17.5, 98.6, 30.5, 46.1, 466.8 |
| ORF1ab | RIKIVQMLSDTLKLN  | HLA-DRB1*04:01, HLA-DRB1*04:05, HLA-DRB1*15:01, HLA-DRB4*01:01                                                                            | 78.1, 58.8, 55.3, 43.4                          |
| ORF1ab | RLKLFAAETLKATEE  | HLA-DRB1*08:02, HLA-                                                                                                                      | 100.9, 58.6, 109.5                              |

|        |                  |                                                                                                                                       |                                     |
|--------|------------------|---------------------------------------------------------------------------------------------------------------------------------------|-------------------------------------|
|        |                  | DRB1*15:01, HLA-DPA1*02:01/DPB1*01:01                                                                                                 |                                     |
| ORF1ab | RRLISMMGFKMNYQV  | HLA-DRB1*08:02, HLA-DRB1*11:01, HLA-DPA1*02:01/DPB1*05:01                                                                             | 134.2, 30.5, 251.6                  |
| ORF1ab | SAFAMMFVKHKHAFL  | HLA-DRB1*08:02, HLA-DRB1*11:01, HLA-DRB1*15:01, HLA-DRB4*01:01, HLA-DRB5*01:01                                                        | 110.4, 18.3, 50.9, 79.2, 15.1       |
| ORF1ab | SFLAHIQWMVMFTPL  | HLA-DPA1*02:01/DPB1*01:01, HLA-DPA1*01:03/DPB1*02:01, HLA-DPA1*01:03/DPB1*04:01, HLA-DPA1*03:01/DPB1*04:02                            | 103.9, 47.8, 70.7, 140.6            |
| ORF1ab | SHKLVLSVNPYVCNA  | HLA-DRB1*04:01, HLA-DRB1*04:05, HLA-DRB1*08:02, HLA-DRB1*13:02, HLA-DRB1*15:01, HLA-DRB3*02:02                                        | 49.7, 72.9, 138.5, 11.4, 41.4, 32.5 |
| ORF1ab | SHRFYRLANECAQVL  | HLA-DRB1*01:01, HLA-DRB1*04:01, HLA-DRB1*04:05                                                                                        | 14.3, 50.4, 56.9                    |
| ORF1ab | SIGFDYVYNPFMIDV  | HLA-DPA1*02:01/DPB1*01:01, HLA-DPA1*01:03/DPB1*02:01, HLA-DPA1*01:03/DPB1*04:01, HLA-DPA1*03:01/DPB1*04:02                            | 108.9, 47.1, 81.9, 137.6            |
| ORF1ab | SLLMPILTLTRALTA  | HLA-DRB1*11:01, HLA-DRB1*12:01, HLA-DRB4*01:01                                                                                        | 37.3, 122.2, 59.9                   |
| ORF1ab | SPFVMMMSAPPAQYEL | HLA-DRB1*08:02, HLA-DRB1*09:01, HLA-DQA1*05:01/DQB1*03:01                                                                             | 58.3, 33.8, 65.6                    |
| ORF1ab | SPLYAFASEAARVVR  | HLA-DRB1*09:01, HLA-DQA1*01:02/DQB1*06:02, HLA-DPA1*02:01/DPB1*14:01                                                                  | 28.9, 173.6, 397.7                  |
| ORF1ab | SVQTFKLVNKFLAL   | HLA-DRB1*11:01, HLA-DPA1*02:01/DPB1*01:01, HLA-DPA1*01:03/DPB1*04:01, HLA-DPA1*03:01/DPB1*04:02, HLA-DPA1*02:01/DPB1*05:01            | 23.5, 76.9, 70.7, 111.5, 113.3      |
| ORF1ab | TCLAYYFMRFRRAFG  | HLA-DRB1*08:02, HLA-DRB1*11:01, HLA-DRB1*15:01                                                                                        | 143.9, 16.4, 44.7                   |
| ORF1ab | TDFVNEFYAYLRKHF  | HLA-DPA1*02:01/DPB1*01:01, HLA-DPA1*01:03/DPB1*02:01, HLA-DPA1*01:03/DPB1*04:01, HLA-DPA1*03:01/DPB1*04:02, HLA-DPA1*02:01/DPB1*05:01 | 90.9, 46.9, 67.2, 144.4, 239.2      |
| ORF1ab | TEETFKLSYGIATVR  | HLA-DRB1*01:01, HLA-DRB1*07:01, HLA-DRB1*09:01                                                                                        | 8.7, 21.8, 25.9                     |
| ORF1ab | TEKYCALAPNMMVTN  | HLA-DRB1*01:01, HLA-DRB1*04:01, HLA-DRB1*04:05, HLA-DRB1*09:01                                                                        | 8.5, 55.1, 71.1, 27.8               |
| ORF1ab | TERLKLFAAETLKAT  | HLA-DRB1*09:01, HLA-DRB1*15:01, HLA-DPA1*02:01/DPB1*01:01, HLA-DPA1*02:01/DPB1*05:01, HLA-DPA1*02:01/DPB1*14:01                       | 51.9, 46.6, 99.4, 161.5, 214.9      |
| ORF1ab | TEVNEFACVVADAVI  | HLA-DQA1*05:01/DQB1*02:01, HLA-DQA1*03:01/DQB1*03:02,                                                                                 | 136.8, 424.7, 351.1                 |

|        |                  |                                                                                                                                       |                                    |
|--------|------------------|---------------------------------------------------------------------------------------------------------------------------------------|------------------------------------|
|        |                  | HLA-DQA1*04:01/DQB1*04:02                                                                                                             |                                    |
| ORF1ab | TNSRIKASMPPTIAK  | HLA-DRB1*07:01, HLA-DRB1*09:01, HLA-DRB1*13:02                                                                                        | 38.1, 51.7, 20.6                   |
| ORF1ab | TRYVLMDGSIIQFPN  | HLA-DRB1*01:01, HLA-DRB1*03:01, HLA-DRB1*04:01, HLA-DRB1*04:05                                                                        | 10.7, 46.6, 58.2, 85.6             |
| ORF1ab | TSAMQTMLFTMLRKL  | HLA-DPA1*02:01/DPB1*01:01, HLA-DPA1*01:03/DPB1*04:01, HLA-DPA1*03:01/DPB1*04:02, HLA-DPA1*02:01/DPB1*05:01                            | 98.6, 87.4, 113.4, 162.8           |
| ORF1ab | TYRRLISMMGFKMNY  | HLA-DRB1*12:01, HLA-DRB1*15:01, HLA-DRB4*01:01, HLA-DRB5*01:01, HLA-DPA1*02:01/DPB1*05:01                                             | 66.9, 15.3, 34.3, 13.9, 166.5      |
| ORF1ab | VFTGYRVTKNSKVQI  | HLA-DRB1*07:01, HLA-DRB1*09:01, HLA-DRB3*02:02, HLA-DRB5*01:01                                                                        | 19.1, 50.7, 53.1, 31.4             |
| ORF1ab | VLSFCFAVAVDAAKAY | HLA-DQA1*05:01/DQB1*02:01, HLA-DQA1*04:01/DQB1*04:02, HLA-DQA1*01:02/DQB1*06:02                                                       | 203.9, 360.2, 143.4                |
| ORF1ab | VLVQSTQWSLFFFLY  | HLA-DPA1*02:01/DPB1*01:01, HLA-DPA1*01:03/DPB1*02:01, HLA-DPA1*01:03/DPB1*04:01, HLA-DPA1*03:01/DPB1*04:02                            | 77.0, 35.3, 42.3, 93.1             |
| ORF1ab | VNRFNVAITRAKVGI  | HLA-DRB1*08:02, HLA-DRB1*11:01, HLA-DRB5*01:01, HLA-DPA1*02:01/DPB1*14:01                                                             | 78.4, 31.7, 12.1, 389.7            |
| ORF1ab | VNTFSSTFNVPMEKL  | HLA-DRB1*04:01, HLA-DRB1*04:05, HLA-DRB1*07:01                                                                                        | 77.6, 84.5, 38.7                   |
| ORF1ab | VQSTQWSLFFFLYEN  | HLA-DPA1*02:01/DPB1*01:01, HLA-DPA1*01:03/DPB1*02:01, HLA-DPA1*03:01/DPB1*04:02                                                       | 107.1, 49.9, 129.8                 |
| ORF1ab | VTCLAYYFMRFRRAF  | HLA-DPA1*02:01/DPB1*01:01, HLA-DPA1*01:03/DPB1*02:01, HLA-DPA1*01:03/DPB1*04:01, HLA-DPA1*03:01/DPB1*04:02, HLA-DPA1*02:01/DPB1*05:01 | 94.2, 49.1, 62.2, 121.3, 132.7     |
| ORF1ab | VVDSYYSLLMPILTL  | HLA-DPA1*02:01/DPB1*01:01, HLA-DPA1*01:03/DPB1*02:01, HLA-DPA1*01:03/DPB1*04:01, HLA-DPA1*03:01/DPB1*04:02                            | 102.1, 58.0, 84.6, 114.6           |
| ORF1ab | VVLKCLKKSLNVAKS  | HLA-DRB1*08:02, HLA-DRB4*01:01, HLA-DRB5*01:01                                                                                        | 112.7, 76.3, 31.4                  |
| ORF1ab | WLIINLVQMAPISAM  | HLA-DRB1*12:01, HLA-DRB4*01:01, HLA-DQA1*01:02/DQB1*06:02                                                                             | 130.6, 65.9, 139.6                 |
| ORF1ab | YFAVHFISNSWLMWL  | HLA-DRB1*07:01, HLA-DPA1*02:01/DPB1*01:01, HLA-DPA1*01:03/DPB1*02:01, HLA-DPA1*01:03/DPB1*04:01                                       | 36.2, 84.0, 33.4, 55.3             |
| ORF1ab | YFMRFRRAFGEYSHV  | HLA-DRB1*04:01, HLA-DRB1*04:05, HLA-DRB1*15:01                                                                                        | 53.9, 50.7, 53.5                   |
| ORF1ab | YFNMVYMPASWVMRI  | HLA-DRB1*01:01, HLA-DRB1*04:05, HLA-DRB1*07:01, HLA-DRB1*09:01, HLA-                                                                  | 8.3, 80.2, 38.2, 37.4, 184.5, 30.1 |

|        |                  |                                                                                                                                                                |                                                             |
|--------|------------------|----------------------------------------------------------------------------------------------------------------------------------------------------------------|-------------------------------------------------------------|
|        |                  | DRB1*12:01, HLA-DRB1*15:01                                                                                                                                     |                                                             |
| ORF1ab | YLYFIKGLNNLNRGM  | HLA-DRB1*01:01, HLA-DRB1*04:01, HLA-DRB1*04:05, HLA-DRB1*11:01, HLA-DRB3*02:02                                                                                 | 9.7, 27.4, 32.3, 44.4, 70.3                                 |
| ORF3   | KKRWQLALSKGVHVFV | HLA-DRB1*01:01, HLA-DRB1*07:01, HLA-DRB1*08:02, HLA-DRB1*09:01, HLA-DRB1*11:01, HLA-DRB1*12:01, HLA-DRB1*13:02, HLA-DRB1*15:01, HLA-DRB4*01:01, HLA-DRB5*01:01 | 9.2, 11.6, 200.3, 17.9, 43.1, 119.6, 30.0, 34.2, 79.8, 18.4 |
| ORF3   | SDFVRATATIPIQAS  | HLA-DRB1*01:01, HLA-DRB1*07:01, HLA-DRB1*08:02, HLA-DRB1*09:01, HLA-DRB1*13:02                                                                                 | 12.5, 16.0, 88.5, 27.8, 27.6                                |
| ORF3   | PSDFVRATATIPIQA  | HLA-DRB1*04:01, HLA-DRB1*04:05, HLA-DRB1*08:02                                                                                                                 | 54.4, 90.0, 100.9                                           |
| ORF3   | YCIPYNSVTSSIVIT  | HLA-DRB1*07:01, HLA-DRB1*09:01                                                                                                                                 | 24.3, 44.7                                                  |
| ORF3   | ASKIITLKKRWQLAL  | HLA-DRB1*08:02, HLA-DRB1*11:01                                                                                                                                 | 121.0, 20.5                                                 |
| ORF3   | FVRATATIPIQASLP  | HLA-DRB1*09:01, HLA-DQA1*01:02/DQB1*06:02, HLA-DPA1*02:01/DPB1*14:01                                                                                           | 45.7, 47.8, 196.9                                           |
| ORF3   | VFQSASKIITLKKRW  | HLA-DRB1*11:01, HLA-DRB5*01:01                                                                                                                                 | 32.2, 26.3                                                  |
| ORF3   | YFLQSINFVRIIMRL  | HLA-DRB1*12:01, HLA-DRB1*15:01, HLA-DRB4*01:01, HLA-DPA1*02:01/DPB1*05:01                                                                                      | 124.4, 52.2, 81.9, 175.5                                    |
| ORF3   | VRATATIPIQASLPF  | HLA-DQA1*04:01/DQB1*04:02, HLA-DQA1*01:02/DQB1*06:02                                                                                                           | 492.8, 51.5                                                 |
| ORF3   | VYFLQSINFVRIIMR  | HLA-DPA1*02:01/DPB1*01:01, HLA-DPA1*03:01/DPB1*04:02                                                                                                           | 58.7, 54.9                                                  |
| ORF3   | VLHSYFTSDYYQLYS  | HLA-DPA1*02:01/DPB1*01:01, HLA-DPA1*01:03/DPB1*02:01, HLA-DPA1*01:03/DPB1*04:01, HLA-DPA1*03:01/DPB1*04:02                                                     | 65.6, 33.1, 40.3, 93.4                                      |
| ORF3   | LVEFLQSINFVRIIM  | HLA-DPA1*01:03/DPB1*02:01, HLA-DPA1*01:03/DPB1*04:01                                                                                                           | 24.8, 32.9                                                  |
| ORF6   | HLVDFQVTIAEILLI  | HLA-DRB1*07:01, HLA-DQA1*05:01/DQB1*02:01                                                                                                                      | 36.7, 198.5                                                 |
| ORF6   | YIINLIKNLSKSLT   | HLA-DRB1*08:02, HLA-DRB1*11:01, HLA-DRB1*12:01, HLA-DRB1*13:02, HLA-DRB3*02:02, HLA-DRB4*01:01                                                                 | 113.5, 32.4, 135.4, 15.4, 43.6, 68.3                        |
| ORF6   | IINLIKNLSKSLTE   | HLA-DRB1*08:02, HLA-DRB1*11:01                                                                                                                                 | 118.6, 31.7                                                 |
| ORF6   | EILLIMRTFKVSIW   | HLA-DRB1*08:02, HLA-DRB1*12:01, HLA-DRB1*15:01, HLA-DRB4*01:01                                                                                                 | 130.2, 90.4, 20.2, 62.6                                     |
| ORF6   | DYIINLIKNLSKSL   | HLA-DRB1*11:01, HLA-DRB1*12:01, HLA-DRB3*02:02, HLA-DRB4*01:01                                                                                                 | 41.9, 166.1, 42.9, 77.1                                     |
| ORF6   | FKVSIWNLDYIINLI  | HLA-DRB3*01:01, HLA-                                                                                                                                           | 66.1, 90.1                                                  |

|       |                 |                                                                                                                                                   |                                   |
|-------|-----------------|---------------------------------------------------------------------------------------------------------------------------------------------------|-----------------------------------|
|       |                 | DQA1*01:01/DQB1*05:01                                                                                                                             |                                   |
| ORF6  | MFHLVDFQVTIAEIL | HLA-DQA1*05:01/DQB1*02:01,<br>HLA-DQA1*01:01/DQB1*05:01,<br>HLA-DPA1*02:01/DPB1*01:01,<br>HLA-DPA1*01:03/DPB1*04:01                               | 192.0, 292.1, 108.3,<br>100.7     |
| ORF6  | MRTFKVSIWNLDYII | HLA-DPA1*02:01/DPB1*01:01,<br>HLA-DPA1*01:03/DPB1*02:01,<br>HLA-DPA1*01:03/DPB1*04:01,<br>HLA-DPA1*03:01/DPB1*04:02,<br>HLA-DPA1*02:01/DPB1*05:01 | 79.0, 44.3, 60.7,<br>110.1, 304.0 |
| ORF7  | VKHVYQLRARSVSPK | HLA-DRB1*01:01, HLA-<br>DRB1*08:02, HLA-DRB1*11:01,<br>HLA-DRB4*01:01                                                                             | 14.3, 150.6, 38.3, 86.6           |
| ORF7  | GVKHVYQLRARSVSP | HLA-DRB1*11:01, HLA-<br>DRB4*01:01                                                                                                                | 39.6, 82.1                        |
| ORF7  | NKFALTCFSTQFAFA | HLA-DPA1*02:01/DPB1*01:01,<br>HLA-DPA1*01:03/DPB1*02:01,<br>HLA-DPA1*01:03/DPB1*04:01,<br>HLA-DPA1*03:01/DPB1*04:02,<br>HLA-DPA1*02:01/DPB1*05:01 | 50.9, 29.1, 35.9, 80.2,<br>273.4  |
| ORF7  | EEVQELYSPIFLIVA | HLA-DPA1*02:01/DPB1*01:01,<br>HLA-DPA1*01:03/DPB1*02:01                                                                                           | 59.7, 30.7                        |
| ORF7  | FALTCFSTQFAFACP | HLA-DPA1*01:03/DPB1*02:01,<br>HLA-DPA1*01:03/DPB1*04:01                                                                                           | 61.9, 76.1                        |
| ORF7  | EVQELYSPIFLIVAA | HLA-DPA1*01:03/DPB1*04:01,<br>HLA-DPA1*03:01/DPB1*04:02                                                                                           | 44.2, 74.6                        |
| ORF8  | SKWYIRVGARKSAPL | HLA-DRB1*01:01, HLA-<br>DRB1*08:02, HLA-DRB1*09:01,<br>HLA-DRB1*11:01, HLA-<br>DRB5*01:01                                                         | 13.7, 87.8, 50.7, 15.3,<br>8.8    |
| ORF8  | LVVRCSFYEDFLEYH | HLA-DQA1*01:01/DQB1*05:01,<br>HLA-DPA1*02:01/DPB1*01:01,<br>HLA-DPA1*01:03/DPB1*04:01,<br>HLA-DPA1*03:01/DPB1*04:02                               | 177.0, 87.4, 89.3,<br>166.8       |
| ORF10 | FAFPFTIYSLLLCRM | HLA-DPA1*02:01/DPB1*01:01,<br>HLA-DPA1*01:03/DPB1*02:01,<br>HLA-DPA1*01:03/DPB1*04:01,<br>HLA-DPA1*03:01/DPB1*04:02                               | 97.3, 37.2, 56.9, 104.8           |
| ORF10 | INVFAFPFTIYSLLL | HLA-DPA1*02:01/DPB1*01:01,<br>HLA-DPA1*01:03/DPB1*02:01,<br>HLA-DPA1*01:03/DPB1*04:01,<br>HLA-DPA1*03:01/DPB1*04:02                               | 102.1, 36.8, 57.3,<br>126.7       |
| ORF10 | YINVFAFPFTIYSL  | HLA-DPA1*01:03/DPB1*02:01,<br>HLA-DPA1*03:01/DPB1*04:02                                                                                           | 42.9, 142.3                       |

**Table S4.** Allergenicity and toxicity for top predicted SARS-CoV-2 T cell epitopes.

| <b><u>Peptide</u></b> | <b><u>Viral Protein</u></b> | <b><u>ToxinPred Score</u></b> | <b><u>AllerCatPro Result</u></b> |
|-----------------------|-----------------------------|-------------------------------|----------------------------------|
| FAMQMAYRF             | S                           | -1.23 (Non-toxin)             | No hits                          |
| LSFKELLY              | ORF1ab                      | -1.24 (Non-toxin)             | No hits                          |
| MMISAGFSL             | ORF1ab                      | -1.13 (Non-toxin)             | No hits                          |
| MSNLGMPSY             | ORF1ab                      | -1.36 (Non-toxin)             | No hits                          |

|                  |        |                   |         |
|------------------|--------|-------------------|---------|
| STNVTIATY        | ORF1ab | -0.92 (Non-toxin) | No hits |
| ASFRLFARTRSMWSF  | M      | -0.99 (Non-toxin) | No hits |
| LLQFAYANRNRFLYI  | M      | -0.27 (Non-toxin) | No hits |
| AAEIRASANLAATKM  | S      | -1.00 (Non-toxin) | No hits |
| ALQIPFAMQMAYRFN  | S      | -1.16 (Non-toxin) | No hits |
| PYRVVVLSEFELLHAP | S      | -1.50 (Non-toxin) | No hits |
| QPYRVVVLSEFELLHA | S      | -1.65 (Non-toxin) | No hits |
| YQPYRVVVLSEFELLH | S      | -1.53 (Non-toxin) | No hits |
| ANYIFWRNTNPIQLS  | ORF1ab | -0.98 (Non-toxin) | No hits |
| FKWDLTAFGLVAEWF  | ORF1ab | -1.11 (Non-toxin) | No hits |
| HIQWMVMFTPLVPFW  | ORF1ab | -1.26 (Non-toxin) | No hits |
| IINLVQMAPISAMVR  | ORF1ab | -0.93 (Non-toxin) | No hits |
| INLVQMAPISAMVRM  | ORF1ab | -1.17 (Non-toxin) | No hits |
| IVFMCVEYCPIFFIT  | ORF1ab | -0.04 (Non-toxin) | No hits |
| IVTALRANS AVKLQN | ORF1ab | -0.68 (Non-toxin) | No hits |
| KGRLIIRENNRVVIS  | ORF1ab | -0.62 (Non-toxin) | No hits |
| KSAFYILPSIISNEK  | ORF1ab | -1.50 (Non-toxin) | No hits |
| LIVTALRANS AVKLQ | ORF1ab | -0.76 (Non-toxin) | No hits |
| NLPFKLTCATTRQVV  | ORF1ab | -0.37 (Non-toxin) | No hits |
| PASRELKVTFPPDLN  | ORF1ab | -1.11 (Non-toxin) | No hits |
| PFAMGIIAMSAFAMM  | ORF1ab | -1.03 (Non-toxin) | No hits |
| QMNLKYAISAKNRAR  | ORF1ab | -0.93 (Non-toxin) | No hits |
| QKALALGGVAIKIT   | ORF1ab | -1.35 (Non-toxin) | No hits |
| RFKESPFELDFIPM   | ORF1ab | -1.04 (Non-toxin) | No hits |
| SAFAMMFVKHKHAFL  | ORF1ab | -0.99 (Non-toxin) | No hits |
| SFLAHIQWMVMFTPL  | ORF1ab | -1.00 (Non-toxin) | No hits |
| SIGFDYVYNPFMIDV  | ORF1ab | -0.90 (Non-toxin) | No hits |
| TEETFKLSYGIATVR  | ORF1ab | -1.05 (Non-toxin) | No hits |
| VLVQSTQWSLFFFLY  | ORF1ab | -0.68 (Non-toxin) | No hits |
| VQSTQWSLFFFLYEN  | ORF1ab | -0.69 (Non-toxin) | No hits |
| WLIINLVQMAPISAM  | ORF1ab | -1.03 (Non-toxin) | No hits |
| YFNMVYMPASWVMRI  | ORF1ab | -1.93 (Non-toxin) | No hits |
| KKRWQLALS KGVHFV | ORF3   | -1.49 (Non-toxin) | No hits |
| MFHLVDFQVTIAEIL  | ORF6   | -1.01 (Non-toxin) | No hits |
| VKHVYQLRARSVSPK  | ORF7   | -0.84 (Non-toxin) | No hits |
| NKFALTCFSTQFAFA  | ORF7   | -1.01 (Non-toxin) | No hits |
| SKWYIRVGARKSAPL  | ORF8   | -0.87 (Non-toxin) | No hits |

**Table S5.** B cell epitopes identified from SARS-CoV-2 structural proteins.

| <b>Linear B cell Epitopes*</b>                        |                 |                      |                                   |
|-------------------------------------------------------|-----------------|----------------------|-----------------------------------|
| <b>Peptide</b>                                        | <b>Residues</b> | <b>Viral Protein</b> | <b>Bepipred Score<sup>a</sup></b> |
| MSDNGPQNQRNAPRITFGG PSDST<br>GSNQN GERSGARSKQRRPQGLPN | 1 – 51          | N                    | 1.53                              |

|                                                               |             |               |       |
|---------------------------------------------------------------|-------------|---------------|-------|
| NTAS                                                          |             |               |       |
| QHGKEDLKFPARGQVPINTNSSPD<br>DQIG                              | 58 – 85     | N             | 1.09  |
| RIRGGDGKMKDL                                                  | 93 – 104    | N             | 0.844 |
| TGPEAGLPYGANK                                                 | 115 – 127   | N             | 1.19  |
| GALNTPKDHIGTRNPANN                                            | 137 – 154   | N             | 1.09  |
| GTTLPGGFYAEGSRGGSQASSRSS<br>SRSRNSSRNSTPGSSRGTSPARMA<br>GNGGD | 164 – 216   | N             | 1.40  |
| SKMSGKGQQQQGQTVTKKSAAEA<br>SKKPRQKRTATKAYN                    | 232 – 269   | N             | 1.18  |
| AFGRRGPEQTQGNFG                                               | 273 – 287   | N             | 1.34  |
| TDYKHW                                                        | 296 – 301   | N             | 0.759 |
| QFAPS                                                         | 306 – 310   | N             | 0.579 |
| EVTPSGTWL                                                     | 323 – 331   | N             | 0.678 |
| KLDDKDPNFK                                                    | 338 – 347   | N             | 1.05  |
| KTFPPTPEPKDKKKKKADETQALPQ<br>RQKKQQ                           | 361 – 390   | N             | 1.45  |
| QQSMSSADSTQA                                                  | 408 – 419   | N             | 1.06  |
| MADSNGTI                                                      | 2 – 9       | M             | 0.61  |
| QRVAGDSGFA                                                    | 186 – 195   | M             | 0.783 |
| LNTDHSSSSD                                                    | 207 – 216   | M             | 0.976 |
| RTQLPPAYTNS                                                   | 21 – 31     | S – S1 domain | 0.881 |
| SGTNGTKRFDN                                                   | 71 – 81     | S – S1 domain | 0.885 |
| GKQGNF                                                        | 181 – 186   | S – S1 domain | 0.637 |
| LTPGDSSSGWTAG                                                 | 249 – 261   | S – S1 domain | 1.36  |
| NGTITD                                                        | 282 – 287   | S – S1 domain | 0.804 |
| FRVQPTE                                                       | 318 – 324   | S – S1 domain | 0.561 |
| <b>VRQIAPGQTGKIAD</b>                                         | 407 – 420   | S – S1 domain | 0.928 |
| YKLPDD                                                        | 423 – 428   | S – S1 domain | 0.602 |
| <b>NNLDSKVG</b>                                               | 439 – 447   | S – S1 domain | 0.770 |
| YQAGSTPCNGV                                                   | 473 – 483   | S – S1 domain | 0.985 |
| <b>YGFQPTNGVGYQ</b>                                           | 495 – 506   | S – S1 domain | 1.01  |
| TVCGPKKSTN                                                    | 523 – 532   | S – S1 domain | 0.867 |
| <b>RDIADTTDAVRDPQ</b>                                         | 567 – 580   | S – S1 domain | 0.959 |
| VITPGTNTSN                                                    | 597 – 606   | S – S1 domain | 1.11  |
| RVYST                                                         | 634 – 638   | S – S1 domain | 0.483 |
| QTQTNSPRRARSV                                                 | 675 – 687   | S – S2 domain | 1.148 |
| VEQDKNTQE                                                     | 772 – 780   | S – S2 domain | 0.888 |
| <b>IYKTPPIKDF</b>                                             | 788 – 797   | S – S2 domain | 0.751 |
| ILPDPSKPSKRS                                                  | 805 – 816   | S – S2 domain | 1.29  |
| DSLST                                                         | 936 – 941   | S – S2 domain | 0.618 |
| QSAPH                                                         | 1054 – 1058 | S – S2 domain | 0.84  |
| PAQEKNTFT                                                     | 1069 – 1077 | S – S2 domain | 0.84  |
| KAHFP                                                         | 1086 – 1090 | S – S2 domain | 0.665 |



|                                              |                         |                             |                                           |
|----------------------------------------------|-------------------------|-----------------------------|-------------------------------------------|
| <b>VYDPLQPELDSF</b>                          | 1137 – 1148             | S – S2 domain               | 0.747                                     |
| KNHTSPDVDLG                                  | 1157 – 1167             | S – S2 domain               | 0.918                                     |
| FDEDDSEPVL                                   | 1256 – 1265             | S – S2 domain               | 1.09                                      |
| <b><u>Discontinuous B cell Epitopes*</u></b> |                         |                             |                                           |
| <b><u>Peptide</u><sup>#</sup></b>            | <b><u>Residues</u></b>  | <b><u>Viral Protein</u></b> | <b><u>DiscoTope Score</u><sup>a</sup></b> |
| DKVF                                         | 40 – 43                 | S – S1 domain               | -5.12                                     |
| TPINLVR                                      | 208 – 214               | S – S1 domain               | -6.36                                     |
| <b>DEV</b> RQ                                | 405 – 409               | S – S1 domain               | -7.83                                     |
| <b>PGQTGKIADY</b>                            | 412 – 421               | S – S1 domain               | -5.79                                     |
| <b>KLPDD</b>                                 | 424 – 428               | S – S1 domain               | -6.19                                     |
| <b>NLDS---</b> YN                            | 440 – 443;<br>449 – 450 | S – S1 domain               | -6.62                                     |
| <b>QPTNGVG</b>                               | 498 – 504               | S – S1 domain               | -6.33                                     |
| NKKFLPFQQ                                    | 556 – 564               | S – S1 domain               | -5.09                                     |
| <b>RDIADT</b>                                | 567 – 572               | S – S1 domain               | -5.69                                     |
| AENSVAYSN                                    | 701 – 709               | S – S2 domain               | -6.10                                     |
| <b>PPIKD</b>                                 | 792 – 796               | S – S2 domain               | -3.28                                     |
| DPSK                                         | 808 – 811               | S- S2 domain                | -2.61                                     |
| SRLD---E                                     | 982 – 985;<br>988       | S – S2 domain               | -7.01                                     |
| NGTH                                         | 1098 – 1101             | S – S2 domain               | -6.36                                     |
| EPQI                                         | 1111 – 1114             | S – S2 domain               | -6.46                                     |
| <b>YDPLQPELD</b>                             | 1138 – 1146             | S – S2 domain               | -4.12                                     |

\*Bold type indicates residues with overlapping sequences in both linear and discontinuous epitope analysis (see Table 2 in main text).

<sup>a</sup>Reported scores represent the average calculated across all amino acids.

<sup>#</sup>Gaps in represent residues in the amino acid sequence that were not resolved in the S protein crystal structure (PDB ID: 6VSB) and excluded from DiscoTope score predictions.
